# Supplementary material
Source: Research Square preprint supplement (doi:10.21203/rs.3.rs-6305715/v1)
Supplement: Supplementary file 1 [file 18d9510469b0e2a288f9dd79.docx]

Reviewer #1 (Comments for the Author):

1.1 The revision shows improvement through physiological and biochemical analyses over the initial submission, however, the responses to several key scientific questions remain insufficient. The major concern on the mechanistic insight into the function of these identified genes for FL tolerance remains.

**Reply 1.1:** We identified point mutations in a PSII assembly factor (PAM68) and a response regulator (RpaB), which facilitate FL tolerance. We could also associate increasing PSII abundance and activity with the PAM68 mutation, and increasing the PSI/PSII ratio and downregulating light harvesting with the RpaB mutation. We believe that the identification of the underlying mutations and characterisation of the physiological consequences of two of the mutations in this FL tolerance screen represents a major effort. However, we could not identify the exact molecular mechanisms by which the point mutations 'activate' the proteins. We believe this is beyond the scope of this manuscript. Based on our experience with previous high light (HL-) ALE experiments, after four years of extensive research, we have start to discover how such point mutations can confer high light tolerance. Therefore, I think the reviewer is asking for too much in one manuscript.

1.2 Regarding the function of Pam68, the authors used AlphaFold3 predictions and found no structural changes in the mutant protein. The newly added physiological and biochemical experiments only assess the effect of the mutation on photosynthetic electron transport, which does not provide insight into the functional mechanism of the protein. The authors showed expressing of the wild-type allele of Arabidopsis AtPAM68 in the cyanobacterial PAM68 FL-mutant allele improved HL tolerance. This casts doubts on the conserved function of PAM68 in FL tolerance.

**Reply 1.2**: As mentioned in Reply 1.1, we believe that identifying the exact molecular mechanism of PAM68 and its mutation is very difficult and beyond the scope of this manuscript, which aims to demonstrate that the tolerance of FL can be increased through strategic point mutations. Clearly, the PAM68 protein and mutation of this particular residue impact light stress tolerance, but exchanging the amino acid residues at this position obviously has positive effects on plant and cyanobacterial proteins, demonstrating the effect of this amino acid residue in the context of the remainder of the protein. We have phrased this more clearly in our manuscript than before.

We write now in the Results section: “However, it seems that the rest of the protein sequence determines whether an increased tolerance to FL0final or HL700 results from a serine or a glycine at this conserved position (glycine in *Synechocystis* Pam68 for tolerance to both FL0final and HL700; serine in AtPAM68 for HL700 tolerance). **Therefore, it can be concluded that the role of PAM68 in FL tolerance is most likely not conserved in flowering plants.”**

And at the end of the discussion: “Cross-species experiments with the Pam68 protein indicate that the FL tolerance function of the mutation found in Synechocystis is not conserved in land plant.”

1.3 Regarding the presence of RpaB/ycf27 in higher plants, Ashby et al. (2002) have conducted a detailed evolutionary analysis and concluded that ycf27 is absent in higher plants. In response to the authors' reply, they suggested that several proteins with amino acid sequence similarity to RpaB exist in land plants, with sequence coverage ranging from 90% to 100%. These are found in Sphagnum balticum and jensenii (peat moss), Tanacetum cinerariifolium (similar to chamomile), and Ipomea batatas (sweet potato). Actually, I cannot find that sequence coverage ranging from 90% to 100% of RpaB/ycf27 in these. However, we noted that in the evolutionary tree provided by the authors, the most closely related protein, GEW94089.1, consists of 2113 amino acids. Moreover, I am unable to find the gene referred to by the authors as the homolog of RpaB in eukaryotic algae (Ycf2745).

**Reply 1.3:** The reviewer refers to our response to his comments. To avoid any misinterpretation, we have now included in the manuscript the fact that the presence of RpaB in plastid genomes correlates with the presence of genes that encode phycobiliproteins, as explicitly stated in Ashby et al. (2002).

In the Discussion: “The *rpaB* gene is essential41,57, and orthologs have been identified in the plastid genomes of algae that also possess genes encoding phycobiliproteins45

And later: “Given that RpaB-like proteins are conserved across cyanobacterial and some plastid phylogenies45, their homologues in eukaryotic algae could potentially be targeted to enhance FL tolerance. However, because land plants lack phycobilisomes, RpaB-based tolerance is not feasible. Nevertheless, the rationale behind RpaB photoprotection could be mimicked by increasing the PSI/PSII ratio and downregulating antenna size.”

1.4 The authors conducted additional physiological and biochemical experiments on rpaBT183P, proposing that the mechanism underlying the high-light damage tolerance of rpaBT183P involves state transitions. The regulatory role of RpaB in state transitions has been previously documented, however, it remains puzzling that the state transition accounts for the FL tolerance. Furthermore, the authors performed RNA-Seq analysis, but the conclusions remain overly speculative without verifying whether this transcription factor actually binds to potential target genes. It is recommended that the authors conduct in vivo and in vitro binding assays to validate RpaB's interaction with its potential regulatory targets and use genetic experiments to confirm whether key target genes can rescue the observed phenotypes.

**Reply 1.4.** We agree that the experiments suggested by the reviewer are very interesting. However, we strongly believe that the manuscript is already very complex, not least because of the combined suggestions of the four reviewers. The RNA-Seq analysis aimed to relate the effects of the point mutation to the known target genes of RpaB, with no intention of claiming that the mutation changes affinities. This is clearly outside the scope of this manuscript, which presents a novel ALE-based approach to increasing FL tolerance and testing the impact of three representative mutations. Nevertheless, we have rephrased the relevant part of the Results and Discussion section to accommodate the suggestion of the reviewer and to take into account that the binding affinity of Rpab could have changed.

We write: “These findings suggest a complex response involving altered transcript accumulation as a consequence of the T183P substitution. This altered transcript accumulation could be due to an altered binding affinity of the mutated RpaB for its target genes, an altered target spectrum, or secondary changes to the transcriptome in response to the physiological effects of the mutation. Nevertheless, the mutation does not result in corresponding changes in protein levels with respect to the two photosystems, but it does with respect to phycobilisome-related genes.”

Later we write: “This suggests that RpaBT183P may have lost some of its PSI-gene activating activity under LL and some of its PSI-gene repressing activity under HL. At the same time, PsaA protein levels no longer directly reflect mRNA levels. Alternatively, the observed changes to the transcriptome may be independent of altered binding of the mutated RpaB to the corresponding genes and may instead represent compensatory effects due to the physiological changes triggered by the RpaBT183P mutation.”

Reviewer #2 (Comments for the Author):

The authors have revised their manuscript and addressed my concerns by performing more experiments. I don't have any concerns on the revised manuscript.

Reviewer #3 (Comments for the Author):

3.1. The manuscript has clearly improved. However, I am not convinced by the interpretation and presentation of the new photosynthetic parameters. I do not see strong evidence for an increase in CEF in the mutant; slow P700 oxidation alone is insufficient to support such a conclusion. Moreover, the involvement of Pgr5 in CEF in cyanobacteria remains contradictory.

**Reply 3.1.** We have removed the two cross-references to Synechocystis PGR5 in the context of CEF from the text. We have clarified that we measure P700 oxidation after prolonged dark incubation, as well as re-reduction, which provides together a proxy for assessing CEF activity. This method is described in the literature and is one that we routinely apply. See reply 3.3. Furthermore, CEF measurements represent only a minor part of the manuscript. In the context of PAM68, increased CEF is difficult to understand, and this is now mentioned explicitly in the manuscript.

3.2. L235 – paragraph. The description is not well phrased, and the conclusions are not correct. PSII activity per O₂ is slightly (but statistically significantly) lower in LL when normalized to OD. When normalized to chlorophyll, PSII activity is slightly higher, which suggests that the pam68 mutant has lower Chl/OD ratio. Fv/Fm is high in the mutant, but Fv/Fm in the LT control is surprisingly low. Please also add Fv/Fm values for FL0final. Instead of relative values, please show the actual O₂ evolution rates (or at least add them to the figure caption). In the Supplement, the units appear to be µmol/ml?/— is this correct?

**Reply 3.2**: We used the phrasing suggested by the reviewer to describe the PSII activity/oxygen evolution data and write now: “Under LL50, PSII activity, as measured as O2 evolution (see **Methods**), was slightly lower in *pam68S113G* than in LT when normalized to OD730nm, but slightly higher when normalized to Chl *a* (**Extended Data Fig. 6a**). This suggests that the *pam68S113G* mutant has a lower Chl *a*/OD730nm ratio.”

We added the Fv/Fm values for FL0final in **Supplementary Fig. S6c**. We added the actual O₂ evolution rates in the caption of **Supplementary Fig. S6a** and **b** and of **Supplementary Fig. S9a** and **b**.

3.3 P700 oxidation depends on many factors and cannot be directly interpreted as evidence for increased CEF. What about the re-reduction rate after the light is turned off? Perhaps the authors also recorded this parameter. I suggest that these conclusions be toned down.

**Reply 3.3:** We now also provide re-reduction in **Figures S6** and **S9**. We would like to highlight that the CEF measurements were performed following a prolonged dark incubation period, during which time respiratory donors were depleted. Therefore, these measurements can be taken as an indirect measure of CEF. We provide literature references for this. In the discussion, we have toned this down, particularly in view of the fact that increased PSII abundance/activity is difficult to reconcile with increased CEF. Nevertheless, since the data exist, we believe it is better to present and critically discuss them than to remove them.

3.4 L282 -> and corresponding Fig. Pls do not use PSI/PSII ratio (Ext Data 8). These are F695/F730 data. If 77Kspectra were normalized to P680 there would be perhaps no difference in F685/F730. What is the origin of the observed increase at F680? Is this related to IsiA accumulation?

**Reply 3.4:** As explained in the legend, PSI/PSII ratios are F725/F695 ratios. We believe this is more helpful to the reader than designating them as F725/F695 in the figure and explaining in the legend that they are used as proxies for PSI /PSII, rather than the other way around.

The ratios were obtained before the curves in panel a were normalised. This is mentioned in the legend. Therefore, the normalisation of these curves has no effect on the calculation of the ratios.

3.5. It is not clear how the authors derived PC/APC or PSII/APC ratios. I could not find 77K spectra where the PBS antenna was selectively excited to extract these parameters. I don’t think these values are correct or suitable for use in the paper.

**Reply 3.5:** The PC/APC or PSII/APC ratios were derived from 77K spectra, with an excitation wavelength of 600 nm. These data were initially included in the submission, but then removed in the revision. We are now supplying these data as Source Data 6 and explaining how we obtained the two ratios in the legend.

3.6. L300 - qN – in cyanobacteria OCP is responsible for NPQ and is active under high light. What other components contribute to qN under 50 uE?

**Reply 3.6:** In the FluorCam measurement, the qT component (state-transition-dependent quencing) is not singled out and therefore counted as qN. This can inflate the qN estimate in an OCP-independent manner, with the latter being unlikely to be triggered by the FluorCam orange-red actininc light. Dark-adapted Synechocystis cells should be primarily in state 1, but upon AL onset, state1→state2 transition due to PQ-Pool reduction comes with a fluorescence decrease appearing as “qN”. So any FL-mutation-dependent difference in state transition under 50 µE may cause a difference in detected "qN".‑1→state‑2

3.7 Mat and Met – P700 kinetics. Pls add important details – was FR used, intensity, was there dark acclimation? The current presentation in many places assumes that readers have carefully read the authors previous study. The measurement of Fv/Fm appears complicated (from plates ? ) - it was measured using FluorCam, while P700 was measured by Dual-PAM. Is there a specific reason for this? Fluorescence could be measured simulteniusly with P700.

**Reply 3.7:** We now provide a detailed chapter on P700 kinetics in the Methods section.

We used the FluorCam instead of the WALZ instrument to measure Fv/Fm because we had introduced measurements for isolating the monoclonal strains from streak outs on plates. To maintain consistency, we then used these methods for subsequent measurements. We actually re-measured the Fv/Fm values using our Dual PAM and found the same trends. However, to maintain consistency, we would prefer to keep the FluorCam measurements in the manuscript.

Reviewer #4 (Comments for the Author):

The authors responded to concerns from four reviewers and added a substantial amount of experimental results. I want to acknowledge their effort. However, the new information does not provide a direct answer to the mechanism of resistance, and I still do not see a clear story in this manuscript.

Specific comments

4.1) Reply R4.3. Although the authors focused on the small difference in growth phenotype between the oe and ins lines, I am unsure whether it can explain anything related to the mechanism of tolerance. If the accumulation of PSII and/or PSI is the underlying mechanism for the phenotype, it should also be analyzed in the ins0399 line.

**Reply 4.1:** We agree that the differences in growth between the four genotypes (LT, KO, OE and the point mutation line) are not very relevant when it comes to explaining the mechanism by which the point mutation facilitates FL tolerance. We have therefore removed the following sentence “This indicates that the pam68S113G mutation enhances FL tolerance similarly to WT Pam68 overexpression.”

We do not believe that including the KO line in the protein analyses would contribute to the study. The ideal way to address the effects of the mutation is to compare LT with the pam68S113G strain, which was derived from LT by exchanging just one nucleotide.

4.2) Extended Data Fig. 6d. I understand that the authors analyzed CEF in response to a reviewer's request. However, Pam68 is an assembly factor of PSII, and it is unclear how its increase affects CEF. If FR also partially activates PSII, increased PSII activity could also delay P700 oxidation. The results may just confuse readers.

**Reply 4.2:** We agree. In light of the fact that reviewer 3 also doubts the validity of the CEF data, it is tempting to remove them, but we feel that this would also be unscientific. Therefore, we have followed reviewer 3's suggestion to improve the CEF data by including the re-reduction period and by clarifying that P700 measurements were done after dark incubation to minimize respiratory interference. We have also toned down our discussion of the impact of the CEF and make clear that the apparent increase of CEF in the PAM68 mutant is difficult to understand.

4.3) Lines 385-388. In Arabidopsis, reduced PSII activity suppresses the sensitivity of PSI to FL in the pgr5 mutant background. This would be opposite to the observation in this work.

**Reply 4.3:** We agree and removed the corresponding passage from the discussion.

4.4) The authors predicted the impact of the mutations on the structure using alpha hold. This is okay. However, I want to understand how the mutation caused the phenotype and resistance to FL without significant conformational changes.

**Reply 4.4:** We share this wish with the reviewer. We want to follow up on the HOW in the future. However, we also believe that the fact a single point mutation can facilitate FL tolerance is a significant finding in itself, as it suggests the possibility of achieving FL tolerance through gene editing and altering individual amino acids rather than overexpressing one or more proteins. While this approach may not be applicable to mutations identified in cyanobacteria when introduced in plants, we are optimistic about extending our approach to green algae.

4.5) To demonstrate how finding can improve resistance in crops, the authors introduced WT and mutant genes isolated from Arabidopsis into cyanobacteria. Again, the readers are interested in how the same mutation affects resistance in angiosperms. The experiment should focus on the mutant proteins in Arabidopsis. The current results just confuse the story.

**Reply 4.5:** We actually found this experiment very informative. It demonstrates that the plant PAM68 protein can replace the cyanobacterial protein and that the same mutation in the plant protein has a different effect in the cyanobacterium. Therefore, the experiment requested by the reviewer, involving expressing the cyanobacterial wild-type and mutated proteins in a model plant, is unnecessary. Our experiment therefore allows us to conclude that the PAM68 mutation, which was found to increase FL tolerance in Synechocystis, is highly unlikely to be effective in plants.

4.6) I find it difficult to directly apply the story of Arabidopsis to cyanobacteria because there are significant differences in photoprotective mechanisms between organisms. For example, NDH has multiple functions in cyanobacteria and is not just involved in CEF.

**Reply 4.6:** We have toned down or removed references to NDH in the context of altered CEF rates from the manuscript.

4.7) The difference between the left and right panels should be explained in Fig. 4d.

**Reply 4.7:** We have now made clear that the two panels differ in the light condition used.
