# Supplementary material
Source: Research Square preprint supplement (doi:10.21203/rs.3.rs-6305715/v1)
Supplement: Supplementary file 2 [file 3ce711307e1a60264d04b8de.xlsx]

## Sheet: description
Supplemental Data 4. Original data from the characterisation of sll0518_A133V, pam68_S113G, rpaB_T183P, HL1, HL2 and HL1/2 under different light conditions.
Refers to Figure 3 and Extended Data Figures 2 and 3
abbreviation	meaning
IQR	interquartile range
nd	no data
Q1	first quartile (exclusive)
Q3	third quartile (exclusive)
SD	standard deviation

## Sheet: Fig_3b
Final OD730nm		FL0						FL+
		LT	sll0518_A133V	pam68_S113G	rpaB_T183P			LT	sll0518_A133V	pam68_S113G	rpaB_T183P
		0.234	0.514	0.548	0.242			0.196	0.15	0.106	1.425
		0.228	0.504	0.532	0.222			0.194	0.077	0.174	1.449
		0.246	0.488	0.596	0.254			0.188	0.133	0.168	1.294
		0.242	0.5	0.586	0.266			0.191	0.125	0.196	1.275
		0.28	0.588	0.54	0.224			0.169	0.092	0.169	1.208
		0.266	0.59	0.542	0.236			0.163	0.102	0.135	1.212
		0.208	0.554	0.7	0.338			0.173	0.12	0.132	1.209
		0.232	0.562	0.684	0.33			0.178	0.098	0.181	1.238
Bonferroni & Holm p value:		LT	sll0518_A133V	pam68_S113G	rpaB_T183P			LT	sll0518_A133V	pam68_S113G	rpaB_T183P
*** p≤0.001	LT		1.5792e-12	3.9968e-14	0.352901		LT		0.0401077	0.371176	0
** p≤0.01	sll0518_A133V	1.5792e-12		0.0585719	7.4181e-12		sll0518_A133V	0.0401077		0.188526	0
* p≤0.05	pam68_S113G	3.9968e-14	0.0585719		1.6875e-13		pam68_S113G	0.371176	0.188526		0
insignificant	rpaB_T183P	0.352901	7.4181e-12	1.6875e-13			rpaB_T183P	0	0	0
	Group superscript	A	B	B	A		Group superscript	A	B	AB	C
	Average	0.242	0.502	0.558667	0.239333		Average	0.1815	0.12	0.149333	1.38933
	SD	0.0225262	0.0131149	0.0333067	0.0161658		SD	0.0124327	0.0381969	0.0376475	0.0834286
	% to LT		2.07438	2.30854	0.988981		% to LT		0.661157	0.822773	7.65473
	Median	0.238	0.534	0.567	0.248		Median	0.183	0.111	0.1685	1.2565
	Q1	0.229	0.501	0.5405	0.227		Q1	0.17	0.0935	0.13275	1.20975
	Q3	0.261	0.5815	0.662	0.314		Q3	0.19325	0.131	0.17925	1.39225
	1.5×IQR	0.048	0.12075	0.18225	0.1305		1.5×IQR	0.034875	0.05625	0.06975	0.27375

## Sheet: Fig_3c
	under FL0																		under FL+
genotype	LT				sll0518_A133V				pam68_S113G				rpaB_T183P					genotype	LT				sll0518_A133V				pam68_S113G				rpaB_T183P
replicate #	1	2	3	4	1	2	3	4	1	2	3	4	1	2	3	4		replicate #	1	2	3	4	1	2	3	4	1	2	3	4	1	2	3	4
time[h]																		time[h]
0	0.056	0.051	0.047	0.045	0.04	0.057	0.05	0.038	0.063	0.054	0.067	0.058	0.057	0.051	0.043	0.051		0	0.049	0.056	0.051	0.008	0.052	0.043	0.043	0.041	0.051	0.054	0.061	0.053	0.035	0.007	0.028	0.058
0.25	0.054	0.048	0.046	0.044	0.035	0.055	0.049	0.035	0.062	0.052	0.067	0.057	0.056	0.05	0.041	0.05		1	0.051	0.053	0.053	0.011	0.06	0.044	0.044	0.046	0.051	0.055	0.062	0.055	0.019	0.034	0.031	0.057
0.5	0.056	0.051	0.05	0.048	0.039	0.056	0.05	0.039	0.063	0.054	0.068	0.06	0.057	0.053	0.043	0.052		2	0.054	0.056	0.055	0.015	0.055	0.043	0.043	0.044	0.052	0.058	0.065	0.058	0.023	0.036	0.035	0.062
0.75	0.057	0.051	0.05	0.046	0.04	0.055	0.05	0.04	0.062	0.054	0.068	0.061	0.058	0.053	0.043	0.053		3	0.056	0.058	0.058	0.017	0.066	0.048	0.048	0.055	0.054	0.061	0.068	0.06	0.026	0.038	0.038	0.064
1	0.057	0.051	0.051	0.047	0.038	0.055	0.052	0.04	0.063	0.055	0.068	0.06	0.058	0.054	0.044	0.054		4	0.062	0.061	0.063	0.022	0.069	0.05	0.051	0.059	0.057	0.066	0.07	0.063	0.032	0.043	0.042	0.068
1.25	0.057	0.051	0.05	0.046	0.04	0.055	0.05	0.039	0.062	0.054	0.068	0.059	0.058	0.053	0.044	0.053		5	0.065	0.063	0.066	0.027	0.067	0.051	0.053	0.059	0.06	0.068	0.073	0.065	0.036	0.046	0.047	0.072
1.5	0.058	0.051	0.05	0.046	0.04	0.055	0.05	0.038	0.063	0.054	0.068	0.059	0.058	0.053	0.044	0.053		6	0.067	0.065	0.066	0.03	0.074	0.053	0.057	0.065	0.062	0.071	0.076	0.068	0.039	0.049	0.048	0.074
1.75	0.057	0.051	0.048	0.045	0.039	0.055	0.049	0.037	0.063	0.052	0.068	0.058	0.058	0.052	0.044	0.052		7	0.068	0.066	0.068	0.032	0.079	0.054	0.059	0.071	0.065	0.075	0.078	0.07	0.042	0.052	0.05	0.077
2	0.057	0.051	0.047	0.044	0.038	0.054	0.049	0.036	0.063	0.053	0.068	0.058	0.057	0.051	0.043	0.053		8	0.071	0.068	0.072	0.035	0.074	0.053	0.059	0.067	0.068	0.077	0.08	0.073	0.047	0.054	0.053	0.078
2.25	0.056	0.05	0.047	0.042	0.037	0.054	0.049	0.036	0.063	0.053	0.068	0.057	0.056	0.051	0.043	0.051		9	0.074	0.07	0.074	0.039	0.076	0.055	0.061	0.07	0.068	0.079	0.083	0.075	0.05	0.057	0.055	0.082
2.5	0.055	0.05	0.048	0.043	0.036	0.054	0.049	0.036	0.063	0.053	0.068	0.058	0.056	0.051	0.043	0.053		10	0.077	0.073	0.076	0.041	0.084	0.058	0.065	0.078	0.072	0.082	0.084	0.077	0.055	0.059	0.058	0.085
2.75	0.056	0.05	0.049	0.044	0.038	0.054	0.05	0.038	0.062	0.053	0.068	0.059	0.057	0.052	0.043	0.054		11	0.078	0.075	0.078	0.045	0.085	0.061	0.066	0.079	0.073	0.085	0.086	0.079	0.058	0.062	0.061	0.087
3	0.06	0.053	0.052	0.045	0.041	0.056	0.05	0.04	0.063	0.055	0.069	0.06	0.058	0.053	0.045	0.055		12	0.081	0.076	0.079	0.046	0.084	0.057	0.066	0.077	0.073	0.088	0.089	0.082	0.06	0.064	0.062	0.089
3.25	0.059	0.053	0.051	0.042	0.04	0.055	0.051	0.04	0.063	0.055	0.069	0.06	0.057	0.053	0.044	0.056		13	0.082	0.077	0.081	0.048	0.088	0.06	0.068	0.08	0.075	0.089	0.091	0.084	0.063	0.066	0.064	0.09
3.5	0.061	0.053	0.051	0.042	0.043	0.056	0.051	0.04	0.064	0.055	0.069	0.06	0.058	0.053	0.045	0.056		14	0.082	0.077	0.082	0.05	0.089	0.061	0.069	0.083	0.076	0.088	0.091	0.083	0.065	0.067	0.064	0.092
3.75	0.06	0.052	0.049	0.042	0.041	0.055	0.05	0.038	0.063	0.053	0.069	0.059	0.057	0.052	0.045	0.054		15	0.082	0.078	0.083	0.051	0.092	0.063	0.071	0.086	0.079	0.091	0.092	0.084	0.068	0.068	0.065	0.094
4	0.058	0.052	0.049	0.041	0.039	0.055	0.049	0.037	0.064	0.054	0.07	0.058	0.057	0.053	0.044	0.054		16	0.081	0.077	0.081	0.051	0.087	0.061	0.07	0.081	0.079	0.091	0.093	0.085	0.068	0.067	0.065	0.093
4.25	0.057	0.052	0.048	0.041	0.039	0.054	0.049	0.037	0.063	0.053	0.07	0.058	0.056	0.05	0.044	0.054		17	0.081	0.078	0.083	0.052	0.085	0.059	0.068	0.076	0.084	0.093	0.095	0.087	0.071	0.07	0.065	0.095
4.5	0.058	0.051	0.049	0.04	0.038	0.055	0.048	0.037	0.063	0.054	0.069	0.058	0.056	0.051	0.044	0.054		18	0.08	0.078	0.08	0.052	0.089	0.061	0.071	0.082	0.083	0.094	0.096	0.089	0.073	0.07	0.064	0.095
4.75	0.059	0.051	0.049	0.041	0.038	0.055	0.049	0.037	0.064	0.054	0.07	0.058	0.056	0.051	0.045	0.055		19	0.079	0.079	0.081	0.052	0.093	0.061	0.071	0.085	0.087	0.095	0.098	0.089	0.076	0.071	0.066	0.097
5	0.061	0.054	0.052	0.042	0.041	0.057	0.051	0.04	0.065	0.055	0.07	0.06	0.058	0.053	0.046	0.056		20	0.079	0.08	0.081	0.053	0.09	0.06	0.07	0.08	0.086	0.096	0.098	0.091	0.078	0.074	0.066	0.097
5.25	0.061	0.054	0.052	0.042	0.043	0.058	0.052	0.04	0.065	0.055	0.071	0.061	0.058	0.053	0.046	0.057		21	0.081	0.081	0.082	0.078	0.092	0.06	0.072	0.082	0.088	0.096	0.099	0.09	0.08	0.075	0.066	0.103
5.5	0.064	0.055	0.054	0.043	0.044	0.059	0.052	0.042	0.065	0.057	0.071	0.062	0.059	0.054	0.047	0.059		22	0.084	0.084	0.084	0.083	0.093	0.057	0.073	0.081	0.09	0.097	0.1	0.092	0.083	0.079	0.07	0.108
5.75	0.064	0.055	0.054	0.043	0.044	0.059	0.053	0.043	0.066	0.057	0.072	0.063	0.06	0.055	0.048	0.059		23	0.086	0.084	0.085	0.082	0.087	0.053	0.069	0.075	0.091	0.099	0.102	0.094	0.086	0.081	0.071	0.109
6	0.063	0.055	0.053	0.042	0.044	0.058	0.052	0.041	0.065	0.058	0.072	0.063	0.06	0.054	0.047	0.058		24	0.084	0.085	0.085	0.082	0.096	0.056	0.074	0.082	0.09	0.101	0.103	0.095	0.087	0.084	0.073	0.111
6.25	0.062	0.055	0.05	0.041	0.042	0.058	0.051	0.04	0.066	0.055	0.072	0.061	0.059	0.053	0.047	0.057		25	0.084	0.084	0.084	0.082	0.095	0.057	0.076	0.084	0.093	0.104	0.105	0.097	0.09	0.086	0.073	0.112
6.5	0.061	0.055	0.051	0.04	0.042	0.057	0.051	0.04	0.066	0.056	0.072	0.061	0.058	0.054	0.048	0.058		26	0.086	0.086	0.087	0.084	0.095	0.056	0.077	0.085	0.095	0.108	0.107	0.101	0.092	0.09	0.077	0.116
6.75	0.06	0.055	0.051	0.041	0.041	0.057	0.05	0.04	0.066	0.056	0.072	0.061	0.058	0.052	0.047	0.058		27	0.091	0.089	0.092	0.087	0.102	0.058	0.081	0.089	0.097	0.111	0.11	0.102	0.099	0.094	0.082	0.123
7	0.063	0.055	0.051	0.04	0.042	0.058	0.051	0.039	0.066	0.056	0.072	0.061	0.058	0.053	0.047	0.057		28	0.093	0.091	0.093	0.09	0.103	0.06	0.08	0.091	0.098	0.113	0.112	0.104	0.103	0.098	0.087	0.127
7.25	0.064	0.055	0.053	0.042	0.043	0.058	0.052	0.041	0.066	0.056	0.073	0.062	0.06	0.054	0.048	0.059		29	0.095	0.093	0.096	0.092	0.104	0.059	0.081	0.092	0.098	0.115	0.114	0.107	0.106	0.102	0.09	0.13
7.5	0.066	0.057	0.054	0.044	0.045	0.06	0.054	0.043	0.067	0.058	0.073	0.064	0.061	0.056	0.049	0.06		30	0.099	0.094	0.097	0.094	0.105	0.06	0.084	0.094	0.101	0.119	0.115	0.109	0.11	0.106	0.094	0.133
7.75	0.063	0.057	0.057	0.045	0.043	0.06	0.056	0.044	0.067	0.059	0.073	0.065	0.061	0.056	0.049	0.062		31	0.1	0.096	0.099	0.094	0.098	0.058	0.081	0.089	0.101	0.12	0.117	0.11	0.113	0.108	0.096	0.136
8	0.065	0.057	0.056	0.045	0.045	0.06	0.055	0.043	0.068	0.059	0.074	0.065	0.061	0.057	0.049	0.061		32	0.101	0.096	0.101	0.095	0.107	0.061	0.085	0.096	0.101	0.122	0.12	0.112	0.117	0.112	0.099	0.139
8.25	0.064	0.057	0.054	0.044	0.044	0.06	0.054	0.043	0.067	0.059	0.074	0.064	0.06	0.055	0.049	0.06		33	0.104	0.1	0.102	0.097	0.106	0.062	0.084	0.095	0.103	0.125	0.121	0.115	0.121	0.115	0.105	0.143
8.5	0.066	0.057	0.055	0.043	0.045	0.06	0.054	0.043	0.068	0.058	0.075	0.064	0.06	0.055	0.049	0.06		34	0.106	0.102	0.104	0.099	0.109	0.062	0.086	0.098	0.103	0.126	0.123	0.121	0.126	0.12	0.106	0.147
8.75	0.065	0.056	0.052	0.041	0.044	0.061	0.053	0.041	0.068	0.059	0.075	0.063	0.06	0.054	0.049	0.059		35	0.108	0.102	0.104	0.101	0.107	0.06	0.085	0.097	0.103	0.128	0.125	0.124	0.13	0.124	0.112	0.152
9	0.066	0.057	0.054	0.042	0.043	0.06	0.054	0.042	0.068	0.059	0.074	0.063	0.06	0.055	0.049	0.06		36	0.109	0.104	0.106	0.103	0.109	0.063	0.088	0.099	0.105	0.132	0.127	0.126	0.133	0.129	0.114	0.154
9.25	0.065	0.057	0.054	0.043	0.044	0.06	0.054	0.042	0.069	0.058	0.075	0.064	0.063	0.055	0.049	0.06		37	0.112	0.105	0.106	0.104	0.11	0.062	0.088	0.1	0.105	0.132	0.129	0.127	0.137	0.13	0.118	0.158
9.5	0.068	0.059	0.056	0.044	0.047	0.061	0.056	0.044	0.07	0.059	0.077	0.065	0.064	0.056	0.05	0.061		38	0.11	0.106	0.107	0.105	0.115	0.064	0.089	0.104	0.105	0.134	0.129	0.129	0.14	0.137	0.118	0.161
9.75	0.068	0.059	0.056	0.044	0.048	0.062	0.056	0.044	0.07	0.06	0.077	0.067	0.063	0.057	0.051	0.062		39	0.11	0.107	0.107	0.105	0.113	0.063	0.087	0.102	0.106	0.137	0.131	0.128	0.142	0.138	0.123	0.162
10	0.069	0.061	0.058	0.045	0.049	0.062	0.057	0.046	0.071	0.06	0.078	0.067	0.064	0.057	0.052	0.063		40	0.108	0.106	0.105	0.104	0.113	0.061	0.09	0.1	0.108	0.135	0.13	0.131	0.144	0.14	0.123	0.166
10.25	0.07	0.061	0.059	0.046	0.05	0.063	0.058	0.046	0.071	0.061	0.078	0.068	0.065	0.058	0.053	0.065		41	0.108	0.105	0.105	0.103	0.114	0.061	0.09	0.102	0.107	0.137	0.131	0.133	0.149	0.143	0.126	0.17
10.5	0.069	0.06	0.058	0.046	0.049	0.062	0.057	0.046	0.07	0.061	0.077	0.067	0.063	0.057	0.052	0.063		42	0.108	0.106	0.104	0.103	0.114	0.063	0.09	0.103	0.109	0.138	0.133	0.131	0.152	0.146	0.127	0.171
10.75	0.068	0.06	0.057	0.046	0.049	0.062	0.057	0.044	0.07	0.061	0.078	0.067	0.064	0.058	0.052	0.063		43	0.107	0.108	0.106	0.105	0.114	0.064	0.089	0.103	0.11	0.139	0.134	0.132	0.154	0.149	0.13	0.173
11	0.068	0.06	0.056	0.044	0.047	0.062	0.056	0.045	0.07	0.061	0.077	0.066	0.063	0.057	0.051	0.063		44	0.108	0.108	0.105	0.103	0.116	0.062	0.091	0.105	0.11	0.139	0.135	0.133	0.157	0.155	0.132	0.175
11.25	0.069	0.06	0.056	0.044	0.047	0.061	0.056	0.044	0.071	0.062	0.078	0.067	0.064	0.056	0.052	0.062		45	0.107	0.109	0.105	0.104	0.115	0.063	0.092	0.105	0.111	0.142	0.136	0.134	0.161	0.157	0.135	0.18
11.5	0.068	0.06	0.055	0.044	0.045	0.062	0.056	0.043	0.072	0.061	0.079	0.066	0.064	0.057	0.052	0.062		46	0.106	0.108	0.104	0.105	0.114	0.062	0.089	0.102	0.111	0.143	0.137	0.135	0.164	0.16	0.139	0.18
11.75	0.068	0.062	0.057	0.046	0.048	0.062	0.057	0.045	0.072	0.062	0.08	0.067	0.065	0.058	0.052	0.064		47	0.108	0.109	0.106	0.105	0.115	0.062	0.089	0.103	0.11	0.141	0.138	0.135	0.17	0.164	0.143	0.186
12	0.068	0.061	0.06	0.048	0.048	0.062	0.06	0.049	0.071	0.064	0.079	0.069	0.065	0.06	0.053	0.065		48	0.11	0.11	0.108	0.106	0.112	0.061	0.089	0.101	0.111	0.143	0.137	0.137	0.175	0.17	0.147	0.19
12.25	0.07	0.062	0.06	0.048	0.05	0.064	0.058	0.048	0.072	0.064	0.08	0.07	0.065	0.06	0.053	0.067		49	0.109	0.111	0.108	0.105	0.119	0.065	0.093	0.107	0.111	0.146	0.14	0.139	0.177	0.172	0.15	0.196
12.5	0.072	0.064	0.061	0.049	0.053	0.065	0.061	0.05	0.073	0.064	0.081	0.072	0.066	0.061	0.055	0.068		50	0.111	0.112	0.11	0.106	0.119	0.062	0.091	0.107	0.112	0.146	0.142	0.139	0.18	0.177	0.156	0.2
12.75	0.072	0.063	0.059	0.047	0.051	0.066	0.058	0.048	0.074	0.063	0.081	0.069	0.066	0.06	0.055	0.066		51	0.113	0.113	0.112	0.108	0.117	0.064	0.091	0.106	0.112	0.148	0.142	0.141	0.186	0.184	0.159	0.2
13	0.071	0.062	0.059	0.047	0.05	0.064	0.059	0.048	0.073	0.063	0.08	0.07	0.066	0.059	0.053	0.067		52	0.117	0.114	0.111	0.109	0.116	0.063	0.091	0.108	0.11	0.148	0.142	0.142	0.192	0.188	0.164	0.208
13.25	0.071	0.062	0.057	0.045	0.05	0.065	0.058	0.047	0.073	0.063	0.081	0.068	0.067	0.059	0.054	0.065		53	0.121	0.118	0.114	0.113	0.121	0.064	0.095	0.112	0.111	0.149	0.144	0.145	0.199	0.194	0.171	0.216
13.5	0.07	0.062	0.058	0.045	0.048	0.065	0.058	0.047	0.074	0.064	0.081	0.07	0.067	0.06	0.054	0.066		54	0.121	0.118	0.116	0.114	0.119	0.066	0.096	0.113	0.112	0.151	0.146	0.145	0.204	0.198	0.173	0.216
13.75	0.072	0.063	0.058	0.048	0.049	0.065	0.057	0.046	0.074	0.064	0.082	0.069	0.067	0.059	0.054	0.066		55	0.126	0.12	0.118	0.115	0.119	0.064	0.097	0.112	0.111	0.153	0.145	0.146	0.21	0.206	0.18	0.221
14	0.073	0.065	0.062	0.048	0.051	0.065	0.061	0.048	0.074	0.065	0.082	0.072	0.067	0.062	0.054	0.068		56	0.127	0.121	0.122	0.117	0.121	0.065	0.096	0.115	0.113	0.154	0.147	0.146	0.216	0.209	0.187	0.227
14.25	0.075	0.066	0.062	0.049	0.052	0.066	0.06	0.05	0.076	0.066	0.082	0.072	0.068	0.063	0.057	0.069		57	0.128	0.122	0.122	0.118	0.124	0.065	0.096	0.116	0.112	0.154	0.148	0.147	0.218	0.213	0.189	0.234
14.5	0.076	0.066	0.063	0.05	0.052	0.067	0.062	0.051	0.076	0.067	0.084	0.074	0.068	0.063	0.057	0.071		58	0.129	0.122	0.12	0.119	0.123	0.066	0.096	0.118	0.111	0.156	0.149	0.149	0.223	0.218	0.196	0.235
14.75	0.075	0.066	0.063	0.05	0.051	0.067	0.061	0.051	0.076	0.066	0.084	0.073	0.07	0.063	0.057	0.07		59	0.13	0.123	0.124	0.12	0.12	0.065	0.098	0.115	0.109	0.157	0.15	0.148	0.229	0.224	0.198	0.238
15	0.075	0.066	0.062	0.049	0.05	0.066	0.062	0.049	0.076	0.067	0.085	0.073	0.07	0.062	0.056	0.07		60	0.134	0.124	0.125	0.122	0.123	0.068	0.097	0.119	0.113	0.156	0.149	0.149	0.236	0.227	0.202	0.246
15.25	0.074	0.065	0.059	0.047	0.047	0.065	0.061	0.047	0.076	0.066	0.084	0.072	0.069	0.062	0.055	0.068		61	0.134	0.127	0.126	0.123	0.124	0.069	0.099	0.12	0.108	0.157	0.15	0.15	0.243	0.233	0.21	0.251
15.5	0.074	0.066	0.061	0.048	0.046	0.066	0.06	0.048	0.077	0.066	0.085	0.072	0.07	0.063	0.056	0.069		62	0.132	0.125	0.125	0.122	0.125	0.069	0.099	0.12	0.11	0.158	0.151	0.151	0.249	0.235	0.215	0.255
15.75	0.074	0.065	0.06	0.048	0.05	0.065	0.059	0.047	0.076	0.067	0.085	0.072	0.07	0.061	0.056	0.068		63	0.134	0.127	0.127	0.124	0.119	0.066	0.097	0.116	0.109	0.158	0.151	0.151	0.255	0.239	0.219	0.258
16	0.075	0.066	0.061	0.049	0.05	0.065	0.06	0.047	0.078	0.067	0.085	0.072	0.07	0.062	0.057	0.07		64	0.134	0.126	0.126	0.123	0.125	0.069	0.098	0.123	0.109	0.161	0.154	0.152	0.262	0.245	0.222	0.265
16.25	0.076	0.068	0.062	0.05	0.05	0.068	0.061	0.048	0.078	0.068	0.086	0.074	0.07	0.063	0.058	0.071		65	0.132	0.127	0.126	0.124	0.118	0.065	0.097	0.115	0.107	0.159	0.154	0.15	0.266	0.251	0.228	0.269
16.5	0.078	0.068	0.065	0.052	0.051	0.067	0.062	0.051	0.079	0.068	0.086	0.076	0.071	0.064	0.059	0.071		66	0.132	0.127	0.126	0.124	0.123	0.066	0.098	0.118	0.106	0.16	0.153	0.153	0.271	0.257	0.233	0.272
16.75	0.078	0.069	0.064	0.052	0.053	0.067	0.062	0.05	0.079	0.069	0.087	0.076	0.072	0.064	0.059	0.072		67	0.132	0.127	0.125	0.122	0.113	0.063	0.095	0.111	0.107	0.161	0.152	0.153	0.276	0.259	0.234	0.277
17	0.078	0.07	0.067	0.053	0.052	0.067	0.064	0.052	0.081	0.071	0.086	0.078	0.072	0.066	0.06	0.075		68	0.13	0.126	0.125	0.123	0.12	0.066	0.098	0.117	0.105	0.16	0.154	0.154	0.283	0.263	0.241	0.282
17.25	0.077	0.069	0.065	0.051	0.05	0.068	0.062	0.05	0.08	0.07	0.087	0.076	0.073	0.065	0.06	0.072		69	0.13	0.126	0.123	0.122	0.115	0.063	0.096	0.112	0.104	0.162	0.158	0.154	0.288	0.268	0.244	0.288
17.5	0.075	0.068	0.064	0.051	0.05	0.066	0.063	0.051	0.078	0.07	0.087	0.075	0.071	0.065	0.058	0.073		70	0.131	0.128	0.125	0.123	0.118	0.065	0.097	0.115	0.107	0.16	0.156	0.155	0.296	0.276	0.25	0.291
17.75	0.076	0.067	0.063	0.05	0.047	0.067	0.061	0.049	0.078	0.069	0.087	0.074	0.07	0.063	0.057	0.072		71	0.132	0.127	0.125	0.125	0.12	0.067	0.099	0.118	0.106	0.16	0.157	0.157	0.302	0.279	0.258	0.299
18	0.075	0.068	0.063	0.05	0.047	0.068	0.061	0.048	0.08	0.07	0.088	0.075	0.072	0.063	0.059	0.073		72	0.131	0.128	0.126	0.125	0.118	0.066	0.098	0.118	0.106	0.159	0.156	0.158	0.307	0.285	0.261	0.302
18.25	0.074	0.069	0.063	0.051	0.047	0.067	0.061	0.048	0.08	0.069	0.087	0.075	0.071	0.064	0.058	0.071		73	0.133	0.129	0.127	0.126	0.12	0.066	0.1	0.117	0.105	0.16	0.158	0.16	0.318	0.29	0.267	0.311
18.5	0.075	0.068	0.065	0.051	0.048	0.068	0.062	0.051	0.081	0.071	0.088	0.075	0.071	0.064	0.059	0.073		74	0.135	0.129	0.129	0.127	0.117	0.065	0.099	0.116	0.107	0.164	0.16	0.159	0.322	0.298	0.274	0.315
18.75	0.075	0.069	0.066	0.053	0.048	0.067	0.064	0.052	0.081	0.072	0.088	0.077	0.074	0.066	0.059	0.074		75	0.138	0.131	0.13	0.128	0.123	0.068	0.102	0.123	0.108	0.164	0.159	0.16	0.33	0.303	0.28	0.319
19	0.078	0.07	0.066	0.053	0.049	0.068	0.064	0.052	0.082	0.072	0.09	0.077	0.074	0.066	0.06	0.075		76	0.141	0.134	0.132	0.132	0.126	0.068	0.102	0.124	0.109	0.163	0.162	0.164	0.34	0.312	0.287	0.329
19.25	0.078	0.07	0.067	0.054	0.052	0.068	0.064	0.054	0.082	0.072	0.089	0.078	0.074	0.066	0.06	0.076		77	0.143	0.135	0.135	0.135	0.127	0.068	0.104	0.126	0.107	0.164	0.162	0.164	0.346	0.316	0.297	0.335
19.5	0.08	0.071	0.069	0.055	0.052	0.068	0.065	0.054	0.082	0.073	0.09	0.08	0.076	0.068	0.062	0.077		78	0.147	0.136	0.137	0.134	0.121	0.066	0.103	0.122	0.11	0.17	0.163	0.163	0.354	0.326	0.304	0.34
19.75	0.079	0.07	0.068	0.053	0.052	0.069	0.063	0.054	0.082	0.073	0.089	0.078	0.075	0.065	0.062	0.076		79	0.146	0.135	0.137	0.136	0.127	0.069	0.105	0.128	0.107	0.167	0.161	0.163	0.362	0.333	0.308	0.348
20	0.08	0.071	0.067	0.053	0.054	0.069	0.063	0.052	0.083	0.072	0.09	0.078	0.075	0.065	0.061	0.076		80	0.147	0.137	0.136	0.137	0.124	0.07	0.105	0.126	0.107	0.169	0.163	0.164	0.366	0.339	0.314	0.356
20.25	0.079	0.07	0.065	0.052	0.052	0.068	0.062	0.051	0.084	0.072	0.091	0.077	0.074	0.067	0.061	0.075		81	0.147	0.137	0.138	0.136	0.128	0.07	0.107	0.131	0.107	0.171	0.162	0.167	0.375	0.347	0.322	0.363
20.5	0.08	0.072	0.064	0.052	0.052	0.068	0.062	0.05	0.084	0.072	0.091	0.076	0.076	0.066	0.062	0.074		82	0.149	0.137	0.137	0.138	0.13	0.073	0.107	0.13	0.107	0.168	0.161	0.165	0.383	0.352	0.329	0.367
20.75	0.08	0.07	0.067	0.06	0.049	0.069	0.063	0.07	0.079	0.07	0.091	0.082	0.074	0.069	0.061	0.078		83	0.151	0.138	0.14	0.138	0.129	0.072	0.106	0.131	0.107	0.167	0.161	0.166	0.392	0.358	0.335	0.375
21	0.081	0.071	0.067	0.06	0.052	0.069	0.065	0.069	0.08	0.07	0.091	0.082	0.074	0.071	0.061	0.079		84	0.15	0.138	0.138	0.137	0.13	0.071	0.108	0.133	0.107	0.165	0.161	0.166	0.398	0.363	0.343	0.38
21.25	0.081	0.071	0.068	0.061	0.051	0.069	0.066	0.07	0.081	0.071	0.092	0.082	0.075	0.072	0.062	0.079		85	0.151	0.137	0.139	0.139	0.131	0.07	0.11	0.134	0.106	0.166	0.16	0.167	0.408	0.37	0.348	0.39
21.5	0.085	0.072	0.071	0.063	0.055	0.071	0.067	0.072	0.081	0.072	0.093	0.085	0.077	0.072	0.065	0.082		86	0.151	0.139	0.14	0.138	0.125	0.068	0.105	0.127	0.107	0.168	0.16	0.165	0.418	0.379	0.355	0.396
21.75	0.087	0.073	0.071	0.063	0.056	0.072	0.066	0.07	0.081	0.073	0.094	0.083	0.077	0.073	0.064	0.081		87	0.151	0.141	0.139	0.139	0.125	0.066	0.105	0.127	0.106	0.169	0.162	0.168	0.424	0.387	0.363	0.405
22	0.084	0.072	0.071	0.063	0.055	0.072	0.066	0.071	0.081	0.072	0.093	0.084	0.078	0.072	0.064	0.081		88	0.152	0.14	0.14	0.139	0.13	0.07	0.109	0.133	0.107	0.168	0.16	0.168	0.435	0.396	0.371	0.411
22.25	0.085	0.073	0.068	0.062	0.054	0.072	0.065	0.07	0.08	0.072	0.094	0.083	0.076	0.071	0.064	0.081		89	0.151	0.139	0.14	0.138	0.129	0.067	0.109	0.129	0.105	0.166	0.161	0.168	0.442	0.401	0.375	0.419
22.5	0.083	0.073	0.067	0.061	0.053	0.071	0.065	0.068	0.081	0.071	0.092	0.083	0.077	0.071	0.063	0.081		90	0.149	0.138	0.138	0.139	0.121	0.066	0.105	0.122	0.104	0.166	0.16	0.168	0.45	0.408	0.383	0.424
22.75	0.082	0.073	0.067	0.062	0.052	0.071	0.065	0.068	0.082	0.071	0.094	0.083	0.077	0.07	0.064	0.081		91	0.149	0.14	0.138	0.137	0.129	0.067	0.107	0.129	0.103	0.167	0.16	0.17	0.459	0.415	0.389	0.43
23	0.081	0.073	0.069	0.062	0.052	0.071	0.066	0.069	0.082	0.072	0.093	0.084	0.076	0.072	0.064	0.081		92	0.147	0.139	0.138	0.138	0.128	0.068	0.11	0.128	0.104	0.165	0.161	0.169	0.466	0.423	0.395	0.438
23.25	0.083	0.074	0.071	0.062	0.053	0.072	0.066	0.07	0.083	0.073	0.094	0.085	0.077	0.073	0.064	0.082		93	0.147	0.139	0.137	0.137	0.126	0.066	0.109	0.126	0.1	0.165	0.161	0.168	0.475	0.431	0.402	0.443
23.5	0.084	0.074	0.07	0.064	0.055	0.073	0.067	0.071	0.084	0.073	0.095	0.085	0.079	0.074	0.065	0.083		94	0.149	0.139	0.137	0.136	0.128	0.066	0.108	0.125	0.103	0.165	0.161	0.169	0.484	0.436	0.408	0.451
23.75	0.083	0.075	0.072	0.064	0.053	0.074	0.068	0.072	0.083	0.074	0.096	0.086	0.08	0.075	0.065	0.084		95	0.148	0.139	0.137	0.136	0.125	0.064	0.109	0.121	0.103	0.165	0.161	0.169	0.493	0.445	0.414	0.458
24	0.087	0.075	0.073	0.066	0.057	0.074	0.068	0.074	0.084	0.075	0.096	0.088	0.079	0.075	0.066	0.084		96	0.149	0.139	0.138	0.137	0.124	0.064	0.107	0.121	0.102	0.162	0.16	0.17	0.502	0.454	0.423	0.469
24.25	0.083	0.075	0.072	0.065	0.054	0.072	0.068	0.072	0.084	0.074	0.096	0.087	0.079	0.075	0.067	0.084		97	0.149	0.14	0.138	0.139	0.126	0.063	0.109	0.123	0.101	0.163	0.16	0.168	0.511	0.459	0.431	0.476
24.5	0.084	0.075	0.071	0.063	0.055	0.073	0.069	0.07	0.083	0.073	0.096	0.086	0.079	0.073	0.066	0.085		98	0.151	0.142	0.139	0.14	0.127	0.066	0.11	0.126	0.105	0.167	0.164	0.17	0.52	0.469	0.439	0.485
24.75	0.085	0.074	0.07	0.063	0.053	0.073	0.067	0.07	0.083	0.073	0.096	0.085	0.078	0.073	0.066	0.083		99	0.152	0.141	0.139	0.141	0.134	0.067	0.111	0.131	0.104	0.167	0.163	0.171	0.531	0.478	0.447	0.492
25	0.084	0.073	0.07	0.063	0.055	0.072	0.067	0.071	0.083	0.073	0.096	0.087	0.08	0.073	0.065	0.083		100	0.154	0.145	0.142	0.143	0.137	0.068	0.113	0.133	0.105	0.168	0.16	0.17	0.542	0.487	0.457	0.503
25.25	0.085	0.074	0.069	0.063	0.056	0.072	0.067	0.07	0.083	0.073	0.097	0.087	0.08	0.072	0.066	0.083		101	0.157	0.144	0.142	0.144	0.136	0.07	0.113	0.133	0.106	0.17	0.162	0.172	0.552	0.498	0.466	0.514
25.5	0.086	0.074	0.071	0.065	0.058	0.073	0.069	0.071	0.085	0.074	0.097	0.088	0.079	0.073	0.067	0.085		102	0.158	0.146	0.144	0.144	0.135	0.069	0.114	0.133	0.104	0.17	0.162	0.172	0.562	0.506	0.475	0.523
25.75	0.086	0.077	0.073	0.064	0.056	0.073	0.069	0.072	0.086	0.076	0.098	0.089	0.082	0.073	0.068	0.086		103	0.161	0.145	0.145	0.145	0.134	0.068	0.114	0.132	0.105	0.169	0.163	0.173	0.572	0.516	0.484	0.531
26	0.085	0.076	0.074	0.067	0.057	0.074	0.07	0.074	0.086	0.076	0.099	0.09	0.081	0.077	0.068	0.087		104	0.164	0.147	0.144	0.146	0.13	0.068	0.113	0.131	0.107	0.17	0.161	0.175	0.58	0.524	0.494	0.539
26.25	0.085	0.076	0.073	0.066	0.057	0.072	0.069	0.074	0.086	0.076	0.099	0.089	0.081	0.076	0.068	0.086		105	0.162	0.147	0.144	0.147	0.14	0.069	0.117	0.135	0.106	0.17	0.162	0.174	0.589	0.533	0.499	0.549
26.5	0.087	0.077	0.076	0.066	0.061	0.073	0.072	0.075	0.087	0.077	0.099	0.092	0.083	0.076	0.069	0.088		106	0.163	0.15	0.146	0.147	0.137	0.07	0.117	0.131	0.106	0.17	0.162	0.176	0.598	0.54	0.509	0.558
26.75	0.086	0.076	0.073	0.066	0.056	0.072	0.07	0.073	0.087	0.077	0.099	0.091	0.082	0.076	0.068	0.086		107	0.163	0.149	0.147	0.146	0.133	0.069	0.116	0.131	0.105	0.17	0.163	0.174	0.609	0.55	0.517	0.565
27	0.084	0.076	0.073	0.065	0.056	0.073	0.07	0.072	0.087	0.077	0.1	0.09	0.082	0.074	0.068	0.086		108	0.163	0.148	0.148	0.147	0.137	0.066	0.116	0.133	0.105	0.17	0.163	0.175	0.62	0.557	0.526	0.576
27.25	0.083	0.075	0.072	0.065	0.053	0.073	0.068	0.072	0.087	0.077	0.099	0.09	0.081	0.075	0.067	0.086		109	0.164	0.149	0.147	0.147	0.14	0.071	0.119	0.135	0.106	0.169	0.162	0.173	0.629	0.566	0.534	0.583
27.5	0.087	0.075	0.071	0.064	0.057	0.073	0.069	0.072	0.087	0.077	0.1	0.091	0.081	0.074	0.068	0.085		110	0.165	0.148	0.148	0.147	0.141	0.07	0.119	0.137	0.105	0.169	0.162	0.174	0.64	0.576	0.543	0.592
27.75	0.085	0.076	0.072	0.064	0.055	0.073	0.07	0.073	0.088	0.077	0.1	0.091	0.081	0.075	0.068	0.086		111	0.164	0.148	0.147	0.148	0.143	0.073	0.121	0.138	0.106	0.168	0.16	0.176	0.65	0.585	0.552	0.6
28	0.086	0.077	0.075	0.067	0.058	0.073	0.071	0.075	0.088	0.079	0.1	0.092	0.083	0.077	0.069	0.088		112	0.163	0.149	0.146	0.148	0.137	0.071	0.119	0.131	0.105	0.171	0.162	0.178	0.661	0.592	0.559	0.609
28.25	0.087	0.078	0.076	0.068	0.06	0.075	0.072	0.076	0.087	0.079	0.102	0.094	0.083	0.078	0.07	0.089		113	0.162	0.148	0.144	0.147	0.135	0.068	0.119	0.127	0.104	0.167	0.161	0.175	0.671	0.6	0.568	0.616
28.5	0.089	0.079	0.076	0.067	0.06	0.076	0.073	0.075	0.09	0.08	0.103	0.094	0.083	0.077	0.071	0.09		114	0.162	0.151	0.164	0.149	0.132	0.067	0.117	0.123	0.104	0.167	0.161	0.175	0.68	0.606	0.574	0.624
28.75	0.091	0.08	0.077	0.069	0.063	0.077	0.074	0.078	0.09	0.08	0.103	0.095	0.085	0.08	0.072	0.09		115	0.162	0.152	0.164	0.147	0.131	0.065	0.116	0.126	0.103	0.164	0.16	0.175	0.689	0.615	0.584	0.632
29	0.091	0.079	0.076	0.067	0.062	0.076	0.073	0.076	0.09	0.08	0.102	0.094	0.084	0.078	0.072	0.09		116	0.161	0.15	0.164	0.146	0.121	0.062	0.114	0.119	0.102	0.163	0.16	0.175	0.699	0.62	0.59	0.639
29.25	0.087	0.078	0.074	0.066	0.062	0.077	0.072	0.074	0.09	0.079	0.103	0.093	0.084	0.078	0.071	0.089		117	0.16	0.15	0.164	0.147	0.129	0.066	0.115	0.122	0.102	0.162	0.159	0.174	0.71	0.633	0.598	0.645
29.5	0.087	0.078	0.075	0.066	0.06	0.077	0.072	0.075	0.09	0.079	0.103	0.094	0.085	0.076	0.072	0.09		118	0.16	0.151	0.164	0.146	0.122	0.061	0.113	0.115	0.103	0.164	0.16	0.175	0.718	0.642	0.608	0.656
29.75	0.088	0.079	0.075	0.067	0.061	0.076	0.073	0.075	0.091	0.08	0.104	0.094	0.085	0.078	0.072	0.089		119	0.159	0.152	0.164	0.146	0.125	0.062	0.114	0.119	0.102	0.162	0.163	0.174	0.728	0.65	0.615	0.664
30	0.088	0.079	0.076	0.067	0.06	0.077	0.073	0.075	0.09	0.08	0.104	0.094	0.084	0.078	0.072	0.089		120	0.159	0.148	0.164	0.147	0.124	0.062	0.116	0.117	0.104	0.163	0.16	0.176	0.74	0.658	0.622	0.674
30.25	0.087	0.079	0.078	0.068	0.061	0.079	0.075	0.076	0.091	0.081	0.106	0.095	0.085	0.079	0.073	0.09		121	0.162	0.15	0.164	0.148	0.131	0.064	0.118	0.122	0.102	0.163	0.159	0.175	0.752	0.67	0.632	0.681
30.5	0.091	0.08	0.079	0.068	0.065	0.078	0.076	0.079	0.091	0.082	0.105	0.098	0.085	0.08	0.074	0.091		122	0.164	0.149	0.164	0.147	0.126	0.062	0.116	0.118	0.105	0.166	0.163	0.176	0.761	0.681	0.641	0.691
30.75	0.087	0.081	0.079	0.07	0.061	0.078	0.075	0.079	0.091	0.082	0.105	0.097	0.085	0.08	0.074	0.093		123	0.163	0.151	0.164	0.149	0.137	0.07	0.122	0.131	0.106	0.171	0.164	0.179	0.774	0.692	0.652	0.702
31	0.09	0.081	0.08	0.071	0.064	0.079	0.077	0.079	0.092	0.082	0.106	0.098	0.086	0.082	0.074	0.093		124	0.167	0.153	0.164	0.15	0.134	0.071	0.122	0.13	0.105	0.169	0.164	0.18	0.787	0.703	0.662	0.71
31.25	0.09	0.079	0.078	0.068	0.062	0.078	0.075	0.078	0.092	0.082	0.105	0.097	0.087	0.08	0.073	0.092		125	0.168	0.155	0.164	0.151	0.139	0.072	0.124	0.133	0.106	0.17	0.164	0.18	0.799	0.713	0.672	0.721
31.5	0.087	0.079	0.076	0.068	0.06	0.077	0.074	0.078	0.092	0.082	0.105	0.097	0.085	0.079	0.073	0.093		126	0.171	0.153	0.164	0.153	0.139	0.071	0.122	0.131	0.106	0.169	0.164	0.18	0.812	0.724	0.684	0.732
31.75	0.086	0.081	0.077	0.067	0.059	0.077	0.074	0.076	0.092	0.081	0.106	0.097	0.085	0.079	0.073	0.091		127	0.171	0.157	0.164	0.153	0.134	0.07	0.122	0.128	0.108	0.17	0.166	0.181	0.821	0.734	0.693	0.74
32	0.087	0.08	0.076	0.068	0.059	0.077	0.075	0.076	0.093	0.082	0.106	0.097	0.085	0.08	0.072	0.091		128	0.173	0.156	0.164	0.152	0.137	0.073	0.124	0.132	0.105	0.17	0.164	0.181	0.831	0.744	0.7	0.749
32.25	0.087	0.08	0.076	0.067	0.059	0.078	0.076	0.077	0.093	0.083	0.108	0.098	0.086	0.08	0.073	0.092		129	0.172	0.155	0.164	0.154	0.143	0.075	0.126	0.136	0.107	0.171	0.165	0.181	0.843	0.755	0.71	0.759
32.5	0.092	0.083	0.078	0.071	0.065	0.08	0.076	0.08	0.095	0.084	0.108	0.099	0.089	0.081	0.076	0.094		130	0.172	0.157	0.164	0.153	0.14	0.073	0.125	0.131	0.109	0.172	0.164	0.184	0.853	0.765	0.719	0.768
32.75	0.091	0.083	0.081	0.072	0.064	0.081	0.079	0.081	0.096	0.086	0.109	0.101	0.089	0.084	0.076	0.097		131	0.172	0.157	0.164	0.153	0.145	0.076	0.129	0.139	0.109	0.173	0.163	0.182	0.865	0.776	0.73	0.777
33	0.09	0.082	0.083	0.071	0.063	0.079	0.079	0.083	0.096	0.086	0.108	0.102	0.088	0.084	0.075	0.097		132	0.174	0.156	0.164	0.154	0.144	0.074	0.127	0.135	0.108	0.172	0.166	0.182	0.877	0.787	0.738	0.786
33.25	0.092	0.083	0.08	0.071	0.065	0.081	0.08	0.082	0.097	0.085	0.11	0.102	0.089	0.083	0.077	0.095		133	0.174	0.156	0.164	0.151	0.145	0.076	0.128	0.135	0.109	0.17	0.165	0.182	0.886	0.795	0.748	0.795
33.5	0.091	0.083	0.079	0.069	0.065	0.081	0.078	0.08	0.095	0.085	0.11	0.102	0.089	0.082	0.077	0.095		134	0.172	0.157	0.164	0.155	0.145	0.075	0.127	0.134	0.107	0.173	0.164	0.181	0.894	0.803	0.755	0.804
33.75	0.088	0.082	0.078	0.07	0.063	0.079	0.078	0.079	0.095	0.084	0.11	0.102	0.087	0.08	0.076	0.095		135	0.175	0.157	0.164	0.152	0.139	0.072	0.126	0.127	0.108	0.172	0.164	0.182	0.907	0.814	0.765	0.815
34	0.09	0.082	0.079	0.069	0.064	0.08	0.078	0.081	0.097	0.086	0.11	0.103	0.089	0.082	0.076	0.096		136	0.174	0.155	0.164	0.153	0.142	0.073	0.127	0.129	0.107	0.175	0.164	0.182	0.915	0.824	0.774	0.822
34.25	0.09	0.082	0.079	0.068	0.062	0.08	0.077	0.079	0.096	0.085	0.111	0.101	0.088	0.08	0.076	0.094		137	nd	nd	nd	nd	0.138	0.068	0.124	0.124	0.108	0.173	0.165	0.182	nd	nd	nd	nd
34.5	0.089	0.081	0.08	0.07	0.062	0.079	0.079	0.081	0.096	0.087	0.111	0.103	0.088	0.082	0.076	0.096		138	nd	nd	nd	nd	0.139	0.071	0.127	0.127	0.106	0.171	0.164	0.183	nd	nd	nd	nd
34.75	0.091	0.082	0.082	0.073	0.067	0.083	0.082	0.084	0.098	0.089	0.113	0.105	0.089	0.084	0.077	0.098		139	nd	nd	nd	nd	0.135	0.066	0.126	0.12	0.104	0.17	0.164	0.182	nd	nd	nd	nd
35	0.095	0.087	0.084	0.073	0.069	0.084	0.083	0.085	0.098	0.089	0.112	0.106	0.09	0.087	0.079	0.1		140	nd	nd	nd	nd	0.138	0.069	0.126	0.122	0.107	0.168	0.165	0.182	nd	nd	nd	nd
35.25	0.092	0.085	0.082	0.072	0.068	0.083	0.082	0.083	0.099	0.089	0.113	0.106	0.091	0.085	0.08	0.099		141	nd	nd	nd	nd	0.14	0.07	0.126	0.122	0.106	0.168	0.165	0.181	nd	nd	nd	nd
35.5	0.091	0.083	0.081	0.071	0.067	0.082	0.081	0.082	0.099	0.089	0.113	0.104	0.09	0.084	0.079	0.098		142	nd	nd	nd	nd	0.142	0.071	0.127	0.123	0.103	0.168	0.165	0.184	nd	nd	nd	nd
35.75	0.091	0.084	0.08	0.072	0.066	0.082	0.082	0.083	0.099	0.088	0.112	0.105	0.089	0.084	0.078	0.098		143	nd	nd	nd	nd	0.137	0.068	0.124	0.119	0.103	0.168	0.165	0.183	nd	nd	nd	nd
36	0.091	0.084	0.082	0.072	0.066	0.082	0.081	0.082	0.099	0.088	0.114	0.105	0.089	0.084	0.078	0.098		144	nd	nd	nd	nd	0.136	0.067	0.126	0.117	0.105	0.167	0.164	0.183	nd	nd	nd	nd
36.25	0.09	0.084	0.08	0.071	0.066	0.082	0.08	0.081	0.099	0.088	0.114	0.105	0.088	0.084	0.078	0.098		145	nd	nd	nd	nd	0.137	0.071	0.125	0.12	0.104	0.169	0.165	0.184	nd	nd	nd	nd
36.5	0.092	0.083	0.08	0.072	0.066	0.084	0.082	0.082	0.1	0.089	0.115	0.105	0.09	0.084	0.08	0.098		146	nd	nd	nd	nd	0.139	0.072	0.126	0.119	0.108	0.171	0.165	0.187	nd	nd	nd	nd
36.75	0.09	0.083	0.079	0.071	0.064	0.082	0.081	0.081	0.099	0.089	0.115	0.105	0.09	0.083	0.078	0.098		147	nd	nd	nd	nd	0.142	0.074	0.127	0.122	0.106	0.172	0.165	0.187	nd	nd	nd	nd
37	0.09	0.084	0.082	0.073	0.066	0.083	0.082	0.084	0.1	0.089	0.115	0.107	0.091	0.084	0.078	0.1		148	nd	nd	nd	nd	0.148	0.079	0.13	0.13	0.108	0.174	0.167	0.185	nd	nd	nd	nd
37.25	0.094	0.085	0.083	0.075	0.069	0.085	0.084	0.085	0.101	0.09	0.115	0.109	0.091	0.086	0.08	0.101		149	nd	nd	nd	nd	0.145	0.078	0.131	0.128	0.107	0.175	0.166	0.19	nd	nd	nd	nd
37.5	0.097	0.086	0.087	0.08	0.072	0.086	0.086	0.088	0.103	0.093	0.117	0.111	0.094	0.087	0.082	0.102		150	nd	nd	nd	nd	0.146	0.077	0.133	0.129	0.11	0.176	0.166	0.189	nd	nd	nd	nd
37.75	0.092	0.087	0.085	0.08	0.068	0.086	0.084	0.088	0.103	0.092	0.118	0.11	0.092	0.087	0.081	0.101		151	nd	nd	nd	nd	0.149	0.077	0.133	0.129	0.108	0.174	0.166	0.191	nd	nd	nd	nd
38	0.097	0.087	0.087	0.08	0.074	0.087	0.086	0.088	0.103	0.094	0.119	0.111	0.093	0.089	0.083	0.103		152	nd	nd	nd	nd	0.152	0.079	0.132	0.133	0.108	0.175	0.166	0.193	nd	nd	nd	nd
38.25	0.096	0.086	0.085	0.079	0.071	0.087	0.086	0.087	0.103	0.094	0.118	0.111	0.093	0.088	0.083	0.103		153	nd	nd	nd	nd	0.155	0.079	0.135	0.134	0.109	0.174	0.171	0.191	nd	nd	nd	nd
38.5	0.096	0.087	0.084	0.079	0.071	0.086	0.085	0.087	0.103	0.093	0.118	0.109	0.093	0.087	0.082	0.102		154	nd	nd	nd	nd	0.156	0.081	0.136	0.136	0.11	0.176	0.168	0.191	nd	nd	nd	nd
38.75	0.095	0.087	0.082	0.079	0.072	0.087	0.085	0.086	0.104	0.092	0.118	0.109	0.092	0.087	0.083	0.102		155	nd	nd	nd	nd	0.15	0.076	0.132	0.129	0.11	0.177	0.168	0.193	nd	nd	nd	nd
39	0.095	0.087	0.083	0.077	0.071	0.086	0.085	0.086	0.102	0.093	0.117	0.11	0.093	0.086	0.083	0.102		156	nd	nd	nd	nd	0.153	0.082	0.135	0.135	0.109	0.176	0.167	0.193	nd	nd	nd	nd
39.25	0.094	0.086	0.082	0.077	0.071	0.086	0.084	0.085	0.103	0.092	0.119	0.11	0.093	0.086	0.083	0.101		157	nd	nd	nd	nd	0.15	0.078	0.135	0.132	0.108	0.176	0.167	0.193	nd	nd	nd	nd
39.5	0.093	0.085	0.085	0.079	0.069	0.086	0.087	0.088	0.105	0.094	0.118	0.112	0.092	0.087	0.083	0.103		158	nd	nd	nd	nd	0.151	0.079	0.134	0.13	0.108	0.176	0.167	0.195	nd	nd	nd	nd
39.75	0.094	0.088	0.085	0.08	0.073	0.088	0.088	0.089	0.105	0.095	0.121	0.113	0.094	0.088	0.084	0.104		159	nd	nd	nd	nd	0.155	0.079	0.136	0.137	0.11	0.176	0.169	0.194	nd	nd	nd	nd
40	0.095	0.089	0.086	0.081	0.074	0.088	0.088	0.09	0.106	0.096	0.121	0.115	0.095	0.089	0.086	0.104		160	nd	nd	nd	nd	0.152	0.077	0.135	0.131	0.109	0.174	0.168	0.195	nd	nd	nd	nd
40.25	0.099	0.088	0.088	0.082	0.076	0.09	0.089	0.092	0.107	0.097	0.121	0.115	0.096	0.09	0.086	0.107		161	nd	nd	nd	nd	0.154	0.077	0.135	0.133	0.108	0.176	0.168	0.196	nd	nd	nd	nd
40.5	0.098	0.089	0.088	0.083	0.075	0.089	0.09	0.092	0.106	0.097	0.121	0.116	0.097	0.089	0.085	0.108		162	nd	nd	nd	nd	0.153	0.076	0.134	0.13	0.109	0.173	0.168	0.196	nd	nd	nd	nd
40.75	0.096	0.089	0.087	0.081	0.074	0.089	0.089	0.09	0.106	0.096	0.122	0.115	0.095	0.088	0.085	0.106
41	0.097	0.088	0.086	0.081	0.074	0.089	0.089	0.09	0.106	0.097	0.122	0.115	0.096	0.089	0.086	0.105
41.25	0.098	0.09	0.085	0.08	0.074	0.089	0.089	0.09	0.106	0.098	0.123	0.116	0.097	0.088	0.084	0.106
41.5	0.097	0.088	0.085	0.08	0.074	0.09	0.089	0.09	0.107	0.097	0.123	0.115	0.096	0.088	0.085	0.105
41.75	0.097	0.089	0.085	0.079	0.074	0.09	0.089	0.089	0.107	0.097	0.123	0.114	0.096	0.087	0.086	0.105
42	0.098	0.089	0.088	0.081	0.075	0.09	0.091	0.091	0.108	0.099	0.123	0.117	0.097	0.09	0.087	0.107
42.25	0.097	0.089	0.087	0.082	0.075	0.09	0.092	0.091	0.109	0.098	0.123	0.117	0.097	0.09	0.087	0.108
42.5	0.097	0.091	0.09	0.083	0.076	0.091	0.093	0.094	0.109	0.1	0.125	0.119	0.097	0.091	0.088	0.111
42.75	0.1	0.09	0.089	0.082	0.078	0.092	0.093	0.093	0.109	0.1	0.125	0.119	0.098	0.091	0.088	0.11
43	0.099	0.09	0.089	0.084	0.078	0.092	0.093	0.088	0.109	0.101	0.125	0.117	0.096	0.09	0.099	0.113
43.25	0.097	0.089	0.088	0.081	0.076	0.091	0.093	0.086	0.109	0.1	0.124	0.117	0.097	0.091	0.099	0.113
43.5	0.097	0.09	0.087	0.082	0.077	0.091	0.092	0.086	0.11	0.1	0.126	0.117	0.097	0.089	0.099	0.112
43.75	0.096	0.089	0.086	0.081	0.074	0.091	0.092	0.086	0.11	0.1	0.125	0.118	0.095	0.089	0.098	0.114
44	0.096	0.089	0.087	0.082	0.076	0.091	0.091	0.088	0.11	0.1	0.126	0.117	0.096	0.088	0.098	0.112
44.25	0.096	0.089	0.09	0.082	0.076	0.091	0.094	0.088	0.111	0.102	0.127	0.119	0.096	0.09	0.098	0.114
44.5	0.098	0.09	0.09	0.085	0.076	0.092	0.096	0.089	0.111	0.103	0.128	0.119	0.098	0.092	0.099	0.115
44.75	0.098	0.09	0.088	0.084	0.077	0.092	0.094	0.088	0.11	0.103	0.127	0.12	0.098	0.09	0.1	0.114
45	0.098	0.09	0.091	0.085	0.079	0.094	0.095	0.089	0.113	0.104	0.128	0.12	0.098	0.092	0.1	0.115
45.25	0.099	0.092	0.091	0.085	0.078	0.094	0.096	0.091	0.113	0.104	0.129	0.122	0.099	0.092	0.101	0.117
45.5	0.102	0.092	0.09	0.085	0.083	0.095	0.095	0.09	0.113	0.103	0.128	0.121	0.1	0.091	0.101	0.116
45.75	0.103	0.093	0.092	0.086	0.081	0.096	0.096	0.091	0.113	0.105	0.13	0.123	0.1	0.092	0.104	0.118
46	0.102	0.094	0.093	0.086	0.083	0.096	0.098	0.093	0.114	0.105	0.131	0.123	0.1	0.093	0.103	0.119
46.25	0.099	0.092	0.092	0.087	0.08	0.095	0.097	0.091	0.115	0.106	0.13	0.123	0.1	0.092	0.103	0.117
46.5	0.1	0.094	0.092	0.086	0.08	0.095	0.099	0.092	0.115	0.105	0.13	0.124	0.1	0.093	0.101	0.117
46.75	0.098	0.093	0.09	0.085	0.078	0.094	0.098	0.09	0.115	0.105	0.131	0.123	0.098	0.092	0.1	0.118
47	0.1	0.094	0.089	0.084	0.079	0.095	0.097	0.09	0.115	0.105	0.131	0.123	0.099	0.092	0.102	0.116
47.25	0.099	0.093	0.088	0.084	0.079	0.094	0.097	0.09	0.115	0.107	0.131	0.122	0.098	0.092	0.102	0.116
47.5	0.099	0.093	0.091	0.085	0.079	0.095	0.097	0.091	0.116	0.107	0.132	0.123	0.1	0.092	0.102	0.118
47.75	0.101	0.094	0.091	0.087	0.079	0.096	0.099	0.093	0.116	0.108	0.134	0.124	0.1	0.093	0.103	0.118
48	0.103	0.097	0.092	0.088	0.084	0.097	0.101	0.094	0.118	0.108	0.133	0.126	0.102	0.094	0.105	0.12
48.25	0.103	0.096	0.093	0.087	0.084	0.099	0.102	0.095	0.118	0.109	0.134	0.126	0.102	0.094	0.105	0.121
48.5	0.104	0.098	0.093	0.087	0.085	0.098	0.101	0.096	0.119	0.109	0.134	0.128	0.103	0.095	0.106	0.122
48.75	0.104	0.097	0.093	0.087	0.085	0.099	0.1	0.095	0.119	0.11	0.135	0.129	0.102	0.093	0.105	0.121
49	0.107	0.098	0.096	0.087	0.088	0.1	0.103	0.095	0.119	0.11	0.136	0.129	0.103	0.095	0.106	0.121
49.25	0.107	0.096	0.097	0.088	0.089	0.102	0.103	0.095	0.12	0.111	0.137	0.13	0.105	0.096	0.107	0.123
49.5	0.106	0.097	0.097	0.092	0.087	0.101	0.103	0.096	0.12	0.112	0.136	0.131	0.104	0.095	0.106	0.123
49.75	0.103	0.096	0.095	0.091	0.085	0.101	0.103	0.096	0.12	0.111	0.136	0.13	0.102	0.095	0.105	0.122
50	0.103	0.096	0.094	0.092	0.085	0.099	0.104	0.096	0.12	0.111	0.137	0.13	0.102	0.095	0.105	0.123
50.25	0.101	0.097	0.092	0.09	0.083	0.098	0.102	0.094	0.12	0.111	0.138	0.13	0.103	0.094	0.105	0.123
50.5	0.101	0.094	0.092	0.091	0.083	0.099	0.102	0.095	0.12	0.111	0.136	0.131	0.102	0.094	0.104	0.121
50.75	0.101	0.095	0.093	0.088	0.083	0.1	0.102	0.094	0.121	0.111	0.137	0.13	0.102	0.093	0.105	0.122
51	0.101	0.095	0.092	0.09	0.084	0.1	0.103	0.096	0.123	0.113	0.138	0.13	0.102	0.096	0.106	0.123
51.25	0.102	0.095	0.094	0.091	0.085	0.102	0.103	0.097	0.121	0.113	0.139	0.131	0.104	0.096	0.106	0.124
51.5	0.104	0.1	0.097	0.091	0.086	0.102	0.104	0.098	0.123	0.114	0.139	0.134	0.104	0.096	0.108	0.124
51.75	0.104	0.099	0.097	0.093	0.088	0.102	0.106	0.099	0.124	0.114	0.142	0.135	0.104	0.096	0.107	0.125
52	0.105	0.1	0.097	0.093	0.088	0.102	0.107	0.101	0.124	0.115	0.141	0.135	0.104	0.097	0.107	0.126
52.25	0.104	0.1	0.096	0.093	0.088	0.103	0.106	0.099	0.124	0.116	0.141	0.134	0.105	0.096	0.109	0.125
52.5	0.107	0.1	0.1	0.095	0.092	0.105	0.108	0.102	0.124	0.117	0.143	0.137	0.106	0.099	0.11	0.128
52.75	0.108	0.103	0.098	0.094	0.093	0.104	0.108	0.101	0.125	0.117	0.143	0.136	0.106	0.098	0.11	0.127
53	0.108	0.102	0.098	0.095	0.093	0.105	0.108	0.101	0.125	0.116	0.143	0.136	0.106	0.099	0.11	0.129
53.25	0.106	0.102	0.099	0.093	0.09	0.105	0.108	0.101	0.126	0.117	0.143	0.137	0.105	0.097	0.109	0.128
53.5	0.107	0.102	0.097	0.094	0.091	0.105	0.108	0.101	0.126	0.117	0.144	0.137	0.107	0.098	0.11	0.128
53.75	0.105	0.099	0.096	0.093	0.088	0.104	0.109	0.1	0.126	0.116	0.144	0.137	0.106	0.098	0.109	0.128
54	0.106	0.102	0.096	0.092	0.091	0.105	0.108	0.1	0.127	0.118	0.144	0.137	0.106	0.096	0.11	0.126
54.25	0.104	0.102	0.095	0.093	0.089	0.103	0.107	0.1	0.126	0.117	0.144	0.137	0.104	0.097	0.109	0.127
54.5	0.105	0.101	0.096	0.09	0.093	0.105	0.108	0.1	0.127	0.117	0.145	0.138	0.105	0.096	0.11	0.127
54.75	0.106	0.103	0.097	0.095	0.09	0.105	0.11	0.103	0.128	0.119	0.145	0.14	0.105	0.098	0.11	0.129
55	0.105	0.1	0.1	0.095	0.091	0.105	0.112	0.105	0.128	0.119	0.146	0.141	0.106	0.1	0.111	0.13
55.25	0.107	0.103	0.099	0.095	0.091	0.105	0.11	0.105	0.129	0.121	0.147	0.142	0.106	0.1	0.111	0.131
55.5	0.109	0.104	0.101	0.096	0.096	0.109	0.112	0.106	0.132	0.122	0.149	0.142	0.109	0.1	0.112	0.132
55.75	0.11	0.103	0.098	0.096	0.094	0.108	0.112	0.106	0.13	0.121	0.148	0.142	0.109	0.1	0.113	0.13
56	0.111	0.103	0.102	0.096	0.097	0.108	0.113	0.108	0.131	0.123	0.149	0.144	0.11	0.101	0.114	0.133
56.25	0.11	0.104	0.1	0.096	0.096	0.108	0.112	0.106	0.131	0.123	0.15	0.144	0.109	0.099	0.113	0.132
56.5	0.112	0.105	0.102	0.097	0.099	0.11	0.114	0.108	0.132	0.124	0.152	0.146	0.11	0.102	0.115	0.133
56.75	0.111	0.104	0.101	0.099	0.097	0.11	0.113	0.107	0.132	0.123	0.15	0.145	0.11	0.101	0.114	0.132
57	0.111	0.105	0.101	0.098	0.098	0.109	0.114	0.107	0.132	0.123	0.152	0.146	0.11	0.101	0.115	0.133
57.25	0.109	0.105	0.099	0.096	0.095	0.108	0.113	0.106	0.133	0.124	0.152	0.144	0.109	0.099	0.114	0.132
57.5	0.109	0.103	0.1	0.096	0.095	0.109	0.114	0.106	0.134	0.124	0.152	0.146	0.109	0.1	0.115	0.134
57.75	0.108	0.103	0.099	0.096	0.094	0.109	0.113	0.106	0.133	0.125	0.152	0.145	0.108	0.099	0.113	0.134
58	0.11	0.103	0.098	0.096	0.095	0.109	0.115	0.107	0.134	0.126	0.153	0.147	0.11	0.1	0.115	0.133
58.25	0.111	0.103	0.099	0.095	0.097	0.11	0.116	0.107	0.135	0.125	0.153	0.147	0.11	0.1	0.115	0.132
58.5	0.112	0.104	0.102	0.097	0.097	0.111	0.117	0.109	0.134	0.126	0.154	0.148	0.11	0.1	0.114	0.133
58.75	0.112	0.105	0.1	0.096	0.099	0.112	0.117	0.11	0.136	0.126	0.155	0.148	0.111	0.101	0.116	0.134
59	0.113	0.106	0.102	0.096	0.101	0.113	0.12	0.111	0.136	0.127	0.155	0.15	0.112	0.101	0.116	0.136
59.25	0.113	0.106	0.105	0.099	0.102	0.113	0.121	0.114	0.137	0.128	0.157	0.152	0.111	0.102	0.118	0.137
59.5	0.114	0.108	0.104	0.097	0.103	0.115	0.119	0.113	0.137	0.129	0.157	0.151	0.113	0.102	0.119	0.138
59.75	0.114	0.108	0.106	0.1	0.104	0.115	0.12	0.114	0.139	0.129	0.159	0.152	0.113	0.102	0.118	0.139
60	0.115	0.108	0.105	0.101	0.102	0.115	0.121	0.113	0.139	0.131	0.158	0.154	0.113	0.104	0.118	0.14
60.25	0.114	0.106	0.107	0.1	0.103	0.115	0.122	0.116	0.139	0.13	0.16	0.154	0.113	0.105	0.118	0.14
60.5	0.114	0.11	0.107	0.101	0.104	0.115	0.122	0.116	0.14	0.133	0.16	0.156	0.115	0.106	0.119	0.14
60.75	0.115	0.109	0.106	0.099	0.102	0.115	0.122	0.114	0.14	0.131	0.163	0.155	0.113	0.104	0.119	0.139
61	0.114	0.108	0.105	0.1	0.102	0.115	0.121	0.113	0.14	0.131	0.16	0.155	0.113	0.104	0.117	0.139
61.25	0.114	0.109	0.104	0.097	0.102	0.117	0.12	0.113	0.141	0.131	0.16	0.154	0.113	0.104	0.118	0.139
61.5	0.113	0.108	0.105	0.098	0.101	0.116	0.121	0.113	0.141	0.132	0.161	0.154	0.112	0.104	0.118	0.139
61.75	0.111	0.107	0.102	0.097	0.099	0.115	0.12	0.113	0.14	0.132	0.161	0.155	0.114	0.103	0.118	0.139
62	0.111	0.107	0.103	0.098	0.101	0.115	0.12	0.112	0.141	0.132	0.161	0.156	0.113	0.104	0.12	0.138
62.25	0.11	0.107	0.102	0.098	0.1	0.116	0.121	0.112	0.141	0.132	0.161	0.156	0.113	0.102	0.118	0.138
62.5	0.112	0.108	0.104	0.097	0.1	0.116	0.121	0.113	0.143	0.132	0.162	0.157	0.111	0.103	0.118	0.14
62.75	0.116	0.108	0.106	0.099	0.104	0.117	0.124	0.116	0.144	0.135	0.165	0.158	0.114	0.106	0.119	0.142
63	0.118	0.109	0.108	0.099	0.105	0.119	0.127	0.118	0.144	0.135	0.164	0.16	0.116	0.107	0.121	0.144
63.25	0.116	0.107	0.107	0.101	0.106	0.119	0.128	0.12	0.144	0.136	0.164	0.162	0.115	0.107	0.122	0.143
63.5	0.119	0.11	0.108	0.102	0.109	0.12	0.128	0.118	0.145	0.137	0.166	0.162	0.117	0.107	0.123	0.144
63.75	0.119	0.11	0.109	0.101	0.11	0.122	0.127	0.12	0.146	0.137	0.168	0.163	0.117	0.107	0.124	0.145
64	0.122	0.11	0.111	0.102	0.111	0.122	0.129	0.121	0.148	0.139	0.167	0.164	0.118	0.107	0.124	0.148
64.25	0.12	0.113	0.11	0.104	0.113	0.124	0.13	0.121	0.147	0.139	0.169	0.164	0.119	0.109	0.125	0.147
64.5	0.12	0.111	0.113	0.103	0.111	0.123	0.131	0.122	0.148	0.14	0.17	0.164	0.12	0.11	0.125	0.149
64.75	0.121	0.112	0.112	0.102	0.111	0.123	0.13	0.122	0.149	0.14	0.168	0.166	0.119	0.109	0.125	0.147
65	0.119	0.113	0.111	0.104	0.111	0.124	0.129	0.122	0.149	0.14	0.169	0.166	0.118	0.109	0.125	0.146
65.25	0.118	0.11	0.108	0.102	0.108	0.122	0.129	0.121	0.148	0.139	0.17	0.164	0.118	0.108	0.123	0.147
65.5	0.119	0.111	0.11	0.102	0.113	0.123	0.13	0.121	0.15	0.141	0.17	0.167	0.119	0.108	0.125	0.147
65.75	0.118	0.111	0.107	0.1	0.11	0.124	0.129	0.119	0.15	0.14	0.172	0.165	0.118	0.108	0.125	0.146
66	0.118	0.113	0.109	0.101	0.109	0.124	0.129	0.121	0.15	0.141	0.172	0.166	0.118	0.107	0.125	0.146
66.25	0.119	0.111	0.108	0.098	0.108	0.124	0.131	0.12	0.149	0.141	0.171	0.165	0.116	0.108	0.124	0.146
66.5	0.117	0.111	0.108	0.1	0.108	0.123	0.129	0.12	0.15	0.141	0.172	0.165	0.117	0.107	0.124	0.145
66.75	0.118	0.112	0.107	0.1	0.11	0.124	0.13	0.121	0.151	0.14	0.172	0.165	0.118	0.107	0.124	0.147
67	0.118	0.111	0.107	0.1	0.109	0.124	0.13	0.121	0.151	0.142	0.173	0.167	0.118	0.107	0.125	0.148
67.25	0.118	0.111	0.107	0.101	0.11	0.124	0.131	0.12	0.152	0.142	0.173	0.168	0.118	0.108	0.125	0.148
67.5	0.12	0.112	0.111	0.106	0.111	0.124	0.134	0.124	0.152	0.144	0.173	0.17	0.12	0.11	0.125	0.149
67.75	0.12	0.113	0.111	0.105	0.114	0.125	0.134	0.127	0.152	0.144	0.174	0.171	0.121	0.11	0.128	0.151
68	0.121	0.112	0.114	0.106	0.114	0.126	0.135	0.128	0.154	0.146	0.174	0.172	0.12	0.111	0.128	0.152
68.25	0.12	0.114	0.114	0.105	0.115	0.127	0.136	0.129	0.155	0.147	0.177	0.173	0.121	0.112	0.128	0.153
68.5	0.123	0.115	0.114	0.107	0.117	0.129	0.136	0.129	0.156	0.148	0.178	0.175	0.122	0.114	0.129	0.154
68.75	0.124	0.117	0.113	0.105	0.119	0.129	0.136	0.128	0.157	0.147	0.178	0.174	0.123	0.113	0.13	0.153
69	0.124	0.116	0.116	0.107	0.118	0.13	0.138	0.132	0.157	0.149	0.178	0.175	0.123	0.114	0.13	0.155
69.25	0.124	0.117	0.115	0.107	0.12	0.13	0.137	0.129	0.158	0.149	0.179	0.176	0.122	0.112	0.13	0.153
69.5	0.124	0.117	0.118	0.107	0.12	0.131	0.139	0.132	0.158	0.149	0.179	0.179	0.124	0.116	0.131	0.155
69.75	0.121	0.115	0.114	0.105	0.118	0.13	0.137	0.13	0.158	0.15	0.179	0.176	0.122	0.113	0.13	0.155
70	0.122	0.115	0.115	0.106	0.117	0.13	0.137	0.129	0.158	0.15	0.18	0.176	0.123	0.112	0.13	0.154
70.25	0.123	0.113	0.114	0.104	0.119	0.13	0.139	0.129	0.158	0.149	0.179	0.177	0.124	0.112	0.13	0.155
70.5	0.122	0.114	0.114	0.107	0.119	0.13	0.137	0.128	0.158	0.15	0.181	0.176	0.123	0.111	0.13	0.153
70.75	0.121	0.115	0.114	0.106	0.118	0.131	0.137	0.129	0.16	0.15	0.181	0.177	0.122	0.112	0.129	0.154
71	0.121	0.113	0.113	0.106	0.116	0.13	0.137	0.13	0.16	0.151	0.181	0.177	0.122	0.113	0.128	0.154
71.25	0.119	0.114	0.112	0.106	0.117	0.13	0.14	0.129	0.161	0.151	0.181	0.176	0.122	0.112	0.129	0.154
71.5	0.122	0.113	0.113	0.104	0.117	0.129	0.141	0.131	0.162	0.151	0.182	0.178	0.123	0.113	0.13	0.155
71.75	0.121	0.115	0.111	0.105	0.116	0.132	0.139	0.13	0.163	0.15	0.182	0.177	0.123	0.112	0.13	0.153
72	0.122	0.118	0.115	0.108	0.119	0.133	0.142	0.132	0.163	0.153	0.183	0.181	0.124	0.113	0.131	0.156
72.25	0.121	0.116	0.116	0.108	0.118	0.133	0.143	0.131	0.165	0.153	0.184	0.182	0.125	0.114	0.131	0.157
72.5	0.122	0.118	0.117	0.108	0.121	0.132	0.144	0.133	0.165	0.155	0.185	0.182	0.126	0.115	0.132	0.158
72.75	0.124	0.117	0.118	0.109	0.122	0.135	0.145	0.136	0.166	0.155	0.186	0.185	0.126	0.116	0.133	0.159
73	0.125	0.118	0.12	0.111	0.124	0.136	0.146	0.137	0.167	0.158	0.187	0.184	0.127	0.117	0.135	0.161
73.25	0.129	0.121	0.121	0.11	0.126	0.14	0.148	0.138	0.167	0.158	0.188	0.186	0.128	0.117	0.137	0.161
73.5	0.127	0.12	0.121	0.111	0.127	0.141	0.148	0.138	0.168	0.159	0.189	0.187	0.127	0.117	0.136	0.162
73.75	0.129	0.121	0.121	0.11	0.131	0.141	0.149	0.14	0.169	0.158	0.19	0.188	0.129	0.118	0.137	0.162
74	0.13	0.121	0.121	0.111	0.128	0.142	0.149	0.141	0.169	0.159	0.189	0.188	0.13	0.119	0.138	0.163
74.25	0.128	0.121	0.122	0.113	0.126	0.14	0.149	0.141	0.169	0.159	0.19	0.189	0.127	0.118	0.136	0.163
74.5	0.126	0.12	0.12	0.11	0.129	0.141	0.148	0.14	0.17	0.16	0.191	0.19	0.129	0.118	0.136	0.162
74.75	0.124	0.118	0.119	0.11	0.13	0.141	0.148	0.14	0.168	0.16	0.19	0.188	0.127	0.117	0.136	0.162
75	0.126	0.119	0.12	0.112	0.132	0.141	0.149	0.138	0.171	0.161	0.191	0.19	0.128	0.117	0.136	0.162
75.25	0.126	0.12	0.118	0.109	0.132	0.14	0.148	0.138	0.171	0.161	0.192	0.19	0.129	0.116	0.136	0.161
75.5	0.124	0.119	0.119	0.111	0.13	0.138	0.15	0.139	0.171	0.16	0.191	0.19	0.128	0.116	0.136	0.162
75.75	0.125	0.118	0.117	0.108	0.13	0.14	0.148	0.138	0.171	0.16	0.191	0.191	0.127	0.116	0.135	0.16
76	0.126	0.117	0.119	0.109	0.129	0.139	0.149	0.14	0.172	0.161	0.191	0.19	0.126	0.116	0.135	0.162
76.25	0.126	0.119	0.119	0.109	0.13	0.141	0.149	0.138	0.172	0.162	0.193	0.192	0.127	0.116	0.137	0.162
76.5	0.125	0.118	0.119	0.107	0.13	0.14	0.149	0.139	0.172	0.161	0.194	0.192	0.126	0.116	0.136	0.162
76.75	0.126	0.117	0.119	0.109	0.13	0.14	0.151	0.142	0.173	0.162	0.193	0.193	0.128	0.116	0.136	0.163
77	0.129	0.12	0.123	0.111	0.135	0.142	0.151	0.146	0.173	0.165	0.195	0.195	0.129	0.118	0.137	0.163
77.25	0.129	0.12	0.123	0.112	0.135	0.144	0.153	0.146	0.174	0.165	0.197	0.196	0.13	0.118	0.139	0.165
77.5	0.126	0.122	0.124	0.113	0.132	0.143	0.156	0.146	0.175	0.167	0.197	0.199	0.13	0.121	0.139	0.167
77.75	0.127	0.12	0.126	0.113	0.133	0.144	0.154	0.148	0.175	0.167	0.198	0.199	0.13	0.121	0.138	0.169
78	0.129	0.123	0.124	0.111	0.137	0.145	0.154	0.147	0.177	0.168	0.198	0.198	0.132	0.12	0.139	0.167
78.25	0.129	0.123	0.124	0.112	0.136	0.145	0.156	0.148	0.177	0.168	0.2	0.2	0.132	0.121	0.139	0.168
78.5	0.128	0.123	0.128	0.115	0.139	0.147	0.159	0.15	0.177	0.169	0.2	0.202	0.132	0.122	0.143	0.169
78.75	0.132	0.126	0.127	0.115	0.143	0.149	0.16	0.15	0.179	0.17	0.202	0.203	0.134	0.122	0.142	0.168
79	0.131	0.126	0.128	0.116	0.142	0.149	0.16	0.152	0.179	0.171	0.203	0.204	0.134	0.122	0.144	0.171
79.25	0.13	0.124	0.127	0.115	0.137	0.148	0.16	0.151	0.18	0.172	0.203	0.204	0.133	0.122	0.142	0.17
79.5	0.131	0.123	0.126	0.114	0.139	0.149	0.159	0.149	0.179	0.172	0.203	0.204	0.131	0.122	0.141	0.169
79.75	0.127	0.121	0.124	0.113	0.136	0.146	0.158	0.149	0.18	0.171	0.203	0.203	0.131	0.12	0.139	0.169
80	0.128	0.122	0.125	0.112	0.137	0.147	0.158	0.151	0.18	0.172	0.202	0.204	0.133	0.12	0.14	0.169
80.25	0.129	0.122	0.126	0.112	0.14	0.149	0.158	0.15	0.181	0.171	0.206	0.206	0.132	0.119	0.142	0.169
80.5	0.129	0.123	0.125	0.112	0.141	0.148	0.159	0.149	0.182	0.172	0.205	0.206	0.132	0.121	0.14	0.169
80.75	0.127	0.123	0.124	0.111	0.14	0.148	0.159	0.151	0.182	0.174	0.206	0.206	0.131	0.119	0.14	0.168
81	0.127	0.122	0.124	0.11	0.14	0.148	0.16	0.151	0.182	0.173	0.205	0.204	0.132	0.12	0.141	0.169
81.25	0.129	0.123	0.124	0.11	0.14	0.148	0.16	0.151	0.184	0.173	0.207	0.206	0.132	0.12	0.14	0.169
81.5	0.128	0.122	0.126	0.112	0.141	0.149	0.162	0.152	0.184	0.175	0.208	0.207	0.132	0.12	0.141	0.17
81.75	0.131	0.124	0.128	0.115	0.142	0.149	0.164	0.154	0.185	0.176	0.209	0.208	0.134	0.123	0.143	0.172
82	0.129	0.123	0.13	0.116	0.143	0.15	0.165	0.157	0.185	0.178	0.209	0.212	0.134	0.124	0.142	0.175
82.25	0.13	0.125	0.132	0.117	0.145	0.152	0.167	0.158	0.187	0.18	0.21	0.213	0.135	0.125	0.144	0.176
82.5	0.132	0.126	0.131	0.116	0.146	0.153	0.167	0.161	0.187	0.18	0.211	0.213	0.134	0.126	0.145	0.175
82.75	0.135	0.126	0.13	0.115	0.149	0.154	0.167	0.159	0.19	0.18	0.212	0.213	0.136	0.125	0.146	0.176
83	0.135	0.127	0.132	0.115	0.151	0.155	0.169	0.162	0.19	0.18	0.214	0.213	0.138	0.125	0.147	0.177
83.25	0.131	0.127	0.133	0.117	0.147	0.154	0.171	0.163	0.19	0.181	0.214	0.219	0.137	0.126	0.147	0.177
83.5	0.135	0.127	0.134	0.117	0.151	0.156	0.17	0.164	0.19	0.183	0.215	0.22	0.138	0.128	0.146	0.177
83.75	0.135	0.126	0.134	0.117	0.15	0.156	0.172	0.163	0.191	0.183	0.216	0.221	0.137	0.127	0.148	0.178
84	0.135	0.127	0.132	0.116	0.149	0.157	0.171	0.162	0.191	0.183	0.215	0.221	0.136	0.125	0.147	0.176
84.25	0.133	0.127	0.131	0.116	0.149	0.156	0.174	0.162	0.191	0.183	0.215	0.22	0.137	0.126	0.146	0.177
84.5	0.131	0.126	0.131	0.116	0.146	0.154	0.173	0.161	0.192	0.183	0.216	0.219	0.135	0.126	0.146	0.176
84.75	0.131	0.126	0.13	0.115	0.145	0.154	0.171	0.159	0.193	0.184	0.217	0.22	0.135	0.124	0.146	0.176
85	0.132	0.127	0.131	0.115	0.148	0.156	0.173	0.161	0.193	0.184	0.217	0.22	0.135	0.125	0.145	0.177
85.25	0.131	0.125	0.131	0.116	0.145	0.158	0.173	0.162	0.193	0.185	0.218	0.22	0.135	0.126	0.146	0.176
85.5	0.137	0.126	0.132	0.115	0.147	0.156	0.174	0.162	0.195	0.185	0.219	0.222	0.136	0.124	0.145	0.178
85.75	0.135	0.127	0.129	0.115	0.147	0.157	0.171	0.16	0.194	0.185	0.219	0.222	0.136	0.123	0.147	0.179
86	0.136	0.125	0.131	0.116	0.149	0.156	0.174	0.163	0.195	0.187	0.22	0.225	0.136	0.125	0.147	0.179
86.25	0.136	0.128	0.132	0.117	0.15	0.158	0.175	0.163	0.196	0.188	0.221	0.225	0.138	0.127	0.15	0.18
86.5	0.139	0.128	0.135	0.118	0.151	0.16	0.176	0.168	0.197	0.19	0.222	0.227	0.139	0.128	0.149	0.182
86.75	0.14	0.129	0.135	0.12	0.156	0.16	0.179	0.169	0.2	0.19	0.225	0.228	0.14	0.129	0.151	0.183
87	0.139	0.131	0.137	0.12	0.155	0.162	0.179	0.171	0.199	0.191	0.225	0.23	0.14	0.13	0.151	0.185
87.25	0.139	0.131	0.137	0.124	0.154	0.162	0.183	0.172	0.199	0.192	0.226	0.232	0.14	0.13	0.15	0.185
87.5	0.143	0.13	0.137	0.125	0.156	0.162	0.182	0.17	0.201	0.192	0.225	0.231	0.143	0.129	0.152	0.186
87.75	0.137	0.13	0.138	0.125	0.157	0.162	0.183	0.173	0.202	0.193	0.226	0.233	0.141	0.131	0.151	0.187
88	0.143	0.133	0.141	0.126	0.159	0.165	0.182	0.174	0.202	0.195	0.226	0.234	0.142	0.131	0.153	0.187
88.25	0.141	0.132	0.14	0.124	0.158	0.166	0.185	0.174	0.203	0.195	0.228	0.234	0.142	0.131	0.153	0.187
88.5	0.139	0.132	0.138	0.125	0.159	0.167	0.185	0.174	0.204	0.194	0.228	0.234	0.142	0.132	0.153	0.187
88.75	0.138	0.13	0.137	0.123	0.155	0.164	0.184	0.171	0.205	0.195	0.228	0.233	0.141	0.131	0.152	0.186
89	0.139	0.131	0.137	0.123	0.159	0.165	0.183	0.173	0.203	0.194	0.229	0.234	0.141	0.131	0.152	0.187
89.25	0.138	0.131	0.139	0.123	0.158	0.166	0.185	0.171	0.205	0.197	0.23	0.235	0.142	0.13	0.153	0.186
89.5	0.135	0.129	0.138	0.122	0.157	0.167	0.184	0.173	0.205	0.196	0.231	0.234	0.142	0.13	0.151	0.185
89.75	0.136	0.13	0.137	0.121	0.156	0.167	0.183	0.174	0.206	0.196	0.231	0.235	0.142	0.129	0.151	0.186
90	0.14	0.13	0.137	0.12	0.16	0.169	0.184	0.173	0.206	0.196	0.231	0.235	0.142	0.129	0.154	0.185
90.25	0.139	0.13	0.139	0.122	0.159	0.169	0.185	0.174	0.207	0.197	0.233	0.236	0.144	0.13	0.152	0.186
90.5	0.137	0.131	0.139	0.121	0.16	0.168	0.185	0.176	0.207	0.199	0.233	0.236	0.143	0.13	0.156	0.186
90.75	0.139	0.132	0.14	0.12	0.16	0.169	0.185	0.176	0.208	0.2	0.234	0.237	0.144	0.131	0.159	0.187
91	0.14	0.132	0.143	0.122	0.164	0.171	0.188	0.178	0.21	0.2	0.235	0.24	0.144	0.133	0.154	0.19
91.25	0.141	0.132	0.144	0.124	0.173	0.173	0.187	0.179	0.21	0.2	0.236	0.242	0.146	0.133	0.157	0.19
91.5	0.142	0.135	0.145	0.125	0.175	0.172	0.191	0.181	0.212	0.204	0.237	0.244	0.147	0.135	0.161	0.191
91.75	0.142	0.134	0.145	0.126	0.176	0.172	0.19	0.181	0.214	0.203	0.238	0.245	0.146	0.134	0.159	0.191
92	0.142	0.137	0.146	0.124	0.174	0.172	0.191	0.181	0.214	0.205	0.237	0.246	0.146	0.134	0.159	0.193
92.25	0.143	0.136	0.146	0.125	0.176	0.175	0.194	0.183	0.213	0.205	0.24	0.246	0.146	0.136	0.159	0.195
92.5	0.144	0.137	0.147	0.126	0.178	0.18	0.195	0.185	0.215	0.207	0.24	0.248	0.149	0.136	0.163	0.198
92.75	0.144	0.136	0.147	0.128	0.177	0.183	0.196	0.185	0.215	0.209	0.241	0.248	0.149	0.137	0.161	0.195
93	0.147	0.137	0.148	0.127	0.181	0.183	0.197	0.186	0.217	0.207	0.243	0.249	0.151	0.139	0.163	0.197
93.25	0.145	0.137	0.149	0.126	0.179	0.182	0.198	0.187	0.216	0.208	0.243	0.249	0.151	0.138	0.162	0.197
93.5	0.143	0.136	0.148	0.127	0.18	0.184	0.196	0.186	0.217	0.209	0.242	0.249	0.15	0.138	0.162	0.198
93.75	0.144	0.136	0.145	0.125	0.177	0.183	0.196	0.187	0.216	0.208	0.242	0.249	0.149	0.138	0.16	0.196
94	0.141	0.137	0.144	0.123	0.177	0.183	0.197	0.184	0.218	0.209	0.244	0.247	0.148	0.137	0.161	0.194
94.25	0.139	0.135	0.145	0.126	0.174	0.183	0.196	0.185	0.22	0.209	0.243	0.249	0.146	0.136	0.159	0.196
94.5	0.142	0.137	0.145	0.126	0.177	0.183	0.196	0.185	0.219	0.21	0.244	0.248	0.148	0.136	0.16	0.196
94.75	0.142	0.137	0.143	0.124	0.179	0.184	0.197	0.184	0.22	0.209	0.245	0.249	0.149	0.135	0.161	0.195
95	0.14	0.133	0.145	0.124	0.176	0.182	0.201	0.185	0.22	0.211	0.245	0.249	0.148	0.136	0.161	0.196
95.25	0.142	0.136	0.142	0.123	0.176	0.184	0.203	0.187	0.221	0.209	0.246	0.249	0.149	0.136	0.162	0.195
95.5	0.14	0.136	0.145	0.123	0.178	0.185	0.204	0.186	0.221	0.211	0.246	0.25	0.149	0.137	0.162	0.196
95.75	0.141	0.136	0.147	0.127	0.178	0.185	0.206	0.191	0.222	0.214	0.247	0.254	0.149	0.138	0.162	0.199
96	0.145	0.137	0.149	0.128	0.181	0.186	0.207	0.193	0.223	0.215	0.249	0.255	0.15	0.139	0.162	0.201
96.25	0.144	0.137	0.149	0.128	0.185	0.187	0.208	0.194	0.223	0.215	0.25	0.256	0.151	0.139	0.164	0.2
96.5	0.148	0.139	0.151	0.13	0.186	0.188	0.208	0.196	0.225	0.217	0.251	0.256	0.153	0.14	0.165	0.201
96.75	0.145	0.139	0.15	0.129	0.187	0.187	0.208	0.197	0.226	0.216	0.252	0.258	0.151	0.141	0.164	0.201
97	0.149	0.14	0.152	0.129	0.188	0.189	0.211	0.198	0.225	0.22	0.252	0.259	0.153	0.142	0.165	0.202
97.25	0.148	0.142	0.152	0.129	0.191	0.188	0.21	0.199	0.229	0.22	0.253	0.261	0.154	0.143	0.166	0.204
97.5	0.149	0.142	0.153	0.131	0.192	0.189	0.212	0.2	0.229	0.22	0.253	0.259	0.153	0.144	0.165	0.204
97.75	0.147	0.142	0.153	0.131	0.192	0.19	0.21	0.2	0.23	0.221	0.255	0.259	0.154	0.141	0.167	0.204
98	0.15	0.142	0.153	0.132	0.194	0.192	0.211	0.201	0.229	0.223	0.257	0.263	0.155	0.144	0.169	0.204
98.25	0.149	0.143	0.154	0.131	0.194	0.191	0.215	0.203	0.23	0.222	0.257	0.263	0.156	0.144	0.167	0.205
98.5	0.146	0.139	0.151	0.131	0.19	0.19	0.212	0.204	0.231	0.222	0.257	0.263	0.154	0.142	0.166	0.204
98.75	0.146	0.14	0.151	0.13	0.19	0.191	0.213	0.2	0.231	0.222	0.256	0.262	0.154	0.141	0.165	0.203
99	0.147	0.141	0.152	0.13	0.192	0.193	0.214	0.2	0.232	0.223	0.257	0.262	0.153	0.142	0.166	0.204
99.25	0.147	0.141	0.15	0.128	0.191	0.193	0.213	0.202	0.232	0.223	0.257	0.264	0.154	0.141	0.166	0.204
99.5	0.146	0.14	0.151	0.128	0.188	0.192	0.213	0.201	0.232	0.223	0.259	0.261	0.153	0.141	0.165	0.203
99.75	0.147	0.141	0.15	0.128	0.19	0.193	0.214	0.202	0.233	0.224	0.259	0.264	0.154	0.141	0.166	0.203
100	0.146	0.144	0.15	0.128	0.189	0.192	0.214	0.202	0.235	0.225	0.259	0.265	0.155	0.14	0.166	0.203
100.25	0.145	0.144	0.149	0.129	0.19	0.194	0.214	0.203	0.236	0.225	0.26	0.264	0.154	0.14	0.165	0.203
100.5	0.146	0.144	0.152	0.131	0.192	0.195	0.216	0.203	0.237	0.227	0.261	0.266	0.154	0.142	0.166	0.206
100.75	0.149	0.145	0.152	0.13	0.193	0.197	0.217	0.205	0.237	0.228	0.263	0.269	0.156	0.144	0.168	0.206
101	0.153	0.146	0.154	0.131	0.197	0.198	0.22	0.208	0.238	0.229	0.265	0.27	0.157	0.144	0.168	0.208
101.25	0.15	0.147	0.154	0.133	0.196	0.197	0.22	0.21	0.239	0.23	0.265	0.271	0.158	0.145	0.17	0.208
101.5	0.148	0.146	0.156	0.132	0.195	0.198	0.222	0.211	0.24	0.232	0.265	0.272	0.158	0.145	0.17	0.208
101.75	0.151	0.146	0.156	0.134	0.198	0.2	0.223	0.213	0.24	0.233	0.267	0.273	0.158	0.147	0.171	0.209
102	0.153	0.145	0.158	0.133	0.2	0.199	0.223	0.214	0.242	0.234	0.267	0.275	0.159	0.148	0.172	0.21
102.25	0.153	0.148	0.16	0.136	0.203	0.201	0.225	0.215	0.243	0.235	0.269	0.277	0.16	0.148	0.173	0.212
102.5	0.154	0.148	0.159	0.134	0.204	0.202	0.226	0.214	0.244	0.236	0.27	0.275	0.161	0.147	0.173	0.211
102.75	0.154	0.15	0.159	0.135	0.203	0.203	0.228	0.216	0.244	0.237	0.271	0.279	0.16	0.148	0.173	0.211
103	0.154	0.15	0.159	0.135	0.205	0.203	0.227	0.215	0.245	0.237	0.271	0.278	0.161	0.148	0.172	0.212
103.25	0.151	0.149	0.159	0.134	0.204	0.202	0.227	0.219	0.246	0.236	0.273	0.279	0.161	0.148	0.174	0.212
103.5	0.151	0.148	0.159	0.135	0.206	0.203	0.228	0.216	0.246	0.237	0.271	0.28	0.16	0.148	0.173	0.211
103.75	0.148	0.147	0.158	0.133	0.204	0.204	0.228	0.216	0.245	0.239	0.272	0.28	0.159	0.148	0.171	0.211
104	0.15	0.146	0.156	0.133	0.208	0.203	0.227	0.213	0.247	0.239	0.274	0.28	0.16	0.147	0.171	0.211
104.25	0.151	0.149	0.158	0.133	0.207	0.204	0.229	0.214	0.246	0.239	0.274	0.28	0.16	0.147	0.172	0.21
104.5	0.151	0.147	0.158	0.133	0.209	0.203	0.23	0.216	0.247	0.239	0.274	0.28	0.159	0.146	0.17	0.21
104.75	0.15	0.147	0.158	0.133	0.206	0.204	0.229	0.215	0.249	0.24	0.275	0.28	0.159	0.147	0.173	0.211
105	0.149	0.146	0.156	0.133	0.205	0.204	0.229	0.216	0.248	0.24	0.276	0.281	0.159	0.146	0.172	0.211
105.25	0.15	0.148	0.159	0.134	0.209	0.205	0.232	0.217	0.248	0.24	0.277	0.282	0.159	0.148	0.171	0.21
105.5	0.15	0.149	0.159	0.135	0.209	0.206	0.231	0.218	0.25	0.244	0.278	0.286	0.162	0.148	0.172	0.21
105.75	0.15	0.149	0.16	0.134	0.209	0.208	0.231	0.217	0.25	0.242	0.28	0.285	0.16	0.147	0.173	0.214
106	0.151	0.148	0.163	0.135	0.211	0.21	0.235	0.221	0.255	0.245	0.281	0.286	0.162	0.15	0.173	0.215
106.25	0.15	0.149	0.162	0.136	0.211	0.209	0.236	0.222	0.253	0.246	0.281	0.286	0.162	0.151	0.174	0.217
106.5	0.155	0.15	0.166	0.137	0.217	0.209	0.238	0.226	0.253	0.246	0.282	0.29	0.164	0.152	0.175	0.219
106.75	0.155	0.151	0.167	0.137	0.219	0.211	0.238	0.225	0.255	0.249	0.284	0.292	0.163	0.153	0.175	0.219
107	0.158	0.155	0.167	0.138	0.221	0.213	0.241	0.229	0.256	0.248	0.286	0.294	0.165	0.153	0.177	0.219
107.25	0.157	0.154	0.167	0.139	0.221	0.214	0.243	0.23	0.258	0.25	0.286	0.295	0.166	0.154	0.177	0.221
107.5	0.158	0.153	0.167	0.137	0.222	0.216	0.242	0.229	0.258	0.25	0.286	0.294	0.166	0.153	0.177	0.219
107.75	0.16	0.153	0.169	0.138	0.224	0.216	0.243	0.232	0.259	0.252	0.288	0.297	0.166	0.154	0.179	0.221
108	0.157	0.152	0.17	0.138	0.221	0.216	0.243	0.231	0.259	0.252	0.288	0.298	0.164	0.155	0.178	0.221
108.25	0.155	0.151	0.165	0.138	0.219	0.215	0.244	0.23	0.261	0.252	0.288	0.297	0.165	0.154	0.177	0.221
108.5	0.153	0.149	0.167	0.137	0.219	0.214	0.244	0.232	0.262	0.253	0.288	0.297	0.164	0.155	0.176	0.22
108.75	0.153	0.15	0.167	0.138	0.22	0.216	0.244	0.232	0.262	0.252	0.289	0.296	0.164	0.155	0.177	0.218
109	0.155	0.152	0.166	0.137	0.222	0.216	0.243	0.231	0.264	0.252	0.291	0.299	0.165	0.155	0.177	0.22
109.25	0.154	0.151	0.166	0.136	0.221	0.214	0.244	0.231	0.263	0.254	0.291	0.297	0.164	0.156	0.177	0.219
109.5	0.154	0.151	0.165	0.137	0.221	0.218	0.246	0.232	0.265	0.254	0.293	0.301	0.166	0.157	0.177	0.219
109.75	0.155	0.152	0.165	0.136	0.22	0.217	0.248	0.233	0.264	0.255	0.293	0.3	0.166	0.157	0.176	0.22
110	0.155	0.151	0.165	0.137	0.221	0.218	0.247	0.235	0.266	0.255	0.293	0.301	0.168	0.158	0.176	0.22
110.25	0.153	0.15	0.163	0.136	0.219	0.218	0.246	0.236	0.265	0.255	0.293	0.301	0.165	0.155	0.177	0.221
110.5	0.155	0.151	0.168	0.138	0.222	0.219	0.249	0.238	0.267	0.256	0.294	0.303	0.166	0.158	0.177	0.223
110.75	0.158	0.153	0.168	0.14	0.225	0.222	0.25	0.238	0.267	0.26	0.298	0.307	0.167	0.158	0.179	0.223
111	0.157	0.154	0.172	0.141	0.227	0.223	0.253	0.242	0.27	0.261	0.298	0.31	0.169	0.16	0.18	0.227
111.25	0.161	0.156	0.172	0.141	0.229	0.223	0.253	0.242	0.272	0.261	0.299	0.311	0.171	0.16	0.182	0.228
111.5	0.161	0.156	0.173	0.142	0.231	0.225	0.254	0.244	0.271	0.262	0.3	0.312	0.171	0.16	0.181	0.227
111.75	0.161	0.157	0.172	0.143	0.233	0.223	0.256	0.245	0.272	0.263	0.302	0.313	0.171	0.162	0.183	0.227
112	0.163	0.156	0.175	0.144	0.235	0.227	0.258	0.246	0.273	0.265	0.304	0.316	0.174	0.161	0.184	0.228
112.25	0.161	0.158	0.174	0.143	0.235	0.229	0.259	0.247	0.274	0.265	0.305	0.316	0.173	0.162	0.184	0.23
112.5	0.16	0.158	0.175	0.142	0.234	0.228	0.262	0.248	0.274	0.266	0.305	0.316	0.173	0.164	0.185	0.23
112.75	0.159	0.155	0.173	0.142	0.234	0.225	0.261	0.248	0.273	0.266	0.305	0.316	0.171	0.162	0.183	0.229
113	0.16	0.153	0.173	0.141	0.233	0.228	0.259	0.245	0.274	0.266	0.306	0.316	0.172	0.16	0.184	0.228
113.25	0.16	0.156	0.17	0.14	0.232	0.23	0.261	0.246	0.275	0.263	0.307	0.316	0.172	0.159	0.183	0.228
113.5	0.161	0.157	0.172	0.142	0.232	0.232	0.262	0.246	0.275	0.268	0.309	0.317	0.172	0.159	0.183	0.228
113.75	0.155	0.154	0.175	0.141	0.232	0.23	0.262	0.253	0.273	0.268	0.307	0.316	0.172	0.16	0.183	0.228
114	0.156	0.157	0.176	0.141	0.235	0.232	0.262	0.253	0.274	0.268	0.309	0.319	0.173	0.161	0.184	0.229
114.25	0.157	0.155	0.174	0.142	0.235	0.231	0.262	0.254	0.275	0.27	0.31	0.319	0.172	0.161	0.185	0.229
114.5	0.157	0.156	0.175	0.141	0.236	0.231	0.263	0.253	0.275	0.268	0.312	0.318	0.172	0.16	0.182	0.228
114.75	0.155	0.155	0.174	0.141	0.236	0.231	0.264	0.255	0.276	0.273	0.31	0.319	0.171	0.161	0.182	0.229
115	0.156	0.157	0.175	0.14	0.238	0.232	0.266	0.257	0.277	0.273	0.312	0.323	0.172	0.163	0.184	0.231
115.25	0.155	0.157	0.178	0.143	0.236	0.234	0.269	0.259	0.278	0.273	0.313	0.325	0.173	0.164	0.184	0.234
115.5	0.159	0.16	0.178	0.144	0.241	0.235	0.27	0.26	0.281	0.276	0.315	0.326	0.174	0.164	0.187	0.232
115.75	0.157	0.158	0.178	0.144	0.241	0.236	0.271	0.263	0.28	0.277	0.316	0.327	0.175	0.166	0.187	0.233
116	0.159	0.158	0.18	0.146	0.24	0.237	0.273	0.264	0.281	0.278	0.314	0.33	0.174	0.167	0.187	0.234
116.25	0.158	0.158	0.182	0.147	0.241	0.236	0.276	0.265	0.282	0.28	0.318	0.33	0.176	0.167	0.188	0.235
116.5	0.163	0.16	0.181	0.148	0.245	0.239	0.276	0.267	0.284	0.28	0.318	0.331	0.177	0.168	0.189	0.238
116.75	0.166	0.162	0.184	0.147	0.249	0.242	0.276	0.269	0.286	0.282	0.32	0.333	0.178	0.168	0.189	0.239
117	0.166	0.163	0.182	0.15	0.249	0.242	0.278	0.268	0.288	0.283	0.322	0.333	0.178	0.169	0.19	0.238
117.25	0.162	0.161	0.183	0.149	0.254	0.241	0.277	0.269	0.288	0.283	0.322	0.332	0.178	0.168	0.188	0.237
117.5	0.163	0.162	0.182	0.15	0.255	0.241	0.278	0.27	0.288	0.284	0.322	0.333	0.178	0.169	0.19	0.238
117.75	0.162	0.161	0.181	0.149	0.254	0.241	0.276	0.268	0.288	0.283	0.32	0.333	0.177	0.167	0.186	0.237
118	0.162	0.161	0.18	0.149	0.254	0.241	0.277	0.267	0.29	0.283	0.322	0.332	0.178	0.167	0.189	0.235
118.25	0.16	0.161	0.18	0.149	0.253	0.242	0.278	0.269	0.291	0.283	0.325	0.332	0.177	0.165	0.189	0.236
118.5	0.161	0.161	0.18	0.148	0.253	0.242	0.277	0.269	0.29	0.282	0.324	0.336	0.178	0.167	0.189	0.236
118.75	0.161	0.161	0.18	0.146	0.255	0.243	0.281	0.269	0.292	0.284	0.325	0.336	0.178	0.168	0.188	0.236
119	0.161	0.161	0.18	0.148	0.255	0.242	0.28	0.27	0.293	0.287	0.326	0.338	0.178	0.168	0.19	0.238
119.25	0.159	0.161	0.179	0.147	0.255	0.244	0.279	0.271	0.295	0.285	0.326	0.336	0.178	0.167	0.191	0.236
119.5	0.16	0.16	0.181	0.149	0.256	0.244	0.282	0.272	0.293	0.286	0.328	0.339	0.179	0.169	0.191	0.241
119.75	0.162	0.164	0.182	0.149	0.258	0.248	0.283	0.276	0.297	0.288	0.329	0.34	0.179	0.169	0.191	0.24
120	0.161	0.164	0.185	0.153	0.261	0.249	0.285	0.278	0.297	0.292	0.329	0.345	0.18	0.171	0.192	0.241
120.25	0.165	0.164	0.184	0.15	0.263	0.25	0.285	0.277	0.297	0.289	0.33	0.343	0.181	0.17	0.194	0.24
120.5	0.164	0.164	0.187	0.153	0.262	0.25	0.288	0.28	0.298	0.292	0.332	0.345	0.183	0.172	0.194	0.244
120.75	0.164	0.165	0.188	0.152	0.266	0.251	0.288	0.281	0.299	0.292	0.333	0.345	0.183	0.171	0.195	0.244
121	0.167	0.167	0.192	0.154	0.27	0.253	0.291	0.284	0.301	0.294	0.335	0.349	0.184	0.173	0.195	0.247
121.25	0.171	0.168	0.189	0.154	0.271	0.254	0.29	0.284	0.302	0.294	0.336	0.349	0.185	0.173	0.198	0.247
121.5	0.167	0.17	0.191	0.155	0.273	0.255	0.294	0.286	0.302	0.297	0.338	0.351	0.185	0.175	0.198	0.25
121.75	0.166	0.17	0.192	0.153	0.271	0.255	0.293	0.286	0.302	0.298	0.337	0.352	0.185	0.174	0.197	0.249
122	0.165	0.168	0.191	0.154	0.27	0.254	0.294	0.286	0.303	0.295	0.339	0.353	0.185	0.175	0.197	0.247
122.25	0.164	0.169	0.188	0.153	0.267	0.254	0.294	0.284	0.304	0.298	0.339	0.353	0.183	0.174	0.195	0.249
122.5	0.165	0.171	0.188	0.153	0.269	0.255	0.294	0.283	0.304	0.295	0.34	0.351	0.184	0.17	0.197	0.247
122.75	0.162	0.168	0.188	0.151	0.267	0.254	0.294	0.285	0.305	0.297	0.339	0.352	0.182	0.172	0.196	0.246
123	0.165	0.169	0.188	0.152	0.27	0.256	0.295	0.286	0.306	0.298	0.342	0.353	0.184	0.173	0.197	0.246
123.25	0.165	0.168	0.187	0.153	0.269	0.256	0.296	0.284	0.307	0.299	0.341	0.354	0.184	0.171	0.197	0.245
123.5	0.164	0.167	0.189	0.153	0.27	0.256	0.297	0.286	0.309	0.299	0.343	0.354	0.183	0.172	0.195	0.247
123.75	0.164	0.166	0.184	0.152	0.269	0.257	0.296	0.286	0.309	0.3	0.341	0.355	0.185	0.171	0.198	0.246
124	0.165	0.167	0.187	0.153	0.269	0.258	0.298	0.288	0.309	0.3	0.344	0.356	0.183	0.173	0.198	0.246
124.25	0.163	0.167	0.186	0.152	0.27	0.259	0.299	0.288	0.309	0.302	0.342	0.357	0.185	0.172	0.197	0.246
124.5	0.165	0.17	0.188	0.154	0.274	0.26	0.303	0.292	0.312	0.304	0.345	0.361	0.184	0.173	0.198	0.248
124.75	0.167	0.17	0.192	0.156	0.274	0.261	0.304	0.295	0.311	0.306	0.346	0.363	0.185	0.177	0.198	0.25
125	0.17	0.172	0.191	0.156	0.279	0.265	0.305	0.295	0.313	0.308	0.348	0.362	0.185	0.176	0.2	0.251
125.25	0.174	0.173	0.194	0.158	0.282	0.266	0.307	0.298	0.314	0.311	0.348	0.367	0.189	0.177	0.202	0.252
125.5	0.174	0.174	0.194	0.157	0.282	0.266	0.305	0.299	0.315	0.311	0.35	0.364	0.189	0.177	0.202	0.251
125.75	0.173	0.173	0.195	0.159	0.283	0.266	0.308	0.299	0.317	0.312	0.351	0.366	0.188	0.178	0.202	0.25
126	0.174	0.174	0.195	0.158	0.288	0.269	0.311	0.301	0.318	0.314	0.353	0.371	0.191	0.179	0.202	0.253
126.25	0.173	0.174	0.196	0.158	0.288	0.269	0.31	0.303	0.317	0.312	0.354	0.371	0.19	0.178	0.205	0.253
126.5	0.177	0.176	0.196	0.158	0.289	0.269	0.313	0.303	0.32	0.314	0.355	0.372	0.19	0.178	0.205	0.252
126.75	0.176	0.174	0.198	0.159	0.287	0.271	0.313	0.302	0.32	0.315	0.356	0.372	0.191	0.178	0.202	0.253
127	0.173	0.174	0.194	0.159	0.286	0.27	0.313	0.303	0.32	0.315	0.355	0.372	0.19	0.177	0.203	0.249
127.25	0.174	0.173	0.194	0.156	0.285	0.272	0.313	0.303	0.322	0.316	0.355	0.373	0.19	0.177	0.202	0.251
127.5	0.173	0.173	0.192	0.156	0.285	0.271	0.312	0.302	0.322	0.313	0.358	0.373	0.189	0.176	0.204	0.25
127.75	0.171	0.172	0.193	0.156	0.285	0.27	0.314	0.303	0.323	0.317	0.359	0.374	0.189	0.177	0.203	0.251
128	0.169	0.172	0.194	0.156	0.284	0.271	0.314	0.304	0.325	0.319	0.359	0.375	0.189	0.177	0.204	0.249
128.25	0.17	0.172	0.194	0.157	0.286	0.271	0.314	0.304	0.323	0.316	0.359	0.376	0.189	0.176	0.204	0.248
128.5	0.171	0.171	0.191	0.156	0.286	0.272	0.316	0.306	0.324	0.318	0.358	0.376	0.188	0.18	0.204	0.25
128.75	0.172	0.171	0.192	0.155	0.289	0.274	0.315	0.305	0.328	0.318	0.364	0.378	0.19	0.178	0.206	0.252
129	0.175	0.174	0.193	0.157	0.29	0.275	0.318	0.308	0.327	0.32	0.365	0.379	0.189	0.181	0.204	0.254
129.25	0.175	0.173	0.196	0.159	0.292	0.276	0.321	0.312	0.329	0.32	0.365	0.382	0.192	0.182	0.207	0.258
129.5	0.175	0.175	0.198	0.16	0.295	0.279	0.324	0.314	0.33	0.323	0.368	0.386	0.191	0.182	0.206	0.259
129.75	0.177	0.179	0.201	0.162	0.298	0.278	0.326	0.315	0.331	0.325	0.368	0.386	0.193	0.183	0.208	0.26
130	0.179	0.179	0.202	0.162	0.3	0.282	0.328	0.317	0.333	0.325	0.371	0.389	0.194	0.183	0.208	0.26
130.25	0.176	0.178	0.198	0.163	0.299	0.282	0.328	0.316	0.333	0.325	0.372	0.387	0.195	0.186	0.209	0.263
130.5	0.178	0.177	0.201	0.163	0.302	0.283	0.328	0.317	0.334	0.327	0.37	0.389	0.195	0.19	0.21	0.26
130.75	0.181	0.179	0.201	0.163	0.306	0.287	0.332	0.321	0.336	0.329	0.372	0.393	0.199	0.188	0.21	0.265
131	0.183	0.18	0.205	0.165	0.307	0.287	0.333	0.323	0.338	0.331	0.376	0.394	0.198	0.19	0.211	0.265
131.25	0.178	0.177	0.204	0.164	0.304	0.286	0.332	0.322	0.338	0.331	0.376	0.394	0.197	0.189	0.21	0.264
131.5	0.179	0.178	0.202	0.162	0.305	0.285	0.333	0.322	0.34	0.33	0.375	0.393	0.195	0.189	0.211	0.263
131.75	0.176	0.176	0.2	0.162	0.303	0.286	0.334	0.322	0.341	0.33	0.377	0.396	0.196	0.187	0.21	0.26
132	0.18	0.178	0.199	0.162	0.304	0.288	0.333	0.323	0.342	0.332	0.378	0.395	0.196	0.189	0.21	0.261
132.25	0.177	0.178	0.198	0.16	0.304	0.289	0.336	0.323	0.343	0.332	0.377	0.394	0.196	0.187	0.211	0.261
132.5	0.178	0.181	0.2	0.161	0.305	0.289	0.336	0.323	0.342	0.334	0.379	0.398	0.196	0.188	0.211	0.26
132.75	0.176	0.179	0.199	0.162	0.306	0.29	0.337	0.327	0.343	0.332	0.381	0.398	0.196	0.186	0.21	0.261
133	0.178	0.181	0.2	0.161	0.307	0.291	0.338	0.326	0.343	0.336	0.381	0.398	0.197	0.189	0.213	0.261
133.25	0.179	0.18	0.197	0.159	0.308	0.293	0.338	0.327	0.345	0.334	0.381	0.399	0.196	0.19	0.212	0.26
133.5	0.178	0.179	0.199	0.159	0.308	0.293	0.338	0.325	0.344	0.337	0.383	0.4	0.196	0.185	0.21	0.262
133.75	0.177	0.178	0.199	0.161	0.307	0.294	0.339	0.327	0.346	0.338	0.384	0.4	0.197	0.187	0.212	0.262
134	0.178	0.18	0.201	0.162	0.309	0.293	0.343	0.329	0.349	0.34	0.385	0.404	0.198	0.189	0.213	0.263
134.25	0.18	0.18	0.202	0.163	0.313	0.297	0.344	0.331	0.351	0.342	0.385	0.405	0.198	0.189	0.213	0.264
134.5	0.182	0.183	0.205	0.166	0.314	0.297	0.347	0.335	0.351	0.344	0.388	0.409	0.199	0.191	0.216	0.268
134.75	0.184	0.183	0.205	0.166	0.317	0.3	0.347	0.337	0.353	0.345	0.39	0.41	0.2	0.191	0.214	0.267
135	0.185	0.183	0.207	0.168	0.319	0.301	0.349	0.341	0.355	0.348	0.391	0.413	0.201	0.192	0.215	0.27
135.25	0.186	0.183	0.209	0.166	0.323	0.302	0.353	0.343	0.355	0.349	0.393	0.413	0.201	0.195	0.218	0.271
135.5	0.187	0.184	0.211	0.168	0.325	0.304	0.352	0.342	0.359	0.348	0.393	0.414	0.203	0.195	0.221	0.269
135.75	0.185	0.184	0.213	0.168	0.32	0.304	0.354	0.344	0.358	0.35	0.394	0.415	0.202	0.195	0.217	0.27
136	0.185	0.186	0.214	0.171	0.323	0.303	0.358	0.347	0.359	0.353	0.395	0.418	0.202	0.195	0.216	0.272
136.25	0.186	0.185	0.215	0.169	0.324	0.306	0.357	0.346	0.358	0.351	0.396	0.419	0.203	0.194	0.219	0.273
136.5	0.184	0.184	0.211	0.169	0.322	0.304	0.358	0.345	0.36	0.351	0.396	0.419	0.202	0.196	0.22	0.269
136.75	0.184	0.185	0.21	0.166	0.323	0.306	0.359	0.345	0.362	0.353	0.397	0.419	0.202	0.195	0.219	0.271
137	0.186	0.185	0.211	0.167	0.324	0.306	0.358	0.347	0.364	0.353	0.399	0.421	0.202	0.194	0.217	0.269
137.25	0.185	0.184	0.212	0.167	0.325	0.308	0.361	0.345	0.364	0.352	0.398	0.419	0.206	0.195	0.22	0.271
137.5	0.185	0.184	0.21	0.167	0.324	0.308	0.361	0.347	0.365	0.352	0.401	0.422	0.205	0.194	0.22	0.269
137.75	0.183	0.184	0.209	0.166	0.323	0.308	0.361	0.346	0.366	0.353	0.401	0.422	0.204	0.19	0.218	0.271
138	0.183	0.185	0.21	0.168	0.324	0.309	0.361	0.35	0.367	0.356	0.403	0.424	0.204	0.194	0.218	0.273
138.25	0.184	0.185	0.209	0.168	0.327	0.31	0.363	0.35	0.368	0.357	0.403	0.425	0.204	0.194	0.219	0.272
138.5	0.182	0.186	0.21	0.168	0.326	0.31	0.365	0.35	0.369	0.358	0.403	0.426	0.205	0.196	0.216	0.274
138.75	0.184	0.186	0.213	0.168	0.328	0.311	0.368	0.354	0.369	0.359	0.405	0.429	0.206	0.197	0.219	0.276
139	0.186	0.185	0.214	0.172	0.33	0.313	0.369	0.355	0.37	0.361	0.408	0.43	0.207	0.198	0.22	0.277
139.25	0.189	0.187	0.214	0.17	0.332	0.315	0.369	0.355	0.372	0.362	0.408	0.43	0.206	0.198	0.219	0.274
139.5	0.192	0.188	0.216	0.172	0.336	0.317	0.373	0.359	0.374	0.364	0.41	0.433	0.208	0.199	0.223	0.277
139.75	0.191	0.189	0.214	0.173	0.338	0.317	0.373	0.358	0.374	0.365	0.411	0.434	0.208	0.198	0.22	0.278
140	0.194	0.19	0.218	0.175	0.341	0.32	0.375	0.361	0.377	0.366	0.413	0.437	0.209	0.2	0.224	0.28
140.25	0.192	0.193	0.218	0.173	0.343	0.321	0.376	0.362	0.377	0.367	0.415	0.437	0.211	0.199	0.226	0.277
140.5	0.193	0.194	0.221	0.175	0.343	0.323	0.378	0.363	0.378	0.368	0.415	0.441	0.212	0.203	0.227	0.283
140.75	0.193	0.191	0.222	0.174	0.343	0.324	0.381	0.366	0.377	0.368	0.416	0.441	0.212	0.203	0.226	0.283
141	0.197	0.195	0.221	0.177	0.348	0.325	0.381	0.366	0.38	0.371	0.417	0.443	0.212	0.202	0.228	0.283
141.25	0.192	0.192	0.222	0.173	0.345	0.324	0.381	0.366	0.379	0.37	0.417	0.441	0.211	0.2	0.225	0.285
141.5	0.194	0.192	0.22	0.174	0.346	0.325	0.382	0.366	0.381	0.371	0.418	0.443	0.21	0.201	0.226	0.283
141.75	0.193	0.192	0.22	0.176	0.346	0.324	0.383	0.367	0.383	0.372	0.42	0.443	0.212	0.2	0.226	0.281
142	0.194	0.192	0.218	0.174	0.346	0.327	0.381	0.366	0.383	0.371	0.42	0.443	0.212	0.199	0.227	0.282
142.25	0.192	0.189	0.216	0.172	0.346	0.326	0.381	0.367	0.383	0.372	0.421	0.444	0.21	0.198	0.225	0.282
142.5	0.191	0.19	0.217	0.174	0.346	0.326	0.385	0.369	0.384	0.375	0.422	0.447	0.211	0.201	0.225	0.282
142.75	0.191	0.191	0.216	0.171	0.346	0.327	0.385	0.368	0.384	0.372	0.421	0.445	0.209	0.199	0.225	0.282
143	0.194	0.193	0.217	0.172	0.348	0.328	0.386	0.37	0.386	0.374	0.424	0.447	0.21	0.199	0.227	0.28
143.25	0.192	0.193	0.216	0.172	0.348	0.329	0.387	0.371	0.384	0.376	0.423	0.448	0.211	0.199	0.227	0.28
143.5	0.194	0.193	0.22	0.175	0.351	0.332	0.388	0.374	0.388	0.375	0.425	0.449	0.213	0.2	0.227	0.283
143.75	0.194	0.194	0.22	0.177	0.352	0.332	0.39	0.376	0.389	0.38	0.426	0.452	0.213	0.2	0.227	0.285
144	0.196	0.194	0.223	0.176	0.356	0.334	0.393	0.378	0.39	0.382	0.428	0.454	0.214	0.201	0.23	0.285
144.25	0.197	0.196	0.225	0.178	0.358	0.337	0.394	0.38	0.392	0.382	0.428	0.457	0.216	0.203	0.229	0.287
144.5	0.197	0.198	0.226	0.179	0.361	0.338	0.397	0.384	0.395	0.386	0.43	0.459	0.217	0.205	0.231	0.291
144.75	0.198	0.197	0.226	0.178	0.36	0.338	0.398	0.382	0.395	0.385	0.431	0.46	0.217	0.205	0.233	0.29
145	0.201	0.199	0.227	0.178	0.365	0.34	0.4	0.386	0.394	0.388	0.432	0.464	0.219	0.204	0.233	0.292
145.25	0.199	0.198	0.224	0.182	0.365	0.343	0.401	0.386	0.397	0.389	0.433	0.462	0.218	0.205	0.232	0.292
145.5	0.201	0.2	0.227	0.181	0.365	0.342	0.403	0.388	0.397	0.389	0.435	0.464	0.219	0.206	0.235	0.291
145.75	0.198	0.199	0.227	0.18	0.364	0.343	0.404	0.39	0.397	0.391	0.436	0.465	0.217	0.208	0.233	0.291
146	0.197	0.198	0.228	0.181	0.365	0.343	0.403	0.389	0.4	0.391	0.436	0.467	0.218	0.208	0.234	0.293
146.25	0.196	0.198	0.224	0.181	0.366	0.344	0.404	0.388	0.402	0.391	0.437	0.467	0.218	0.205	0.233	0.291
146.5	0.197	0.199	0.224	0.181	0.367	0.345	0.405	0.388	0.401	0.392	0.438	0.467	0.217	0.205	0.233	0.291
146.75	0.199	0.199	0.223	0.18	0.367	0.345	0.405	0.389	0.402	0.394	0.438	0.467	0.217	0.204	0.233	0.292
147	0.199	0.199	0.224	0.181	0.367	0.345	0.406	0.39	0.403	0.394	0.44	0.468	0.216	0.205	0.231	0.29
147.25	0.198	0.198	0.224	0.179	0.368	0.346	0.409	0.389	0.404	0.394	0.439	0.468	0.217	0.205	0.234	0.291
147.5	0.198	0.201	0.222	0.179	0.366	0.346	0.409	0.389	0.404	0.396	0.439	0.471	0.218	0.205	0.233	0.29
147.75	0.195	0.2	0.225	0.179	0.369	0.347	0.41	0.392	0.406	0.396	0.442	0.471	0.216	0.204	0.232	0.29
148	0.198	0.2	0.224	0.179	0.369	0.346	0.41	0.392	0.406	0.397	0.443	0.472	0.217	0.205	0.234	0.29
148.25	0.2	0.201	0.224	0.182	0.37	0.349	0.414	0.395	0.407	0.398	0.444	0.475	0.218	0.205	0.234	0.294
148.5	0.2	0.201	0.228	0.183	0.371	0.351	0.415	0.397	0.41	0.401	0.447	0.475	0.218	0.207	0.236	0.295
148.75	0.199	0.201	0.229	0.184	0.374	0.352	0.418	0.4	0.41	0.401	0.452	0.478	0.218	0.208	0.236	0.296
149	0.199	0.203	0.23	0.185	0.378	0.354	0.419	0.402	0.41	0.404	0.455	0.481	0.219	0.208	0.235	0.3
149.25	0.202	0.204	0.231	0.185	0.379	0.356	0.421	0.404	0.412	0.406	0.458	0.482	0.222	0.21	0.235	0.3
149.5	0.206	0.205	0.229	0.183	0.381	0.358	0.423	0.405	0.412	0.407	0.458	0.483	0.222	0.21	0.239	0.301
149.75	0.205	0.205	0.232	0.185	0.383	0.358	0.424	0.406	0.413	0.407	0.458	0.485	0.225	0.212	0.239	0.302
150	0.206	0.207	0.234	0.188	0.386	0.359	0.427	0.406	0.416	0.409	0.461	0.486	0.225	0.214	0.238	0.301
150.25	0.206	0.205	0.231	0.184	0.387	0.36	0.426	0.406	0.417	0.409	0.463	0.487	0.227	0.212	0.239	0.301
150.5	0.207	0.206	0.234	0.186	0.387	0.362	0.428	0.411	0.419	0.412	0.463	0.49	0.225	0.214	0.24	0.301
150.75	0.208	0.208	0.235	0.188	0.388	0.364	0.43	0.412	0.42	0.412	0.463	0.49	0.23	0.213	0.24	0.304
151	0.207	0.206	0.236	0.186	0.389	0.362	0.428	0.412	0.421	0.413	0.465	0.492	0.229	0.211	0.242	0.305
151.25	0.207	0.207	0.235	0.186	0.389	0.363	0.431	0.411	0.42	0.413	0.467	0.492	0.229	0.211	0.239	0.302
151.5	0.205	0.205	0.235	0.186	0.388	0.363	0.431	0.41	0.419	0.415	0.465	0.493	0.231	0.211	0.24	0.304
151.75	0.204	0.206	0.233	0.183	0.387	0.365	0.43	0.412	0.42	0.414	0.467	0.491	0.23	0.21	0.236	0.302
152	0.206	0.206	0.234	0.185	0.387	0.365	0.433	0.412	0.422	0.415	0.469	0.494	0.23	0.21	0.241	0.302
152.25	0.206	0.206	0.232	0.183	0.391	0.367	0.433	0.413	0.423	0.416	0.468	0.495	0.23	0.21	0.24	0.302
152.5	0.205	0.206	0.232	0.185	0.391	0.366	0.435	0.414	0.423	0.417	0.469	0.496	0.228	0.209	0.241	0.303
152.75	0.206	0.206	0.231	0.187	0.392	0.368	0.436	0.415	0.424	0.418	0.472	0.498	0.229	0.209	0.241	0.302
153	0.204	0.207	0.234	0.186	0.393	0.368	0.437	0.415	0.427	0.42	0.472	0.5	0.23	0.211	0.24	0.303
153.25	0.207	0.209	0.234	0.188	0.397	0.372	0.44	0.419	0.429	0.421	0.474	0.501	0.231	0.211	0.243	0.303
153.5	0.207	0.209	0.237	0.188	0.396	0.372	0.443	0.422	0.43	0.423	0.474	0.504	0.232	0.213	0.244	0.304
153.75	0.208	0.209	0.236	0.188	0.398	0.373	0.443	0.422	0.429	0.423	0.474	0.504	0.231	0.214	0.241	0.304
154	0.213	0.212	0.24	0.19	0.405	0.376	0.446	0.426	0.431	0.426	0.479	0.509	0.234	0.215	0.245	0.308
154.25	0.213	0.211	0.24	0.191	0.405	0.378	0.45	0.427	0.434	0.427	0.477	0.51	0.233	0.214	0.246	0.308
154.5	0.214	0.214	0.243	0.193	0.407	0.38	0.45	0.43	0.433	0.428	0.481	0.514	0.233	0.216	0.246	0.309
154.75	0.211	0.214	0.241	0.192	0.407	0.38	0.451	0.43	0.435	0.43	0.481	0.514	0.233	0.214	0.246	0.308
155	0.213	0.214	0.244	0.191	0.411	0.38	0.453	0.433	0.437	0.431	0.482	0.515	0.233	0.216	0.249	0.311
155.25	0.213	0.214	0.242	0.191	0.409	0.381	0.455	0.432	0.438	0.431	0.482	0.517	0.234	0.215	0.247	0.308
155.5	0.215	0.215	0.244	0.194	0.413	0.384	0.457	0.435	0.438	0.433	0.485	0.519	0.235	0.218	0.249	0.312
155.75	0.211	0.213	0.243	0.193	0.41	0.383	0.456	0.434	0.44	0.433	0.485	0.518	0.232	0.215	0.247	0.31
156	0.211	0.213	0.242	0.191	0.41	0.382	0.457	0.435	0.439	0.433	0.487	0.521	0.235	0.215	0.249	0.309
156.25	0.211	0.212	0.24	0.191	0.41	0.384	0.458	0.435	0.441	0.433	0.487	0.518	0.232	0.214	0.246	0.309
156.5	0.211	0.213	0.241	0.191	0.412	0.385	0.458	0.435	0.444	0.435	0.488	0.521	0.232	0.216	0.247	0.311
156.75	0.21	0.212	0.24	0.191	0.412	0.385	0.458	0.437	0.443	0.437	0.489	0.521	0.231	0.216	0.247	0.31
157	0.21	0.213	0.24	0.189	0.413	0.387	0.459	0.435	0.444	0.436	0.488	0.522	0.232	0.217	0.249	0.31
157.25	0.211	0.215	0.239	0.189	0.413	0.387	0.46	0.438	0.444	0.438	0.491	0.524	0.234	0.217	0.247	0.311
157.5	0.209	0.213	0.241	0.188	0.413	0.388	0.461	0.438	0.445	0.439	0.49	0.524	0.233	0.218	0.249	0.313
157.75	0.209	0.214	0.241	0.189	0.415	0.389	0.463	0.44	0.446	0.44	0.493	0.526	0.233	0.216	0.247	0.311
158	0.212	0.216	0.243	0.189	0.417	0.391	0.466	0.442	0.449	0.441	0.496	0.527	0.235	0.218	0.249	0.311
158.25	0.214	0.218	0.244	0.193	0.421	0.394	0.468	0.445	0.45	0.444	0.495	0.532	0.236	0.22	0.248	0.314
158.5	0.218	0.219	0.247	0.196	0.425	0.396	0.471	0.448	0.45	0.447	0.498	0.535	0.235	0.221	0.25	0.317
158.75	0.219	0.219	0.245	0.194	0.427	0.398	0.472	0.449	0.453	0.447	0.501	0.535	0.237	0.221	0.252	0.318
159	0.217	0.22	0.247	0.197	0.427	0.399	0.475	0.451	0.455	0.45	0.501	0.538	0.238	0.221	0.253	0.319
159.25	0.216	0.22	0.249	0.197	0.426	0.398	0.476	0.451	0.454	0.45	0.501	0.538	0.236	0.218	0.252	0.316
159.5	0.22	0.223	0.249	0.197	0.431	0.402	0.478	0.455	0.457	0.452	0.504	0.542	0.237	0.223	0.255	0.32
159.75	0.221	0.221	0.25	0.196	0.434	0.404	0.479	0.454	0.459	0.454	0.506	0.544	0.238	0.224	0.257	0.32
160	0.221	0.221	0.251	0.199	0.435	0.404	0.481	0.458	0.46	0.455	0.507	0.544	0.241	0.224	0.257	0.32
160.25	0.218	0.223	0.249	0.199	0.432	0.403	0.484	0.458	0.459	0.455	0.506	0.546	0.239	0.222	0.256	0.32
160.5	0.219	0.224	0.251	0.199	0.434	0.406	0.482	0.459	0.461	0.457	0.509	0.547	0.239	0.224	0.255	0.322
160.75	0.217	0.221	0.25	0.196	0.432	0.405	0.484	0.459	0.461	0.457	0.509	0.547	0.236	0.222	0.255	0.32
161	0.219	0.222	0.25	0.197	0.434	0.407	0.483	0.458	0.462	0.455	0.511	0.546	0.237	0.221	0.252	0.322
161.25	0.219	0.222	0.249	0.196	0.436	0.407	0.484	0.459	0.465	0.456	0.511	0.548	0.236	0.221	0.255	0.322
161.5	0.219	0.222	0.249	0.197	0.437	0.409	0.485	0.46	0.466	0.459	0.513	0.548	0.238	0.22	0.256	0.322
161.75	0.219	0.222	0.247	0.196	0.439	0.409	0.487	0.461	0.465	0.457	0.513	0.551	0.239	0.218	0.256	0.321
162	0.218	0.222	0.247	0.196	0.438	0.412	0.488	0.462	0.466	0.46	0.514	0.552	0.238	0.223	0.255	0.319
162.25	0.219	0.223	0.247	0.196	0.438	0.411	0.488	0.463	0.467	0.46	0.514	0.551	0.24	0.219	0.256	0.323
162.5	0.221	0.222	0.249	0.194	0.441	0.413	0.489	0.464	0.468	0.462	0.516	0.552	0.238	0.22	0.256	0.323
162.75	0.22	0.223	0.25	0.197	0.443	0.415	0.494	0.467	0.47	0.465	0.516	0.554	0.24	0.222	0.259	0.326
163	0.221	0.225	0.252	0.201	0.445	0.415	0.494	0.469	0.472	0.467	0.521	0.559	0.24	0.223	0.258	0.325
163.25	0.221	0.225	0.252	0.2	0.447	0.417	0.497	0.472	0.473	0.468	0.521	0.561	0.24	0.222	0.259	0.326
163.5	0.222	0.225	0.254	0.203	0.447	0.418	0.5	0.473	0.474	0.469	0.523	0.563	0.242	0.225	0.258	0.327
163.75	0.225	0.228	0.253	0.202	0.45	0.421	0.5	0.474	0.475	0.471	0.523	0.564	0.242	0.224	0.261	0.329
164	0.225	0.227	0.258	0.201	0.452	0.423	0.503	0.477	0.476	0.474	0.525	0.565	0.243	0.227	0.259	0.33
164.25	0.225	0.229	0.257	0.203	0.452	0.422	0.503	0.477	0.479	0.474	0.526	0.566	0.242	0.227	0.259	0.329
164.5	0.229	0.23	0.258	0.203	0.458	0.426	0.507	0.48	0.482	0.476	0.529	0.571	0.245	0.228	0.265	0.331
164.75	0.228	0.231	0.259	0.204	0.46	0.428	0.508	0.481	0.481	0.477	0.531	0.571	0.246	0.229	0.264	0.334
165	0.228	0.231	0.26	0.203	0.459	0.427	0.51	0.484	0.483	0.48	0.53	0.575	0.244	0.228	0.263	0.334
165.25	0.224	0.229	0.258	0.205	0.459	0.426	0.511	0.485	0.485	0.48	0.533	0.572	0.246	0.228	0.262	0.332
165.5	0.226	0.23	0.258	0.205	0.459	0.428	0.511	0.484	0.484	0.48	0.532	0.575	0.244	0.226	0.26	0.332
165.75	0.225	0.228	0.255	0.203	0.46	0.429	0.512	0.483	0.483	0.481	0.532	0.575	0.243	0.228	0.26	0.332
166	0.225	0.229	0.257	0.204	0.459	0.429	0.513	0.484	0.487	0.481	0.534	0.576	0.243	0.226	0.261	0.331
166.25	0.227	0.23	0.255	0.202	0.46	0.43	0.513	0.484	0.488	0.481	0.535	0.576	0.246	0.226	0.261	0.329
166.5	0.227	0.231	0.256	0.202	0.462	0.431	0.514	0.487	0.489	0.484	0.536	0.577	0.248	0.226	0.262	0.332
166.75	0.227	0.23	0.257	0.204	0.461	0.433	0.517	0.487	0.488	0.484	0.536	0.58	0.249	0.227	0.262	0.332
167	0.227	0.229	0.257	0.202	0.463	0.434	0.518	0.489	0.491	0.486	0.537	0.58	0.248	0.226	0.262	0.332
167.25	0.227	0.232	0.255	0.202	0.465	0.435	0.518	0.488	0.492	0.487	0.54	0.58	0.247	0.224	0.261	0.331

## Sheet: Ext Fig_2c
Final OD730nm		LL12						HL1200
		LT	sll0518_A133V	pam68_S113G	rpaB_T183P			LT	sll0518_A133V	pam68_S113G	rpaB_T183P
		0.335	0.468	0.355	0.249			0.146	0.253	0.242	1.037
		0.335	0.465	0.345	0.258			0.148	0.261	0.244	1.041
		0.34	0.52	0.435	0.35			0.138	0.217	0.221	0.734
		0.365	0.521	0.46	0.357			0.138	0.224	0.225	0.745
		0.42	0.571	0.345	0.347			0.13	0.196	0.224	1.671
		0.435	0.593	0.34	0.327			0.131	0.199	0.224	1.645
		0.37	0.53	0.4	0.338			0.137	0.242	0.238	0.575
		0.38	0.533	0.39	0.331			0.136	0.237	0.239	0.573
Bonferroni & Holm p value:		LT	sll0518_A133V	pam68_S113G	rpaB_T183P			LT	sll0518_A133V	pam68_S113G	rpaB_T183P
*** p≤0.001	LT		4.1781e-07	0.601255	0.0384548		LT		0.839925	1.20736	9.9519e-08
** p≤0.01	sll0518_A133V	4.1781e-07		1.3229e-06	1.2447e-09		sll0518_A133V	0.839925		0.975005	6.6571e-07
* p≤0.05	pam68_S113G	0.601255	1.3229e-06		0.0163198		pam68_S113G	1.20736	0.975005		5.7811e-07
insignificant	rpaB_T183P	0.0384548	1.2447e-09	0.0163198			rpaB_T183P	9.9519e-08	6.6571e-07	5.7811e-07
	Group superscript	A	B	A	C		Group superscript	A	A	A	B
	Average	0.3725	0.484333	0.378333	0.285667		Average	0.138	0.243667	0.235667	0.937333
	SD	0.0380789	0.0309246	0.0493288	0.0558957		SD	0.0063471	0.0234379	0.012741	0.176103
	% to LT		1.30022	1.01566	0.76689		% to LT		1.7657	1.70773	6.79227
	Median	0.3675	0.5255	0.3725	0.3345		Median	0.1375	0.2305	0.2315	0.891
	Q1	0.33625	0.481	0.345	0.27525		Q1	0.13225	0.2035	0.224	0.61475
	Q3	0.41	0.5615	0.42625	0.34925		Q3	0.144	0.25025	0.24125	1.494
	1.5×IQR	0.110625	0.12075	0.121875	0.111		1.5×IQR	0.017625	0.070125	0.025875	1.31888

## Sheet: Ext Fig_2d
	under LL50																		under HL1200
genotype	LT				sll0518_A133V				pam68_S113G				rpaB_T183P					genotype	LT				sll0518_A133V				pam68_S113G				rpaB_T183P
replicate #	1	2	3	4	1	2	3	4	1	2	3	4	1	2	3	4		replicate #	1	2	3	4	1	2	3	4	1	2	3	4	1	2	3	4
time[h]																		time[h]
0	0.062	0.064	0.039	0.041	0.083	0.059	0.062	0.059	0.04	0.062	0.046	0.042	0.051	0.057	0.046	0.06		0	0.054	0.041	0.051	0.067	0.062	0.061	0.056	0.069	0.045	0.053	0.042	0.054	0.06	0.063	0.052	0.051
0.25	0.066	0.065	0.051	0.055	0.086	0.059	0.063	0.06	0.043	0.063	0.044	0.053	0.053	0.057	0.048	0.059		0.25	0.056	0.043	0.052	0.069	0.06	0.06	0.055	0.069	0.046	0.056	0.042	0.057	0.059	0.064	0.053	0.054
0.5	0.066	0.066	0.052	0.057	0.088	0.061	0.064	0.061	0.043	0.064	0.046	0.054	0.054	0.058	0.049	0.061		0.5	0.058	0.046	0.055	0.071	0.063	0.062	0.057	0.071	0.048	0.058	0.043	0.059	0.061	0.067	0.056	0.055
0.75	0.066	0.065	0.052	0.057	0.088	0.061	0.065	0.062	0.044	0.064	0.045	0.055	0.054	0.059	0.049	0.061		0.75	0.062	0.047	0.058	0.073	0.066	0.065	0.06	0.074	0.051	0.061	0.046	0.062	0.065	0.07	0.06	0.059
1	0.069	0.066	0.053	0.057	0.086	0.062	0.065	0.062	0.046	0.065	0.047	0.056	0.055	0.059	0.049	0.061		1	0.062	0.049	0.059	0.074	0.067	0.066	0.061	0.075	0.05	0.062	0.047	0.064	0.066	0.071	0.062	0.061
1.25	0.069	0.066	0.053	0.058	0.087	0.062	0.065	0.063	0.047	0.067	0.047	0.056	0.054	0.059	0.049	0.062		1.25	0.064	0.05	0.06	0.076	0.069	0.067	0.063	0.077	0.052	0.063	0.05	0.065	0.069	0.074	0.065	0.065
1.5	0.069	0.067	0.054	0.058	0.088	0.062	0.066	0.063	0.048	0.067	0.048	0.057	0.055	0.058	0.049	0.061		1.5	0.064	0.05	0.061	0.076	0.069	0.068	0.063	0.077	0.053	0.064	0.049	0.067	0.071	0.074	0.065	0.066
1.75	0.069	0.067	0.053	0.059	0.089	0.063	0.067	0.063	0.048	0.067	0.047	0.057	0.057	0.06	0.05	0.063		1.75	0.067	0.053	0.064	0.078	0.071	0.069	0.064	0.078	0.054	0.066	0.051	0.068	0.073	0.078	0.068	0.069
2	0.07	0.067	0.053	0.057	0.089	0.062	0.067	0.064	0.049	0.067	0.048	0.058	0.057	0.06	0.05	0.064		2	0.068	0.053	0.063	0.079	0.07	0.069	0.064	0.079	0.055	0.066	0.052	0.069	0.074	0.078	0.069	0.07
2.25	0.072	0.068	0.054	0.058	0.089	0.063	0.066	0.063	0.05	0.067	0.049	0.058	0.057	0.059	0.05	0.063		2.25	0.07	0.054	0.065	0.08	0.071	0.069	0.065	0.08	0.057	0.067	0.053	0.07	0.075	0.078	0.07	0.071
2.5	0.073	0.068	0.055	0.058	0.089	0.066	0.068	0.063	0.05	0.068	0.049	0.059	0.058	0.058	0.051	0.063		2.5	0.07	0.055	0.065	0.081	0.075	0.07	0.067	0.081	0.057	0.067	0.053	0.07	0.078	0.083	0.073	0.075
2.75	0.072	0.068	0.054	0.058	0.09	0.066	0.068	0.064	0.051	0.068	0.049	0.058	0.058	0.059	0.05	0.063		2.75	0.073	0.056	0.067	0.082	0.075	0.072	0.067	0.081	0.057	0.069	0.054	0.071	0.078	0.083	0.075	0.078
3	0.072	0.068	0.055	0.059	0.089	0.066	0.067	0.064	0.051	0.068	0.048	0.058	0.056	0.059	0.05	0.063		3	0.073	0.057	0.068	0.082	0.074	0.071	0.066	0.081	0.058	0.07	0.055	0.072	0.078	0.083	0.074	0.077
3.25	0.073	0.068	0.056	0.06	0.09	0.067	0.067	0.063	0.051	0.068	0.05	0.058	0.057	0.059	0.05	0.064		3.25	0.072	0.056	0.068	0.082	0.075	0.073	0.067	0.082	0.058	0.068	0.053	0.072	0.08	0.084	0.075	0.078
3.5	0.071	0.068	0.054	0.059	0.089	0.066	0.067	0.063	0.05	0.068	0.048	0.057	0.055	0.057	0.05	0.063		3.5	0.075	0.058	0.07	0.084	0.075	0.072	0.067	0.082	0.06	0.072	0.056	0.073	0.08	0.083	0.075	0.079
3.75	0.071	0.069	0.055	0.059	0.09	0.067	0.068	0.064	0.05	0.069	0.049	0.058	0.057	0.059	0.05	0.063		3.75	0.077	0.058	0.071	0.085	0.075	0.072	0.068	0.082	0.062	0.075	0.057	0.075	0.081	0.084	0.076	0.081
4	0.074	0.068	0.056	0.059	0.09	0.068	0.068	0.065	0.052	0.069	0.051	0.059	0.056	0.06	0.05	0.063		4	0.077	0.061	0.073	0.086	0.073	0.072	0.066	0.081	0.061	0.074	0.058	0.075	0.079	0.082	0.074	0.079
4.25	0.075	0.069	0.057	0.06	0.088	0.066	0.067	0.063	0.053	0.07	0.05	0.06	0.054	0.058	0.049	0.062		4.25	0.078	0.06	0.071	0.087	0.075	0.073	0.067	0.082	0.062	0.074	0.058	0.075	0.081	0.084	0.076	0.08
4.5	0.074	0.069	0.056	0.06	0.089	0.067	0.068	0.064	0.052	0.069	0.051	0.06	0.056	0.059	0.05	0.063		4.5	0.077	0.061	0.072	0.086	0.076	0.073	0.068	0.083	0.063	0.075	0.058	0.076	0.081	0.085	0.076	0.08
4.75	0.074	0.069	0.058	0.06	0.089	0.067	0.066	0.065	0.054	0.071	0.051	0.059	0.055	0.058	0.049	0.061		4.75	0.078	0.06	0.072	0.087	0.075	0.074	0.068	0.082	0.063	0.074	0.059	0.077	0.08	0.084	0.075	0.08
5	0.075	0.069	0.057	0.06	0.09	0.068	0.068	0.065	0.053	0.071	0.052	0.06	0.057	0.06	0.05	0.062		5	0.077	0.061	0.072	0.086	0.078	0.074	0.069	0.084	0.064	0.075	0.057	0.076	0.083	0.086	0.077	0.082
5.25	0.073	0.07	0.057	0.06	0.091	0.068	0.069	0.067	0.051	0.07	0.05	0.06	0.058	0.059	0.052	0.063		5.25	0.078	0.06	0.073	0.087	0.076	0.075	0.068	0.084	0.063	0.074	0.058	0.076	0.081	0.085	0.076	0.081
5.5	0.072	0.069	0.058	0.06	0.09	0.068	0.069	0.066	0.052	0.069	0.051	0.059	0.057	0.059	0.051	0.062		5.5	0.077	0.06	0.072	0.088	0.078	0.075	0.07	0.085	0.064	0.075	0.058	0.076	0.083	0.086	0.077	0.082
5.75	0.072	0.069	0.057	0.06	0.091	0.068	0.069	0.066	0.05	0.069	0.05	0.059	0.058	0.059	0.051	0.063		5.75	0.077	0.061	0.074	0.089	0.079	0.077	0.07	0.086	0.064	0.075	0.058	0.076	0.084	0.087	0.077	0.081
6	0.072	0.07	0.057	0.059	0.092	0.068	0.069	0.066	0.05	0.069	0.049	0.058	0.059	0.06	0.051	0.064		6	0.077	0.061	0.074	0.088	0.077	0.075	0.07	0.085	0.064	0.075	0.059	0.077	0.083	0.086	0.079	0.082
6.25	0.072	0.069	0.056	0.059	0.092	0.069	0.07	0.066	0.05	0.069	0.048	0.058	0.058	0.06	0.052	0.064		6.25	0.077	0.061	0.074	0.088	0.08	0.076	0.071	0.087	0.064	0.074	0.059	0.077	0.085	0.088	0.078	0.083
6.5	0.072	0.069	0.056	0.06	0.093	0.069	0.07	0.067	0.05	0.07	0.049	0.059	0.059	0.061	0.052	0.064		6.5	0.076	0.062	0.074	0.088	0.081	0.078	0.073	0.088	0.064	0.075	0.058	0.076	0.086	0.09	0.079	0.085
6.75	0.073	0.069	0.056	0.06	0.092	0.07	0.071	0.067	0.049	0.069	0.048	0.059	0.06	0.061	0.052	0.064		6.75	0.077	0.061	0.073	0.088	0.079	0.077	0.071	0.087	0.064	0.074	0.058	0.076	0.085	0.089	0.078	0.083
7	0.073	0.07	0.057	0.061	0.092	0.071	0.071	0.068	0.05	0.069	0.05	0.059	0.059	0.061	0.052	0.065		7	0.076	0.062	0.073	0.088	0.082	0.079	0.073	0.088	0.064	0.075	0.058	0.076	0.087	0.091	0.08	0.085
7.25	0.07	0.069	0.055	0.06	0.094	0.07	0.071	0.067	0.048	0.069	0.049	0.058	0.061	0.061	0.053	0.065		7.25	0.076	0.062	0.072	0.087	0.081	0.078	0.073	0.087	0.065	0.074	0.058	0.075	0.086	0.09	0.079	0.085
7.5	0.071	0.07	0.055	0.061	0.092	0.071	0.071	0.068	0.048	0.069	0.048	0.059	0.059	0.061	0.052	0.064		7.5	0.076	0.061	0.074	0.089	0.081	0.079	0.073	0.088	0.065	0.075	0.059	0.078	0.088	0.091	0.08	0.086
7.75	0.072	0.07	0.055	0.061	0.095	0.071	0.073	0.068	0.049	0.069	0.049	0.059	0.061	0.062	0.053	0.065		7.75	0.076	0.063	0.073	0.087	0.082	0.08	0.074	0.088	0.065	0.074	0.059	0.077	0.089	0.091	0.08	0.085
8	0.071	0.07	0.055	0.062	0.093	0.071	0.072	0.067	0.047	0.069	0.048	0.059	0.06	0.061	0.052	0.065		8	0.075	0.062	0.073	0.088	0.079	0.08	0.073	0.087	0.064	0.074	0.059	0.078	0.088	0.09	0.079	0.085
8.25	0.071	0.07	0.055	0.061	0.093	0.072	0.072	0.068	0.048	0.069	0.049	0.058	0.059	0.061	0.052	0.065		8.25	0.076	0.063	0.075	0.088	0.083	0.081	0.075	0.089	0.064	0.076	0.06	0.078	0.09	0.093	0.082	0.088
8.5	0.073	0.071	0.056	0.062	0.094	0.072	0.072	0.068	0.05	0.071	0.049	0.059	0.061	0.061	0.053	0.065		8.5	0.077	0.063	0.074	0.089	0.082	0.08	0.075	0.089	0.065	0.075	0.06	0.077	0.089	0.092	0.08	0.086
8.75	0.072	0.071	0.056	0.061	0.094	0.071	0.072	0.069	0.05	0.071	0.05	0.059	0.061	0.062	0.052	0.065		8.75	0.078	0.064	0.076	0.089	0.082	0.081	0.075	0.089	0.065	0.077	0.061	0.08	0.09	0.092	0.08	0.087
9	0.073	0.071	0.058	0.062	0.094	0.073	0.072	0.068	0.05	0.072	0.049	0.059	0.06	0.061	0.053	0.064		9	0.079	0.063	0.076	0.09	0.081	0.081	0.074	0.088	0.067	0.077	0.062	0.081	0.09	0.092	0.08	0.086
9.25	0.075	0.072	0.058	0.062	0.094	0.073	0.072	0.068	0.052	0.072	0.05	0.06	0.061	0.061	0.053	0.064		9.25	0.077	0.064	0.074	0.088	0.081	0.081	0.074	0.088	0.067	0.076	0.061	0.082	0.089	0.093	0.079	0.086
9.5	0.074	0.072	0.057	0.062	0.09	0.071	0.069	0.067	0.051	0.071	0.051	0.06	0.055	0.059	0.05	0.063		9.5	0.08	0.065	0.077	0.092	0.078	0.08	0.072	0.087	0.068	0.079	0.064	0.081	0.087	0.088	0.078	0.083
9.75	0.072	0.073	0.058	0.062	0.089	0.07	0.068	0.067	0.05	0.072	0.051	0.06	0.053	0.058	0.048	0.062		9.75	0.08	0.066	0.078	0.092	0.075	0.079	0.071	0.085	0.069	0.078	0.063	0.082	0.086	0.086	0.075	0.083
10	0.074	0.073	0.059	0.062	0.09	0.071	0.069	0.067	0.051	0.071	0.051	0.061	0.055	0.06	0.05	0.062		10	0.081	0.066	0.078	0.093	0.077	0.079	0.072	0.087	0.069	0.08	0.065	0.083	0.087	0.088	0.075	0.083
10.25	0.075	0.073	0.059	0.064	0.09	0.072	0.069	0.067	0.052	0.072	0.052	0.062	0.055	0.059	0.05	0.062		10.25	0.082	0.066	0.079	0.092	0.077	0.08	0.071	0.087	0.071	0.08	0.065	0.083	0.09	0.089	0.076	0.084
10.5	0.076	0.073	0.059	0.063	0.092	0.072	0.071	0.068	0.052	0.072	0.052	0.062	0.058	0.061	0.051	0.063		10.5	0.081	0.065	0.077	0.091	0.08	0.081	0.073	0.089	0.07	0.078	0.065	0.082	0.091	0.091	0.078	0.086
10.75	0.074	0.074	0.059	0.064	0.093	0.073	0.071	0.069	0.052	0.072	0.053	0.061	0.057	0.061	0.052	0.064		10.75	0.081	0.067	0.079	0.094	0.08	0.082	0.074	0.089	0.071	0.08	0.067	0.084	0.092	0.092	0.079	0.086
11	0.075	0.073	0.06	0.064	0.094	0.073	0.071	0.069	0.052	0.073	0.052	0.063	0.058	0.061	0.051	0.064		11	0.083	0.069	0.079	0.092	0.082	0.084	0.074	0.09	0.07	0.08	0.066	0.085	0.092	0.091	0.079	0.086
11.25	0.077	0.074	0.06	0.065	0.095	0.074	0.073	0.069	0.054	0.073	0.054	0.063	0.06	0.062	0.053	0.065		11.25	0.084	0.069	0.079	0.095	0.084	0.085	0.076	0.092	0.073	0.083	0.067	0.087	0.094	0.095	0.081	0.089
11.5	0.075	0.074	0.06	0.065	0.097	0.074	0.073	0.07	0.053	0.074	0.053	0.062	0.061	0.063	0.054	0.066		11.5	0.085	0.069	0.08	0.094	0.085	0.085	0.076	0.093	0.07	0.081	0.066	0.085	0.095	0.095	0.08	0.088
11.75	0.076	0.074	0.06	0.065	0.094	0.074	0.073	0.07	0.053	0.074	0.054	0.063	0.059	0.062	0.054	0.065		11.75	0.084	0.069	0.08	0.095	0.088	0.087	0.078	0.094	0.073	0.083	0.066	0.087	0.097	0.098	0.083	0.091
12	0.077	0.074	0.061	0.064	0.098	0.075	0.074	0.071	0.054	0.074	0.053	0.063	0.064	0.063	0.055	0.067		12	0.085	0.07	0.081	0.095	0.087	0.087	0.077	0.095	0.074	0.084	0.069	0.087	0.096	0.098	0.082	0.091
12.25	0.077	0.072	0.061	0.064	0.099	0.076	0.076	0.072	0.055	0.074	0.054	0.064	0.064	0.065	0.056	0.068		12.25	0.087	0.072	0.084	0.098	0.091	0.091	0.08	0.096	0.077	0.085	0.07	0.088	0.099	0.1	0.085	0.093
12.5	0.077	0.074	0.062	0.065	0.099	0.076	0.075	0.072	0.054	0.075	0.054	0.064	0.064	0.065	0.056	0.068		12.5	0.086	0.071	0.083	0.096	0.09	0.089	0.08	0.097	0.076	0.085	0.069	0.088	0.099	0.099	0.085	0.094
12.75	0.077	0.073	0.063	0.066	0.099	0.076	0.076	0.074	0.055	0.075	0.054	0.065	0.065	0.065	0.057	0.068		12.75	0.087	0.073	0.085	0.099	0.09	0.091	0.08	0.096	0.076	0.087	0.07	0.09	0.1	0.1	0.085	0.094
13	0.08	0.075	0.063	0.066	0.101	0.079	0.077	0.073	0.058	0.077	0.057	0.066	0.066	0.066	0.057	0.069		13	0.088	0.074	0.086	0.098	0.091	0.091	0.082	0.098	0.077	0.087	0.073	0.09	0.102	0.102	0.085	0.095
13.25	0.08	0.075	0.063	0.067	0.102	0.079	0.078	0.073	0.058	0.076	0.057	0.066	0.067	0.067	0.059	0.069		13.25	0.09	0.075	0.086	0.1	0.093	0.092	0.082	0.098	0.08	0.089	0.072	0.093	0.102	0.103	0.086	0.096
13.5	0.079	0.075	0.063	0.066	0.103	0.079	0.079	0.075	0.057	0.077	0.056	0.065	0.068	0.067	0.058	0.07		13.5	0.09	0.074	0.088	0.101	0.094	0.094	0.083	0.101	0.079	0.089	0.074	0.093	0.103	0.105	0.087	0.097
13.75	0.081	0.075	0.064	0.067	0.1	0.078	0.078	0.074	0.058	0.078	0.057	0.068	0.065	0.066	0.058	0.07		13.75	0.089	0.075	0.086	0.099	0.095	0.094	0.083	0.1	0.078	0.088	0.075	0.092	0.104	0.104	0.088	0.098
14	0.082	0.076	0.065	0.067	0.103	0.08	0.079	0.074	0.06	0.079	0.058	0.068	0.069	0.067	0.059	0.071		14	0.09	0.076	0.086	0.1	0.095	0.095	0.086	0.101	0.079	0.089	0.075	0.094	0.105	0.107	0.087	0.099
14.25	0.081	0.076	0.065	0.067	0.103	0.08	0.078	0.075	0.06	0.077	0.059	0.068	0.068	0.067	0.059	0.07		14.25	0.091	0.077	0.088	0.101	0.094	0.095	0.085	0.101	0.079	0.09	0.075	0.093	0.106	0.107	0.089	0.099
14.5	0.084	0.076	0.066	0.068	0.102	0.08	0.078	0.074	0.062	0.08	0.059	0.069	0.066	0.068	0.058	0.07		14.5	0.093	0.079	0.088	0.103	0.097	0.096	0.086	0.103	0.082	0.091	0.076	0.096	0.107	0.109	0.09	0.099
14.75	0.083	0.077	0.066	0.069	0.102	0.08	0.078	0.075	0.061	0.078	0.059	0.068	0.067	0.068	0.058	0.071		14.75	0.092	0.078	0.088	0.102	0.096	0.096	0.086	0.103	0.081	0.092	0.078	0.096	0.107	0.109	0.09	0.101
15	0.082	0.076	0.065	0.068	0.102	0.079	0.078	0.074	0.061	0.078	0.058	0.069	0.066	0.066	0.057	0.069		15	0.095	0.079	0.089	0.103	0.096	0.095	0.086	0.103	0.081	0.093	0.079	0.097	0.107	0.107	0.09	0.1
15.25	0.081	0.076	0.066	0.069	0.097	0.079	0.074	0.073	0.059	0.079	0.059	0.068	0.061	0.064	0.055	0.067		15.25	0.094	0.08	0.09	0.104	0.091	0.095	0.082	0.099	0.083	0.092	0.078	0.097	0.103	0.103	0.085	0.096
15.5	0.082	0.077	0.066	0.069	0.097	0.078	0.074	0.073	0.06	0.078	0.059	0.068	0.06	0.064	0.055	0.066		15.5	0.095	0.08	0.09	0.103	0.091	0.095	0.081	0.101	0.084	0.093	0.079	0.098	0.104	0.102	0.086	0.097
15.75	0.083	0.076	0.065	0.069	0.094	0.078	0.072	0.073	0.061	0.08	0.059	0.068	0.057	0.063	0.053	0.065		15.75	0.095	0.08	0.09	0.104	0.09	0.095	0.08	0.1	0.086	0.093	0.08	0.099	0.104	0.102	0.085	0.097
16	0.082	0.077	0.066	0.069	0.095	0.078	0.073	0.072	0.059	0.079	0.06	0.068	0.056	0.063	0.053	0.065		16	0.095	0.08	0.089	0.104	0.086	0.094	0.08	0.097	0.082	0.093	0.078	0.1	0.104	0.099	0.083	0.095
16.25	0.083	0.077	0.066	0.069	0.096	0.078	0.075	0.073	0.06	0.079	0.058	0.068	0.058	0.063	0.054	0.065		16.25	0.094	0.081	0.089	0.103	0.088	0.095	0.08	0.099	0.083	0.093	0.079	0.099	0.102	0.102	0.084	0.095
16.5	0.079	0.076	0.064	0.068	0.096	0.079	0.075	0.073	0.058	0.078	0.059	0.068	0.058	0.064	0.055	0.066		16.5	0.094	0.082	0.091	0.105	0.091	0.097	0.082	0.101	0.084	0.094	0.08	0.1	0.107	0.105	0.087	0.099
16.75	0.081	0.077	0.065	0.068	0.097	0.08	0.075	0.073	0.058	0.079	0.058	0.067	0.061	0.065	0.056	0.067		16.75	0.091	0.082	0.09	0.103	0.096	0.099	0.086	0.104	0.082	0.093	0.079	0.098	0.11	0.109	0.09	0.101
17	0.079	0.076	0.064	0.069	0.1	0.081	0.077	0.074	0.056	0.078	0.058	0.066	0.063	0.066	0.058	0.068		17	0.092	0.08	0.09	0.104	0.098	0.1	0.088	0.106	0.083	0.091	0.079	0.098	0.112	0.111	0.09	0.104
17.25	0.077	0.076	0.063	0.068	0.102	0.081	0.079	0.076	0.053	0.076	0.057	0.066	0.065	0.067	0.058	0.07		17.25	0.09	0.08	0.089	0.102	0.094	0.099	0.086	0.104	0.081	0.089	0.079	0.097	0.11	0.11	0.089	0.101
17.5	0.078	0.076	0.062	0.068	0.103	0.082	0.079	0.077	0.053	0.077	0.057	0.066	0.065	0.068	0.059	0.071		17.5	0.092	0.081	0.09	0.101	0.101	0.103	0.088	0.107	0.083	0.091	0.081	0.096	0.114	0.113	0.093	0.106
17.75	0.079	0.076	0.063	0.068	0.103	0.082	0.08	0.077	0.054	0.078	0.057	0.065	0.068	0.068	0.06	0.071		17.75	0.092	0.079	0.09	0.103	0.099	0.103	0.09	0.107	0.083	0.09	0.08	0.097	0.114	0.115	0.092	0.106
18	0.081	0.078	0.064	0.069	0.103	0.083	0.082	0.077	0.055	0.077	0.058	0.066	0.067	0.07	0.06	0.072		18	0.093	0.08	0.091	0.105	0.101	0.103	0.093	0.11	0.084	0.092	0.08	0.098	0.115	0.114	0.094	0.106
18.25	0.082	0.078	0.064	0.069	0.105	0.083	0.081	0.078	0.057	0.078	0.058	0.068	0.069	0.069	0.061	0.072		18.25	0.094	0.082	0.094	0.106	0.1	0.105	0.091	0.109	0.087	0.094	0.082	0.101	0.116	0.113	0.094	0.106
18.5	0.081	0.078	0.064	0.07	0.105	0.085	0.082	0.077	0.059	0.079	0.06	0.068	0.07	0.07	0.061	0.073		18.5	0.098	0.082	0.094	0.107	0.103	0.106	0.094	0.111	0.087	0.094	0.084	0.102	0.117	0.118	0.096	0.11
18.75	0.081	0.078	0.065	0.07	0.107	0.084	0.084	0.078	0.058	0.079	0.059	0.067	0.071	0.071	0.063	0.074		18.75	0.098	0.082	0.092	0.108	0.105	0.105	0.093	0.112	0.088	0.096	0.084	0.103	0.117	0.12	0.098	0.11
19	0.083	0.078	0.065	0.07	0.107	0.084	0.082	0.079	0.059	0.08	0.061	0.068	0.071	0.072	0.063	0.073		19	0.095	0.082	0.094	0.106	0.105	0.107	0.094	0.112	0.084	0.092	0.084	0.101	0.119	0.118	0.098	0.113
19.25	0.082	0.078	0.065	0.07	0.106	0.084	0.083	0.079	0.057	0.079	0.059	0.067	0.071	0.071	0.063	0.074		19.25	0.098	0.083	0.092	0.108	0.105	0.107	0.094	0.113	0.087	0.096	0.084	0.102	0.118	0.12	0.097	0.111
19.5	0.081	0.078	0.065	0.07	0.106	0.084	0.082	0.079	0.057	0.079	0.059	0.067	0.07	0.071	0.063	0.073		19.5	0.096	0.082	0.092	0.107	0.107	0.108	0.093	0.113	0.088	0.094	0.084	0.099	0.119	0.122	0.098	0.113
19.75	0.082	0.079	0.065	0.071	0.108	0.085	0.084	0.079	0.057	0.08	0.06	0.068	0.074	0.072	0.064	0.075		19.75	0.093	0.081	0.094	0.106	0.106	0.11	0.096	0.115	0.088	0.094	0.083	0.101	0.121	0.121	0.1	0.113
20	0.083	0.078	0.065	0.07	0.108	0.085	0.084	0.08	0.056	0.079	0.059	0.067	0.072	0.072	0.064	0.076		20	0.096	0.083	0.095	0.107	0.105	0.11	0.095	0.113	0.087	0.094	0.086	0.103	0.121	0.121	0.098	0.114
20.25	0.079	0.078	0.064	0.07	0.108	0.086	0.086	0.081	0.055	0.078	0.059	0.067	0.074	0.073	0.065	0.076		20.25	0.097	0.083	0.094	0.108	0.11	0.11	0.096	0.115	0.088	0.094	0.084	0.104	0.125	0.124	0.1	0.116
20.5	0.081	0.078	0.065	0.071	0.109	0.087	0.086	0.081	0.057	0.079	0.06	0.068	0.075	0.073	0.065	0.076		20.5	0.096	0.083	0.094	0.107	0.11	0.112	0.096	0.116	0.086	0.093	0.085	0.106	0.124	0.126	0.101	0.116
20.75	0.081	0.079	0.066	0.07	0.107	0.085	0.084	0.08	0.055	0.08	0.06	0.067	0.07	0.072	0.063	0.074		20.75	0.094	0.086	0.093	0.108	0.109	0.112	0.098	0.118	0.086	0.093	0.086	0.105	0.125	0.127	0.1	0.118
21	0.077	0.078	0.063	0.07	0.105	0.086	0.082	0.079	0.054	0.078	0.059	0.067	0.068	0.07	0.062	0.073		21	0.095	0.085	0.092	0.106	0.106	0.109	0.093	0.111	0.088	0.094	0.085	0.103	0.124	0.121	0.098	0.112
21.25	0.079	0.079	0.065	0.071	0.103	0.085	0.081	0.08	0.055	0.079	0.059	0.067	0.064	0.069	0.06	0.071		21.25	0.095	0.084	0.096	0.11	0.104	0.11	0.093	0.113	0.089	0.096	0.087	0.105	0.125	0.121	0.098	0.113
21.5	0.081	0.079	0.065	0.07	0.102	0.085	0.082	0.08	0.055	0.08	0.059	0.068	0.062	0.068	0.059	0.07		21.5	0.098	0.084	0.094	0.11	0.1	0.109	0.091	0.108	0.087	0.095	0.086	0.105	0.123	0.118	0.096	0.111
21.75	0.079	0.079	0.064	0.071	0.101	0.085	0.08	0.079	0.054	0.079	0.06	0.067	0.062	0.069	0.06	0.07		21.75	0.097	0.083	0.096	0.11	0.1	0.107	0.091	0.109	0.09	0.096	0.088	0.109	0.123	0.118	0.094	0.112
22	0.077	0.079	0.063	0.07	0.103	0.086	0.082	0.08	0.053	0.079	0.059	0.067	0.065	0.07	0.061	0.072		22	0.097	0.086	0.096	0.11	0.103	0.109	0.092	0.114	0.089	0.096	0.088	0.105	0.123	0.122	0.098	0.115
22.25	0.08	0.078	0.064	0.071	0.104	0.085	0.082	0.081	0.053	0.079	0.059	0.067	0.065	0.07	0.06	0.071		22.25	0.097	0.084	0.096	0.11	0.103	0.108	0.091	0.113	0.09	0.096	0.088	0.105	0.123	0.12	0.096	0.113
22.5	0.078	0.079	0.064	0.072	0.105	0.086	0.083	0.081	0.053	0.079	0.059	0.066	0.067	0.071	0.062	0.073		22.5	0.094	0.087	0.096	0.108	0.109	0.112	0.093	0.116	0.088	0.095	0.089	0.107	0.126	0.123	0.1	0.118
22.75	0.079	0.079	0.063	0.071	0.107	0.087	0.084	0.081	0.053	0.078	0.059	0.066	0.069	0.072	0.063	0.075		22.75	0.095	0.086	0.095	0.109	0.108	0.112	0.094	0.116	0.089	0.095	0.089	0.111	0.128	0.127	0.1	0.119
23	0.078	0.079	0.063	0.071	0.108	0.088	0.085	0.082	0.053	0.078	0.059	0.067	0.07	0.072	0.063	0.074		23	0.093	0.085	0.093	0.107	0.107	0.113	0.094	0.118	0.088	0.092	0.088	0.108	0.127	0.128	0.1	0.12
23.25	0.076	0.079	0.063	0.071	0.109	0.088	0.087	0.084	0.051	0.078	0.059	0.066	0.071	0.074	0.064	0.075		23.25	0.095	0.087	0.094	0.11	0.109	0.114	0.096	0.116	0.09	0.094	0.087	0.107	0.132	0.127	0.101	0.122
23.5	0.077	0.079	0.063	0.071	0.11	0.089	0.087	0.084	0.052	0.078	0.059	0.065	0.073	0.074	0.065	0.076		23.5	0.093	0.086	0.093	0.107	0.113	0.116	0.096	0.118	0.09	0.093	0.089	0.108	0.133	0.132	0.103	0.122
23.75	0.076	0.079	0.063	0.071	0.109	0.089	0.087	0.084	0.049	0.078	0.059	0.065	0.071	0.073	0.065	0.076		23.75	0.09	0.086	0.092	0.108	0.112	0.117	0.095	0.119	0.086	0.092	0.087	0.105	0.135	0.131	0.103	0.121
24	0.074	0.08	0.062	0.071	0.11	0.09	0.087	0.084	0.049	0.078	0.058	0.065	0.072	0.074	0.064	0.076		24	0.093	0.087	0.093	0.108	0.113	0.114	0.096	0.118	0.089	0.092	0.088	0.108	0.133	0.132	0.105	0.121
24.25	0.078	0.08	0.063	0.072	0.109	0.089	0.087	0.084	0.052	0.08	0.059	0.067	0.071	0.073	0.065	0.076		24.25	0.095	0.087	0.093	0.11	0.113	0.117	0.098	0.12	0.091	0.094	0.088	0.111	0.136	0.133	0.107	0.123
24.5	0.078	0.08	0.064	0.072	0.109	0.091	0.087	0.084	0.051	0.08	0.06	0.066	0.071	0.074	0.065	0.075		24.5	0.093	0.085	0.093	0.109	0.114	0.117	0.098	0.12	0.09	0.094	0.089	0.11	0.138	0.136	0.105	0.124
24.75	0.076	0.08	0.062	0.071	0.11	0.089	0.088	0.085	0.048	0.078	0.059	0.066	0.072	0.075	0.065	0.076		24.75	0.094	0.087	0.093	0.107	0.116	0.117	0.099	0.121	0.092	0.095	0.089	0.111	0.138	0.138	0.106	0.126
25	0.076	0.079	0.062	0.071	0.113	0.091	0.09	0.086	0.049	0.078	0.059	0.066	0.075	0.077	0.068	0.078		25	0.095	0.088	0.093	0.108	0.115	0.119	0.097	0.121	0.091	0.094	0.091	0.111	0.139	0.138	0.106	0.126
25.25	0.077	0.081	0.063	0.073	0.112	0.09	0.089	0.086	0.05	0.08	0.059	0.066	0.073	0.076	0.067	0.077		25.25	0.094	0.086	0.093	0.108	0.114	0.118	0.099	0.12	0.089	0.094	0.089	0.111	0.141	0.138	0.108	0.126
25.5	0.077	0.081	0.064	0.073	0.114	0.092	0.091	0.087	0.05	0.08	0.06	0.067	0.076	0.077	0.069	0.078		25.5	0.094	0.086	0.095	0.11	0.116	0.12	0.098	0.121	0.092	0.094	0.091	0.112	0.14	0.141	0.109	0.128
25.75	0.078	0.08	0.064	0.073	0.113	0.092	0.091	0.087	0.051	0.08	0.059	0.067	0.075	0.076	0.067	0.078		25.75	0.095	0.088	0.093	0.11	0.115	0.121	0.098	0.121	0.091	0.096	0.091	0.112	0.142	0.14	0.11	0.129
26	0.077	0.081	0.063	0.073	0.114	0.093	0.091	0.088	0.05	0.08	0.059	0.067	0.076	0.077	0.07	0.08		26	0.097	0.089	0.095	0.11	0.117	0.12	0.099	0.122	0.092	0.096	0.09	0.112	0.145	0.143	0.111	0.13
26.25	0.075	0.08	0.063	0.071	0.115	0.093	0.092	0.087	0.048	0.079	0.06	0.065	0.078	0.078	0.069	0.08		26.25	0.093	0.087	0.094	0.108	0.117	0.122	0.1	0.123	0.09	0.095	0.091	0.113	0.144	0.144	0.109	0.131
26.5	0.074	0.081	0.063	0.073	0.115	0.092	0.094	0.09	0.047	0.08	0.059	0.065	0.078	0.078	0.07	0.08		26.5	0.093	0.087	0.093	0.108	0.12	0.122	0.101	0.123	0.091	0.095	0.092	0.114	0.146	0.145	0.113	0.133
26.75	0.076	0.082	0.064	0.074	0.116	0.093	0.093	0.088	0.049	0.079	0.06	0.066	0.077	0.078	0.07	0.08		26.75	0.094	0.087	0.094	0.109	0.118	0.12	0.101	0.122	0.092	0.094	0.093	0.112	0.146	0.145	0.109	0.135
27	0.075	0.082	0.063	0.073	0.115	0.093	0.093	0.089	0.049	0.08	0.06	0.067	0.078	0.078	0.07	0.081		27	0.095	0.088	0.093	0.109	0.12	0.122	0.101	0.127	0.092	0.096	0.091	0.114	0.146	0.145	0.112	0.137
27.25	0.076	0.083	0.064	0.074	0.117	0.095	0.094	0.089	0.05	0.08	0.06	0.067	0.079	0.078	0.07	0.081		27.25	0.096	0.087	0.095	0.108	0.121	0.122	0.099	0.123	0.093	0.096	0.092	0.115	0.148	0.146	0.111	0.135
27.5	0.079	0.082	0.064	0.075	0.117	0.094	0.095	0.09	0.052	0.082	0.061	0.067	0.08	0.08	0.071	0.082		27.5	0.093	0.087	0.093	0.108	0.122	0.121	0.104	0.123	0.092	0.093	0.091	0.114	0.151	0.151	0.114	0.15
27.75	0.079	0.083	0.065	0.074	0.118	0.095	0.094	0.09	0.052	0.082	0.062	0.068	0.08	0.079	0.071	0.082		27.75	0.093	0.088	0.092	0.109	0.12	0.123	0.103	0.125	0.094	0.097	0.092	0.116	0.153	0.154	0.113	0.152
28	0.077	0.083	0.065	0.074	0.118	0.094	0.095	0.09	0.05	0.081	0.062	0.068	0.08	0.079	0.071	0.081		28	0.095	0.088	0.096	0.109	0.122	0.123	0.102	0.123	0.095	0.096	0.093	0.116	0.151	0.153	0.114	0.153
28.25	0.076	0.082	0.065	0.074	0.115	0.094	0.094	0.09	0.05	0.081	0.062	0.067	0.077	0.078	0.071	0.08		28.25	0.092	0.086	0.094	0.107	0.12	0.122	0.101	0.125	0.093	0.094	0.093	0.113	0.153	0.154	0.115	0.154
28.5	0.079	0.082	0.065	0.075	0.117	0.095	0.094	0.091	0.052	0.081	0.062	0.067	0.08	0.08	0.071	0.083		28.5	0.096	0.086	0.094	0.109	0.118	0.125	0.103	0.125	0.094	0.096	0.092	0.118	0.152	0.155	0.114	0.152
28.75	0.08	0.083	0.067	0.077	0.118	0.096	0.096	0.092	0.052	0.083	0.062	0.068	0.078	0.081	0.072	0.083		28.75	0.091	0.084	0.092	0.108	0.12	0.122	0.1	0.126	0.092	0.095	0.094	0.117	0.154	0.154	0.115	0.155
29	0.075	0.082	0.063	0.074	0.119	0.096	0.096	0.092	0.048	0.08	0.06	0.066	0.08	0.08	0.072	0.082		29	0.093	0.084	0.095	0.108	0.122	0.124	0.102	0.127	0.095	0.096	0.093	0.116	0.155	0.155	0.118	0.158
29.25	0.078	0.085	0.065	0.075	0.118	0.097	0.096	0.092	0.05	0.082	0.063	0.067	0.079	0.08	0.072	0.082		29.25	0.094	0.085	0.093	0.108	0.122	0.123	0.104	0.124	0.095	0.096	0.095	0.116	0.156	0.154	0.116	0.159
29.5	0.077	0.085	0.065	0.075	0.117	0.096	0.096	0.091	0.048	0.081	0.061	0.066	0.079	0.08	0.072	0.081		29.5	0.094	0.086	0.093	0.109	0.122	0.123	0.103	0.125	0.095	0.096	0.094	0.117	0.156	0.158	0.117	0.16
29.75	0.076	0.083	0.064	0.075	0.116	0.097	0.095	0.092	0.049	0.081	0.061	0.066	0.077	0.08	0.071	0.082		29.75	0.093	0.084	0.092	0.108	0.123	0.124	0.105	0.126	0.095	0.095	0.092	0.118	0.157	0.157	0.117	0.162
30	0.077	0.084	0.065	0.076	0.118	0.097	0.097	0.093	0.049	0.082	0.062	0.068	0.079	0.081	0.073	0.083		30	0.093	0.084	0.091	0.108	0.121	0.124	0.104	0.124	0.093	0.096	0.094	0.119	0.156	0.154	0.118	0.159
30.25	0.079	0.084	0.065	0.076	0.118	0.097	0.097	0.093	0.051	0.082	0.062	0.068	0.08	0.081	0.073	0.083		30.25	0.093	0.085	0.092	0.11	0.125	0.124	0.104	0.128	0.094	0.096	0.096	0.119	0.159	0.16	0.118	0.163
30.5	0.074	0.084	0.064	0.075	0.119	0.097	0.097	0.092	0.047	0.081	0.062	0.066	0.08	0.081	0.073	0.083		30.5	0.09	0.085	0.093	0.107	0.12	0.123	0.103	0.126	0.093	0.095	0.094	0.115	0.158	0.156	0.117	0.16
30.75	0.077	0.084	0.065	0.076	0.117	0.099	0.097	0.093	0.049	0.082	0.063	0.068	0.078	0.081	0.073	0.082		30.75	0.093	0.086	0.092	0.107	0.123	0.124	0.105	0.127	0.094	0.097	0.097	0.118	0.16	0.16	0.122	0.162
31	0.079	0.086	0.066	0.077	0.12	0.098	0.098	0.093	0.053	0.083	0.064	0.068	0.08	0.081	0.073	0.083		31	0.093	0.086	0.094	0.109	0.123	0.125	0.104	0.127	0.095	0.098	0.097	0.12	0.16	0.159	0.124	0.163
31.25	0.08	0.085	0.067	0.077	0.119	0.099	0.099	0.094	0.052	0.084	0.064	0.07	0.08	0.081	0.073	0.084		31.25	0.093	0.085	0.094	0.108	0.124	0.126	0.105	0.127	0.094	0.098	0.098	0.119	0.162	0.162	0.124	0.165
31.5	0.08	0.085	0.067	0.077	0.12	0.099	0.099	0.094	0.053	0.084	0.064	0.069	0.08	0.082	0.074	0.084		31.5	0.095	0.083	0.092	0.108	0.122	0.127	0.104	0.126	0.094	0.098	0.097	0.12	0.161	0.161	0.123	0.167
31.75	0.08	0.086	0.066	0.077	0.121	0.099	0.098	0.095	0.052	0.084	0.063	0.068	0.08	0.082	0.074	0.084		31.75	0.092	0.084	0.092	0.107	0.12	0.127	0.104	0.126	0.095	0.099	0.096	0.121	0.162	0.164	0.127	0.165
32	0.081	0.086	0.067	0.078	0.121	0.1	0.099	0.096	0.054	0.085	0.065	0.071	0.081	0.083	0.074	0.084		32	0.095	0.086	0.094	0.107	0.12	0.126	0.104	0.126	0.098	0.1	0.099	0.121	0.164	0.164	0.124	0.168
32.25	0.078	0.085	0.066	0.077	0.121	0.101	0.1	0.095	0.05	0.083	0.064	0.068	0.081	0.084	0.075	0.085		32.25	0.095	0.085	0.092	0.108	0.122	0.128	0.107	0.128	0.093	0.101	0.099	0.121	0.166	0.166	0.126	0.168
32.5	0.078	0.087	0.068	0.078	0.122	0.101	0.101	0.097	0.051	0.084	0.065	0.071	0.082	0.083	0.076	0.085		32.5	0.096	0.084	0.092	0.108	0.123	0.126	0.105	0.127	0.095	0.101	0.099	0.121	0.165	0.164	0.128	0.168
32.75	0.082	0.087	0.067	0.078	0.12	0.101	0.1	0.096	0.053	0.086	0.064	0.071	0.079	0.083	0.074	0.083		32.75	0.096	0.084	0.091	0.107	0.125	0.126	0.106	0.128	0.099	0.101	0.099	0.12	0.167	0.164	0.129	0.171
33	0.079	0.086	0.067	0.078	0.122	0.101	0.101	0.097	0.052	0.084	0.065	0.07	0.082	0.083	0.076	0.086		33	0.097	0.084	0.093	0.106	0.124	0.127	0.107	0.127	0.096	0.101	0.098	0.12	0.166	0.168	0.128	0.173
33.25	0.079	0.087	0.068	0.079	0.122	0.101	0.102	0.098	0.053	0.086	0.065	0.07	0.082	0.084	0.076	0.085		33.25	0.095	0.084	0.092	0.107	0.122	0.126	0.106	0.126	0.097	0.104	0.099	0.122	0.164	0.167	0.127	0.17
33.5	0.081	0.088	0.07	0.079	0.121	0.102	0.1	0.097	0.053	0.086	0.068	0.072	0.08	0.083	0.075	0.085		33.5	0.097	0.084	0.091	0.108	0.124	0.126	0.103	0.127	0.097	0.104	0.101	0.123	0.166	0.168	0.129	0.17
33.75	0.078	0.087	0.068	0.078	0.124	0.103	0.102	0.098	0.051	0.084	0.065	0.07	0.082	0.085	0.077	0.086		33.75	0.094	0.083	0.092	0.106	0.125	0.127	0.105	0.13	0.098	0.104	0.1	0.124	0.168	0.171	0.129	0.175
34	0.079	0.088	0.07	0.08	0.122	0.103	0.101	0.097	0.052	0.086	0.066	0.07	0.081	0.084	0.076	0.085		34	0.095	0.084	0.093	0.105	0.123	0.126	0.105	0.128	0.099	0.104	0.102	0.123	0.167	0.168	0.128	0.172
34.25	0.083	0.089	0.071	0.079	0.123	0.103	0.102	0.098	0.055	0.088	0.067	0.072	0.082	0.084	0.077	0.086		34.25	0.093	0.084	0.092	0.106	0.122	0.128	0.104	0.128	0.097	0.102	0.1	0.121	0.168	0.171	0.129	0.175
34.5	0.083	0.088	0.07	0.08	0.124	0.103	0.104	0.099	0.055	0.087	0.068	0.072	0.082	0.085	0.077	0.086		34.5	0.096	0.084	0.092	0.106	0.124	0.126	0.107	0.131	0.1	0.103	0.104	0.123	0.17	0.173	0.13	0.175
34.75	0.08	0.089	0.069	0.08	0.125	0.103	0.103	0.1	0.053	0.087	0.067	0.071	0.083	0.085	0.077	0.087		34.75	0.095	0.084	0.091	0.105	0.125	0.128	0.107	0.129	0.098	0.106	0.102	0.122	0.171	0.175	0.132	0.175
35	0.083	0.089	0.071	0.082	0.124	0.104	0.103	0.099	0.056	0.089	0.068	0.073	0.083	0.086	0.078	0.087		35	0.095	0.084	0.091	0.105	0.126	0.13	0.109	0.13	0.101	0.105	0.101	0.12	0.173	0.175	0.134	0.178
35.25	0.079	0.09	0.07	0.08	0.126	0.104	0.105	0.1	0.052	0.086	0.068	0.071	0.085	0.086	0.079	0.088		35.25	0.095	0.082	0.09	0.106	0.126	0.131	0.107	0.13	0.099	0.106	0.102	0.123	0.173	0.176	0.132	0.177
35.5	0.083	0.092	0.072	0.082	0.128	0.105	0.106	0.101	0.056	0.089	0.069	0.074	0.085	0.087	0.08	0.088		35.5	0.098	0.082	0.091	0.104	0.126	0.129	0.109	0.13	0.099	0.105	0.104	0.123	0.174	0.177	0.134	0.182
35.75	0.087	0.091	0.074	0.082	0.128	0.105	0.105	0.102	0.061	0.091	0.071	0.075	0.086	0.087	0.079	0.089		35.75	0.097	0.083	0.092	0.106	0.127	0.129	0.108	0.132	0.103	0.108	0.105	0.124	0.177	0.178	0.136	0.181
36	0.087	0.09	0.075	0.082	0.127	0.106	0.107	0.102	0.061	0.091	0.071	0.075	0.087	0.087	0.081	0.089		36	0.097	0.084	0.091	0.105	0.126	0.13	0.108	0.133	0.1	0.108	0.103	0.125	0.177	0.178	0.137	0.181
36.25	0.086	0.091	0.074	0.083	0.128	0.107	0.107	0.103	0.06	0.091	0.072	0.076	0.087	0.088	0.08	0.09		36.25	0.098	0.084	0.092	0.109	0.129	0.129	0.109	0.138	0.104	0.111	0.106	0.128	0.18	0.179	0.139	0.184
36.5	0.091	0.092	0.077	0.085	0.129	0.109	0.109	0.104	0.067	0.094	0.075	0.078	0.089	0.089	0.081	0.091		36.5	0.101	0.086	0.094	0.11	0.127	0.131	0.11	0.135	0.104	0.111	0.106	0.129	0.182	0.182	0.138	0.184
36.75	0.091	0.092	0.078	0.085	0.129	0.107	0.109	0.104	0.067	0.094	0.075	0.079	0.088	0.089	0.082	0.09		36.75	0.101	0.084	0.095	0.11	0.128	0.13	0.108	0.138	0.106	0.112	0.11	0.129	0.183	0.182	0.138	0.186
37	0.093	0.094	0.079	0.086	0.129	0.108	0.11	0.105	0.068	0.095	0.076	0.079	0.088	0.09	0.082	0.091		37	0.103	0.087	0.096	0.111	0.126	0.13	0.108	0.136	0.107	0.117	0.11	0.133	0.18	0.182	0.137	0.187
37.25	0.096	0.095	0.082	0.087	0.129	0.108	0.108	0.105	0.074	0.098	0.079	0.082	0.087	0.089	0.081	0.092		37.25	0.104	0.087	0.095	0.112	0.127	0.129	0.11	0.135	0.107	0.115	0.112	0.134	0.185	0.185	0.141	0.186
37.5	0.094	0.095	0.081	0.086	0.129	0.109	0.109	0.105	0.07	0.097	0.078	0.081	0.087	0.089	0.082	0.091		37.5	0.108	0.086	0.096	0.112	0.127	0.129	0.109	0.137	0.109	0.116	0.112	0.133	0.189	0.185	0.141	0.189
37.75	0.096	0.095	0.082	0.087	0.13	0.109	0.11	0.106	0.073	0.098	0.08	0.083	0.09	0.091	0.083	0.093		37.75	0.109	0.088	0.097	0.112	0.13	0.131	0.111	0.139	0.11	0.118	0.112	0.135	0.192	0.186	0.142	0.191
38	0.099	0.097	0.084	0.088	0.131	0.11	0.111	0.105	0.076	0.099	0.082	0.084	0.091	0.091	0.083	0.092		38	0.111	0.087	0.098	0.114	0.127	0.131	0.109	0.136	0.112	0.121	0.115	0.135	0.191	0.185	0.143	0.189
38.25	0.099	0.097	0.084	0.088	0.132	0.11	0.111	0.106	0.076	0.1	0.082	0.086	0.09	0.092	0.084	0.093		38.25	0.109	0.086	0.099	0.116	0.127	0.132	0.109	0.134	0.111	0.119	0.116	0.137	0.191	0.185	0.141	0.188
38.5	0.099	0.096	0.085	0.091	0.134	0.111	0.112	0.107	0.077	0.101	0.082	0.085	0.091	0.092	0.085	0.093		38.5	0.111	0.089	0.1	0.114	0.128	0.13	0.109	0.136	0.114	0.121	0.117	0.139	0.195	0.187	0.145	0.189
38.75	0.103	0.098	0.086	0.091	0.132	0.11	0.112	0.107	0.081	0.102	0.084	0.087	0.09	0.09	0.084	0.092		38.75	0.111	0.09	0.101	0.117	0.129	0.133	0.11	0.135	0.114	0.123	0.119	0.143	0.194	0.187	0.142	0.194
39	0.101	0.099	0.088	0.092	0.133	0.11	0.113	0.108	0.081	0.103	0.085	0.088	0.09	0.091	0.085	0.093		39	0.112	0.089	0.102	0.117	0.13	0.131	0.11	0.137	0.115	0.125	0.118	0.143	0.197	0.191	0.145	0.194
39.25	0.105	0.101	0.088	0.092	0.132	0.111	0.112	0.108	0.083	0.104	0.086	0.09	0.09	0.091	0.084	0.093		39.25	0.112	0.093	0.101	0.117	0.127	0.13	0.108	0.135	0.113	0.123	0.121	0.142	0.195	0.19	0.145	0.192
39.5	0.107	0.1	0.09	0.092	0.134	0.112	0.112	0.108	0.085	0.105	0.087	0.09	0.09	0.091	0.084	0.093		39.5	0.113	0.089	0.102	0.117	0.126	0.13	0.107	0.134	0.118	0.127	0.12	0.143	0.197	0.191	0.148	0.191
39.75	0.108	0.1	0.091	0.093	0.129	0.111	0.11	0.108	0.086	0.106	0.088	0.091	0.086	0.09	0.082	0.091		39.75	0.113	0.092	0.104	0.118	0.125	0.13	0.109	0.133	0.117	0.128	0.123	0.147	0.197	0.189	0.147	0.191
40	0.107	0.101	0.091	0.094	0.13	0.111	0.111	0.107	0.086	0.106	0.09	0.091	0.088	0.09	0.083	0.091		40	0.116	0.093	0.104	0.118	0.123	0.129	0.108	0.134	0.12	0.129	0.124	0.148	0.198	0.189	0.145	0.191
40.25	0.11	0.102	0.092	0.094	0.132	0.112	0.112	0.108	0.088	0.107	0.09	0.093	0.088	0.091	0.083	0.092		40.25	0.116	0.092	0.107	0.12	0.125	0.131	0.107	0.131	0.119	0.128	0.123	0.146	0.197	0.188	0.145	0.19
40.5	0.11	0.103	0.093	0.094	0.132	0.112	0.112	0.109	0.089	0.107	0.091	0.093	0.088	0.092	0.084	0.093		40.5	0.118	0.095	0.106	0.12	0.126	0.13	0.106	0.133	0.121	0.131	0.123	0.148	0.199	0.192	0.147	0.194
40.75	0.108	0.102	0.092	0.094	0.132	0.113	0.113	0.109	0.088	0.108	0.09	0.092	0.088	0.092	0.084	0.093		40.75	0.117	0.091	0.107	0.121	0.125	0.129	0.107	0.137	0.119	0.129	0.128	0.146	0.206	0.193	0.149	0.196
41	0.112	0.103	0.094	0.096	0.132	0.113	0.114	0.11	0.091	0.109	0.092	0.095	0.089	0.093	0.085	0.093		41	0.117	0.092	0.105	0.12	0.125	0.131	0.107	0.133	0.12	0.13	0.124	0.148	0.208	0.193	0.149	0.197
41.25	0.111	0.102	0.095	0.095	0.136	0.115	0.115	0.11	0.092	0.109	0.092	0.094	0.091	0.093	0.087	0.094		41.25	0.121	0.096	0.106	0.122	0.128	0.132	0.108	0.137	0.119	0.131	0.128	0.154	0.213	0.195	0.153	0.202
41.5	0.111	0.103	0.094	0.096	0.134	0.115	0.114	0.11	0.09	0.109	0.092	0.094	0.09	0.093	0.085	0.094		41.5	0.12	0.093	0.106	0.12	0.126	0.133	0.108	0.136	0.12	0.13	0.127	0.152	0.213	0.196	0.154	0.197
41.75	0.112	0.104	0.095	0.095	0.136	0.115	0.116	0.112	0.093	0.11	0.093	0.096	0.091	0.094	0.087	0.095		41.75	0.121	0.095	0.106	0.121	0.128	0.133	0.111	0.138	0.121	0.131	0.126	0.15	0.214	0.2	0.157	0.201
42	0.113	0.104	0.095	0.097	0.135	0.116	0.116	0.113	0.092	0.111	0.094	0.096	0.091	0.094	0.087	0.094		42	0.12	0.096	0.105	0.122	0.129	0.134	0.111	0.138	0.12	0.13	0.128	0.15	0.214	0.204	0.158	0.204
42.25	0.112	0.104	0.096	0.096	0.137	0.116	0.117	0.112	0.092	0.11	0.093	0.095	0.095	0.095	0.088	0.097		42.25	0.12	0.094	0.104	0.122	0.13	0.135	0.113	0.139	0.122	0.131	0.128	0.15	0.215	0.203	0.161	0.203
42.5	0.112	0.104	0.096	0.097	0.139	0.117	0.119	0.113	0.093	0.111	0.093	0.096	0.094	0.096	0.088	0.097		42.5	0.119	0.093	0.108	0.119	0.13	0.132	0.11	0.137	0.123	0.134	0.128	0.152	0.219	0.201	0.16	0.202
42.75	0.113	0.105	0.096	0.096	0.139	0.117	0.118	0.113	0.092	0.111	0.094	0.095	0.094	0.096	0.088	0.096		42.75	0.121	0.094	0.109	0.123	0.133	0.134	0.112	0.14	0.124	0.134	0.13	0.153	0.216	0.203	0.165	0.205
43	0.113	0.106	0.096	0.097	0.138	0.118	0.119	0.114	0.093	0.111	0.094	0.097	0.095	0.096	0.089	0.096		43	0.123	0.093	0.107	0.119	0.133	0.134	0.112	0.139	0.123	0.135	0.128	0.153	0.218	0.204	0.169	0.205
43.25	0.117	0.106	0.099	0.099	0.141	0.118	0.119	0.115	0.096	0.113	0.096	0.098	0.096	0.096	0.091	0.099		43.25	0.123	0.095	0.108	0.122	0.133	0.132	0.11	0.141	0.122	0.136	0.129	0.153	0.221	0.206	0.168	0.208
43.5	0.114	0.106	0.098	0.099	0.141	0.119	0.122	0.116	0.096	0.113	0.096	0.098	0.097	0.097	0.091	0.099		43.5	0.12	0.095	0.108	0.121	0.132	0.132	0.109	0.14	0.125	0.135	0.132	0.155	0.223	0.206	0.17	0.207
43.75	0.118	0.108	0.1	0.1	0.14	0.119	0.121	0.116	0.097	0.115	0.097	0.099	0.094	0.097	0.089	0.098		43.75	0.121	0.092	0.108	0.123	0.132	0.134	0.113	0.14	0.128	0.136	0.132	0.154	0.223	0.21	0.169	0.21
44	0.117	0.106	0.099	0.099	0.141	0.119	0.122	0.116	0.099	0.115	0.098	0.099	0.096	0.097	0.09	0.098		44	0.119	0.096	0.109	0.122	0.134	0.134	0.111	0.141	0.125	0.137	0.129	0.158	0.224	0.211	0.17	0.21
44.25	0.117	0.108	0.099	0.1	0.142	0.12	0.123	0.117	0.097	0.114	0.098	0.1	0.098	0.098	0.091	0.098		44.25	0.12	0.092	0.107	0.121	0.13	0.132	0.111	0.139	0.125	0.137	0.13	0.155	0.222	0.208	0.169	0.208
44.5	0.119	0.108	0.101	0.1	0.141	0.12	0.122	0.116	0.099	0.115	0.098	0.101	0.096	0.096	0.091	0.098		44.5	0.12	0.094	0.107	0.121	0.133	0.134	0.113	0.14	0.125	0.136	0.131	0.157	0.227	0.212	0.173	0.21
44.75	0.119	0.108	0.101	0.1	0.141	0.121	0.121	0.117	0.099	0.116	0.099	0.101	0.094	0.098	0.09	0.098		44.75	0.121	0.094	0.107	0.122	0.13	0.134	0.111	0.14	0.124	0.138	0.131	0.156	0.227	0.208	0.171	0.212
45	0.12	0.109	0.101	0.101	0.14	0.121	0.121	0.117	0.099	0.116	0.098	0.102	0.093	0.097	0.089	0.098		45	0.119	0.093	0.106	0.119	0.128	0.13	0.108	0.137	0.127	0.137	0.132	0.157	0.226	0.211	0.171	0.211
45.25	0.118	0.109	0.102	0.101	0.139	0.12	0.12	0.116	0.1	0.116	0.1	0.101	0.093	0.096	0.089	0.096		45.25	0.12	0.094	0.107	0.119	0.126	0.131	0.107	0.136	0.127	0.139	0.132	0.157	0.226	0.21	0.171	0.208
45.5	0.119	0.11	0.102	0.102	0.137	0.12	0.118	0.117	0.1	0.117	0.1	0.102	0.091	0.095	0.088	0.095		45.5	0.122	0.094	0.107	0.121	0.124	0.131	0.105	0.135	0.128	0.14	0.133	0.157	0.224	0.209	0.171	0.21
45.75	0.118	0.111	0.102	0.102	0.135	0.12	0.118	0.117	0.099	0.117	0.101	0.103	0.087	0.094	0.087	0.095		45.75	0.122	0.094	0.105	0.12	0.123	0.129	0.104	0.133	0.127	0.139	0.133	0.156	0.227	0.211	0.171	0.208
46	0.121	0.111	0.103	0.103	0.136	0.121	0.118	0.117	0.101	0.117	0.101	0.103	0.089	0.096	0.088	0.095		46	0.123	0.093	0.108	0.123	0.121	0.129	0.103	0.132	0.126	0.139	0.134	0.156	0.226	0.211	0.172	0.211
46.25	0.12	0.11	0.102	0.103	0.137	0.121	0.119	0.117	0.1	0.118	0.102	0.103	0.089	0.096	0.088	0.096		46.25	0.122	0.095	0.105	0.12	0.123	0.129	0.104	0.131	0.126	0.136	0.131	0.162	0.228	0.211	0.173	0.213
46.5	0.122	0.113	0.103	0.104	0.135	0.121	0.119	0.118	0.104	0.118	0.102	0.104	0.087	0.095	0.088	0.095		46.5	0.122	0.097	0.109	0.119	0.121	0.128	0.104	0.135	0.126	0.139	0.133	0.161	0.228	0.214	0.174	0.211
46.75	0.123	0.113	0.105	0.105	0.137	0.121	0.119	0.117	0.104	0.12	0.103	0.105	0.087	0.095	0.087	0.095		46.75	0.121	0.096	0.107	0.12	0.12	0.128	0.104	0.135	0.128	0.138	0.131	0.156	0.23	0.212	0.174	0.209
47	0.121	0.111	0.104	0.104	0.137	0.123	0.119	0.118	0.102	0.119	0.103	0.104	0.088	0.095	0.088	0.096		47	0.123	0.093	0.106	0.122	0.122	0.13	0.102	0.134	0.126	0.139	0.133	0.159	0.23	0.211	0.174	0.211
47.25	0.124	0.113	0.105	0.105	0.137	0.122	0.119	0.119	0.105	0.121	0.105	0.106	0.088	0.095	0.088	0.094		47.25	0.12	0.095	0.107	0.121	0.121	0.133	0.102	0.133	0.128	0.14	0.134	0.159	0.234	0.213	0.173	0.211
47.5	0.125	0.113	0.106	0.104	0.136	0.122	0.118	0.118	0.106	0.121	0.105	0.106	0.086	0.095	0.087	0.095		47.5	0.121	0.096	0.107	0.119	0.12	0.13	0.1	0.132	0.127	0.14	0.132	0.158	0.234	0.213	0.174	0.211
47.75	0.123	0.114	0.106	0.106	0.136	0.124	0.12	0.12	0.104	0.121	0.104	0.106	0.087	0.097	0.089	0.095		47.75	0.12	0.094	0.107	0.121	0.12	0.131	0.101	0.133	0.131	0.139	0.136	0.157	0.234	0.216	0.176	0.212
48	0.124	0.113	0.106	0.105	0.135	0.123	0.119	0.12	0.106	0.121	0.105	0.106	0.085	0.096	0.088	0.095		48	0.124	0.097	0.108	0.121	0.119	0.13	0.101	0.133	0.131	0.139	0.139	0.158	0.233	0.218	0.176	0.214
48.25	0.124	0.113	0.107	0.107	0.134	0.124	0.118	0.12	0.105	0.121	0.106	0.107	0.084	0.094	0.088	0.094		48.25	0.12	0.094	0.106	0.12	0.119	0.13	0.1	0.131	0.13	0.14	0.137	0.159	0.238	0.218	0.175	0.214
48.5	0.124	0.114	0.106	0.106	0.137	0.124	0.12	0.121	0.104	0.12	0.105	0.106	0.086	0.096	0.088	0.096		48.5	0.123	0.094	0.105	0.121	0.118	0.131	0.101	0.131	0.129	0.141	0.136	0.158	0.239	0.219	0.181	0.216
48.75	0.124	0.115	0.109	0.106	0.138	0.124	0.122	0.121	0.106	0.122	0.106	0.107	0.09	0.097	0.09	0.097		48.75	0.121	0.095	0.106	0.122	0.119	0.128	0.099	0.132	0.132	0.141	0.139	0.16	0.239	0.221	0.181	0.22
49	0.126	0.116	0.107	0.106	0.142	0.125	0.122	0.122	0.107	0.123	0.107	0.107	0.091	0.098	0.09	0.099		49	0.121	0.094	0.105	0.12	0.12	0.128	0.101	0.132	0.129	0.139	0.136	0.159	0.241	0.222	0.18	0.22
49.25	0.126	0.115	0.108	0.106	0.14	0.126	0.124	0.123	0.107	0.124	0.107	0.107	0.091	0.099	0.091	0.098		49.25	0.123	0.095	0.107	0.123	0.121	0.13	0.102	0.132	0.13	0.143	0.137	0.16	0.243	0.226	0.181	0.22
49.5	0.124	0.115	0.108	0.107	0.144	0.128	0.127	0.123	0.105	0.123	0.106	0.107	0.096	0.1	0.094	0.1		49.5	0.123	0.094	0.106	0.121	0.122	0.131	0.102	0.136	0.13	0.141	0.138	0.158	0.247	0.23	0.185	0.224
49.75	0.127	0.115	0.108	0.109	0.145	0.129	0.127	0.124	0.108	0.124	0.107	0.109	0.096	0.102	0.095	0.101		49.75	0.122	0.095	0.105	0.119	0.124	0.131	0.103	0.137	0.13	0.141	0.138	0.159	0.245	0.231	0.186	0.225
50	0.126	0.116	0.108	0.107	0.145	0.13	0.128	0.126	0.107	0.123	0.108	0.108	0.098	0.102	0.096	0.103		50	0.121	0.095	0.105	0.12	0.125	0.132	0.105	0.137	0.13	0.143	0.136	0.161	0.251	0.231	0.189	0.227
50.25	0.127	0.116	0.109	0.108	0.15	0.129	0.13	0.127	0.108	0.125	0.108	0.109	0.101	0.103	0.097	0.103		50.25	0.123	0.095	0.106	0.121	0.126	0.132	0.104	0.137	0.131	0.141	0.139	0.159	0.25	0.234	0.192	0.232
50.5	0.127	0.117	0.109	0.108	0.149	0.13	0.13	0.122	0.109	0.127	0.108	0.109	0.101	0.105	0.097	0.102		50.5	0.122	0.094	0.104	0.119	0.13	0.134	0.106	0.137	0.128	0.141	0.137	0.16	0.251	0.237	0.193	0.232
50.75	0.126	0.116	0.108	0.108	0.149	0.131	0.13	0.122	0.107	0.125	0.108	0.108	0.102	0.104	0.098	0.102		50.75	0.125	0.096	0.107	0.121	0.129	0.133	0.108	0.141	0.131	0.143	0.14	0.164	0.254	0.239	0.194	0.232
51	0.128	0.117	0.11	0.109	0.151	0.132	0.132	0.123	0.11	0.125	0.109	0.109	0.103	0.107	0.098	0.104		51	0.123	0.095	0.105	0.121	0.131	0.132	0.109	0.139	0.13	0.144	0.141	0.163	0.256	0.24	0.197	0.231
51.25	0.128	0.116	0.11	0.108	0.151	0.131	0.133	0.124	0.107	0.125	0.109	0.109	0.103	0.107	0.099	0.104		51.25	0.119	0.094	0.108	0.118	0.127	0.132	0.107	0.137	0.129	0.141	0.138	0.161	0.259	0.241	0.196	0.233
51.5	0.128	0.118	0.109	0.11	0.154	0.133	0.136	0.124	0.106	0.125	0.108	0.109	0.106	0.107	0.101	0.105		51.5	0.12	0.091	0.106	0.118	0.129	0.133	0.108	0.142	0.132	0.14	0.136	0.163	0.261	0.244	0.2	0.233
51.75	0.127	0.119	0.109	0.109	0.154	0.133	0.134	0.125	0.108	0.125	0.109	0.11	0.106	0.107	0.1	0.105		51.75	0.115	0.09	0.101	0.115	0.129	0.134	0.11	0.141	0.13	0.137	0.134	0.16	0.262	0.246	0.201	0.235
52	0.127	0.117	0.108	0.11	0.155	0.134	0.136	0.126	0.105	0.124	0.109	0.109	0.108	0.109	0.101	0.106		52	0.116	0.092	0.102	0.115	0.13	0.133	0.109	0.139	0.127	0.137	0.135	0.159	0.263	0.248	0.202	0.239
52.25	0.123	0.115	0.106	0.109	0.157	0.135	0.137	0.127	0.101	0.122	0.105	0.106	0.109	0.111	0.102	0.107		52.25	0.112	0.089	0.099	0.113	0.133	0.134	0.111	0.141	0.125	0.133	0.13	0.155	0.265	0.25	0.205	0.239
52.5	0.122	0.116	0.105	0.108	0.157	0.135	0.137	0.127	0.098	0.122	0.104	0.104	0.109	0.11	0.102	0.108		52.5	0.11	0.088	0.098	0.11	0.133	0.134	0.109	0.14	0.126	0.132	0.131	0.153	0.268	0.25	0.204	0.24
52.75	0.121	0.115	0.105	0.108	0.156	0.135	0.137	0.127	0.097	0.121	0.105	0.104	0.107	0.109	0.102	0.107		52.75	0.11	0.088	0.096	0.109	0.131	0.136	0.11	0.14	0.123	0.132	0.129	0.156	0.267	0.252	0.205	0.238
53	0.123	0.116	0.107	0.108	0.158	0.135	0.139	0.128	0.102	0.122	0.106	0.107	0.11	0.112	0.103	0.109		53	0.108	0.087	0.098	0.11	0.131	0.133	0.111	0.138	0.121	0.13	0.131	0.152	0.269	0.254	0.205	0.239
53.25	0.124	0.118	0.107	0.109	0.16	0.136	0.14	0.129	0.102	0.124	0.108	0.107	0.112	0.112	0.106	0.109		53.25	0.109	0.085	0.099	0.11	0.132	0.134	0.111	0.141	0.127	0.132	0.134	0.154	0.271	0.257	0.207	0.243
53.5	0.125	0.118	0.106	0.11	0.16	0.138	0.14	0.131	0.104	0.125	0.108	0.108	0.113	0.112	0.106	0.109		53.5	0.113	0.091	0.102	0.114	0.133	0.135	0.112	0.141	0.128	0.138	0.135	0.16	0.274	0.257	0.209	0.243
53.75	0.129	0.119	0.11	0.11	0.161	0.138	0.141	0.13	0.106	0.125	0.11	0.109	0.114	0.112	0.107	0.111		53.75	0.116	0.09	0.102	0.114	0.133	0.134	0.111	0.14	0.127	0.138	0.138	0.158	0.275	0.259	0.211	0.244
54	0.129	0.12	0.11	0.112	0.159	0.139	0.14	0.131	0.108	0.128	0.111	0.112	0.111	0.113	0.106	0.111		54	0.116	0.091	0.101	0.115	0.133	0.136	0.111	0.142	0.128	0.141	0.139	0.161	0.278	0.261	0.213	0.244
54.25	0.128	0.119	0.111	0.112	0.161	0.139	0.143	0.13	0.109	0.127	0.111	0.11	0.114	0.113	0.107	0.11		54.25	0.113	0.089	0.101	0.115	0.135	0.135	0.111	0.14	0.129	0.137	0.135	0.16	0.277	0.262	0.214	0.242
54.5	0.13	0.12	0.113	0.113	0.163	0.141	0.144	0.133	0.111	0.128	0.113	0.112	0.116	0.116	0.109	0.113		54.5	0.115	0.091	0.1	0.115	0.136	0.139	0.113	0.142	0.128	0.14	0.138	0.161	0.281	0.264	0.217	0.248
54.75	0.133	0.121	0.113	0.114	0.164	0.141	0.144	0.132	0.113	0.131	0.113	0.114	0.116	0.115	0.11	0.113		54.75	0.117	0.091	0.101	0.114	0.135	0.136	0.112	0.142	0.129	0.142	0.139	0.16	0.281	0.266	0.22	0.248
55	0.134	0.124	0.116	0.115	0.162	0.141	0.143	0.133	0.114	0.131	0.114	0.114	0.115	0.115	0.109	0.112		55	0.118	0.091	0.101	0.117	0.135	0.138	0.111	0.142	0.133	0.143	0.139	0.162	0.28	0.265	0.219	0.245
55.25	0.136	0.123	0.118	0.116	0.161	0.14	0.142	0.133	0.117	0.132	0.117	0.117	0.115	0.114	0.108	0.111		55.25	0.118	0.09	0.106	0.116	0.138	0.137	0.114	0.142	0.134	0.14	0.14	0.164	0.285	0.271	0.22	0.249
55.5	0.135	0.123	0.117	0.116	0.162	0.141	0.144	0.133	0.115	0.132	0.116	0.117	0.115	0.115	0.109	0.113		55.5	0.118	0.091	0.104	0.117	0.136	0.136	0.113	0.141	0.131	0.141	0.139	0.163	0.285	0.269	0.22	0.246
55.75	0.134	0.124	0.116	0.116	0.162	0.142	0.144	0.133	0.116	0.132	0.117	0.116	0.114	0.116	0.109	0.113		55.75	0.119	0.093	0.106	0.116	0.136	0.137	0.112	0.139	0.133	0.143	0.14	0.164	0.289	0.269	0.219	0.245
56	0.139	0.124	0.118	0.117	0.16	0.14	0.142	0.133	0.119	0.134	0.118	0.117	0.111	0.112	0.106	0.11		56	0.118	0.091	0.103	0.117	0.132	0.135	0.108	0.137	0.132	0.142	0.139	0.167	0.286	0.268	0.221	0.246
56.25	0.137	0.124	0.117	0.117	0.157	0.141	0.141	0.132	0.118	0.135	0.12	0.118	0.108	0.112	0.105	0.11		56.25	0.12	0.092	0.106	0.119	0.128	0.133	0.107	0.136	0.133	0.144	0.141	0.167	0.285	0.267	0.22	0.242
56.5	0.138	0.125	0.12	0.117	0.158	0.142	0.143	0.133	0.119	0.135	0.119	0.119	0.108	0.112	0.106	0.11		56.5	0.12	0.091	0.106	0.119	0.126	0.131	0.105	0.135	0.134	0.143	0.14	0.166	0.284	0.267	0.219	0.244
56.75	0.139	0.124	0.119	0.117	0.156	0.141	0.14	0.133	0.12	0.135	0.12	0.118	0.106	0.111	0.105	0.108		56.75	0.119	0.091	0.106	0.119	0.124	0.133	0.104	0.133	0.134	0.144	0.142	0.167	0.287	0.267	0.221	0.244
57	0.141	0.127	0.12	0.118	0.157	0.141	0.141	0.133	0.121	0.136	0.122	0.121	0.105	0.112	0.106	0.108		57	0.124	0.094	0.105	0.117	0.122	0.132	0.102	0.13	0.133	0.145	0.143	0.167	0.286	0.268	0.216	0.244
57.25	0.14	0.126	0.121	0.118	0.156	0.141	0.141	0.134	0.12	0.137	0.121	0.119	0.105	0.112	0.105	0.108		57.25	0.121	0.092	0.105	0.119	0.122	0.132	0.102	0.133	0.135	0.145	0.144	0.166	0.285	0.266	0.219	0.24
57.5	0.143	0.128	0.122	0.12	0.158	0.141	0.141	0.134	0.123	0.137	0.123	0.122	0.106	0.112	0.107	0.109		57.5	0.121	0.093	0.105	0.118	0.125	0.133	0.103	0.136	0.134	0.145	0.142	0.168	0.289	0.271	0.221	0.246
57.75	0.143	0.128	0.122	0.121	0.161	0.142	0.144	0.136	0.123	0.138	0.124	0.121	0.11	0.115	0.108	0.11		57.75	0.121	0.093	0.107	0.117	0.126	0.134	0.104	0.137	0.135	0.146	0.143	0.167	0.291	0.271	0.223	0.245
58	0.142	0.128	0.121	0.121	0.161	0.144	0.145	0.137	0.122	0.137	0.123	0.12	0.113	0.116	0.109	0.112		58	0.121	0.092	0.105	0.117	0.127	0.137	0.107	0.137	0.133	0.145	0.142	0.17	0.292	0.276	0.226	0.245
58.25	0.143	0.128	0.122	0.121	0.163	0.145	0.146	0.138	0.123	0.138	0.124	0.122	0.113	0.116	0.11	0.113		58.25	0.121	0.092	0.107	0.119	0.132	0.137	0.109	0.136	0.136	0.146	0.142	0.166	0.295	0.28	0.228	0.249
58.5	0.142	0.129	0.122	0.121	0.162	0.146	0.147	0.139	0.123	0.139	0.124	0.123	0.112	0.116	0.11	0.113		58.5	0.12	0.091	0.104	0.118	0.129	0.138	0.107	0.138	0.135	0.143	0.143	0.168	0.296	0.278	0.227	0.252
58.75	0.137	0.127	0.12	0.12	0.163	0.146	0.147	0.138	0.117	0.137	0.121	0.119	0.114	0.116	0.111	0.112		58.75	0.117	0.093	0.104	0.118	0.135	0.139	0.111	0.141	0.133	0.144	0.141	0.165	0.304	0.284	0.232	0.254
59	0.137	0.127	0.118	0.12	0.167	0.147	0.149	0.14	0.115	0.135	0.121	0.119	0.116	0.119	0.111	0.115		59	0.113	0.087	0.1	0.111	0.133	0.138	0.108	0.144	0.128	0.139	0.139	0.162	0.301	0.283	0.234	0.256
59.25	0.136	0.127	0.118	0.119	0.166	0.147	0.15	0.14	0.113	0.135	0.119	0.118	0.117	0.118	0.112	0.116		59.25	0.11	0.088	0.098	0.111	0.135	0.138	0.108	0.147	0.127	0.135	0.136	0.158	0.304	0.286	0.236	0.257
59.5	0.133	0.126	0.116	0.119	0.17	0.149	0.152	0.14	0.11	0.134	0.118	0.117	0.12	0.12	0.114	0.118		59.5	0.107	0.086	0.095	0.108	0.136	0.138	0.109	0.145	0.127	0.134	0.135	0.16	0.303	0.286	0.239	0.256
59.75	0.134	0.126	0.117	0.12	0.17	0.149	0.153	0.143	0.111	0.135	0.118	0.117	0.122	0.121	0.116	0.118		59.75	0.109	0.087	0.097	0.11	0.137	0.14	0.109	0.146	0.125	0.135	0.134	0.159	0.307	0.29	0.237	0.259
60	0.133	0.127	0.117	0.12	0.169	0.15	0.153	0.143	0.113	0.136	0.121	0.117	0.119	0.121	0.116	0.118		60	0.105	0.085	0.095	0.107	0.135	0.138	0.11	0.145	0.127	0.133	0.134	0.159	0.308	0.29	0.24	0.26
60.25	0.136	0.128	0.117	0.121	0.17	0.15	0.153	0.143	0.112	0.135	0.121	0.118	0.121	0.121	0.115	0.118		60.25	0.109	0.088	0.096	0.108	0.136	0.14	0.109	0.145	0.127	0.134	0.136	0.16	0.309	0.289	0.241	0.261
60.5	0.138	0.129	0.121	0.122	0.171	0.15	0.154	0.143	0.118	0.138	0.122	0.121	0.122	0.122	0.116	0.119		60.5	0.111	0.087	0.099	0.111	0.136	0.138	0.111	0.147	0.129	0.138	0.138	0.16	0.311	0.292	0.242	0.265
60.75	0.139	0.13	0.121	0.122	0.172	0.152	0.155	0.144	0.117	0.138	0.123	0.121	0.123	0.123	0.118	0.12		60.75	0.112	0.088	0.1	0.112	0.139	0.141	0.111	0.147	0.13	0.138	0.141	0.162	0.315	0.296	0.245	0.263
61	0.141	0.13	0.122	0.123	0.172	0.152	0.154	0.145	0.12	0.14	0.125	0.122	0.123	0.123	0.117	0.12		61	0.116	0.087	0.103	0.113	0.138	0.138	0.11	0.146	0.132	0.142	0.141	0.164	0.314	0.296	0.243	0.268
61.25	0.143	0.131	0.125	0.125	0.173	0.152	0.156	0.146	0.123	0.141	0.126	0.125	0.124	0.124	0.118	0.121		61.25	0.114	0.091	0.101	0.115	0.136	0.144	0.111	0.147	0.133	0.139	0.139	0.166	0.314	0.294	0.243	0.267
61.5	0.143	0.133	0.126	0.125	0.175	0.155	0.158	0.146	0.124	0.141	0.128	0.125	0.124	0.125	0.119	0.12		61.5	0.114	0.089	0.101	0.112	0.137	0.138	0.111	0.144	0.131	0.14	0.139	0.167	0.317	0.298	0.245	0.27
61.75	0.147	0.133	0.127	0.126	0.173	0.153	0.158	0.147	0.126	0.143	0.129	0.128	0.123	0.124	0.119	0.12		61.75	0.114	0.089	0.103	0.115	0.133	0.139	0.11	0.144	0.134	0.143	0.143	0.167	0.316	0.295	0.244	0.269
62	0.145	0.133	0.127	0.127	0.168	0.152	0.155	0.145	0.125	0.143	0.129	0.127	0.118	0.123	0.116	0.118		62	0.114	0.089	0.102	0.114	0.132	0.14	0.108	0.141	0.132	0.141	0.141	0.167	0.314	0.295	0.244	0.269
62.25	0.145	0.133	0.127	0.127	0.168	0.153	0.155	0.146	0.126	0.143	0.128	0.127	0.117	0.122	0.116	0.119		62.25	0.121	0.091	0.104	0.116	0.13	0.137	0.107	0.14	0.135	0.144	0.142	0.17	0.315	0.293	0.246	0.265
62.5	0.144	0.134	0.127	0.126	0.169	0.153	0.156	0.146	0.124	0.144	0.129	0.127	0.118	0.122	0.115	0.117		62.5	0.115	0.09	0.1	0.116	0.127	0.138	0.103	0.141	0.134	0.139	0.144	0.166	0.316	0.292	0.246	0.267
62.75	0.15	0.135	0.13	0.127	0.167	0.154	0.154	0.145	0.13	0.145	0.131	0.129	0.114	0.12	0.114	0.117		62.75	0.118	0.09	0.103	0.114	0.127	0.134	0.104	0.139	0.135	0.144	0.148	0.17	0.315	0.292	0.244	0.265
63	0.15	0.136	0.13	0.128	0.169	0.155	0.156	0.147	0.13	0.147	0.133	0.129	0.117	0.122	0.116	0.117		63	0.116	0.092	0.102	0.113	0.127	0.137	0.106	0.14	0.13	0.142	0.145	0.168	0.317	0.294	0.245	0.267
63.25	0.149	0.137	0.129	0.128	0.172	0.154	0.158	0.148	0.129	0.147	0.134	0.13	0.12	0.125	0.117	0.121		63.25	0.117	0.091	0.106	0.114	0.131	0.137	0.105	0.143	0.136	0.142	0.146	0.17	0.32	0.298	0.249	0.271
63.5	0.152	0.138	0.134	0.13	0.173	0.156	0.16	0.149	0.133	0.149	0.134	0.132	0.121	0.124	0.119	0.12		63.5	0.117	0.09	0.105	0.117	0.134	0.138	0.107	0.142	0.133	0.146	0.147	0.17	0.321	0.302	0.248	0.273
63.75	0.15	0.138	0.132	0.129	0.175	0.157	0.16	0.15	0.131	0.148	0.134	0.13	0.122	0.126	0.118	0.12		63.75	0.118	0.092	0.105	0.117	0.132	0.136	0.104	0.141	0.136	0.145	0.148	0.171	0.322	0.298	0.25	0.268
64	0.153	0.138	0.132	0.131	0.174	0.157	0.16	0.151	0.133	0.149	0.136	0.132	0.121	0.125	0.118	0.12		64	0.117	0.092	0.105	0.115	0.135	0.139	0.107	0.143	0.133	0.145	0.145	0.173	0.325	0.303	0.253	0.274
64.25	0.151	0.137	0.133	0.131	0.176	0.158	0.16	0.152	0.132	0.149	0.135	0.132	0.124	0.127	0.121	0.122		64.25	0.119	0.092	0.105	0.116	0.137	0.139	0.109	0.143	0.136	0.144	0.148	0.173	0.328	0.305	0.253	0.277
64.5	0.154	0.138	0.134	0.131	0.179	0.159	0.163	0.153	0.135	0.15	0.136	0.133	0.127	0.128	0.122	0.124		64.5	0.12	0.091	0.104	0.117	0.137	0.141	0.108	0.145	0.137	0.146	0.149	0.174	0.329	0.309	0.257	0.28
64.75	0.153	0.14	0.134	0.131	0.179	0.16	0.164	0.153	0.134	0.149	0.137	0.134	0.129	0.129	0.123	0.125		64.75	0.119	0.091	0.105	0.116	0.136	0.14	0.11	0.146	0.135	0.144	0.147	0.175	0.331	0.309	0.26	0.28
65	0.153	0.14	0.135	0.132	0.179	0.161	0.166	0.155	0.135	0.151	0.137	0.134	0.129	0.128	0.123	0.127		65	0.118	0.091	0.103	0.115	0.138	0.14	0.11	0.145	0.135	0.143	0.146	0.172	0.332	0.312	0.261	0.283
65.25	0.154	0.14	0.136	0.132	0.18	0.161	0.166	0.156	0.135	0.15	0.137	0.133	0.129	0.131	0.124	0.125		65.25	0.113	0.088	0.104	0.114	0.138	0.14	0.11	0.145	0.134	0.142	0.145	0.171	0.335	0.312	0.261	0.282
65.5	0.154	0.14	0.135	0.135	0.181	0.162	0.167	0.156	0.134	0.151	0.137	0.134	0.129	0.131	0.125	0.126		65.5	0.115	0.091	0.103	0.116	0.139	0.142	0.111	0.148	0.133	0.143	0.145	0.174	0.337	0.313	0.262	0.285
65.75	0.154	0.14	0.135	0.133	0.181	0.163	0.165	0.155	0.134	0.152	0.138	0.133	0.129	0.131	0.125	0.126		65.75	0.117	0.09	0.101	0.115	0.139	0.139	0.111	0.146	0.134	0.144	0.146	0.171	0.338	0.313	0.262	0.285
66	0.154	0.14	0.135	0.134	0.182	0.164	0.167	0.156	0.134	0.152	0.136	0.134	0.13	0.131	0.125	0.127		66	0.115	0.091	0.103	0.114	0.141	0.14	0.114	0.147	0.134	0.142	0.146	0.17	0.34	0.319	0.264	0.285
66.25	0.154	0.14	0.136	0.135	0.182	0.164	0.167	0.158	0.135	0.154	0.138	0.134	0.13	0.13	0.125	0.127		66.25	0.114	0.093	0.103	0.115	0.142	0.142	0.113	0.146	0.133	0.143	0.147	0.172	0.342	0.317	0.266	0.288
66.5	0.154	0.141	0.136	0.134	0.183	0.164	0.169	0.159	0.134	0.154	0.139	0.133	0.131	0.134	0.126	0.129		66.5	0.114	0.089	0.102	0.114	0.143	0.14	0.113	0.147	0.134	0.141	0.145	0.169	0.342	0.32	0.268	0.29
66.75	0.154	0.142	0.136	0.135	0.184	0.165	0.169	0.158	0.134	0.154	0.139	0.135	0.131	0.132	0.126	0.127		66.75	0.114	0.089	0.103	0.114	0.141	0.14	0.113	0.147	0.132	0.142	0.146	0.168	0.341	0.32	0.267	0.29
67	0.153	0.141	0.134	0.134	0.184	0.166	0.17	0.159	0.135	0.152	0.139	0.133	0.133	0.133	0.126	0.129		67	0.113	0.092	0.103	0.113	0.141	0.139	0.112	0.145	0.134	0.139	0.146	0.169	0.343	0.32	0.268	0.29
67.25	0.153	0.141	0.135	0.134	0.183	0.166	0.17	0.159	0.134	0.154	0.138	0.133	0.131	0.134	0.126	0.127		67.25	0.113	0.091	0.101	0.113	0.139	0.14	0.11	0.145	0.133	0.14	0.144	0.167	0.345	0.32	0.267	0.29
67.5	0.154	0.141	0.135	0.135	0.18	0.165	0.167	0.159	0.134	0.155	0.14	0.135	0.127	0.13	0.126	0.126		67.5	0.117	0.089	0.102	0.111	0.135	0.139	0.108	0.143	0.133	0.14	0.143	0.168	0.345	0.318	0.267	0.29
67.75	0.154	0.144	0.136	0.136	0.18	0.166	0.167	0.159	0.134	0.156	0.14	0.135	0.126	0.131	0.124	0.125		67.75	0.113	0.09	0.102	0.111	0.133	0.139	0.108	0.143	0.133	0.142	0.143	0.167	0.344	0.317	0.267	0.289
68	0.156	0.144	0.136	0.135	0.18	0.165	0.168	0.159	0.135	0.156	0.141	0.137	0.125	0.13	0.125	0.125		68	0.114	0.089	0.101	0.113	0.133	0.137	0.106	0.142	0.134	0.14	0.145	0.167	0.345	0.316	0.266	0.287
68.25	0.155	0.145	0.138	0.136	0.18	0.166	0.168	0.16	0.135	0.156	0.14	0.136	0.125	0.131	0.125	0.126		68.25	0.113	0.089	0.102	0.111	0.131	0.136	0.104	0.142	0.134	0.14	0.144	0.168	0.346	0.317	0.265	0.289
68.5	0.155	0.145	0.138	0.137	0.179	0.167	0.167	0.16	0.137	0.158	0.14	0.137	0.124	0.131	0.124	0.126		68.5	0.116	0.091	0.106	0.113	0.132	0.134	0.105	0.141	0.133	0.141	0.144	0.169	0.345	0.318	0.269	0.291
68.75	0.157	0.145	0.139	0.139	0.18	0.167	0.169	0.162	0.139	0.159	0.143	0.138	0.125	0.13	0.125	0.125		68.75	0.115	0.09	0.107	0.115	0.132	0.137	0.106	0.145	0.135	0.144	0.144	0.17	0.347	0.319	0.27	0.291
69	0.157	0.146	0.141	0.139	0.183	0.168	0.171	0.162	0.139	0.162	0.144	0.14	0.129	0.133	0.125	0.128		69	0.115	0.091	0.103	0.115	0.135	0.137	0.108	0.144	0.135	0.142	0.145	0.172	0.348	0.323	0.271	0.294
69.25	0.157	0.145	0.141	0.139	0.184	0.169	0.171	0.164	0.139	0.16	0.143	0.138	0.13	0.134	0.128	0.129		69.25	0.114	0.09	0.104	0.115	0.137	0.138	0.11	0.144	0.134	0.144	0.145	0.169	0.353	0.324	0.275	0.295
69.5	0.161	0.147	0.142	0.14	0.185	0.171	0.173	0.165	0.142	0.161	0.145	0.139	0.132	0.135	0.128	0.129		69.5	0.116	0.092	0.104	0.113	0.137	0.138	0.109	0.143	0.134	0.142	0.147	0.169	0.353	0.325	0.276	0.297
69.75	0.16	0.147	0.143	0.141	0.187	0.171	0.172	0.165	0.143	0.163	0.147	0.141	0.133	0.135	0.129	0.13		69.75	0.116	0.091	0.104	0.115	0.135	0.139	0.11	0.145	0.137	0.141	0.146	0.172	0.355	0.326	0.277	0.298
70	0.162	0.147	0.143	0.14	0.188	0.172	0.175	0.166	0.143	0.163	0.146	0.142	0.134	0.136	0.13	0.131		70	0.115	0.093	0.105	0.114	0.139	0.14	0.112	0.148	0.136	0.14	0.144	0.17	0.356	0.329	0.277	0.298
70.25	0.161	0.149	0.143	0.141	0.191	0.174	0.177	0.168	0.142	0.162	0.146	0.141	0.136	0.137	0.131	0.133		70.25	0.117	0.091	0.104	0.115	0.135	0.138	0.11	0.144	0.135	0.143	0.146	0.171	0.357	0.33	0.278	0.296
70.5	0.161	0.15	0.143	0.141	0.19	0.173	0.177	0.17	0.143	0.163	0.148	0.141	0.135	0.137	0.131	0.133		70.5	0.113	0.092	0.103	0.113	0.141	0.139	0.11	0.15	0.136	0.143	0.148	0.171	0.358	0.33	0.282	0.301
70.75	0.163	0.15	0.146	0.142	0.19	0.174	0.178	0.171	0.145	0.164	0.15	0.144	0.136	0.138	0.132	0.134		70.75	0.116	0.093	0.104	0.115	0.142	0.14	0.113	0.148	0.136	0.144	0.147	0.171	0.36	0.335	0.281	0.302
71	0.164	0.151	0.147	0.143	0.191	0.177	0.18	0.172	0.148	0.165	0.15	0.144	0.137	0.14	0.133	0.135		71	0.115	0.093	0.105	0.115	0.139	0.139	0.111	0.147	0.138	0.142	0.145	0.171	0.361	0.332	0.28	0.296
71.25	0.166	0.15	0.147	0.143	0.192	0.176	0.18	0.171	0.147	0.163	0.149	0.145	0.138	0.14	0.133	0.134		71.25	0.117	0.093	0.106	0.116	0.142	0.143	0.113	0.15	0.137	0.141	0.144	0.171	0.364	0.337	0.284	0.298
71.5	0.164	0.152	0.147	0.145	0.194	0.176	0.182	0.174	0.148	0.162	0.151	0.145	0.141	0.141	0.136	0.136		71.5	0.115	0.092	0.102	0.116	0.141	0.141	0.113	0.15	0.137	0.143	0.147	0.17	0.366	0.338	0.285	0.304
71.75	0.163	0.152	0.146	0.145	0.196	0.177	0.183	0.174	0.146	0.162	0.151	0.145	0.144	0.143	0.136	0.137		71.75	0.114	0.09	0.105	0.115	0.144	0.141	0.115	0.151	0.136	0.143	0.148	0.169	0.367	0.341	0.287	0.305
72	0.165	0.153	0.147	0.145	0.194	0.177	0.183	0.174	0.147	0.161	0.15	0.146	0.14	0.141	0.137	0.136		72	0.116	0.091	0.103	0.113	0.143	0.142	0.114	0.15	0.137	0.141	0.146	0.17	0.368	0.341	0.289	0.306
72.25	0.164	0.151	0.147	0.145	0.197	0.179	0.184	0.175	0.145	0.16	0.151	0.146	0.144	0.143	0.138	0.138		72.25	0.116	0.093	0.107	0.117	0.143	0.141	0.113	0.151	0.137	0.142	0.148	0.17	0.369	0.342	0.291	0.308
72.5	0.163	0.152	0.149	0.146	0.198	0.179	0.185	0.175	0.147	0.16	0.151	0.145	0.143	0.144	0.138	0.138		72.5	0.114	0.091	0.104	0.115	0.145	0.142	0.116	0.151	0.137	0.141	0.145	0.168	0.372	0.345	0.291	0.311
72.75	0.165	0.153	0.148	0.146	0.196	0.179	0.185	0.177	0.148	0.161	0.152	0.146	0.143	0.144	0.135	0.138		72.75	0.114	0.089	0.104	0.115	0.147	0.143	0.116	0.152	0.137	0.141	0.143	0.169	0.372	0.344	0.293	0.312
73	0.166	0.153	0.15	0.146	0.199	0.179	0.186	0.177	0.148	0.161	0.153	0.148	0.145	0.145	0.138	0.139		73	0.115	0.094	0.105	0.117	0.143	0.142	0.116	0.15	0.14	0.144	0.149	0.171	0.372	0.345	0.294	0.311
73.25	0.168	0.154	0.15	0.147	0.198	0.18	0.186	0.178	0.15	0.16	0.153	0.148	0.144	0.143	0.138	0.138		73.25	0.116	0.091	0.104	0.117	0.145	0.142	0.115	0.151	0.138	0.143	0.147	0.171	0.374	0.346	0.295	0.312
73.5	0.169	0.156	0.151	0.148	0.198	0.182	0.186	0.178	0.151	0.164	0.156	0.15	0.145	0.146	0.139	0.139		73.5	0.118	0.092	0.105	0.117	0.144	0.143	0.116	0.152	0.139	0.145	0.146	0.17	0.371	0.345	0.295	0.313
73.75	0.169	0.155	0.151	0.147	0.198	0.182	0.187	0.178	0.153	0.161	0.154	0.15	0.144	0.145	0.138	0.138		73.75	0.117	0.092	0.106	0.117	0.145	0.142	0.116	0.153	0.14	0.144	0.147	0.172	0.377	0.348	0.297	0.314
74	0.169	0.156	0.15	0.147	0.197	0.182	0.187	0.179	0.152	0.165	0.155	0.15	0.143	0.145	0.139	0.139		74	0.115	0.093	0.105	0.119	0.144	0.14	0.116	0.151	0.137	0.142	0.147	0.171	0.375	0.346	0.297	0.313
74.25	0.17	0.156	0.152	0.149	0.199	0.182	0.188	0.18	0.153	0.168	0.155	0.151	0.145	0.146	0.139	0.139		74.25	0.12	0.094	0.106	0.115	0.146	0.142	0.116	0.152	0.138	0.144	0.148	0.172	0.377	0.349	0.298	0.316
74.5	0.169	0.156	0.153	0.15	0.2	0.182	0.188	0.18	0.153	0.167	0.157	0.15	0.145	0.146	0.14	0.14		74.5	0.118	0.091	0.106	0.116	0.144	0.141	0.115	0.15	0.139	0.142	0.147	0.173	0.38	0.35	0.298	0.316
74.75	0.171	0.157	0.153	0.149	0.199	0.183	0.188	0.18	0.153	0.166	0.157	0.151	0.144	0.146	0.138	0.139		74.75	0.117	0.094	0.107	0.117	0.143	0.142	0.115	0.152	0.138	0.143	0.148	0.173	0.381	0.347	0.299	0.313
75	0.17	0.157	0.153	0.15	0.202	0.184	0.19	0.182	0.152	0.166	0.157	0.151	0.145	0.147	0.14	0.14		75	0.117	0.093	0.106	0.115	0.147	0.142	0.116	0.152	0.139	0.146	0.146	0.17	0.38	0.35	0.299	0.317
75.25	0.169	0.157	0.153	0.15	0.2	0.184	0.189	0.182	0.154	0.165	0.158	0.151	0.145	0.146	0.14	0.14		75.25	0.115	0.093	0.105	0.117	0.146	0.14	0.115	0.151	0.137	0.144	0.146	0.171	0.384	0.35	0.303	0.317
75.5	0.171	0.157	0.154	0.151	0.202	0.185	0.19	0.182	0.154	0.165	0.159	0.153	0.145	0.147	0.141	0.14		75.5	0.119	0.094	0.104	0.118	0.145	0.141	0.116	0.148	0.138	0.142	0.146	0.173	0.383	0.351	0.302	0.317
75.75	0.171	0.158	0.155	0.152	0.2	0.184	0.19	0.182	0.156	0.167	0.159	0.153	0.145	0.147	0.141	0.142		75.75	0.118	0.093	0.105	0.117	0.145	0.139	0.115	0.15	0.14	0.142	0.147	0.171	0.385	0.352	0.302	0.318
76	0.168	0.157	0.153	0.15	0.202	0.186	0.191	0.184	0.151	0.164	0.158	0.15	0.147	0.15	0.144	0.142		76	0.115	0.091	0.104	0.116	0.144	0.139	0.115	0.151	0.138	0.142	0.149	0.169	0.386	0.353	0.303	0.321
76.25	0.167	0.159	0.153	0.15	0.202	0.186	0.191	0.184	0.15	0.165	0.158	0.151	0.145	0.15	0.143	0.142		76.25	0.11	0.091	0.1	0.112	0.143	0.141	0.113	0.148	0.134	0.136	0.144	0.167	0.387	0.354	0.303	0.322
76.5	0.166	0.157	0.152	0.15	0.203	0.189	0.193	0.184	0.149	0.164	0.158	0.151	0.148	0.151	0.145	0.144		76.5	0.106	0.091	0.1	0.113	0.147	0.144	0.118	0.154	0.132	0.136	0.144	0.164	0.389	0.357	0.308	0.325
76.75	0.165	0.158	0.151	0.15	0.201	0.188	0.193	0.185	0.147	0.161	0.157	0.149	0.145	0.149	0.142	0.141		76.75	0.106	0.089	0.1	0.109	0.145	0.14	0.114	0.152	0.13	0.136	0.14	0.163	0.389	0.355	0.305	0.323
77	0.169	0.158	0.154	0.152	0.202	0.188	0.194	0.186	0.152	0.165	0.158	0.152	0.148	0.152	0.143	0.143		77	0.112	0.09	0.102	0.112	0.145	0.144	0.116	0.155	0.137	0.138	0.142	0.168	0.392	0.36	0.308	0.325
77.25	0.169	0.16	0.155	0.152	0.205	0.19	0.195	0.187	0.154	0.166	0.161	0.153	0.148	0.152	0.145	0.144		77.25	0.109	0.091	0.101	0.114	0.147	0.142	0.117	0.155	0.136	0.139	0.143	0.169	0.391	0.362	0.309	0.328
77.5	0.168	0.161	0.156	0.153	0.205	0.19	0.195	0.187	0.154	0.165	0.16	0.154	0.148	0.153	0.144	0.144		77.5	0.113	0.092	0.104	0.114	0.146	0.142	0.117	0.155	0.138	0.14	0.145	0.167	0.393	0.362	0.316	0.327
77.75	0.17	0.16	0.157	0.155	0.204	0.191	0.196	0.188	0.156	0.167	0.16	0.154	0.148	0.154	0.146	0.144		77.75	0.117	0.094	0.104	0.116	0.147	0.145	0.118	0.156	0.14	0.143	0.145	0.171	0.396	0.362	0.321	0.331
78	0.173	0.162	0.158	0.155	0.207	0.191	0.197	0.189	0.157	0.169	0.164	0.158	0.151	0.155	0.146	0.146		78	0.114	0.094	0.107	0.117	0.147	0.142	0.117	0.155	0.141	0.142	0.148	0.17	0.395	0.365	0.323	0.329
78.25	0.174	0.162	0.16	0.156	0.207	0.192	0.198	0.191	0.161	0.169	0.164	0.158	0.153	0.155	0.15	0.147		78.25	0.119	0.093	0.108	0.118	0.148	0.141	0.121	0.158	0.141	0.144	0.15	0.17	0.398	0.366	0.324	0.332
78.5	0.175	0.163	0.16	0.155	0.207	0.192	0.198	0.19	0.16	0.169	0.165	0.157	0.152	0.158	0.148	0.147		78.5	0.116	0.093	0.105	0.118	0.148	0.145	0.118	0.158	0.142	0.144	0.149	0.173	0.401	0.364	0.325	0.334
78.75	0.176	0.163	0.161	0.156	0.208	0.194	0.199	0.191	0.162	0.17	0.165	0.158	0.154	0.158	0.15	0.147		78.75	0.119	0.094	0.108	0.119	0.148	0.143	0.118	0.158	0.143	0.147	0.15	0.173	0.401	0.368	0.326	0.333
79	0.179	0.166	0.163	0.158	0.213	0.195	0.201	0.192	0.164	0.173	0.169	0.161	0.157	0.16	0.15	0.149		79	0.117	0.094	0.105	0.116	0.149	0.143	0.119	0.157	0.139	0.147	0.148	0.171	0.403	0.368	0.328	0.331
79.25	0.179	0.166	0.164	0.158	0.209	0.195	0.202	0.193	0.166	0.173	0.17	0.162	0.152	0.16	0.15	0.149		79.25	0.116	0.095	0.106	0.118	0.15	0.141	0.12	0.156	0.143	0.146	0.15	0.171	0.404	0.369	0.331	0.333
79.5	0.182	0.168	0.167	0.161	0.209	0.195	0.202	0.193	0.168	0.175	0.17	0.163	0.154	0.159	0.149	0.148		79.5	0.116	0.094	0.107	0.117	0.149	0.141	0.12	0.159	0.14	0.144	0.15	0.173	0.406	0.369	0.33	0.337
79.75	0.181	0.168	0.166	0.16	0.212	0.195	0.203	0.194	0.169	0.175	0.171	0.164	0.155	0.16	0.152	0.15		79.75	0.117	0.096	0.108	0.118	0.151	0.144	0.121	0.157	0.143	0.144	0.151	0.174	0.405	0.369	0.332	0.337
80	0.181	0.168	0.168	0.161	0.213	0.197	0.204	0.194	0.17	0.174	0.171	0.165	0.157	0.16	0.153	0.15		80	0.119	0.096	0.108	0.118	0.149	0.141	0.12	0.157	0.142	0.145	0.15	0.173	0.406	0.369	0.331	0.336
80.25	0.18	0.168	0.167	0.161	0.213	0.197	0.204	0.196	0.169	0.183	0.171	0.164	0.158	0.161	0.152	0.151		80.25	0.117	0.095	0.108	0.119	0.15	0.146	0.12	0.158	0.142	0.146	0.147	0.174	0.407	0.369	0.334	0.339
80.5	0.182	0.169	0.168	0.162	0.211	0.199	0.204	0.196	0.171	0.184	0.173	0.166	0.156	0.161	0.153	0.15		80.5	0.118	0.096	0.106	0.118	0.148	0.141	0.118	0.157	0.14	0.147	0.148	0.175	0.406	0.369	0.332	0.337
80.75	0.184	0.17	0.169	0.163	0.212	0.198	0.205	0.197	0.172	0.185	0.174	0.166	0.156	0.162	0.153	0.15		80.75	0.12	0.095	0.11	0.12	0.147	0.142	0.119	0.159	0.141	0.147	0.151	0.176	0.411	0.372	0.334	0.342
81	0.183	0.168	0.168	0.161	0.215	0.2	0.206	0.198	0.17	0.185	0.173	0.165	0.158	0.164	0.153	0.152		81	0.122	0.099	0.108	0.121	0.15	0.144	0.12	0.157	0.146	0.148	0.152	0.178	0.409	0.373	0.335	0.341
81.25	0.184	0.169	0.169	0.162	0.214	0.2	0.206	0.198	0.171	0.187	0.173	0.165	0.158	0.162	0.154	0.151		81.25	0.118	0.095	0.104	0.12	0.149	0.143	0.119	0.158	0.141	0.149	0.147	0.173	0.41	0.375	0.335	0.344
81.5	0.182	0.17	0.17	0.163	0.214	0.2	0.207	0.198	0.17	0.185	0.174	0.166	0.159	0.164	0.156	0.152		81.5	0.119	0.094	0.107	0.119	0.15	0.144	0.12	0.156	0.142	0.149	0.15	0.174	0.413	0.375	0.339	0.345
81.75	0.178	0.17	0.166	0.161	0.218	0.201	0.209	0.2	0.165	0.183	0.172	0.163	0.163	0.166	0.156	0.153		81.75	0.115	0.093	0.103	0.118	0.15	0.143	0.12	0.158	0.137	0.146	0.145	0.17	0.414	0.378	0.339	0.347
82	0.18	0.169	0.167	0.161	0.217	0.203	0.21	0.2	0.166	0.185	0.172	0.164	0.162	0.166	0.158	0.154		82	0.114	0.092	0.104	0.114	0.15	0.146	0.121	0.158	0.138	0.141	0.145	0.17	0.416	0.378	0.34	0.346
82.25	0.177	0.169	0.165	0.162	0.216	0.203	0.209	0.201	0.162	0.183	0.171	0.164	0.16	0.165	0.158	0.154		82.25	0.111	0.09	0.101	0.115	0.152	0.146	0.122	0.162	0.138	0.141	0.144	0.169	0.416	0.38	0.344	0.348
82.5	0.176	0.17	0.165	0.162	0.219	0.204	0.212	0.202	0.161	0.183	0.171	0.163	0.163	0.168	0.158	0.157		82.5	0.108	0.089	0.099	0.111	0.154	0.144	0.123	0.162	0.136	0.138	0.143	0.166	0.419	0.382	0.343	0.353
82.75	0.177	0.169	0.167	0.162	0.219	0.205	0.212	0.202	0.162	0.187	0.171	0.163	0.162	0.167	0.158	0.157		82.75	0.105	0.09	0.1	0.111	0.151	0.148	0.123	0.157	0.136	0.137	0.143	0.165	0.416	0.38	0.344	0.35
83	0.173	0.17	0.164	0.161	0.219	0.206	0.213	0.203	0.158	0.184	0.17	0.162	0.164	0.167	0.159	0.157		83	0.105	0.086	0.1	0.108	0.154	0.146	0.125	0.163	0.138	0.136	0.14	0.165	0.422	0.385	0.349	0.354
83.25	0.179	0.171	0.168	0.163	0.223	0.207	0.215	0.204	0.164	0.187	0.172	0.164	0.165	0.168	0.162	0.158		83.25	0.108	0.089	0.1	0.112	0.153	0.146	0.122	0.162	0.138	0.139	0.143	0.17	0.421	0.383	0.347	0.352
83.5	0.181	0.172	0.169	0.165	0.219	0.207	0.212	0.205	0.164	0.188	0.174	0.166	0.163	0.166	0.161	0.157		83.5	0.11	0.09	0.1	0.116	0.153	0.146	0.123	0.163	0.142	0.142	0.143	0.17	0.423	0.385	0.347	0.354
83.75	0.18	0.174	0.169	0.165	0.222	0.207	0.214	0.207	0.168	0.189	0.175	0.167	0.166	0.168	0.163	0.158		83.75	0.111	0.093	0.103	0.116	0.152	0.147	0.123	0.159	0.141	0.141	0.145	0.171	0.423	0.383	0.349	0.354
84	0.185	0.174	0.17	0.166	0.225	0.209	0.216	0.207	0.17	0.189	0.178	0.169	0.168	0.169	0.165	0.16		84	0.117	0.093	0.104	0.12	0.153	0.144	0.125	0.161	0.143	0.147	0.146	0.171	0.422	0.387	0.35	0.357
84.25	0.185	0.176	0.172	0.168	0.223	0.209	0.216	0.207	0.172	0.192	0.178	0.17	0.166	0.169	0.164	0.159		84.25	0.114	0.094	0.104	0.116	0.151	0.145	0.123	0.161	0.141	0.145	0.147	0.172	0.424	0.387	0.351	0.356
84.5	0.186	0.176	0.173	0.167	0.223	0.209	0.216	0.208	0.174	0.192	0.18	0.171	0.167	0.17	0.164	0.16		84.5	0.118	0.096	0.107	0.117	0.153	0.146	0.124	0.163	0.143	0.147	0.145	0.171	0.426	0.388	0.353	0.36
84.75	0.19	0.178	0.177	0.171	0.224	0.211	0.217	0.209	0.177	0.198	0.182	0.174	0.168	0.171	0.166	0.16		84.75	0.116	0.095	0.105	0.118	0.152	0.146	0.122	0.161	0.146	0.148	0.148	0.173	0.426	0.387	0.352	0.357
85	0.191	0.178	0.177	0.17	0.221	0.211	0.217	0.209	0.178	0.195	0.183	0.175	0.163	0.169	0.164	0.159		85	0.117	0.094	0.105	0.12	0.15	0.145	0.123	0.159	0.144	0.148	0.149	0.173	0.426	0.385	0.352	0.358
85.25	0.192	0.18	0.178	0.171	0.22	0.212	0.215	0.209	0.18	0.2	0.185	0.176	0.162	0.17	0.164	0.16		85.25	0.119	0.096	0.106	0.122	0.148	0.144	0.119	0.158	0.147	0.15	0.148	0.175	0.426	0.385	0.352	0.354
85.5	0.193	0.18	0.18	0.171	0.218	0.211	0.215	0.208	0.181	0.198	0.185	0.178	0.161	0.168	0.162	0.158		85.5	0.121	0.096	0.108	0.12	0.145	0.143	0.119	0.154	0.148	0.149	0.149	0.177	0.422	0.384	0.351	0.357
85.75	0.197	0.181	0.182	0.173	0.219	0.211	0.215	0.209	0.186	0.203	0.188	0.179	0.159	0.167	0.162	0.157		85.75	0.122	0.098	0.109	0.123	0.143	0.142	0.12	0.153	0.147	0.151	0.155	0.179	0.424	0.382	0.351	0.354
86	0.196	0.182	0.183	0.174	0.22	0.211	0.217	0.209	0.187	0.203	0.19	0.181	0.161	0.169	0.163	0.159		86	0.123	0.097	0.11	0.124	0.144	0.141	0.119	0.155	0.148	0.153	0.155	0.179	0.423	0.381	0.35	0.355
86.25	0.197	0.184	0.185	0.176	0.222	0.214	0.219	0.212	0.189	0.205	0.191	0.182	0.163	0.171	0.164	0.159		86.25	0.125	0.096	0.112	0.125	0.145	0.144	0.119	0.157	0.148	0.153	0.157	0.178	0.425	0.383	0.353	0.356
86.5	0.196	0.183	0.185	0.175	0.223	0.215	0.219	0.212	0.188	0.205	0.19	0.182	0.164	0.17	0.165	0.16		86.5	0.124	0.099	0.112	0.124	0.148	0.146	0.12	0.159	0.151	0.154	0.157	0.181	0.427	0.388	0.355	0.358
86.75	0.199	0.185	0.187	0.178	0.226	0.216	0.22	0.213	0.191	0.208	0.192	0.184	0.168	0.172	0.166	0.163		86.75	0.125	0.097	0.112	0.128	0.148	0.144	0.123	0.159	0.152	0.156	0.159	0.178	0.428	0.388	0.36	0.362
87	0.199	0.182	0.186	0.176	0.228	0.216	0.222	0.214	0.189	0.205	0.191	0.182	0.169	0.175	0.167	0.165		87	0.126	0.098	0.113	0.127	0.152	0.148	0.124	0.16	0.153	0.154	0.158	0.181	0.432	0.392	0.363	0.365
87.25	0.196	0.184	0.186	0.176	0.229	0.217	0.225	0.216	0.187	0.205	0.189	0.181	0.17	0.175	0.169	0.166		87.25	0.124	0.1	0.11	0.124	0.149	0.145	0.122	0.162	0.152	0.155	0.155	0.181	0.433	0.393	0.371	0.366
87.5	0.191	0.183	0.18	0.175	0.231	0.219	0.225	0.216	0.182	0.202	0.188	0.179	0.173	0.176	0.169	0.167		87.5	0.115	0.094	0.105	0.119	0.152	0.148	0.126	0.162	0.147	0.147	0.152	0.173	0.436	0.397	0.373	0.368
87.75	0.19	0.182	0.179	0.174	0.232	0.22	0.227	0.217	0.179	0.206	0.187	0.178	0.173	0.177	0.17	0.166		87.75	0.112	0.092	0.104	0.118	0.154	0.147	0.125	0.162	0.145	0.145	0.15	0.172	0.438	0.396	0.375	0.369
88	0.189	0.183	0.18	0.173	0.233	0.22	0.229	0.219	0.176	0.202	0.186	0.176	0.175	0.18	0.173	0.17		88	0.11	0.092	0.1	0.116	0.156	0.148	0.128	0.166	0.142	0.143	0.148	0.169	0.438	0.398	0.379	0.372
88.25	0.186	0.183	0.179	0.176	0.234	0.222	0.231	0.22	0.174	0.204	0.185	0.176	0.177	0.18	0.173	0.169		88.25	0.108	0.089	0.101	0.114	0.155	0.148	0.128	0.163	0.143	0.141	0.147	0.168	0.44	0.4	0.379	0.372
88.5	0.187	0.182	0.178	0.175	0.237	0.223	0.232	0.22	0.173	0.202	0.186	0.175	0.179	0.181	0.174	0.171		88.5	0.107	0.087	0.1	0.112	0.156	0.148	0.127	0.165	0.141	0.14	0.146	0.167	0.441	0.402	0.38	0.372
88.75	0.188	0.183	0.179	0.176	0.236	0.223	0.232	0.219	0.176	0.203	0.186	0.175	0.179	0.181	0.174	0.169		88.75	0.103	0.087	0.095	0.111	0.157	0.151	0.126	0.165	0.138	0.139	0.145	0.164	0.443	0.4	0.382	0.373
89	0.186	0.184	0.179	0.177	0.239	0.226	0.233	0.223	0.174	0.202	0.189	0.176	0.183	0.184	0.178	0.174		89	0.1	0.088	0.098	0.11	0.157	0.149	0.129	0.164	0.137	0.136	0.143	0.164	0.442	0.405	0.381	0.375
89.25	0.19	0.184	0.179	0.175	0.239	0.225	0.234	0.223	0.175	0.207	0.192	0.176	0.181	0.183	0.176	0.173		89.25	0.104	0.089	0.095	0.113	0.16	0.15	0.13	0.167	0.14	0.141	0.143	0.167	0.446	0.406	0.387	0.376
89.5	0.192	0.185	0.182	0.178	0.24	0.226	0.236	0.224	0.179	0.206	0.192	0.181	0.181	0.185	0.177	0.173		89.5	0.105	0.09	0.098	0.112	0.158	0.151	0.13	0.165	0.14	0.138	0.145	0.179	0.445	0.405	0.386	0.377
89.75	0.19	0.187	0.182	0.178	0.239	0.226	0.237	0.225	0.179	0.208	0.193	0.181	0.182	0.185	0.178	0.172		89.75	0.108	0.091	0.1	0.111	0.162	0.151	0.131	0.167	0.142	0.141	0.149	0.184	0.447	0.408	0.388	0.377
90	0.193	0.186	0.184	0.179	0.241	0.228	0.236	0.225	0.183	0.208	0.194	0.182	0.182	0.185	0.178	0.174		90	0.113	0.092	0.102	0.113	0.158	0.15	0.131	0.169	0.141	0.146	0.149	0.184	0.447	0.405	0.389	0.377
90.25	0.194	0.187	0.185	0.18	0.241	0.228	0.237	0.225	0.183	0.21	0.196	0.183	0.182	0.184	0.178	0.173		90.25	0.108	0.09	0.1	0.114	0.157	0.148	0.129	0.166	0.142	0.144	0.149	0.18	0.449	0.409	0.388	0.376
90.5	0.197	0.19	0.187	0.181	0.24	0.228	0.236	0.227	0.186	0.211	0.202	0.185	0.181	0.184	0.177	0.174		90.5	0.115	0.093	0.102	0.116	0.157	0.149	0.13	0.167	0.144	0.144	0.151	0.186	0.449	0.409	0.39	0.378
90.75	0.198	0.19	0.189	0.184	0.242	0.23	0.238	0.228	0.187	0.211	0.204	0.187	0.183	0.185	0.18	0.174		90.75	0.111	0.092	0.102	0.115	0.154	0.151	0.13	0.165	0.144	0.147	0.15	0.185	0.449	0.407	0.39	0.377
91	0.197	0.19	0.19	0.184	0.238	0.229	0.236	0.228	0.188	0.214	0.205	0.187	0.179	0.183	0.176	0.174		91	0.113	0.093	0.103	0.116	0.154	0.149	0.129	0.163	0.144	0.147	0.151	0.184	0.448	0.406	0.391	0.376
91.25	0.201	0.193	0.193	0.185	0.238	0.23	0.237	0.227	0.191	0.214	0.205	0.189	0.177	0.182	0.177	0.172		91.25	0.113	0.093	0.103	0.117	0.152	0.146	0.127	0.161	0.146	0.144	0.153	0.186	0.445	0.403	0.389	0.376
91.5	0.2	0.192	0.192	0.184	0.238	0.229	0.237	0.227	0.192	0.217	0.207	0.19	0.176	0.183	0.176	0.172		91.5	0.114	0.093	0.104	0.117	0.15	0.148	0.126	0.162	0.144	0.147	0.153	0.185	0.448	0.403	0.388	0.375
91.75	0.201	0.193	0.195	0.186	0.236	0.23	0.237	0.228	0.194	0.215	0.207	0.189	0.174	0.181	0.175	0.171		91.75	0.115	0.093	0.103	0.116	0.148	0.146	0.124	0.162	0.146	0.147	0.154	0.186	0.444	0.402	0.389	0.37
92	0.203	0.195	0.195	0.186	0.235	0.23	0.236	0.228	0.195	0.216	0.209	0.19	0.172	0.182	0.175	0.171		92	0.116	0.094	0.103	0.116	0.146	0.145	0.122	0.159	0.147	0.146	0.154	0.186	0.443	0.401	0.39	0.373
92.25	0.204	0.194	0.195	0.187	0.237	0.23	0.236	0.229	0.197	0.22	0.209	0.194	0.175	0.181	0.178	0.173		92.25	0.117	0.093	0.106	0.118	0.145	0.144	0.123	0.16	0.15	0.148	0.155	0.187	0.445	0.402	0.39	0.375
92.5	0.202	0.197	0.196	0.189	0.239	0.232	0.238	0.229	0.198	0.218	0.211	0.194	0.176	0.182	0.181	0.171		92.5	0.117	0.093	0.102	0.118	0.148	0.145	0.123	0.159	0.147	0.148	0.157	0.186	0.446	0.404	0.39	0.374
92.75	0.203	0.195	0.197	0.188	0.239	0.231	0.24	0.231	0.199	0.218	0.212	0.195	0.177	0.183	0.181	0.174		92.75	0.121	0.096	0.106	0.12	0.15	0.145	0.123	0.16	0.145	0.152	0.155	0.188	0.449	0.405	0.394	0.378
93	0.205	0.197	0.197	0.19	0.241	0.234	0.24	0.231	0.199	0.22	0.211	0.195	0.177	0.184	0.181	0.174		93	0.119	0.094	0.105	0.117	0.149	0.148	0.125	0.159	0.145	0.147	0.157	0.187	0.449	0.408	0.397	0.378
93.25	0.209	0.199	0.2	0.19	0.245	0.235	0.243	0.234	0.203	0.222	0.213	0.196	0.182	0.187	0.184	0.175		93.25	0.122	0.096	0.107	0.119	0.151	0.148	0.127	0.164	0.147	0.15	0.156	0.188	0.45	0.408	0.398	0.379
93.5	0.206	0.197	0.199	0.191	0.245	0.236	0.245	0.234	0.199	0.219	0.213	0.197	0.181	0.186	0.185	0.178		93.5	0.117	0.094	0.106	0.118	0.152	0.149	0.128	0.165	0.146	0.15	0.155	0.188	0.453	0.411	0.4	0.383
93.75	0.21	0.199	0.201	0.192	0.246	0.237	0.247	0.235	0.203	0.222	0.215	0.197	0.182	0.187	0.186	0.178		93.75	0.12	0.095	0.107	0.12	0.152	0.149	0.13	0.164	0.148	0.15	0.157	0.19	0.454	0.41	0.401	0.383
94	0.211	0.201	0.202	0.194	0.247	0.238	0.247	0.236	0.205	0.224	0.217	0.199	0.185	0.187	0.187	0.179		94	0.12	0.094	0.106	0.12	0.151	0.15	0.128	0.166	0.152	0.15	0.156	0.188	0.454	0.412	0.401	0.382
94.25	0.21	0.201	0.202	0.194	0.251	0.239	0.249	0.238	0.204	0.224	0.218	0.198	0.188	0.19	0.188	0.18		94.25	0.12	0.096	0.106	0.118	0.155	0.151	0.128	0.165	0.148	0.151	0.155	0.188	0.458	0.413	0.404	0.385
94.5	0.213	0.201	0.205	0.194	0.251	0.24	0.251	0.239	0.208	0.225	0.219	0.201	0.19	0.191	0.189	0.18		94.5	0.121	0.096	0.106	0.118	0.156	0.15	0.129	0.17	0.151	0.151	0.157	0.188	0.459	0.415	0.404	0.387
94.75	0.211	0.202	0.204	0.195	0.25	0.241	0.251	0.238	0.207	0.226	0.218	0.2	0.188	0.191	0.19	0.183		94.75	0.12	0.094	0.108	0.12	0.159	0.151	0.132	0.166	0.149	0.152	0.157	0.189	0.46	0.415	0.408	0.385
95	0.213	0.203	0.206	0.195	0.253	0.242	0.254	0.24	0.207	0.225	0.22	0.201	0.192	0.192	0.192	0.184		95	0.125	0.096	0.108	0.121	0.156	0.148	0.134	0.166	0.15	0.152	0.158	0.19	0.462	0.419	0.411	0.389
95.25	0.211	0.203	0.204	0.197	0.254	0.243	0.254	0.242	0.205	0.225	0.219	0.202	0.193	0.194	0.192	0.183		95.25	0.122	0.094	0.11	0.121	0.157	0.151	0.135	0.168	0.151	0.152	0.155	0.189	0.461	0.417	0.413	0.386
95.5	0.213	0.202	0.208	0.197	0.255	0.244	0.254	0.243	0.208	0.228	0.222	0.202	0.194	0.194	0.193	0.185		95.5	0.118	0.096	0.105	0.12	0.16	0.151	0.135	0.169	0.148	0.15	0.156	0.188	0.463	0.42	0.412	0.386
95.75	0.213	0.204	0.207	0.197	0.257	0.244	0.256	0.244	0.208	0.226	0.22	0.202	0.196	0.194	0.194	0.186		95.75	0.12	0.095	0.107	0.118	0.161	0.151	0.136	0.17	0.15	0.152	0.156	0.188	0.465	0.419	0.417	0.391
96	0.215	0.204	0.207	0.198	0.257	0.245	0.256	0.245	0.211	0.228	0.22	0.205	0.195	0.194	0.194	0.186		96	0.12	0.093	0.106	0.119	0.161	0.152	0.136	0.169	0.151	0.151	0.155	0.19	0.465	0.419	0.417	0.391
96.25	0.214	0.205	0.21	0.199	0.257	0.246	0.257	0.245	0.21	0.228	0.222	0.207	0.197	0.195	0.195	0.186		96.25	0.121	0.094	0.104	0.118	0.161	0.153	0.137	0.171	0.15	0.15	0.158	0.189	0.468	0.422	0.417	0.391
96.5	0.214	0.205	0.207	0.198	0.26	0.247	0.261	0.246	0.208	0.23	0.222	0.205	0.198	0.198	0.196	0.188		96.5	0.12	0.098	0.107	0.119	0.162	0.153	0.135	0.172	0.151	0.151	0.158	0.19	0.466	0.423	0.421	0.392
96.75	0.216	0.208	0.211	0.201	0.258	0.248	0.26	0.246	0.213	0.23	0.224	0.208	0.197	0.196	0.196	0.19		96.75	0.118	0.095	0.105	0.117	0.16	0.153	0.136	0.17	0.148	0.156	0.158	0.186	0.468	0.421	0.42	0.392
97	0.216	0.208	0.211	0.201	0.261	0.248	0.26	0.248	0.214	0.231	0.225	0.209	0.199	0.2	0.196	0.19		97	0.12	0.094	0.106	0.119	0.162	0.151	0.136	0.169	0.146	0.156	0.159	0.188	0.469	0.425	0.421	0.391
97.25	0.218	0.207	0.212	0.202	0.261	0.25	0.26	0.248	0.215	0.232	0.226	0.209	0.2	0.197	0.197	0.191		97.25	0.119	0.096	0.105	0.119	0.162	0.152	0.135	0.17	0.149	0.155	0.155	0.188	0.469	0.423	0.423	0.394
97.5	0.218	0.207	0.212	0.202	0.261	0.25	0.261	0.249	0.215	0.231	0.226	0.209	0.2	0.198	0.198	0.189		97.5	0.121	0.095	0.106	0.118	0.162	0.152	0.134	0.169	0.149	0.156	0.158	0.187	0.468	0.424	0.423	0.395
97.75	0.217	0.207	0.211	0.203	0.262	0.25	0.262	0.251	0.214	0.233	0.226	0.21	0.201	0.201	0.199	0.191		97.75	0.117	0.093	0.103	0.118	0.163	0.152	0.138	0.171	0.148	0.155	0.154	0.188	0.473	0.427	0.423	0.394
98	0.218	0.209	0.211	0.202	0.263	0.252	0.264	0.25	0.218	0.231	0.227	0.21	0.199	0.2	0.199	0.19		98	0.12	0.093	0.107	0.12	0.16	0.152	0.136	0.17	0.15	0.157	0.157	0.188	0.471	0.426	0.423	0.394
98.25	0.218	0.208	0.212	0.204	0.264	0.252	0.264	0.251	0.218	0.23	0.226	0.21	0.2	0.201	0.2	0.192		98.25	0.118	0.094	0.104	0.116	0.162	0.151	0.137	0.171	0.149	0.157	0.157	0.185	0.472	0.428	0.426	0.395
98.5	0.218	0.21	0.213	0.203	0.263	0.253	0.264	0.251	0.221	0.232	0.229	0.211	0.201	0.2	0.2	0.192		98.5	0.117	0.094	0.104	0.118	0.165	0.153	0.138	0.17	0.148	0.156	0.155	0.187	0.473	0.428	0.427	0.396
98.75	0.216	0.209	0.211	0.203	0.263	0.255	0.265	0.254	0.219	0.232	0.229	0.209	0.201	0.203	0.2	0.193		98.75	0.117	0.095	0.106	0.118	0.162	0.15	0.135	0.168	0.148	0.153	0.155	0.187	0.475	0.428	0.427	0.395
99	0.219	0.211	0.214	0.204	0.263	0.254	0.264	0.253	0.219	0.233	0.229	0.211	0.199	0.201	0.2	0.191		99	0.118	0.092	0.102	0.117	0.168	0.152	0.134	0.172	0.148	0.156	0.155	0.187	0.474	0.429	0.428	0.393
99.25	0.219	0.211	0.215	0.205	0.261	0.254	0.265	0.254	0.219	0.235	0.23	0.213	0.199	0.2	0.201	0.192		99.25	0.117	0.091	0.103	0.116	0.167	0.155	0.136	0.171	0.147	0.155	0.154	0.187	0.474	0.428	0.43	0.396
99.5	0.218	0.211	0.215	0.206	0.262	0.255	0.266	0.254	0.218	0.234	0.229	0.21	0.2	0.199	0.202	0.193		99.5	0.12	0.093	0.102	0.116	0.166	0.152	0.136	0.171	0.146	0.156	0.155	0.19	0.476	0.426	0.43	0.395
99.75	0.221	0.213	0.216	0.206	0.266	0.257	0.267	0.255	0.221	0.235	0.231	0.212	0.204	0.202	0.203	0.193		99.75	0.118	0.093	0.102	0.116	0.165	0.15	0.135	0.167	0.148	0.157	0.155	0.187	0.473	0.428	0.434	0.396
100	0.221	0.213	0.217	0.206	0.266	0.257	0.268	0.256	0.223	0.236	0.232	0.213	0.203	0.2	0.203	0.195		100	0.118	0.092	0.104	0.116	0.167	0.151	0.136	0.168	0.146	0.155	0.155	0.183	0.475	0.429	0.437	0.394
100.25	0.219	0.215	0.215	0.206	0.263	0.255	0.268	0.255	0.219	0.235	0.23	0.214	0.202	0.2	0.203	0.195		100.25	0.117	0.091	0.104	0.118	0.165	0.152	0.133	0.169	0.147	0.157	0.156	0.188	0.476	0.431	0.437	0.396
100.5	0.221	0.214	0.217	0.209	0.266	0.257	0.269	0.258	0.223	0.235	0.233	0.215	0.205	0.203	0.204	0.194		100.5	0.117	0.093	0.1	0.115	0.163	0.149	0.133	0.167	0.148	0.154	0.155	0.187	0.474	0.429	0.438	0.395
100.75	0.22	0.214	0.217	0.208	0.267	0.258	0.271	0.257	0.22	0.237	0.234	0.214	0.208	0.201	0.204	0.195		100.75	0.117	0.095	0.104	0.116	0.166	0.153	0.137	0.168	0.147	0.158	0.156	0.185	0.484	0.43	0.439	0.395
101	0.221	0.216	0.218	0.208	0.267	0.259	0.271	0.258	0.223	0.237	0.234	0.216	0.209	0.203	0.205	0.195		101	0.119	0.097	0.103	0.116	0.167	0.151	0.135	0.169	0.146	0.155	0.154	0.186	0.487	0.434	0.454	0.397
101.25	0.221	0.215	0.218	0.21	0.267	0.26	0.272	0.259	0.222	0.238	0.235	0.216	0.21	0.203	0.206	0.196		101.25	0.12	0.095	0.102	0.115	0.168	0.152	0.137	0.17	0.147	0.155	0.155	0.186	0.488	0.438	0.458	0.401
101.5	0.223	0.216	0.221	0.21	0.269	0.262	0.273	0.261	0.226	0.239	0.236	0.217	0.212	0.203	0.207	0.197		101.5	0.12	0.098	0.102	0.117	0.165	0.15	0.135	0.167	0.15	0.162	0.159	0.188	0.487	0.433	0.456	0.396
101.75	0.225	0.218	0.222	0.211	0.269	0.263	0.274	0.262	0.227	0.242	0.237	0.218	0.212	0.204	0.207	0.197		101.75	0.118	0.096	0.107	0.117	0.166	0.152	0.138	0.17	0.148	0.156	0.157	0.187	0.489	0.436	0.46	0.398
102	0.226	0.219	0.225	0.212	0.272	0.263	0.276	0.261	0.229	0.241	0.236	0.221	0.213	0.205	0.21	0.199		102	0.123	0.097	0.108	0.12	0.164	0.151	0.135	0.168	0.151	0.162	0.157	0.19	0.489	0.435	0.459	0.399
102.25	0.227	0.218	0.222	0.212	0.273	0.264	0.278	0.263	0.229	0.243	0.239	0.22	0.215	0.206	0.211	0.201		102.25	0.127	0.096	0.11	0.12	0.166	0.15	0.136	0.169	0.153	0.162	0.158	0.193	0.491	0.435	0.463	0.4
102.5	0.228	0.22	0.225	0.214	0.272	0.265	0.278	0.264	0.232	0.241	0.239	0.222	0.214	0.209	0.21	0.202		102.5	0.124	0.099	0.111	0.12	0.17	0.152	0.137	0.172	0.153	0.161	0.158	0.19	0.493	0.437	0.464	0.401
102.75	0.23	0.222	0.227	0.215	0.274	0.266	0.279	0.265	0.235	0.245	0.242	0.225	0.216	0.21	0.212	0.203		102.75	0.123	0.097	0.107	0.119	0.166	0.153	0.137	0.171	0.15	0.161	0.158	0.189	0.493	0.436	0.465	0.399
103	0.231	0.221	0.228	0.215	0.273	0.268	0.28	0.267	0.234	0.245	0.242	0.225	0.215	0.208	0.21	0.203		103	0.129	0.099	0.112	0.124	0.166	0.152	0.138	0.17	0.154	0.164	0.161	0.196	0.495	0.438	0.467	0.402
103.25	0.231	0.223	0.229	0.218	0.276	0.267	0.281	0.268	0.236	0.247	0.243	0.227	0.218	0.206	0.213	0.204		103.25	0.127	0.1	0.11	0.122	0.169	0.152	0.139	0.172	0.154	0.164	0.161	0.194	0.493	0.44	0.47	0.402
103.5	0.229	0.222	0.228	0.216	0.276	0.269	0.281	0.268	0.235	0.245	0.241	0.227	0.22	0.206	0.215	0.202		103.5	0.128	0.1	0.108	0.121	0.167	0.153	0.137	0.171	0.155	0.166	0.16	0.192	0.495	0.438	0.468	0.401
103.75	0.234	0.222	0.231	0.217	0.275	0.269	0.281	0.269	0.239	0.247	0.245	0.228	0.22	0.207	0.216	0.206		103.75	0.123	0.096	0.109	0.12	0.166	0.153	0.138	0.17	0.153	0.161	0.157	0.19	0.497	0.44	0.469	0.404
104	0.232	0.225	0.23	0.217	0.276	0.27	0.283	0.269	0.233	0.247	0.245	0.227	0.22	0.205	0.217	0.204		104	0.128	0.099	0.11	0.123	0.169	0.152	0.137	0.168	0.152	0.163	0.159	0.19	0.497	0.438	0.47	0.403
104.25	0.23	0.224	0.227	0.217	0.278	0.271	0.284	0.27	0.234	0.245	0.243	0.225	0.221	0.21	0.217	0.207		104.25	0.117	0.096	0.104	0.116	0.165	0.152	0.137	0.169	0.148	0.158	0.156	0.186	0.497	0.44	0.471	0.401
104.5	0.227	0.224	0.226	0.216	0.276	0.271	0.283	0.271	0.233	0.244	0.242	0.224	0.221	0.211	0.216	0.207		104.5	0.114	0.094	0.102	0.115	0.167	0.152	0.138	0.169	0.146	0.154	0.157	0.183	0.497	0.439	0.474	0.403
104.75	0.225	0.223	0.227	0.215	0.278	0.272	0.285	0.272	0.23	0.244	0.241	0.224	0.22	0.211	0.217	0.207		104.75	0.113	0.092	0.101	0.112	0.163	0.151	0.135	0.167	0.144	0.153	0.156	0.182	0.497	0.439	0.472	0.402
105	0.226	0.222	0.225	0.216	0.279	0.273	0.286	0.271	0.229	0.245	0.239	0.221	0.223	0.212	0.219	0.208		105	0.111	0.092	0.099	0.111	0.166	0.151	0.139	0.171	0.143	0.151	0.151	0.181	0.498	0.441	0.475	0.404
105.25	0.224	0.224	0.225	0.215	0.279	0.275	0.287	0.274	0.231	0.245	0.24	0.223	0.222	0.208	0.219	0.207		105.25	0.11	0.092	0.099	0.112	0.167	0.153	0.136	0.171	0.142	0.15	0.152	0.181	0.5	0.443	0.479	0.405
105.5	0.23	0.225	0.229	0.218	0.281	0.277	0.289	0.275	0.234	0.248	0.248	0.227	0.226	0.213	0.22	0.209		105.5	0.113	0.091	0.1	0.111	0.168	0.152	0.141	0.172	0.143	0.152	0.153	0.182	0.501	0.444	0.478	0.406
105.75	0.229	0.227	0.231	0.219	0.284	0.277	0.292	0.277	0.238	0.249	0.249	0.228	0.229	0.214	0.222	0.213		105.75	0.116	0.092	0.104	0.116	0.168	0.153	0.138	0.173	0.147	0.156	0.155	0.183	0.499	0.446	0.479	0.406
106	0.232	0.228	0.231	0.219	0.283	0.277	0.29	0.277	0.241	0.253	0.25	0.229	0.228	0.211	0.221	0.212		106	0.117	0.096	0.106	0.118	0.168	0.153	0.138	0.172	0.151	0.158	0.158	0.186	0.501	0.444	0.482	0.406
106.25	0.233	0.229	0.234	0.222	0.286	0.278	0.292	0.279	0.242	0.251	0.253	0.233	0.232	0.207	0.223	0.212		106.25	0.122	0.096	0.106	0.117	0.168	0.153	0.141	0.173	0.151	0.161	0.16	0.188	0.506	0.444	0.483	0.406
106.5	0.237	0.23	0.234	0.222	0.284	0.278	0.293	0.279	0.245	0.255	0.257	0.233	0.23	0.205	0.222	0.213		106.5	0.125	0.097	0.108	0.119	0.17	0.152	0.141	0.172	0.151	0.162	0.157	0.19	0.504	0.447	0.486	0.406
106.75	0.239	0.23	0.237	0.224	0.287	0.281	0.295	0.281	0.248	0.255	0.255	0.234	0.232	0.209	0.225	0.214		106.75	0.123	0.097	0.11	0.121	0.17	0.155	0.142	0.173	0.153	0.164	0.158	0.193	0.507	0.447	0.486	0.409
107	0.241	0.231	0.238	0.224	0.288	0.282	0.295	0.28	0.248	0.257	0.256	0.236	0.234	0.211	0.225	0.216		107	0.12	0.098	0.106	0.117	0.172	0.156	0.141	0.174	0.151	0.161	0.158	0.192	0.508	0.448	0.487	0.407
107.25	0.241	0.233	0.24	0.226	0.289	0.282	0.297	0.282	0.251	0.258	0.259	0.239	0.235	0.203	0.227	0.216		107.25	0.125	0.099	0.108	0.122	0.172	0.156	0.138	0.175	0.154	0.164	0.164	0.196	0.507	0.45	0.489	0.41
107.5	0.24	0.233	0.241	0.225	0.289	0.284	0.297	0.282	0.251	0.258	0.26	0.24	0.235	0.205	0.228	0.215		107.5	0.124	0.098	0.109	0.122	0.171	0.155	0.14	0.173	0.152	0.165	0.161	0.195	0.509	0.451	0.49	0.409
107.75	0.242	0.235	0.24	0.227	0.287	0.283	0.298	0.283	0.253	0.259	0.259	0.24	0.233	0.2	0.228	0.218		107.75	0.126	0.101	0.11	0.12	0.173	0.157	0.14	0.175	0.154	0.167	0.162	0.195	0.51	0.452	0.491	0.41
108	0.243	0.235	0.242	0.229	0.291	0.285	0.299	0.285	0.253	0.26	0.26	0.239	0.235	0.204	0.227	0.215		108	0.121	0.098	0.109	0.119	0.172	0.155	0.139	0.175	0.15	0.162	0.16	0.193	0.512	0.452	0.493	0.412
108.25	0.243	0.235	0.243	0.228	0.291	0.285	0.3	0.285	0.253	0.261	0.261	0.241	0.235	0.207	0.229	0.219		108.25	0.124	0.099	0.111	0.121	0.17	0.154	0.14	0.172	0.154	0.164	0.161	0.194	0.51	0.453	0.494	0.409
108.5	0.245	0.237	0.242	0.228	0.291	0.287	0.3	0.285	0.254	0.261	0.262	0.24	0.233	0.206	0.229	0.218		108.5	0.123	0.098	0.108	0.121	0.172	0.155	0.141	0.171	0.151	0.165	0.16	0.193	0.511	0.452	0.494	0.41
108.75	0.242	0.236	0.244	0.23	0.293	0.286	0.3	0.286	0.255	0.261	0.263	0.242	0.238	0.207	0.229	0.218		108.75	0.128	0.097	0.11	0.124	0.172	0.154	0.141	0.173	0.153	0.164	0.162	0.196	0.513	0.455	0.498	0.41
109	0.243	0.236	0.243	0.23	0.29	0.289	0.302	0.287	0.256	0.261	0.261	0.241	0.237	0.207	0.228	0.22		109	0.123	0.096	0.107	0.119	0.169	0.154	0.14	0.171	0.15	0.165	0.162	0.193	0.512	0.453	0.496	0.407
109.25	0.239	0.236	0.242	0.23	0.292	0.289	0.3	0.287	0.251	0.261	0.261	0.241	0.237	0.205	0.228	0.216		109.25	0.115	0.094	0.105	0.116	0.168	0.154	0.139	0.173	0.148	0.158	0.159	0.19	0.514	0.452	0.497	0.407
109.5	0.239	0.237	0.243	0.23	0.29	0.288	0.301	0.288	0.249	0.259	0.261	0.241	0.234	0.206	0.23	0.217		109.5	0.113	0.093	0.1	0.113	0.165	0.151	0.136	0.17	0.148	0.153	0.155	0.188	0.51	0.451	0.494	0.406
109.75	0.237	0.237	0.241	0.23	0.29	0.29	0.299	0.288	0.247	0.259	0.26	0.239	0.233	0.207	0.228	0.216		109.75	0.117	0.095	0.101	0.114	0.165	0.151	0.133	0.167	0.148	0.155	0.157	0.187	0.511	0.45	0.496	0.406
110	0.243	0.237	0.245	0.233	0.29	0.289	0.301	0.289	0.251	0.262	0.263	0.243	0.234	0.202	0.229	0.215		110	0.116	0.094	0.102	0.115	0.16	0.148	0.135	0.167	0.147	0.159	0.157	0.19	0.509	0.447	0.495	0.404
110.25	0.243	0.239	0.245	0.234	0.294	0.291	0.303	0.291	0.253	0.262	0.263	0.243	0.236	0.207	0.229	0.218		110.25	0.116	0.094	0.101	0.114	0.159	0.147	0.133	0.164	0.147	0.158	0.156	0.187	0.509	0.447	0.494	0.401
110.5	0.245	0.24	0.246	0.233	0.291	0.291	0.303	0.291	0.255	0.262	0.264	0.246	0.235	0.203	0.232	0.218		110.5	0.115	0.094	0.103	0.116	0.165	0.15	0.136	0.169	0.147	0.16	0.157	0.189	0.511	0.451	0.498	0.407
110.75	0.247	0.242	0.248	0.234	0.295	0.293	0.306	0.291	0.257	0.266	0.268	0.247	0.237	0.208	0.233	0.221		110.75	0.118	0.097	0.105	0.116	0.165	0.152	0.135	0.17	0.146	0.158	0.157	0.192	0.513	0.452	0.5	0.407
111	0.244	0.242	0.247	0.236	0.299	0.296	0.309	0.295	0.257	0.266	0.266	0.247	0.24	0.207	0.236	0.225		111	0.116	0.095	0.104	0.117	0.164	0.152	0.137	0.17	0.149	0.158	0.157	0.191	0.513	0.453	0.501	0.409
111.25	0.25	0.243	0.25	0.236	0.298	0.295	0.309	0.295	0.26	0.265	0.271	0.25	0.242	0.206	0.235	0.225		111.25	0.123	0.094	0.106	0.117	0.169	0.154	0.141	0.171	0.149	0.16	0.159	0.192	0.518	0.456	0.506	0.411
111.5	0.248	0.243	0.251	0.236	0.3	0.298	0.31	0.296	0.261	0.266	0.268	0.25	0.242	0.212	0.236	0.225		111.5	0.119	0.094	0.105	0.117	0.169	0.152	0.138	0.171	0.149	0.161	0.162	0.191	0.518	0.458	0.504	0.412
111.75	0.251	0.246	0.253	0.238	0.3	0.298	0.312	0.297	0.262	0.267	0.275	0.252	0.241	0.21	0.237	0.224		111.75	0.122	0.098	0.107	0.118	0.171	0.155	0.141	0.174	0.15	0.164	0.163	0.193	0.523	0.46	0.509	0.411
112	0.251	0.246	0.252	0.239	0.301	0.3	0.313	0.298	0.261	0.267	0.272	0.253	0.245	0.213	0.237	0.227		112	0.123	0.097	0.107	0.12	0.173	0.153	0.141	0.173	0.151	0.163	0.161	0.193	0.522	0.459	0.509	0.409
112.25	0.251	0.246	0.254	0.24	0.305	0.301	0.317	0.302	0.264	0.271	0.275	0.256	0.246	0.215	0.241	0.23		112.25	0.119	0.095	0.106	0.116	0.172	0.153	0.14	0.173	0.149	0.165	0.16	0.195	0.524	0.459	0.511	0.41
112.5	0.252	0.246	0.255	0.24	0.305	0.302	0.317	0.302	0.25	0.27	0.27	0.257	0.249	0.216	0.241	0.23		112.5	0.117	0.098	0.104	0.119	0.172	0.155	0.14	0.173	0.149	0.162	0.16	0.193	0.527	0.463	0.513	0.412
112.75	0.252	0.249	0.256	0.24	0.309	0.304	0.318	0.303	0.262	0.269	0.273	0.258	0.251	0.217	0.243	0.231		112.75	0.122	0.098	0.107	0.117	0.173	0.154	0.144	0.173	0.152	0.164	0.16	0.191	0.526	0.464	0.512	0.416
113	0.254	0.248	0.256	0.241	0.308	0.305	0.319	0.303	0.261	0.271	0.274	0.26	0.253	0.218	0.244	0.232		113	0.122	0.096	0.107	0.119	0.172	0.156	0.144	0.176	0.152	0.164	0.16	0.193	0.526	0.463	0.515	0.418
113.25	0.256	0.249	0.258	0.243	0.309	0.304	0.32	0.305	0.261	0.273	0.277	0.259	0.251	0.222	0.244	0.231		113.25	0.12	0.097	0.105	0.119	0.175	0.155	0.143	0.174	0.15	0.164	0.16	0.193	0.527	0.464	0.516	0.417
113.5	0.256	0.25	0.26	0.244	0.31	0.305	0.322	0.306	0.261	0.273	0.277	0.26	0.25	0.224	0.245	0.234		113.5	0.122	0.097	0.104	0.117	0.174	0.156	0.143	0.175	0.151	0.164	0.159	0.195	0.528	0.466	0.516	0.418
113.75	0.259	0.252	0.26	0.244	0.311	0.308	0.322	0.306	0.261	0.272	0.277	0.261	0.252	0.222	0.245	0.234		113.75	0.121	0.096	0.106	0.119	0.175	0.156	0.14	0.175	0.154	0.162	0.16	0.193	0.527	0.466	0.52	0.416
114	0.258	0.253	0.263	0.247	0.31	0.307	0.324	0.307	0.261	0.276	0.28	0.264	0.251	0.22	0.246	0.232		114	0.121	0.097	0.106	0.118	0.172	0.155	0.141	0.174	0.154	0.163	0.161	0.194	0.53	0.466	0.519	0.42
114.25	0.26	0.253	0.264	0.247	0.313	0.309	0.327	0.308	0.257	0.277	0.282	0.264	0.253	0.224	0.248	0.236		114.25	0.119	0.096	0.106	0.119	0.173	0.155	0.142	0.174	0.15	0.164	0.162	0.195	0.529	0.466	0.519	0.419
114.5	0.261	0.255	0.265	0.248	0.313	0.31	0.325	0.309	0.267	0.279	0.283	0.262	0.256	0.222	0.249	0.235		114.5	0.118	0.095	0.105	0.118	0.175	0.159	0.144	0.176	0.153	0.164	0.159	0.197	0.532	0.469	0.523	0.422
114.75	0.261	0.254	0.266	0.25	0.312	0.311	0.328	0.311	0.269	0.279	0.283	0.266	0.255	0.224	0.248	0.235		114.75	0.12	0.096	0.107	0.119	0.173	0.154	0.143	0.175	0.154	0.166	0.16	0.197	0.532	0.466	0.523	0.42
115	0.261	0.257	0.265	0.251	0.31	0.31	0.327	0.312	0.266	0.28	0.284	0.266	0.253	0.217	0.248	0.232		115	0.122	0.096	0.108	0.12	0.172	0.155	0.143	0.175	0.152	0.164	0.16	0.193	0.531	0.466	0.524	0.42
115.25	0.263	0.257	0.268	0.25	0.31	0.311	0.324	0.31	0.269	0.281	0.284	0.267	0.251	0.221	0.246	0.233		115.25	0.121	0.096	0.109	0.118	0.165	0.152	0.138	0.171	0.156	0.167	0.162	0.196	0.531	0.464	0.522	0.416
115.5	0.265	0.259	0.269	0.252	0.309	0.31	0.324	0.311	0.268	0.283	0.286	0.27	0.25	0.22	0.245	0.232		115.5	0.122	0.094	0.106	0.119	0.166	0.151	0.138	0.173	0.154	0.166	0.164	0.194	0.528	0.462	0.521	0.413
115.75	0.265	0.258	0.27	0.251	0.308	0.312	0.323	0.311	0.262	0.282	0.285	0.27	0.249	0.218	0.243	0.231		115.75	0.121	0.099	0.108	0.118	0.164	0.152	0.138	0.171	0.151	0.167	0.16	0.194	0.526	0.46	0.522	0.413
116	0.266	0.26	0.27	0.253	0.309	0.312	0.326	0.313	0.261	0.285	0.288	0.268	0.249	0.218	0.246	0.232		116	0.122	0.097	0.107	0.118	0.161	0.152	0.135	0.168	0.157	0.168	0.161	0.195	0.528	0.46	0.521	0.412
116.25	0.265	0.26	0.271	0.253	0.308	0.312	0.324	0.312	0.263	0.284	0.287	0.272	0.245	0.219	0.244	0.231		116.25	0.123	0.098	0.109	0.12	0.162	0.15	0.136	0.165	0.153	0.169	0.163	0.195	0.53	0.458	0.521	0.413
116.5	0.267	0.262	0.272	0.254	0.309	0.314	0.326	0.314	0.262	0.284	0.288	0.273	0.248	0.22	0.244	0.231		116.5	0.12	0.096	0.108	0.118	0.163	0.151	0.137	0.167	0.152	0.167	0.161	0.196	0.53	0.459	0.523	0.412
116.75	0.269	0.262	0.272	0.254	0.313	0.315	0.328	0.315	0.263	0.287	0.289	0.273	0.25	0.221	0.246	0.233		116.75	0.12	0.097	0.106	0.116	0.166	0.151	0.139	0.169	0.152	0.168	0.161	0.197	0.534	0.462	0.527	0.414
117	0.267	0.263	0.273	0.255	0.315	0.315	0.331	0.316	0.264	0.286	0.288	0.273	0.252	0.223	0.249	0.235		117	0.12	0.096	0.107	0.117	0.166	0.15	0.138	0.172	0.152	0.167	0.161	0.194	0.533	0.465	0.528	0.415
117.25	0.268	0.262	0.275	0.255	0.315	0.318	0.332	0.317	0.265	0.289	0.289	0.274	0.255	0.224	0.248	0.234		117.25	0.12	0.096	0.108	0.118	0.165	0.152	0.141	0.17	0.152	0.166	0.159	0.196	0.533	0.463	0.528	0.415
117.5	0.267	0.262	0.273	0.255	0.317	0.318	0.333	0.318	0.264	0.286	0.288	0.274	0.256	0.222	0.248	0.235		117.5	0.122	0.098	0.108	0.118	0.169	0.152	0.143	0.171	0.153	0.168	0.161	0.196	0.537	0.467	0.533	0.416
117.75	0.27	0.263	0.274	0.258	0.321	0.32	0.335	0.32	0.265	0.287	0.289	0.278	0.256	0.224	0.244	0.238		117.75	0.121	0.097	0.107	0.117	0.17	0.154	0.141	0.171	0.152	0.167	0.161	0.196	0.539	0.467	0.534	0.418
118	0.269	0.264	0.274	0.259	0.323	0.321	0.337	0.322	0.266	0.29	0.289	0.278	0.26	0.228	0.25	0.239		118	0.121	0.097	0.108	0.115	0.169	0.154	0.141	0.171	0.153	0.167	0.161	0.193	0.54	0.467	0.534	0.418
118.25	0.269	0.265	0.275	0.259	0.321	0.323	0.338	0.324	0.262	0.291	0.29	0.277	0.26	0.225	0.247	0.24		118.25	0.119	0.097	0.106	0.117	0.172	0.154	0.145	0.175	0.151	0.165	0.159	0.195	0.54	0.471	0.537	0.419
118.5	0.267	0.266	0.274	0.257	0.325	0.323	0.341	0.324	0.26	0.287	0.292	0.277	0.264	0.224	0.25	0.241		118.5	0.115	0.092	0.103	0.114	0.17	0.155	0.144	0.173	0.151	0.162	0.154	0.191	0.541	0.47	0.54	0.42
118.75	0.265	0.264	0.273	0.257	0.326	0.325	0.343	0.326	0.258	0.285	0.289	0.277	0.265	0.226	0.255	0.238		118.75	0.114	0.094	0.103	0.114	0.171	0.154	0.146	0.175	0.148	0.159	0.155	0.191	0.547	0.472	0.54	0.421
119	0.266	0.265	0.275	0.257	0.326	0.326	0.343	0.327	0.258	0.287	0.288	0.277	0.266	0.227	0.256	0.244		119	0.112	0.094	0.101	0.113	0.173	0.155	0.141	0.174	0.147	0.16	0.156	0.188	0.544	0.473	0.541	0.419
119.25	0.269	0.265	0.275	0.259	0.326	0.328	0.344	0.329	0.26	0.29	0.289	0.278	0.267	0.228	0.25	0.244		119.25	0.113	0.094	0.102	0.113	0.174	0.155	0.147	0.177	0.152	0.16	0.158	0.191	0.547	0.474	0.544	0.422
119.5	0.269	0.266	0.276	0.26	0.329	0.329	0.346	0.328	0.26	0.29	0.292	0.278	0.268	0.229	0.257	0.245		119.5	0.115	0.094	0.104	0.115	0.174	0.155	0.147	0.176	0.151	0.162	0.159	0.191	0.544	0.474	0.544	0.422
119.75	0.269	0.267	0.277	0.262	0.329	0.33	0.348	0.328	0.259	0.291	0.291	0.28	0.267	0.228	0.258	0.242		119.75	0.114	0.094	0.103	0.114	0.177	0.158	0.146	0.173	0.149	0.165	0.159	0.194	0.55	0.475	0.548	0.422
120	0.27	0.27	0.279	0.262	0.331	0.331	0.349	0.331	0.261	0.292	0.292	0.282	0.27	0.229	0.258	0.245		120	0.118	0.094	0.103	0.116	0.174	0.156	0.144	0.173	0.151	0.164	0.159	0.193	0.548	0.475	0.546	0.424
120.25	0.273	0.27	0.281	0.263	0.333	0.33	0.351	0.333	0.263	0.293	0.296	0.281	0.263	0.229	0.259	0.247		120.25	0.118	0.096	0.104	0.116	0.175	0.155	0.148	0.175	0.152	0.162	0.159	0.196	0.553	0.488	0.546	0.421
120.5	0.272	0.271	0.281	0.264	0.335	0.333	0.351	0.332	0.261	0.295	0.294	0.282	0.269	0.233	0.257	0.247		120.5	0.117	0.094	0.105	0.116	0.175	0.158	0.147	0.176	0.151	0.166	0.158	0.193	0.553	0.491	0.55	0.421
120.75	0.277	0.272	0.284	0.266	0.333	0.334	0.352	0.333	0.269	0.298	0.299	0.286	0.267	0.231	0.255	0.246		120.75	0.117	0.096	0.103	0.115	0.174	0.157	0.148	0.177	0.153	0.166	0.161	0.194	0.556	0.493	0.552	0.423
121	0.278	0.273	0.285	0.266	0.335	0.335	0.353	0.335	0.27	0.298	0.3	0.289	0.26	0.231	0.253	0.249		121	0.122	0.096	0.106	0.116	0.172	0.154	0.144	0.175	0.151	0.167	0.162	0.196	0.554	0.491	0.552	0.421
121.25	0.28	0.275	0.288	0.268	0.335	0.335	0.355	0.335	0.273	0.3	0.304	0.289	0.25	0.228	0.246	0.245		121.25	0.122	0.096	0.107	0.119	0.176	0.157	0.147	0.177	0.154	0.167	0.16	0.197	0.555	0.493	0.554	0.424
121.5	0.281	0.275	0.289	0.268	0.335	0.336	0.354	0.335	0.286	0.299	0.298	0.29	0.246	0.231	0.241	0.247		121.5	0.12	0.098	0.105	0.119	0.177	0.164	0.147	0.175	0.154	0.167	0.161	0.194	0.554	0.494	0.555	0.422
121.75	0.283	0.278	0.289	0.27	0.335	0.337	0.353	0.336	0.287	0.304	0.302	0.292	0.248	0.239	0.234	0.246		121.75	0.121	0.098	0.106	0.122	0.176	0.163	0.145	0.175	0.157	0.167	0.163	0.196	0.557	0.493	0.554	0.421
122	0.282	0.276	0.29	0.27	0.334	0.336	0.354	0.337	0.287	0.302	0.302	0.291	0.242	0.24	0.238	0.245		122	0.122	0.097	0.109	0.119	0.173	0.164	0.146	0.173	0.157	0.17	0.162	0.196	0.554	0.492	0.555	0.421
122.25	0.286	0.279	0.293	0.271	0.333	0.337	0.354	0.336	0.29	0.304	0.298	0.294	0.233	0.239	0.242	0.248		122.25	0.123	0.098	0.109	0.12	0.169	0.163	0.144	0.171	0.156	0.169	0.161	0.196	0.552	0.489	0.554	0.418
122.5	0.283	0.279	0.294	0.271	0.332	0.338	0.352	0.337	0.287	0.304	0.302	0.295	0.234	0.238	0.237	0.247		122.5	0.124	0.098	0.108	0.123	0.167	0.161	0.142	0.17	0.155	0.169	0.163	0.201	0.554	0.488	0.555	0.418
122.75	0.283	0.28	0.293	0.271	0.332	0.338	0.353	0.338	0.288	0.305	0.301	0.297	0.228	0.236	0.237	0.246		122.75	0.122	0.096	0.107	0.122	0.167	0.161	0.14	0.169	0.157	0.169	0.162	0.196	0.552	0.487	0.553	0.417
123	0.287	0.28	0.297	0.274	0.333	0.338	0.355	0.339	0.292	0.307	0.306	0.299	0.226	0.248	0.242	0.246		123	0.125	0.098	0.109	0.123	0.165	0.16	0.142	0.17	0.157	0.173	0.163	0.2	0.551	0.487	0.556	0.419
123.25	0.286	0.281	0.294	0.274	0.333	0.339	0.355	0.339	0.29	0.307	0.307	0.297	0.227	0.248	0.238	0.248		123.25	0.125	0.097	0.109	0.123	0.169	0.16	0.144	0.172	0.158	0.17	0.162	0.199	0.554	0.49	0.558	0.418
123.5	0.29	0.282	0.297	0.275	0.339	0.342	0.359	0.343	0.291	0.308	0.307	0.3	0.231	0.252	0.243	0.248		123.5	0.123	0.098	0.109	0.124	0.169	0.162	0.145	0.172	0.156	0.17	0.166	0.199	0.556	0.492	0.562	0.421
123.75	0.29	0.282	0.299	0.278	0.338	0.342	0.36	0.342	0.292	0.311	0.309	0.301	0.225	0.253	0.237	0.248		123.75	0.124	0.098	0.108	0.125	0.171	0.161	0.142	0.172	0.156	0.171	0.164	0.2	0.555	0.491	0.561	0.421
124	0.289	0.282	0.297	0.275	0.339	0.344	0.361	0.345	0.301	0.309	0.31	0.298	0.229	0.253	0.25	0.252		124	0.124	0.1	0.11	0.127	0.171	0.162	0.143	0.175	0.156	0.174	0.165	0.201	0.557	0.492	0.562	0.422
124.25	0.289	0.284	0.299	0.277	0.342	0.344	0.363	0.347	0.302	0.308	0.308	0.301	0.233	0.252	0.25	0.254		124.25	0.124	0.097	0.108	0.125	0.177	0.162	0.141	0.175	0.158	0.171	0.164	0.201	0.559	0.494	0.565	0.422
124.5	0.29	0.285	0.299	0.276	0.342	0.347	0.364	0.347	0.296	0.31	0.31	0.302	0.229	0.257	0.247	0.255		124.5	0.126	0.098	0.111	0.125	0.174	0.162	0.146	0.173	0.157	0.17	0.165	0.201	0.56	0.495	0.57	0.424
124.75	0.291	0.285	0.301	0.278	0.345	0.348	0.364	0.348	0.299	0.312	0.31	0.303	0.236	0.26	0.247	0.252		124.75	0.121	0.1	0.109	0.124	0.173	0.164	0.147	0.175	0.16	0.169	0.161	0.2	0.559	0.497	0.57	0.425
125	0.29	0.285	0.3	0.277	0.346	0.349	0.367	0.35	0.301	0.31	0.309	0.302	0.233	0.257	0.249	0.251		125	0.124	0.098	0.107	0.125	0.174	0.162	0.146	0.173	0.158	0.173	0.163	0.201	0.563	0.495	0.569	0.421
125.25	0.287	0.285	0.298	0.277	0.348	0.349	0.369	0.35	0.297	0.308	0.308	0.3	0.237	0.26	0.246	0.251		125.25	0.117	0.1	0.104	0.12	0.175	0.163	0.147	0.174	0.155	0.165	0.16	0.196	0.564	0.498	0.573	0.425
125.5	0.287	0.286	0.298	0.278	0.348	0.35	0.37	0.351	0.296	0.31	0.309	0.298	0.237	0.259	0.238	0.248		125.5	0.116	0.098	0.102	0.122	0.176	0.164	0.146	0.18	0.154	0.166	0.158	0.196	0.565	0.501	0.574	0.426
125.75	0.286	0.285	0.298	0.278	0.351	0.352	0.371	0.353	0.29	0.31	0.309	0.298	0.236	0.256	0.245	0.24		125.75	0.114	0.097	0.1	0.116	0.175	0.164	0.145	0.18	0.151	0.162	0.155	0.189	0.564	0.5	0.575	0.423
126	0.285	0.284	0.296	0.277	0.351	0.354	0.373	0.354	0.293	0.31	0.308	0.299	0.234	0.257	0.244	0.238		126	0.112	0.096	0.098	0.116	0.177	0.162	0.146	0.183	0.152	0.162	0.157	0.193	0.567	0.502	0.577	0.425
126.25	0.288	0.286	0.298	0.279	0.352	0.355	0.376	0.356	0.294	0.311	0.309	0.3	0.238	0.255	0.246	0.24		126.25	0.11	0.096	0.099	0.116	0.177	0.163	0.149	0.183	0.151	0.159	0.156	0.19	0.568	0.502	0.578	0.425
126.5	0.286	0.288	0.299	0.279	0.353	0.353	0.375	0.356	0.293	0.312	0.311	0.301	0.237	0.247	0.249	0.238		126.5	0.114	0.095	0.1	0.119	0.179	0.163	0.148	0.18	0.152	0.161	0.157	0.192	0.568	0.501	0.581	0.427
126.75	0.291	0.289	0.301	0.281	0.353	0.356	0.376	0.357	0.289	0.312	0.314	0.304	0.238	0.253	0.25	0.235		126.75	0.115	0.097	0.102	0.121	0.18	0.164	0.149	0.181	0.156	0.165	0.158	0.193	0.571	0.502	0.581	0.425
127	0.291	0.29	0.302	0.283	0.355	0.357	0.377	0.358	0.304	0.315	0.313	0.304	0.238	0.252	0.25	0.248		127	0.118	0.098	0.102	0.121	0.176	0.162	0.147	0.182	0.155	0.163	0.159	0.195	0.57	0.503	0.581	0.426
127.25	0.292	0.292	0.307	0.282	0.356	0.359	0.378	0.359	0.309	0.316	0.317	0.304	0.239	0.251	0.252	0.244		127.25	0.117	0.097	0.102	0.12	0.178	0.167	0.148	0.182	0.156	0.167	0.159	0.194	0.57	0.502	0.583	0.424
127.5	0.295	0.292	0.307	0.285	0.355	0.358	0.377	0.359	0.311	0.317	0.319	0.307	0.235	0.254	0.252	0.24		127.5	0.119	0.099	0.104	0.122	0.182	0.162	0.146	0.182	0.157	0.166	0.163	0.197	0.572	0.504	0.587	0.427
127.75	0.297	0.294	0.309	0.286	0.357	0.361	0.38	0.361	0.309	0.321	0.318	0.307	0.237	0.249	0.256	0.237		127.75	0.118	0.099	0.107	0.123	0.177	0.163	0.148	0.182	0.157	0.169	0.16	0.197	0.57	0.504	0.586	0.426
128	0.298	0.296	0.311	0.287	0.352	0.358	0.377	0.359	0.313	0.319	0.321	0.307	0.23	0.257	0.255	0.236		128	0.121	0.1	0.108	0.123	0.174	0.162	0.145	0.178	0.158	0.169	0.162	0.2	0.57	0.5	0.587	0.421
128.25	0.3	0.295	0.312	0.288	0.352	0.358	0.376	0.36	0.315	0.322	0.32	0.309	0.232	0.257	0.246	0.238		128.25	0.121	0.101	0.108	0.122	0.172	0.162	0.143	0.179	0.158	0.169	0.163	0.201	0.567	0.497	0.586	0.42
128.5	0.3	0.297	0.314	0.289	0.35	0.36	0.377	0.36	0.315	0.322	0.327	0.31	0.226	0.256	0.244	0.236		128.5	0.12	0.103	0.106	0.125	0.172	0.159	0.144	0.177	0.161	0.173	0.162	0.199	0.567	0.497	0.586	0.417
128.75	0.302	0.3	0.314	0.291	0.352	0.36	0.376	0.36	0.318	0.326	0.327	0.308	0.248	0.249	0.245	0.235		128.75	0.12	0.1	0.109	0.125	0.165	0.159	0.138	0.176	0.16	0.169	0.161	0.201	0.566	0.497	0.586	0.417
129	0.3	0.298	0.315	0.29	0.352	0.361	0.377	0.363	0.307	0.325	0.327	0.312	0.246	0.246	0.244	0.234		129	0.123	0.103	0.106	0.124	0.168	0.158	0.139	0.175	0.157	0.17	0.161	0.2	0.566	0.497	0.588	0.417
129.25	0.304	0.3	0.316	0.292	0.355	0.362	0.38	0.364	0.314	0.326	0.33	0.315	0.246	0.252	0.249	0.233		129.25	0.124	0.101	0.106	0.124	0.17	0.159	0.145	0.178	0.161	0.174	0.164	0.201	0.568	0.498	0.591	0.417
129.5	0.304	0.301	0.317	0.293	0.357	0.364	0.381	0.365	0.308	0.329	0.33	0.315	0.242	0.249	0.243	0.234		129.5	0.124	0.102	0.109	0.128	0.171	0.16	0.144	0.177	0.159	0.174	0.162	0.2	0.57	0.499	0.592	0.418
129.75	0.305	0.301	0.318	0.292	0.36	0.364	0.385	0.368	0.314	0.329	0.331	0.312	0.242	0.253	0.248	0.235		129.75	0.124	0.101	0.11	0.128	0.171	0.162	0.143	0.18	0.16	0.175	0.164	0.201	0.571	0.499	0.596	0.419
130	0.308	0.304	0.319	0.297	0.36	0.367	0.385	0.368	0.317	0.33	0.334	0.315	0.242	0.252	0.243	0.236		130	0.125	0.103	0.109	0.128	0.175	0.162	0.145	0.178	0.162	0.174	0.164	0.203	0.573	0.502	0.598	0.421
130.25	0.308	0.305	0.321	0.296	0.36	0.368	0.387	0.37	0.314	0.328	0.331	0.317	0.24	0.243	0.237	0.246		130.25	0.123	0.103	0.108	0.126	0.173	0.161	0.144	0.183	0.159	0.175	0.162	0.2	0.574	0.503	0.6	0.422
130.5	0.309	0.303	0.323	0.296	0.364	0.37	0.388	0.37	0.309	0.333	0.334	0.317	0.237	0.245	0.24	0.246		130.5	0.123	0.104	0.108	0.126	0.176	0.164	0.148	0.185	0.162	0.174	0.165	0.2	0.575	0.505	0.6	0.422
130.75	0.307	0.306	0.321	0.297	0.365	0.371	0.39	0.373	0.318	0.333	0.335	0.317	0.238	0.248	0.25	0.248		130.75	0.125	0.101	0.108	0.124	0.176	0.165	0.148	0.181	0.16	0.173	0.164	0.198	0.577	0.506	0.603	0.422
131	0.309	0.306	0.321	0.296	0.366	0.372	0.393	0.373	0.327	0.33	0.331	0.315	0.242	0.247	0.247	0.246		131	0.124	0.103	0.11	0.125	0.179	0.163	0.149	0.181	0.162	0.175	0.163	0.202	0.58	0.508	0.606	0.425
131.25	0.305	0.304	0.32	0.298	0.37	0.373	0.394	0.374	0.323	0.329	0.333	0.314	0.244	0.25	0.257	0.251		131.25	0.12	0.1	0.105	0.123	0.177	0.164	0.147	0.18	0.158	0.168	0.161	0.198	0.577	0.507	0.605	0.423
131.5	0.304	0.305	0.32	0.298	0.37	0.374	0.395	0.376	0.318	0.329	0.332	0.31	0.244	0.247	0.252	0.252		131.5	0.115	0.099	0.103	0.122	0.181	0.166	0.151	0.186	0.156	0.168	0.161	0.193	0.582	0.51	0.61	0.426
131.75	0.303	0.304	0.32	0.297	0.371	0.376	0.396	0.377	0.318	0.329	0.335	0.312	0.241	0.245	0.241	0.25		131.75	0.111	0.098	0.101	0.121	0.18	0.169	0.148	0.183	0.155	0.165	0.159	0.192	0.583	0.511	0.61	0.425
132	0.304	0.306	0.32	0.296	0.37	0.375	0.398	0.377	0.317	0.328	0.334	0.312	0.24	0.244	0.247	0.249		132	0.11	0.096	0.1	0.118	0.177	0.168	0.147	0.183	0.155	0.165	0.156	0.193	0.583	0.508	0.61	0.422
132.25	0.303	0.306	0.32	0.299	0.372	0.377	0.397	0.379	0.32	0.331	0.332	0.314	0.266	0.243	0.239	0.247		132.25	0.114	0.1	0.102	0.119	0.181	0.168	0.149	0.186	0.155	0.167	0.159	0.195	0.585	0.51	0.614	0.425
132.5	0.307	0.308	0.323	0.3	0.376	0.379	0.402	0.38	0.323	0.331	0.337	0.317	0.27	0.243	0.246	0.249		132.5	0.117	0.099	0.104	0.122	0.178	0.167	0.147	0.184	0.155	0.168	0.158	0.196	0.582	0.508	0.615	0.422
132.75	0.307	0.308	0.324	0.3	0.375	0.381	0.4	0.381	0.313	0.333	0.339	0.316	0.29	0.242	0.252	0.247		132.75	0.116	0.1	0.102	0.123	0.184	0.169	0.15	0.187	0.158	0.17	0.16	0.197	0.585	0.512	0.619	0.428
133	0.311	0.311	0.327	0.301	0.376	0.382	0.401	0.382	0.324	0.337	0.32	0.32	0.281	0.246	0.251	0.25		133	0.119	0.102	0.106	0.123	0.179	0.167	0.147	0.184	0.157	0.172	0.162	0.203	0.583	0.511	0.614	0.434
133.25	0.312	0.311	0.328	0.305	0.375	0.381	0.402	0.383	0.322	0.336	0.32	0.318	0.273	0.246	0.257	0.25		133.25	0.119	0.101	0.104	0.123	0.182	0.167	0.148	0.183	0.159	0.173	0.161	0.204	0.585	0.51	0.617	0.435
133.5	0.314	0.313	0.33	0.304	0.376	0.381	0.402	0.385	0.322	0.34	0.311	0.319	0.278	0.248	0.253	0.247		133.5	0.121	0.099	0.107	0.126	0.18	0.166	0.149	0.184	0.159	0.173	0.164	0.205	0.585	0.511	0.619	0.432
133.75	0.316	0.316	0.33	0.306	0.373	0.383	0.401	0.384	0.319	0.341	0.301	0.32	0.268	0.244	0.248	0.246		133.75	0.122	0.102	0.109	0.125	0.178	0.164	0.145	0.182	0.159	0.173	0.165	0.2	0.584	0.509	0.617	0.432
134	0.315	0.315	0.333	0.308	0.372	0.381	0.402	0.386	0.311	0.342	0.284	0.321	0.256	0.248	0.25	0.244		134	0.119	0.102	0.106	0.124	0.173	0.162	0.142	0.18	0.159	0.171	0.163	0.206	0.582	0.505	0.618	0.429
134.25	0.318	0.316	0.334	0.308	0.374	0.383	0.401	0.387	0.31	0.343	0.277	0.32	0.251	0.245	0.251	0.243		134.25	0.121	0.102	0.107	0.128	0.169	0.162	0.14	0.177	0.159	0.174	0.165	0.206	0.58	0.502	0.616	0.426
134.5	0.318	0.318	0.335	0.31	0.372	0.383	0.402	0.386	0.303	0.346	0.273	0.319	0.246	0.245	0.252	0.245		134.5	0.123	0.101	0.107	0.126	0.17	0.161	0.138	0.177	0.16	0.175	0.166	0.205	0.582	0.504	0.619	0.426
134.75	0.32	0.318	0.335	0.31	0.373	0.384	0.402	0.388	0.303	0.344	0.264	0.32	0.243	0.241	0.246	0.244		134.75	0.123	0.103	0.11	0.126	0.168	0.161	0.141	0.179	0.161	0.174	0.165	0.205	0.582	0.505	0.622	0.426
135	0.322	0.319	0.337	0.312	0.375	0.385	0.403	0.39	0.303	0.348	0.264	0.323	0.246	0.249	0.248	0.242		135	0.123	0.102	0.11	0.128	0.17	0.162	0.141	0.178	0.16	0.175	0.169	0.207	0.58	0.505	0.621	0.424
135.25	0.324	0.321	0.34	0.313	0.377	0.388	0.407	0.391	0.303	0.348	0.258	0.325	0.241	0.25	0.252	0.246		135.25	0.123	0.101	0.111	0.126	0.173	0.162	0.146	0.179	0.165	0.176	0.166	0.204	0.582	0.507	0.626	0.427
135.5	0.325	0.321	0.341	0.313	0.38	0.39	0.409	0.394	0.3	0.349	0.309	0.323	0.249	0.246	0.255	0.242		135.5	0.124	0.102	0.108	0.127	0.175	0.163	0.142	0.18	0.164	0.174	0.166	0.205	0.588	0.507	0.628	0.426
135.75	0.326	0.322	0.342	0.313	0.382	0.391	0.41	0.395	0.301	0.351	0.298	0.326	0.249	0.252	0.25	0.241		135.75	0.123	0.104	0.109	0.125	0.178	0.164	0.145	0.18	0.163	0.175	0.167	0.209	0.589	0.51	0.63	0.428
136	0.327	0.324	0.343	0.314	0.383	0.393	0.415	0.395	0.305	0.352	0.291	0.331	0.246	0.25	0.251	0.248		136	0.124	0.103	0.11	0.127	0.178	0.164	0.147	0.181	0.164	0.178	0.166	0.207	0.59	0.513	0.635	0.432
136.25	0.327	0.325	0.343	0.316	0.386	0.393	0.413	0.398	0.305	0.351	0.283	0.331	0.244	0.251	0.243	0.244		136.25	0.125	0.102	0.109	0.127	0.179	0.165	0.146	0.183	0.165	0.177	0.167	0.208	0.592	0.512	0.638	0.43
136.5	0.326	0.325	0.345	0.317	0.387	0.395	0.415	0.398	0.301	0.354	0.271	0.331	0.244	0.253	0.25	0.247		136.5	0.124	0.105	0.108	0.127	0.178	0.165	0.148	0.184	0.162	0.176	0.167	0.206	0.594	0.515	0.637	0.432
136.75	0.327	0.326	0.345	0.318	0.388	0.398	0.419	0.401	0.301	0.349	0.306	0.334	0.249	0.261	0.255	0.245		136.75	0.123	0.105	0.11	0.125	0.18	0.166	0.148	0.184	0.162	0.179	0.166	0.209	0.593	0.514	0.64	0.429
137	0.329	0.326	0.345	0.318	0.391	0.398	0.418	0.403	0.302	0.353	0.299	0.335	0.243	0.265	0.264	0.246		137	0.122	0.105	0.108	0.127	0.18	0.167	0.149	0.185	0.163	0.178	0.167	0.209	0.596	0.517	0.644	0.433
137.25	0.327	0.326	0.345	0.319	0.389	0.399	0.42	0.403	0.302	0.353	0.29	0.333	0.24	0.26	0.254	0.248		137.25	0.121	0.107	0.109	0.127	0.18	0.166	0.146	0.186	0.162	0.176	0.165	0.205	0.595	0.515	0.644	0.43
137.5	0.329	0.328	0.348	0.319	0.393	0.402	0.423	0.405	0.302	0.356	0.289	0.335	0.242	0.269	0.268	0.245		137.5	0.123	0.103	0.107	0.125	0.182	0.168	0.147	0.187	0.16	0.176	0.164	0.207	0.598	0.517	0.649	0.433
137.75	0.329	0.329	0.347	0.32	0.395	0.402	0.426	0.406	0.297	0.354	0.28	0.334	0.243	0.266	0.271	0.25		137.75	0.119	0.103	0.108	0.123	0.181	0.169	0.147	0.185	0.16	0.172	0.164	0.204	0.599	0.515	0.649	0.432
138	0.328	0.329	0.348	0.32	0.396	0.402	0.428	0.407	0.295	0.353	0.273	0.333	0.249	0.27	0.277	0.259		138	0.122	0.103	0.105	0.124	0.182	0.169	0.15	0.186	0.161	0.173	0.166	0.205	0.599	0.519	0.65	0.437
138.25	0.33	0.329	0.349	0.322	0.397	0.405	0.427	0.406	0.299	0.358	0.272	0.336	0.249	0.269	0.277	0.257		138.25	0.12	0.102	0.107	0.126	0.184	0.166	0.151	0.188	0.161	0.171	0.165	0.204	0.601	0.519	0.653	0.437
138.5	0.33	0.331	0.35	0.323	0.399	0.405	0.429	0.408	0.314	0.357	0.267	0.334	0.246	0.266	0.281	0.252		138.5	0.121	0.103	0.104	0.125	0.182	0.167	0.15	0.185	0.16	0.173	0.165	0.207	0.598	0.518	0.652	0.436
138.75	0.332	0.331	0.351	0.325	0.401	0.406	0.43	0.41	0.312	0.358	0.274	0.338	0.246	0.271	0.279	0.249		138.75	0.118	0.104	0.106	0.126	0.182	0.168	0.151	0.187	0.16	0.176	0.167	0.205	0.602	0.519	0.654	0.436
139	0.329	0.331	0.349	0.322	0.399	0.407	0.432	0.411	0.315	0.356	0.272	0.336	0.243	0.265	0.284	0.25		139	0.122	0.103	0.106	0.124	0.183	0.167	0.149	0.188	0.162	0.176	0.166	0.207	0.601	0.517	0.656	0.435
139.25	0.333	0.333	0.352	0.324	0.396	0.406	0.43	0.411	0.317	0.359	0.273	0.34	0.237	0.266	0.277	0.242		139.25	0.121	0.101	0.107	0.123	0.181	0.167	0.15	0.184	0.159	0.175	0.165	0.207	0.599	0.516	0.657	0.433
139.5	0.333	0.335	0.355	0.326	0.392	0.407	0.428	0.411	0.315	0.36	0.277	0.334	0.24	0.267	0.278	0.244		139.5	0.121	0.104	0.108	0.128	0.177	0.166	0.154	0.183	0.162	0.175	0.166	0.208	0.598	0.514	0.657	0.431
139.75	0.336	0.336	0.357	0.329	0.392	0.407	0.428	0.411	0.319	0.362	0.276	0.341	0.238	0.263	0.278	0.247		139.75	0.119	0.103	0.107	0.125	0.175	0.163	0.155	0.18	0.162	0.173	0.166	0.208	0.597	0.511	0.657	0.43
140	0.337	0.337	0.359	0.33	0.393	0.409	0.427	0.413	0.319	0.365	0.282	0.343	0.237	0.267	0.274	0.243		140	0.119	0.103	0.106	0.125	0.172	0.164	0.149	0.18	0.163	0.175	0.167	0.208	0.596	0.51	0.653	0.426
140.25	0.338	0.338	0.359	0.329	0.396	0.41	0.429	0.414	0.321	0.364	0.281	0.339	0.238	0.259	0.276	0.24		140.25	0.121	0.105	0.106	0.126	0.174	0.164	0.15	0.181	0.162	0.178	0.167	0.207	0.597	0.512	0.658	0.428
140.5	0.338	0.339	0.361	0.33	0.393	0.41	0.427	0.414	0.321	0.366	0.283	0.334	0.235	0.263	0.273	0.242		140.5	0.121	0.104	0.106	0.125	0.169	0.163	0.148	0.183	0.163	0.178	0.167	0.209	0.596	0.508	0.658	0.428
140.75	0.34	0.341	0.362	0.333	0.396	0.411	0.429	0.416	0.323	0.367	0.284	0.342	0.236	0.261	0.269	0.243		140.75	0.121	0.103	0.107	0.125	0.171	0.162	0.146	0.179	0.163	0.176	0.168	0.207	0.596	0.505	0.659	0.426
141	0.339	0.341	0.362	0.333	0.398	0.413	0.433	0.418	0.326	0.37	0.285	0.344	0.241	0.261	0.274	0.245		141	0.122	0.106	0.104	0.123	0.171	0.163	0.149	0.178	0.165	0.178	0.166	0.205	0.598	0.509	0.662	0.426
141.25	0.341	0.34	0.362	0.335	0.399	0.413	0.434	0.421	0.335	0.369	0.285	0.341	0.235	0.264	0.277	0.247		141.25	0.122	0.105	0.108	0.127	0.175	0.165	0.152	0.184	0.163	0.177	0.169	0.211	0.601	0.517	0.668	0.433
141.5	0.342	0.341	0.366	0.336	0.403	0.415	0.437	0.423	0.338	0.369	0.288	0.338	0.241	0.264	0.279	0.244		141.5	0.125	0.105	0.109	0.126	0.176	0.166	0.153	0.183	0.165	0.179	0.17	0.207	0.604	0.515	0.67	0.431
141.75	0.343	0.342	0.365	0.336	0.403	0.415	0.438	0.425	0.342	0.373	0.289	0.342	0.244	0.265	0.275	0.244		141.75	0.124	0.104	0.11	0.128	0.18	0.166	0.155	0.185	0.165	0.181	0.171	0.21	0.604	0.519	0.672	0.433
142	0.345	0.343	0.368	0.337	0.404	0.416	0.44	0.425	0.341	0.374	0.288	0.343	0.244	0.267	0.272	0.244		142	0.122	0.107	0.108	0.126	0.181	0.166	0.155	0.184	0.162	0.18	0.169	0.21	0.605	0.52	0.674	0.434
142.25	0.345	0.345	0.368	0.338	0.409	0.418	0.442	0.428	0.342	0.371	0.29	0.346	0.248	0.27	0.273	0.25		142.25	0.123	0.106	0.108	0.128	0.178	0.17	0.157	0.185	0.166	0.179	0.167	0.211	0.608	0.52	0.676	0.432
142.5	0.346	0.347	0.371	0.338	0.407	0.42	0.444	0.43	0.339	0.374	0.292	0.343	0.248	0.265	0.272	0.249		142.5	0.124	0.106	0.108	0.125	0.179	0.168	0.155	0.185	0.165	0.179	0.169	0.211	0.609	0.52	0.679	0.434
142.75	0.345	0.346	0.369	0.339	0.412	0.422	0.445	0.431	0.338	0.376	0.29	0.342	0.25	0.27	0.27	0.247		142.75	0.125	0.106	0.108	0.128	0.182	0.171	0.156	0.188	0.165	0.181	0.169	0.209	0.609	0.521	0.681	0.435
143	0.346	0.346	0.371	0.34	0.412	0.424	0.45	0.433	0.331	0.375	0.293	0.345	0.251	0.265	0.271	0.25		143	0.124	0.106	0.109	0.13	0.181	0.171	0.154	0.185	0.164	0.181	0.172	0.208	0.609	0.523	0.683	0.437
143.25	0.349	0.347	0.373	0.34	0.415	0.424	0.452	0.434	0.332	0.377	0.294	0.35	0.25	0.272	0.278	0.25		143.25	0.123	0.104	0.106	0.128	0.183	0.172	0.156	0.188	0.165	0.177	0.169	0.207	0.613	0.523	0.686	0.437
143.5	0.348	0.349	0.374	0.342	0.415	0.426	0.455	0.435	0.328	0.379	0.293	0.352	0.253	0.273	0.268	0.252		143.5	0.121	0.105	0.107	0.126	0.185	0.171	0.158	0.187	0.17	0.18	0.167	0.209	0.613	0.523	0.688	0.435
143.75	0.349	0.35	0.373	0.344	0.416	0.427	0.456	0.431	0.329	0.378	0.295	0.367	0.249	0.273	0.274	0.253		143.75	0.125	0.105	0.11	0.128	0.183	0.171	0.159	0.188	0.172	0.182	0.171	0.209	0.614	0.524	0.692	0.439
144	0.347	0.35	0.373	0.343	0.419	0.429	0.457	0.438	0.328	0.378	0.296	0.366	0.251	0.271	0.273	0.251		144	0.123	0.104	0.108	0.126	0.183	0.172	0.159	0.19	0.17	0.18	0.168	0.211	0.613	0.52	0.693	0.439
144.25	0.351	0.351	0.377	0.344	0.418	0.429	0.459	0.439	0.32	0.381	0.296	0.369	0.251	0.273	0.27	0.251		144.25	0.126	0.107	0.108	0.13	0.183	0.172	0.159	0.19	0.171	0.182	0.171	0.213	0.618	0.525	0.697	0.441
144.5	0.352	0.352	0.378	0.347	0.421	0.431	0.462	0.441	0.328	0.383	0.296	0.37	0.256	0.275	0.279	0.251		144.5	0.123	0.108	0.108	0.131	0.183	0.171	0.157	0.19	0.171	0.179	0.172	0.21	0.618	0.522	0.7	0.443
144.75	0.353	0.354	0.378	0.347	0.422	0.429	0.462	0.44	0.328	0.382	0.298	0.371	0.251	0.297	0.279	0.246		144.75	0.126	0.108	0.109	0.129	0.184	0.171	0.157	0.192	0.175	0.182	0.17	0.212	0.617	0.522	0.699	0.443
145	0.35	0.354	0.379	0.347	0.42	0.433	0.462	0.443	0.316	0.381	0.297	0.37	0.253	0.298	0.277	0.252		145	0.124	0.108	0.11	0.126	0.185	0.172	0.161	0.193	0.173	0.182	0.169	0.211	0.619	0.525	0.703	0.445
145.25	0.353	0.356	0.379	0.349	0.423	0.433	0.462	0.443	0.325	0.385	0.298	0.371	0.255	0.297	0.279	0.264		145.25	0.125	0.105	0.11	0.13	0.181	0.171	0.157	0.192	0.172	0.184	0.168	0.215	0.618	0.525	0.704	0.441
145.5	0.356	0.355	0.38	0.35	0.422	0.432	0.463	0.445	0.326	0.388	0.301	0.372	0.256	0.299	0.275	0.264		145.5	0.123	0.104	0.11	0.126	0.183	0.168	0.155	0.189	0.171	0.182	0.171	0.21	0.618	0.525	0.706	0.441
145.75	0.355	0.355	0.38	0.349	0.42	0.434	0.461	0.442	0.325	0.388	0.301	0.374	0.254	0.298	0.275	0.262		145.75	0.125	0.108	0.109	0.129	0.18	0.171	0.156	0.188	0.173	0.183	0.17	0.214	0.618	0.523	0.706	0.441
146	0.357	0.358	0.384	0.35	0.42	0.434	0.459	0.443	0.324	0.39	0.302	0.375	0.248	0.297	0.275	0.261		146	0.125	0.108	0.111	0.132	0.179	0.169	0.152	0.184	0.174	0.183	0.172	0.213	0.616	0.521	0.706	0.437
146.25	0.36	0.359	0.387	0.351	0.42	0.434	0.461	0.444	0.334	0.39	0.306	0.377	0.249	0.296	0.271	0.257		146.25	0.121	0.105	0.108	0.129	0.176	0.168	0.152	0.183	0.172	0.185	0.171	0.213	0.616	0.519	0.707	0.437
146.5	0.359	0.36	0.388	0.353	0.418	0.433	0.459	0.444	0.356	0.39	0.304	0.38	0.243	0.295	0.267	0.253		146.5	0.122	0.108	0.11	0.129	0.175	0.166	0.151	0.186	0.173	0.185	0.17	0.212	0.615	0.519	0.709	0.437
146.75	0.361	0.359	0.387	0.353	0.419	0.436	0.461	0.445	0.356	0.391	0.305	0.377	0.241	0.296	0.272	0.253		146.75	0.125	0.106	0.11	0.13	0.173	0.168	0.15	0.185	0.173	0.184	0.17	0.215	0.614	0.516	0.709	0.435
147	0.359	0.36	0.387	0.353	0.421	0.438	0.461	0.448	0.355	0.39	0.304	0.378	0.243	0.297	0.277	0.252		147	0.125	0.108	0.109	0.129	0.171	0.168	0.149	0.184	0.175	0.182	0.171	0.213	0.614	0.516	0.712	0.436
147.25	0.36	0.361	0.387	0.354	0.422	0.438	0.462	0.445	0.356	0.392	0.306	0.378	0.246	0.3	0.275	0.247		147.25	0.125	0.109	0.111	0.128	0.176	0.168	0.15	0.185	0.174	0.182	0.172	0.215	0.616	0.517	0.716	0.437
147.5	0.363	0.361	0.389	0.355	0.426	0.442	0.466	0.45	0.357	0.394	0.307	0.381	0.249	0.3	0.279	0.256		147.5	0.126	0.105	0.11	0.127	0.176	0.168	0.153	0.186	0.174	0.182	0.169	0.212	0.62	0.521	0.72	0.438
147.75	0.361	0.365	0.391	0.355	0.427	0.443	0.469	0.45	0.353	0.392	0.307	0.381	0.248	0.296	0.278	0.253		147.75	0.127	0.107	0.11	0.132	0.176	0.169	0.153	0.185	0.174	0.182	0.171	0.215	0.622	0.52	0.721	0.438
148	0.364	0.365	0.393	0.358	0.429	0.444	0.47	0.453	0.361	0.398	0.31	0.383	0.251	0.299	0.275	0.257		148	0.123	0.106	0.11	0.127	0.182	0.17	0.156	0.188	0.173	0.183	0.169	0.212	0.625	0.525	0.727	0.441
148.25	0.365	0.366	0.393	0.359	0.429	0.445	0.472	0.455	0.36	0.399	0.31	0.384	0.249	0.299	0.278	0.257		148.25	0.127	0.106	0.11	0.129	0.18	0.172	0.155	0.19	0.171	0.183	0.171	0.213	0.626	0.526	0.729	0.44
148.5	0.364	0.366	0.393	0.359	0.43	0.445	0.472	0.457	0.358	0.398	0.311	0.384	0.253	0.304	0.277	0.256		148.5	0.127	0.107	0.11	0.13	0.178	0.173	0.156	0.191	0.175	0.182	0.172	0.211	0.627	0.523	0.731	0.442
148.75	0.366	0.368	0.393	0.36	0.434	0.45	0.478	0.457	0.358	0.399	0.311	0.387	0.253	0.297	0.273	0.258		148.75	0.125	0.106	0.109	0.131	0.182	0.173	0.156	0.19	0.174	0.183	0.171	0.213	0.627	0.526	0.734	0.445
149	0.364	0.368	0.395	0.36	0.434	0.45	0.477	0.459	0.357	0.4	0.31	0.386	0.255	0.298	0.27	0.258		149	0.119	0.105	0.107	0.128	0.185	0.17	0.154	0.189	0.17	0.18	0.168	0.208	0.627	0.525	0.737	0.442
149.25	0.367	0.368	0.395	0.36	0.437	0.455	0.479	0.462	0.357	0.4	0.314	0.388	0.253	0.299	0.278	0.256		149.25	0.123	0.105	0.107	0.126	0.185	0.171	0.159	0.193	0.171	0.181	0.17	0.213	0.631	0.528	0.742	0.446
149.5	0.365	0.368	0.396	0.362	0.44	0.457	0.481	0.463	0.354	0.402	0.314	0.388	0.251	0.299	0.273	0.257		149.5	0.122	0.104	0.107	0.126	0.182	0.172	0.157	0.191	0.171	0.178	0.169	0.21	0.629	0.527	0.742	0.445
149.75	0.365	0.369	0.398	0.362	0.439	0.457	0.483	0.462	0.353	0.4	0.314	0.388	0.255	0.303	0.28	0.262		149.75	0.122	0.106	0.106	0.128	0.185	0.172	0.156	0.193	0.17	0.18	0.168	0.211	0.632	0.529	0.747	0.443
150	0.369	0.372	0.399	0.363	0.442	0.459	0.483	0.464	0.358	0.4	0.315	0.388	0.258	0.301	0.279	0.261		150	0.121	0.104	0.109	0.126	0.184	0.174	0.16	0.192	0.172	0.179	0.17	0.214	0.635	0.529	0.75	0.445
150.25	0.366	0.37	0.4	0.365	0.442	0.46	0.486	0.466	0.357	0.405	0.315	0.39	0.257	0.302	0.284	0.262		150.25	0.124	0.106	0.109	0.129	0.186	0.173	0.158	0.194	0.172	0.183	0.171	0.212	0.634	0.532	0.752	0.447
150.5	0.368	0.373	0.401	0.365	0.444	0.459	0.488	0.468	0.362	0.405	0.317	0.392	0.257	0.302	0.276	0.261		150.5	0.119	0.106	0.109	0.128	0.187	0.175	0.159	0.194	0.172	0.18	0.169	0.213	0.634	0.533	0.755	0.449
150.75	0.369	0.374	0.402	0.366	0.444	0.461	0.488	0.468	0.362	0.405	0.317	0.387	0.259	0.304	0.28	0.261		150.75	0.125	0.108	0.113	0.129	0.187	0.176	0.159	0.194	0.171	0.185	0.171	0.213	0.639	0.534	0.757	0.448
151	0.37	0.374	0.402	0.367	0.447	0.462	0.49	0.469	0.354	0.405	0.318	0.391	0.262	0.301	0.285	0.261		151	0.122	0.104	0.11	0.128	0.19	0.173	0.158	0.192	0.172	0.179	0.17	0.21	0.639	0.532	0.76	0.447
151.25	0.372	0.375	0.405	0.369	0.446	0.463	0.486	0.469	0.362	0.406	0.321	0.392	0.258	0.294	0.28	0.26		151.25	0.125	0.108	0.115	0.129	0.19	0.175	0.158	0.195	0.179	0.184	0.17	0.214	0.639	0.533	0.764	0.449
151.5	0.372	0.377	0.407	0.37	0.447	0.463	0.491	0.469	0.36	0.408	0.322	0.392	0.256	0.298	0.318	0.264		151.5	0.125	0.11	0.112	0.132	0.189	0.171	0.158	0.191	0.172	0.184	0.17	0.214	0.636	0.53	0.764	0.448
151.75	0.372	0.377	0.407	0.371	0.444	0.465	0.49	0.468	0.351	0.408	0.321	0.393	0.254	0.31	0.31	0.285		151.75	0.125	0.107	0.114	0.13	0.186	0.172	0.158	0.19	0.175	0.182	0.172	0.215	0.637	0.531	0.765	0.447
152	0.374	0.379	0.408	0.372	0.444	0.462	0.484	0.47	0.36	0.41	0.323	0.392	0.25	0.309	0.303	0.279		152	0.125	0.105	0.113	0.128	0.182	0.171	0.154	0.188	0.175	0.184	0.171	0.211	0.634	0.528	0.764	0.442
152.25	0.375	0.38	0.408	0.372	0.443	0.463	0.488	0.469	0.359	0.412	0.325	0.387	0.249	0.308	0.3	0.275		152.25	0.125	0.107	0.116	0.131	0.183	0.169	0.154	0.189	0.175	0.183	0.172	0.213	0.636	0.529	0.765	0.442
152.5	0.377	0.38	0.409	0.373	0.443	0.465	0.489	0.471	0.359	0.413	0.324	0.394	0.248	0.309	0.303	0.271		152.5	0.127	0.109	0.116	0.13	0.179	0.17	0.153	0.186	0.175	0.186	0.173	0.218	0.635	0.527	0.766	0.441
152.75	0.376	0.38	0.409	0.375	0.44	0.463	0.488	0.471	0.36	0.415	0.326	0.392	0.243	0.305	0.292	0.269		152.75	0.126	0.108	0.114	0.133	0.178	0.17	0.152	0.185	0.175	0.186	0.172	0.214	0.634	0.525	0.77	0.441
153	0.378	0.382	0.413	0.374	0.445	0.464	0.49	0.471	0.361	0.416	0.327	0.391	0.249	0.31	0.287	0.272		153	0.125	0.109	0.115	0.131	0.179	0.169	0.151	0.186	0.176	0.184	0.175	0.216	0.634	0.523	0.77	0.44
153.25	0.381	0.384	0.413	0.375	0.446	0.466	0.491	0.475	0.362	0.417	0.328	0.389	0.249	0.307	0.286	0.27		153.25	0.128	0.107	0.114	0.131	0.183	0.169	0.152	0.186	0.175	0.186	0.173	0.218	0.638	0.527	0.776	0.442
153.5	0.382	0.385	0.415	0.378	0.447	0.462	0.495	0.477	0.363	0.418	0.33	0.388	0.251	0.309	0.287	0.266		153.5	0.125	0.109	0.115	0.13	0.181	0.168	0.156	0.19	0.176	0.183	0.173	0.217	0.641	0.529	0.777	0.444
153.75	0.382	0.385	0.416	0.378	0.452	0.464	0.5	0.477	0.36	0.42	0.331	0.39	0.256	0.312	0.294	0.273		153.75	0.126	0.11	0.113	0.13	0.184	0.168	0.156	0.19	0.178	0.186	0.175	0.215	0.641	0.529	0.783	0.444
154	0.384	0.384	0.417	0.379	0.453	0.47	0.5	0.481	0.36	0.419	0.333	0.392	0.255	0.312	0.29	0.273		154	0.128	0.107	0.116	0.13	0.186	0.173	0.156	0.194	0.178	0.187	0.177	0.216	0.643	0.532	0.785	0.447
154.25	0.386	0.386	0.419	0.379	0.453	0.468	0.503	0.481	0.356	0.419	0.333	0.395	0.263	0.314	0.288	0.27		154.25	0.126	0.107	0.116	0.135	0.186	0.17	0.155	0.192	0.176	0.185	0.175	0.219	0.645	0.53	0.789	0.447
154.5	0.383	0.389	0.419	0.381	0.457	0.469	0.506	0.483	0.355	0.421	0.333	0.397	0.262	0.316	0.295	0.274		154.5	0.129	0.111	0.119	0.133	0.186	0.172	0.155	0.192	0.18	0.187	0.177	0.218	0.647	0.531	0.791	0.448
154.75	0.384	0.387	0.418	0.381	0.457	0.47	0.507	0.484	0.355	0.42	0.335	0.397	0.26	0.315	0.293	0.272		154.75	0.125	0.108	0.114	0.128	0.19	0.173	0.158	0.194	0.177	0.184	0.173	0.216	0.65	0.533	0.795	0.45
155	0.38	0.387	0.417	0.38	0.46	0.473	0.507	0.484	0.347	0.419	0.332	0.393	0.261	0.319	0.301	0.268		155	0.119	0.106	0.11	0.127	0.191	0.176	0.159	0.193	0.172	0.181	0.171	0.216	0.652	0.534	0.798	0.451
155.25	0.381	0.388	0.416	0.381	0.461	0.476	0.508	0.487	0.343	0.42	0.332	0.395	0.262	0.315	0.305	0.275		155.25	0.119	0.105	0.107	0.124	0.19	0.174	0.16	0.194	0.171	0.18	0.167	0.208	0.653	0.536	0.802	0.452
155.5	0.378	0.387	0.416	0.381	0.463	0.478	0.513	0.488	0.342	0.418	0.331	0.388	0.26	0.319	0.3	0.274		155.5	0.114	0.103	0.106	0.123	0.19	0.173	0.157	0.197	0.169	0.176	0.167	0.209	0.653	0.537	0.804	0.452
155.75	0.381	0.39	0.415	0.381	0.465	0.477	0.513	0.489	0.342	0.42	0.331	0.392	0.262	0.315	0.299	0.269		155.75	0.114	0.104	0.107	0.124	0.192	0.173	0.159	0.194	0.17	0.174	0.168	0.209	0.656	0.537	0.808	0.45
156	0.383	0.391	0.42	0.382	0.466	0.481	0.516	0.492	0.344	0.423	0.335	0.396	0.259	0.319	0.3	0.275		156	0.119	0.107	0.109	0.125	0.192	0.176	0.159	0.197	0.173	0.181	0.175	0.212	0.656	0.539	0.81	0.451
156.25	0.386	0.393	0.422	0.385	0.465	0.482	0.519	0.491	0.344	0.424	0.331	0.4	0.259	0.319	0.302	0.274		156.25	0.121	0.105	0.11	0.129	0.192	0.174	0.161	0.196	0.172	0.181	0.169	0.211	0.657	0.538	0.812	0.454
156.5	0.386	0.393	0.423	0.387	0.468	0.483	0.518	0.492	0.349	0.426	0.34	0.403	0.261	0.313	0.308	0.279		156.5	0.122	0.106	0.112	0.126	0.192	0.175	0.161	0.197	0.175	0.186	0.17	0.215	0.657	0.537	0.815	0.452
156.75	0.39	0.397	0.427	0.388	0.468	0.484	0.523	0.494	0.348	0.428	0.338	0.405	0.261	0.312	0.31	0.278		156.75	0.122	0.107	0.112	0.128	0.194	0.173	0.163	0.196	0.177	0.182	0.171	0.215	0.66	0.54	0.82	0.453
157	0.388	0.395	0.426	0.388	0.47	0.486	0.523	0.493	0.371	0.425	0.341	0.406	0.258	0.315	0.296	0.279		157	0.122	0.108	0.111	0.129	0.193	0.176	0.16	0.196	0.175	0.186	0.173	0.216	0.659	0.537	0.819	0.452
157.25	nd	nd	nd	nd	0.471	0.483	0.524	0.495	nd	nd	nd	nd	0.257	0.314	0.293	0.274		157.25	nd	nd	nd	nd	0.19	0.174	0.159	0.194	nd	nd	nd	nd	0.66	0.535	0.821	0.452
157.5	nd	nd	nd	nd	0.473	0.487	0.524	0.496	nd	nd	nd	nd	0.255	0.311	0.311	0.278		157.5	nd	nd	nd	nd	0.191	0.174	0.158	0.198	nd	nd	nd	nd	0.661	0.539	0.824	0.453
157.75	nd	nd	nd	nd	0.469	0.486	0.523	0.495	nd	nd	nd	nd	0.252	0.312	0.307	0.273		157.75	nd	nd	nd	nd	0.188	0.173	0.158	0.192	nd	nd	nd	nd	0.659	0.535	0.823	0.451
158	nd	nd	nd	nd	0.468	0.48	0.523	0.497	nd	nd	nd	nd	0.249	0.312	0.309	0.296		158	nd	nd	nd	nd	0.184	0.172	0.155	0.191	nd	nd	nd	nd	0.659	0.532	0.824	0.447
158.25	nd	nd	nd	nd	0.467	0.481	0.522	0.498	nd	nd	nd	nd	0.248	0.331	0.306	0.297		158.25	nd	nd	nd	nd	0.182	0.17	0.152	0.19	nd	nd	nd	nd	0.658	0.531	0.825	0.447
158.5	nd	nd	nd	nd	0.468	0.483	0.523	0.498	nd	nd	nd	nd	0.248	0.328	0.3	0.291		158.5	nd	nd	nd	nd	0.182	0.169	0.152	0.19	nd	nd	nd	nd	0.658	0.529	0.828	0.445
158.75	nd	nd	nd	nd	0.466	0.485	0.525	0.498	nd	nd	nd	nd	0.245	0.33	0.303	0.287		158.75	nd	nd	nd	nd	0.179	0.17	0.154	0.189	nd	nd	nd	nd	0.659	0.529	0.829	0.447
159	nd	nd	nd	nd	0.472	0.488	0.528	0.499	nd	nd	nd	nd	0.252	0.327	0.302	0.281		159	nd	nd	nd	nd	0.18	0.169	0.152	0.188	nd	nd	nd	nd	0.66	0.532	0.831	0.445
159.25	nd	nd	nd	nd	0.471	0.489	0.528	0.502	nd	nd	nd	nd	0.249	0.327	0.304	0.281		159.25	nd	nd	nd	nd	0.187	0.171	0.154	0.192	nd	nd	nd	nd	0.663	0.533	0.837	0.45
159.5	nd	nd	nd	nd	0.478	0.488	0.53	0.504	nd	nd	nd	nd	0.256	0.33	0.307	0.289		159.5	nd	nd	nd	nd	0.188	0.171	0.157	0.192	nd	nd	nd	nd	0.665	0.535	0.839	0.451
159.75	nd	nd	nd	nd	0.476	0.486	0.532	0.506	nd	nd	nd	nd	0.258	0.324	0.308	0.289		159.75	nd	nd	nd	nd	0.187	0.174	0.157	0.193	nd	nd	nd	nd	0.667	0.537	0.842	0.45
160	nd	nd	nd	nd	0.478	0.491	0.534	0.508	nd	nd	nd	nd	0.258	0.321	0.301	0.282		160	nd	nd	nd	nd	0.191	0.172	0.16	0.193	nd	nd	nd	nd	0.668	0.537	0.846	0.453
160.25	nd	nd	nd	nd	0.48	0.494	0.534	0.511	nd	nd	nd	nd	0.261	0.323	0.298	0.29		160.25	nd	nd	nd	nd	0.191	0.176	0.159	0.197	nd	nd	nd	nd	0.673	0.541	0.85	0.453
160.5	nd	nd	nd	nd	0.485	0.494	0.539	0.512	nd	nd	nd	nd	0.259	0.326	0.304	0.288		160.5	nd	nd	nd	nd	0.189	0.174	0.16	0.192	nd	nd	nd	nd	0.671	0.537	0.853	0.452
160.75	nd	nd	nd	nd	0.485	0.497	0.536	0.514	nd	nd	nd	nd	0.26	0.319	0.304	0.288		160.75	nd	nd	nd	nd	0.193	0.173	0.159	0.195	nd	nd	nd	nd	0.674	0.54	0.857	0.454
161	nd	nd	nd	nd	0.487	0.493	0.541	0.514	nd	nd	nd	nd	0.264	0.328	0.304	0.289		161	nd	nd	nd	nd	0.19	0.173	0.158	0.194	nd	nd	nd	nd	0.675	0.542	0.857	0.456
161.25	nd	nd	nd	nd	0.489	0.499	0.546	0.517	nd	nd	nd	nd	0.267	0.323	0.313	0.288		161.25	nd	nd	nd	nd	0.194	0.172	0.159	0.195	nd	nd	nd	nd	0.677	0.543	0.862	0.457
161.5	nd	nd	nd	nd	0.489	0.5	0.545	0.517	nd	nd	nd	nd	0.266	0.324	0.311	0.285		161.5	nd	nd	nd	nd	0.193	0.174	0.157	0.195	nd	nd	nd	nd	0.678	0.544	0.864	0.455
161.75	nd	nd	nd	nd	0.489	0.503	0.546	0.517	nd	nd	nd	nd	0.266	0.326	0.314	0.289		161.75	nd	nd	nd	nd	0.195	0.174	0.159	0.198	nd	nd	nd	nd	0.681	0.544	0.867	0.457
162	nd	nd	nd	nd	0.491	0.499	0.546	0.521	nd	nd	nd	nd	0.261	0.328	0.314	0.286		162	nd	nd	nd	nd	0.195	0.175	0.16	0.197	nd	nd	nd	nd	0.681	0.546	0.871	0.458
162.25	nd	nd	nd	nd	0.492	0.505	0.548	0.519	nd	nd	nd	nd	0.267	0.324	0.308	0.284		162.25	nd	nd	nd	nd	0.196	0.174	0.161	0.198	nd	nd	nd	nd	0.682	0.545	0.872	0.457
162.5	nd	nd	nd	nd	0.494	0.504	0.546	0.515	nd	nd	nd	nd	0.264	0.326	0.311	0.287		162.5	nd	nd	nd	nd	0.193	0.175	0.161	0.199	nd	nd	nd	nd	0.684	0.545	0.876	0.459
162.75	nd	nd	nd	nd	0.494	0.505	0.549	0.513	nd	nd	nd	nd	0.266	0.329	0.32	0.282		162.75	nd	nd	nd	nd	0.193	0.175	0.158	0.197	nd	nd	nd	nd	0.682	0.545	0.877	0.457
163	nd	nd	nd	nd	0.493	0.5	0.551	0.518	nd	nd	nd	nd	0.265	0.319	0.323	0.282		163	nd	nd	nd	nd	0.196	0.175	0.16	0.195	nd	nd	nd	nd	0.683	0.545	0.88	0.459
163.25	nd	nd	nd	nd	0.496	0.5	0.55	0.516	nd	nd	nd	nd	0.267	0.321	0.318	0.279		163.25	nd	nd	nd	nd	0.194	0.175	0.162	0.197	nd	nd	nd	nd	0.686	0.546	0.882	0.458
163.5	nd	nd	nd	nd	0.492	0.501	0.546	0.519	nd	nd	nd	nd	0.261	0.322	0.322	0.285		163.5	nd	nd	nd	nd	0.188	0.171	0.159	0.193	nd	nd	nd	nd	0.684	0.542	0.881	0.455
163.75	nd	nd	nd	nd	0.493	0.497	0.548	0.519	nd	nd	nd	nd	0.263	0.322	0.318	0.279		163.75	nd	nd	nd	nd	0.189	0.172	0.159	0.192	nd	nd	nd	nd	0.685	0.541	0.883	0.454
164	nd	nd	nd	nd	0.492	0.501	0.548	0.519	nd	nd	nd	nd	0.257	0.324	0.314	0.282		164	nd	nd	nd	nd	0.188	0.171	0.156	0.194	nd	nd	nd	nd	0.684	0.541	0.885	0.454
164.25	nd	nd	nd	nd	0.493	0.502	0.55	0.521	nd	nd	nd	nd	0.259	0.323	0.325	0.277		164.25	nd	nd	nd	nd	0.184	0.17	0.155	0.191	nd	nd	nd	nd	0.684	0.538	0.883	0.452
164.5	nd	nd	nd	nd	0.493	0.504	0.55	0.519	nd	nd	nd	nd	0.261	0.319	0.333	0.282		164.5	nd	nd	nd	nd	0.186	0.17	0.153	0.19	nd	nd	nd	nd	0.685	0.538	0.887	0.453
164.75	nd	nd	nd	nd	0.491	0.506	0.549	0.52	nd	nd	nd	nd	0.256	0.318	0.324	0.271		164.75	nd	nd	nd	nd	0.184	0.17	0.153	0.188	nd	nd	nd	nd	0.685	0.537	0.889	0.452
165	nd	nd	nd	nd	0.496	0.502	0.554	0.523	nd	nd	nd	nd	0.257	0.314	0.325	0.276		165	nd	nd	nd	nd	0.186	0.17	0.153	0.19	nd	nd	nd	nd	0.687	0.541	0.893	0.454
165.25	nd	nd	nd	nd	0.497	0.504	0.556	0.521	nd	nd	nd	nd	0.257	0.32	0.331	0.277		165.25	nd	nd	nd	nd	0.186	0.171	0.153	0.19	nd	nd	nd	nd	0.689	0.542	0.894	0.454
165.5	nd	nd	nd	nd	0.501	0.507	0.557	0.521	nd	nd	nd	nd	0.255	0.322	0.33	0.277		165.5	nd	nd	nd	nd	0.188	0.174	0.158	0.193	nd	nd	nd	nd	0.693	0.543	0.9	0.457
165.75	nd	nd	nd	nd	0.504	0.509	0.561	0.521	nd	nd	nd	nd	0.256	0.324	0.336	0.279		165.75	nd	nd	nd	nd	0.19	0.175	0.16	0.195	nd	nd	nd	nd	0.696	0.545	0.903	0.459
																		166	nd	nd	nd	nd	0.192	0.176	0.161	0.197	nd	nd	nd	nd	0.699	0.549	0.909	0.461

## Sheet: Ext Fig_3b
Final OD730nm		FL+
		LT	HL1	HL2	HL12
		0.196	0.138	0.098	0.148
		0.194	0.138	0.099	0.092
		0.188	0.149	0.095	0.157
		0.191	0.147	0.095	0.131
		0.169	0.143	0.097	0.142
		0.163	0.142	0.095	0.14
		0.173			0.159
		0.178			0.233
Bonferroni & Holm p value:		LT	HL1	HL2	HL12
*** p≤0.001	LT		0.0118877	1.8223e-06	0.020698
** p≤0.01	HL1	0.0118877		0.0061594	0.546737
* p≤0.05	HL2	1.8223e-06	0.0061594		0.0008842
insignificant	HL12	0.020698	0.546737	0.0008842
	Group superscript	A	B	C	B
	Average	0.1815	0.142833	0.0965	0.15025
	SD	0.0124327	0.00453505	0.00176068	0.0394815
	% to LT		0.786961	0.53168	0.827824
	Median	0.183	0.1425	0.096	0.145
	Q1	0.17	0.138	0.095	0.13325
	Q3	0.19325	0.1475	0.09825	0.1585
	1.5×IQR	0.034875	0.01425	0.004875	0.037875

## Sheet: Ext Fig_3c
	under FL+
genotype	LT				HL1			HL2			HL1/2
replicate #	1	2	3	4	1	2	3	1	2	3	1	2	3	4
time[h]
0	0.049	0.056	0.051	0.008	0.092	0.081	0.08	0.084	0.074	0.071	0.091	0.111	0.104	0.118
1	0.051	0.053	0.053	0.011	0.094	0.082	0.081	0.086	0.076	0.073	0.109	0.111	0.096	0.123
2	0.054	0.056	0.055	0.015	0.095	0.081	0.083	0.087	0.077	0.076	0.109	0.115	0.104	0.126
3	0.056	0.058	0.058	0.017	0.097	0.083	0.084	0.087	0.076	0.073	0.113	0.114	0.096	0.119
4	0.062	0.061	0.063	0.022	0.1	0.086	0.087	0.089	0.08	0.078	0.118	0.116	0.103	0.126
5	0.065	0.063	0.066	0.027	0.102	0.089	0.089	0.091	0.081	0.077	0.115	0.124	0.107	0.129
6	0.067	0.065	0.066	0.03	0.104	0.09	0.089	0.092	0.08	0.076	0.116	0.126	0.108	0.133
7	0.068	0.066	0.068	0.032	0.106	0.092	0.092	0.095	0.084	0.082	0.117	0.128	0.109	0.13
8	0.071	0.068	0.072	0.035	0.109	0.095	0.092	0.096	0.083	0.081	0.129	0.131	0.106	0.133
9	0.074	0.07	0.074	0.039	0.109	0.096	0.096	0.1	0.086	0.083	0.129	0.13	0.115	0.141
10	0.077	0.073	0.076	0.041	0.113	0.097	0.097	0.101	0.089	0.086	0.127	0.136	0.114	0.134
11	0.078	0.075	0.078	0.045	0.113	0.1	0.097	0.102	0.088	0.085	0.129	0.138	0.113	0.141
12	0.081	0.076	0.079	0.046	0.114	0.101	0.1	0.105	0.092	0.088	0.134	0.133	0.116	0.147
13	0.082	0.077	0.081	0.048	0.115	0.102	0.1	0.107	0.091	0.088	0.133	0.137	0.114	0.143
14	0.082	0.077	0.082	0.05	0.115	0.104	0.101	0.109	0.095	0.091	0.136	0.141	0.124	0.146
15	0.082	0.078	0.083	0.051	0.117	0.106	0.102	0.111	0.095	0.092	0.139	0.141	0.125	0.146
16	0.081	0.077	0.081	0.051	0.117	0.106	0.104	0.113	0.097	0.094	0.14	0.145	0.126	0.151
17	0.081	0.078	0.083	0.052	0.118	0.108	0.106	0.116	0.101	0.098	0.138	0.143	0.126	0.15
18	0.08	0.078	0.08	0.052	0.119	0.109	0.105	0.116	0.102	0.099	0.142	0.145	0.133	0.153
19	0.079	0.079	0.081	0.052	0.119	0.109	0.107	0.119	0.103	0.102	0.145	0.143	0.133	0.154
20	0.079	0.08	0.081	0.053	0.123	0.113	0.107	0.12	0.105	0.102	0.142	0.149	0.13	0.162
21	0.081	0.081	0.082	0.078	0.123	0.113	0.11	0.124	0.112	0.106	0.144	0.146	0.135	0.161
22	0.084	0.084	0.084	0.083	0.126	0.115	0.111	0.121	0.111	0.106	0.141	0.148	0.136	0.161
23	0.086	0.084	0.085	0.082	0.125	0.117	0.111	0.125	0.111	0.106	0.145	0.149	0.138	0.16
24	0.084	0.085	0.085	0.082	0.125	0.118	0.115	0.127	0.116	0.113	0.15	0.154	0.136	0.163
25	0.084	0.084	0.084	0.082	0.13	0.12	0.117	0.129	0.117	0.113	0.144	0.154	0.137	0.167
26	0.086	0.086	0.087	0.084	0.13	0.121	0.12	0.13	0.116	0.113	0.151	0.152	0.141	0.168
27	0.091	0.089	0.092	0.087	0.132	0.124	0.12	0.134	0.12	0.117	0.155	0.159	0.137	0.168
28	0.093	0.091	0.093	0.09	0.136	0.125	0.123	0.134	0.117	0.116	0.153	0.16	0.144	0.169
29	0.095	0.093	0.096	0.092	0.136	0.128	0.121	0.135	0.118	0.115	0.158	0.159	0.137	0.17
30	0.099	0.094	0.097	0.094	0.139	0.13	0.125	0.138	0.12	0.117	0.154	0.161	0.151	0.162
31	0.1	0.096	0.099	0.094	0.142	0.132	0.126	0.138	0.121	0.119	0.156	0.164	0.151	0.169
32	0.101	0.096	0.101	0.095	0.141	0.133	0.129	0.143	0.125	0.122	0.164	0.167	0.151	0.174
33	0.104	0.1	0.102	0.097	0.143	0.136	0.129	0.142	0.123	0.12	0.159	0.168	0.154	0.17
34	0.106	0.102	0.104	0.099	0.146	0.135	0.13	0.143	0.127	0.122	0.166	0.166	0.153	0.175
35	0.108	0.102	0.104	0.101	0.147	0.136	0.131	0.141	0.125	0.107	0.161	0.168	0.153	0.167
36	0.109	0.104	0.106	0.103	0.147	0.14	0.132	0.143	0.125	0.108	0.167	0.168	0.151	0.167
37	0.112	0.105	0.106	0.104	0.149	0.139	0.134	0.145	0.128	0.103	0.171	0.17	0.151	0.174
38	0.11	0.106	0.107	0.105	0.149	0.142	0.134	0.144	0.129	0.071	0.164	0.167	0.15	0.17
39	0.11	0.107	0.107	0.105	0.148	0.141	0.134	0.143	0.127	0.074	0.166	0.164	0.155	0.171
40	0.108	0.106	0.105	0.104	0.148	0.142	0.137	0.143	0.129	0.082	0.167	0.167	0.152	0.177
41	0.108	0.105	0.105	0.103	0.151	0.143	0.137	0.143	0.129	0.078	0.167	0.17	0.151	0.179
42	0.108	0.106	0.104	0.103	0.154	0.144	0.137	0.14	0.131	0.078	0.17	0.168	0.16	0.182
43	0.107	0.108	0.106	0.105	0.152	0.145	0.139	0.139	0.129	0.081	0.164	0.169	0.159	0.178
44	0.108	0.108	0.105	0.103	0.151	0.144	0.14	0.143	0.133	0.082	0.167	0.167	0.157	0.177
45	0.107	0.109	0.105	0.104	0.156	0.147	0.141	0.14	0.125	0.08	0.169	0.171	0.155	0.184
46	0.106	0.108	0.104	0.105	0.154	0.148	0.144	0.135	0.127	0.082	0.173	0.168	0.156	0.188
47	0.108	0.109	0.106	0.105	0.153	0.148	0.144	0.138	0.122	0.077	0.164	0.173	0.155	0.185
48	0.11	0.11	0.108	0.106	0.155	0.149	0.144	0.128	0.117	0.077	0.171	0.173	0.161	0.18
49	0.109	0.111	0.108	0.105	0.158	0.151	0.145	0.127	0.109	0.076	0.168	0.174	0.153	0.183
50	0.111	0.112	0.11	0.106	0.157	0.151	0.146	0.125	0.103	0.073	0.173	0.176	0.164	0.183
51	0.113	0.113	0.112	0.108	0.158	0.153	0.146	0.123	0.102	0.066	0.175	0.175	0.158	0.183
52	0.117	0.114	0.111	0.109	0.16	0.154	0.147	0.119	0.1	0.071	0.178	0.175	0.16	0.186
53	0.121	0.118	0.114	0.113	0.161	0.156	0.147	0.114	0.132	0.066	0.179	0.176	0.157	0.187
54	0.121	0.118	0.116	0.114	0.163	0.157	0.147	0.116	0.129	0.059	0.172	0.177	0.159	0.184
55	0.126	0.12	0.118	0.115	0.165	0.156	0.148	0.123	0.128	0.054	0.176	0.176	0.157	0.184
56	0.127	0.121	0.122	0.117	0.167	0.165	0.15	0.124	0.128	0.062	0.18	0.18	0.159	0.188
57	0.128	0.122	0.122	0.118	0.167	0.16	0.152	0.123	0.129	0.053	0.176	0.181	0.162	0.189
58	0.129	0.122	0.12	0.119	0.166	0.16	0.154	0.126	0.127	0.053	0.176	0.18	0.162	0.188
59	0.13	0.123	0.124	0.12	0.172	0.164	0.155	0.125	0.127	0.047	0.181	0.178	0.159	0.189
60	0.134	0.124	0.125	0.122	0.171	0.164	0.155	0.128	0.125	0.049	0.182	0.18	0.163	0.184
61	0.134	0.127	0.126	0.123	0.171	0.164	0.154	0.129	0.128	0.055	0.177	0.182	0.161	0.19
62	0.132	0.125	0.125	0.122	0.171	0.164	0.155	0.129	0.127	0.052	0.181	0.187	0.163	0.188
63	0.134	0.127	0.127	0.124	0.171	0.165	0.156	0.127	0.124	0.055	0.181	0.181	0.169	0.185
64	0.134	0.126	0.126	0.123	0.171	0.166	0.156	0.127	0.123	0.066	0.177	0.181	0.163	0.192
65	0.132	0.127	0.126	0.124	0.17	0.163	0.156	0.13	0.124	0.066	0.178	0.187	0.167	0.19
66	0.132	0.127	0.126	0.124	0.17	0.164	0.157	0.137	0.12	0.065	0.178	0.186	0.164	0.188
67	0.132	0.127	0.125	0.122	0.172	0.165	0.156	0.136	0.119	0.071	0.176	0.182	0.171	0.191
68	0.13	0.126	0.125	0.123	0.172	0.165	0.159	0.136	0.122	0.08	0.181	0.182	0.166	0.195
69	0.13	0.126	0.123	0.122	0.171	0.166	0.158	0.135	0.119	0.085	0.181	0.182	0.172	0.189
70	0.131	0.128	0.125	0.123	0.169	0.165	0.158	0.134	0.121	0.087	0.176	0.183	0.172	0.195
71	0.132	0.127	0.125	0.125	0.173	0.167	0.158	0.134	0.121	0.09	0.182	0.18	0.168	0.195
72	0.131	0.128	0.126	0.125	0.174	0.171	0.157	0.131	0.114	0.088	0.178	0.185	0.164	0.192
73	0.133	0.129	0.127	0.126	0.174	0.168	0.159	0.131	0.121	0.091	0.184	0.184	0.168	0.192
74	0.135	0.129	0.129	0.127	0.174	0.17	0.16	0.128	0.113	0.091	0.177	0.188	0.167	0.193
75	0.138	0.131	0.13	0.128	0.176	0.17	0.164	0.129	0.117	0.096	0.178	0.179	0.17	0.19
76	0.141	0.134	0.132	0.132	0.175	0.172	0.166	0.128	0.116	0.094	0.179	0.181	0.17	0.19
77	0.143	0.135	0.135	0.135	0.178	0.172	0.166	0.127	0.111	0.095	0.179	0.179	0.162	0.191
78	0.147	0.136	0.137	0.134	0.177	0.171	0.165	0.124	0.109	0.097	0.181	0.188	0.169	0.191
79	0.146	0.135	0.137	0.136	0.179	0.172	0.165	0.123	0.108	0.097	0.188	0.184	0.168	0.189
80	0.147	0.137	0.136	0.137	0.18	0.173	0.164	0.122	0.106	0.091	0.189	0.181	0.162	0.194
81	0.147	0.137	0.138	0.136	0.181	0.175	0.166	0.12	0.106	0.098	0.187	0.183	0.166	0.191
82	0.149	0.137	0.137	0.138	0.181	0.175	0.167	0.12	0.103	0.092	0.186	0.182	0.166	0.194
83	0.151	0.138	0.14	0.138	0.182	0.178	0.167	0.117	0.104	0.098	0.182	0.182	0.165	0.189
84	0.15	0.138	0.138	0.137	0.181	0.175	0.169	0.118	0.103	0.096	0.188	0.18	0.168	0.188
85	0.151	0.137	0.139	0.139	0.182	0.177	0.166	0.115	0.1	0.095	0.182	0.185	0.167	0.189
86	0.151	0.139	0.14	0.138	0.181	0.177	0.166	0.115	0.1	0.096	0.184	0.182	0.164	0.185
87	0.151	0.141	0.139	0.139	0.181	0.175	0.168	0.116	0.101	0.1	0.183	0.187	0.164	0.191
88	0.152	0.14	0.14	0.139	0.181	0.174	0.168	0.117	0.102	0.099	0.188	0.181	0.167	0.195
89	0.151	0.139	0.14	0.138	0.178	0.174	0.167	0.113	0.101	0.101	0.182	0.186	0.167	0.193
90	0.149	0.138	0.138	0.139	0.179	0.176	0.169	0.114	0.099	0.099	0.18	0.182	0.171	0.196
91	0.149	0.14	0.138	0.137	0.178	0.174	0.167	0.114	0.101	0.102	0.184	0.182	0.164	0.198
92	0.147	0.139	0.138	0.138	0.178	0.175	0.167	0.115	0.101	0.099	0.18	0.184	0.167	0.192
93	0.147	0.139	0.137	0.137	0.179	0.175	0.167	0.11	0.099	0.106	0.178	0.187	0.164	0.188
94	0.149	0.139	0.137	0.136	0.176	0.173	0.17	0.111	0.095	0.097	0.178	0.18	0.169	0.191
95	0.148	0.139	0.137	0.136	0.179	0.173	0.17	0.108	0.095	0.097	0.179	0.183	0.167	0.194
96	0.149	0.139	0.138	0.137	0.177	0.174	0.17	0.108	0.093	0.101	0.182	0.182	0.165	0.19
97	0.149	0.14	0.138	0.139	0.179	0.177	0.169	0.11	0.095	0.093	0.18	0.187	0.162	0.196
98	0.151	0.142	0.139	0.14	0.181	0.178	0.17	0.103	0.094	0.098	0.186	0.179	0.167	0.186
99	0.152	0.141	0.139	0.141	0.18	0.177	0.17	0.105	0.09	0.093	0.181	0.183	0.165	0.189
100	0.154	0.145	0.142	0.143	0.184	0.177	0.172	0.104	0.09	0.095	0.183	0.178	0.163	0.184
101	0.157	0.144	0.142	0.144	0.183	0.176	0.171	0.103	0.092	0.095	0.179	0.184	0.165	0.188
102	0.158	0.146	0.144	0.144	0.185	0.182	0.172	0.099	0.087	0.092	0.184	0.178	0.168	0.191
103	0.161	0.145	0.145	0.145	0.183	0.178	0.172	0.097	0.092	0.093	0.186	0.182	0.165	0.187
104	0.164	0.147	0.144	0.146	0.181	0.18	0.174	0.096	0.09	0.094	0.183	0.179	0.165	0.192
105	0.162	0.147	0.144	0.147	0.183	0.18	0.171	0.097	0.09	0.092	0.186	0.174	0.159	0.187
106	0.163	0.15	0.146	0.147	0.183	0.18	0.171	0.096	0.09	0.098	0.182	0.177	0.161	0.184
107	0.163	0.149	0.147	0.146	0.185	0.18	0.172	0.096	0.09	0.092	0.186	0.185	0.159	0.188
108	0.163	0.148	0.148	0.147	0.186	0.18	0.171	0.093	0.089	0.093	0.185	0.182	0.163	0.188
109	0.164	0.149	0.147	0.147	0.186	0.181	0.171	0.093	0.09	0.094	0.181	0.184	0.159	0.186
110	0.165	0.148	0.148	0.147	0.183	0.179	0.173	0.094	0.092	0.1	0.188	0.183	0.158	0.186
111	0.164	0.148	0.147	0.148	0.183	0.182	0.171	0.093	0.087	0.093	0.186	0.174	0.163	0.185
112	0.163	0.149	0.146	0.148	0.182	0.182	0.173	0.094	0.091	0.095	0.189	0.182	0.161	0.188
113	0.162	0.148	0.144	0.147	0.181	0.181	0.171	0.092	0.092	0.098	0.179	0.181	0.161	0.181
114	0.162	0.151	0.164	0.149	0.179	0.18	0.171	0.092	0.092	0.101	0.186	0.175	0.156	0.186
115	0.162	0.152	0.164	0.147	0.182	0.178	0.171	0.088	0.092	0.1	0.179	0.182	0.16	0.186
116	0.161	0.15	0.164	0.146	0.181	0.18	0.171	0.089	0.09	0.099	0.176	0.184	0.16	0.19
117	0.16	0.15	0.164	0.147	0.178	0.18	0.172	0.09	0.089	0.102	0.179	0.181	0.16	0.189
118	0.16	0.151	0.164	0.146	0.178	0.179	0.171	0.088	0.091	0.106	0.183	0.176	0.163	0.186
119	0.159	0.152	0.164	0.146	0.176	0.179	0.172	0.091	0.095	0.107	0.176	0.179	0.158	0.187
120	0.159	0.148	0.164	0.147	0.181	0.18	0.174	0.091	0.092	0.104	0.175	0.176	0.158	0.187
121	0.162	0.15	0.164	0.148	0.182	0.181	0.172	0.089	0.089	0.105	0.183	0.18	0.156	0.183
122	0.164	0.149	0.164	0.147	0.18	0.18	0.174	0.089	0.09	0.102	0.175	0.175	0.161	0.188
123	0.163	0.151	0.164	0.149	0.18	0.18	0.172	0.089	0.09	0.098	0.182	0.172	0.16	0.182
124	0.167	0.153	0.164	0.15	0.181	0.181	0.173	0.091	0.087	0.099	0.181	0.181	0.16	0.188
125	0.168	0.155	0.164	0.151	0.182	0.182	0.173	0.09	0.086	0.097	0.183	0.179	0.161	0.179
126	0.171	0.153	0.164	0.153	0.185	0.183	0.171	0.09	0.088	0.099	0.177	0.175	0.162	0.178
127	0.171	0.157	0.164	0.153	0.179	0.182	0.174	0.092	0.092	0.106	0.183	0.176	0.155	0.179
128	0.173	0.156	0.164	0.152	0.183	0.183	0.173	0.09	0.085	0.1	0.185	0.174	0.159	0.178
129	0.172	0.155	0.164	0.154	0.184	0.182	0.171	0.09	0.087	0.101	0.18	0.175	0.155	0.176
130	0.172	0.157	0.164	0.153	0.183	0.184	0.172	0.092	0.087	0.097	0.18	0.177	0.155	0.179
131	0.172	0.157	0.164	0.153	0.18	0.183	0.175	0.093	0.091	0.103	0.181	0.174	0.161	0.183
132	0.174	0.156	0.164	0.154	0.185	0.183	0.173	0.092	0.09	0.099	0.183	0.178	0.157	0.184
133	0.174	0.156	0.164	0.151	0.182	0.182	0.174	0.095	0.093	0.103	0.181	0.18	0.158	0.177
134	0.172	0.157	0.164	0.155	0.183	0.183	0.172	0.092	0.086	0.095	0.179	0.172	0.157	0.175
135	0.175	0.157	0.164	0.152	0.181	0.18	0.175	0.094	0.093	0.108	0.181	0.172	0.156	0.18
136	0.174	0.155	0.164	0.153	0.18	0.182	0.172	0.095	0.093	0.102	0.181	0.174	0.15	0.178
137	nd	nd	nd	nd	0.181	0.181	0.173	0.093	0.092	0.099	0.18	0.172	0.153	0.18
138	nd	nd	nd	nd	0.176	0.179	0.164	0.095	0.095	0.104	0.181	0.179	0.156	0.179
139	nd	nd	nd	nd	0.177	0.18	0.162	0.097	0.095	0.102	0.175	0.177	0.157	0.181
140	nd	nd	nd	nd	0.177	0.181	0.162	0.097	0.096	0.099	0.18	0.178	0.156	0.179
141	nd	nd	nd	nd	0.178	0.181	0.159	0.096	0.096	0.1	0.174	0.18	0.16	0.183
142	nd	nd	nd	nd	0.177	0.181	0.162	0.095	0.093	0.098	0.177	0.172	0.157	0.183
143	nd	nd	nd	nd	0.178	0.181	0.159	0.094	0.091	0.098	0.18	0.176	0.163	0.186
144	nd	nd	nd	nd	0.177	0.182	0.159	0.097	0.096	0.1	0.174	0.18	0.157	0.185
145	nd	nd	nd	nd	0.18	0.182	0.161	0.098	0.093	0.097	0.175	0.171	0.163	0.177
146	nd	nd	nd	nd	0.176	0.183	0.155	0.097	0.095	0.103	0.177	0.179	0.164	0.188
147	nd	nd	nd	nd	0.18	0.176	0.173	0.097	0.094	0.099	0.175	0.172	0.155	0.182
148	nd	nd	nd	nd	0.178	0.174	0.172	0.098	0.094	0.098	0.181	0.171	0.154	0.177
149	nd	nd	nd	nd	0.181	0.178	0.175	0.098	0.093	0.096	0.175	0.179	0.161	0.184
150	nd	nd	nd	nd	0.18	0.18	0.175	0.1	0.094	0.1	0.172	0.177	0.161	0.179
151	nd	nd	nd	nd	0.18	0.177	0.174	0.101	0.093	0.098	0.176	0.178	0.159	0.184
152	nd	nd	nd	nd	0.179	0.177	0.176	0.101	0.097	0.103	0.177	0.179	0.157	0.178
153	nd	nd	nd	nd	0.18	0.177	0.178	0.1	0.092	0.094	0.175	0.173	0.153	0.179
154	nd	nd	nd	nd	0.18	0.178	0.175	0.1	0.093	0.098	0.178	0.172	0.155	0.175
155	nd	nd	nd	nd	0.181	0.179	0.174	0.1	0.093	0.096	0.183	0.174	0.154	0.179
156	nd	nd	nd	nd	0.18	0.176	0.175	0.102	0.094	0.096	0.184	0.177	0.152	0.18
157	nd	nd	nd	nd	0.179	0.176	0.174	0.101	0.092	0.096	0.177	0.173	0.157	0.169
158	nd	nd	nd	nd	0.18	0.177	0.174	0.103	0.093	0.097	0.175	0.18	0.153	0.179
159	nd	nd	nd	nd	0.178	0.177	0.176	0.103	0.095	0.098	0.178	0.178	0.152	0.177
160	nd	nd	nd	nd	0.179	0.175	0.173	0.104	0.096	0.095	0.181	0.177	0.151	0.173
161	nd	nd	nd	nd	0.181	0.175	0.174	0.106	0.098	0.097	0.178	0.176	0.157	0.18
162	nd	nd	nd	nd	0.178	0.175	0.173	0.106	0.096	0.095	0.176	0.171	0.157	0.176
163	nd	nd	nd	nd	0.181	0.175	0.173	0.106	0.095	0.097	0.172	0.179	0.162	0.182
164	nd	nd	nd	nd	0.177	0.174	0.175	0.107	0.097	0.098	nd	nd	nd	nd
165	nd	nd	nd	nd	0.176	0.173	0.172	0.109	0.101	0.1	nd	nd	nd	nd
166	nd	nd	nd	nd	0.176	0.174	0.174	0.112	0.1	0.1	nd	nd	nd	nd
167	nd	nd	nd	nd	0.176	0.172	0.173	0.11	0.099	0.099	nd	nd	nd	nd
168	nd	nd	nd	nd	0.178	0.175	0.171	0.109	0.096	0.095	nd	nd	nd	nd
169	nd	nd	nd	nd	0.178	0.175	0.173	0.109	0.095	0.096	nd	nd	nd	nd
170	nd	nd	nd	nd	0.179	0.176	0.174	0.109	0.096	0.096	nd	nd	nd	nd
171	nd	nd	nd	nd	0.178	0.174	0.173	0.11	0.095	0.095	nd	nd	nd	nd
172	nd	nd	nd	nd	0.177	0.174	0.173	0.112	0.1	0.097	nd	nd	nd	nd
173	nd	nd	nd	nd	0.177	0.176	0.173	0.113	0.101	0.098	nd	nd	nd	nd
174	nd	nd	nd	nd	0.178	0.178	0.171	0.112	0.096	0.097	nd	nd	nd	nd
175	nd	nd	nd	nd	0.179	0.176	0.17	0.11	0.099	0.097	nd	nd	nd	nd
176	nd	nd	nd	nd	0.178	0.173	0.171	0.113	0.096	0.096	nd	nd	nd	nd
177	nd	nd	nd	nd	0.178	0.174	0.173	0.114	0.097	0.099	nd	nd	nd	nd
178	nd	nd	nd	nd	0.178	0.176	0.171	0.112	0.096	0.095	nd	nd	nd	nd
179	nd	nd	nd	nd	0.176	0.174	0.172	0.112	0.096	0.097	nd	nd	nd	nd
180	nd	nd	nd	nd	0.177	0.172	0.172	0.114	0.095	0.096	nd	nd	nd	nd
181	nd	nd	nd	nd	0.179	0.173	0.171	0.115	0.102	0.099	nd	nd	nd	nd
182	nd	nd	nd	nd	0.179	0.175	0.173	0.117	0.099	0.101	nd	nd	nd	nd
183	nd	nd	nd	nd	0.177	0.172	0.17	0.115	0.099	0.097	nd	nd	nd	nd
184	nd	nd	nd	nd	0.177	0.173	0.17	0.116	0.099	0.099	nd	nd	nd	nd
