# Supplementary material
Source: Research Square preprint supplement (doi:10.21203/rs.3.rs-6305715/v1)
Supplement: Supplementary file 3 [file 46ce198f9ed10e53921dc93a.xlsx]

## Sheet: description
Supplemental Data 7. Vector sequences of pUC57-mini and Synechocystis pam68 and rpaB overexpression constructs
abbreviation	meaning
OE	over-expression
CmR	chloramphenicol resistance gene
KanR	kanamycin resistance gene
CDS	coding sequence
misc	miscellaneous

## Sheet: pUC57-mini
pUC57-Mini Sequence (1835 bp):
1	CCAATGATAT	CGGAAAGAAC	ATGTGAGCAA	AAGGCCAGCA	AAAGGCCAGG	AACCGTAAAA
61	AGGCCGCGTT	GCTGGCGTTT	TTCCATAGGC	TCCGCCCCCC	TGACGAGCAT	CACAAAAATC
121	GACGCTCAAG	TCAGAGGTGG	CGAAACCCGA	CAGGACTATA	AAGATACCAG	GCGTTTCCCC
181	CTGGAAGCTC	CCTCGTGCGC	TCTCCTGTTC	CGACCCTGCC	GCTTACCGGA	TACCTGTCCG
241	CCTTTCTCCC	TTCGGGAAGC	GTGGCGCTTT	CTCATAGCTC	ACGCTGTAGG	TATCTCAGTT
301	CGGTGTAGGT	CGTTCGCTCC	AAGCTGGGCT	GTGTGCACGA	ACCCCCCGTT	CAGCCCGACC
361	GCTGCGCCTT	ATCCGGTAAC	TATCGTCTTG	AGTCCAACCC	GGTAAGACAC	GACTTATCGC
421	CACTGGCAGC	AGCCACTGGT	AACAGGATTA	GCAGAGCGAG	GTATGTAGGC	GGTGCTACAG
481	AGTTCTTGAA	GTGGTGGCCT	AACTACGGCT	ACACTAGAAG	AACAGTATTT	GGTATCTGCG
541	CTCTGCTGAA	GCCAGTTACC	TTCGGAAAAA	GAGTTGGTAG	CTCTTGATCC	GGCAAACAAA
601	CCACCGCTGG	TAGCGGTGGT	TTTTTTGTTT	GCAAGCAGCA	GATTACGCGC	AGAAAAAAAG
661	GATCTCAAGA	AGATCCTTTG	ATCTTTTCTA	CGGGGTCTGA	CGCTCAGTGG	AACGAAAACT
721	CACGTTAAGG	GATTTTGGTC	ATGAGATTAT	CAAAAAGGAT	CTTCACCTAG	ATCCTTTTAA
781	ATTAAAAATG	AAGTTTTAAA	TCAATCTAAA	GTATATATGA	GTAAACTTGG	TCTGACAGTT
841	ACCAATGCTT	AATCAGTGAG	GCACCTATCT	CAGCGATCTG	TCTATTTCGT	TCATCCATAG
901	TTGCCTGACT	CCCCGTCGTG	TAGATAACTA	CGATACGGGA	GGGCTTACCA	TCTGGCCCCA
961	GTGCTGCAAT	GATACCGCGA	GACCCACGCT	CACCGGCTCC	AGATTTATCA	GCAATAAACC
1021	AGCCAGCCGG	AAGGGCCGAG	CGCAGAAGTG	GTCCTGCAAC	TTTATCCGCC	TCCATCCAGT
1081	CTATTAATTG	TTGCCGGGAA	GCTAGAGTAA	GTAGTTCGCC	AGTTAATAGT	TTGCGCAACG
1141	TTGTTGCCAT	TGCTACAGGC	ATCGTGGTGT	CACGCTCGTC	GTTTGGTATG	GCTTCATTCA
1201	GCTCCGGTTC	CCAACGATCA	AGGCGAGTTA	CATGATCCCC	CATGTTGTGC	AAAAAAGCGG
1261	TTAGCTCCTT	CGGTCCTCCG	ATCGTTGTCA	GAAGTAAGTT	GGCCGCAGTG	TTATCACTCA
1321	TGGTTATGGC	AGCACTGCAT	AATTCTCTTA	CTGTCATGCC	ATCCGTAAGA	TGCTTTTCTG
1381	TGACTGGTGA	GTACTCAACC	AAGTCATTCT	GAGAATAGTG	TATGCGGCGA	CCGAGTTGCT
1441	CTTGCCCGGC	GTCAATACGG	GATAATACCG	CGCCACATAG	CAGAACTTTA	AAAGTGCTCA
1501	TCATTGGAAA	ACGTTCTTCG	GGGCGAAAAC	TCTCAAGGAT	CTTACCGCTG	TTGAGATCCA
1561	GTTCGATGTA	ACCCACTCGT	GCACCCAACT	GATCTTCAGC	ATCTTTTACT	TTCACCAGCG
1621	TTTCTGGGTG	AGCAAAAACA	GGAAGGCAAA	ATGCCGCAAA	AAAGGGAATA	AGGGCGACAC
1681	GGAAATGTTG	AATACTCATA	CTCTTCCTTT	TTCAATATTA	TTGAAGCATT	TATCAGGGTT
1741	ATTGTCTCAT	GAGCGGATAC	ATATTTGAAT	GTATTTAGAA	AAATAAACAA	ATAGGGGTTC
1801	CGCGCACATT	TCCCCGAAAA	GTGCCACCTG	ACGTC

## Sheet: pOEpam68_CmR
LOCUS pOEpam68_CmR 7933 bp DNA circular UNA 26-FEB-2025
DEFINITION A new nucleotide sequence entered manually.
ACCESSION urn.local...j-iv1f4g9
VERSION urn.local...j-iv1f4g9
KEYWORDS .
SOURCE
ORGANISM .
FEATURES Location/Qualifiers
misc_feature 1..7933
/note="Geneious type: Editing History Insertion"
/standard_name
gene 1..777
/standard_name="CmR (cat)"
misc_feature 778..1497
/standard_name="slr0168 downstream region"
misc_feature 1498..6366
/standard_name="pICH69822 vector backbone"
misc_feature 6367..7093
/standard_name="slr0168 upstream region"
regulatory 7094..7261
/note="Geneious type: promoter"
/standard_name="PpsbA2"
CDS 7262..7738
/standard_name="pam68 coding sequence"
regulatory 7739..7933
/note="Geneious type: terminator"
/standard_name="pam68 terminator"
ORIGIN
1 aagaggttcc aactttcacc ataatgaaat aagatcacta ccgggcgtat tttttgagtt
61 atcgagattt tcaggagcta aggaagctaa aatggagaaa aaaatcactg gatataccac
121 cgttgatata tcccaatggc atcgtaaaga acattttgag gcatttcagt cagttgctca
181 atgtacctat aaccagaccg ttcagctgga tattacggcc tttttaaaga ccgtaaagaa
241 aaataagcac aagttttatc cggcctttat tcacattctt gcccgcctga tgaatgctca
301 tccggaattc cgtatggcaa tgaaagacgg tgagctggtg atatgggata gtgttcaccc
361 ttgttacacc gttttccatg agcaaactga aacgttttca tcgctctgga gtgaatacca
421 cgacgatttc cggcagtttc tacacatata ttcgcaagat gtggcgtgtt acggtgaaaa
481 cctggcctat ttccctaaag ggtttattga gaatatgttt ttcgtctcag ccaatccctg
541 ggtgagtttc accagttttg atttaaacgt ggccaatatg gacaacttct tcgcccccgt
601 tttcaccatg ggcaaatatt atacgcaagg cgacaaggtg ctgatgccgc tggcgattca
661 ggttcatcat gccgtctgtg atggcttcca tgtcggcaga atgcttaatg aattacaaca
721 gtactgcgat gagtggcagg gcggggcgta atttttttaa ggcagttatt ggtgcccctc
781 aggggcatta tcggagcaag ccgatattca ggtaagatgg ggcggtgctt ttgtgggttg
841 atccattagc tttaacccca ttgtctccac tgacggtaat agttttcccc actgcgatta
901 attgttttgt ttggaggagg gactgcccca ccgtcagccc gccgccatag ttttgcattt
961 ccactgccat gggcatcgaa ctccgtagtt acgtttacct ggatagtctc cagtcccaac
1021 atgcagccta cattgggacg gtggcctccg gctttttgcc gctaccgggg gattgttccc
1081 tctgggtgga agtttcccca ggcattgaaa ttaaccgcat taccgatatt gctcttaagg
1141 cagcggtggt gcggccgggg gtattatttg tggaacggct ctacggtttg ttggaaatcc
1201 atgccagtaa tcagggggaa gtgcgggcgg cagggcaagc gattttggca tatatcggtg
1261 ccaaagccag tgactgcatc aagcccaagg tggtgtctag tcaaattatt cgcaacatcg
1321 atgcctatca aacccagtta attaaccgta atcggcgggg ccatatgctg ttggcggggc
1381 aaaccctgtt tgtattggaa gtgcaaccgg cggcctatgc ttccctggcg gccaatgagg
1441 cggaaaagtc tgcctctatc aatattttgc aggttagttc catcggtagt tttggtcgct
1501 tacctgttta aactatcagt gtttgacagg atatattggc gggtaaacct aagagaaaag
1561 agcgtttatt agaataatcg gatatttaaa agggcgtgaa aaggtttatc cgttcgtcca
1621 tttgtatgtg ccaaccacag gaaccgtaaa aaggccgcgt tgctggcgtt tttccatagg
1681 ctccgccccc ctgacgagca tcacaaaaat cgacgctcaa gtcagaggtg gcgaaacccg
1741 acaggactat aaagatacca ggcgtttccc cctggaagct ccctcgtgcg ctctcctgtt
1801 ccgaccctgc cgcttaccgg atacctgtcc gcctttctcc cttcgggaag cgtggcgctt
1861 tctcatagct cacgctgtag gtatctcagt tcggtgtagg tcgttcgctc caagctgggc
1921 tgtgtgcacg aaccccccgt tcagcccgac cgctgcgcct tatccggtaa ctatcgtctt
1981 gagtccaacc cggtaagaca cgacttatcg ccactggcag cagccactgg taacaggatt
2041 agcagagcga ggtatgtagg cggtgctaca gagttcttga agtggtggcc taactacggc
2101 tacactagaa ggacagtatt tggtatctgc gctctgctga agccagttac cttcggaaaa
2161 agagttggta gctcttgatc cggcaaacaa accaccgctg gtagcggtgg tttttttgtt
2221 tgcaagcagc agattacgcg cagaaaaaaa ggatctcagg aagatccttt gatcttttct
2281 acggggtctg acgctcagtg gaacgaaaac tcacgttaag ggattttggt catgagatta
2341 tcaaaaagga tcttcaccta gatcctttta aattaaaaat gaagttttaa atcaatctaa
2401 agtatatatg agtaaacttg gtctgacagc taaaacaatt catccagtaa aatataatat
2461 tttattttct cccaatcagg cttgatcccc agtaagtcaa aaaatagctc gacatactgt
2521 tcttccccga tatcctccct gatcgaccgg acgcagaagg caatgtcata ccacttgtcc
2581 gccctgccgc ttctcccaag atcaataaag ccacttactt tgccatcttt cacaaagatg
2641 ttgctgtctc ccaggtcgcc gtgggaaaag acaagttcct cttcgggctt ttccgtcttt
2701 aaaaaatcat acagctcgcg cggatcttta aatggagtgt cctcttccca gttttcgcaa
2761 tccacatcgg ccagatcgtt attcagtaag taatccaatt cggctaagcg gctgtctaag
2821 ctattcgtat agggacaatc cgatatgtcg atggagtgaa agagcctgat gcactccgca
2881 tacagctcga taatcttttc agggctttgt tcatcttcat actcttccga gcaaaggacg
2941 ccatcggcct cactcatgag cagattgctc cagccatcat gccgttcaaa gtgcaggacc
3001 tttggaacag gcagctttcc ttccagccat agcatcatgt ccttttcccg ttccacatca
3061 taggtggtcc ctttataccg gctgtccgtc atttttaaat ataggttttc attttctccc
3121 accagcttat ataccttagc aggagacatt ccttccgtat cttttacgca gcggtatttt
3181 tcgatcagtt ttttcaattc cggtgatatt ctcattttag ccatactctt cctttttcaa
3241 tattattgaa gcatttatca gggttattgt ctcatgagcg gatacatatt tgaatgtatt
3301 tagaaaaata aacaaatagg ggttccgcgc acgaattggc cagcgctgcc atttttgggg
3361 tgaggccgtt cgcggccgag gggcgcagcc cctgggggga tgggagctcg gtgccttgat
3421 gtgggcgccg gcggtcgagt ggcgacggcg cggcttgtcc gcgccctggt agattgcctg
3481 gccgtaggcc agccattttt gagcggccag cggccgcgat aggccgacgc gaagcggcgg
3541 ggcgtaggga gcgcagcgac cgaagggtag gcgctttttg cagctcttcg gctgtgcgct
3601 ggccagacag ttatgcacag gccaggcggg ttttaagagt tttaataagt tttaaagagt
3661 tttaggcgga aaaatcgcct tttttctctt ttatatcagt cacttacatg tgtgaccggt
3721 tcccaatgta cggctttggg ttcccaatgt acgggttccg gttcccaatg tacggctttg
3781 ggttcccaat gtacgtgcta tccacaggaa agaagctttt tcgacctttt tcccctgcta
3841 gggcaatttg ccctagcatc tgctccgtac attaggaacc ggcggatgct tcgccctcga
3901 tcaggttgcg gtagcgcatg actaggatcg ggccagcctg ccccgcctcc tccttcaaat
3961 cgtactccgg caggtcattt gacccgatca gcttgcgcac ggtgaaacag aacttcttga
4021 actctccggc gctgccactg cgttcgtaga tcgtcttgaa caaccatctg gcttctgcct
4081 tgcctgcggc gcggcgtgcc aggcggtaga gaaaacggcc gatgccggga tcgatcaaaa
4141 agtaatcggg gtgaaccgtc agcacgtccg ggttcttgcc ttctgtgatc tcgcggtaca
4201 tccaatcagc tagctcgatc tcgatgtact ccggccgccc ggtttcgctc tttacgatct
4261 tgtagcggct aatcaaggct tcaccctcgg ataccgtcac caggcggccg ttcttggcct
4321 tcttcgtacg ctgcatggca acgtgcgtgg tgtttaaccg aatgcaggtt tctaccaggt
4381 cgtctttctg ctttccgcca tcggctcgcc ggcagaactt gagtacgtcc gcaacgtgtg
4441 gacggaacac gcggccgggc ttgtctccct tcccttcccg gtatcggttc atggattcgg
4501 ttagatggga aaccgccatc agtaccaggt cgtaatccca cacactggcc atgccggccg
4561 gccctgcgga aacctctacg tgcccgtctg gaagctcgta gcggatcacc tcgccagctc
4621 gtcggtcacg cttcgacaga cggaaaacgg ccacgtccat gatgctgcga ctatcgcggg
4681 tgcccacgtc atagagcatc ggaacgaaaa aatctggttg ctcgtcgccc ttgggcggct
4741 tcctaatcga cggcgcaccg gctgccggcg gttgccggga ttctttgcgg attcgatcag
4801 cggccgcttg ccacgattca ccggggcgtg cttctgcctc gatgcgttgc cgctgggcgg
4861 cctgcgcggc cttcaacttc tccaccaggt catcacccag cgccgcgccg atttgtaccg
4921 ggccggatgg tttgcgaccg tcacgccgat tcctcgggct tgggggttcc agtgccattg
4981 cagggccggc agacaaccca gccgcttacg cctggccaac cgcccgttcc tccacacatg
5041 gggcattcca cggcgtcggt gcctggttgt tcttgatttt ccatgccgcc tcctttagcc
5101 gctaaaattc atctactcat ttattcattt gctcatttac tctggtagct gcgcgatgta
5161 ttcagatagc agctcggtaa tggtcttgcc ttggcgtacc gcgtacatct tcagcttggt
5221 gtgatcctcc gccggcaact gaaagttgac ccgcttcatg gctggcgtgt ctgccaggct
5281 ggccaacgtt gcagccttgc tgctgcgtgc gctcggacgg ccggcactta gcgtgtttgt
5341 gcttttgctc attttctctt tacctcatta actcaaatga gttttgattt aatttcagcg
5401 gccagcgcct ggacctcgcg ggcagcgtcg ccctcgggtt ctgattcaag aacggttgtg
5461 ccggcggcgg cagtgcctgg gtagctcacg cgctgcgtga tacgggactc aagaatgggc
5521 agctcgtacc cggccagcgc ctcggcaacc tcaccgccga tgcgcgtgcc tttgatcgcc
5581 cgcgacacga caaaggccgc ttgtagcctt ccatccgtga cctcaatgcg ctgcttaacc
5641 agctccacca ggtcggcggt ggcccatatg tcgtaagggc ttggctgcac cggaatcagc
5701 acgaagtcgg ctgccttgat cgcggacaca gccaagtccg ccgcctgggg cgctccgtcg
5761 atcactacga agtcgcgccg gccgatggcc ttcacgtcgc ggtcaatcgt cgggcggtcg
5821 atgccgacaa cggttagcgg ttgatcttcc cgcacggccg cccaatcgcg ggcactgccc
5881 tggggatcgg aatcgactaa cagaacatcg gccccggcga gttgcagggc gcgggctaga
5941 tgggttgcga tggtcgtctt gcctgacccg cctttctggt taagtacagc gataaccttc
6001 atgcgttccc cttgcgtatt tgtttattta ctcatcgcat catatacgca gcgaccgcat
6061 gacgcaagct gttttactca aatacacatc acctttttag acggcggcgc tcggtttctt
6121 cagcggccaa gctggccggc caggccgcca gcttggcatc agacaaaccg gccaggattt
6181 catgcagccg cacggctgat gggctgcctg tatcgagtgg tgattttgtg ccgagctgcc
6241 ggtcggggag ctgttggctg gctggtggca ggatatattg tggtgtaaac aaattgacgc
6301 ttagacaact taataacaca ttgcggacgt ttttaatgta ctggggtgga tgcagtgggc
6361 ccaggtagct aaccaaaatt ctcaaaacgg aagagttatt ggcgatcgaa gcccatcgca
6421 tgagtcccta ttcccagcgg gccaatgatg tctccgtggt attggatttg atgatccatg
6481 acattgacct gttgctggaa ttggtgggtt cggaagtggt taaactgtcc gccagtggca
6541 gtcgggcttc tgggtcagga tatttggatt atgtcaccgc tacgttaggc ttctcctccg
6601 gcattgtggc caccctcacc gccagtaagg tcacccatcg taaaattcgt tccatcgccg
6661 cccactgcaa aaattccctc accgaagcgg attttctcaa taacgaaatt ttgatccatc
6721 gccaaaccac cgctgattgg agcgcggact atggccaggt attgtatcgc caggatggtc
6781 taatcgaaaa ggtttacacc agtaatattg aacctctcca cgctgaatta gaacatttta
6841 ttcattgtgt taggggaggt gatcaaccct cagtgggggg agaacaggcc ctcaaggccc
6901 tgaagttagc cagtttaatt gaagaaatgg ccctggacag tcaggaatgg catggggggg
6961 aagttgtgac agaatatcaa gatgccaccc tggccctcag tgcgagtgtt taaatcaact
7021 taattaatgc aattattgcg agttcaaact cgataacttt gtgaaatatt actgttgaat
7081 taatctggaa ttccccatgg aaaaaacgac aattacaaga aagtaaaact tatgtcatct
7141 ataagcttcg tgtatattaa cttcctgtta caaagcttta caaaactctc attaatcctt
7201 tagactaagt ttagtcagtt ccaatctgaa catcgacaaa tacataagga attataacca
7261 aatggctgac cccaccaatc gagaccgtct tccttttgag cggaaatcaa aaaagaaaaa
7321 ggttgaaaaa aagccccctg cagtggtggc tccgagcact aaaaccagcg gagccaaaga
7381 taaaaagggc cgccgttcag cagacagtgg cattcccgcc gtggtgagcc aaaggatggt
7441 taaacgcatg gccctgttct ccggcattcc cactgggctg ggcatgttat cctttgtgct
7501 tttttatctt gttgtgagcc gggactggtt tgagattccc acctatgtgg tgttttcggt
7561 gagtctgctc ttttttggtc taggggtggt gggcttaagc tatggcattt tttccacctc
7621 ctgggaagat gagcctggca gtgtctgggg ctggccggaa tttcgcctca acctcagtcg
7681 taccatcgct gtctggcgca acgcccaaca aacggcccag gacaatggcg atcgttgaac
7741 aaaactcaga atttgtaaat tttcgttaac aaagttaaca attggtcaat aataattgcc
7801 cagtcctgtt ggtcaaaata atttcgttaa aattagcatt agcatcggct tttcgagtcc
7861 gcatttactg tcagaccttt agctaagctt ttaaccctcc ctgtcccaac ctatcgaata
7921 gaggaagttt gtc
//

## Sheet: pOErpaB_KanR
LOCUS pOErpaB_KanR 5091 bp DNA circular UNA 26-FEB-2025
DEFINITION .
ACCESSION urn.local...g-iv1eyg8
VERSION urn.local...g-iv1eyg8
KEYWORDS .
SOURCE
ORGANISM .
FEATURES Location/Qualifiers
misc_feature 1..500
/standard_name="slr0168 upstream region"
regulatory 501..700
/note="Geneious type: promoter"
/standard_name="rbcL promoter"
CDS 701..1405
/codon_start=1
/transl_table=1
/standard_name="rpaB coding sequence"
regulatory 1406..1505
/note="Geneious type: terminator"
/standard_name="rbcS terminator"
gene 1544..2751
/standard_name="KanR (nptI)"
misc_feature 2757..3256
/standard_name="slr0168 downstream region"
misc_feature 3257..5091
/standard_name="IMBB2.4‐pUC57‐mini vector backbone"
ORIGIN
1 aggcttctcc tccggcattg tggccaccct caccgccagt aaggtcaccc atcgtaaaat
61 tcgttccatc gccgcccact gcaaaaattc cctcaccgaa gcggattttc tcaataacga
121 aattttgatc catcgccaaa ccaccgctga ttggagcgcg gactatggcc aggtattgta
181 tcgccaggat ggtctaatcg aaaaggttta caccagtaat attgaacctc tccacgctga
241 attagaacat tttattcatt gtgttagggg aggtgatcaa ccctcagtgg ggggagaaca
301 ggccctcaag gccctgaagt tagccagttt aattgaagaa atggccctgg acagtcagga
361 atggcatggg ggggaagttg tgacagaata tcaagatgcc accctggccc tcagtgcgag
421 tgtttaaatc aacttaatta atgcaattat tgcgagttca aactcgataa ctttgtgaaa
481 tattactgtt gaattaatct cattgccata agtaaaggca tcccctgcgt gataagatta
541 ccttcagaaa acagatagtt gctgggttat cgcagatttt tctcgcaacc aaataactgt
601 aaataataac tgtctctggg gcgacggtag gctttatatt gccaaatttc gcccgtggga
661 gaaagctagg ctattcaatg tttatggagg actgacctag gtggtcgatg acgaggccag
721 catccgacgc atactggaaa cccgtttatc catgattggc tatgaagtgg tgaccgctgc
781 cgacggtgaa gaggcgatcg ccactttcca tgagagcgac cccgatttgg tggtgttgga
841 tgtgatgatg cccaagctgg acggctacgg cgtttgccaa gaactacgta aagaatcgga
901 cattcccatt attatgctta ccgccctggg ggatgtggcc gatcgcatta ccggtttgga
961 actgggggcc gatgattatg tggtgaagcc cttttccccc aaggaattgg aagctagaat
1021 ccggtccgtg ctacggcggg tggacaaaaa cggtatgccg ggcattccca gttcgggcgt
1081 gttgcaaatt gccaccattc gcattgatac caacaagcgt caagtgtata aaggggatga
1141 gcgcatccgc ctaacaggaa tggaatttag cctgttggaa ttgttggtga gtcgctccgg
1201 agagcccttt tcccgttcgg aaattctcca ggaagtgtgg ggctacaccc ccgaacgcca
1261 tgtggatacc agggtggtgg acgtgcatat ttcccgcctg cgggccaaac tagaggaaga
1321 ccccagcaat cccgaattaa ttcttactgc ccggggcacc ggttacctgt tccaacgcat
1381 tctggaaccg ggggaagaac cgtaagttac agttttggca attactaaaa aactgacttc
1441 aattcaatgt tagcccgctc ccgcgggttt tttgttgctt tttcacagtg actataggta
1501 atcaggaatt cgattgatcc gtcgacctgc aggggggggg gggaaagcca cgttgtgtct
1561 caaaatctct gatgttacat tgcacaagat aaaaatatat catcatgaac aataaaactg
1621 tctgcttaca taaacagtaa tacaaggggt gttatgagcc atattcaacg ggaaacgtct
1681 tgctcgaggc cgcgattaaa ttccaacatg gatgctgatt tatatgggta taaatgggct
1741 cgcgataatg tcgggcaatc aggtgcgaca atctatcgat tgtatgggaa gcccgatgcg
1801 ccagagttgt ttctgaaaca tggcaaaggt agcgttgcca atgatgttac agatgagatg
1861 gtcagactaa actggctgac ggaatttatg cctcttccga ccatcaagca ttttatccgt
1921 actcctgatg atgcatggtt actcaccact gcgatccccg ggaaaacagc attccaggta
1981 ttagaagaat atcctgattc aggtgaaaat attgttgatg cgctggcagt gttcctgcgc
2041 cggttgcatt cgattcctgt ttgtaattgt ccttttaaca gcgatcgcgt atttcgtctc
2101 gctcaggcgc aatcacgaat gaataacggt ttggttgatg cgagtgattt tgatgacgag
2161 cgtaatggct ggcctgttga acaagtctgg aaagaaatgc ataagctttt gccattctca
2221 ccggattcag tcgtcactca tggtgatttc tcacttgata accttatttt tgacgagggg
2281 aaattaatag gttgtattga tgttggacga gtcggaatcg cagaccgata ccaggatctt
2341 gccatcctat ggaactgcct cggtgagttt tctccttcat tacagaaacg gctttttcaa
2401 aaatatggta ttgataatcc tgatatgaat aaattgcagt ttcatttgat gctcgatgag
2461 tttttctaat cagaattggt taattggttg taacactggc agagcattac gctgacttga
2521 cgggacggcg gctttgttga ataaatcgaa cttttgctga gttgaaggat cagatcacgc
2581 atcttcccga caacgcagac cgttccgtgg caaagcaaaa gttcaaaatc accaactggt
2641 ccacctacaa caaagctctc atcaaccgtg gctccctcac tttctggctg gatgatgggg
2701 cgattcaggc ctggtatgag tcagcaacac cttcttcacg aggcagacct cagcgcctca
2761 ggggcattat cggagcaagc cgatattcag gtaagatggg gcggtgcttt tgtgggttga
2821 tccattagct ttaaccccat tgtctccact gacggtaata gttttcccca ctgcgattaa
2881 ttgttttgtt tggaggaggg actgccccac cgtcagcccg ccgccatagt tttgcatttc
2941 cactgccatg ggcatcgaac tccgtagtta cgtttacctg gatagtctcc agtcccaaca
3001 tgcagcctac attgggacgg tggcctccgg ctttttgccg ctaccggggg attgttccct
3061 ctgggtggaa gtttccccag gcattgaaat taaccgcatt accgatattg ctcttaaggc
3121 agcggtggtg cggccggggg tattatttgt ggaacggctc tacggtttgt tggaaatcca
3181 tgccagtaat cagggggaag tgcgggcggc agggcaagcg attttggcat atatcggtgc
3241 caaagccagt gactgcccaa tgatatcgga aagaacatgt gagcaaaagg ccagcaaaag
3301 gccaggaacc gtaaaaaggc cgcgttgctg gcgtttttcc ataggctccg cccccctgac
3361 gagcatcaca aaaatcgacg ctcaagtcag aggtggcgaa acccgacagg actataaaga
3421 taccaggcgt ttccccctgg aagctccctc gtgcgctctc ctgttccgac cctgccgctt
3481 accggatacc tgtccgcctt tctcccttcg ggaagcgtgg cgctttctca tagctcacgc
3541 tgtaggtatc tcagttcggt gtaggtcgtt cgctccaagc tgggctgtgt gcacgaaccc
3601 cccgttcagc ccgaccgctg cgccttatcc ggtaactatc gtcttgagtc caacccggta
3661 agacacgact tatcgccact ggcagcagcc actggtaaca ggattagcag agcgaggtat
3721 gtaggcggtg ctacagagtt cttgaagtgg tggcctaact acggctacac tagaagaaca
3781 gtatttggta tctgcgctct gctgaagcca gttaccttcg gaaaaagagt tggtagctct
3841 tgatccggca aacaaaccac cgctggtagc ggtggttttt ttgtttgcaa gcagcagatt
3901 acgcgcagaa aaaaaggatc tcaagaagat cctttgatct tttctacggg gtctgacgct
3961 cagtggaacg aaaactcacg ttaagggatt ttggtcatga gattatcaaa aaggatcttc
4021 acctagatcc ttttaaatta aaaatgaagt tttaaatcaa tctaaagtat atatgagtaa
4081 acttggtctg acagttacca atgcttaatc agtgaggcac ctatctcagc gatctgtcta
4141 tttcgttcat ccatagttgc ctgactcccc gtcgtgtaga taactacgat acgggagggc
4201 ttaccatctg gccccagtgc tgcaatgata ccgcgagacc cacgctcacc ggctccagat
4261 ttatcagcaa taaaccagcc agccggaagg gccgagcgca gaagtggtcc tgcaacttta
4321 tccgcctcca tccagtctat taattgttgc cgggaagcta gagtaagtag ttcgccagtt
4381 aatagtttgc gcaacgttgt tgccattgct acaggcatcg tggtgtcacg ctcgtcgttt
4441 ggtatggctt cattcagctc cggttcccaa cgatcaaggc gagttacatg atcccccatg
4501 ttgtgcaaaa aagcggttag ctccttcggt cctccgatcg ttgtcagaag taagttggcc
4561 gcagtgttat cactcatggt tatggcagca ctgcataatt ctcttactgt catgccatcc
4621 gtaagatgct tttctgtgac tggtgagtac tcaaccaagt cattctgaga atagtgtatg
4681 cggcgaccga gttgctcttg cccggcgtca atacgggata ataccgcgcc acatagcaga
4741 actttaaaag tgctcatcat tggaaaacgt tcttcggggc gaaaactctc aaggatctta
4801 ccgctgttga gatccagttc gatgtaaccc actcgtgcac ccaactgatc ttcagcatct
4861 tttactttca ccagcgtttc tgggtgagca aaaacaggaa ggcaaaatgc cgcaaaaaag
4921 ggaataaggg cgacacggaa atgttgaata ctcatactct tcctttttca atattattga
4981 agcatttatc agggttattg tctcatgagc ggatacatat ttgaatgtat ttagaaaaat
5041 aaacaaatag gggttccgcg cacatttccc cgaaaagtgc cacctgacgt c
//

## Sheet: Atpam68 sequence
PAM68/AT4G19100.1/ without cTP/Codon optimization (Synechococcus) / 543 bp
ATGGACAAAACCAAAAGCCAGGTGCCGAAAAGCATTACCTGCATCAACCGCCTGGAAATCAGCCGCATTGCTCCGCTGCACGCCACCATGAACAGCCCCAAAGGCTTTGGCCCTCCGCCTAAAAAGACCAAAAAGAGCAAGAAACCCAAACCTGGCAACCAGAGTGATGAAGATGATGATGACGAAGATGAGGACGATGACGACGAGGAAGATGAACGCGAACGCGGTGTGATCCCCGAAATCGTGACCAACCGCATGATTAGCCGCATGGGCTTTACCGTGGGCCTGCCGCTGTTTATCGGCCTGCTGTTTTTCCCGTTTTTCTACTACCTGAAAGTGGGCCTGAAAGTCGATGTGCCCACCTGGGTGCCCTTTATCGTGAGCTTTGTGTTCTTTGGC…
