# Supplementary material
Source: Research Square preprint supplement (doi:10.21203/rs.3.rs-6305715/v1)
Supplement: Supplementary file 4 [file 751472accc4c1c16b2df4373.xlsx]

## Sheet: description
Supplemental Data 2. Mutations in FL-tolerant strains.
Refers to main text and Extended Data Fig. 1
abbreviation	meaning
gene/gene	deletion in the intergenic region
gene–[gene]	deletion affecting coding region(s), with the affected gene(s) highlighted by “[]”
INDEL	insertion/deletion affecting coding regions
LT_final	LT_initial at the end of FL-ALE
LT_initial	non-motile Synechocystis PCC 6803 laboratory-type strain (Dann et al., 2021)
M	metabolic processes
NC	non-coding
NON	non-synonymous
P	photosynthesis
STOP	premature stop codon
SYN	synonymous
Tc	transcription
Tl	translation
total F	sum of allele frequency across the 24 samples
Tp	transposon/transposase
WT	original motile Synechocystis PCC 6803 wild-type strain from the Pasteur collection
F=1?	fully segregated in at least one sample
total F	sum of allele frequency across the 24 samples
?	unknown function
F=1?	fully segregated in at least one sample

## Sheet: average coverage
	Mean Coverage
Strain	chromosome	pSYSA	pSYSG	pSYSM	pSYSX
FL0_1	307.9	256.6	114.9	482.1	275.5
FL0_2	324.1	251.2	98.3	578.4	568.9
FL0_3	305.3	259	103.9	598.7	581.1
FL0_4	325	273	93	629	613.3
FL0_5	334.7	316.6	116	657.4	641.2
FL0_6	331.6	324.1	137.1	662.8	633.8
FL0_7	301	229	120.4	596	579
FL0_8	381.6	424.4	186	806.9	782
FL0_9	340.6	263.1	61.1	687.2	671.1
FL0_10	350.8	299.6	85.5	688.6	674.6
FL0_11	356.4	355.3	85.1	742.2	740.4
FL0_12	271.9	221.4	71.3	502.5	498.1
FL+_1	288.3	233.1	52.8	611.5	598.4
FL+_2	392.1	249.4	96.4	562.9	558.8
FL+_3	420.8	399.3	233.9	873.9	856.2
FL+_4	237.8	263.9	135.8	537.5	521.1
FL+_5	331.8	367.8	126.1	735	725.7
FL+_6	409.6	366.7	135.9	713.8	287.1
FL+_7	327.6	381.6	188.4	580.2	257.3
FL+_8	340	305.7	136.6	636.7	616.8
FL+_9	373.8	397.2	117.9	1018.2	997.1
FL+_10	398.5	270	119.5	588.4	568.3
FL+_11	328.6	180.8	76.5	403.9	140.8
FL+_12	360.6	321	110.8	427.9	468.8

## Sheet: all polymorphisms
genomic entity	position	mutation	annotation	locus	mut type	function	in FL0	in FL+	WT	LT_initial	LT_final	FL0_1	FL0_2	FL0_3	FL0_4	FL0_5	FL0_6	FL0_7	FL0_8	FL0_9	FL0_10	FL0_11	FL0_12	FL+_13	FL+_14	FL+_15	FL+_16	FL+_17	FL+_18	FL+_19	FL+_20	FL+_21	FL+_22	FL+_23	FL+_24
pSYSX	3282	C→T	intergenic (+229/‑223)	slr6001 → / → ssr6002	NC	two‑component hybrid sensor and regulator/ORF_ID:ssr6002	YES	NO				1
pSYSG	4849	C→A	D400Y (GAT→TAT)	sll8006 ←	NON	type I restriction‑modification system S subunit	YES	NO													0.051
pSYSA	6306	A→G	intergenic (‑22/‑43)	sll7009 ← / → slr7010	NC	unknown protein/unknown protein	NO	YES																1
pSYSM	7523	T→G	L1666V (TTG→GTG)	slr5005 →	NON	ORF_ID:slr5005; hypothetical protein	YES	YES		0.081	0.065		0.076		0.059		0.065		0.053			0.055			0.055										0.064
pSYSA	11123	C→T	L865F (CTT→TTT)	slr7011 →	NON	unknown protein	NO	NO	1
pSYSG	11474	G→T	K159N (AAG→AAT)	slr8016 →	NON	plasmid partitioning protein	YES	NO					0.118
pSYSG	11608	A→C	H204P (CAC→CCC)	slr8016 →	NON	plasmid partitioning protein	NO	YES			0.139															0.184									0.169
pSYSG	11610	A→C	M205L (ATG→CTG)	slr8016 →	NON	plasmid partitioning protein	YES	YES	0.093		0.132		0.124		0.121		0.16								0.178	0.234	0.106			0.123					0.246
pSYSG	11611	T→G	M205R (ATG→AGG)	slr8016 →	NON	plasmid partitioning protein	YES	YES	0.203		0.216	0.185	0.215	0.189	0.237	0.248	0.184		0.131		0.264				0.151	0.222	0.183			0.238	0.225	0.2
pSYSG	11613	T→G	C206G (TGC→GGC)	slr8016 →	NON	plasmid partitioning protein	YES	YES			0.124			0.136	0.133		0.113									0.173	0.125	0.179							0.136
pSYSA	14283	A→T	Y21F (TAC→TTC)	slr7015 →	NON	ORF_ID:slr7015; hypothetical protein	NO	YES																											0.058
pSYSA	14360	G→T	E47* (GAA→TAA)	slr7015 →	STOP	ORF_ID:slr7015; hypothetical protein	YES	NO														0.058
pSYSM	14430	C→G	intergenic (+509/+149)	slr5005 → / ← sll5006	NC	ORF_ID:slr5005; hypothetical protein/unknown protein	YES	YES	0.164	0.095	0.071	0.074	0.082	0.096	0.111	0.079	0.088	0.089	0.071	0.089	0.108	0.102	0.083	0.084	0.074	0.101	0.081	0.113		0.051	0.084	0.1	0.065		0.091
pSYSM	14438	G→A	intergenic (+517/+141)	slr5005 → / ← sll5006	NC	ORF_ID:slr5005; hypothetical protein/unknown protein	YES	YES	0.172	0.121	0.09	0.101	0.105	0.119	0.132	0.1	0.102	0.095	0.075	0.113	0.117	0.115	0.093	0.097	0.094	0.122	0.1	0.147		0.064	0.109	0.112	0.083		0.107
pSYSM	14439	A→G	intergenic (+518/+140)	slr5005 → / ← sll5006	NC	ORF_ID:slr5005; hypothetical protein/unknown protein	YES	YES	0.168	0.122	0.09	0.101	0.105	0.119	0.133	0.101	0.101	0.096	0.076	0.114	0.118	0.114	0.094	0.095	0.094	0.123	0.099	0.147		0.062	0.107	0.112	0.084		0.107
pSYSM	14478	T→C	intergenic (+557/+101)	slr5005 → / ← sll5006	NC	ORF_ID:slr5005; hypothetical protein/unknown protein	YES	YES	0.302	0.272	0.231	0.19	0.251	0.295	0.265	0.26	0.218	0.208	0.218	0.245	0.257	0.244	0.275	0.248	0.246	0.274	0.222	0.304	0.11	0.131	0.227	0.241	0.208	0.107	0.252
pSYSM	14487	G→A	intergenic (+566/+92)	slr5005 → / ← sll5006	NC	ORF_ID:slr5005; hypothetical protein/unknown protein	YES	YES	0.302	0.274	0.24	0.212	0.254	0.299	0.269	0.263	0.225	0.212	0.225	0.253	0.262	0.246	0.284	0.251	0.251	0.279	0.23	0.308	0.112	0.132	0.239	0.245	0.218	0.117	0.256
pSYSM	14507	G→A	intergenic (+586/+72)	slr5005 → / ← sll5006	NC	ORF_ID:slr5005; hypothetical protein/unknown protein	YES	YES	0.308	0.279	0.238	0.209	0.254	0.29	0.272	0.261	0.22	0.215	0.228	0.246	0.27	0.245	0.295	0.25	0.258	0.278	0.23	0.309	0.116	0.138	0.242	0.243	0.232	0.116	0.253
pSYSM	14508	C→T	intergenic (+587/+71)	slr5005 → / ← sll5006	NC	ORF_ID:slr5005; hypothetical protein/unknown protein	YES	YES	0.314	0.281	0.241	0.212	0.257	0.293	0.275	0.264	0.221	0.22	0.23	0.249	0.271	0.249	0.297	0.253	0.26	0.278	0.231	0.311	0.117	0.14	0.242	0.246	0.233	0.117	0.256
pSYSM	14535	Δ1 bp	intergenic (+614/+44)	slr5005 → / ← sll5006	NC	ORF_ID:slr5005; hypothetical protein/unknown protein	YES	YES	0.296	0.271	0.23	0.213	0.261	0.283	0.273	0.261	0.213	0.214	0.228	0.248	0.26	0.246	0.283	0.247	0.253	0.276	0.232	0.294	0.112	0.128	0.235	0.242	0.238	0.113	0.25
pSYSM	14544	G→A	intergenic (+623/+35)	slr5005 → / ← sll5006	NC	ORF_ID:slr5005; hypothetical protein/unknown protein	YES	YES	0.31	0.282	0.245	0.219	0.266	0.292	0.284	0.276	0.228	0.224	0.247	0.262	0.279	0.252	0.303	0.262	0.272	0.287	0.241	0.3	0.12	0.136	0.246	0.258	0.256	0.121	0.262
pSYSM	14548	G→A	intergenic (+627/+31)	slr5005 → / ← sll5006	NC	ORF_ID:slr5005; hypothetical protein/unknown protein	YES	YES	0.309	0.282	0.244	0.22	0.265	0.291	0.283	0.276	0.228	0.224	0.245	0.259	0.274	0.251	0.303	0.259	0.273	0.285	0.24	0.3	0.119	0.136	0.244	0.259	0.256	0.121	0.261
pSYSM	14565	T→C	intergenic (+644/+14)	slr5005 → / ← sll5006	NC	ORF_ID:slr5005; hypothetical protein/unknown protein	YES	YES	0.245	0.253	0.207	0.174	0.226	0.251	0.227	0.236	0.197	0.181	0.215	0.226	0.229	0.209	0.258	0.224	0.243	0.247	0.204	0.269	0.105	0.106	0.208	0.228	0.24	0.114	0.215
pSYSM	14573	T→C	intergenic (+652/+6)	slr5005 → / ← sll5006	NC	ORF_ID:slr5005; hypothetical protein/unknown protein	YES	YES	0.197	0.221	0.193	0.154	0.196	0.219	0.19	0.21	0.163	0.154	0.182	0.188	0.195	0.176	0.224	0.191	0.209	0.214	0.165	0.229	0.084	0.087	0.178	0.191	0.205	0.1	0.187
pSYSM	14592	G→T	P181Q (CCA→CAA)	sll5006 ←	NON	unknown protein	YES	YES	0.182	0.167	0.137	0.098	0.162	0.16	0.136	0.13	0.129	0.116	0.125	0.148	0.158	0.138	0.163	0.151	0.195	0.146	0.131	0.187	0.073		0.13	0.142	0.162	0.05	0.137
pSYSM	14627	C→T	K169K (AAG→AAA)	sll5006 ←	SYN	unknown protein	YES	YES	0.161	0.143	0.134	0.109	0.154	0.147	0.123	0.15	0.127	0.138	0.131	0.151	0.164	0.128	0.133	0.118	0.172	0.107	0.124	0.134	0.084	0.062	0.169	0.137	0.163	0.059	0.128
pSYSM	14732	G→A	P134P (CCC→CCT)	sll5006 ←	SYN	unknown protein	YES	YES	0.128	0.101	0.104	0.079	0.132	0.101	0.097	0.129	0.09	0.11	0.089	0.099	0.116	0.09	0.09	0.101	0.11	0.076	0.081	0.087	0.067	0.052	0.125	0.088	0.121		0.11
pSYSM	14744	G→C	I130M (ATC→ATG)	sll5006 ←	NON	unknown protein	YES	YES	0.058	0.056	0.076		0.077		0.051	0.067		0.055			0.063		0.054	0.055	0.077	0.057					0.064	0.052	0.085		0.064
pSYSM	16575	T→C	intergenic (+340/‑28)	ssr5009 → / → slr5010	NC	unknown protein/ORF_ID:slr5010; integrase/recombinase	YES	YES		0.427	0.388	0.42	0.413	0.392	0.401	0.381	0.432	0.402	0.399	0.409	0.401	0.401	0.327	0.435	0.402	0.401	0.397	0.407	0.421	0.398	0.373	0.389	0.413	0.329	0.362
pSYSM	16592	T→C	intergenic (+357/‑11)	ssr5009 → / → slr5010	NC	unknown protein/ORF_ID:slr5010; integrase/recombinase	YES	YES		0.383	0.41	0.384	0.371	0.389	0.406	0.423	0.369	0.375	0.4	0.356	0.411	0.403	0.484	0.358	0.42	0.396	0.388	0.36	0.381	0.396	0.419	0.401	0.399	0.433	0.377
pSYSM	16593	G→A	intergenic (+358/‑10)	ssr5009 → / → slr5010	NC	unknown protein/ORF_ID:slr5010; integrase/recombinase	YES	YES		0.378	0.401	0.384	0.371	0.381	0.4	0.413	0.366	0.367	0.391	0.353	0.407	0.398	0.476	0.346	0.411	0.396	0.386	0.36	0.379	0.393	0.413	0.397	0.389	0.426	0.373
pSYSM	16594	A→T	intergenic (+359/‑9)	ssr5009 → / → slr5010	NC	unknown protein/ORF_ID:slr5010; integrase/recombinase	YES	YES		0.375	0.398	0.377	0.367	0.378	0.393	0.405	0.36	0.365	0.384	0.348	0.407	0.387	0.471	0.346	0.408	0.392	0.383	0.356	0.375	0.388	0.402	0.394	0.384	0.418	0.366
pSYSM	16595	A→T	intergenic (+360/‑8)	ssr5009 → / → slr5010	NC	unknown protein/ORF_ID:slr5010; integrase/recombinase	YES	YES		0.374	0.401	0.382	0.365	0.379	0.401	0.407	0.365	0.36	0.384	0.346	0.412	0.392	0.471	0.346	0.41	0.393	0.383	0.358	0.377	0.39	0.408	0.395	0.386	0.422	0.366
pSYSA	17222	Δ935 bp	Δ935 bp	ssr7018–[ssl7019]	INDEL	ssr7018, [ssl7019]	YES	YES							1	1		1				1		1										1
pSYSM	17613	C→A	intergenic (+174/‑267)	ssr5011 → / → slr5012	NC	ORF_ID:ssr5011; hypothetical protein/ORF_ID:slr5012; hypothetical protein	NO	YES																						0.088
pSYSM	17623	C→A	intergenic (+184/‑257)	ssr5011 → / → slr5012	NC	ORF_ID:ssr5011; hypothetical protein/ORF_ID:slr5012; hypothetical protein	NO	YES																		0.057						0.055
pSYSM	17647	G→T	intergenic (+208/‑233)	ssr5011 → / → slr5012	NC	ORF_ID:ssr5011; hypothetical protein/ORF_ID:slr5012; hypothetical protein	YES	YES						0.056																			0.05
pSYSM	17656	C→A	intergenic (+217/‑224)	ssr5011 → / → slr5012	NC	ORF_ID:ssr5011; hypothetical protein/ORF_ID:slr5012; hypothetical protein	YES	YES						0.093			0.056			0.058		0.05						0.066				0.069	0.055
pSYSM	17668	C→A	intergenic (+229/‑212)	ssr5011 → / → slr5012	NC	ORF_ID:ssr5011; hypothetical protein/ORF_ID:slr5012; hypothetical protein	YES	YES											0.059							0.078		0.054
pSYSM	18456	G→T	G193* (GGA→TGA)	slr5012 →	STOP	ORF_ID:slr5012; hypothetical protein	NO	YES																								0.05
pSYSA	18557	A→T	intergenic (‑244/+532)	ssl7019 ← / ← ssl7020	NC	unknown protein/unknown protein	NO	NO		0.059
pSYSA	18985	T→G	intergenic (‑672/+104)	ssl7019 ← / ← ssl7020	NC	unknown protein/unknown protein	NO	YES																											0.057
pSYSG	20504	G→T	G189G (GGG→GGT)	slr8023 →	SYN	ORF_ID:slr8023; probable esterase	NO	YES																0.085
pSYSA	21171	G→T	V302V (GTG→GTT)	slr7023 →	SYN	ORF_ID:slr7023; hypothetical protein	YES	NO						0.055
pSYSA	21195	A→G	V310V (GTA→GTG)	slr7023 →	SYN	ORF_ID:slr7023; hypothetical protein	YES	NO						0.119
pSYSA	21198	G→T	E311D (GAG→GAT)	slr7023 →	NON	ORF_ID:slr7023; hypothetical protein	YES	NO						0.143
pSYSA	21260	C→T	P332L (CCA→CTA)	slr7023 →	NON	ORF_ID:slr7023; hypothetical protein	YES	NO						0.237
pSYSA	21261	A→G	P332P (CCA→CCG)	slr7023 →	SYN	ORF_ID:slr7023; hypothetical protein	YES	NO						0.251
pSYSA	21273	G→A	V336V (GTG→GTA)	slr7023 →	SYN	ORF_ID:slr7023; hypothetical protein	YES	NO						0.198
pSYSA	21276	T→G	D337E (GAT→GAG)	slr7023 →	NON	ORF_ID:slr7023; hypothetical protein	YES	NO						0.208
pSYSA	21809	C→T	S515L (TCG→TTG)	slr7023 →	NON	ORF_ID:slr7023; hypothetical protein	NO	YES																		0.059				0.06
pSYSA	21815	C→T	P517L (CCG→CTG)	slr7023 →	NON	ORF_ID:slr7023; hypothetical protein	NO	YES																		0.067				0.061
pSYSM	21918	T→G	L26V (TTG→GTG)	slr5016 →	NON	unknown protein	YES	YES		0.143										0.11				0.12				0.081
pSYSM	21945	C→A	R35S (CGT→AGT)	slr5016 →	NON	unknown protein	NO	NO		0.058
chromosome	24168	C→A	G326V (GGT→GTT)	sll1202 ←	NON	ORF_ID:sll1202; unknown protein	NO	YES																									0.06
pSYSX	24257	3 bp→AAA	intergenic (‑147/‑4)	ssl6023 ← / → ssr6024	NC	ORF_ID:ssl6023/ORF_ID:ssr6024	NO	NO	1
pSYSX	24261	2 bp→TT	intergenic (‑151/‑1)	ssl6023 ← / → ssr6024	NC	ORF_ID:ssl6023/ORF_ID:ssr6024	NO	NO	1
pSYSX	24268	T→C	T2T (ACT→ACC)	ssr6024 →	SYN	ORF_ID:ssr6024	NO	NO	1
pSYSX	24280	C→A	A6A (GCC→GCA)	ssr6024 →	SYN	ORF_ID:ssr6024	NO	NO	1
pSYSX	24317	A→G	K19E (AAA→GAA)	ssr6024 →	NON	ORF_ID:ssr6024	NO	NO	1
pSYSG	24983	G→T	intergenic (+122/‑164)	slr8029 → / → slr8030	NC	resolvase/ORF_ID:slr8030; hypothetical protein	NO	YES																					0.052
pSYSG	25218	G→A	R24R (CGG→CGA)	slr8030 →	SYN	ORF_ID:slr8030; hypothetical protein	YES	NO												0.059
pSYSX	26176	A→G	Q27Q (CAA→CAG)	slr6028 →	SYN	ORF_ID:slr6028	NO	NO		0.062
pSYSG	27416	C→A	T199T (ACG→ACT)	ndhK2 ←	SYN	NADH dehydrogenase subunit	YES	NO												0.08
pSYSM	32039	A→C	I215L (ATC→CTC)	slr5029 →	NON	transposase	YES	YES		0.078												0.094			0.078							0.102	0.085
pSYSX	36134	A→G	G23G (GGA→GGG)	slr6041 →	SYN	two‑component sensor histidine kinase	YES	YES		0.121	0.128	0.205	0.176	0.195	0.197	0.196	0.193	0.194	0.165	0.17	0.181	0.179	0.168	0.181	0.214	0.151	0.193	0.169	0.214	0.202	0.191	0.146	0.2	0.209	0.231
pSYSX	36137	T→A	L24L (CTT→CTA)	slr6041 →	SYN	two‑component sensor histidine kinase	YES	YES		0.123	0.13	0.206	0.177	0.197	0.194	0.198	0.191	0.194	0.167	0.169	0.186	0.179	0.168	0.179	0.213	0.15	0.19	0.169	0.216	0.204	0.195	0.146	0.199	0.207	0.232
pSYSG	36173	A→C	K1159T (AAG→ACG)	slr8038 →	NON	WD‑repeat protein	NO	YES																		0.103
pSYSM	36671	T→G	Y63* (TAT→TAG)	slr5037 →	STOP	ORF_ID:slr5037; hypothetical protein	NO	NO			0.052
pSYSA	37628	T→G	S171R (AGT→CGT)	sll7043 ←	NON	unknown protein	NO	YES																						0.08
pSYSA	38377	T→G	L112F (TTA→TTC)	sll7044 ←	NON	ORF_ID:sll7044; plasmid partition protein ParA homolog	YES	NO			0.081				0.095
pSYSM	39206	G→C	G71G (GGG→GGC)	slr5040 →	SYN	transposase	NO	YES																								1
chromosome	44341	G→T	A257A (GCG→GCT)	fecB →	SYN	iron(III) dicitrate‑binding periplasmic protein	NO	YES																								0.08
pSYSM	44691	G→T	R389S (CGC→AGC)	sll5047 ←	NON	unknown protein	YES	NO														0.063
pSYSM	44704	A→C	V384V (GTT→GTG)	sll5047 ←	SYN	unknown protein	YES	YES		0.064						0.087		0.073	0.098	0.075		0.07					0.111					0.092
pSYSA	49334	A→G	N182S (AAC→AGC)	slr7059 →	NON	ORF_ID:slr7059; hypothetical protein	NO	YES																								0.721
chromosome	54319	A→C	intergenic (‑192/‑214)	sll1396 ← / → hypD	NC	ORF_ID:sll1396; unknown protein/hydrogenase isoenzymes formation protein; HypD	NO	NO		0.084
pSYSX	56839	A→T	intergenic (‑8/+294)	sll6059 ← / ← sll6060	NC	ORF_ID:sll6059; putative integrase/recombinase/ORF_ID:sll6060; probable acetyltransferase	YES	YES		0.4	0.346	0.384	0.467	0.429	0.421	0.412	0.446	0.377	0.415	0.429	0.382	0.418	0.431	0.393	0.374	0.461	0.383	0.37	0.423	0.364	0.405	0.461	0.461	0.409	0.345
pSYSX	56840	A→T	intergenic (‑9/+293)	sll6059 ← / ← sll6060	NC	ORF_ID:sll6059; putative integrase/recombinase/ORF_ID:sll6060; probable acetyltransferase	YES	YES		0.414	0.363	0.401	0.477	0.442	0.432	0.422	0.466	0.392	0.425	0.444	0.398	0.428	0.451	0.405	0.388	0.483	0.404	0.383	0.437	0.375	0.421	0.475	0.48	0.431	0.362
pSYSX	56841	T→C	intergenic (‑10/+292)	sll6059 ← / ← sll6060	NC	ORF_ID:sll6059; putative integrase/recombinase/ORF_ID:sll6060; probable acetyltransferase	YES	YES		0.416	0.364	0.403	0.475	0.445	0.435	0.425	0.468	0.396	0.43	0.448	0.399	0.429	0.454	0.407	0.392	0.486	0.41	0.391	0.442	0.379	0.423	0.479	0.487	0.435	0.363
pSYSX	56842	G→A	intergenic (‑11/+291)	sll6059 ← / ← sll6060	NC	ORF_ID:sll6059; putative integrase/recombinase/ORF_ID:sll6060; probable acetyltransferase	YES	YES		0.418	0.365	0.403	0.48	0.446	0.435	0.425	0.468	0.397	0.43	0.448	0.399	0.431	0.454	0.413	0.39	0.488	0.41	0.391	0.442	0.38	0.427	0.479	0.493	0.433	0.363
pSYSX	56859	G→A	intergenic (‑28/+274)	sll6059 ← / ← sll6060	NC	ORF_ID:sll6059; putative integrase/recombinase/ORF_ID:sll6060; probable acetyltransferase	YES	YES		0.383	0.446	0.377	0.31	0.344	0.374	0.349	0.332	0.402	0.356	0.357	0.349	0.383	0.34	0.362	0.395	0.326	0.359	0.388	0.338	0.393	0.36	0.339	0.329	0.374	0.446
pSYSM	56860	A→C	A316A (GCT→GCG)	sll5057 ←	SYN	ORF_ID:sll5057; probable glycosyltransferase	NO	YES																		0.051
pSYSM	56871	G→T	R313S (CGT→AGT)	sll5057 ←	NON	ORF_ID:sll5057; probable glycosyltransferase	YES	YES											0.062													0.069
pSYSX	58084	T→C	intergenic (‑178/‑138)	ssl6061 ← / → ssr6062	NC	ORF_ID:ssl6061/ORF_ID:ssr6062	YES	YES		0.495	0.532	0.359	0.516	0.47	0.439	0.473	0.474	0.475	0.449	0.478	0.492	0.477	0.479	0.481	0.454	0.477	0.499	0.476	0.248	0.304	0.474	0.447	0.472	0.278	0.485
pSYSM	62712	T→G	K707T (AAA→ACA)	sll5060 ←	NON	two‑component hybrid sensor and regulator	YES	YES				0.053						0.06													0.051	0.06
pSYSA	67136	C→G	A281P (GCC→CCC)	sll7075 ←	NON	unknown protein	YES	YES	0.066		0.055				0.078											0.051				0.067					0.07
pSYSM	67884	T→A	K31N (AAA→AAT)	sll5066 ←	NON	ORF_ID:sll5066; probable plasmid partitioning protein, ParA family	NO	YES																						0.061
pSYSA	68609	191 bp→41 bp	intergenic (‑633/‑580)	sll7075 ← / → slr7076	NC	unknown protein/ORF_ID:slr7076; hypothetical protein	NO	YES																										1
pSYSA	68609	Δ77 bp	intergenic (‑633/‑694)	sll7075 ← / → slr7076	NC	unknown protein/ORF_ID:slr7076; hypothetical protein	YES	YES				1	1	1	1	1	1	1	1	1	1	1	1	1	1	1	1	1	1	1	1	1	1		1
pSYSA	70438	Δ75 bp	intergenic (+670/+2366)	slr7076 → / ← sll7077	NC	ORF_ID:slr7076; hypothetical protein/ORF_ID:sll7077; hypothetical protein	NO	YES																1
pSYSA	70740	Δ77 bp	intergenic (+972/+2062)	slr7076 → / ← sll7077	NC	ORF_ID:slr7076; hypothetical protein/ORF_ID:sll7077; hypothetical protein	YES	YES				1	1	1	1	1	1	1	1	1	1	1	1	1	1		1	1	1	1	1	1	1	1	1
pSYSA	72086	Δ150 bp	intergenic (+2318/+643)	slr7076 → / ← sll7077	NC	ORF_ID:slr7076; hypothetical protein/ORF_ID:sll7077; hypothetical protein	YES	YES				1	1	1	1	1	1	1	1	1	1	1	1	1	1	1	1	1	1	1	1	1	1	1	1
chromosome	77107	A→C	Y101D (TAT→GAT)	dapB ←	NON	dihydrodipicolinate reductase	YES	NO											0.053
chromosome	81392	A→C	K152T (AAG→ACG)	slr1122 →	NON	ORF_ID:slr1122; unknown protein	NO	NO			0.063
chromosome	81579	C→A	G214G (GGC→GGA)	slr1122 →	SYN	ORF_ID:slr1122; unknown protein	NO	YES																				0.068
chromosome	81633	C→A	V232V (GTC→GTA)	slr1122 →	SYN	ORF_ID:slr1122; unknown protein	YES	NO						0.06
pSYSX	82357	2 bp→TG	coding (62‑63/219 nt)	ssr6089 →	INDEL	ORF_ID:ssr6089	YES	YES	1	1	1	1	1	1	1	1	1	1	1	1	1	1	1	1	1	1	1	1	1	1	1	1	1	1	1
pSYSX	82405	A→G	N37S (AAC→AGC)	ssr6089 →	NON	ORF_ID:ssr6089	YES	YES	1	1	1	1	1	1	1	1	1	1	1	1	1	1	1	1	1	1	1	1	1	1	1	1	1	1	1
chromosome	83741	T→G	K38T (AAA→ACA)	sll1053 ←	NON	ORF_ID:sll1053; hypothetical protein	YES	YES				0.071							0.079	0.092						0.057	0.06		0.065		0.061		0.057
chromosome	83746	T→G	P36P (CCA→CCC)	sll1053 ←	SYN	ORF_ID:sll1053; hypothetical protein	NO	NO		0.154
chromosome	83758	T→G	Q32H (CAA→CAC)	sll1053 ←	NON	ORF_ID:sll1053; hypothetical protein	NO	NO		0.109
chromosome	86293	A→C	L45L (CTA→CTC)	crtX →	SYN	zeaxanthin glucosyl transferase	YES	YES					0.05	0.063																		0.071	0.061	0.074
pSYSM	89127	A→G	A181A (GCT→GCC)	sll5089 ←	SYN	unknown protein	YES	YES	0.152		0.116	0.069	0.125	0.119	0.135	0.108	0.12	0.136	0.131	0.123	0.119	0.083	0.103	0.121	0.124	0.12	0.076	0.146	0.186	0.157	0.227	0.117	0.121		0.103
pSYSM	89142	G→A	S176S (TCC→TCT)	sll5089 ←	SYN	unknown protein	YES	YES	0.154	0.333	0.115	0.069	0.125	0.117	0.136	0.11	0.114	0.138	0.127	0.119	0.118	0.084	0.1	0.119	0.125	0.119	0.074	0.14	0.19	0.161	0.22	0.116	0.12		0.1
pSYSM	89145	A→G	I175I (ATT→ATC)	sll5089 ←	SYN	unknown protein	YES	YES	0.155	0.332	0.116	0.069	0.124	0.113	0.137	0.11	0.114	0.135	0.13	0.118	0.114	0.084	0.101	0.118	0.125	0.117	0.076	0.14	0.186	0.159	0.22	0.116	0.117		0.1
pSYSM	89148	C→T	R174R (AGG→AGA)	sll5089 ←	SYN	unknown protein	YES	YES	0.148	0.331	0.115	0.069	0.128	0.113	0.137	0.109	0.113	0.135	0.129	0.118	0.115	0.083	0.101	0.116	0.125	0.117	0.075	0.138	0.188	0.159	0.217	0.115	0.117		0.1
pSYSM	89151	C→T	L173L (CTG→CTA)	sll5089 ←	SYN	unknown protein	YES	YES	0.15	0.33	0.116	0.069	0.127	0.112	0.134	0.109	0.112	0.134	0.129	0.118	0.113	0.083	0.1	0.117	0.125	0.117	0.075	0.136	0.188	0.158	0.217	0.116	0.116		0.102
pSYSM	89153	G→A	L173L (CTG→TTG)	sll5089 ←	SYN	unknown protein	YES	YES	0.156	0.349	0.122	0.074	0.137	0.121	0.145	0.116	0.119	0.146	0.138	0.124	0.123	0.09	0.11	0.126	0.136	0.123	0.083	0.144	0.198	0.166	0.234	0.124	0.123	0.051	0.109
pSYSM	89154	A→G	N172N (AAT→AAC)	sll5089 ←	SYN	unknown protein	YES	YES	0.155	0.349	0.122	0.075	0.136	0.121	0.144	0.118	0.119	0.146	0.139	0.124	0.123	0.09	0.11	0.126	0.137	0.125	0.081	0.143	0.196	0.167	0.233	0.124	0.123	0.051	0.108
pSYSM	89157	A→G	R171R (CGT→CGC)	sll5089 ←	SYN	unknown protein	YES	YES	0.156	0.35	0.122	0.074	0.136	0.124	0.146	0.117	0.119	0.148	0.14	0.124	0.127	0.09	0.11	0.126	0.137	0.127	0.081	0.144	0.199	0.167	0.234	0.126	0.123	0.053	0.109
pSYSM	89178	A→G	R164R (CGT→CGC)	sll5089 ←	SYN	unknown protein	YES	YES	0.154	0.311	0.119	0.075	0.133	0.121	0.142	0.112	0.116	0.138	0.138	0.118	0.122	0.088	0.107	0.124	0.133	0.12	0.077	0.138	0.191	0.162	0.23	0.123	0.114	0.054	0.115
pSYSM	89232	A→G	F146F (TTT→TTC)	sll5089 ←	SYN	unknown protein	YES	YES	0.112	0.111	0.108	0.078	0.113	0.089	0.11	0.096	0.105	0.124	0.114	0.104	0.109	0.077	0.08	0.101	0.107	0.095	0.061	0.123	0.157	0.128	0.187	0.095	0.108		0.107
pSYSM	89747	C→T	K169K (AAG→AAA)	sll5090 ←	SYN	unknown protein	YES	YES	0.408	0.404	0.351	0.288	0.395	0.392	0.398	0.39	0.366	0.359	0.376	0.397	0.37	0.371	0.361	0.389	0.412	0.385	0.402	0.442	0.193	0.222	0.367	0.388	0.359	0.184	0.354
pSYSM	89801	G→C	A151A (GCC→GCG)	sll5090 ←	SYN	unknown protein	YES	YES	0.369	0.295	0.258	0.183	0.263	0.3	0.271	0.254	0.25	0.252	0.243	0.281	0.273	0.252	0.241	0.25	0.278	0.253	0.265	0.307	0.101	0.15	0.261	0.276	0.284	0.13	0.269
pSYSM	89852	G→A	P134P (CCC→CCT)	sll5090 ←	SYN	unknown protein	YES	YES	0.334	0.141	0.142	0.07	0.136	0.181	0.158	0.137	0.145	0.146	0.124	0.126	0.153	0.13	0.122	0.146	0.14	0.105	0.147	0.146	0.057	0.069	0.128	0.148	0.151	0.064	0.159
pSYSM	89864	G→C	I130M (ATC→ATG)	sll5090 ←	NON	unknown protein	YES	YES	0.342	0.14	0.142	0.069	0.133	0.178	0.152	0.136	0.142	0.145	0.123	0.125	0.149	0.128	0.12	0.144	0.139	0.104	0.14	0.146	0.056	0.067	0.123	0.144	0.146	0.064	0.157
pSYSX	90184	T→G	F68C (TTT→TGT)	slr6096 →	NON	ORF_ID:slr6096; type I restriction‑modification system, M subunit (fragment)	YES	NO						0.059
pSYSM	91018	T→C	L16L (TTA→CTA)	ssr5092 →	SYN	ORF_ID:ssr5092; hypothetical protein	NO	NO		0.238	0.204
pSYSA	92272	38 bp→35 bp	intergenic (+2374/‑956)	ssr7093 → / → slr7094	NC	ORF_ID:ssr7093; hypothetical protein/DUF6717 family protein	NO	NO	0.467
pSYSX	92679	G→T	S222Y (TCC→TAC)	sll6098 ←	NON	ORF_ID:sll6098; hypothetical protein	YES	YES						0.064																		0.053
pSYSX	92723	C→A	L207F (TTG→TTT)	sll6098 ←	NON	ORF_ID:sll6098; hypothetical protein	YES	YES				0.064	0.103	0.067		0.056										0.065
pSYSX	92730	G→T	T205N (ACT→AAT)	sll6098 ←	NON	ORF_ID:sll6098; hypothetical protein	YES	NO														0.051
pSYSX	92740	A→C	L202V (TTG→GTG)	sll6098 ←	NON	ORF_ID:sll6098; hypothetical protein	YES	NO					0.081
pSYSA	95242	G→T	L175F (TTG→TTT)	slr7097 →	NON	ORF_ID:slr7097; hypothetical protein	NO	YES																								0.056
pSYSM	96439	G→T	E106* (GAA→TAA)	slr5101 →	STOP	ORF_ID:slr5101; hypothetical protein	YES	YES															0.075								0.053
pSYSM	96448	T→A	Y109N (TAC→AAC)	slr5101 →	NON	ORF_ID:slr5101; hypothetical protein	YES	YES														0.056										0.059
pSYSM	96458	G→T	G112V (GGA→GTA)	slr5101 →	NON	ORF_ID:slr5101; hypothetical protein	YES	NO							0.068
pSYSM	106152	T→G	N74H (AAC→CAC)	ssl5114 ←	NON	unknown protein	YES	YES						0.064			0.106												0.082
pSYSM	106798	C→A	L88I (CTA→ATA)	slr5115 →	NON	ORF_ID:slr5115; hypothetical protein	NO	YES																								0.065
pSYSM	117277	Δ1,183 bp	Δ1,183 bp	[sll5130]–[sll5132]	INDEL	[sll5130], sll5131, [sll5132]	NO	NO	1		1
chromosome	124522	T→A	E641V (GAG→GTG)	dfr ←	NON	drug sensory protein A	NO	NO		0.229
chromosome	124629	G→C	F605L (TTC→TTG)	dfr ←	NON	drug sensory protein A	NO	YES																		1
chromosome	125267	T→C	T393A (ACC→GCC)	dfr ←	NON	drug sensory protein A	NO	YES																	1		1
chromosome	134930	A→C	K165T (AAG→ACG)	infB →	NON	initiation factor IF‑2	NO	NO			0.169
chromosome	134961	A→C	K175N (AAA→AAC)	infB →	NON	initiation factor IF‑2	YES	NO											0.061
chromosome	152654	Δ1 bp	coding (397/897 nt)	sll0224 ←	INDEL	ORF_ID:sll0224; hypothetical protein	YES	YES		1	1	1	1	1	1	1	1	1	1	1	1	1	1	1	1	1	1	1	1	1	1	1	1	1	1
chromosome	156743	A→T	*91K (TAA→AAA)	ssl0410 ←	NON	ORF_ID:ssl0410; unknown protein	YES	YES												0.089							0.057
chromosome	177360	C→T	G55E (GGG→GAG)	atpI ←	NON	ATP synthase subunit a	NO	NO	0.661
chromosome	190150	T→G	L40V (TTG→GTG)	slr1094 →	NON	ORF_ID:slr1094; unknown protein	YES	NO													0.163
chromosome	190153	A→T	S41C (AGT→TGT)	slr1094 →	NON	ORF_ID:slr1094; unknown protein	YES	YES				0.125															0.126
chromosome	190160	A→T	E43V (GAG→GTG)	slr1094 →	NON	ORF_ID:slr1094; unknown protein	NO	YES																			0.065
chromosome	217642	A→C	V229G (GTT→GGT)	ccmM ←	NON	carbon dioxide concentrating mechanism protein; CcmM	YES	NO											0.054
chromosome	233012	T→G	P335P (CCT→CCG)	chlD →	SYN	Mg chelatase subunit; ChlD	NO	NO		0.079
chromosome	233024	T→G	A339A (GCT→GCG)	chlD →	SYN	Mg chelatase subunit; ChlD	NO	NO		0.051
chromosome	246673	A→C	F116C (TTT→TGT)	malQ ←	NON	4‑alpha‑glucanotransferase	NO	YES																								0.057
chromosome	277327	G→T	W300L (TGG→TTG)	slr1799 →	NON	ORF_ID:slr1799; unknown protein	NO	YES																				0.056
chromosome	278254	T→G	L609R (CTT→CGT)	slr1799 →	NON	ORF_ID:slr1799; unknown protein	NO	YES																											0.112
chromosome	278273	T→G	P615P (CCT→CCG)	slr1799 →	SYN	ORF_ID:slr1799; unknown protein	NO	YES		0.06																0.13
chromosome	278279	T→G	P617P (CCT→CCG)	slr1799 →	SYN	ORF_ID:slr1799; unknown protein	YES	NO			0.094			0.129
chromosome	297011	A→C	I646L (ATT→CTT)	slr1298 →	NON	ORF_ID:slr1298; hypothetical protein	NO	NO		0.055
chromosome	297012	T→G	I646S (ATT→AGT)	slr1298 →	NON	ORF_ID:slr1298; hypothetical protein	YES	YES		0.129			0.134																	0.107
chromosome	297013	T→G	I646M (ATT→ATG)	slr1298 →	NON	ORF_ID:slr1298; hypothetical protein	YES	NO		0.071						0.092
chromosome	297208	G→T	L711F (TTG→TTT)	slr1298 →	NON	ORF_ID:slr1298; hypothetical protein	NO	YES																				0.064
chromosome	297223	G→T	L716F (TTG→TTT)	slr1298 →	NON	ORF_ID:slr1298; hypothetical protein	NO	YES																			0.056	0.088
chromosome	305454	T→G	L506V (TTG→GTG)	slr1301 →	NON	ORF_ID:slr1301; unknown protein	NO	YES																									0.092
chromosome	305471	G→T	L511F (TTG→TTT)	slr1301 →	NON	ORF_ID:slr1301; unknown protein	YES	NO											0.057
chromosome	312621	T→G	L122V (TTA→GTA)	slr1306 →	NON	ORF_ID:slr1306; unknown protein	YES	NO		0.058		0.08
chromosome	312629	T→G	G124G (GGT→GGG)	slr1306 →	SYN	ORF_ID:slr1306; unknown protein	NO	NO		0.051
chromosome	312637	T→G	L127R (CTA→CGA)	slr1306 →	NON	ORF_ID:slr1306; unknown protein	NO	YES																					0.052
chromosome	321719	T→G	A7A (GCT→GCG)	sir →	SYN	ferredoxin‑sulfite reductase	YES	NO								0.05
chromosome	321738	A→C	K14Q (AAG→CAG)	sir →	NON	ferredoxin‑sulfite reductase	NO	YES																							0.057
chromosome	321742	T→G	V15G (GTA→GGA)	sir →	NON	ferredoxin‑sulfite reductase	YES	NO									0.065
chromosome	331716	A→C	Q191H (CAA→CAC)	cbiH →	NON	precorrin methylase	YES	NO												0.086
chromosome	335959	T→C	S113G (AGC→GGC)	sll0933 ←	NON	ORF_ID:sll0933; unknown protein	YES	YES				1	1	1	1	1	1	1	1	1	1	1	1	1	1	1	1	1	1	1	1	1	1	1	1
chromosome	347692	T→A	R39W (AGG→TGG)	epsB ←	NON	exopolysaccharide export protein	NO	YES																				0.081
chromosome	347699	A→C	G36G (GGT→GGG)	epsB ←	SYN	exopolysaccharide export protein	YES	NO														0.05
chromosome	347715	A→C	L31R (CTT→CGT)	epsB ←	NON	exopolysaccharide export protein	YES	YES							0.091												0.09
chromosome	347757	A→C	L17R (CTA→CGA)	epsB ←	NON	exopolysaccharide export protein	YES	YES	0.116	0.098		0.109	0.125								0.114	0.137		0.097	0.119		0.187	0.135		0.129	0.099		0.094	0.13
chromosome	347820	A→C	intergenic (‑14/+564)	epsB ← / ← sll0922	NC	exopolysaccharide export protein/ORF_ID:sll0922; unknown protein	YES	NO															0.063
chromosome	365954	G→T	S80I (AGT→ATT)	slr1063 →	NON	ORF_ID:slr1063; hypothetical protein	YES	NO				0.126
chromosome	372754	G→T	intergenic (+245/‑57)	galE → / → slr1068	NC	UDP‑glucose‑4‑epimerase/ORF_ID:slr1068; unknown protein	YES	NO												0.06
chromosome	372792	G→T	intergenic (+283/‑19)	galE → / → slr1068	NC	UDP‑glucose‑4‑epimerase/ORF_ID:slr1068; unknown protein	YES	NO															0.073
chromosome	379321	C→T	A86V (GCC→GTC)	slr1075 →	NON	transposase	NO	YES																									0.061
chromosome	383423	T→G	F42V (TTT→GTT)	slr1079 →	NON	ORF_ID:slr1079; unknown protein	NO	NO		0.059
chromosome	389779	T→G	N192T (AAC→ACC)	sll1025 ←	NON	ORF_ID:sll1025; unknown protein	YES	YES		0.052			0.099				0.108											0.067	0.069	0.082	0.085			0.063
chromosome	389818	T→G	Q179P (CAG→CCG)	sll1025 ←	NON	ORF_ID:sll1025; unknown protein	YES	NO					0.1
chromosome	389827	T→G	N176T (AAC→ACC)	sll1025 ←	NON	ORF_ID:sll1025; unknown protein	YES	YES													0.108											0.07
chromosome	389833	T→G	K174T (AAG→ACG)	sll1025 ←	NON	ORF_ID:sll1025; unknown protein	YES	NO		0.059				0.102		0.062
chromosome	418522	C→A	A441E (GCA→GAA)	fmu_fmv →	NON	Fmu and Fmv protein	NO	YES																				0.119	0.062						0.072
chromosome	442494	Δ13 bp	coding (331‑343/1770 nt)	ycf45 →	INDEL	ORF_ID:slr0692; hypothetical protein	NO	YES																				1
chromosome	443761	A→G	E533G (GAA→GGA)	ycf45 →	NON	ORF_ID:slr0692; hypothetical protein	NO	YES																					1
chromosome	470037	A→C	N149T (AAC→ACC)	slr1603 →	NON	ORF_ID:slr1603; hypothetical protein	NO	YES																		0.08					0.103
chromosome	470041	T→G	R150R (CGT→CGG)	slr1603 →	SYN	ORF_ID:slr1603; hypothetical protein	YES	YES	0.114	0.065	0.064			0.055								0.085			0.101			0.089							0.068
chromosome	486376	T→G	E326D (GAA→GAC)	sll1500 ←	NON	ORF_ID:sll1500; hypothetical protein	NO	NO		0.059
chromosome	489030	G→A	G582S (GGC→AGC)	slr1609 →	NON	long‑chain‑fatty‑acid CoA ligase	YES	YES		1	1	1	1	1	1	1	1	1	1	1	1	1	1	1	1	1	1	1	1	1	1	1	1	1	1
chromosome	489322	T→A	L679H (CTC→CAC)	slr1609 →	NON	long‑chain‑fatty‑acid CoA ligase	NO	YES																							0.074
chromosome	489325	A→C	K680T (AAA→ACA)	slr1609 →	NON	long‑chain‑fatty‑acid CoA ligase	NO	YES																									0.076
chromosome	489808	G→A	E29E (GAG→GAA)	slr1041 →	SYN	PatA subfamily	NO	NO	1
chromosome	501554	T→G	N146T (AAT→ACT)	sll1011 ←	NON	ORF_ID:sll1011; hypothetical protein	YES	NO		0.062	0.194		0.175									0.182
chromosome	501564	C→G	E143Q (GAA→CAA)	sll1011 ←	NON	ORF_ID:sll1011; hypothetical protein	YES	YES								0.12																		0.147
chromosome	501571	A→T	H140Q (CAT→CAA)	sll1011 ←	NON	ORF_ID:sll1011; hypothetical protein	YES	YES					0.06			0.05		0.068	0.079						0.056		0.059						0.054
chromosome	501596	T→G	N132T (AAC→ACC)	sll1011 ←	NON	ORF_ID:sll1011; hypothetical protein	YES	NO						0.052						0.06	0.098	0.07	0.079
chromosome	501602	T→G	N130T (AAC→ACC)	sll1011 ←	NON	ORF_ID:sll1011; hypothetical protein	YES	NO													0.065
chromosome	501607	C→G	Q128H (CAG→CAC)	sll1011 ←	NON	ORF_ID:sll1011; hypothetical protein	YES	YES													0.122							0.062
chromosome	527435	Δ42 bp	coding (3090‑3131/5250 nt)	slr1753 →	INDEL	ORF_ID:slr1753; unknown protein	NO	NO		0.105
chromosome	527464	+ACCCGA	coding (3119/5250 nt)	slr1753 →	INDEL	ORF_ID:slr1753; unknown protein	YES	YES		0.876	0.893	0.882	0.861	0.857	0.893	0.884	0.864	0.899	0.84	0.874	0.91	0.875	0.891	0.895	0.864	0.909	0.936	0.868	0.871	0.905	0.892	0.897	0.862	0.829	0.908
chromosome	527464	+54 bp	coding (3119/5250 nt)	slr1753 →	INDEL	ORF_ID:slr1753; unknown protein	NO	NO			0.143
chromosome	527495	Δ24 bp	coding (3150‑3173/5250 nt)	slr1753 →	INDEL	ORF_ID:slr1753; unknown protein	YES	NO															0.097
chromosome	527495	Δ42 bp	coding (3150‑3191/5250 nt)	slr1753 →	INDEL	ORF_ID:slr1753; unknown protein	YES	NO				0.057
chromosome	527588	T→G	P1081P (CCT→CCG)	slr1753 →	SYN	ORF_ID:slr1753; unknown protein	YES	NO														0.139
chromosome	527672	T→C	P1109P (CCT→CCC)	slr1753 →	SYN	ORF_ID:slr1753; unknown protein	YES	NO					0.07
chromosome	527756	C→G	P1137P (CCC→CCG)	slr1753 →	SYN	ORF_ID:slr1753; unknown protein	NO	NO		0.131
chromosome	527837	A→T	E1164D (GAA→GAT)	slr1753 →	NON	ORF_ID:slr1753; unknown protein	NO	YES																	0.188
chromosome	530947	A→T	W97R (TGG→AGG)	sll1647 ←	NON	ORF_ID:sll1647; hypothetical protein	NO	YES																	1		1
chromosome	552987	G→T	intergenic (‑120/+78)	sll1635 ← / ← psbK	NC	ORF_ID:sll1635; Thy1 protein homologue/photosystem II PsbK protein	YES	NO					0.057
chromosome	553008	C→A	intergenic (‑141/+57)	sll1635 ← / ← psbK	NC	ORF_ID:sll1635; Thy1 protein homologue/photosystem II PsbK protein	NO	YES																						0.073
chromosome	555586	T→G	L109V (TTG→GTG)	slr1847 →	NON	ORF_ID:slr1847; hypothetical protein	NO	YES																	0.109
chromosome	576469	A→C	P145P (CCT→CCG)	sll1942 ←	SYN	ORF_ID:sll1942; unknown protein	NO	YES																										0.082
chromosome	576503	T→G	Q134P (CAA→CCA)	sll1942 ←	NON	ORF_ID:sll1942; unknown protein	NO	YES		0.094																								0.071
chromosome	576511	A→C	A131A (GCT→GCG)	sll1942 ←	SYN	ORF_ID:sll1942; unknown protein	YES	NO		0.165		0.165	0.13						0.118			0.122
chromosome	576523	A→C	P127P (CCT→CCG)	sll1942 ←	SYN	ORF_ID:sll1942; unknown protein	NO	YES		0.085																0.12
chromosome	576533	A→C	L124R (CTT→CGT)	sll1942 ←	NON	ORF_ID:sll1942; unknown protein	YES	YES		0.073	0.122	0.139	0.101	0.084			0.141			0.071		0.111			0.079	0.108		0.094					0.102	0.131	0.127
chromosome	577060	A→T	N903K (AAT→AAA)	gyrA ←	NON	DNA gyrase A subunit	NO	YES																											0.074
chromosome	589750	T→C	A841A (GCT→GCC)	slr2046 →	SYN	Fat protein	NO	YES																					1	1	1
chromosome	600587	A→C	F83V (TTT→GTT)	dnaJ ←	NON	DnaJ protein	NO	NO		0.059
chromosome	610343	A→C	E132D (GAA→GAC)	slr1907 →	NON	ORF_ID:slr1907; unknown protein	NO	YES		0.101																0.074
chromosome	614842	T→G	M1R (ATG→AGG) †	slr1911 →	NON	ORF_ID:slr1911; unknown protein	YES	NO													0.057
chromosome	614860	T→G	I7R (ATA→AGA)	slr1911 →	NON	ORF_ID:slr1911; unknown protein	YES	YES													0.07						0.087
chromosome	630595	T→G	K333T (AAG→ACG)	sll0998 ←	NON	LysR transcriptional regulator	NO	YES																											0.086
chromosome	630606	T→G	Q329H (CAA→CAC)	sll0998 ←	NON	LysR transcriptional regulator	YES	YES										0.09										0.098
chromosome	630619	T→G	N325T (AAC→ACC)	sll0998 ←	NON	LysR transcriptional regulator	NO	YES																		0.054
chromosome	664693	A→C	L30V (TTG→GTG)	sll0986 ←	NON	transposase	YES	YES						0.054																0.062
chromosome	693714	C→T	V500M (GTG→ATG)	rnb ←	NON	ribonuclease II	NO	YES																				1
chromosome	695220	C→A	intergenic (‑9/+70)	rnb ← / ← sll1289	NC	ribonuclease II/ORF_ID:sll1289; unknown protein	YES	NO													1
chromosome	700275	T→G	F436V (TTC→GTC)	feoB →	NON	ferrous iron transport protein B	YES	NO													0.057
chromosome	714463	G→T	intergenic (‑285/+2)	sll1584 ← / ← lig	NC	ORF_ID:sll1584; unknown protein/DNA ligase	NO	YES																								0.059
chromosome	715293	T→G	E287D (GAA→GAC)	lig ←	NON	DNA ligase	NO	YES																									0.066
chromosome	724394	C→A	intergenic (‑49/+98)	cpcD ← / ← cpcC	NC	phycocyanin associated linker protein/phycocyanin associated linker protein	YES	YES	0.096					0.054										0.141
chromosome	724422	A→C	intergenic (‑77/+70)	cpcD ← / ← cpcC	NC	phycocyanin associated linker protein/phycocyanin associated linker protein	NO	YES																								0.101
chromosome	727349	A→G	S40P (TCT→CCT)	cpcB ←	NON	phycocyanin b subunit	NO	YES																						1	1
chromosome	731368	Δ1 bp	coding (307/312 nt)	sll1574 ←	INDEL	ORF_ID:sll1574; unknown protein	NO	NO	1
chromosome	735170	A→C	P62P (CCA→CCC)	slr1708 →	SYN	lysostaphin	NO	YES																		0.079							0.052
chromosome	735206	A→C	Q74H (CAA→CAC)	slr1708 →	NON	lysostaphin	YES	YES			0.053		0.063	0.051							0.054				0.055	0.073				0.071			0.086
chromosome	755888	A→C	intergenic (‑286/‑165)	sll1924 ← / → slr2015	NC	ORF_ID:sll1924; hypothetical protein/ORF_ID:slr2015; unknown protein	NO	YES																		0.059
chromosome	755992	G→C	intergenic (‑390/‑61)	sll1924 ← / → slr2015	NC	ORF_ID:sll1924; hypothetical protein/ORF_ID:slr2015; unknown protein	NO	YES																							0.058
chromosome	767446	T→G	G240G (GGT→GGG)	fabD →	SYN	malonyl coenzyme A‑acyl carrier protein transacylase	NO	NO		0.06
chromosome	784869	T→A	V34D (GTC→GAC)	slr1134 →	NON	ORF_ID:slr1134; hypothetical protein	YES	YES													0.067												0.071		0.082
chromosome	815288	G→T	S497I (AGT→ATT)	slr1149 →	NON	ABC transporter	YES	NO									0.065
chromosome	828820	C→T	D82N (GAT→AAT)	rpl17 ←	NON	50S ribosomal protein L17	YES	NO															0.052
chromosome	831484	C→A	L25F (TTG→TTT)	infA ←	NON	initiation factor IF‑1	NO	YES																										0.126
chromosome	831493	G→T	F22L (TTC→TTA)	infA ←	NON	initiation factor IF‑1	YES	NO				0.075
chromosome	831647	C→T	intergenic (‑89/+55)	infA ← / ← adk	NC	initiation factor IF‑1/adenylate kinase	NO	NO	1
chromosome	832302	C→A	intergenic (‑37/+89)	adk ← / ← secY	NC	adenylate kinase/preprotein translocase SecY subunit	NO	YES																1
chromosome	842060	C→T	R185Q (CGG→CAG)	rpl3 ←	NON	50S ribosomal protein L3	YES	YES		1	1	1	1	1	1	1	1	1	1	1	1	1	1	1	1	1	1	1	1	1	1	1	1	1	1
chromosome	858495	G→T	T791N (ACC→AAC)	rpoB ←	NON	RNA polymerase beta subunit	NO	YES																									1	1	1
chromosome	865764	A→C	I205S (ATT→AGT)	sll1124 ←	NON	sensory transduction histidine kinase	YES	YES										0.085													0.063			0.063
chromosome	865785	A→C	L198R (CTG→CGG)	sll1124 ←	NON	sensory transduction histidine kinase	YES	YES										0.072											0.058
chromosome	871563	A→C	L570V (TTG→GTG)	sll1120 ←	NON	chromosome segregation protein SMC1	YES	YES														0.154				0.137					0.166		0.109
chromosome	902704	T→A	T106T (ACT→ACA)	slr1215 →	SYN	ORF_ID:slr1215; unknown protein	NO	YES																									0.052
chromosome	907462	G→A	W164* (TGG→TAG)	slr2070 →	STOP	ORF_ID:slr2070; unknown protein	YES	YES		1	1	1	1	1	1	1	1	1	1	1	1	1	1	1	1	1	1	1	1	1	1	1	1	1	1
chromosome	923835	C→A	G2V (GGA→GTA)	rpl10 ←	SYN	50S ribosomal protein L10	NO	YES																							0.055
chromosome	923861	T→G	intergenic (‑22/+225)	rpl10 ← / ← rpl1	NC	50S ribosomal protein L10/50S ribosomal protein L1	NO	YES																									0.093
chromosome	937328	Δ3 bp	coding (947‑949/1509 nt)	ndhD3 ←	INDEL	NADH dehydrogenase subunit 4	NO	NO	1
chromosome	943495	G→A	V604I (GTC→ATC)	psaA →	NON	P700 apoprotein subunit Ia	YES	YES	1	1	1	1	1	1	1	1	1	1	1	1	1	1	1	1	1	1	1	1	1	1	1	1	1	1	1
chromosome	969966	G→T	T285T (ACC→ACA)	hisC ←	SYN	histidinol‑phosphate aminotransferase	YES	NO							0.081
chromosome	989034	T→G	T158P (ACG→CCG)	sll1464 ←	NON	ORF_ID:sll1464; hypothetical protein	YES	YES														0.079				0.076
chromosome	989035	T→G	E157D (GAA→GAC)	sll1464 ←	NON	ORF_ID:sll1464; hypothetical protein	YES	YES												0.056						0.077
chromosome	996540	A→C	E422D (GAA→GAC)	lysS →	NON	lysyl‑tRNA synthetase	YES	YES														0.091								0.093
chromosome	1007846	T→G	K134T (AAA→ACA)	nrtC ←	NON	nitrate transport protein; NrtC	NO	YES																			0.119
chromosome	1007860	T→G	Q129H (CAA→CAC)	nrtC ←	NON	nitrate transport protein; NrtC	YES	YES						0.098																	0.116
chromosome	1012958	G→T	intergenic (‑70/+87)	repA ← / ← ftsZ	NC	rare lipoprotein A/cell division FtsZ protein	YES	YES	1	1	1	1	1	1	1	1	1	1	1	1	1	1	1	1	1	1	1	1	1	1	1	1	1	1	1
chromosome	1013921	T→G	E139D (GAA→GAC)	ftsZ ←	NON	cell division FtsZ protein	YES	YES		0.121											0.096									0.077					0.138
chromosome	1030834	T→G	L214V (TTG→GTG)	purC →	NON	phosphoribosyl aminoidazole succinocarboxamide synthetase	YES	YES												0.102	0.071												0.102
chromosome	1030851	G→C	Q219H (CAG→CAC)	purC →	NON	phosphoribosyl aminoidazole succinocarboxamide synthetase	NO	YES																						0.063
chromosome	1041117	A→C	Y196S (TAC→TCC)	frdA →	NON	succinate dehydrogenase flavoprotein subunit	NO	NO		0.063
chromosome	1059576	A→C	N347T (AAT→ACT)	pmbA →	NON	PmbA protein	YES	NO							0.051
chromosome	1059601	T→G	L355L (CTT→CTG)	pmbA →	SYN	PmbA protein	YES	YES		0.06					0.069				0.131		0.071				0.061								0.059
chromosome	1065939	T→G	K1024N (AAA→AAC)	dnaX ←	NON	DNA polymerase III subunit	YES	NO												0.059
chromosome	1066022	T→G	R997R (AGG→CGG)	dnaX ←	SYN	DNA polymerase III subunit	YES	NO				0.063						0.067	0.05		0.079	0.05
chromosome	1066233	T→G	E926D (GAA→GAC)	dnaX ←	NON	DNA polymerase III subunit	YES	NO										0.08
chromosome	1102843	G→T	P406T (CCC→ACC)	pykF ←	NON	pyruvate kinase	NO	NO			1
chromosome	1104306	C→A	P21T (CCC→ACC)	slr1362 →	NON	ORF_ID:slr1362; unknown protein	NO	NO		0.068
chromosome	1123506	G→T	Q176K (CAA→AAA)	sll1267 ←	NON	ORF_ID:sll1267; unknown protein	YES	NO					0.069
chromosome	1123510	T→G	E174D (GAA→GAC)	sll1267 ←	NON	ORF_ID:sll1267; unknown protein	YES	YES			0.085	0.114	0.112	0.061		0.097	0.077	0.082	0.082	0.094	0.062	0.1		0.069	0.082	0.067	0.09	0.074			0.083	0.061	0.069	0.068	0.098
chromosome	1137531	T→G	F53V (TTT→GTT)	slr0878 →	NON	ORF_ID:slr0878; hypothetical protein	YES	NO													0.057
chromosome	1137538	C→G	S55C (TCC→TGC)	slr0878 →	NON	ORF_ID:slr0878; hypothetical protein	NO	YES																									0.061
chromosome	1144595	C→A	intergenic (+364/‑133)	slr0882 → / → psr	NC	ORF_ID:slr0882; unknown protein/regulation of penicillin binding protein 5 production	NO	YES																									0.069
chromosome	1144864	A→C	K46T (AAG→ACG)	psr →	NON	regulation of penicillin binding protein 5 production	NO	YES																		0.059
chromosome	1172808	A→C	E746D (GAA→GAC)	slr1403 →	NON	ORF_ID:slr1403; integrin alpha‑ and beta4‑ subunit domain homologue	YES	NO												0.054
chromosome	1178166	C→G	A2532A (GCC→GCG)	slr1403 →	SYN	ORF_ID:slr1403; integrin alpha‑ and beta4‑ subunit domain homologue	NO	YES	0.066																			0.064
chromosome	1178173	C→G	R2535G (CGT→GGT)	slr1403 →	NON	ORF_ID:slr1403; integrin alpha‑ and beta4‑ subunit domain homologue	YES	NO				0.054
chromosome	1178223	C→G	A2551A (GCC→GCG)	slr1403 →	SYN	ORF_ID:slr1403; integrin alpha‑ and beta4‑ subunit domain homologue	NO	YES	0.094																				0.08
chromosome	1178229	A→C	G2553G (GGA→GGC)	slr1403 →	SYN	ORF_ID:slr1403; integrin alpha‑ and beta4‑ subunit domain homologue	NO	YES	0.079																0.06
chromosome	1178245	A→C	N2559H (AAC→CAC)	slr1403 →	NON	ORF_ID:slr1403; integrin alpha‑ and beta4‑ subunit domain homologue	NO	YES																				0.052
chromosome	1178289	T→G	V2573V (GTT→GTG)	slr1403 →	SYN	ORF_ID:slr1403; integrin alpha‑ and beta4‑ subunit domain homologue	YES	YES							0.05	0.054					0.053					0.051				0.061
chromosome	1178301	A→C	K2577N (AAA→AAC)	slr1403 →	NON	ORF_ID:slr1403; integrin alpha‑ and beta4‑ subunit domain homologue	YES	YES		0.065												0.108				0.163
chromosome	1178304	T→G	A2578A (GCT→GCG)	slr1403 →	SYN	ORF_ID:slr1403; integrin alpha‑ and beta4‑ subunit domain homologue	YES	YES									0.082									0.101				0.113
chromosome	1178311	A→C	T2581P (ACT→CCT)	slr1403 →	NON	ORF_ID:slr1403; integrin alpha‑ and beta4‑ subunit domain homologue	YES	YES	0.074	0.081	0.105					0.073	0.148	0.098			0.123	0.123				0.122			0.075	0.108		0.105	0.11	0.088	0.1
chromosome	1178313	T→G	T2581T (ACT→ACG)	slr1403 →	SYN	ORF_ID:slr1403; integrin alpha‑ and beta4‑ subunit domain homologue	YES	YES		0.063								0.089				0.098					0.092					0.107		0.112
chromosome	1178320	A→C	T2584P (ACT→CCT)	slr1403 →	NON	ORF_ID:slr1403; integrin alpha‑ and beta4‑ subunit domain homologue	YES	YES	0.07	0.058							0.112		0.075		0.111					0.122				0.091					0.075
chromosome	1178322	T→G	T2584T (ACT→ACG)	slr1403 →	SYN	ORF_ID:slr1403; integrin alpha‑ and beta4‑ subunit domain homologue	NO	YES																		0.082				0.085				0.058
chromosome	1178329	A→C	T2587P (ACT→CCT)	slr1403 →	NON	ORF_ID:slr1403; integrin alpha‑ and beta4‑ subunit domain homologue	YES	NO										0.055
chromosome	1204616	G→A	C114Y (TGT→TAT)	slr1865 →	NON	ORF_ID:slr1865; unknown protein	NO	NO	1
chromosome	1273773	A→C	E122D (GAA→GAC)	slr2144 →	NON	ORF_ID:slr2144; unknown protein	YES	NO		0.086												0.056
chromosome	1275418	A→T	M247K (ATG→AAG)	sll1710 ←	NON	transposase	NO	YES																									0.07
chromosome	1275437	G→T	P241T (CCT→ACT)	sll1710 ←	NON	transposase	NO	YES																									0.075
chromosome	1278687	T→G	L132W (TTG→TGG)	slr1805 →	NON	sensory transduction histidine kinase	NO	NO		0.054
chromosome	1278705	T→G	L138R (CTG→CGG)	slr1805 →	NON	sensory transduction histidine kinase	NO	YES		0.082																			0.053				0.067		0.112
chromosome	1287745	T→G	N340T (AAC→ACC)	sll1699 ←	NON	extracellular solute‑binding protein	NO	YES																									0.058
chromosome	1288841	T→G	N91T (AAT→ACT)	sll1698 ←	NON	ORF_ID:sll1698; unknown protein	NO	YES																		0.055
chromosome	1300941	Δ45 bp	coding (281‑325/996 nt)	slr1819 →	INDEL	ORF_ID:slr1819; hypothetical protein	NO	NO	0.842
chromosome	1311321	G→T	intergenic (+87/‑507)	nth → / → slr1732	NC	endonuclease III/ORF_ID:slr1732; unknown protein	NO	YES																						0.059
chromosome	1329229	A→G	noncoding (8/74 nt)	trnD‑GUC ←	NC	trnD‑GUC	NO	YES																								1
chromosome	1336429	C→A	P287T (CCT→ACT)	slr1747 →	NON	ORF_ID:slr1747; hypothetical protein	NO	YES																				0.065	0.105				0.073
chromosome	1364187	A→G	L116L (TTG→CTG)	pyrF ←	SYN	orotidine 5' monophosphate decarboxylase	YES	YES	1	1	1	1	1	1	1	1	1	1	1	1	1	1	1	1	1	1	1	1	1	1	1	1	1	1	1
chromosome	1364962	G→T	P168T (CCC→ACC)	sll0837 ←	NON	ORF_ID:sll0837; unknown protein	YES	NO									0.069
chromosome	1364993	C→A	L157F (TTG→TTT)	sll0837 ←	NON	ORF_ID:sll0837; unknown protein	YES	NO								0.062
chromosome	1364997	T→A	D156V (GAT→GTT)	sll0837 ←	NON	ORF_ID:sll0837; unknown protein	NO	YES																	0.114
chromosome	1371709	T→A	L181H (CTC→CAC)	slr0872 →	NON	ORF_ID:slr0872; unknown protein	YES	YES	0.102			0.096	0.107	0.082			0.053	0.112	0.12	0.104	0.11	0.094	0.12	0.057	0.078	0.098	0.101	0.058	0.061	0.064	0.11	0.097	0.089		0.06
chromosome	1371717	G→C	D184H (GAC→CAC)	slr0872 →	NON	ORF_ID:slr0872; unknown protein	YES	YES	0.081			0.07	0.077			0.052		0.139	0.074	0.093	0.109	0.069	0.085	0.052	0.05	0.061	0.053	0.069		0.07	0.103		0.055	0.068	0.055
chromosome	1371729	T→G	W188G (TGG→GGG)	slr0872 →	NON	ORF_ID:slr0872; unknown protein	YES	NO				0.06			0.051
chromosome	1375727	G→T	G126V (GGA→GTA)	slr1243 →	NON	ORF_ID:slr1243; unknown protein	NO	YES																										0.067
chromosome	1375780	G→T	D144Y (GAT→TAT)	slr1243 →	NON	ORF_ID:slr1243; unknown protein	NO	YES																										0.068
chromosome	1375786	G→T	D146Y (GAT→TAT)	slr1243 →	NON	ORF_ID:slr1243; unknown protein	YES	NO											0.053
chromosome	1381040	A→T	I284N (ATC→AAC)	sll1161 ←	NON	adenylate cyclase	YES	NO														0.061
chromosome	1381056	T→G	R279R (AGG→CGG)	sll1161 ←	SYN	adenylate cyclase	NO	YES																		0.066
chromosome	1384680	G→T	D285Y (GAT→TAT)	slr1245 →	NON	transcriptional regulator	NO	YES																								0.059
chromosome	1388614	G→T	intergenic (‑318/‑298)	norA ← / → pstS	NC	quinolene resistance protein; NorA/periplasmic phosphate binding protein	NO	YES																				0.071
chromosome	1388637	C→A	intergenic (‑341/‑275)	norA ← / → pstS	NC	quinolene resistance protein; NorA/periplasmic phosphate binding protein	YES	YES					0.09																				0.069
chromosome	1393381	A→T	E137V (GAA→GTA)	cyp →	NON	peptidyl‑prolyl cis‑trans isomerase	YES	NO														0.068
chromosome	1405598	A→C	S55R (AGC→CGC)	slr1261 →	NON	ORF_ID:slr1261; hypothetical protein	NO	YES																											0.069
chromosome	1405612	A→C	Q59H (CAA→CAC)	slr1261 →	NON	ORF_ID:slr1261; hypothetical protein	YES	NO		0.112					0.216
chromosome	1409502	G→T	Q50K (CAA→AAA)	sll1961 ←	NON	ORF_ID:sll1961; unknown protein	YES	NO											0.062
chromosome	1413986	ISY100 (–) +2 bp	intergenic (+320/‑139)	apqZ → / → topA	NC	water channel protein/DNA topoisomerase I	YES	NO											1
chromosome	1414572	A→T	E149D (GAA→GAT)	topA →	NON	DNA topoisomerase I	NO	YES																	1		1
chromosome	1415511	A→T	K462N (AAA→AAT)	topA →	NON	DNA topoisomerase I	NO	NO		0.061
chromosome	1415578	T→G	Y485D (TAT→GAT)	topA →	NON	DNA topoisomerase I	YES	YES		0.106										0.09														0.089
chromosome	1415589	T→G	A488A (GCT→GCG)	topA →	SYN	DNA topoisomerase I	YES	NO													0.058
chromosome	1415635	A→G	T504A (ACC→GCC)	topA →	NON	DNA topoisomerase I	NO	YES																					1	1	1
chromosome	1417306	A→C	Q8P (CAA→CCA)	slr2060 →	NON	ORF_ID:slr2060; unknown protein	YES	YES														0.069									0.058
chromosome	1417315	T→G	L11R (CTG→CGG)	slr2060 →	NON	ORF_ID:slr2060; unknown protein	YES	YES		0.056						0.111					0.082	0.14				0.135								0.125	0.096
chromosome	1417320	T→G	F13V (TTT→GTT)	slr2060 →	NON	ORF_ID:slr2060; unknown protein	NO	YES																									0.079
chromosome	1417344	T→G	W21G (TGG→GGG)	slr2060 →	NON	ORF_ID:slr2060; unknown protein	YES	NO	0.074	0.057						0.097						0.111
chromosome	1417347	T→G	L22V (TTA→GTA)	slr2060 →	NON	ORF_ID:slr2060; unknown protein	YES	YES														0.06				0.078							0.053
chromosome	1417388	T→G	R35R (CGT→CGG)	slr2060 →	SYN	ORF_ID:slr2060; unknown protein	YES	NO										0.063
chromosome	1421538	T→A	I200N (ATC→AAC)	slr2062 →	NON	transposase	NO	YES																								0.06
chromosome	1426703	Δ1 bp	coding (949/5226 nt)	sll1951 ←	INDEL	hemolysin	YES	YES		1	1	1	1	1	1	1	1	1	1	1	1	1	1	1	1	1	1	1	1	1	1	1	1	1	1
chromosome	1427040	A→C	A204A (GCT→GCG)	sll1951 ←	SYN	hemolysin	YES	YES		0.054							0.113									0.065			0.093
chromosome	1427050	A→C	L201R (CTA→CGA)	sll1951 ←	NON	hemolysin	NO	YES																						0.064
chromosome	1428081	T→G	intergenic (‑430/+115)	sll1951 ← / ← sll1950	NC	hemolysin/ORF_ID:sll1950; unknown protein	YES	YES												0.103						0.078
chromosome	1432903	Δ4 bp	intergenic (‑5/+70)	prmA ← / ← serA	NC	ribosomal protein L11 methyltransferase; PrmA/phosphoglycerate dehydrogenase	NO	YES																								1
chromosome	1438340	C→A	T323N (ACC→AAC)	thl →	NON	acetyl coenzyme A acetyltransferase (thiolase)	YES	NO														0.071
chromosome	1449671	A→C	T538P (ACG→CCG)	slr2002 →	NON	ORF_ID:slr2002; unknown protein	YES	YES				0.057												0.063							0.057
chromosome	1451658	T→G	E287D (GAA→GAC)	sll1902 ←	NON	ORF_ID:sll1902; hypothetical protein	NO	YES																								0.089
chromosome	1482024	T→A	S47C (AGT→TGT)	mntA ←	NON	Mn transporter; MntA	NO	YES																									0.075
chromosome	1489195	A→C	Y118S (TAT→TCT)	slr1727 →	NON	eukaryotic Na+/H+ exchanger	YES	NO												0.069	0.065
chromosome	1489197	T→G	W119G (TGG→GGG)	slr1727 →	NON	eukaryotic Na+/H+ exchanger	NO	YES																						0.059
chromosome	1493196	C→A	P58T (CCC→ACC)	kdpA →	NON	potassium‑transporting ATPase A chain	NO	NO		0.05
chromosome	1510868	T→A	A293A (GCT→GCA)	ndhH →	SYN	NADH dehydrogenase subunit 7	NO	YES																								0.109
chromosome	1512481	T→G	F156V (TTT→GTT)	slr0264 →	NON	ORF_ID:slr0264; hypothetical protein	YES	YES	0.143		0.177	0.166	0.218	0.19	0.164	0.157	0.172	0.191		0.233	0.151	0.209	0.137	0.174	0.137	0.147	0.195	0.158	0.132	0.185	0.173	0.23	0.203		0.171
chromosome	1512482	T→G	F156C (TTT→TGT)	slr0264 →	NON	ORF_ID:slr0264; hypothetical protein	YES	NO			0.067	0.061	0.065			0.083			0.056	0.091
chromosome	1512487	T→G	F158V (TTT→GTT)	slr0264 →	NON	ORF_ID:slr0264; hypothetical protein	YES	YES	0.098		0.098		0.097		0.084		0.062		0.07				0.067			0.055		0.067			0.062	0.122	0.067		0.09
chromosome	1512495	T→G	G160G (GGT→GGG)	slr0264 →	SYN	ORF_ID:slr0264; hypothetical protein	YES	YES			0.061		0.062	0.06						0.072	0.077												0.099	0.055
chromosome	1512503	T→G	L163R (CTG→CGG)	slr0264 →	NON	ORF_ID:slr0264; hypothetical protein	YES	YES	0.107		0.123	0.136	0.136	0.124	0.115	0.162	0.104	0.104	0.098	0.126	0.142	0.125	0.126	0.103	0.111	0.122		0.114		0.106	0.114	0.124	0.161	0.08	0.105
chromosome	1512515	T→G	L167R (CTT→CGT)	slr0264 →	NON	ORF_ID:slr0264; hypothetical protein	YES	YES			0.091	0.109		0.072		0.096									0.091	0.066
chromosome	1513936	G→T	E238* (GAA→TAA)	slr0265 →	STOP	transposase	NO	YES																										0.055
chromosome	1513955	G→C	S244T (AGT→ACT)	slr0265 →	NON	transposase	YES	NO				0.07
chromosome	1514391	G→T	S316R (AGC→AGA)	dfp ←	NON	pantothenate metabolism flavoprotein	YES	NO										0.117
chromosome	1519401	C→A	A96A (GCC→GCA)	slr0267 →	SYN	ORF_ID:slr0267; hypothetical protein	YES	NO															0.054
chromosome	1519410	A→C	K99N (AAA→AAC)	slr0267 →	NON	ORF_ID:slr0267; hypothetical protein	NO	YES																				0.056
chromosome	1519435	G→T	V108F (GTT→TTT)	slr0267 →	NON	ORF_ID:slr0267; hypothetical protein	YES	NO														0.067
chromosome	1520192	T→G	Q303H (CAA→CAC)	sll0245 ←	NON	ORF_ID:sll0245; hypothetical protein	YES	YES				0.06								0.061										0.064
chromosome	1529015	A→T	P749P (CCT→CCA)	sll0242 ←	SYN	ORF_ID:sll0242; unknown protein	YES	NO										0.05
chromosome	1536261	ISY203 (+) +9 bp	coding (1525‑1533/1677 nt)	sll0236 ←	INDEL	ORF_ID:sll0236; unknown protein	YES	YES		1	1	1	1	1	1	1	1	1	1	1	1	1	1	1	1	1	1	1	1	1	1	1	1	1	1
chromosome	1559508	A→T	L35Q (CTA→CAA)	trxA ←	NON	thiol:disulfide interchange protein; TrxA	YES	NO												0.056
chromosome	1559546	A→C	V22V (GTT→GTG)	trxA ←	SYN	thiol:disulfide interchange protein; TrxA	YES	NO										0.083
chromosome	1570385	A→C	E59D (GAA→GAC)	ftsY →	NON	cell division protein; FtsY	YES	YES					0.066						0.053	0.075								0.063
chromosome	1570415	T→G	D69E (GAT→GAG)	ftsY →	NON	cell division protein; FtsY	YES	YES				0.076															0.05
chromosome	1587771	A→C	I181L (ATT→CTT)	slr1505 →	NON	ORF_ID:slr1505; unknown protein	NO	YES	0.086	0.078																			0.08	0.122				0.082
chromosome	1590606	T→G	P37P (CCT→CCG)	slr1506 →	SYN	ORF_ID:slr1506; unknown protein	YES	NO														0.059
chromosome	1591641	A→C	V382V (GTA→GTC)	slr1506 →	SYN	ORF_ID:slr1506; unknown protein	YES	YES		0.115					0.121				0.085							0.085				0.091	0.106	0.091			0.161
chromosome	1591662	T→G	F389L (TTT→TTG)	slr1506 →	NON	ORF_ID:slr1506; unknown protein	NO	YES																								0.074
chromosome	1594769	A→T	K217N (AAA→AAT)	slr1508 →	NON	ORF_ID:slr1508; unknown protein	NO	YES																								0.058
chromosome	1594775	G→T	W219C (TGG→TGT)	slr1508 →	NON	ORF_ID:slr1508; unknown protein	NO	YES																										0.069
chromosome	1594826	C→A	G236G (GGC→GGA)	slr1508 →	SYN	ORF_ID:slr1508; unknown protein	NO	YES																								0.141
chromosome	1595736	T→G	L151R (CTT→CGT)	ntpJ →	NON	Na+ ‑ATPase subunit J	YES	YES			0.079	0.071							0.098	0.082	0.088					0.078						0.057
chromosome	1595795	G→T	A171S (GCC→TCC)	ntpJ →	NON	Na+ ‑ATPase subunit J	YES	NO														0.064
chromosome	1599975	G→T	intergenic (‑437/‑684)	sll1418 ← / → slr1512	NC	ORF_ID:sll1418; unknown protein/ORF_ID:slr1512; unknown protein	YES	YES				0.106																0.074
chromosome	1603727	C→A	A145S (GCC→TCC)	sll1414 ←	NON	ORF_ID:sll1414; hypothetical protein	YES	NO								0.054
chromosome	1611274	T→G	V183G (GTT→GGT)	hglK →	NON	HglK	YES	YES								0.079														0.053
chromosome	1611385	T→A	L220Q (CTG→CAG)	hglK →	NON	HglK	YES	NO											0.076
chromosome	1612753	A→C	intergenic (+124/‑44)	slr1520 → / → hflX	NC	ORF_ID:slr1520; unknown protein/GTP‑binding protein; HflX	NO	YES																		0.052
chromosome	1626535	T→C	I6I (ATT→ATC)	slr2113 →	SYN	transposase	NO	NO		0.071
chromosome	1634322	A→C	N301H (AAC→CAC)	slr2120 →	NON	ORF_ID:slr2120; unknown protein	YES	YES						0.057																					0.056
chromosome	1634399	T→G	P326P (CCT→CCG)	slr2120 →	SYN	ORF_ID:slr2120; unknown protein	YES	NO				0.054
chromosome	1640058	G→C	E39Q (GAA→CAA)	slr2127 →	NON	ORF_ID:slr2127; unknown protein	NO	YES																									0.051
chromosome	1656076	A→C	I12L (ATT→CTT)	spoT →	NON	(p)ppGpp 3'‑pyrophosphohydrolase	NO	YES																						0.055
chromosome	1657898	T→G	I619S (ATT→AGT)	spoT →	NON	(p)ppGpp 3'‑pyrophosphohydrolase	YES	NO		0.058												0.071
chromosome	1667937	T→G	L336V (TTG→GTG)	atpB →	NON	ATP synthase b subunit	NO	NO		0.06
chromosome	1670607	A→T	M503L (ATG→TTG)	ymxG →	NON	processing protease	NO	YES																				0.05
chromosome	1670664	G→T	G5G (GGG→GGT)	fabF →	SYN	beta ketoacyl‑acyl carrier protein synthase	NO	YES																									0.103
chromosome	1680156	G→T	intergenic (+352/‑506)	ssr2227 → / → slr1334	NC	transposase/ORF_ID:slr1334; unknown protein	YES	NO					0.066
chromosome	1683763	T→A	Q166H (CAA→CAT)	sll1217 ←	NON	ORF_ID:sll1217; unknown protein	NO	YES																							0.058
chromosome	1693782	G→A	Q294* (CAG→TAG)	sll0816 ←	STOP	ORF_ID:sll0816; hypothetical protein	NO	YES																				0.607
chromosome	1695943	A→C	V285V (GTT→GTG)	sll0814 ←	SYN	ORF_ID:sll0814; unknown protein	YES	YES													0.067					0.067
chromosome	1703520	T→A	K193M (AAG→ATG)	sll0809 ←	NON	ORF_ID:sll0809; unknown protein	YES	YES												0.06								0.061		0.081
chromosome	1703572	G→T	Q176K (CAA→AAA)	sll0809 ←	NON	ORF_ID:sll0809; unknown protein	YES	NO					0.066
chromosome	1709428	T→G	V66G (GTT→GGT)	slr0820 →	NON	glucosyltransferase	YES	NO												0.092
chromosome	1709429	T→G	V66V (GTT→GTG)	slr0820 →	SYN	glucosyltransferase	YES	YES															0.057						0.082					0.058	0.05
chromosome	1709627	T→G	R132R (CGT→CGG)	slr0820 →	SYN	glucosyltransferase	YES	YES											0.066	0.054													0.053
chromosome	1752309	T→G	I120S (ATT→AGT)	slr1353 →	NON	ORF_ID:slr1353; unknown protein	NO	NO		0.062
chromosome	1752354	T→G	V135G (GTT→GGT)	slr1353 →	NON	ORF_ID:slr1353; unknown protein	NO	YES		0.068																				0.077					0.071
chromosome	1764138	A→C	Y138S (TAT→TCT)	slr1962 →	NON	ORF_ID:slr1962; unknown protein	YES	NO										0.069
chromosome	1771734	T→G	A170A (GCA→GCC)	hisF ←	SYN	cyclase	NO	YES																		0.064					0.079
chromosome	1771743	T→G	K167N (AAA→AAC)	hisF ←	NON	cyclase	YES	YES		0.102						0.123				0.147						0.121
chromosome	1771744	T→G	K167T (AAA→ACA)	hisF ←	NON	cyclase	YES	NO		0.054											0.055
chromosome	1771752	T→G	E164D (GAA→GAC)	hisF ←	NON	cyclase	YES	YES									0.064									0.058	0.063		0.054
chromosome	1773235	A→C	intergenic (‑32/‑111)	sll1892 ← / → slr1968	NC	ORF_ID:sll1892; unknown protein/ORF_ID:slr1968; unknown protein	YES	YES				0.063																0.058	0.058
chromosome	1773301	C→A	intergenic (‑98/‑45)	sll1892 ← / → slr1968	NC	ORF_ID:sll1892; unknown protein/ORF_ID:slr1968; unknown protein	YES	NO											0.101
chromosome	1773323	C→A	intergenic (‑120/‑23)	sll1892 ← / → slr1968	NC	ORF_ID:sll1892; unknown protein/ORF_ID:slr1968; unknown protein	NO	NO	0.06
chromosome	1773382	T→A	F13I (TTT→ATT)	slr1968 →	NON	ORF_ID:slr1968; unknown protein	YES	YES			0.057					0.051														0.071
chromosome	1780484	A→C	M1M (ATG→CTG) †	slr1970 →	SYN	ORF_ID:slr1970; unknown protein	YES	NO					0.077
chromosome	1780485	T→G	M1R (ATG→AGG) †	slr1970 →	NON	ORF_ID:slr1970; unknown protein	YES	YES					0.1																	0.106				0.097
chromosome	1780540	T→G	A19A (GCT→GCG)	slr1970 →	SYN	ORF_ID:slr1970; unknown protein	YES	YES		0.06											0.06					0.068
chromosome	1793692	G→T	intergenic (‑84/‑160)	sll1882 ← / → slr1975	NC	ORF_ID:sll1882; hypothetical protein/renin‑binding protein	YES	YES									0.067															0.059
chromosome	1793727	T→A	intergenic (‑119/‑125)	sll1882 ← / → slr1975	NC	ORF_ID:sll1882; hypothetical protein/renin‑binding protein	NO	YES																								0.05
chromosome	1796771	A→C	R232R (CGT→CGG)	sll1879 ←	SYN	ORF_ID:sll1879; unknown protein	YES	YES		0.085				0.153						0.084	0.091							0.09		0.11	0.133		0.097	0.097
chromosome	1796780	A→C	S229R (AGT→AGG)	sll1879 ←	NON	ORF_ID:sll1879; unknown protein	YES	NO										0.086
chromosome	1796782	T→G	S229R (AGT→CGT)	sll1879 ←	NON	ORF_ID:sll1879; unknown protein	YES	NO									0.07
chromosome	1796792	A→C	P225P (CCT→CCG)	sll1879 ←	SYN	ORF_ID:sll1879; unknown protein	YES	YES							0.094							0.055								0.054
chromosome	1812419	C→T	A225V (GCG→GTG)	slr1983 →	NON	regulatory components of sensory transduction system	NO	NO	1
chromosome	1820010	C→A	intergenic (‑13/+228)	psbA3 ← / ← sll1866	NC	photosystem II D1 protein/ORF_ID:sll1866; hypothetical protein	NO	YES																					0.116	0.084					0.129
chromosome	1820041	G→T	intergenic (‑44/+197)	psbA3 ← / ← sll1866	NC	photosystem II D1 protein/ORF_ID:sll1866; hypothetical protein	NO	NO			0.106
chromosome	1823447	T→G	intergenic (‑8/‑123)	trnR‑ACG ← / → petG	NC	trnR‑ACG/PetG subunit of the cytochrome b6f complex	YES	NO											0.072
chromosome	1832615	C→A	Q86K (CAA→AAA)	slr1474 →	NON	ORF_ID:slr1474; unknown protein	YES	NO													0.065
chromosome	1837838	A→C	L98R (CTT→CGT)	sll1377 ←	NON	ORF_ID:sll1377; hypothetical protein	YES	YES	0.081				0.073		0.07						0.055					0.078
chromosome	1837841	A→C	L97R (CTG→CGG)	sll1377 ←	NON	ORF_ID:sll1377; hypothetical protein	YES	YES		0.094		0.125			0.12										0.108									0.098	0.084
chromosome	1854763	G→T	R221L (CGG→CTG)	rpoC1 →	NON	RNA polymerase gamma‑subunit	NO	YES																		1
chromosome	1856048	G→T	intergenic (+66/+22)	rpoC1 → / ← sll1178	NC	RNA polymerase gamma‑subunit/nodulation protein	NO	NO	0.076
chromosome	1896004	A→C	V199G (GTT→GGT)	desB ←	NON	delta 15 desaturase	NO	NO		0.056
chromosome	1907639	C→A	E36* (GAA→TAA)	sll1433 ←	STOP	ORF_ID:sll1433; hypothetical protein	NO	YES																					0.071
chromosome	1919875	A→G	intergenic (‑59/+38)	rps12 ← / ← sll1095	NC	30S ribosomal protein S12/ORF_ID:sll1095; hypothetical protein	NO	YES																								1
chromosome	1920020	C→A	V177F (GTC→TTC)	sll1095 ←	NON	ORF_ID:sll1095; hypothetical protein	YES	NO											0.066
chromosome	1931782	T→G	L215R (CTG→CGG)	met3 →	NON	sulfate adenylyltransferase	NO	YES																								0.054
chromosome	1938467	A→C	Q13H (CAA→CAC)	slr1170 →	NON	ORF_ID:slr1170; unknown protein	NO	YES																	0.053
chromosome	1949361	ISY203 (–) +9 bp	intergenic (‑537/‑244)	otsA ← / → slr1670	NC	alpha,alpha‑trehalose‑phosphate synthase/ORF_ID:slr1670; unknown protein	NO	NO	1
chromosome	1957652	A→T	intergenic (+166/‑106)	slr1677 → / → rpl21	NC	ORF_ID:slr1677; unknown protein/50S ribosomal protein L21	NO	YES																				0.051
chromosome	1957710	G→C	intergenic (+224/‑48)	slr1677 → / → rpl21	NC	ORF_ID:slr1677; unknown protein/50S ribosomal protein L21	NO	YES																							0.057
chromosome	1972406	A→C	I85L (ATC→CTC)	slr1683 →	NON	transposase	NO	YES																								0.112
chromosome	1972593	A→G	intergenic (+44/‑16)	slr1683 → / → slr1684	NC	transposase/transposase	NO	YES																	1		1
chromosome	1973978	A→C	L263R (CTA→CGA)	sll1559 ←	NON	soluble hydrogenase 42 kD subunit	YES	YES														0.082				0.061
chromosome	1974026	A→C	L247R (CTA→CGA)	sll1559 ←	NON	soluble hydrogenase 42 kD subunit	YES	YES		0.079		0.089	0.091					0.074		0.118		0.095				0.104		0.106	0.083		0.105		0.106
chromosome	1974032	A→T	I245N (ATC→AAC)	sll1559 ←	NON	soluble hydrogenase 42 kD subunit	NO	YES																									0.07
chromosome	1974033	T→G	I245L (ATC→CTC)	sll1559 ←	NON	soluble hydrogenase 42 kD subunit	YES	YES		0.051													0.081										0.058		0.067
chromosome	1974045	A→C	F241V (TTC→GTC)	sll1559 ←	NON	soluble hydrogenase 42 kD subunit	YES	YES			0.092				0.073						0.08	0.069				0.086			0.06					0.061
chromosome	1999008	A→T	Q183H (CAA→CAT)	nadC →	NON	nicotinate‑nucleotide pyrophosphorylase	YES	YES				1	1	1		1	1	1				1		1				1	1	1	1	1	1	1	1
chromosome	2000350	G→A	G292S (GGT→AGT)	slr0937 →	NON	ORF_ID:slr0937; unknown protein	NO	YES																					1
chromosome	2010042	ISY523 (–) +3 bp	intergenic (‑38/‑174)	sll0914 ← / → slr0944	NC	ORF_ID:sll0914; unknown protein/ORF_ID:slr0944; hypothetical protein	NO	YES																									1
chromosome	2011414	T→A	intergenic (+45/‑107)	slr0944 → / → slr0945	NC	ORF_ID:slr0944; hypothetical protein/ORF_ID:slr0945; unknown protein	YES	NO							0.056
chromosome	2011417	A→C	intergenic (+48/‑104)	slr0944 → / → slr0945	NC	ORF_ID:slr0944; hypothetical protein/ORF_ID:slr0945; unknown protein	NO	NO		0.076
chromosome	2013327	A→C	T183P (ACC→CCC)	slr0947 →	NON	OmpR subfamily	NO	YES																					1	1	1
chromosome	2013361	A→G	D194G (GAC→GGC)	slr0947 →	NON	OmpR subfamily	NO	YES																									1	1	1
chromosome	2025243	G→C	R84T (AGG→ACG)	slr0955 →	NON	ORF_ID:slr0955; hypothetical protein	NO	NO			0.063
chromosome	2035618	T→G	L49V (TTA→GTA)	slr1624 →	NON	ORF_ID:slr1624; unknown protein	NO	YES																										0.071
chromosome	2037531	A→T	S333T (TCT→ACT)	bgl ←	NON	beta‑glucosidase	YES	NO					0.055
chromosome	2039568	C→A	L10I (CTC→ATC)	slr1627 →	NON	ORF_ID:slr1627; hypothetical protein	YES	NO													0.065
chromosome	2065848	G→T	intergenic (‑40/+153)	ssl2971 ← / ← prk	NC	ORF_ID:ssl2971; unknown protein/phosphoribulokinase	YES	YES								0.154	0.116												0.134
chromosome	2065853	C→A	intergenic (‑45/+148)	ssl2971 ← / ← prk	NC	ORF_ID:ssl2971; unknown protein/phosphoribulokinase	YES	YES								0.079										0.06						0.081
chromosome	2087759	A→C	intergenic (+26/+45)	slr0443 → / ← trnQ‑UUG	NC	ORF_ID:slr0443; unknown protein/trnQ‑UUG	YES	YES					0.084					0.066			0.079											0.073		0.066
chromosome	2092571	A→T	L313* (TTA→TAA)	sll0422 ←	STOP	asparaginase	YES	YES	1	1	1	1	1	1	1	1	1	1	1	1	1	1	1	1	1	1	1	1	1	1	1	1	1	1	1
chromosome	2096417	A→C	W42G (TGG→GGG)	sll0419 ←	NON	ORF_ID:sll0419; unknown protein	YES	NO													0.06
chromosome	2107458	A→C	N549T (AAC→ACC)	slr0280 →	NON	ORF_ID:slr0280; unknown protein	NO	YES		0.076																	0.088
chromosome	2107485	T→G	L558W (TTG→TGG)	slr0280 →	NON	ORF_ID:slr0280; unknown protein	NO	YES																	0.063
chromosome	2128715	C→A	intergenic (+191/‑52)	slr0287 → / → glnN	NC	ORF_ID:slr0287; unknown protein/glutamate‑‑ammonia ligase	YES	NO										0.087			0.074
chromosome	2172175	G→T	D4186Y (GAT→TAT)	slr0408 →	NON	ORF_ID:slr0408; integrin alpha subunit domain homologue	YES	NO														0.052
chromosome	2180414	C→A	Y114* (TAC→TAA)	slr0149 →	STOP	ORF_ID:slr0149; unknown protein	NO	NO	0.926
chromosome	2180739	T→G	L55V (TTG→GTG)	petF →	NON	ferredoxin	YES	NO													0.059
chromosome	2185567	A→C	L73W (TTG→TGG)	sll0149 ←	NON	ORF_ID:sll0149; unknown protein	NO	YES																								0.057
chromosome	2198893	T→C	L689L (TTA→TTG)	sll0142 ←	SYN	cation or drug efflux system protein	YES	YES	1	1	1	1	1	1	1	1	1	1	1	1	1	1	1	1	1	1	1	1	1	1	1	1	1	1	1
chromosome	2200947	T→G	N5H (AAC→CAC)	sll0142 ←	NON	cation or drug efflux system protein	NO	YES																					0.057
chromosome	2200960	A→C	intergenic (‑1/+187)	sll0142 ← / ← sll0141	NC	cation or drug efflux system protein/ORF_ID:sll0141; hypothetical protein	YES	YES		0.124				0.145		0.242						0.137				0.158		0.164		0.157		0.194	0.138
chromosome	2200966	T→G	intergenic (‑7/+181)	sll0142 ← / ← sll0141	NC	cation or drug efflux system protein/ORF_ID:sll0141; hypothetical protein	NO	YES																								0.079	0.061		0.051
chromosome	2204584	(G)9→8	coding (428/498 nt)	gspF →	INDEL	general secretion pathway protein F	YES	YES	1	1	1	1	1	1	1	1	1	1	1	1	1	1	1	1	1	1	1	1	1	1	1	1	1	1	1
chromosome	2211058	C→A	intergenic (+130/‑225)	slr0166 → / → slr1923	NC	transposase/ORF_ID:slr1923; hypothetical protein	YES	NO													0.11
chromosome	2258878	T→G	S269A (TCG→GCG)	slr0990 →	NON	ORF_ID:slr0990; unknown protein	YES	NO						0.056
chromosome	2261734	A→C	S436R (AGC→CGC)	nlpD →	NON	lipoprotein; NlpD	YES	YES		0.088		0.069								0.067	0.075					0.099		0.126		0.094	0.141	0.055
chromosome	2261737	T→G	L437V (TTG→GTG)	nlpD →	NON	lipoprotein; NlpD	YES	YES		0.11			0.095													0.112						0.12
chromosome	2263848	T→G	L8V (TTA→GTA)	lipB →	NON	LipB protein	YES	YES											0.094											0.088
chromosome	2280652	A→C	F99C (TTT→TGT)	ribC ←	NON	riboflavin synthase alpha chain	YES	NO					0.054
chromosome	2284277	A→C	T162P (ACG→CCG)	xylR →	NON	xylose repressor	YES	YES									0.062														0.066
chromosome	2284330	A→C	Q179H (CAA→CAC)	xylR →	NON	xylose repressor	NO	YES		0.052																		0.073							0.058
chromosome	2288418	C→A	G157G (GGC→GGA)	ndhD →	SYN	NADH dehydrogenase subunit 4	YES	YES								0.055												0.105						0.081
chromosome	2297447	T→A	E375V (GAA→GTA)	sll0294 ←	NON	ORF_ID:sll0294; unknown protein	NO	YES																		0.051
chromosome	2297457	C→A	A372S (GCC→TCC)	sll0294 ←	NON	ORF_ID:sll0294; unknown protein	YES	NO				0.076
chromosome	2301721	A→G	K403E (AAG→GAG)	slr0168 →	NON	ORF_ID:slr0168; unknown protein	NO	NO	1	1	1
chromosome	2347854	C→A	L686F (TTG→TTT)	sll0350 ←	NON	ORF_ID:sll0350; unknown protein	NO	YES																							0.087
chromosome	2350755	T→G	P128P (CCT→CCG)	slr0363 →	SYN	ORF_ID:slr0363; unknown protein	NO	NO		0.054
chromosome	2350805	T→A	L145Q (CTG→CAG)	slr0363 →	NON	ORF_ID:slr0363; unknown protein	NO	YES																					0.102
chromosome	2353159	C→A	Q613K (CAA→AAA)	slr0364 →	NON	ORF_ID:slr0364; unknown protein	YES	NO									0.055
chromosome	2360056	A→C	N2912H (AAC→CAC)	slr0364 →	NON	ORF_ID:slr0364; unknown protein	YES	YES												0.054													0.062
chromosome	2364020	Δ1 bp	coding (3564/5229 nt)	slr0366 →	INDEL	ORF_ID:slr0366; unknown protein	NO	YES																					0.051
chromosome	2371566	G→C	A182G (GCT→GGT)	sphS ←	NON	regulation of the phosphate regulon	YES	NO	0.057		0.058						0.054					0.08
chromosome	2371584	A→T	L176H (CTC→CAC)	sphS ←	NON	regulation of the phosphate regulon	YES	YES				0.075		0.085								0.15	0.141		0.092	0.077							0.079	0.134
chromosome	2371603	T→G	R170R (AGG→CGG)	sphS ←	SYN	regulation of the phosphate regulon	YES	NO								0.13
chromosome	2371611	A→C	I167S (ATT→AGT)	sphS ←	NON	regulation of the phosphate regulon	YES	NO															0.065
chromosome	2399608	C→T	G337S (GGC→AGC)	glcP ←	NON	glucose transport protein	YES	YES			1	1	1	1	1	1	1	1	1	1	1	1	1	1	1	1	1	1	1	1	1	1	1	1	1
chromosome	2400260	A→C	I119M (ATT→ATG)	glcP ←	NON	glucose transport protein	YES	YES		0.134		0.182	0.138											0.13
chromosome	2400261	A→C	I119S (ATT→AGT)	glcP ←	NON	glucose transport protein	NO	NO	0.06
chromosome	2400270	A→C	L116W (TTG→TGG)	glcP ←	NON	glucose transport protein	YES	NO		0.091		0.151						0.126
chromosome	2400280	A→C	W113G (TGG→GGG)	glcP ←	NON	glucose transport protein	NO	NO		0.162
chromosome	2401150	A→C	Q79H (CAA→CAC)	secD →	NON	protein‑export membrane protein; SecD	YES	YES				0.062																			0.065		0.094
chromosome	2404646	T→A	E108V (GAA→GTA)	rpl20 ←	NON	50S ribosomal protein L20	NO	YES																		0.051								0.057
chromosome	2404650	T→A	S107C (AGT→TGT)	rpl20 ←	NON	50S ribosomal protein L20	YES	NO															0.055
chromosome	2404654	A→C	A105A (GCT→GCG)	rpl20 ←	SYN	50S ribosomal protein L20	NO	YES																		0.073
chromosome	2409244	Δ1 bp	coding (301/351 nt)	sll0762 ←	INDEL	ORF_ID:sll0762; unknown protein	YES	YES	1	1	1	1	1	1	1	1	1	1	1	1	1	1	1	1	1	1	1	1	1	1	1	1	1	1	1
chromosome	2419399	Δ1 bp	coding (496/510 nt)	ycf22 ←	INDEL	ORF_ID:sll0751; hypothetical protein	YES	YES	1	1	1	1	1	1	1	1	1	1	1	1	1	1	1	1	1	1	1	1	1	1	1	1	1	1	1
chromosome	2430134	C→A	Q198K (CAA→AAA)	rfbW →	NON	mannosyl transferase	NO	YES																				0.079
chromosome	2453422	T→G	noncoding (254/1489 nt)	rrn16Sa ←	NC	16S ribosomal RNA	YES	NO															1
chromosome	2453429	T→C	noncoding (247/1489 nt)	rrn16Sa ←	NC	16S ribosomal RNA	YES	NO															1
chromosome	2453433	A→T	noncoding (243/1489 nt)	rrn16Sa ←	NC	16S ribosomal RNA	YES	NO															1
chromosome	2497884	T→G	P53P (CCT→CCG)	recG →	SYN	DNA recombinase	YES	YES												0.092						0.077
chromosome	2497887	T→G	G54G (GGT→GGG)	recG →	SYN	DNA recombinase	YES	NO				0.058
chromosome	2497890	T→G	S55R (AGT→AGG)	recG →	NON	DNA recombinase	YES	YES						0.063						0.068	0.07												0.056
chromosome	2498011	C→A	R96S (CGT→AGT)	recG →	NON	DNA recombinase	YES	NO															0.06
chromosome	2498022	G→T	L99F (TTG→TTT)	recG →	NON	DNA recombinase	YES	YES														0.058										0.067
chromosome	2502694	A→C	N395K (AAT→AAG)	ponA ←	NON	penicillin‑binding protein 1A	YES	NO													0.055
chromosome	2507062	G→T	C311F (TGT→TTT)	slr0214 →	NON	cytosine‑specific methyltransferase	YES	NO											0.06			0.09
chromosome	2508864	A→C	T130P (ACG→CCG)	cobU →	NON	cobinamide kinase/cobinamide phosphate guanylyltransferase	NO	YES		0.054															0.096				0.07
chromosome	2510428	G→C	Q290E (CAA→GAA)	sll0209 ←	NON	ORF_ID:sll0209; hypothetical protein	NO	YES																1
chromosome	2513931	G→A	P42P (CCG→CCA)	glyS →	SYN	glycyl‑tRNA synthetase beta chain	NO	NO			1
chromosome	2521013	T→C	F898S (TTT→TCT)	slr0222 →	NON	hybrid sensory kinase	NO	NO	1
chromosome	2546987	T→G	Q14P (CAG→CCG)	sll0410 ←	NON	ORF_ID:sll0410; unknown protein	NO	NO		0.054
chromosome	2546995	T→G	P11P (CCA→CCC)	sll0410 ←	SYN	ORF_ID:sll0410; unknown protein	YES	NO		0.063							0.068	0.058			0.066
chromosome	2547012	T→G	K6Q (AAG→CAG)	sll0410 ←	NON	ORF_ID:sll0410; unknown protein	YES	NO						0.076
chromosome	2550585	T→G	intergenic (+62/‑168)	accB → / → ccmK	NC	biotin carboxyl carrier protein of acetyl‑CoA carboxylase/carbon dioxide concentrating mechanism protein; CcmK	YES	NO													0.069
chromosome	2551152	T→G	L134V (TTG→GTG)	ccmK →	NON	carbon dioxide concentrating mechanism protein; CcmK	YES	NO			0.091			0.093
chromosome	2551155	A→T	S135C (AGC→TGC)	ccmK →	NON	carbon dioxide concentrating mechanism protein; CcmK	YES	NO													0.122
chromosome	2551174	T→G	L141R (CTA→CGA)	ccmK →	NON	carbon dioxide concentrating mechanism protein; CcmK	NO	YES																								0.093
chromosome	2551178	G→T	L142F (TTG→TTT)	ccmK →	NON	carbon dioxide concentrating mechanism protein; CcmK	YES	NO													0.067
chromosome	2551199	T→G	A149A (GCT→GCG)	ccmK →	SYN	carbon dioxide concentrating mechanism protein; CcmK	YES	NO	0.085								0.112
chromosome	2560781	G→A	D175D (GAC→GAT)	gltA ←	SYN	citrate synthase	NO	NO		0.13
chromosome	2574607	A→C	L213R (CTG→CGG)	sll0066 ←	NON	ORF_ID:sll0066; unknown protein	NO	NO		0.066
chromosome	2574613	A→C	L211R (CTG→CGG)	sll0066 ←	NON	ORF_ID:sll0066; unknown protein	NO	YES		0.073																		0.101
chromosome	2574628	A→C	V206G (GTG→GGG)	sll0066 ←	NON	ORF_ID:sll0066; unknown protein	YES	NO		0.062										0.06
chromosome	2579902	Δ10 bp	coding (225‑234/828 nt)	sll0064 ←	INDEL	ORF_ID:sll0064; unknown protein	YES	YES		1	1	1	1	1	1	1	1	1	1	1	1	1	1	1	1	1	1	1	1	1	1	1	1	1	1
chromosome	2590426	A→C	E192D (GAA→GAC)	gspE →	NON	general secretion pathway protein E	YES	YES		0.051			0.062									0.074							0.1			0.063	0.054		0.077
chromosome	2590427	A→C	R193R (AGG→CGG)	gspE →	SYN	general secretion pathway protein E	YES	NO			0.066											0.068
chromosome	2591316	T→G	F489C (TTT→TGT)	gspE →	NON	general secretion pathway protein E	NO	YES		0.051																0.151									0.168
chromosome	2594192	A→C	Q46H (CAA→CAC)	ribG →	NON	riboflavin biosynthesis protein	YES	YES							0.085					0.118		0.062				0.096				0.107	0.112		0.12
chromosome	2602717	C→A	H82Q (CAC→CAA)	slr0468 →	NON	ORF_ID:slr0468; unknown protein	YES	YES	1	1	1	1	1	1	1	1	1	1	1	1	1	1	1	1	1	1	1	1	1	1	1	1	1	1	1
chromosome	2602734	T→A	I88N (ATT→AAT)	slr0468 →	NON	ORF_ID:slr0468; unknown protein	YES	YES	1	1	1	1	1	1	1	1	1	1	1	1	1	1	1	1	1	1	1	1	1	1	1	1	1	1	1
chromosome	2613769	T→G	V18G (GTT→GGT)	purN →	NON	phosphoribosylglycinamide formyltransferase	NO	NO		0.069
chromosome	2613773	T→G	A19A (GCT→GCG)	purN →	SYN	phosphoribosylglycinamide formyltransferase	NO	NO		0.053	0.064
chromosome	2613798	T→G	C28G (TGT→GGT)	purN →	NON	phosphoribosylglycinamide formyltransferase	NO	YES		0.051																0.097			0.063
chromosome	2613808	T→G	L31R (CTT→CGT)	purN →	NON	phosphoribosylglycinamide formyltransferase	NO	YES		0.063																0.062
chromosome	2613827	T→G	G37G (GGT→GGG)	purN →	SYN	phosphoribosylglycinamide formyltransferase	NO	NO			0.069
chromosome	2613833	T→G	G39G (GGT→GGG)	purN →	SYN	phosphoribosylglycinamide formyltransferase	YES	NO							0.054
chromosome	2635009	C→A	G70V (GGG→GTG)	sll0687 ←	NON	ORF_ID:sll0687; hypothetical protein	YES	YES		1	1	1	1	1	1	1	1	1	1	1	1	1	1	1	1	1	1	1	1	1	1	1	1	1	1
chromosome	2636881	G→T	Q250K (CAA→AAA)	pstB ←	NON	phosphate transport ATP‑binding protein; PstB	YES	NO						0.08								0.066
chromosome	2657555	A→C	C14G (TGT→GGT)	sll0611 ←	NON	ORF_ID:sll0611; unknown protein	NO	YES			0.077													0.082					0.074						0.099
chromosome	2657566	A→C	L10R (CTG→CGG)	sll0611 ←	NON	ORF_ID:sll0611; unknown protein	NO	NO		0.057
chromosome	2657594	T→G	M1M (ATG→CTG) †	sll0611 ←	SYN	ORF_ID:sll0611; unknown protein	YES	YES									0.076		0.065							0.081			0.057	0.08
chromosome	2673053	T→G	E306D (GAA→GAC)	sll0602 ←	NON	ORF_ID:sll0602; unknown protein	YES	YES		0.137	0.151		0.093	0.105											0.103	0.08	0.061			0.112	0.113	0.094	0.112	0.116	0.102
chromosome	2680983	A→T	I297N (ATC→AAC)	dgt ←	NON	dGTP triphosphohydrolase	YES	NO													0.063
chromosome	2682603	T→G	E208D (GAA→GAC)	sll0396 ←	NON	OmpR subfamily	NO	YES																					0.051
chromosome	2699474	T→G	A101A (GCT→GCG)	slr0420 →	SYN	ORF_ID:slr0420; unknown protein	YES	NO						0.071						0.096
chromosome	2713053	G→T	L85I (CTT→ATT)	sll0371 ←	NON	ORF_ID:sll0371; unknown protein	YES	NO											0.054	0.054
chromosome	2713071	G→T	P79T (CCA→ACA)	sll0371 ←	NON	ORF_ID:sll0371; unknown protein	NO	YES																									0.06
chromosome	2713099	C→A	L69F (TTG→TTT)	sll0371 ←	NON	ORF_ID:sll0371; unknown protein	YES	YES							0.078				0.067						0.067	0.075
chromosome	2714938	T→G	K584T (AAA→ACA)	carB ←	NON	carbamoyl‑phosphate synthase, pyrimidine‑specific, large chain	YES	YES				0.061									0.05			0.05									0.083
chromosome	2721706	A→C	F177V (TTC→GTC)	sll0188 ←	NON	ORF_ID:sll0188; unknown protein	YES	NO													0.059
chromosome	2733752	A→C	Q224H (CAA→CAC)	hdrB →	NON	heterodisulfide reductase subunit B	NO	YES																		0.065
chromosome	2744040	T→A	I249N (ATT→AAT)	slr0207 →	NON	ORF_ID:slr0207; unknown protein	YES	NO													0.054
chromosome	2747639	A→C	Q12H (CAA→CAC)	slr0210 →	NON	sensory transduction histidine kinase	YES	NO					0.062					0.088
chromosome	2748897	C→T	intergenic (+40/‑49)	slr0210 → / → ssr0332	NC	sensory transduction histidine kinase/ORF_ID:ssr0332; unknown protein	YES	YES	1	1	1	1	1	1	1	1	1	1	1	1	1	1	1	1	1	1	1	1	1	1	1	1	1	1	1
chromosome	2776594	T→G	H276Q (CAT→CAG)	slr0904 →	NON	ORF_ID:slr0904; hypothetical protein	YES	NO												0.057
chromosome	2780446	G→T	D313Y (GAT→TAT)	psbB →	NON	photosystem II CP47 protein	YES	YES		1	1	1	1	1	1	1	1	1	1	1	1	1	1	1	1	1	1	1	1	1	1	1	1	1	1
chromosome	2781745	G→T	D115Y (GAT→TAT)	slr0907 →	NON	ORF_ID:slr0907; unknown protein	NO	YES																			0.087
chromosome	2781751	C→A	Q117K (CAA→AAA)	slr0907 →	NON	ORF_ID:slr0907; unknown protein	YES	YES						0.062													0.134
chromosome	2852832	G→A	A171A (GCC→GCT)	sll0827 ←	SYN	ORF_ID:sll0827; unknown protein	YES	YES		1	1	1	1	1	1	1	1	1	1	1	1	1	1	1	1	1	1	1	1	1	1	1	1	1	1
chromosome	2868668	T→G	V251G (GTG→GGG)	slr0848 →	NON	ORF_ID:slr0848; hypothetical protein	NO	YES																				0.075					0.082
chromosome	2868679	A→C	S255R (AGC→CGC)	slr0848 →	NON	ORF_ID:slr0848; hypothetical protein	YES	YES		0.085							0.104			0.053			0.145							0.094			0.083	0.072	0.062
chromosome	2868684	A→C	P256P (CCA→CCC)	slr0848 →	SYN	ORF_ID:slr0848; hypothetical protein	NO	NO		0.076
chromosome	2868696	T→G	P260P (CCT→CCG)	slr0848 →	SYN	ORF_ID:slr0848; hypothetical protein	NO	NO		0.094
chromosome	2868702	T→G	P262P (CCT→CCG)	slr0848 →	SYN	ORF_ID:slr0848; hypothetical protein	NO	NO		0.055
chromosome	2868709	A→C	K265Q (AAA→CAA)	slr0848 →	NON	ORF_ID:slr0848; hypothetical protein	YES	NO		0.065											0.063
chromosome	2868718	A→C	R268R (AGA→CGA)	slr0848 →	SYN	ORF_ID:slr0848; hypothetical protein	YES	NO		0.099	0.095			0.065						0.052	0.061
chromosome	2868741	T→G	R275R (CGT→CGG)	slr0848 →	SYN	ORF_ID:slr0848; hypothetical protein	NO	NO		0.063	0.053
chromosome	2888839	G→T	R399L (CGG→CTG)	deaD →	NON	ATP‑dependent RNA helicase; DeaD	NO	YES																								1
chromosome	2909615	A→C	L63V (TTG→GTG)	sll0486 ←	NON	ORF_ID:sll0486; PCC7942 clock gene...ORFE	YES	NO														0.087	0.057
chromosome	2911607	A→C	F85V (TTT→GTT)	sll0484 ←	NON	ABC transporter	NO	YES																				0.073
chromosome	2913608	T→G	T166T (ACT→ACG)	slr0503 →	SYN	ORF_ID:slr0503; hypothetical protein	NO	YES		0.078	0.078														0.08
chromosome	2913615	A→C	N169H (AAC→CAC)	slr0503 →	NON	ORF_ID:slr0503; hypothetical protein	YES	YES		0.063									0.083													0.083			0.067
chromosome	2913621	A→C	R171R (AGA→CGA)	slr0503 →	SYN	ORF_ID:slr0503; hypothetical protein	NO	NO		0.072
chromosome	2913626	A→C	P172P (CCA→CCC)	slr0503 →	SYN	ORF_ID:slr0503; hypothetical protein	YES	NO		0.054									0.07
chromosome	2913632	T→G	R174R (CGT→CGG)	slr0503 →	SYN	ORF_ID:slr0503; hypothetical protein	YES	YES		0.122	0.084			0.12	0.087		0.091		0.099	0.112				0.084	0.119		0.087	0.109	0.092			0.117		0.134	0.08
chromosome	2913638	T→G	R176R (CGT→CGG)	slr0503 →	SYN	ORF_ID:slr0503; hypothetical protein	NO	NO		0.065
chromosome	2913642	T→G	S178A (TCC→GCC)	slr0503 →	NON	ORF_ID:slr0503; hypothetical protein	NO	NO		0.093
chromosome	2913647	T→G	A179A (GCT→GCG)	slr0503 →	SYN	ORF_ID:slr0503; hypothetical protein	NO	NO		0.061
chromosome	2913656	T→G	S182R (AGT→AGG)	slr0503 →	NON	ORF_ID:slr0503; hypothetical protein	NO	NO		0.056
chromosome	2913664	A→C	Q185P (CAA→CCA)	slr0503 →	NON	ORF_ID:slr0503; hypothetical protein	NO	YES		0.088																							0.103
chromosome	2913683	T→G	P191P (CCT→CCG)	slr0503 →	SYN	ORF_ID:slr0503; hypothetical protein	NO	YES		0.084																		0.097
chromosome	2913686	T→G	G192G (GGT→GGG)	slr0503 →	SYN	ORF_ID:slr0503; hypothetical protein	YES	NO		0.069			0.078
chromosome	2927729	C→A	G658W (GGG→TGG)	sll0474 ←	NON	sensory transduction histidine kinase	NO	YES																			0.053
chromosome	2927765	T→A	K646* (AAG→TAG)	sll0474 ←	STOP	sensory transduction histidine kinase	YES	NO					0.066
chromosome	2942656	T→A	K76N (AAA→AAT)	sll0597 ←	NON	ORF_ID:sll0597; hypothetical protein	YES	NO													0.061
chromosome	2942661	C→A	E75* (GAA→TAA)	sll0597 ←	STOP	ORF_ID:sll0597; hypothetical protein	YES	NO						0.096
chromosome	2949009	A→C	Q149H (CAA→CAC)	slr0616 →	NON	ORF_ID:slr0616; hypothetical protein	YES	YES		0.058					0.06						0.056														0.051
chromosome	2987931	T→G	N227H (AAC→CAC)	sll0096 ←	NON	ORF_ID:sll0096; unknown protein	NO	YES																							0.111
chromosome	2987934	G→T	Q226K (CAA→AAA)	sll0096 ←	NON	ORF_ID:sll0096; unknown protein	NO	YES																									0.104
chromosome	2987971	T→G	Q213H (CAA→CAC)	sll0096 ←	NON	ORF_ID:sll0096; unknown protein	NO	YES																			0.075
chromosome	2991143	T→G	P252P (CCA→CCC)	sll0094 ←	SYN	sensory transduction histidine kinase	YES	YES		0.067											0.058												0.066
chromosome	2991155	A→C	T248T (ACT→ACG)	sll0094 ←	SYN	sensory transduction histidine kinase	YES	YES		0.095	0.113						0.139		0.097	0.113					0.102	0.089	0.093	0.13	0.071					0.085	0.085
chromosome	2991180	A→C	M240R (ATG→AGG)	sll0094 ←	NON	sensory transduction histidine kinase	NO	NO		0.071
chromosome	2993968	T→G	I155S (ATT→AGT)	slr0112 →	NON	ORF_ID:slr0112; unknown protein	YES	YES				0.062									0.064		0.056										0.067
chromosome	2998050	C→A	E11* (GAA→TAA)	ssl0172 ←	STOP	transposase	NO	NO			0.063
chromosome	3003503	A→C	T180P (ACG→CCG)	slr0121 →	NON	ORF_ID:slr0121; unknown protein	YES	YES								0.076																	0.056
chromosome	3003517	A→C	E184D (GAA→GAC)	slr0121 →	NON	ORF_ID:slr0121; unknown protein	YES	YES													0.086					0.06			0.062			0.069	0.074		0.121
chromosome	3003535	A→C	E190D (GAA→GAC)	slr0121 →	NON	ORF_ID:slr0121; unknown protein	YES	YES	0.084			0.079	0.095							0.052						0.086
chromosome	3014665	T→C	T92T (ACT→ACC)	slr0302 →	SYN	ORF_ID:slr0302; PleD gene product homologue	NO	NO	1
chromosome	3037493	G→C	V62L (GTT→CTT)	slr0315 →	NON	ORF_ID:slr0315; hypothetical protein	NO	YES																	1		1
chromosome	3067121	G→T	A125S (GCC→TCC)	slr0800 →	NON	transposase	YES	NO									0.071
chromosome	3074098	G→T	A214E (GCA→GAA)	sll0782 ←	NON	putative protein kinase	YES	NO														0.054
chromosome	3096187	T→C	I47T (ATA→ACA)	ssr1175 →	NON	transposase	YES	YES	1	1	1	1	1	1	1	1	1	1	1	1	1	1	1	1	1	1	1	1	1	1	1	1	1	1	1
chromosome	3098707	T→C	C95R (TGT→CGT)	ssr1176 →	NON	transposase	NO	NO	1
chromosome	3101375	T→G	E64D (GAA→GAC)	sll0672 ←	NON	cation‑transporting ATPase; E1‑E2 ATPase	NO	YES																						0.062	0.064
chromosome	3110189	G→A	intergenic (‑37/+27)	sll0666 ← / ← sll0665	NC	transposase/transposase	YES	YES	1	1	1	1	1	1	1	1	1	1	1	1	1	1	1	1	1	1	1	1	1	1	1	1	1	1	1
chromosome	3110343	G→T	P73Q (CCA→CAA)	sll0665 ←	NON	transposase	YES	YES	1	1	1	1	1	1	1	1	1	1	1	1	1	1	1	1	1	1	1	1	1	1	1	1	1	1	1
chromosome	3117309	G→T	G261G (GGC→GGA)	pdxA ←	SYN	pyridoxal phosphate biosynthetic protein; PdxA	NO	NO			0.085
chromosome	3142651	A→G	L75L (CTT→CTC)	sps ←	SYN	sucrose phosphate synthase	YES	YES	1	1	1	1	1	1	1	1	1	1	1	1	1	1	1	1	1	1	1	1	1	1	1	1	1	1	1
chromosome	3143947	C→A	G79W (GGG→TGG)	sll0044 ←	NON	ORF_ID:sll0044; unknown protein	YES	NO						0.058
chromosome	3147576	T→G	E282D (GAA→GAC)	sll0043 ←	NON	CheA like protein	YES	YES		0.074		0.076			0.079					0.069		0.115				0.101					0.096		0.105	0.079
chromosome	3147594	T→G	E276D (GAA→GAC)	sll0043 ←	NON	CheA like protein	YES	NO		0.054											0.06
chromosome	3147627	T→G	E265D (GAA→GAC)	sll0043 ←	NON	CheA like protein	YES	YES		0.052		0.051	0.076	0.09	0.071		0.068			0.055	0.074	0.05											0.058
chromosome	3147633	T→G	Q263H (CAA→CAC)	sll0043 ←	NON	CheA like protein	YES	NO														0.068
chromosome	3151491	T→G	M163L (ATG→CTG)	sll0041 ←	NON	tsr or; CheD	YES	YES					0.052											0.05
chromosome	3154633	A→T	S10T (TCA→ACA)	sll0038 ←	NON	PatA subfamily	NO	YES																						0.094
chromosome	3162779	C→A	A489S (GCC→TCC)	sll0033 ←	NON	ORF_ID:sll0033; unknown protein	YES	NO													0.095
chromosome	3163025	T→G	I407L (ATC→CTC)	sll0033 ←	NON	ORF_ID:sll0033; unknown protein	NO	YES																									0.05
chromosome	3174137	C→A	T268N (ACC→AAC)	nrtC →	NON	nitrate transport protein; NrtC	YES	NO															0.058
chromosome	3181140	G→A	A133V (GCC→GTC)	sll0518 ←	NON	ORF_ID:sll0518; unknown protein	YES	YES				1	1	1	1	1	1	1	1	1	1	1	1	1	1	1	1	1	1	1	1	1	1	1	1
chromosome	3185897	T→G	L389V (TTG→GTG)	murE →	NON	UDP‑MurNac‑tripeptide synthetase	YES	YES		0.06	0.194			0.196					0.187						0.176	0.235			0.183		0.188				0.239
chromosome	3185900	A→T	I390F (ATT→TTT)	murE →	NON	UDP‑MurNac‑tripeptide synthetase	YES	NO													0.091
chromosome	3185906	A→T	I392L (ATA→TTA)	murE →	NON	UDP‑MurNac‑tripeptide synthetase	NO	YES																										0.056
chromosome	3191902	T→G	K198T (AAG→ACG)	sll0513 ←	NON	ORF_ID:sll0513; unknown protein	NO	NO		0.082
chromosome	3195783	T→G	G595G (GGT→GGG)	slt →	SYN	soluble lytic transglycosylase	NO	YES																			0.064
chromosome	3199322	A→C	I198L (ATC→CTC)	hemE →	NON	uroporphyrinogen decarboxylase	YES	YES												0.064							0.051
chromosome	3204849	A→C	V268G (GTT→GGT)	sll0505 ←	NON	ORF_ID:sll0505; hypothetical protein	NO	YES																									0.05
chromosome	3238625	G→T	Q82K (CAA→AAA)	sll0896 ←	NON	Holliday juction resolvase; RuvC	NO	YES																							0.084
chromosome	3240255	A→C	E25D (GAA→GAC)	trpC →	NON	indole‑3‑glycerol phosphate synthase	YES	NO							0.055
chromosome	3259369	A→C	V173V (GTT→GTG)	sll0529 ←	SYN	ORF_ID:sll0529; unknown protein	NO	YES																							0.063
chromosome	3260096	(C)7→6	intergenic (‑209/+41)	sll0529 ← / ← sll0528	NC	ORF_ID:sll0529; unknown protein/ORF_ID:sll0528; hypothetical protein	YES	YES	1	1	1	1	1	1	1	1	1	1	1	1	1	1	1	1	1	1	1	1	1	1	1	1	1	1	1
chromosome	3271508	A→C	Q353P (CAG→CCG)	pyrD →	NON	dihydroorotate dehydrogenase	NO	YES																		0.146						0.103
chromosome	3283284	T→G	E41D (GAA→GAC)	sll1340 ←	NON	ORF_ID:sll1340; unknown protein	YES	YES													0.054		0.063	0.052
chromosome	3284295	A→C	R184R (CGT→CGG)	sll1338 ←	SYN	ORF_ID:sll1338; unknown protein	NO	NO		0.101
chromosome	3284306	T→G	M181L (ATG→CTG)	sll1338 ←	NON	ORF_ID:sll1338; unknown protein	NO	NO		0.084
chromosome	3284325	A→C	P174P (CCT→CCG)	sll1338 ←	SYN	ORF_ID:sll1338; unknown protein	NO	NO		0.05
chromosome	3284332	A→C	V172G (GTG→GGG)	sll1338 ←	NON	ORF_ID:sll1338; unknown protein	YES	YES		0.113									0.08					0.133										0.137
chromosome	3284340	A→C	P169P (CCT→CCG)	sll1338 ←	SYN	ORF_ID:sll1338; unknown protein	YES	NO		0.068					0.123			0.141
chromosome	3286904	C→G	E89Q (GAA→CAA)	sll1336 ←	NON	ORF_ID:sll1336; hypothetical protein	YES	YES				0.087		0.084						0.061	0.117		0.101			0.096		0.1				0.051
chromosome	3293794	T→G	P239P (CCT→CCG)	slr1431 →	SYN	ORF_ID:slr1431; unknown protein	YES	YES		0.068				0.089					0.088	0.076	0.085									0.122
chromosome	3298825	C→A	P167Q (CCA→CAA)	sbpA →	NON	sulfate binding protein; SbpA	NO	YES																	0.06
chromosome	3306427	G→T	P783T (CCA→ACA)	sll1366 ←	NON	helicase of the snf2/rad54 family	NO	YES																											0.055
chromosome	3306444	G→T	T777N (ACC→AAC)	sll1366 ←	NON	helicase of the snf2/rad54 family	NO	YES																				0.062
chromosome	3306453	G→T	T774N (ACC→AAC)	sll1366 ←	NON	helicase of the snf2/rad54 family	YES	YES								0.07																0.075
chromosome	3319419	T→G	L47V (TTG→GTG)	hisA →	NON	phosphorybosilformimino‑5‑amino‑phosphorybosil‑ 4‑imidazolecarboxamideisomerase	NO	YES																				0.087
chromosome	3323561	G→T	R96L (CGT→CTT)	rpoDI →	NON	RNA polymerase sigma factor	YES	YES				1	1	1	1	1	1	1	1	1	1	1	1	1	1	1	1	1	1	1	1	1	1	1	1
chromosome	3342594	T→G	intergenic (‑152/‑263)	sll0624 ← / → speA	NC	ORF_ID:sll0624; unknown protein/arginine decarboxylase	NO	YES																							0.068
chromosome	3353444	G→T	L83F (TTG→TTT)	slr0668 →	NON	ORF_ID:slr0668; unknown protein	NO	YES																							0.054
chromosome	3355884	C→A	L993F (TTG→TTT)	gltB ←	NON	ferredoxin‑dependent glutamate synthase	YES	YES													0.054				0.068									0.077
chromosome	3362629	Δ8 bp	coding (573‑580/1110 nt)	slr1557 →	INDEL	ORF_ID:slr1557; unknown protein	NO	YES																		1
chromosome	3380463	A→C	M112L (ATG→CTG)	slr1570 →	NON	ORF_ID:slr1570; unknown protein	YES	NO				0.066								0.076
chromosome	3395730	T→G	intergenic (‑12/+33)	devB ← / ← sll1477	NC	glucose‑6‑P‑dehydrogenase/ORF_ID:sll1477; unknown protein	YES	YES					0.054						0.084		0.089	0.058					0.068			0.079	0.091	0.121		0.062	0.058
chromosome	3400025	C→A	R109L (CGG→CTG)	sll1475 ←	NON	sensory transduction histidine kinase	NO	NO	1
chromosome	3400332	Δ1,183 bp	Δ1,183 bp	[sll1475]–[sll1473]	INDEL	[sll1475], sll1474, [sll1473]	YES	YES	1		1									1				1										1
chromosome	3415169	G→T	E113* (GAA→TAA)	slr0748 →	STOP	ORF_ID:slr0748; unknown protein	YES	NO												0.055
chromosome	3421017	G→C	R201P (CGA→CCA)	eno →	NON	enolase	YES	NO											0.051
chromosome	3423662	G→T	E211* (GAG→TAG)	p →	STOP	P protein	NO	YES																		0.051
chromosome	3440915	G→T	I310I (ATC→ATA)	sll0723 ←	SYN	ORF_ID:sll0723; unknown protein	YES	YES		0.051		0.09	0.109	0.099	0.156					0.13	0.121		0.116		0.159		0.135		0.101	0.089	0.108	0.084	0.136	0.154	0.101
chromosome	3440919	G→T	S309* (TCA→TAA)	sll0723 ←	STOP	ORF_ID:sll0723; unknown protein	YES	YES	0.122		0.068	0.066	0.096	0.134	0.133	0.135	0.128	0.113	0.055	0.142	0.088		0.116	0.119	0.142	0.085	0.094	0.086	0.09	0.095		0.112	0.104	0.13	0.085
chromosome	3440929	C→A	D306Y (GAT→TAT)	sll0723 ←	NON	ORF_ID:sll0723; unknown protein	YES	YES	0.118		0.063	0.084	0.072	0.098			0.071	0.121	0.057	0.054	0.08	0.079	0.11		0.103	0.093	0.072	0.096	0.069	0.062	0.1	0.093	0.072	0.116
chromosome	3440934	C→A	S304I (AGT→ATT)	sll0723 ←	NON	ORF_ID:sll0723; unknown protein	YES	YES	0.095			0.07		0.078		0.058	0.073	0.07		0.062	0.06		0.066	0.069	0.075	0.077		0.085		0.079	0.052		0.071	0.07	0.052
chromosome	3440941	G→T	L302I (CTT→ATT)	sll0723 ←	NON	ORF_ID:sll0723; unknown protein	YES	NO													0.05
chromosome	3441553	C→A	D98Y (GAT→TAT)	sll0723 ←	NON	ORF_ID:sll0723; unknown protein	NO	YES																									0.058
chromosome	3442539	A→C	intergenic (‑695/+122)	sll0723 ← / ← sll0722	NC	ORF_ID:sll0723; unknown protein/ORF_ID:sll0722; unknown protein	NO	YES																							0.112
chromosome	3450391	G→T	G155V (GGA→GTA)	hlyB →	NON	haemolysin secretion ATP‑binding protein	NO	YES																		0.065					0.053
chromosome	3491003	G→T	L167I (CTA→ATA)	sll0445 ←	NON	ORF_ID:sll0445; unknown protein	NO	YES																										0.051
chromosome	3491031	A→C	A157A (GCT→GCG)	sll0445 ←	SYN	ORF_ID:sll0445; unknown protein	YES	YES													0.094										0.089		0.081
chromosome	3506907	C→A	P890T (CCA→ACA)	slr0454 →	NON	cation or drug efflux system protein	YES	YES		1	1	1	1	1	1	1	1	1	1	1	1	1	1	1	1	1	1	1	1	1	1	1	1	1	1
chromosome	3521007	T→G	T230P (ACG→CCG)	prfA ←	NON	peptide chain release factor	YES	NO												0.054
chromosome	3534417	C→G	L192V (CTG→GTG)	argG →	NON	argininosuccinate synthetase	NO	YES																0.311
chromosome	3534864	G→A	V341M (GTG→ATG)	argG →	NON	argininosuccinate synthetase	NO	YES																0.11
chromosome	3558729	A→C	S417R (AGC→CGC)	slr0599 →	NON	eukaryotic protein kinase	NO	YES																										0.061
chromosome	3565442	A→T	D202V (GAC→GTC)	lepA →	NON	LepA gene product	NO	YES																								0.052
chromosome	3569535	T→G	intergenic (+12/‑92)	slr0607 → / → hisI	NC	ORF_ID:slr0607; unknown protein/phosphoribosyl‑ATP pyrophosphohydrolase:phosphoribosyl‑AMP cyclohydrolase	YES	YES					0.068	0.053											0.061
chromosome	1,423,340:1	+A	coding (4312/5226 nt)	sll1951 ←	INDEL	hemolysin	NO	NO	1
pSYSM	14,539:1	+T	intergenic (+618/+40)	slr5005 → / ← sll5006	NC	ORF_ID:slr5005; hypothetical protein/unknown protein	YES	YES	0.306	0.275	0.237	0.214	0.264	0.286	0.279	0.263	0.222	0.22	0.236	0.253	0.264	0.249	0.295	0.253	0.263	0.278	0.235	0.296	0.11	0.132	0.234	0.246	0.24	0.117	0.25
chromosome	2,350,285:1	+A	intergenic (‑29/‑87)	psbI ← / → slr0363	NC	photosystem II PsbI protein/ORF_ID:slr0363; unknown protein	YES	YES	1	1	1	1	1	1	1	1	1	1	1	1	1	1	1	1	1	1	1	1	1	1	1	1	1	1	1
chromosome	2,360,246:1	+C	coding (8924/9090 nt)	slr0364 →	INDEL	ORF_ID:slr0364; unknown protein	YES	YES	1	1	1	1	1	1	1	1	1	1	1	1	1	1	1	1	1	1	1	1	1	1	1	1	1	1	1
chromosome	2,544,044:1	+C	coding (280/300 nt)	ssl0787 ←	INDEL	ORF_ID:ssl0787; unknown protein	YES	YES	1	1	1	1	1	1	1	1	1	1	1	1	1	1	1	1	1	1	1	1	1	1	1	1	1	1	1
chromosome	2,736,517:1	+T	coding (1275/1986 nt)	sll0182 ←	INDEL	ABC transporter	NO	NO	1
chromosome	442,222:1	+T	coding (59/1770 nt)	ycf45 →	INDEL	ORF_ID:slr0692; hypothetical protein	NO	YES																1

## Sheet: not LT_WT
genomic entity	position	mutation	annotation	locus	mut type	function	in FL0	in FL+	WT	LT_initial	LT_final	FL0_1	FL0_2	FL0_3	FL0_4	FL0_5	FL0_6	FL0_7	FL0_8	FL0_9	FL0_10	FL0_11	FL0_12	FL+_13	FL+_14	FL+_15	FL+_16	FL+_17	FL+_18	FL+_19	FL+_20	FL+_21	FL+_22	FL+_23	FL+_24
pSYSX	3282	C→T	intergenic (+229/‑223)	slr6001 → / → ssr6002	NC	two‑component hybrid sensor and regulator/ORF_ID:ssr6002	YES	NO				1
pSYSG	4849	C→A	D400Y (GAT→TAT)	sll8006 ←	NON	type I restriction‑modification system S subunit	YES	NO													0.051
pSYSA	6306	A→G	intergenic (‑22/‑43)	sll7009 ← / → slr7010	NC	unknown protein/unknown protein	NO	YES																1
pSYSG	11474	G→T	K159N (AAG→AAT)	slr8016 →	NON	plasmid partitioning protein	YES	NO					0.118
pSYSA	14283	A→T	Y21F (TAC→TTC)	slr7015 →	NON	ORF_ID:slr7015; hypothetical protein	NO	YES																											0.058
pSYSA	14360	G→T	E47* (GAA→TAA)	slr7015 →	STOP	ORF_ID:slr7015; hypothetical protein	YES	NO														0.058
pSYSA	17222	Δ935 bp	Δ935 bp	ssr7018–[ssl7019]	INDEL	ssr7018, [ssl7019]	YES	YES							1	1		1				1		1										1
pSYSM	17613	C→A	intergenic (+174/‑267)	ssr5011 → / → slr5012	NC	ORF_ID:ssr5011; hypothetical protein/ORF_ID:slr5012; hypothetical protein	NO	YES																						0.088
pSYSM	17623	C→A	intergenic (+184/‑257)	ssr5011 → / → slr5012	NC	ORF_ID:ssr5011; hypothetical protein/ORF_ID:slr5012; hypothetical protein	NO	YES																		0.057						0.055
pSYSM	17647	G→T	intergenic (+208/‑233)	ssr5011 → / → slr5012	NC	ORF_ID:ssr5011; hypothetical protein/ORF_ID:slr5012; hypothetical protein	YES	YES						0.056																			0.05
pSYSM	17656	C→A	intergenic (+217/‑224)	ssr5011 → / → slr5012	NC	ORF_ID:ssr5011; hypothetical protein/ORF_ID:slr5012; hypothetical protein	YES	YES						0.093			0.056			0.058		0.05						0.066				0.069	0.055
pSYSM	17668	C→A	intergenic (+229/‑212)	ssr5011 → / → slr5012	NC	ORF_ID:ssr5011; hypothetical protein/ORF_ID:slr5012; hypothetical protein	YES	YES											0.059							0.078		0.054
pSYSM	18456	G→T	G193* (GGA→TGA)	slr5012 →	STOP	ORF_ID:slr5012; hypothetical protein	NO	YES																								0.05
pSYSA	18985	T→G	intergenic (‑672/+104)	ssl7019 ← / ← ssl7020	NC	unknown protein/unknown protein	NO	YES																											0.057
pSYSG	20504	G→T	G189G (GGG→GGT)	slr8023 →	SYN	ORF_ID:slr8023; probable esterase	NO	YES																0.085
pSYSA	21171	G→T	V302V (GTG→GTT)	slr7023 →	SYN	ORF_ID:slr7023; hypothetical protein	YES	NO						0.055
pSYSA	21195	A→G	V310V (GTA→GTG)	slr7023 →	SYN	ORF_ID:slr7023; hypothetical protein	YES	NO						0.119
pSYSA	21198	G→T	E311D (GAG→GAT)	slr7023 →	NON	ORF_ID:slr7023; hypothetical protein	YES	NO						0.143
pSYSA	21260	C→T	P332L (CCA→CTA)	slr7023 →	NON	ORF_ID:slr7023; hypothetical protein	YES	NO						0.237
pSYSA	21261	A→G	P332P (CCA→CCG)	slr7023 →	SYN	ORF_ID:slr7023; hypothetical protein	YES	NO						0.251
pSYSA	21273	G→A	V336V (GTG→GTA)	slr7023 →	SYN	ORF_ID:slr7023; hypothetical protein	YES	NO						0.198
pSYSA	21276	T→G	D337E (GAT→GAG)	slr7023 →	NON	ORF_ID:slr7023; hypothetical protein	YES	NO						0.208
pSYSA	21809	C→T	S515L (TCG→TTG)	slr7023 →	NON	ORF_ID:slr7023; hypothetical protein	NO	YES																		0.059				0.06
pSYSA	21815	C→T	P517L (CCG→CTG)	slr7023 →	NON	ORF_ID:slr7023; hypothetical protein	NO	YES																		0.067				0.061
chromosome	24168	C→A	G326V (GGT→GTT)	sll1202 ←	NON	ORF_ID:sll1202; unknown protein	NO	YES																									0.06
pSYSG	24983	G→T	intergenic (+122/‑164)	slr8029 → / → slr8030	NC	resolvase/ORF_ID:slr8030; hypothetical protein	NO	YES																					0.052
pSYSG	25218	G→A	R24R (CGG→CGA)	slr8030 →	SYN	ORF_ID:slr8030; hypothetical protein	YES	NO												0.059
pSYSG	27416	C→A	T199T (ACG→ACT)	ndhK2 ←	SYN	NADH dehydrogenase subunit	YES	NO												0.08
pSYSG	36173	A→C	K1159T (AAG→ACG)	slr8038 →	NON	WD‑repeat protein	NO	YES																		0.103
pSYSA	37628	T→G	S171R (AGT→CGT)	sll7043 ←	NON	unknown protein	NO	YES																						0.08
pSYSM	39206	G→C	G71G (GGG→GGC)	slr5040 →	SYN	transposase	NO	YES																								1
chromosome	44341	G→T	A257A (GCG→GCT)	fecB →	SYN	iron(III) dicitrate‑binding periplasmic protein	NO	YES																								0.08
pSYSM	44691	G→T	R389S (CGC→AGC)	sll5047 ←	NON	unknown protein	YES	NO														0.063
pSYSA	49334	A→G	N182S (AAC→AGC)	slr7059 →	NON	ORF_ID:slr7059; hypothetical protein	NO	YES																								0.721
pSYSM	56860	A→C	A316A (GCT→GCG)	sll5057 ←	SYN	ORF_ID:sll5057; probable glycosyltransferase	NO	YES																		0.051
pSYSM	56871	G→T	R313S (CGT→AGT)	sll5057 ←	NON	ORF_ID:sll5057; probable glycosyltransferase	YES	YES											0.062													0.069
pSYSM	62712	T→G	K707T (AAA→ACA)	sll5060 ←	NON	two‑component hybrid sensor and regulator	YES	YES				0.053						0.06													0.051	0.06
pSYSM	67884	T→A	K31N (AAA→AAT)	sll5066 ←	NON	ORF_ID:sll5066; probable plasmid partitioning protein, ParA family	NO	YES																						0.061
pSYSA	68609	191 bp→41 bp	intergenic (‑633/‑580)	sll7075 ← / → slr7076	NC	unknown protein/ORF_ID:slr7076; hypothetical protein	NO	YES																										1
pSYSA	68609	Δ77 bp	intergenic (‑633/‑694)	sll7075 ← / → slr7076	NC	unknown protein/ORF_ID:slr7076; hypothetical protein	YES	YES				1	1	1	1	1	1	1	1	1	1	1	1	1	1	1	1	1	1	1	1	1	1		1
pSYSA	70438	Δ75 bp	intergenic (+670/+2366)	slr7076 → / ← sll7077	NC	ORF_ID:slr7076; hypothetical protein/ORF_ID:sll7077; hypothetical protein	NO	YES																1
pSYSA	70740	Δ77 bp	intergenic (+972/+2062)	slr7076 → / ← sll7077	NC	ORF_ID:slr7076; hypothetical protein/ORF_ID:sll7077; hypothetical protein	YES	YES				1	1	1	1	1	1	1	1	1	1	1	1	1	1		1	1	1	1	1	1	1	1	1
pSYSA	72086	Δ150 bp	intergenic (+2318/+643)	slr7076 → / ← sll7077	NC	ORF_ID:slr7076; hypothetical protein/ORF_ID:sll7077; hypothetical protein	YES	YES				1	1	1	1	1	1	1	1	1	1	1	1	1	1	1	1	1	1	1	1	1	1	1	1
chromosome	77107	A→C	Y101D (TAT→GAT)	dapB ←	NON	dihydrodipicolinate reductase	YES	NO											0.053
chromosome	81579	C→A	G214G (GGC→GGA)	slr1122 →	SYN	ORF_ID:slr1122; unknown protein	NO	YES																				0.068
chromosome	81633	C→A	V232V (GTC→GTA)	slr1122 →	SYN	ORF_ID:slr1122; unknown protein	YES	NO						0.06
chromosome	83741	T→G	K38T (AAA→ACA)	sll1053 ←	NON	ORF_ID:sll1053; hypothetical protein	YES	YES				0.071							0.079	0.092						0.057	0.06		0.065		0.061		0.057
chromosome	86293	A→C	L45L (CTA→CTC)	crtX →	SYN	zeaxanthin glucosyl transferase	YES	YES					0.05	0.063																		0.071	0.061	0.074
pSYSX	90184	T→G	F68C (TTT→TGT)	slr6096 →	NON	ORF_ID:slr6096; type I restriction‑modification system, M subunit (fragment)	YES	NO						0.059
pSYSX	92679	G→T	S222Y (TCC→TAC)	sll6098 ←	NON	ORF_ID:sll6098; hypothetical protein	YES	YES						0.064																		0.053
pSYSX	92723	C→A	L207F (TTG→TTT)	sll6098 ←	NON	ORF_ID:sll6098; hypothetical protein	YES	YES				0.064	0.103	0.067		0.056										0.065
pSYSX	92730	G→T	T205N (ACT→AAT)	sll6098 ←	NON	ORF_ID:sll6098; hypothetical protein	YES	NO														0.051
pSYSX	92740	A→C	L202V (TTG→GTG)	sll6098 ←	NON	ORF_ID:sll6098; hypothetical protein	YES	NO					0.081
pSYSA	95242	G→T	L175F (TTG→TTT)	slr7097 →	NON	ORF_ID:slr7097; hypothetical protein	NO	YES																								0.056
pSYSM	96439	G→T	E106* (GAA→TAA)	slr5101 →	STOP	ORF_ID:slr5101; hypothetical protein	YES	YES															0.075								0.053
pSYSM	96448	T→A	Y109N (TAC→AAC)	slr5101 →	NON	ORF_ID:slr5101; hypothetical protein	YES	YES														0.056										0.059
pSYSM	96458	G→T	G112V (GGA→GTA)	slr5101 →	NON	ORF_ID:slr5101; hypothetical protein	YES	NO							0.068
pSYSM	106152	T→G	N74H (AAC→CAC)	ssl5114 ←	NON	unknown protein	YES	YES						0.064			0.106												0.082
pSYSM	106798	C→A	L88I (CTA→ATA)	slr5115 →	NON	ORF_ID:slr5115; hypothetical protein	NO	YES																								0.065
chromosome	124629	G→C	F605L (TTC→TTG)	dfr ←	NON	drug sensory protein A	NO	YES																		1
chromosome	125267	T→C	T393A (ACC→GCC)	dfr ←	NON	drug sensory protein A	NO	YES																	1		1
chromosome	134961	A→C	K175N (AAA→AAC)	infB →	NON	initiation factor IF‑2	YES	NO											0.061
chromosome	156743	A→T	*91K (TAA→AAA)	ssl0410 ←	NON	ORF_ID:ssl0410; unknown protein	YES	YES												0.089							0.057
chromosome	190150	T→G	L40V (TTG→GTG)	slr1094 →	NON	ORF_ID:slr1094; unknown protein	YES	NO													0.163
chromosome	190153	A→T	S41C (AGT→TGT)	slr1094 →	NON	ORF_ID:slr1094; unknown protein	YES	YES				0.125															0.126
chromosome	190160	A→T	E43V (GAG→GTG)	slr1094 →	NON	ORF_ID:slr1094; unknown protein	NO	YES																			0.065
chromosome	217642	A→C	V229G (GTT→GGT)	ccmM ←	NON	carbon dioxide concentrating mechanism protein; CcmM	YES	NO											0.054
chromosome	246673	A→C	F116C (TTT→TGT)	malQ ←	NON	4‑alpha‑glucanotransferase	NO	YES																								0.057
chromosome	277327	G→T	W300L (TGG→TTG)	slr1799 →	NON	ORF_ID:slr1799; unknown protein	NO	YES																				0.056
chromosome	278254	T→G	L609R (CTT→CGT)	slr1799 →	NON	ORF_ID:slr1799; unknown protein	NO	YES																											0.112
chromosome	297208	G→T	L711F (TTG→TTT)	slr1298 →	NON	ORF_ID:slr1298; hypothetical protein	NO	YES																				0.064
chromosome	297223	G→T	L716F (TTG→TTT)	slr1298 →	NON	ORF_ID:slr1298; hypothetical protein	NO	YES																			0.056	0.088
chromosome	305454	T→G	L506V (TTG→GTG)	slr1301 →	NON	ORF_ID:slr1301; unknown protein	NO	YES																									0.092
chromosome	305471	G→T	L511F (TTG→TTT)	slr1301 →	NON	ORF_ID:slr1301; unknown protein	YES	NO											0.057
chromosome	312637	T→G	L127R (CTA→CGA)	slr1306 →	NON	ORF_ID:slr1306; unknown protein	NO	YES																					0.052
chromosome	321719	T→G	A7A (GCT→GCG)	sir →	SYN	ferredoxin‑sulfite reductase	YES	NO								0.05
chromosome	321738	A→C	K14Q (AAG→CAG)	sir →	NON	ferredoxin‑sulfite reductase	NO	YES																							0.057
chromosome	321742	T→G	V15G (GTA→GGA)	sir →	NON	ferredoxin‑sulfite reductase	YES	NO									0.065
chromosome	331716	A→C	Q191H (CAA→CAC)	cbiH →	NON	precorrin methylase	YES	NO												0.086
chromosome	335959	T→C	S113G (AGC→GGC)	sll0933 ←	NON	ORF_ID:sll0933; unknown protein	YES	YES				1	1	1	1	1	1	1	1	1	1	1	1	1	1	1	1	1	1	1	1	1	1	1	1
chromosome	347692	T→A	R39W (AGG→TGG)	epsB ←	NON	exopolysaccharide export protein	NO	YES																				0.081
chromosome	347699	A→C	G36G (GGT→GGG)	epsB ←	SYN	exopolysaccharide export protein	YES	NO														0.05
chromosome	347715	A→C	L31R (CTT→CGT)	epsB ←	NON	exopolysaccharide export protein	YES	YES							0.091												0.09
chromosome	347820	A→C	intergenic (‑14/+564)	epsB ← / ← sll0922	NC	exopolysaccharide export protein/ORF_ID:sll0922; unknown protein	YES	NO															0.063
chromosome	365954	G→T	S80I (AGT→ATT)	slr1063 →	NON	ORF_ID:slr1063; hypothetical protein	YES	NO				0.126
chromosome	372754	G→T	intergenic (+245/‑57)	galE → / → slr1068	NC	UDP‑glucose‑4‑epimerase/ORF_ID:slr1068; unknown protein	YES	NO												0.06
chromosome	372792	G→T	intergenic (+283/‑19)	galE → / → slr1068	NC	UDP‑glucose‑4‑epimerase/ORF_ID:slr1068; unknown protein	YES	NO															0.073
chromosome	379321	C→T	A86V (GCC→GTC)	slr1075 →	NON	transposase	NO	YES																									0.061
chromosome	389818	T→G	Q179P (CAG→CCG)	sll1025 ←	NON	ORF_ID:sll1025; unknown protein	YES	NO					0.1
chromosome	389827	T→G	N176T (AAC→ACC)	sll1025 ←	NON	ORF_ID:sll1025; unknown protein	YES	YES													0.108											0.07
chromosome	418522	C→A	A441E (GCA→GAA)	fmu_fmv →	NON	Fmu and Fmv protein	NO	YES																				0.119	0.062						0.072
chromosome	442494	Δ13 bp	coding (331‑343/1770 nt)	ycf45 →	INDEL	ORF_ID:slr0692; hypothetical protein	NO	YES																				1
chromosome	443761	A→G	E533G (GAA→GGA)	ycf45 →	NON	ORF_ID:slr0692; hypothetical protein	NO	YES																					1
chromosome	470037	A→C	N149T (AAC→ACC)	slr1603 →	NON	ORF_ID:slr1603; hypothetical protein	NO	YES																		0.08					0.103
chromosome	489322	T→A	L679H (CTC→CAC)	slr1609 →	NON	long‑chain‑fatty‑acid CoA ligase	NO	YES																							0.074
chromosome	489325	A→C	K680T (AAA→ACA)	slr1609 →	NON	long‑chain‑fatty‑acid CoA ligase	NO	YES																									0.076
chromosome	501564	C→G	E143Q (GAA→CAA)	sll1011 ←	NON	ORF_ID:sll1011; hypothetical protein	YES	YES								0.12																		0.147
chromosome	501571	A→T	H140Q (CAT→CAA)	sll1011 ←	NON	ORF_ID:sll1011; hypothetical protein	YES	YES					0.06			0.05		0.068	0.079						0.056		0.059						0.054
chromosome	501596	T→G	N132T (AAC→ACC)	sll1011 ←	NON	ORF_ID:sll1011; hypothetical protein	YES	NO						0.052						0.06	0.098	0.07	0.079
chromosome	501602	T→G	N130T (AAC→ACC)	sll1011 ←	NON	ORF_ID:sll1011; hypothetical protein	YES	NO													0.065
chromosome	501607	C→G	Q128H (CAG→CAC)	sll1011 ←	NON	ORF_ID:sll1011; hypothetical protein	YES	YES													0.122							0.062
chromosome	527495	Δ24 bp	coding (3150‑3173/5250 nt)	slr1753 →	INDEL	ORF_ID:slr1753; unknown protein	YES	NO															0.097
chromosome	527495	Δ42 bp	coding (3150‑3191/5250 nt)	slr1753 →	INDEL	ORF_ID:slr1753; unknown protein	YES	NO				0.057
chromosome	527588	T→G	P1081P (CCT→CCG)	slr1753 →	SYN	ORF_ID:slr1753; unknown protein	YES	NO														0.139
chromosome	527672	T→C	P1109P (CCT→CCC)	slr1753 →	SYN	ORF_ID:slr1753; unknown protein	YES	NO					0.07
chromosome	527837	A→T	E1164D (GAA→GAT)	slr1753 →	NON	ORF_ID:slr1753; unknown protein	NO	YES																	0.188
chromosome	530947	A→T	W97R (TGG→AGG)	sll1647 ←	NON	ORF_ID:sll1647; hypothetical protein	NO	YES																	1		1
chromosome	552987	G→T	intergenic (‑120/+78)	sll1635 ← / ← psbK	NC	ORF_ID:sll1635; Thy1 protein homologue/photosystem II PsbK protein	YES	NO					0.057
chromosome	553008	C→A	intergenic (‑141/+57)	sll1635 ← / ← psbK	NC	ORF_ID:sll1635; Thy1 protein homologue/photosystem II PsbK protein	NO	YES																						0.073
chromosome	555586	T→G	L109V (TTG→GTG)	slr1847 →	NON	ORF_ID:slr1847; hypothetical protein	NO	YES																	0.109
chromosome	576469	A→C	P145P (CCT→CCG)	sll1942 ←	SYN	ORF_ID:sll1942; unknown protein	NO	YES																										0.082
chromosome	577060	A→T	N903K (AAT→AAA)	gyrA ←	NON	DNA gyrase A subunit	NO	YES																											0.074
chromosome	589750	T→C	A841A (GCT→GCC)	slr2046 →	SYN	Fat protein	NO	YES																					1	1	1
chromosome	614842	T→G	M1R (ATG→AGG) †	slr1911 →	NON	ORF_ID:slr1911; unknown protein	YES	NO													0.057
chromosome	614860	T→G	I7R (ATA→AGA)	slr1911 →	NON	ORF_ID:slr1911; unknown protein	YES	YES													0.07						0.087
chromosome	630595	T→G	K333T (AAG→ACG)	sll0998 ←	NON	LysR transcriptional regulator	NO	YES																											0.086
chromosome	630606	T→G	Q329H (CAA→CAC)	sll0998 ←	NON	LysR transcriptional regulator	YES	YES										0.09										0.098
chromosome	630619	T→G	N325T (AAC→ACC)	sll0998 ←	NON	LysR transcriptional regulator	NO	YES																		0.054
chromosome	664693	A→C	L30V (TTG→GTG)	sll0986 ←	NON	transposase	YES	YES						0.054																0.062
chromosome	693714	C→T	V500M (GTG→ATG)	rnb ←	NON	ribonuclease II	NO	YES																				1
chromosome	695220	C→A	intergenic (‑9/+70)	rnb ← / ← sll1289	NC	ribonuclease II/ORF_ID:sll1289; unknown protein	YES	NO													1
chromosome	700275	T→G	F436V (TTC→GTC)	feoB →	NON	ferrous iron transport protein B	YES	NO													0.057
chromosome	714463	G→T	intergenic (‑285/+2)	sll1584 ← / ← lig	NC	ORF_ID:sll1584; unknown protein/DNA ligase	NO	YES																								0.059
chromosome	715293	T→G	E287D (GAA→GAC)	lig ←	NON	DNA ligase	NO	YES																									0.066
chromosome	724422	A→C	intergenic (‑77/+70)	cpcD ← / ← cpcC	NC	phycocyanin associated linker protein/phycocyanin associated linker protein	NO	YES																								0.101
chromosome	727349	A→G	S40P (TCT→CCT)	cpcB ←	NON	phycocyanin b subunit	NO	YES																						1	1
chromosome	735170	A→C	P62P (CCA→CCC)	slr1708 →	SYN	lysostaphin	NO	YES																		0.079							0.052
chromosome	755888	A→C	intergenic (‑286/‑165)	sll1924 ← / → slr2015	NC	ORF_ID:sll1924; hypothetical protein/ORF_ID:slr2015; unknown protein	NO	YES																		0.059
chromosome	755992	G→C	intergenic (‑390/‑61)	sll1924 ← / → slr2015	NC	ORF_ID:sll1924; hypothetical protein/ORF_ID:slr2015; unknown protein	NO	YES																							0.058
chromosome	784869	T→A	V34D (GTC→GAC)	slr1134 →	NON	ORF_ID:slr1134; hypothetical protein	YES	YES													0.067												0.071		0.082
chromosome	815288	G→T	S497I (AGT→ATT)	slr1149 →	NON	ABC transporter	YES	NO									0.065
chromosome	828820	C→T	D82N (GAT→AAT)	rpl17 ←	NON	50S ribosomal protein L17	YES	NO															0.052
chromosome	831484	C→A	L25F (TTG→TTT)	infA ←	NON	initiation factor IF‑1	NO	YES																										0.126
chromosome	831493	G→T	F22L (TTC→TTA)	infA ←	NON	initiation factor IF‑1	YES	NO				0.075
chromosome	832302	C→A	intergenic (‑37/+89)	adk ← / ← secY	NC	adenylate kinase/preprotein translocase SecY subunit	NO	YES																1
chromosome	858495	G→T	T791N (ACC→AAC)	rpoB ←	NON	RNA polymerase beta subunit	NO	YES																									1	1	1
chromosome	865764	A→C	I205S (ATT→AGT)	sll1124 ←	NON	sensory transduction histidine kinase	YES	YES										0.085													0.063			0.063
chromosome	865785	A→C	L198R (CTG→CGG)	sll1124 ←	NON	sensory transduction histidine kinase	YES	YES										0.072											0.058
chromosome	871563	A→C	L570V (TTG→GTG)	sll1120 ←	NON	chromosome segregation protein SMC1	YES	YES														0.154				0.137					0.166		0.109
chromosome	902704	T→A	T106T (ACT→ACA)	slr1215 →	SYN	ORF_ID:slr1215; unknown protein	NO	YES																									0.052
chromosome	923835	C→A	G2V (GGA→GTA)	rpl10 ←	SYN	50S ribosomal protein L10	NO	YES																							0.055
chromosome	923861	T→G	intergenic (‑22/+225)	rpl10 ← / ← rpl1	NC	50S ribosomal protein L10/50S ribosomal protein L1	NO	YES																									0.093
chromosome	969966	G→T	T285T (ACC→ACA)	hisC ←	SYN	histidinol‑phosphate aminotransferase	YES	NO							0.081
chromosome	989034	T→G	T158P (ACG→CCG)	sll1464 ←	NON	ORF_ID:sll1464; hypothetical protein	YES	YES														0.079				0.076
chromosome	989035	T→G	E157D (GAA→GAC)	sll1464 ←	NON	ORF_ID:sll1464; hypothetical protein	YES	YES												0.056						0.077
chromosome	996540	A→C	E422D (GAA→GAC)	lysS →	NON	lysyl‑tRNA synthetase	YES	YES														0.091								0.093
chromosome	1007846	T→G	K134T (AAA→ACA)	nrtC ←	NON	nitrate transport protein; NrtC	NO	YES																			0.119
chromosome	1007860	T→G	Q129H (CAA→CAC)	nrtC ←	NON	nitrate transport protein; NrtC	YES	YES						0.098																	0.116
chromosome	1030834	T→G	L214V (TTG→GTG)	purC →	NON	phosphoribosyl aminoidazole succinocarboxamide synthetase	YES	YES												0.102	0.071												0.102
chromosome	1030851	G→C	Q219H (CAG→CAC)	purC →	NON	phosphoribosyl aminoidazole succinocarboxamide synthetase	NO	YES																						0.063
chromosome	1059576	A→C	N347T (AAT→ACT)	pmbA →	NON	PmbA protein	YES	NO							0.051
chromosome	1065939	T→G	K1024N (AAA→AAC)	dnaX ←	NON	DNA polymerase III subunit	YES	NO												0.059
chromosome	1066022	T→G	R997R (AGG→CGG)	dnaX ←	SYN	DNA polymerase III subunit	YES	NO				0.063						0.067	0.05		0.079	0.05
chromosome	1066233	T→G	E926D (GAA→GAC)	dnaX ←	NON	DNA polymerase III subunit	YES	NO										0.08
chromosome	1123506	G→T	Q176K (CAA→AAA)	sll1267 ←	NON	ORF_ID:sll1267; unknown protein	YES	NO					0.069
chromosome	1137531	T→G	F53V (TTT→GTT)	slr0878 →	NON	ORF_ID:slr0878; hypothetical protein	YES	NO													0.057
chromosome	1137538	C→G	S55C (TCC→TGC)	slr0878 →	NON	ORF_ID:slr0878; hypothetical protein	NO	YES																									0.061
chromosome	1144595	C→A	intergenic (+364/‑133)	slr0882 → / → psr	NC	ORF_ID:slr0882; unknown protein/regulation of penicillin binding protein 5 production	NO	YES																									0.069
chromosome	1144864	A→C	K46T (AAG→ACG)	psr →	NON	regulation of penicillin binding protein 5 production	NO	YES																		0.059
chromosome	1172808	A→C	E746D (GAA→GAC)	slr1403 →	NON	ORF_ID:slr1403; integrin alpha‑ and beta4‑ subunit domain homologue	YES	NO												0.054
chromosome	1178173	C→G	R2535G (CGT→GGT)	slr1403 →	NON	ORF_ID:slr1403; integrin alpha‑ and beta4‑ subunit domain homologue	YES	NO				0.054
chromosome	1178245	A→C	N2559H (AAC→CAC)	slr1403 →	NON	ORF_ID:slr1403; integrin alpha‑ and beta4‑ subunit domain homologue	NO	YES																				0.052
chromosome	1178289	T→G	V2573V (GTT→GTG)	slr1403 →	SYN	ORF_ID:slr1403; integrin alpha‑ and beta4‑ subunit domain homologue	YES	YES							0.05	0.054					0.053					0.051				0.061
chromosome	1178304	T→G	A2578A (GCT→GCG)	slr1403 →	SYN	ORF_ID:slr1403; integrin alpha‑ and beta4‑ subunit domain homologue	YES	YES									0.082									0.101				0.113
chromosome	1178322	T→G	T2584T (ACT→ACG)	slr1403 →	SYN	ORF_ID:slr1403; integrin alpha‑ and beta4‑ subunit domain homologue	NO	YES																		0.082				0.085				0.058
chromosome	1178329	A→C	T2587P (ACT→CCT)	slr1403 →	NON	ORF_ID:slr1403; integrin alpha‑ and beta4‑ subunit domain homologue	YES	NO										0.055
chromosome	1275418	A→T	M247K (ATG→AAG)	sll1710 ←	NON	transposase	NO	YES																									0.07
chromosome	1275437	G→T	P241T (CCT→ACT)	sll1710 ←	NON	transposase	NO	YES																									0.075
chromosome	1287745	T→G	N340T (AAC→ACC)	sll1699 ←	NON	extracellular solute‑binding protein	NO	YES																									0.058
chromosome	1288841	T→G	N91T (AAT→ACT)	sll1698 ←	NON	ORF_ID:sll1698; unknown protein	NO	YES																		0.055
chromosome	1311321	G→T	intergenic (+87/‑507)	nth → / → slr1732	NC	endonuclease III/ORF_ID:slr1732; unknown protein	NO	YES																						0.059
chromosome	1329229	A→G	noncoding (8/74 nt)	trnD‑GUC ←	NC	trnD‑GUC	NO	YES																								1
chromosome	1336429	C→A	P287T (CCT→ACT)	slr1747 →	NON	ORF_ID:slr1747; hypothetical protein	NO	YES																				0.065	0.105				0.073
chromosome	1364962	G→T	P168T (CCC→ACC)	sll0837 ←	NON	ORF_ID:sll0837; unknown protein	YES	NO									0.069
chromosome	1364993	C→A	L157F (TTG→TTT)	sll0837 ←	NON	ORF_ID:sll0837; unknown protein	YES	NO								0.062
chromosome	1364997	T→A	D156V (GAT→GTT)	sll0837 ←	NON	ORF_ID:sll0837; unknown protein	NO	YES																	0.114
chromosome	1371729	T→G	W188G (TGG→GGG)	slr0872 →	NON	ORF_ID:slr0872; unknown protein	YES	NO				0.06			0.051
chromosome	1375727	G→T	G126V (GGA→GTA)	slr1243 →	NON	ORF_ID:slr1243; unknown protein	NO	YES																										0.067
chromosome	1375780	G→T	D144Y (GAT→TAT)	slr1243 →	NON	ORF_ID:slr1243; unknown protein	NO	YES																										0.068
chromosome	1375786	G→T	D146Y (GAT→TAT)	slr1243 →	NON	ORF_ID:slr1243; unknown protein	YES	NO											0.053
chromosome	1381040	A→T	I284N (ATC→AAC)	sll1161 ←	NON	adenylate cyclase	YES	NO														0.061
chromosome	1381056	T→G	R279R (AGG→CGG)	sll1161 ←	SYN	adenylate cyclase	NO	YES																		0.066
chromosome	1384680	G→T	D285Y (GAT→TAT)	slr1245 →	NON	transcriptional regulator	NO	YES																								0.059
chromosome	1388614	G→T	intergenic (‑318/‑298)	norA ← / → pstS	NC	quinolene resistance protein; NorA/periplasmic phosphate binding protein	NO	YES																				0.071
chromosome	1388637	C→A	intergenic (‑341/‑275)	norA ← / → pstS	NC	quinolene resistance protein; NorA/periplasmic phosphate binding protein	YES	YES					0.09																				0.069
chromosome	1393381	A→T	E137V (GAA→GTA)	cyp →	NON	peptidyl‑prolyl cis‑trans isomerase	YES	NO														0.068
chromosome	1405598	A→C	S55R (AGC→CGC)	slr1261 →	NON	ORF_ID:slr1261; hypothetical protein	NO	YES																											0.069
chromosome	1409502	G→T	Q50K (CAA→AAA)	sll1961 ←	NON	ORF_ID:sll1961; unknown protein	YES	NO											0.062
chromosome	1413986	ISY100 (–) +2 bp	intergenic (+320/‑139)	apqZ → / → topA	NC	water channel protein/DNA topoisomerase I	YES	NO											1
chromosome	1414572	A→T	E149D (GAA→GAT)	topA →	NON	DNA topoisomerase I	NO	YES																	1		1
chromosome	1415589	T→G	A488A (GCT→GCG)	topA →	SYN	DNA topoisomerase I	YES	NO													0.058
chromosome	1415635	A→G	T504A (ACC→GCC)	topA →	NON	DNA topoisomerase I	NO	YES																					1	1	1
chromosome	1417306	A→C	Q8P (CAA→CCA)	slr2060 →	NON	ORF_ID:slr2060; unknown protein	YES	YES														0.069									0.058
chromosome	1417320	T→G	F13V (TTT→GTT)	slr2060 →	NON	ORF_ID:slr2060; unknown protein	NO	YES																									0.079
chromosome	1417347	T→G	L22V (TTA→GTA)	slr2060 →	NON	ORF_ID:slr2060; unknown protein	YES	YES														0.06				0.078							0.053
chromosome	1417388	T→G	R35R (CGT→CGG)	slr2060 →	SYN	ORF_ID:slr2060; unknown protein	YES	NO										0.063
chromosome	1421538	T→A	I200N (ATC→AAC)	slr2062 →	NON	transposase	NO	YES																								0.06
chromosome	1427050	A→C	L201R (CTA→CGA)	sll1951 ←	NON	hemolysin	NO	YES																						0.064
chromosome	1428081	T→G	intergenic (‑430/+115)	sll1951 ← / ← sll1950	NC	hemolysin/ORF_ID:sll1950; unknown protein	YES	YES												0.103						0.078
chromosome	1432903	Δ4 bp	intergenic (‑5/+70)	prmA ← / ← serA	NC	ribosomal protein L11 methyltransferase; PrmA/phosphoglycerate dehydrogenase	NO	YES																								1
chromosome	1438340	C→A	T323N (ACC→AAC)	thl →	NON	acetyl coenzyme A acetyltransferase (thiolase)	YES	NO														0.071
chromosome	1449671	A→C	T538P (ACG→CCG)	slr2002 →	NON	ORF_ID:slr2002; unknown protein	YES	YES				0.057												0.063							0.057
chromosome	1451658	T→G	E287D (GAA→GAC)	sll1902 ←	NON	ORF_ID:sll1902; hypothetical protein	NO	YES																								0.089
chromosome	1482024	T→A	S47C (AGT→TGT)	mntA ←	NON	Mn transporter; MntA	NO	YES																									0.075
chromosome	1489195	A→C	Y118S (TAT→TCT)	slr1727 →	NON	eukaryotic Na+/H+ exchanger	YES	NO												0.069	0.065
chromosome	1489197	T→G	W119G (TGG→GGG)	slr1727 →	NON	eukaryotic Na+/H+ exchanger	NO	YES																						0.059
chromosome	1510868	T→A	A293A (GCT→GCA)	ndhH →	SYN	NADH dehydrogenase subunit 7	NO	YES																								0.109
chromosome	1513936	G→T	E238* (GAA→TAA)	slr0265 →	STOP	transposase	NO	YES																										0.055
chromosome	1513955	G→C	S244T (AGT→ACT)	slr0265 →	NON	transposase	YES	NO				0.07
chromosome	1514391	G→T	S316R (AGC→AGA)	dfp ←	NON	pantothenate metabolism flavoprotein	YES	NO										0.117
chromosome	1519401	C→A	A96A (GCC→GCA)	slr0267 →	SYN	ORF_ID:slr0267; hypothetical protein	YES	NO															0.054
chromosome	1519410	A→C	K99N (AAA→AAC)	slr0267 →	NON	ORF_ID:slr0267; hypothetical protein	NO	YES																				0.056
chromosome	1519435	G→T	V108F (GTT→TTT)	slr0267 →	NON	ORF_ID:slr0267; hypothetical protein	YES	NO														0.067
chromosome	1520192	T→G	Q303H (CAA→CAC)	sll0245 ←	NON	ORF_ID:sll0245; hypothetical protein	YES	YES				0.06								0.061										0.064
chromosome	1529015	A→T	P749P (CCT→CCA)	sll0242 ←	SYN	ORF_ID:sll0242; unknown protein	YES	NO										0.05
chromosome	1559508	A→T	L35Q (CTA→CAA)	trxA ←	NON	thiol:disulfide interchange protein; TrxA	YES	NO												0.056
chromosome	1559546	A→C	V22V (GTT→GTG)	trxA ←	SYN	thiol:disulfide interchange protein; TrxA	YES	NO										0.083
chromosome	1570385	A→C	E59D (GAA→GAC)	ftsY →	NON	cell division protein; FtsY	YES	YES					0.066						0.053	0.075								0.063
chromosome	1570415	T→G	D69E (GAT→GAG)	ftsY →	NON	cell division protein; FtsY	YES	YES				0.076															0.05
chromosome	1590606	T→G	P37P (CCT→CCG)	slr1506 →	SYN	ORF_ID:slr1506; unknown protein	YES	NO														0.059
chromosome	1591662	T→G	F389L (TTT→TTG)	slr1506 →	NON	ORF_ID:slr1506; unknown protein	NO	YES																								0.074
chromosome	1594769	A→T	K217N (AAA→AAT)	slr1508 →	NON	ORF_ID:slr1508; unknown protein	NO	YES																								0.058
chromosome	1594775	G→T	W219C (TGG→TGT)	slr1508 →	NON	ORF_ID:slr1508; unknown protein	NO	YES																										0.069
chromosome	1594826	C→A	G236G (GGC→GGA)	slr1508 →	SYN	ORF_ID:slr1508; unknown protein	NO	YES																								0.141
chromosome	1595795	G→T	A171S (GCC→TCC)	ntpJ →	NON	Na+ ‑ATPase subunit J	YES	NO														0.064
chromosome	1599975	G→T	intergenic (‑437/‑684)	sll1418 ← / → slr1512	NC	ORF_ID:sll1418; unknown protein/ORF_ID:slr1512; unknown protein	YES	YES				0.106																0.074
chromosome	1603727	C→A	A145S (GCC→TCC)	sll1414 ←	NON	ORF_ID:sll1414; hypothetical protein	YES	NO								0.054
chromosome	1611274	T→G	V183G (GTT→GGT)	hglK →	NON	HglK	YES	YES								0.079														0.053
chromosome	1611385	T→A	L220Q (CTG→CAG)	hglK →	NON	HglK	YES	NO											0.076
chromosome	1612753	A→C	intergenic (+124/‑44)	slr1520 → / → hflX	NC	ORF_ID:slr1520; unknown protein/GTP‑binding protein; HflX	NO	YES																		0.052
chromosome	1634322	A→C	N301H (AAC→CAC)	slr2120 →	NON	ORF_ID:slr2120; unknown protein	YES	YES						0.057																					0.056
chromosome	1634399	T→G	P326P (CCT→CCG)	slr2120 →	SYN	ORF_ID:slr2120; unknown protein	YES	NO				0.054
chromosome	1640058	G→C	E39Q (GAA→CAA)	slr2127 →	NON	ORF_ID:slr2127; unknown protein	NO	YES																									0.051
chromosome	1656076	A→C	I12L (ATT→CTT)	spoT →	NON	(p)ppGpp 3'‑pyrophosphohydrolase	NO	YES																						0.055
chromosome	1670607	A→T	M503L (ATG→TTG)	ymxG →	NON	processing protease	NO	YES																				0.05
chromosome	1670664	G→T	G5G (GGG→GGT)	fabF →	SYN	beta ketoacyl‑acyl carrier protein synthase	NO	YES																									0.103
chromosome	1680156	G→T	intergenic (+352/‑506)	ssr2227 → / → slr1334	NC	transposase/ORF_ID:slr1334; unknown protein	YES	NO					0.066
chromosome	1683763	T→A	Q166H (CAA→CAT)	sll1217 ←	NON	ORF_ID:sll1217; unknown protein	NO	YES																							0.058
chromosome	1693782	G→A	Q294* (CAG→TAG)	sll0816 ←	STOP	ORF_ID:sll0816; hypothetical protein	NO	YES																				0.607
chromosome	1695943	A→C	V285V (GTT→GTG)	sll0814 ←	SYN	ORF_ID:sll0814; unknown protein	YES	YES													0.067					0.067
chromosome	1703520	T→A	K193M (AAG→ATG)	sll0809 ←	NON	ORF_ID:sll0809; unknown protein	YES	YES												0.06								0.061		0.081
chromosome	1703572	G→T	Q176K (CAA→AAA)	sll0809 ←	NON	ORF_ID:sll0809; unknown protein	YES	NO					0.066
chromosome	1709428	T→G	V66G (GTT→GGT)	slr0820 →	NON	glucosyltransferase	YES	NO												0.092
chromosome	1709429	T→G	V66V (GTT→GTG)	slr0820 →	SYN	glucosyltransferase	YES	YES															0.057						0.082					0.058	0.05
chromosome	1709627	T→G	R132R (CGT→CGG)	slr0820 →	SYN	glucosyltransferase	YES	YES											0.066	0.054													0.053
chromosome	1764138	A→C	Y138S (TAT→TCT)	slr1962 →	NON	ORF_ID:slr1962; unknown protein	YES	NO										0.069
chromosome	1771734	T→G	A170A (GCA→GCC)	hisF ←	SYN	cyclase	NO	YES																		0.064					0.079
chromosome	1771752	T→G	E164D (GAA→GAC)	hisF ←	NON	cyclase	YES	YES									0.064									0.058	0.063		0.054
chromosome	1773235	A→C	intergenic (‑32/‑111)	sll1892 ← / → slr1968	NC	ORF_ID:sll1892; unknown protein/ORF_ID:slr1968; unknown protein	YES	YES				0.063																0.058	0.058
chromosome	1773301	C→A	intergenic (‑98/‑45)	sll1892 ← / → slr1968	NC	ORF_ID:sll1892; unknown protein/ORF_ID:slr1968; unknown protein	YES	NO											0.101
chromosome	1780484	A→C	M1M (ATG→CTG) †	slr1970 →	SYN	ORF_ID:slr1970; unknown protein	YES	NO					0.077
chromosome	1780485	T→G	M1R (ATG→AGG) †	slr1970 →	NON	ORF_ID:slr1970; unknown protein	YES	YES					0.1																	0.106				0.097
chromosome	1793692	G→T	intergenic (‑84/‑160)	sll1882 ← / → slr1975	NC	ORF_ID:sll1882; hypothetical protein/renin‑binding protein	YES	YES									0.067															0.059
chromosome	1793727	T→A	intergenic (‑119/‑125)	sll1882 ← / → slr1975	NC	ORF_ID:sll1882; hypothetical protein/renin‑binding protein	NO	YES																								0.05
chromosome	1796780	A→C	S229R (AGT→AGG)	sll1879 ←	NON	ORF_ID:sll1879; unknown protein	YES	NO										0.086
chromosome	1796782	T→G	S229R (AGT→CGT)	sll1879 ←	NON	ORF_ID:sll1879; unknown protein	YES	NO									0.07
chromosome	1796792	A→C	P225P (CCT→CCG)	sll1879 ←	SYN	ORF_ID:sll1879; unknown protein	YES	YES							0.094							0.055								0.054
chromosome	1820010	C→A	intergenic (‑13/+228)	psbA3 ← / ← sll1866	NC	photosystem II D1 protein/ORF_ID:sll1866; hypothetical protein	NO	YES																					0.116	0.084					0.129
chromosome	1823447	T→G	intergenic (‑8/‑123)	trnR‑ACG ← / → petG	NC	trnR‑ACG/PetG subunit of the cytochrome b6f complex	YES	NO											0.072
chromosome	1832615	C→A	Q86K (CAA→AAA)	slr1474 →	NON	ORF_ID:slr1474; unknown protein	YES	NO													0.065
chromosome	1854763	G→T	R221L (CGG→CTG)	rpoC1 →	NON	RNA polymerase gamma‑subunit	NO	YES																		1
chromosome	1907639	C→A	E36* (GAA→TAA)	sll1433 ←	STOP	ORF_ID:sll1433; hypothetical protein	NO	YES																					0.071
chromosome	1919875	A→G	intergenic (‑59/+38)	rps12 ← / ← sll1095	NC	30S ribosomal protein S12/ORF_ID:sll1095; hypothetical protein	NO	YES																								1
chromosome	1920020	C→A	V177F (GTC→TTC)	sll1095 ←	NON	ORF_ID:sll1095; hypothetical protein	YES	NO											0.066
chromosome	1931782	T→G	L215R (CTG→CGG)	met3 →	NON	sulfate adenylyltransferase	NO	YES																								0.054
chromosome	1938467	A→C	Q13H (CAA→CAC)	slr1170 →	NON	ORF_ID:slr1170; unknown protein	NO	YES																	0.053
chromosome	1957652	A→T	intergenic (+166/‑106)	slr1677 → / → rpl21	NC	ORF_ID:slr1677; unknown protein/50S ribosomal protein L21	NO	YES																				0.051
chromosome	1957710	G→C	intergenic (+224/‑48)	slr1677 → / → rpl21	NC	ORF_ID:slr1677; unknown protein/50S ribosomal protein L21	NO	YES																							0.057
chromosome	1972406	A→C	I85L (ATC→CTC)	slr1683 →	NON	transposase	NO	YES																								0.112
chromosome	1972593	A→G	intergenic (+44/‑16)	slr1683 → / → slr1684	NC	transposase/transposase	NO	YES																	1		1
chromosome	1973978	A→C	L263R (CTA→CGA)	sll1559 ←	NON	soluble hydrogenase 42 kD subunit	YES	YES														0.082				0.061
chromosome	1974032	A→T	I245N (ATC→AAC)	sll1559 ←	NON	soluble hydrogenase 42 kD subunit	NO	YES																									0.07
chromosome	1999008	A→T	Q183H (CAA→CAT)	nadC →	NON	nicotinate‑nucleotide pyrophosphorylase	YES	YES				1	1	1		1	1	1				1		1				1	1	1	1	1	1	1	1
chromosome	2000350	G→A	G292S (GGT→AGT)	slr0937 →	NON	ORF_ID:slr0937; unknown protein	NO	YES																					1
chromosome	2010042	ISY523 (–) +3 bp	intergenic (‑38/‑174)	sll0914 ← / → slr0944	NC	ORF_ID:sll0914; unknown protein/ORF_ID:slr0944; hypothetical protein	NO	YES																									1
chromosome	2011414	T→A	intergenic (+45/‑107)	slr0944 → / → slr0945	NC	ORF_ID:slr0944; hypothetical protein/ORF_ID:slr0945; unknown protein	YES	NO							0.056
chromosome	2013327	A→C	T183P (ACC→CCC)	slr0947 →	NON	OmpR subfamily	NO	YES																					1	1	1
chromosome	2013361	A→G	D194G (GAC→GGC)	slr0947 →	NON	OmpR subfamily	NO	YES																									1	1	1
chromosome	2035618	T→G	L49V (TTA→GTA)	slr1624 →	NON	ORF_ID:slr1624; unknown protein	NO	YES																										0.071
chromosome	2037531	A→T	S333T (TCT→ACT)	bgl ←	NON	beta‑glucosidase	YES	NO					0.055
chromosome	2039568	C→A	L10I (CTC→ATC)	slr1627 →	NON	ORF_ID:slr1627; hypothetical protein	YES	NO													0.065
chromosome	2065848	G→T	intergenic (‑40/+153)	ssl2971 ← / ← prk	NC	ORF_ID:ssl2971; unknown protein/phosphoribulokinase	YES	YES								0.154	0.116												0.134
chromosome	2065853	C→A	intergenic (‑45/+148)	ssl2971 ← / ← prk	NC	ORF_ID:ssl2971; unknown protein/phosphoribulokinase	YES	YES								0.079										0.06						0.081
chromosome	2087759	A→C	intergenic (+26/+45)	slr0443 → / ← trnQ‑UUG	NC	ORF_ID:slr0443; unknown protein/trnQ‑UUG	YES	YES					0.084					0.066			0.079											0.073		0.066
chromosome	2096417	A→C	W42G (TGG→GGG)	sll0419 ←	NON	ORF_ID:sll0419; unknown protein	YES	NO													0.06
chromosome	2107485	T→G	L558W (TTG→TGG)	slr0280 →	NON	ORF_ID:slr0280; unknown protein	NO	YES																	0.063
chromosome	2128715	C→A	intergenic (+191/‑52)	slr0287 → / → glnN	NC	ORF_ID:slr0287; unknown protein/glutamate‑‑ammonia ligase	YES	NO										0.087			0.074
chromosome	2172175	G→T	D4186Y (GAT→TAT)	slr0408 →	NON	ORF_ID:slr0408; integrin alpha subunit domain homologue	YES	NO														0.052
chromosome	2180739	T→G	L55V (TTG→GTG)	petF →	NON	ferredoxin	YES	NO													0.059
chromosome	2185567	A→C	L73W (TTG→TGG)	sll0149 ←	NON	ORF_ID:sll0149; unknown protein	NO	YES																								0.057
chromosome	2200947	T→G	N5H (AAC→CAC)	sll0142 ←	NON	cation or drug efflux system protein	NO	YES																					0.057
chromosome	2200966	T→G	intergenic (‑7/+181)	sll0142 ← / ← sll0141	NC	cation or drug efflux system protein/ORF_ID:sll0141; hypothetical protein	NO	YES																								0.079	0.061		0.051
chromosome	2211058	C→A	intergenic (+130/‑225)	slr0166 → / → slr1923	NC	transposase/ORF_ID:slr1923; hypothetical protein	YES	NO													0.11
chromosome	2258878	T→G	S269A (TCG→GCG)	slr0990 →	NON	ORF_ID:slr0990; unknown protein	YES	NO						0.056
chromosome	2263848	T→G	L8V (TTA→GTA)	lipB →	NON	LipB protein	YES	YES											0.094											0.088
chromosome	2280652	A→C	F99C (TTT→TGT)	ribC ←	NON	riboflavin synthase alpha chain	YES	NO					0.054
chromosome	2284277	A→C	T162P (ACG→CCG)	xylR →	NON	xylose repressor	YES	YES									0.062														0.066
chromosome	2288418	C→A	G157G (GGC→GGA)	ndhD →	SYN	NADH dehydrogenase subunit 4	YES	YES								0.055												0.105						0.081
chromosome	2297447	T→A	E375V (GAA→GTA)	sll0294 ←	NON	ORF_ID:sll0294; unknown protein	NO	YES																		0.051
chromosome	2297457	C→A	A372S (GCC→TCC)	sll0294 ←	NON	ORF_ID:sll0294; unknown protein	YES	NO				0.076
chromosome	2347854	C→A	L686F (TTG→TTT)	sll0350 ←	NON	ORF_ID:sll0350; unknown protein	NO	YES																							0.087
chromosome	2350805	T→A	L145Q (CTG→CAG)	slr0363 →	NON	ORF_ID:slr0363; unknown protein	NO	YES																					0.102
chromosome	2353159	C→A	Q613K (CAA→AAA)	slr0364 →	NON	ORF_ID:slr0364; unknown protein	YES	NO									0.055
chromosome	2360056	A→C	N2912H (AAC→CAC)	slr0364 →	NON	ORF_ID:slr0364; unknown protein	YES	YES												0.054													0.062
chromosome	2364020	Δ1 bp	coding (3564/5229 nt)	slr0366 →	INDEL	ORF_ID:slr0366; unknown protein	NO	YES																					0.051
chromosome	2371584	A→T	L176H (CTC→CAC)	sphS ←	NON	regulation of the phosphate regulon	YES	YES				0.075		0.085								0.15	0.141		0.092	0.077							0.079	0.134
chromosome	2371603	T→G	R170R (AGG→CGG)	sphS ←	SYN	regulation of the phosphate regulon	YES	NO								0.13
chromosome	2371611	A→C	I167S (ATT→AGT)	sphS ←	NON	regulation of the phosphate regulon	YES	NO															0.065
chromosome	2401150	A→C	Q79H (CAA→CAC)	secD →	NON	protein‑export membrane protein; SecD	YES	YES				0.062																			0.065		0.094
chromosome	2404646	T→A	E108V (GAA→GTA)	rpl20 ←	NON	50S ribosomal protein L20	NO	YES																		0.051								0.057
chromosome	2404650	T→A	S107C (AGT→TGT)	rpl20 ←	NON	50S ribosomal protein L20	YES	NO															0.055
chromosome	2404654	A→C	A105A (GCT→GCG)	rpl20 ←	SYN	50S ribosomal protein L20	NO	YES																		0.073
chromosome	2430134	C→A	Q198K (CAA→AAA)	rfbW →	NON	mannosyl transferase	NO	YES																				0.079
chromosome	2453422	T→G	noncoding (254/1489 nt)	rrn16Sa ←	NC	16S ribosomal RNA	YES	NO															1
chromosome	2453429	T→C	noncoding (247/1489 nt)	rrn16Sa ←	NC	16S ribosomal RNA	YES	NO															1
chromosome	2453433	A→T	noncoding (243/1489 nt)	rrn16Sa ←	NC	16S ribosomal RNA	YES	NO															1
chromosome	2497884	T→G	P53P (CCT→CCG)	recG →	SYN	DNA recombinase	YES	YES												0.092						0.077
chromosome	2497887	T→G	G54G (GGT→GGG)	recG →	SYN	DNA recombinase	YES	NO				0.058
chromosome	2497890	T→G	S55R (AGT→AGG)	recG →	NON	DNA recombinase	YES	YES						0.063						0.068	0.07												0.056
chromosome	2498011	C→A	R96S (CGT→AGT)	recG →	NON	DNA recombinase	YES	NO															0.06
chromosome	2498022	G→T	L99F (TTG→TTT)	recG →	NON	DNA recombinase	YES	YES														0.058										0.067
chromosome	2502694	A→C	N395K (AAT→AAG)	ponA ←	NON	penicillin‑binding protein 1A	YES	NO													0.055
chromosome	2507062	G→T	C311F (TGT→TTT)	slr0214 →	NON	cytosine‑specific methyltransferase	YES	NO											0.06			0.09
chromosome	2510428	G→C	Q290E (CAA→GAA)	sll0209 ←	NON	ORF_ID:sll0209; hypothetical protein	NO	YES																1
chromosome	2547012	T→G	K6Q (AAG→CAG)	sll0410 ←	NON	ORF_ID:sll0410; unknown protein	YES	NO						0.076
chromosome	2550585	T→G	intergenic (+62/‑168)	accB → / → ccmK	NC	biotin carboxyl carrier protein of acetyl‑CoA carboxylase/carbon dioxide concentrating mechanism protein; CcmK	YES	NO													0.069
chromosome	2551155	A→T	S135C (AGC→TGC)	ccmK →	NON	carbon dioxide concentrating mechanism protein; CcmK	YES	NO													0.122
chromosome	2551174	T→G	L141R (CTA→CGA)	ccmK →	NON	carbon dioxide concentrating mechanism protein; CcmK	NO	YES																								0.093
chromosome	2551178	G→T	L142F (TTG→TTT)	ccmK →	NON	carbon dioxide concentrating mechanism protein; CcmK	YES	NO													0.067
chromosome	2594192	A→C	Q46H (CAA→CAC)	ribG →	NON	riboflavin biosynthesis protein	YES	YES							0.085					0.118		0.062				0.096				0.107	0.112		0.12
chromosome	2613833	T→G	G39G (GGT→GGG)	purN →	SYN	phosphoribosylglycinamide formyltransferase	YES	NO							0.054
chromosome	2636881	G→T	Q250K (CAA→AAA)	pstB ←	NON	phosphate transport ATP‑binding protein; PstB	YES	NO						0.08								0.066
chromosome	2657594	T→G	M1M (ATG→CTG) †	sll0611 ←	SYN	ORF_ID:sll0611; unknown protein	YES	YES									0.076		0.065							0.081			0.057	0.08
chromosome	2680983	A→T	I297N (ATC→AAC)	dgt ←	NON	dGTP triphosphohydrolase	YES	NO													0.063
chromosome	2682603	T→G	E208D (GAA→GAC)	sll0396 ←	NON	OmpR subfamily	NO	YES																					0.051
chromosome	2699474	T→G	A101A (GCT→GCG)	slr0420 →	SYN	ORF_ID:slr0420; unknown protein	YES	NO						0.071						0.096
chromosome	2713053	G→T	L85I (CTT→ATT)	sll0371 ←	NON	ORF_ID:sll0371; unknown protein	YES	NO											0.054	0.054
chromosome	2713071	G→T	P79T (CCA→ACA)	sll0371 ←	NON	ORF_ID:sll0371; unknown protein	NO	YES																									0.06
chromosome	2713099	C→A	L69F (TTG→TTT)	sll0371 ←	NON	ORF_ID:sll0371; unknown protein	YES	YES							0.078				0.067						0.067	0.075
chromosome	2714938	T→G	K584T (AAA→ACA)	carB ←	NON	carbamoyl‑phosphate synthase, pyrimidine‑specific, large chain	YES	YES				0.061									0.05			0.05									0.083
chromosome	2721706	A→C	F177V (TTC→GTC)	sll0188 ←	NON	ORF_ID:sll0188; unknown protein	YES	NO													0.059
chromosome	2733752	A→C	Q224H (CAA→CAC)	hdrB →	NON	heterodisulfide reductase subunit B	NO	YES																		0.065
chromosome	2744040	T→A	I249N (ATT→AAT)	slr0207 →	NON	ORF_ID:slr0207; unknown protein	YES	NO													0.054
chromosome	2747639	A→C	Q12H (CAA→CAC)	slr0210 →	NON	sensory transduction histidine kinase	YES	NO					0.062					0.088
chromosome	2776594	T→G	H276Q (CAT→CAG)	slr0904 →	NON	ORF_ID:slr0904; hypothetical protein	YES	NO												0.057
chromosome	2781745	G→T	D115Y (GAT→TAT)	slr0907 →	NON	ORF_ID:slr0907; unknown protein	NO	YES																			0.087
chromosome	2781751	C→A	Q117K (CAA→AAA)	slr0907 →	NON	ORF_ID:slr0907; unknown protein	YES	YES						0.062													0.134
chromosome	2868668	T→G	V251G (GTG→GGG)	slr0848 →	NON	ORF_ID:slr0848; hypothetical protein	NO	YES																				0.075					0.082
chromosome	2888839	G→T	R399L (CGG→CTG)	deaD →	NON	ATP‑dependent RNA helicase; DeaD	NO	YES																								1
chromosome	2909615	A→C	L63V (TTG→GTG)	sll0486 ←	NON	ORF_ID:sll0486; PCC7942 clock gene...ORFE	YES	NO														0.087	0.057
chromosome	2911607	A→C	F85V (TTT→GTT)	sll0484 ←	NON	ABC transporter	NO	YES																				0.073
chromosome	2927729	C→A	G658W (GGG→TGG)	sll0474 ←	NON	sensory transduction histidine kinase	NO	YES																			0.053
chromosome	2927765	T→A	K646* (AAG→TAG)	sll0474 ←	STOP	sensory transduction histidine kinase	YES	NO					0.066
chromosome	2942656	T→A	K76N (AAA→AAT)	sll0597 ←	NON	ORF_ID:sll0597; hypothetical protein	YES	NO													0.061
chromosome	2942661	C→A	E75* (GAA→TAA)	sll0597 ←	STOP	ORF_ID:sll0597; hypothetical protein	YES	NO						0.096
chromosome	2987931	T→G	N227H (AAC→CAC)	sll0096 ←	NON	ORF_ID:sll0096; unknown protein	NO	YES																							0.111
chromosome	2987934	G→T	Q226K (CAA→AAA)	sll0096 ←	NON	ORF_ID:sll0096; unknown protein	NO	YES																									0.104
chromosome	2987971	T→G	Q213H (CAA→CAC)	sll0096 ←	NON	ORF_ID:sll0096; unknown protein	NO	YES																			0.075
chromosome	2993968	T→G	I155S (ATT→AGT)	slr0112 →	NON	ORF_ID:slr0112; unknown protein	YES	YES				0.062									0.064		0.056										0.067
chromosome	3003503	A→C	T180P (ACG→CCG)	slr0121 →	NON	ORF_ID:slr0121; unknown protein	YES	YES								0.076																	0.056
chromosome	3003517	A→C	E184D (GAA→GAC)	slr0121 →	NON	ORF_ID:slr0121; unknown protein	YES	YES													0.086					0.06			0.062			0.069	0.074		0.121
chromosome	3037493	G→C	V62L (GTT→CTT)	slr0315 →	NON	ORF_ID:slr0315; hypothetical protein	NO	YES																	1		1
chromosome	3067121	G→T	A125S (GCC→TCC)	slr0800 →	NON	transposase	YES	NO									0.071
chromosome	3074098	G→T	A214E (GCA→GAA)	sll0782 ←	NON	putative protein kinase	YES	NO														0.054
chromosome	3101375	T→G	E64D (GAA→GAC)	sll0672 ←	NON	cation‑transporting ATPase; E1‑E2 ATPase	NO	YES																						0.062	0.064
chromosome	3143947	C→A	G79W (GGG→TGG)	sll0044 ←	NON	ORF_ID:sll0044; unknown protein	YES	NO						0.058
chromosome	3147633	T→G	Q263H (CAA→CAC)	sll0043 ←	NON	CheA like protein	YES	NO														0.068
chromosome	3151491	T→G	M163L (ATG→CTG)	sll0041 ←	NON	tsr or; CheD	YES	YES					0.052											0.05
chromosome	3154633	A→T	S10T (TCA→ACA)	sll0038 ←	NON	PatA subfamily	NO	YES																						0.094
chromosome	3162779	C→A	A489S (GCC→TCC)	sll0033 ←	NON	ORF_ID:sll0033; unknown protein	YES	NO													0.095
chromosome	3163025	T→G	I407L (ATC→CTC)	sll0033 ←	NON	ORF_ID:sll0033; unknown protein	NO	YES																									0.05
chromosome	3174137	C→A	T268N (ACC→AAC)	nrtC →	NON	nitrate transport protein; NrtC	YES	NO															0.058
chromosome	3181140	G→A	A133V (GCC→GTC)	sll0518 ←	NON	ORF_ID:sll0518; unknown protein	YES	YES				1	1	1	1	1	1	1	1	1	1	1	1	1	1	1	1	1	1	1	1	1	1	1	1
chromosome	3185900	A→T	I390F (ATT→TTT)	murE →	NON	UDP‑MurNac‑tripeptide synthetase	YES	NO													0.091
chromosome	3185906	A→T	I392L (ATA→TTA)	murE →	NON	UDP‑MurNac‑tripeptide synthetase	NO	YES																										0.056
chromosome	3195783	T→G	G595G (GGT→GGG)	slt →	SYN	soluble lytic transglycosylase	NO	YES																			0.064
chromosome	3199322	A→C	I198L (ATC→CTC)	hemE →	NON	uroporphyrinogen decarboxylase	YES	YES												0.064							0.051
chromosome	3204849	A→C	V268G (GTT→GGT)	sll0505 ←	NON	ORF_ID:sll0505; hypothetical protein	NO	YES																									0.05
chromosome	3238625	G→T	Q82K (CAA→AAA)	sll0896 ←	NON	Holliday juction resolvase; RuvC	NO	YES																							0.084
chromosome	3240255	A→C	E25D (GAA→GAC)	trpC →	NON	indole‑3‑glycerol phosphate synthase	YES	NO							0.055
chromosome	3259369	A→C	V173V (GTT→GTG)	sll0529 ←	SYN	ORF_ID:sll0529; unknown protein	NO	YES																							0.063
chromosome	3271508	A→C	Q353P (CAG→CCG)	pyrD →	NON	dihydroorotate dehydrogenase	NO	YES																		0.146						0.103
chromosome	3283284	T→G	E41D (GAA→GAC)	sll1340 ←	NON	ORF_ID:sll1340; unknown protein	YES	YES													0.054		0.063	0.052
chromosome	3286904	C→G	E89Q (GAA→CAA)	sll1336 ←	NON	ORF_ID:sll1336; hypothetical protein	YES	YES				0.087		0.084						0.061	0.117		0.101			0.096		0.1				0.051
chromosome	3298825	C→A	P167Q (CCA→CAA)	sbpA →	NON	sulfate binding protein; SbpA	NO	YES																	0.06
chromosome	3306427	G→T	P783T (CCA→ACA)	sll1366 ←	NON	helicase of the snf2/rad54 family	NO	YES																											0.055
chromosome	3306444	G→T	T777N (ACC→AAC)	sll1366 ←	NON	helicase of the snf2/rad54 family	NO	YES																				0.062
chromosome	3306453	G→T	T774N (ACC→AAC)	sll1366 ←	NON	helicase of the snf2/rad54 family	YES	YES								0.07																0.075
chromosome	3319419	T→G	L47V (TTG→GTG)	hisA →	NON	phosphorybosilformimino‑5‑amino‑phosphorybosil‑ 4‑imidazolecarboxamideisomerase	NO	YES																				0.087
chromosome	3323561	G→T	R96L (CGT→CTT)	rpoDI →	NON	RNA polymerase sigma factor	YES	YES				1	1	1	1	1	1	1	1	1	1	1	1	1	1	1	1	1	1	1	1	1	1	1	1
chromosome	3342594	T→G	intergenic (‑152/‑263)	sll0624 ← / → speA	NC	ORF_ID:sll0624; unknown protein/arginine decarboxylase	NO	YES																							0.068
chromosome	3353444	G→T	L83F (TTG→TTT)	slr0668 →	NON	ORF_ID:slr0668; unknown protein	NO	YES																							0.054
chromosome	3355884	C→A	L993F (TTG→TTT)	gltB ←	NON	ferredoxin‑dependent glutamate synthase	YES	YES													0.054				0.068									0.077
chromosome	3362629	Δ8 bp	coding (573‑580/1110 nt)	slr1557 →	INDEL	ORF_ID:slr1557; unknown protein	NO	YES																		1
chromosome	3380463	A→C	M112L (ATG→CTG)	slr1570 →	NON	ORF_ID:slr1570; unknown protein	YES	NO				0.066								0.076
chromosome	3395730	T→G	intergenic (‑12/+33)	devB ← / ← sll1477	NC	glucose‑6‑P‑dehydrogenase/ORF_ID:sll1477; unknown protein	YES	YES					0.054						0.084		0.089	0.058					0.068			0.079	0.091	0.121		0.062	0.058
chromosome	3415169	G→T	E113* (GAA→TAA)	slr0748 →	STOP	ORF_ID:slr0748; unknown protein	YES	NO												0.055
chromosome	3421017	G→C	R201P (CGA→CCA)	eno →	NON	enolase	YES	NO											0.051
chromosome	3423662	G→T	E211* (GAG→TAG)	p →	STOP	P protein	NO	YES																		0.051
chromosome	3440941	G→T	L302I (CTT→ATT)	sll0723 ←	NON	ORF_ID:sll0723; unknown protein	YES	NO													0.05
chromosome	3441553	C→A	D98Y (GAT→TAT)	sll0723 ←	NON	ORF_ID:sll0723; unknown protein	NO	YES																									0.058
chromosome	3442539	A→C	intergenic (‑695/+122)	sll0723 ← / ← sll0722	NC	ORF_ID:sll0723; unknown protein/ORF_ID:sll0722; unknown protein	NO	YES																							0.112
chromosome	3450391	G→T	G155V (GGA→GTA)	hlyB →	NON	haemolysin secretion ATP‑binding protein	NO	YES																		0.065					0.053
chromosome	3491003	G→T	L167I (CTA→ATA)	sll0445 ←	NON	ORF_ID:sll0445; unknown protein	NO	YES																										0.051
chromosome	3491031	A→C	A157A (GCT→GCG)	sll0445 ←	SYN	ORF_ID:sll0445; unknown protein	YES	YES													0.094										0.089		0.081
chromosome	3521007	T→G	T230P (ACG→CCG)	prfA ←	NON	peptide chain release factor	YES	NO												0.054
chromosome	3534417	C→G	L192V (CTG→GTG)	argG →	NON	argininosuccinate synthetase	NO	YES																0.311
chromosome	3534864	G→A	V341M (GTG→ATG)	argG →	NON	argininosuccinate synthetase	NO	YES																0.11
chromosome	3558729	A→C	S417R (AGC→CGC)	slr0599 →	NON	eukaryotic protein kinase	NO	YES																										0.061
chromosome	3565442	A→T	D202V (GAC→GTC)	lepA →	NON	LepA gene product	NO	YES																								0.052
chromosome	3569535	T→G	intergenic (+12/‑92)	slr0607 → / → hisI	NC	ORF_ID:slr0607; unknown protein/phosphoribosyl‑ATP pyrophosphohydrolase:phosphoribosyl‑AMP cyclohydrolase	YES	YES					0.068	0.053											0.061
chromosome	442,222:1	+T	coding (59/1770 nt)	ycf45 →	INDEL	ORF_ID:slr0692; hypothetical protein	NO	YES																1

## Sheet: coding region
genomic entity	position	mutation	annotation	locus	mut type	function	in FL0	in FL+	WT	LT_initial	LT_final	FL0_1	FL0_2	FL0_3	FL0_4	FL0_5	FL0_6	FL0_7	FL0_8	FL0_9	FL0_10	FL0_11	FL0_12	FL+_13	FL+_14	FL+_15	FL+_16	FL+_17	FL+_18	FL+_19	FL+_20	FL+_21	FL+_22	FL+_23	FL+_24
pSYSG	4849	C→A	D400Y (GAT→TAT)	sll8006 ←	NON	type I restriction‑modification system S subunit	YES	NO													0.051
pSYSG	11474	G→T	K159N (AAG→AAT)	slr8016 →	NON	plasmid partitioning protein	YES	NO					0.118
pSYSA	14283	A→T	Y21F (TAC→TTC)	slr7015 →	NON	ORF_ID:slr7015; hypothetical protein	NO	YES																											0.058
pSYSA	14360	G→T	E47* (GAA→TAA)	slr7015 →	STOP	ORF_ID:slr7015; hypothetical protein	YES	NO														0.058
pSYSA	17222	Δ935 bp	Δ935 bp	ssr7018–[ssl7019]	INDEL	ssr7018, [ssl7019]	YES	YES							1	1		1				1		1										1
pSYSM	18456	G→T	G193* (GGA→TGA)	slr5012 →	STOP	ORF_ID:slr5012; hypothetical protein	NO	YES																								0.05
pSYSG	20504	G→T	G189G (GGG→GGT)	slr8023 →	SYN	ORF_ID:slr8023; probable esterase	NO	YES																0.085
pSYSA	21171	G→T	V302V (GTG→GTT)	slr7023 →	SYN	ORF_ID:slr7023; hypothetical protein	YES	NO						0.055
pSYSA	21195	A→G	V310V (GTA→GTG)	slr7023 →	SYN	ORF_ID:slr7023; hypothetical protein	YES	NO						0.119
pSYSA	21198	G→T	E311D (GAG→GAT)	slr7023 →	NON	ORF_ID:slr7023; hypothetical protein	YES	NO						0.143
pSYSA	21260	C→T	P332L (CCA→CTA)	slr7023 →	NON	ORF_ID:slr7023; hypothetical protein	YES	NO						0.237
pSYSA	21261	A→G	P332P (CCA→CCG)	slr7023 →	SYN	ORF_ID:slr7023; hypothetical protein	YES	NO						0.251
pSYSA	21273	G→A	V336V (GTG→GTA)	slr7023 →	SYN	ORF_ID:slr7023; hypothetical protein	YES	NO						0.198
pSYSA	21276	T→G	D337E (GAT→GAG)	slr7023 →	NON	ORF_ID:slr7023; hypothetical protein	YES	NO						0.208
pSYSA	21809	C→T	S515L (TCG→TTG)	slr7023 →	NON	ORF_ID:slr7023; hypothetical protein	NO	YES																		0.059				0.06
pSYSA	21815	C→T	P517L (CCG→CTG)	slr7023 →	NON	ORF_ID:slr7023; hypothetical protein	NO	YES																		0.067				0.061
chromosome	24168	C→A	G326V (GGT→GTT)	sll1202 ←	NON	ORF_ID:sll1202; unknown protein	NO	YES																									0.06
pSYSG	25218	G→A	R24R (CGG→CGA)	slr8030 →	SYN	ORF_ID:slr8030; hypothetical protein	YES	NO												0.059
pSYSG	27416	C→A	T199T (ACG→ACT)	ndhK2 ←	SYN	NADH dehydrogenase subunit	YES	NO												0.08
pSYSG	36173	A→C	K1159T (AAG→ACG)	slr8038 →	NON	WD‑repeat protein	NO	YES																		0.103
pSYSA	37628	T→G	S171R (AGT→CGT)	sll7043 ←	NON	unknown protein	NO	YES																						0.08
pSYSM	39206	G→C	G71G (GGG→GGC)	slr5040 →	SYN	transposase	NO	YES																								1
chromosome	44341	G→T	A257A (GCG→GCT)	fecB →	SYN	iron(III) dicitrate‑binding periplasmic protein	NO	YES																								0.08
pSYSM	44691	G→T	R389S (CGC→AGC)	sll5047 ←	NON	unknown protein	YES	NO														0.063
pSYSA	49334	A→G	N182S (AAC→AGC)	slr7059 →	NON	ORF_ID:slr7059; hypothetical protein	NO	YES																								0.721
pSYSM	56860	A→C	A316A (GCT→GCG)	sll5057 ←	SYN	ORF_ID:sll5057; probable glycosyltransferase	NO	YES																		0.051
pSYSM	56871	G→T	R313S (CGT→AGT)	sll5057 ←	NON	ORF_ID:sll5057; probable glycosyltransferase	YES	YES											0.062													0.069
pSYSM	62712	T→G	K707T (AAA→ACA)	sll5060 ←	NON	two‑component hybrid sensor and regulator	YES	YES				0.053						0.06													0.051	0.06
pSYSM	67884	T→A	K31N (AAA→AAT)	sll5066 ←	NON	ORF_ID:sll5066; probable plasmid partitioning protein, ParA family	NO	YES																						0.061
chromosome	77107	A→C	Y101D (TAT→GAT)	dapB ←	NON	dihydrodipicolinate reductase	YES	NO											0.053
chromosome	81579	C→A	G214G (GGC→GGA)	slr1122 →	SYN	ORF_ID:slr1122; unknown protein	NO	YES																				0.068
chromosome	81633	C→A	V232V (GTC→GTA)	slr1122 →	SYN	ORF_ID:slr1122; unknown protein	YES	NO						0.06
chromosome	83741	T→G	K38T (AAA→ACA)	sll1053 ←	NON	ORF_ID:sll1053; hypothetical protein	YES	YES				0.071							0.079	0.092						0.057	0.06		0.065		0.061		0.057
chromosome	86293	A→C	L45L (CTA→CTC)	crtX →	SYN	zeaxanthin glucosyl transferase	YES	YES					0.05	0.063																		0.071	0.061	0.074
pSYSX	90184	T→G	F68C (TTT→TGT)	slr6096 →	NON	ORF_ID:slr6096; type I restriction‑modification system, M subunit (fragment)	YES	NO						0.059
pSYSX	92679	G→T	S222Y (TCC→TAC)	sll6098 ←	NON	ORF_ID:sll6098; hypothetical protein	YES	YES						0.064																		0.053
pSYSX	92723	C→A	L207F (TTG→TTT)	sll6098 ←	NON	ORF_ID:sll6098; hypothetical protein	YES	YES				0.064	0.103	0.067		0.056										0.065
pSYSX	92730	G→T	T205N (ACT→AAT)	sll6098 ←	NON	ORF_ID:sll6098; hypothetical protein	YES	NO														0.051
pSYSX	92740	A→C	L202V (TTG→GTG)	sll6098 ←	NON	ORF_ID:sll6098; hypothetical protein	YES	NO					0.081
pSYSA	95242	G→T	L175F (TTG→TTT)	slr7097 →	NON	ORF_ID:slr7097; hypothetical protein	NO	YES																								0.056
pSYSM	96439	G→T	E106* (GAA→TAA)	slr5101 →	STOP	ORF_ID:slr5101; hypothetical protein	YES	YES															0.075								0.053
pSYSM	96448	T→A	Y109N (TAC→AAC)	slr5101 →	NON	ORF_ID:slr5101; hypothetical protein	YES	YES														0.056										0.059
pSYSM	96458	G→T	G112V (GGA→GTA)	slr5101 →	NON	ORF_ID:slr5101; hypothetical protein	YES	NO							0.068
pSYSM	106152	T→G	N74H (AAC→CAC)	ssl5114 ←	NON	unknown protein	YES	YES						0.064			0.106												0.082
pSYSM	106798	C→A	L88I (CTA→ATA)	slr5115 →	NON	ORF_ID:slr5115; hypothetical protein	NO	YES																								0.065
chromosome	124629	G→C	F605L (TTC→TTG)	dfr ←	NON	drug sensory protein A	NO	YES																		1
chromosome	125267	T→C	T393A (ACC→GCC)	dfr ←	NON	drug sensory protein A	NO	YES																	1		1
chromosome	134961	A→C	K175N (AAA→AAC)	infB →	NON	initiation factor IF‑2	YES	NO											0.061
chromosome	156743	A→T	*91K (TAA→AAA)	ssl0410 ←	NON	ORF_ID:ssl0410; unknown protein	YES	YES												0.089							0.057
chromosome	190150	T→G	L40V (TTG→GTG)	slr1094 →	NON	ORF_ID:slr1094; unknown protein	YES	NO													0.163
chromosome	190153	A→T	S41C (AGT→TGT)	slr1094 →	NON	ORF_ID:slr1094; unknown protein	YES	YES				0.125															0.126
chromosome	190160	A→T	E43V (GAG→GTG)	slr1094 →	NON	ORF_ID:slr1094; unknown protein	NO	YES																			0.065
chromosome	217642	A→C	V229G (GTT→GGT)	ccmM ←	NON	carbon dioxide concentrating mechanism protein; CcmM	YES	NO											0.054
chromosome	246673	A→C	F116C (TTT→TGT)	malQ ←	NON	4‑alpha‑glucanotransferase	NO	YES																								0.057
chromosome	277327	G→T	W300L (TGG→TTG)	slr1799 →	NON	ORF_ID:slr1799; unknown protein	NO	YES																				0.056
chromosome	278254	T→G	L609R (CTT→CGT)	slr1799 →	NON	ORF_ID:slr1799; unknown protein	NO	YES																											0.112
chromosome	297208	G→T	L711F (TTG→TTT)	slr1298 →	NON	ORF_ID:slr1298; hypothetical protein	NO	YES																				0.064
chromosome	297223	G→T	L716F (TTG→TTT)	slr1298 →	NON	ORF_ID:slr1298; hypothetical protein	NO	YES																			0.056	0.088
chromosome	305454	T→G	L506V (TTG→GTG)	slr1301 →	NON	ORF_ID:slr1301; unknown protein	NO	YES																									0.092
chromosome	305471	G→T	L511F (TTG→TTT)	slr1301 →	NON	ORF_ID:slr1301; unknown protein	YES	NO											0.057
chromosome	312637	T→G	L127R (CTA→CGA)	slr1306 →	NON	ORF_ID:slr1306; unknown protein	NO	YES																					0.052
chromosome	321719	T→G	A7A (GCT→GCG)	sir →	SYN	ferredoxin‑sulfite reductase	YES	NO								0.05
chromosome	321738	A→C	K14Q (AAG→CAG)	sir →	NON	ferredoxin‑sulfite reductase	NO	YES																							0.057
chromosome	321742	T→G	V15G (GTA→GGA)	sir →	NON	ferredoxin‑sulfite reductase	YES	NO									0.065
chromosome	331716	A→C	Q191H (CAA→CAC)	cbiH →	NON	precorrin methylase	YES	NO												0.086
chromosome	335959	T→C	S113G (AGC→GGC)	sll0933 ←	NON	ORF_ID:sll0933; unknown protein	YES	YES				1	1	1	1	1	1	1	1	1	1	1	1	1	1	1	1	1	1	1	1	1	1	1	1
chromosome	347692	T→A	R39W (AGG→TGG)	epsB ←	NON	exopolysaccharide export protein	NO	YES																				0.081
chromosome	347699	A→C	G36G (GGT→GGG)	epsB ←	SYN	exopolysaccharide export protein	YES	NO														0.05
chromosome	347715	A→C	L31R (CTT→CGT)	epsB ←	NON	exopolysaccharide export protein	YES	YES							0.091												0.09
chromosome	365954	G→T	S80I (AGT→ATT)	slr1063 →	NON	ORF_ID:slr1063; hypothetical protein	YES	NO				0.126
chromosome	379321	C→T	A86V (GCC→GTC)	slr1075 →	NON	transposase	NO	YES																									0.061
chromosome	389818	T→G	Q179P (CAG→CCG)	sll1025 ←	NON	ORF_ID:sll1025; unknown protein	YES	NO					0.1
chromosome	389827	T→G	N176T (AAC→ACC)	sll1025 ←	NON	ORF_ID:sll1025; unknown protein	YES	YES													0.108											0.07
chromosome	418522	C→A	A441E (GCA→GAA)	fmu_fmv →	NON	Fmu and Fmv protein	NO	YES																				0.119	0.062						0.072
chromosome	442494	Δ13 bp	coding (331‑343/1770 nt)	ycf45 →	INDEL	ORF_ID:slr0692; hypothetical protein	NO	YES																				1
chromosome	443761	A→G	E533G (GAA→GGA)	ycf45 →	NON	ORF_ID:slr0692; hypothetical protein	NO	YES																					1
chromosome	470037	A→C	N149T (AAC→ACC)	slr1603 →	NON	ORF_ID:slr1603; hypothetical protein	NO	YES																		0.08					0.103
chromosome	489322	T→A	L679H (CTC→CAC)	slr1609 →	NON	long‑chain‑fatty‑acid CoA ligase	NO	YES																							0.074
chromosome	489325	A→C	K680T (AAA→ACA)	slr1609 →	NON	long‑chain‑fatty‑acid CoA ligase	NO	YES																									0.076
chromosome	501564	C→G	E143Q (GAA→CAA)	sll1011 ←	NON	ORF_ID:sll1011; hypothetical protein	YES	YES								0.12																		0.147
chromosome	501571	A→T	H140Q (CAT→CAA)	sll1011 ←	NON	ORF_ID:sll1011; hypothetical protein	YES	YES					0.06			0.05		0.068	0.079						0.056		0.059						0.054
chromosome	501596	T→G	N132T (AAC→ACC)	sll1011 ←	NON	ORF_ID:sll1011; hypothetical protein	YES	NO						0.052						0.06	0.098	0.07	0.079
chromosome	501602	T→G	N130T (AAC→ACC)	sll1011 ←	NON	ORF_ID:sll1011; hypothetical protein	YES	NO													0.065
chromosome	501607	C→G	Q128H (CAG→CAC)	sll1011 ←	NON	ORF_ID:sll1011; hypothetical protein	YES	YES													0.122							0.062
chromosome	527495	Δ24 bp	coding (3150‑3173/5250 nt)	slr1753 →	INDEL	ORF_ID:slr1753; unknown protein	YES	NO															0.097
chromosome	527495	Δ42 bp	coding (3150‑3191/5250 nt)	slr1753 →	INDEL	ORF_ID:slr1753; unknown protein	YES	NO				0.057
chromosome	527588	T→G	P1081P (CCT→CCG)	slr1753 →	SYN	ORF_ID:slr1753; unknown protein	YES	NO														0.139
chromosome	527672	T→C	P1109P (CCT→CCC)	slr1753 →	SYN	ORF_ID:slr1753; unknown protein	YES	NO					0.07
chromosome	527837	A→T	E1164D (GAA→GAT)	slr1753 →	NON	ORF_ID:slr1753; unknown protein	NO	YES																	0.188
chromosome	530947	A→T	W97R (TGG→AGG)	sll1647 ←	NON	ORF_ID:sll1647; hypothetical protein	NO	YES																	1		1
chromosome	555586	T→G	L109V (TTG→GTG)	slr1847 →	NON	ORF_ID:slr1847; hypothetical protein	NO	YES																	0.109
chromosome	576469	A→C	P145P (CCT→CCG)	sll1942 ←	SYN	ORF_ID:sll1942; unknown protein	NO	YES																										0.082
chromosome	577060	A→T	N903K (AAT→AAA)	gyrA ←	NON	DNA gyrase A subunit	NO	YES																											0.074
chromosome	589750	T→C	A841A (GCT→GCC)	slr2046 →	SYN	Fat protein	NO	YES																					1	1	1
chromosome	614842	T→G	M1R (ATG→AGG) †	slr1911 →	NON	ORF_ID:slr1911; unknown protein	YES	NO													0.057
chromosome	614860	T→G	I7R (ATA→AGA)	slr1911 →	NON	ORF_ID:slr1911; unknown protein	YES	YES													0.07						0.087
chromosome	630595	T→G	K333T (AAG→ACG)	sll0998 ←	NON	LysR transcriptional regulator	NO	YES																											0.086
chromosome	630606	T→G	Q329H (CAA→CAC)	sll0998 ←	NON	LysR transcriptional regulator	YES	YES										0.09										0.098
chromosome	630619	T→G	N325T (AAC→ACC)	sll0998 ←	NON	LysR transcriptional regulator	NO	YES																		0.054
chromosome	664693	A→C	L30V (TTG→GTG)	sll0986 ←	NON	transposase	YES	YES						0.054																0.062
chromosome	693714	C→T	V500M (GTG→ATG)	rnb ←	NON	ribonuclease II	NO	YES																				1
chromosome	700275	T→G	F436V (TTC→GTC)	feoB →	NON	ferrous iron transport protein B	YES	NO													0.057
chromosome	715293	T→G	E287D (GAA→GAC)	lig ←	NON	DNA ligase	NO	YES																									0.066
chromosome	727349	A→G	S40P (TCT→CCT)	cpcB ←	NON	phycocyanin b subunit	NO	YES																						1	1
chromosome	735170	A→C	P62P (CCA→CCC)	slr1708 →	SYN	lysostaphin	NO	YES																		0.079							0.052
chromosome	784869	T→A	V34D (GTC→GAC)	slr1134 →	NON	ORF_ID:slr1134; hypothetical protein	YES	YES													0.067												0.071		0.082
chromosome	815288	G→T	S497I (AGT→ATT)	slr1149 →	NON	ABC transporter	YES	NO									0.065
chromosome	828820	C→T	D82N (GAT→AAT)	rpl17 ←	NON	50S ribosomal protein L17	YES	NO															0.052
chromosome	831484	C→A	L25F (TTG→TTT)	infA ←	NON	initiation factor IF‑1	NO	YES																										0.126
chromosome	831493	G→T	F22L (TTC→TTA)	infA ←	NON	initiation factor IF‑1	YES	NO				0.075
chromosome	858495	G→T	T791N (ACC→AAC)	rpoB ←	NON	RNA polymerase beta subunit	NO	YES																									1	1	1
chromosome	865764	A→C	I205S (ATT→AGT)	sll1124 ←	NON	sensory transduction histidine kinase	YES	YES										0.085													0.063			0.063
chromosome	865785	A→C	L198R (CTG→CGG)	sll1124 ←	NON	sensory transduction histidine kinase	YES	YES										0.072											0.058
chromosome	871563	A→C	L570V (TTG→GTG)	sll1120 ←	NON	chromosome segregation protein SMC1	YES	YES														0.154				0.137					0.166		0.109
chromosome	902704	T→A	T106T (ACT→ACA)	slr1215 →	SYN	ORF_ID:slr1215; unknown protein	NO	YES																									0.052
chromosome	923835	C→A	G2V (GGA→GTA)	rpl10 ←	SYN	50S ribosomal protein L10	NO	YES																							0.055
chromosome	969966	G→T	T285T (ACC→ACA)	hisC ←	SYN	histidinol‑phosphate aminotransferase	YES	NO							0.081
chromosome	989034	T→G	T158P (ACG→CCG)	sll1464 ←	NON	ORF_ID:sll1464; hypothetical protein	YES	YES														0.079				0.076
chromosome	989035	T→G	E157D (GAA→GAC)	sll1464 ←	NON	ORF_ID:sll1464; hypothetical protein	YES	YES												0.056						0.077
chromosome	996540	A→C	E422D (GAA→GAC)	lysS →	NON	lysyl‑tRNA synthetase	YES	YES														0.091								0.093
chromosome	1007846	T→G	K134T (AAA→ACA)	nrtC ←	NON	nitrate transport protein; NrtC	NO	YES																			0.119
chromosome	1007860	T→G	Q129H (CAA→CAC)	nrtC ←	NON	nitrate transport protein; NrtC	YES	YES						0.098																	0.116
chromosome	1030834	T→G	L214V (TTG→GTG)	purC →	NON	phosphoribosyl aminoidazole succinocarboxamide synthetase	YES	YES												0.102	0.071												0.102
chromosome	1030851	G→C	Q219H (CAG→CAC)	purC →	NON	phosphoribosyl aminoidazole succinocarboxamide synthetase	NO	YES																						0.063
chromosome	1059576	A→C	N347T (AAT→ACT)	pmbA →	NON	PmbA protein	YES	NO							0.051
chromosome	1065939	T→G	K1024N (AAA→AAC)	dnaX ←	NON	DNA polymerase III subunit	YES	NO												0.059
chromosome	1066022	T→G	R997R (AGG→CGG)	dnaX ←	SYN	DNA polymerase III subunit	YES	NO				0.063						0.067	0.05		0.079	0.05
chromosome	1066233	T→G	E926D (GAA→GAC)	dnaX ←	NON	DNA polymerase III subunit	YES	NO										0.08
chromosome	1123506	G→T	Q176K (CAA→AAA)	sll1267 ←	NON	ORF_ID:sll1267; unknown protein	YES	NO					0.069
chromosome	1137531	T→G	F53V (TTT→GTT)	slr0878 →	NON	ORF_ID:slr0878; hypothetical protein	YES	NO													0.057
chromosome	1137538	C→G	S55C (TCC→TGC)	slr0878 →	NON	ORF_ID:slr0878; hypothetical protein	NO	YES																									0.061
chromosome	1144864	A→C	K46T (AAG→ACG)	psr →	NON	regulation of penicillin binding protein 5 production	NO	YES																		0.059
chromosome	1172808	A→C	E746D (GAA→GAC)	slr1403 →	NON	ORF_ID:slr1403; integrin alpha‑ and beta4‑ subunit domain homologue	YES	NO												0.054
chromosome	1178173	C→G	R2535G (CGT→GGT)	slr1403 →	NON	ORF_ID:slr1403; integrin alpha‑ and beta4‑ subunit domain homologue	YES	NO				0.054
chromosome	1178245	A→C	N2559H (AAC→CAC)	slr1403 →	NON	ORF_ID:slr1403; integrin alpha‑ and beta4‑ subunit domain homologue	NO	YES																				0.052
chromosome	1178289	T→G	V2573V (GTT→GTG)	slr1403 →	SYN	ORF_ID:slr1403; integrin alpha‑ and beta4‑ subunit domain homologue	YES	YES							0.05	0.054					0.053					0.051				0.061
chromosome	1178304	T→G	A2578A (GCT→GCG)	slr1403 →	SYN	ORF_ID:slr1403; integrin alpha‑ and beta4‑ subunit domain homologue	YES	YES									0.082									0.101				0.113
chromosome	1178322	T→G	T2584T (ACT→ACG)	slr1403 →	SYN	ORF_ID:slr1403; integrin alpha‑ and beta4‑ subunit domain homologue	NO	YES																		0.082				0.085				0.058
chromosome	1178329	A→C	T2587P (ACT→CCT)	slr1403 →	NON	ORF_ID:slr1403; integrin alpha‑ and beta4‑ subunit domain homologue	YES	NO										0.055
chromosome	1275418	A→T	M247K (ATG→AAG)	sll1710 ←	NON	transposase	NO	YES																									0.07
chromosome	1275437	G→T	P241T (CCT→ACT)	sll1710 ←	NON	transposase	NO	YES																									0.075
chromosome	1287745	T→G	N340T (AAC→ACC)	sll1699 ←	NON	extracellular solute‑binding protein	NO	YES																									0.058
chromosome	1288841	T→G	N91T (AAT→ACT)	sll1698 ←	NON	ORF_ID:sll1698; unknown protein	NO	YES																		0.055
chromosome	1336429	C→A	P287T (CCT→ACT)	slr1747 →	NON	ORF_ID:slr1747; hypothetical protein	NO	YES																				0.065	0.105				0.073
chromosome	1364962	G→T	P168T (CCC→ACC)	sll0837 ←	NON	ORF_ID:sll0837; unknown protein	YES	NO									0.069
chromosome	1364993	C→A	L157F (TTG→TTT)	sll0837 ←	NON	ORF_ID:sll0837; unknown protein	YES	NO								0.062
chromosome	1364997	T→A	D156V (GAT→GTT)	sll0837 ←	NON	ORF_ID:sll0837; unknown protein	NO	YES																	0.114
chromosome	1371729	T→G	W188G (TGG→GGG)	slr0872 →	NON	ORF_ID:slr0872; unknown protein	YES	NO				0.06			0.051
chromosome	1375727	G→T	G126V (GGA→GTA)	slr1243 →	NON	ORF_ID:slr1243; unknown protein	NO	YES																										0.067
chromosome	1375780	G→T	D144Y (GAT→TAT)	slr1243 →	NON	ORF_ID:slr1243; unknown protein	NO	YES																										0.068
chromosome	1375786	G→T	D146Y (GAT→TAT)	slr1243 →	NON	ORF_ID:slr1243; unknown protein	YES	NO											0.053
chromosome	1381040	A→T	I284N (ATC→AAC)	sll1161 ←	NON	adenylate cyclase	YES	NO														0.061
chromosome	1381056	T→G	R279R (AGG→CGG)	sll1161 ←	SYN	adenylate cyclase	NO	YES																		0.066
chromosome	1384680	G→T	D285Y (GAT→TAT)	slr1245 →	NON	transcriptional regulator	NO	YES																								0.059
chromosome	1393381	A→T	E137V (GAA→GTA)	cyp →	NON	peptidyl‑prolyl cis‑trans isomerase	YES	NO														0.068
chromosome	1405598	A→C	S55R (AGC→CGC)	slr1261 →	NON	ORF_ID:slr1261; hypothetical protein	NO	YES																											0.069
chromosome	1409502	G→T	Q50K (CAA→AAA)	sll1961 ←	NON	ORF_ID:sll1961; unknown protein	YES	NO											0.062
chromosome	1414572	A→T	E149D (GAA→GAT)	topA →	NON	DNA topoisomerase I	NO	YES																	1		1
chromosome	1415589	T→G	A488A (GCT→GCG)	topA →	SYN	DNA topoisomerase I	YES	NO													0.058
chromosome	1415635	A→G	T504A (ACC→GCC)	topA →	NON	DNA topoisomerase I	NO	YES																					1	1	1
chromosome	1417306	A→C	Q8P (CAA→CCA)	slr2060 →	NON	ORF_ID:slr2060; unknown protein	YES	YES														0.069									0.058
chromosome	1417320	T→G	F13V (TTT→GTT)	slr2060 →	NON	ORF_ID:slr2060; unknown protein	NO	YES																									0.079
chromosome	1417347	T→G	L22V (TTA→GTA)	slr2060 →	NON	ORF_ID:slr2060; unknown protein	YES	YES														0.06				0.078							0.053
chromosome	1417388	T→G	R35R (CGT→CGG)	slr2060 →	SYN	ORF_ID:slr2060; unknown protein	YES	NO										0.063
chromosome	1421538	T→A	I200N (ATC→AAC)	slr2062 →	NON	transposase	NO	YES																								0.06
chromosome	1427050	A→C	L201R (CTA→CGA)	sll1951 ←	NON	hemolysin	NO	YES																						0.064
chromosome	1438340	C→A	T323N (ACC→AAC)	thl →	NON	acetyl coenzyme A acetyltransferase (thiolase)	YES	NO														0.071
chromosome	1449671	A→C	T538P (ACG→CCG)	slr2002 →	NON	ORF_ID:slr2002; unknown protein	YES	YES				0.057												0.063							0.057
chromosome	1451658	T→G	E287D (GAA→GAC)	sll1902 ←	NON	ORF_ID:sll1902; hypothetical protein	NO	YES																								0.089
chromosome	1482024	T→A	S47C (AGT→TGT)	mntA ←	NON	Mn transporter; MntA	NO	YES																									0.075
chromosome	1489195	A→C	Y118S (TAT→TCT)	slr1727 →	NON	eukaryotic Na+/H+ exchanger	YES	NO												0.069	0.065
chromosome	1489197	T→G	W119G (TGG→GGG)	slr1727 →	NON	eukaryotic Na+/H+ exchanger	NO	YES																						0.059
chromosome	1510868	T→A	A293A (GCT→GCA)	ndhH →	SYN	NADH dehydrogenase subunit 7	NO	YES																								0.109
chromosome	1513936	G→T	E238* (GAA→TAA)	slr0265 →	STOP	transposase	NO	YES																										0.055
chromosome	1513955	G→C	S244T (AGT→ACT)	slr0265 →	NON	transposase	YES	NO				0.07
chromosome	1514391	G→T	S316R (AGC→AGA)	dfp ←	NON	pantothenate metabolism flavoprotein	YES	NO										0.117
chromosome	1519401	C→A	A96A (GCC→GCA)	slr0267 →	SYN	ORF_ID:slr0267; hypothetical protein	YES	NO															0.054
chromosome	1519410	A→C	K99N (AAA→AAC)	slr0267 →	NON	ORF_ID:slr0267; hypothetical protein	NO	YES																				0.056
chromosome	1519435	G→T	V108F (GTT→TTT)	slr0267 →	NON	ORF_ID:slr0267; hypothetical protein	YES	NO														0.067
chromosome	1520192	T→G	Q303H (CAA→CAC)	sll0245 ←	NON	ORF_ID:sll0245; hypothetical protein	YES	YES				0.06								0.061										0.064
chromosome	1529015	A→T	P749P (CCT→CCA)	sll0242 ←	SYN	ORF_ID:sll0242; unknown protein	YES	NO										0.05
chromosome	1559508	A→T	L35Q (CTA→CAA)	trxA ←	NON	thiol:disulfide interchange protein; TrxA	YES	NO												0.056
chromosome	1559546	A→C	V22V (GTT→GTG)	trxA ←	SYN	thiol:disulfide interchange protein; TrxA	YES	NO										0.083
chromosome	1570385	A→C	E59D (GAA→GAC)	ftsY →	NON	cell division protein; FtsY	YES	YES					0.066						0.053	0.075								0.063
chromosome	1570415	T→G	D69E (GAT→GAG)	ftsY →	NON	cell division protein; FtsY	YES	YES				0.076															0.05
chromosome	1590606	T→G	P37P (CCT→CCG)	slr1506 →	SYN	ORF_ID:slr1506; unknown protein	YES	NO														0.059
chromosome	1591662	T→G	F389L (TTT→TTG)	slr1506 →	NON	ORF_ID:slr1506; unknown protein	NO	YES																								0.074
chromosome	1594769	A→T	K217N (AAA→AAT)	slr1508 →	NON	ORF_ID:slr1508; unknown protein	NO	YES																								0.058
chromosome	1594775	G→T	W219C (TGG→TGT)	slr1508 →	NON	ORF_ID:slr1508; unknown protein	NO	YES																										0.069
chromosome	1594826	C→A	G236G (GGC→GGA)	slr1508 →	SYN	ORF_ID:slr1508; unknown protein	NO	YES																								0.141
chromosome	1595795	G→T	A171S (GCC→TCC)	ntpJ →	NON	Na+ ‑ATPase subunit J	YES	NO														0.064
chromosome	1603727	C→A	A145S (GCC→TCC)	sll1414 ←	NON	ORF_ID:sll1414; hypothetical protein	YES	NO								0.054
chromosome	1611274	T→G	V183G (GTT→GGT)	hglK →	NON	HglK	YES	YES								0.079														0.053
chromosome	1611385	T→A	L220Q (CTG→CAG)	hglK →	NON	HglK	YES	NO											0.076
chromosome	1634322	A→C	N301H (AAC→CAC)	slr2120 →	NON	ORF_ID:slr2120; unknown protein	YES	YES						0.057																					0.056
chromosome	1634399	T→G	P326P (CCT→CCG)	slr2120 →	SYN	ORF_ID:slr2120; unknown protein	YES	NO				0.054
chromosome	1640058	G→C	E39Q (GAA→CAA)	slr2127 →	NON	ORF_ID:slr2127; unknown protein	NO	YES																									0.051
chromosome	1656076	A→C	I12L (ATT→CTT)	spoT →	NON	(p)ppGpp 3'‑pyrophosphohydrolase	NO	YES																						0.055
chromosome	1670607	A→T	M503L (ATG→TTG)	ymxG →	NON	processing protease	NO	YES																				0.05
chromosome	1670664	G→T	G5G (GGG→GGT)	fabF →	SYN	beta ketoacyl‑acyl carrier protein synthase	NO	YES																									0.103
chromosome	1683763	T→A	Q166H (CAA→CAT)	sll1217 ←	NON	ORF_ID:sll1217; unknown protein	NO	YES																							0.058
chromosome	1693782	G→A	Q294* (CAG→TAG)	sll0816 ←	STOP	ORF_ID:sll0816; hypothetical protein	NO	YES																				0.607
chromosome	1695943	A→C	V285V (GTT→GTG)	sll0814 ←	SYN	ORF_ID:sll0814; unknown protein	YES	YES													0.067					0.067
chromosome	1703520	T→A	K193M (AAG→ATG)	sll0809 ←	NON	ORF_ID:sll0809; unknown protein	YES	YES												0.06								0.061		0.081
chromosome	1703572	G→T	Q176K (CAA→AAA)	sll0809 ←	NON	ORF_ID:sll0809; unknown protein	YES	NO					0.066
chromosome	1709428	T→G	V66G (GTT→GGT)	slr0820 →	NON	glucosyltransferase	YES	NO												0.092
chromosome	1709429	T→G	V66V (GTT→GTG)	slr0820 →	SYN	glucosyltransferase	YES	YES															0.057						0.082					0.058	0.05
chromosome	1709627	T→G	R132R (CGT→CGG)	slr0820 →	SYN	glucosyltransferase	YES	YES											0.066	0.054													0.053
chromosome	1764138	A→C	Y138S (TAT→TCT)	slr1962 →	NON	ORF_ID:slr1962; unknown protein	YES	NO										0.069
chromosome	1771734	T→G	A170A (GCA→GCC)	hisF ←	SYN	cyclase	NO	YES																		0.064					0.079
chromosome	1771752	T→G	E164D (GAA→GAC)	hisF ←	NON	cyclase	YES	YES									0.064									0.058	0.063		0.054
chromosome	1780484	A→C	M1M (ATG→CTG) †	slr1970 →	SYN	ORF_ID:slr1970; unknown protein	YES	NO					0.077
chromosome	1780485	T→G	M1R (ATG→AGG) †	slr1970 →	NON	ORF_ID:slr1970; unknown protein	YES	YES					0.1																	0.106				0.097
chromosome	1796780	A→C	S229R (AGT→AGG)	sll1879 ←	NON	ORF_ID:sll1879; unknown protein	YES	NO										0.086
chromosome	1796782	T→G	S229R (AGT→CGT)	sll1879 ←	NON	ORF_ID:sll1879; unknown protein	YES	NO									0.07
chromosome	1796792	A→C	P225P (CCT→CCG)	sll1879 ←	SYN	ORF_ID:sll1879; unknown protein	YES	YES							0.094							0.055								0.054
chromosome	1832615	C→A	Q86K (CAA→AAA)	slr1474 →	NON	ORF_ID:slr1474; unknown protein	YES	NO													0.065
chromosome	1854763	G→T	R221L (CGG→CTG)	rpoC1 →	NON	RNA polymerase gamma‑subunit	NO	YES																		1
chromosome	1907639	C→A	E36* (GAA→TAA)	sll1433 ←	STOP	ORF_ID:sll1433; hypothetical protein	NO	YES																					0.071
chromosome	1920020	C→A	V177F (GTC→TTC)	sll1095 ←	NON	ORF_ID:sll1095; hypothetical protein	YES	NO											0.066
chromosome	1931782	T→G	L215R (CTG→CGG)	met3 →	NON	sulfate adenylyltransferase	NO	YES																								0.054
chromosome	1938467	A→C	Q13H (CAA→CAC)	slr1170 →	NON	ORF_ID:slr1170; unknown protein	NO	YES																	0.053
chromosome	1972406	A→C	I85L (ATC→CTC)	slr1683 →	NON	transposase	NO	YES																								0.112
chromosome	1973978	A→C	L263R (CTA→CGA)	sll1559 ←	NON	soluble hydrogenase 42 kD subunit	YES	YES														0.082				0.061
chromosome	1974032	A→T	I245N (ATC→AAC)	sll1559 ←	NON	soluble hydrogenase 42 kD subunit	NO	YES																									0.07
chromosome	1999008	A→T	Q183H (CAA→CAT)	nadC →	NON	nicotinate‑nucleotide pyrophosphorylase	YES	YES				1	1	1		1	1	1				1		1				1	1	1	1	1	1	1	1
chromosome	2000350	G→A	G292S (GGT→AGT)	slr0937 →	NON	ORF_ID:slr0937; unknown protein	NO	YES																					1
chromosome	2013327	A→C	T183P (ACC→CCC)	slr0947 →	NON	OmpR subfamily	NO	YES																					1	1	1
chromosome	2013361	A→G	D194G (GAC→GGC)	slr0947 →	NON	OmpR subfamily	NO	YES																									1	1	1
chromosome	2035618	T→G	L49V (TTA→GTA)	slr1624 →	NON	ORF_ID:slr1624; unknown protein	NO	YES																										0.071
chromosome	2037531	A→T	S333T (TCT→ACT)	bgl ←	NON	beta‑glucosidase	YES	NO					0.055
chromosome	2039568	C→A	L10I (CTC→ATC)	slr1627 →	NON	ORF_ID:slr1627; hypothetical protein	YES	NO													0.065
chromosome	2096417	A→C	W42G (TGG→GGG)	sll0419 ←	NON	ORF_ID:sll0419; unknown protein	YES	NO													0.06
chromosome	2107485	T→G	L558W (TTG→TGG)	slr0280 →	NON	ORF_ID:slr0280; unknown protein	NO	YES																	0.063
chromosome	2172175	G→T	D4186Y (GAT→TAT)	slr0408 →	NON	ORF_ID:slr0408; integrin alpha subunit domain homologue	YES	NO														0.052
chromosome	2180739	T→G	L55V (TTG→GTG)	petF →	NON	ferredoxin	YES	NO													0.059
chromosome	2185567	A→C	L73W (TTG→TGG)	sll0149 ←	NON	ORF_ID:sll0149; unknown protein	NO	YES																								0.057
chromosome	2200947	T→G	N5H (AAC→CAC)	sll0142 ←	NON	cation or drug efflux system protein	NO	YES																					0.057
chromosome	2258878	T→G	S269A (TCG→GCG)	slr0990 →	NON	ORF_ID:slr0990; unknown protein	YES	NO						0.056
chromosome	2263848	T→G	L8V (TTA→GTA)	lipB →	NON	LipB protein	YES	YES											0.094											0.088
chromosome	2280652	A→C	F99C (TTT→TGT)	ribC ←	NON	riboflavin synthase alpha chain	YES	NO					0.054
chromosome	2284277	A→C	T162P (ACG→CCG)	xylR →	NON	xylose repressor	YES	YES									0.062														0.066
chromosome	2288418	C→A	G157G (GGC→GGA)	ndhD →	SYN	NADH dehydrogenase subunit 4	YES	YES								0.055												0.105						0.081
chromosome	2297447	T→A	E375V (GAA→GTA)	sll0294 ←	NON	ORF_ID:sll0294; unknown protein	NO	YES																		0.051
chromosome	2297457	C→A	A372S (GCC→TCC)	sll0294 ←	NON	ORF_ID:sll0294; unknown protein	YES	NO				0.076
chromosome	2347854	C→A	L686F (TTG→TTT)	sll0350 ←	NON	ORF_ID:sll0350; unknown protein	NO	YES																							0.087
chromosome	2350805	T→A	L145Q (CTG→CAG)	slr0363 →	NON	ORF_ID:slr0363; unknown protein	NO	YES																					0.102
chromosome	2353159	C→A	Q613K (CAA→AAA)	slr0364 →	NON	ORF_ID:slr0364; unknown protein	YES	NO									0.055
chromosome	2360056	A→C	N2912H (AAC→CAC)	slr0364 →	NON	ORF_ID:slr0364; unknown protein	YES	YES												0.054													0.062
chromosome	2364020	Δ1 bp	coding (3564/5229 nt)	slr0366 →	INDEL	ORF_ID:slr0366; unknown protein	NO	YES																					0.051
chromosome	2371584	A→T	L176H (CTC→CAC)	sphS ←	NON	regulation of the phosphate regulon	YES	YES				0.075		0.085								0.15	0.141		0.092	0.077							0.079	0.134
chromosome	2371603	T→G	R170R (AGG→CGG)	sphS ←	SYN	regulation of the phosphate regulon	YES	NO								0.13
chromosome	2371611	A→C	I167S (ATT→AGT)	sphS ←	NON	regulation of the phosphate regulon	YES	NO															0.065
chromosome	2401150	A→C	Q79H (CAA→CAC)	secD →	NON	protein‑export membrane protein; SecD	YES	YES				0.062																			0.065		0.094
chromosome	2404646	T→A	E108V (GAA→GTA)	rpl20 ←	NON	50S ribosomal protein L20	NO	YES																		0.051								0.057
chromosome	2404650	T→A	S107C (AGT→TGT)	rpl20 ←	NON	50S ribosomal protein L20	YES	NO															0.055
chromosome	2404654	A→C	A105A (GCT→GCG)	rpl20 ←	SYN	50S ribosomal protein L20	NO	YES																		0.073
chromosome	2430134	C→A	Q198K (CAA→AAA)	rfbW →	NON	mannosyl transferase	NO	YES																				0.079
chromosome	2497884	T→G	P53P (CCT→CCG)	recG →	SYN	DNA recombinase	YES	YES												0.092						0.077
chromosome	2497887	T→G	G54G (GGT→GGG)	recG →	SYN	DNA recombinase	YES	NO				0.058
chromosome	2497890	T→G	S55R (AGT→AGG)	recG →	NON	DNA recombinase	YES	YES						0.063						0.068	0.07												0.056
chromosome	2498011	C→A	R96S (CGT→AGT)	recG →	NON	DNA recombinase	YES	NO															0.06
chromosome	2498022	G→T	L99F (TTG→TTT)	recG →	NON	DNA recombinase	YES	YES														0.058										0.067
chromosome	2502694	A→C	N395K (AAT→AAG)	ponA ←	NON	penicillin‑binding protein 1A	YES	NO													0.055
chromosome	2507062	G→T	C311F (TGT→TTT)	slr0214 →	NON	cytosine‑specific methyltransferase	YES	NO											0.06			0.09
chromosome	2510428	G→C	Q290E (CAA→GAA)	sll0209 ←	NON	ORF_ID:sll0209; hypothetical protein	NO	YES																1
chromosome	2547012	T→G	K6Q (AAG→CAG)	sll0410 ←	NON	ORF_ID:sll0410; unknown protein	YES	NO						0.076
chromosome	2551155	A→T	S135C (AGC→TGC)	ccmK →	NON	carbon dioxide concentrating mechanism protein; CcmK	YES	NO													0.122
chromosome	2551174	T→G	L141R (CTA→CGA)	ccmK →	NON	carbon dioxide concentrating mechanism protein; CcmK	NO	YES																								0.093
chromosome	2551178	G→T	L142F (TTG→TTT)	ccmK →	NON	carbon dioxide concentrating mechanism protein; CcmK	YES	NO													0.067
chromosome	2594192	A→C	Q46H (CAA→CAC)	ribG →	NON	riboflavin biosynthesis protein	YES	YES							0.085					0.118		0.062				0.096				0.107	0.112		0.12
chromosome	2613833	T→G	G39G (GGT→GGG)	purN →	SYN	phosphoribosylglycinamide formyltransferase	YES	NO							0.054
chromosome	2636881	G→T	Q250K (CAA→AAA)	pstB ←	NON	phosphate transport ATP‑binding protein; PstB	YES	NO						0.08								0.066
chromosome	2657594	T→G	M1M (ATG→CTG) †	sll0611 ←	SYN	ORF_ID:sll0611; unknown protein	YES	YES									0.076		0.065							0.081			0.057	0.08
chromosome	2680983	A→T	I297N (ATC→AAC)	dgt ←	NON	dGTP triphosphohydrolase	YES	NO													0.063
chromosome	2682603	T→G	E208D (GAA→GAC)	sll0396 ←	NON	OmpR subfamily	NO	YES																					0.051
chromosome	2699474	T→G	A101A (GCT→GCG)	slr0420 →	SYN	ORF_ID:slr0420; unknown protein	YES	NO						0.071						0.096
chromosome	2713053	G→T	L85I (CTT→ATT)	sll0371 ←	NON	ORF_ID:sll0371; unknown protein	YES	NO											0.054	0.054
chromosome	2713071	G→T	P79T (CCA→ACA)	sll0371 ←	NON	ORF_ID:sll0371; unknown protein	NO	YES																									0.06
chromosome	2713099	C→A	L69F (TTG→TTT)	sll0371 ←	NON	ORF_ID:sll0371; unknown protein	YES	YES							0.078				0.067						0.067	0.075
chromosome	2714938	T→G	K584T (AAA→ACA)	carB ←	NON	carbamoyl‑phosphate synthase, pyrimidine‑specific, large chain	YES	YES				0.061									0.05			0.05									0.083
chromosome	2721706	A→C	F177V (TTC→GTC)	sll0188 ←	NON	ORF_ID:sll0188; unknown protein	YES	NO													0.059
chromosome	2733752	A→C	Q224H (CAA→CAC)	hdrB →	NON	heterodisulfide reductase subunit B	NO	YES																		0.065
chromosome	2744040	T→A	I249N (ATT→AAT)	slr0207 →	NON	ORF_ID:slr0207; unknown protein	YES	NO													0.054
chromosome	2747639	A→C	Q12H (CAA→CAC)	slr0210 →	NON	sensory transduction histidine kinase	YES	NO					0.062					0.088
chromosome	2776594	T→G	H276Q (CAT→CAG)	slr0904 →	NON	ORF_ID:slr0904; hypothetical protein	YES	NO												0.057
chromosome	2781745	G→T	D115Y (GAT→TAT)	slr0907 →	NON	ORF_ID:slr0907; unknown protein	NO	YES																			0.087
chromosome	2781751	C→A	Q117K (CAA→AAA)	slr0907 →	NON	ORF_ID:slr0907; unknown protein	YES	YES						0.062													0.134
chromosome	2868668	T→G	V251G (GTG→GGG)	slr0848 →	NON	ORF_ID:slr0848; hypothetical protein	NO	YES																				0.075					0.082
chromosome	2888839	G→T	R399L (CGG→CTG)	deaD →	NON	ATP‑dependent RNA helicase; DeaD	NO	YES																								1
chromosome	2909615	A→C	L63V (TTG→GTG)	sll0486 ←	NON	ORF_ID:sll0486; PCC7942 clock gene...ORFE	YES	NO														0.087	0.057
chromosome	2911607	A→C	F85V (TTT→GTT)	sll0484 ←	NON	ABC transporter	NO	YES																				0.073
chromosome	2927729	C→A	G658W (GGG→TGG)	sll0474 ←	NON	sensory transduction histidine kinase	NO	YES																			0.053
chromosome	2927765	T→A	K646* (AAG→TAG)	sll0474 ←	STOP	sensory transduction histidine kinase	YES	NO					0.066
chromosome	2942656	T→A	K76N (AAA→AAT)	sll0597 ←	NON	ORF_ID:sll0597; hypothetical protein	YES	NO													0.061
chromosome	2942661	C→A	E75* (GAA→TAA)	sll0597 ←	STOP	ORF_ID:sll0597; hypothetical protein	YES	NO						0.096
chromosome	2987931	T→G	N227H (AAC→CAC)	sll0096 ←	NON	ORF_ID:sll0096; unknown protein	NO	YES																							0.111
chromosome	2987934	G→T	Q226K (CAA→AAA)	sll0096 ←	NON	ORF_ID:sll0096; unknown protein	NO	YES																									0.104
chromosome	2987971	T→G	Q213H (CAA→CAC)	sll0096 ←	NON	ORF_ID:sll0096; unknown protein	NO	YES																			0.075
chromosome	2993968	T→G	I155S (ATT→AGT)	slr0112 →	NON	ORF_ID:slr0112; unknown protein	YES	YES				0.062									0.064		0.056										0.067
chromosome	3003503	A→C	T180P (ACG→CCG)	slr0121 →	NON	ORF_ID:slr0121; unknown protein	YES	YES								0.076																	0.056
chromosome	3003517	A→C	E184D (GAA→GAC)	slr0121 →	NON	ORF_ID:slr0121; unknown protein	YES	YES													0.086					0.06			0.062			0.069	0.074		0.121
chromosome	3037493	G→C	V62L (GTT→CTT)	slr0315 →	NON	ORF_ID:slr0315; hypothetical protein	NO	YES																	1		1
chromosome	3067121	G→T	A125S (GCC→TCC)	slr0800 →	NON	transposase	YES	NO									0.071
chromosome	3074098	G→T	A214E (GCA→GAA)	sll0782 ←	NON	putative protein kinase	YES	NO														0.054
chromosome	3101375	T→G	E64D (GAA→GAC)	sll0672 ←	NON	cation‑transporting ATPase; E1‑E2 ATPase	NO	YES																						0.062	0.064
chromosome	3143947	C→A	G79W (GGG→TGG)	sll0044 ←	NON	ORF_ID:sll0044; unknown protein	YES	NO						0.058
chromosome	3147633	T→G	Q263H (CAA→CAC)	sll0043 ←	NON	CheA like protein	YES	NO														0.068
chromosome	3151491	T→G	M163L (ATG→CTG)	sll0041 ←	NON	tsr or; CheD	YES	YES					0.052											0.05
chromosome	3154633	A→T	S10T (TCA→ACA)	sll0038 ←	NON	PatA subfamily	NO	YES																						0.094
chromosome	3162779	C→A	A489S (GCC→TCC)	sll0033 ←	NON	ORF_ID:sll0033; unknown protein	YES	NO													0.095
chromosome	3163025	T→G	I407L (ATC→CTC)	sll0033 ←	NON	ORF_ID:sll0033; unknown protein	NO	YES																									0.05
chromosome	3174137	C→A	T268N (ACC→AAC)	nrtC →	NON	nitrate transport protein; NrtC	YES	NO															0.058
chromosome	3181140	G→A	A133V (GCC→GTC)	sll0518 ←	NON	ORF_ID:sll0518; unknown protein	YES	YES				1	1	1	1	1	1	1	1	1	1	1	1	1	1	1	1	1	1	1	1	1	1	1	1
chromosome	3185900	A→T	I390F (ATT→TTT)	murE →	NON	UDP‑MurNac‑tripeptide synthetase	YES	NO													0.091
chromosome	3185906	A→T	I392L (ATA→TTA)	murE →	NON	UDP‑MurNac‑tripeptide synthetase	NO	YES																										0.056
chromosome	3195783	T→G	G595G (GGT→GGG)	slt →	SYN	soluble lytic transglycosylase	NO	YES																			0.064
chromosome	3199322	A→C	I198L (ATC→CTC)	hemE →	NON	uroporphyrinogen decarboxylase	YES	YES												0.064							0.051
chromosome	3204849	A→C	V268G (GTT→GGT)	sll0505 ←	NON	ORF_ID:sll0505; hypothetical protein	NO	YES																									0.05
chromosome	3238625	G→T	Q82K (CAA→AAA)	sll0896 ←	NON	Holliday juction resolvase; RuvC	NO	YES																							0.084
chromosome	3240255	A→C	E25D (GAA→GAC)	trpC →	NON	indole‑3‑glycerol phosphate synthase	YES	NO							0.055
chromosome	3259369	A→C	V173V (GTT→GTG)	sll0529 ←	SYN	ORF_ID:sll0529; unknown protein	NO	YES																							0.063
chromosome	3271508	A→C	Q353P (CAG→CCG)	pyrD →	NON	dihydroorotate dehydrogenase	NO	YES																		0.146						0.103
chromosome	3283284	T→G	E41D (GAA→GAC)	sll1340 ←	NON	ORF_ID:sll1340; unknown protein	YES	YES													0.054		0.063	0.052
chromosome	3286904	C→G	E89Q (GAA→CAA)	sll1336 ←	NON	ORF_ID:sll1336; hypothetical protein	YES	YES				0.087		0.084						0.061	0.117		0.101			0.096		0.1				0.051
chromosome	3298825	C→A	P167Q (CCA→CAA)	sbpA →	NON	sulfate binding protein; SbpA	NO	YES																	0.06
chromosome	3306427	G→T	P783T (CCA→ACA)	sll1366 ←	NON	helicase of the snf2/rad54 family	NO	YES																											0.055
chromosome	3306444	G→T	T777N (ACC→AAC)	sll1366 ←	NON	helicase of the snf2/rad54 family	NO	YES																				0.062
chromosome	3306453	G→T	T774N (ACC→AAC)	sll1366 ←	NON	helicase of the snf2/rad54 family	YES	YES								0.07																0.075
chromosome	3319419	T→G	L47V (TTG→GTG)	hisA →	NON	phosphorybosilformimino‑5‑amino‑phosphorybosil‑ 4‑imidazolecarboxamideisomerase	NO	YES																				0.087
chromosome	3323561	G→T	R96L (CGT→CTT)	rpoDI →	NON	RNA polymerase sigma factor	YES	YES				1	1	1	1	1	1	1	1	1	1	1	1	1	1	1	1	1	1	1	1	1	1	1	1
chromosome	3353444	G→T	L83F (TTG→TTT)	slr0668 →	NON	ORF_ID:slr0668; unknown protein	NO	YES																							0.054
chromosome	3355884	C→A	L993F (TTG→TTT)	gltB ←	NON	ferredoxin‑dependent glutamate synthase	YES	YES													0.054				0.068									0.077
chromosome	3362629	Δ8 bp	coding (573‑580/1110 nt)	slr1557 →	INDEL	ORF_ID:slr1557; unknown protein	NO	YES																		1
chromosome	3380463	A→C	M112L (ATG→CTG)	slr1570 →	NON	ORF_ID:slr1570; unknown protein	YES	NO				0.066								0.076
chromosome	3415169	G→T	E113* (GAA→TAA)	slr0748 →	STOP	ORF_ID:slr0748; unknown protein	YES	NO												0.055
chromosome	3421017	G→C	R201P (CGA→CCA)	eno →	NON	enolase	YES	NO											0.051
chromosome	3423662	G→T	E211* (GAG→TAG)	p →	STOP	P protein	NO	YES																		0.051
chromosome	3440941	G→T	L302I (CTT→ATT)	sll0723 ←	NON	ORF_ID:sll0723; unknown protein	YES	NO													0.05
chromosome	3441553	C→A	D98Y (GAT→TAT)	sll0723 ←	NON	ORF_ID:sll0723; unknown protein	NO	YES																									0.058
chromosome	3450391	G→T	G155V (GGA→GTA)	hlyB →	NON	haemolysin secretion ATP‑binding protein	NO	YES																		0.065					0.053
chromosome	3491003	G→T	L167I (CTA→ATA)	sll0445 ←	NON	ORF_ID:sll0445; unknown protein	NO	YES																										0.051
chromosome	3491031	A→C	A157A (GCT→GCG)	sll0445 ←	SYN	ORF_ID:sll0445; unknown protein	YES	YES													0.094										0.089		0.081
chromosome	3521007	T→G	T230P (ACG→CCG)	prfA ←	NON	peptide chain release factor	YES	NO												0.054
chromosome	3534417	C→G	L192V (CTG→GTG)	argG →	NON	argininosuccinate synthetase	NO	YES																0.311
chromosome	3534864	G→A	V341M (GTG→ATG)	argG →	NON	argininosuccinate synthetase	NO	YES																0.11
chromosome	3558729	A→C	S417R (AGC→CGC)	slr0599 →	NON	eukaryotic protein kinase	NO	YES																										0.061
chromosome	3565442	A→T	D202V (GAC→GTC)	lepA →	NON	LepA gene product	NO	YES																								0.052
chromosome	442,222:1	+T	coding (59/1770 nt)	ycf45 →	INDEL	ORF_ID:slr0692; hypothetical protein	NO	YES																1

## Sheet: non-synonymous
genomic entity	position	mutation	annotation	locus	mut type	function	annotated function?	in FL0	in FL+	WT	LT_initial	LT_final	FL0_1	FL0_2	FL0_3	FL0_4	FL0_5	FL0_6	FL0_7	FL0_8	FL0_9	FL0_10	FL0_11	FL0_12	FL+_13	FL+_14	FL+_15	FL+_16	FL+_17	FL+_18	FL+_19	FL+_20	FL+_21	FL+_22	FL+_23	FL+_24
pSYSG	4849	C→A	D400Y (GAT→TAT)	sll8006 ←	NON	type I restriction‑modification system S subunit	NO	YES	NO													0.051
pSYSG	11474	G→T	K159N (AAG→AAT)	slr8016 →	NON	plasmid partitioning protein	NO	YES	NO					0.118
pSYSA	14283	A→T	Y21F (TAC→TTC)	slr7015 →	NON	ORF_ID:slr7015; hypothetical protein	NO	NO	YES																											0.058
pSYSA	21198	G→T	E311D (GAG→GAT)	slr7023 →	NON	ORF_ID:slr7023; hypothetical protein	NO	YES	NO						0.143
pSYSA	21260	C→T	P332L (CCA→CTA)	slr7023 →	NON	ORF_ID:slr7023; hypothetical protein	NO	YES	NO						0.237
pSYSA	21276	T→G	D337E (GAT→GAG)	slr7023 →	NON	ORF_ID:slr7023; hypothetical protein	NO	YES	NO						0.208
pSYSA	21809	C→T	S515L (TCG→TTG)	slr7023 →	NON	ORF_ID:slr7023; hypothetical protein	NO	NO	YES																		0.059				0.06
pSYSA	21815	C→T	P517L (CCG→CTG)	slr7023 →	NON	ORF_ID:slr7023; hypothetical protein	NO	NO	YES																		0.067				0.061
chromosome	24168	C→A	G326V (GGT→GTT)	sll1202 ←	NON	ORF_ID:sll1202; unknown protein	NO	NO	YES																									0.06
pSYSG	36173	A→C	K1159T (AAG→ACG)	slr8038 →	NON	WD‑repeat protein	NO	NO	YES																		0.103
pSYSA	37628	T→G	S171R (AGT→CGT)	sll7043 ←	NON	unknown protein	NO	NO	YES																						0.08
pSYSM	44691	G→T	R389S (CGC→AGC)	sll5047 ←	NON	unknown protein	NO	YES	NO														0.063
pSYSA	49334	A→G	N182S (AAC→AGC)	slr7059 →	NON	ORF_ID:slr7059; hypothetical protein	NO	NO	YES																								0.721
pSYSM	56871	G→T	R313S (CGT→AGT)	sll5057 ←	NON	ORF_ID:sll5057; probable glycosyltransferase	NO	YES	YES											0.062													0.069
pSYSM	62712	T→G	K707T (AAA→ACA)	sll5060 ←	NON	two‑component hybrid sensor and regulator	NO	YES	YES				0.053						0.06													0.051	0.06
pSYSM	67884	T→A	K31N (AAA→AAT)	sll5066 ←	NON	ORF_ID:sll5066; probable plasmid partitioning protein, ParA family	NO	NO	YES																						0.061
chromosome	77107	A→C	Y101D (TAT→GAT)	dapB ←	NON	dihydrodipicolinate reductase	YES	YES	NO											0.053
chromosome	83741	T→G	K38T (AAA→ACA)	sll1053 ←	NON	ORF_ID:sll1053; hypothetical protein	NO	YES	YES				0.071							0.079	0.092						0.057	0.06		0.065		0.061		0.057
pSYSX	90184	T→G	F68C (TTT→TGT)	slr6096 →	NON	ORF_ID:slr6096; type I restriction‑modification system, M subunit (fragment)	NO	YES	NO						0.059
pSYSX	92679	G→T	S222Y (TCC→TAC)	sll6098 ←	NON	ORF_ID:sll6098; hypothetical protein	NO	YES	YES						0.064																		0.053
pSYSX	92723	C→A	L207F (TTG→TTT)	sll6098 ←	NON	ORF_ID:sll6098; hypothetical protein	NO	YES	YES				0.064	0.103	0.067		0.056										0.065
pSYSX	92730	G→T	T205N (ACT→AAT)	sll6098 ←	NON	ORF_ID:sll6098; hypothetical protein	NO	YES	NO														0.051
pSYSX	92740	A→C	L202V (TTG→GTG)	sll6098 ←	NON	ORF_ID:sll6098; hypothetical protein	NO	YES	NO					0.081
pSYSA	95242	G→T	L175F (TTG→TTT)	slr7097 →	NON	ORF_ID:slr7097; hypothetical protein	NO	NO	YES																								0.056
pSYSM	96448	T→A	Y109N (TAC→AAC)	slr5101 →	NON	ORF_ID:slr5101; hypothetical protein	NO	YES	YES														0.056										0.059
pSYSM	96458	G→T	G112V (GGA→GTA)	slr5101 →	NON	ORF_ID:slr5101; hypothetical protein	NO	YES	NO							0.068
pSYSM	106152	T→G	N74H (AAC→CAC)	ssl5114 ←	NON	unknown protein	NO	YES	YES						0.064			0.106												0.082
pSYSM	106798	C→A	L88I (CTA→ATA)	slr5115 →	NON	ORF_ID:slr5115; hypothetical protein	NO	NO	YES																								0.065
chromosome	124629	G→C	F605L (TTC→TTG)	dfr ←	NON	drug sensory protein A	YES	NO	YES																		1
chromosome	125267	T→C	T393A (ACC→GCC)	dfr ←	NON	drug sensory protein A	YES	NO	YES																	1		1
chromosome	134961	A→C	K175N (AAA→AAC)	infB →	NON	initiation factor IF‑2	YES	YES	NO											0.061
chromosome	156743	A→T	*91K (TAA→AAA)	ssl0410 ←	NON	ORF_ID:ssl0410; unknown protein	NO	YES	YES												0.089							0.057
chromosome	190150	T→G	L40V (TTG→GTG)	slr1094 →	NON	ORF_ID:slr1094; unknown protein	NO	YES	NO													0.163
chromosome	190153	A→T	S41C (AGT→TGT)	slr1094 →	NON	ORF_ID:slr1094; unknown protein	NO	YES	YES				0.125															0.126
chromosome	190160	A→T	E43V (GAG→GTG)	slr1094 →	NON	ORF_ID:slr1094; unknown protein	NO	NO	YES																			0.065
chromosome	217642	A→C	V229G (GTT→GGT)	ccmM ←	NON	carbon dioxide concentrating mechanism protein; CcmM	YES	YES	NO											0.054
chromosome	246673	A→C	F116C (TTT→TGT)	malQ ←	NON	4‑alpha‑glucanotransferase	YES	NO	YES																								0.057
chromosome	277327	G→T	W300L (TGG→TTG)	slr1799 →	NON	ORF_ID:slr1799; unknown protein	NO	NO	YES																				0.056
chromosome	278254	T→G	L609R (CTT→CGT)	slr1799 →	NON	ORF_ID:slr1799; unknown protein	NO	NO	YES																											0.112
chromosome	297208	G→T	L711F (TTG→TTT)	slr1298 →	NON	ORF_ID:slr1298; hypothetical protein	NO	NO	YES																				0.064
chromosome	297223	G→T	L716F (TTG→TTT)	slr1298 →	NON	ORF_ID:slr1298; hypothetical protein	NO	NO	YES																			0.056	0.088
chromosome	305454	T→G	L506V (TTG→GTG)	slr1301 →	NON	ORF_ID:slr1301; unknown protein	NO	NO	YES																									0.092
chromosome	305471	G→T	L511F (TTG→TTT)	slr1301 →	NON	ORF_ID:slr1301; unknown protein	NO	YES	NO											0.057
chromosome	312637	T→G	L127R (CTA→CGA)	slr1306 →	NON	ORF_ID:slr1306; unknown protein	NO	NO	YES																					0.052
chromosome	321738	A→C	K14Q (AAG→CAG)	sir →	NON	ferredoxin‑sulfite reductase	YES	NO	YES																							0.057
chromosome	321742	T→G	V15G (GTA→GGA)	sir →	NON	ferredoxin‑sulfite reductase	YES	YES	NO									0.065
chromosome	331716	A→C	Q191H (CAA→CAC)	cbiH →	NON	precorrin methylase	YES	YES	NO												0.086
chromosome	335959	T→C	S113G (AGC→GGC)	sll0933 ←	NON	ORF_ID:sll0933; unknown protein	NO	YES	YES				1	1	1	1	1	1	1	1	1	1	1	1	1	1	1	1	1	1	1	1	1	1	1	1
chromosome	347692	T→A	R39W (AGG→TGG)	epsB ←	NON	exopolysaccharide export protein	YES	NO	YES																				0.081
chromosome	347715	A→C	L31R (CTT→CGT)	epsB ←	NON	exopolysaccharide export protein	YES	YES	YES							0.091												0.09
chromosome	365954	G→T	S80I (AGT→ATT)	slr1063 →	NON	ORF_ID:slr1063; hypothetical protein	NO	YES	NO				0.126
chromosome	379321	C→T	A86V (GCC→GTC)	slr1075 →	NON	transposase	NO	NO	YES																									0.061
chromosome	389818	T→G	Q179P (CAG→CCG)	sll1025 ←	NON	ORF_ID:sll1025; unknown protein	NO	YES	NO					0.1
chromosome	389827	T→G	N176T (AAC→ACC)	sll1025 ←	NON	ORF_ID:sll1025; unknown protein	NO	YES	YES													0.108											0.07
chromosome	418522	C→A	A441E (GCA→GAA)	fmu_fmv →	NON	Fmu and Fmv protein	YES	NO	YES																				0.119	0.062						0.072
chromosome	443761	A→G	E533G (GAA→GGA)	ycf45 →	NON	ORF_ID:slr0692; hypothetical protein	YES	NO	YES																					1
chromosome	470037	A→C	N149T (AAC→ACC)	slr1603 →	NON	ORF_ID:slr1603; hypothetical protein	NO	NO	YES																		0.08					0.103
chromosome	489322	T→A	L679H (CTC→CAC)	slr1609 →	NON	long‑chain‑fatty‑acid CoA ligase	NO	NO	YES																							0.074
chromosome	489325	A→C	K680T (AAA→ACA)	slr1609 →	NON	long‑chain‑fatty‑acid CoA ligase	NO	NO	YES																									0.076
chromosome	501564	C→G	E143Q (GAA→CAA)	sll1011 ←	NON	ORF_ID:sll1011; hypothetical protein	NO	YES	YES								0.12																		0.147
chromosome	501571	A→T	H140Q (CAT→CAA)	sll1011 ←	NON	ORF_ID:sll1011; hypothetical protein	NO	YES	YES					0.06			0.05		0.068	0.079						0.056		0.059						0.054
chromosome	501596	T→G	N132T (AAC→ACC)	sll1011 ←	NON	ORF_ID:sll1011; hypothetical protein	NO	YES	NO						0.052						0.06	0.098	0.07	0.079
chromosome	501602	T→G	N130T (AAC→ACC)	sll1011 ←	NON	ORF_ID:sll1011; hypothetical protein	NO	YES	NO													0.065
chromosome	501607	C→G	Q128H (CAG→CAC)	sll1011 ←	NON	ORF_ID:sll1011; hypothetical protein	NO	YES	YES													0.122							0.062
chromosome	527837	A→T	E1164D (GAA→GAT)	slr1753 →	NON	ORF_ID:slr1753; unknown protein	NO	NO	YES																	0.188
chromosome	530947	A→T	W97R (TGG→AGG)	sll1647 ←	NON	ORF_ID:sll1647; hypothetical protein	NO	NO	YES																	1		1
chromosome	555586	T→G	L109V (TTG→GTG)	slr1847 →	NON	ORF_ID:slr1847; hypothetical protein	NO	NO	YES																	0.109
chromosome	577060	A→T	N903K (AAT→AAA)	gyrA ←	NON	DNA gyrase A subunit	YES	NO	YES																											0.074
chromosome	614842	T→G	M1R (ATG→AGG) †	slr1911 →	NON	ORF_ID:slr1911; unknown protein	NO	YES	NO													0.057
chromosome	614860	T→G	I7R (ATA→AGA)	slr1911 →	NON	ORF_ID:slr1911; unknown protein	NO	YES	YES													0.07						0.087
chromosome	630595	T→G	K333T (AAG→ACG)	sll0998 ←	NON	LysR transcriptional regulator	NO	NO	YES																											0.086
chromosome	630606	T→G	Q329H (CAA→CAC)	sll0998 ←	NON	LysR transcriptional regulator	NO	YES	YES										0.09										0.098
chromosome	630619	T→G	N325T (AAC→ACC)	sll0998 ←	NON	LysR transcriptional regulator	NO	NO	YES																		0.054
chromosome	664693	A→C	L30V (TTG→GTG)	sll0986 ←	NON	transposase	NO	YES	YES						0.054																0.062
chromosome	693714	C→T	V500M (GTG→ATG)	rnb ←	NON	ribonuclease II	YES	NO	YES																				1
chromosome	700275	T→G	F436V (TTC→GTC)	feoB →	NON	ferrous iron transport protein B	YES	YES	NO													0.057
chromosome	715293	T→G	E287D (GAA→GAC)	lig ←	NON	DNA ligase	YES	NO	YES																									0.066
chromosome	727349	A→G	S40P (TCT→CCT)	cpcB ←	NON	phycocyanin b subunit	YES	NO	YES																						1	1
chromosome	784869	T→A	V34D (GTC→GAC)	slr1134 →	NON	ORF_ID:slr1134; hypothetical protein	NO	YES	YES													0.067												0.071		0.082
chromosome	815288	G→T	S497I (AGT→ATT)	slr1149 →	NON	ABC transporter	NO	YES	NO									0.065
chromosome	828820	C→T	D82N (GAT→AAT)	rpl17 ←	NON	50S ribosomal protein L17	YES	YES	NO															0.052
chromosome	831484	C→A	L25F (TTG→TTT)	infA ←	NON	initiation factor IF‑1	YES	NO	YES																										0.126
chromosome	831493	G→T	F22L (TTC→TTA)	infA ←	NON	initiation factor IF‑1	YES	YES	NO				0.075
chromosome	858495	G→T	T791N (ACC→AAC)	rpoB ←	NON	RNA polymerase beta subunit	YES	NO	YES																									1	1	1
chromosome	865764	A→C	I205S (ATT→AGT)	sll1124 ←	NON	sensory transduction histidine kinase	NO	YES	YES										0.085													0.063			0.063
chromosome	865785	A→C	L198R (CTG→CGG)	sll1124 ←	NON	sensory transduction histidine kinase	NO	YES	YES										0.072											0.058
chromosome	871563	A→C	L570V (TTG→GTG)	sll1120 ←	NON	chromosome segregation protein SMC1	NO	YES	YES														0.154				0.137					0.166		0.109
chromosome	989034	T→G	T158P (ACG→CCG)	sll1464 ←	NON	ORF_ID:sll1464; hypothetical protein	NO	YES	YES														0.079				0.076
chromosome	989035	T→G	E157D (GAA→GAC)	sll1464 ←	NON	ORF_ID:sll1464; hypothetical protein	NO	YES	YES												0.056						0.077
chromosome	996540	A→C	E422D (GAA→GAC)	lysS →	NON	lysyl‑tRNA synthetase	YES	YES	YES														0.091								0.093
chromosome	1007846	T→G	K134T (AAA→ACA)	nrtC ←	NON	nitrate transport protein; NrtC	YES	NO	YES																			0.119
chromosome	1007860	T→G	Q129H (CAA→CAC)	nrtC ←	NON	nitrate transport protein; NrtC	YES	YES	YES						0.098																	0.116
chromosome	1030834	T→G	L214V (TTG→GTG)	purC →	NON	phosphoribosyl aminoidazole succinocarboxamide synthetase	YES	YES	YES												0.102	0.071												0.102
chromosome	1030851	G→C	Q219H (CAG→CAC)	purC →	NON	phosphoribosyl aminoidazole succinocarboxamide synthetase	YES	NO	YES																						0.063
chromosome	1059576	A→C	N347T (AAT→ACT)	pmbA →	NON	PmbA protein	YES	YES	NO							0.051
chromosome	1065939	T→G	K1024N (AAA→AAC)	dnaX ←	NON	DNA polymerase III subunit	YES	YES	NO												0.059
chromosome	1066233	T→G	E926D (GAA→GAC)	dnaX ←	NON	DNA polymerase III subunit	YES	YES	NO										0.08
chromosome	1123506	G→T	Q176K (CAA→AAA)	sll1267 ←	NON	ORF_ID:sll1267; unknown protein	NO	YES	NO					0.069
chromosome	1137531	T→G	F53V (TTT→GTT)	slr0878 →	NON	ORF_ID:slr0878; hypothetical protein	NO	YES	NO													0.057
chromosome	1137538	C→G	S55C (TCC→TGC)	slr0878 →	NON	ORF_ID:slr0878; hypothetical protein	NO	NO	YES																									0.061
chromosome	1144864	A→C	K46T (AAG→ACG)	psr →	NON	regulation of penicillin binding protein 5 production	YES	NO	YES																		0.059
chromosome	1172808	A→C	E746D (GAA→GAC)	slr1403 →	NON	ORF_ID:slr1403; integrin alpha‑ and beta4‑ subunit domain homologue	NO	YES	NO												0.054
chromosome	1178173	C→G	R2535G (CGT→GGT)	slr1403 →	NON	ORF_ID:slr1403; integrin alpha‑ and beta4‑ subunit domain homologue	NO	YES	NO				0.054
chromosome	1178245	A→C	N2559H (AAC→CAC)	slr1403 →	NON	ORF_ID:slr1403; integrin alpha‑ and beta4‑ subunit domain homologue	NO	NO	YES																				0.052
chromosome	1178329	A→C	T2587P (ACT→CCT)	slr1403 →	NON	ORF_ID:slr1403; integrin alpha‑ and beta4‑ subunit domain homologue	NO	YES	NO										0.055
chromosome	1275418	A→T	M247K (ATG→AAG)	sll1710 ←	NON	transposase	NO	NO	YES																									0.07
chromosome	1275437	G→T	P241T (CCT→ACT)	sll1710 ←	NON	transposase	NO	NO	YES																									0.075
chromosome	1287745	T→G	N340T (AAC→ACC)	sll1699 ←	NON	extracellular solute‑binding protein	NO	NO	YES																									0.058
chromosome	1288841	T→G	N91T (AAT→ACT)	sll1698 ←	NON	ORF_ID:sll1698; unknown protein	NO	NO	YES																		0.055
chromosome	1336429	C→A	P287T (CCT→ACT)	slr1747 →	NON	ORF_ID:slr1747; hypothetical protein	NO	NO	YES																				0.065	0.105				0.073
chromosome	1364962	G→T	P168T (CCC→ACC)	sll0837 ←	NON	ORF_ID:sll0837; unknown protein	NO	YES	NO									0.069
chromosome	1364993	C→A	L157F (TTG→TTT)	sll0837 ←	NON	ORF_ID:sll0837; unknown protein	NO	YES	NO								0.062
chromosome	1364997	T→A	D156V (GAT→GTT)	sll0837 ←	NON	ORF_ID:sll0837; unknown protein	NO	NO	YES																	0.114
chromosome	1371729	T→G	W188G (TGG→GGG)	slr0872 →	NON	ORF_ID:slr0872; unknown protein	NO	YES	NO				0.06			0.051
chromosome	1375727	G→T	G126V (GGA→GTA)	slr1243 →	NON	ORF_ID:slr1243; unknown protein	NO	NO	YES																										0.067
chromosome	1375780	G→T	D144Y (GAT→TAT)	slr1243 →	NON	ORF_ID:slr1243; unknown protein	NO	NO	YES																										0.068
chromosome	1375786	G→T	D146Y (GAT→TAT)	slr1243 →	NON	ORF_ID:slr1243; unknown protein	NO	YES	NO											0.053
chromosome	1381040	A→T	I284N (ATC→AAC)	sll1161 ←	NON	adenylate cyclase	NO	YES	NO														0.061
chromosome	1384680	G→T	D285Y (GAT→TAT)	slr1245 →	NON	transcriptional regulator	NO	NO	YES																								0.059
chromosome	1393381	A→T	E137V (GAA→GTA)	cyp →	NON	peptidyl‑prolyl cis‑trans isomerase	YES	YES	NO														0.068
chromosome	1405598	A→C	S55R (AGC→CGC)	slr1261 →	NON	ORF_ID:slr1261; hypothetical protein	NO	NO	YES																											0.069
chromosome	1409502	G→T	Q50K (CAA→AAA)	sll1961 ←	NON	ORF_ID:sll1961; unknown protein	NO	YES	NO											0.062
chromosome	1414572	A→T	E149D (GAA→GAT)	topA →	NON	DNA topoisomerase I	YES	NO	YES																	1		1
chromosome	1415635	A→G	T504A (ACC→GCC)	topA →	NON	DNA topoisomerase I	YES	NO	YES																					1	1	1
chromosome	1417306	A→C	Q8P (CAA→CCA)	slr2060 →	NON	ORF_ID:slr2060; unknown protein	NO	YES	YES														0.069									0.058
chromosome	1417320	T→G	F13V (TTT→GTT)	slr2060 →	NON	ORF_ID:slr2060; unknown protein	NO	NO	YES																									0.079
chromosome	1417347	T→G	L22V (TTA→GTA)	slr2060 →	NON	ORF_ID:slr2060; unknown protein	NO	YES	YES														0.06				0.078							0.053
chromosome	1421538	T→A	I200N (ATC→AAC)	slr2062 →	NON	transposase	NO	NO	YES																								0.06
chromosome	1427050	A→C	L201R (CTA→CGA)	sll1951 ←	NON	hemolysin	NO	NO	YES																						0.064
chromosome	1438340	C→A	T323N (ACC→AAC)	thl →	NON	acetyl coenzyme A acetyltransferase (thiolase)	YES	YES	NO														0.071
chromosome	1449671	A→C	T538P (ACG→CCG)	slr2002 →	NON	ORF_ID:slr2002; unknown protein	NO	YES	YES				0.057												0.063							0.057
chromosome	1451658	T→G	E287D (GAA→GAC)	sll1902 ←	NON	ORF_ID:sll1902; hypothetical protein	NO	NO	YES																								0.089
chromosome	1482024	T→A	S47C (AGT→TGT)	mntA ←	NON	Mn transporter; MntA	YES	NO	YES																									0.075
chromosome	1489195	A→C	Y118S (TAT→TCT)	slr1727 →	NON	eukaryotic Na+/H+ exchanger	NO	YES	NO												0.069	0.065
chromosome	1489197	T→G	W119G (TGG→GGG)	slr1727 →	NON	eukaryotic Na+/H+ exchanger	NO	NO	YES																						0.059
chromosome	1513955	G→C	S244T (AGT→ACT)	slr0265 →	NON	transposase	NO	YES	NO				0.07
chromosome	1514391	G→T	S316R (AGC→AGA)	dfp ←	NON	pantothenate metabolism flavoprotein	YES	YES	NO										0.117
chromosome	1519410	A→C	K99N (AAA→AAC)	slr0267 →	NON	ORF_ID:slr0267; hypothetical protein	NO	NO	YES																				0.056
chromosome	1519435	G→T	V108F (GTT→TTT)	slr0267 →	NON	ORF_ID:slr0267; hypothetical protein	NO	YES	NO														0.067
chromosome	1520192	T→G	Q303H (CAA→CAC)	sll0245 ←	NON	ORF_ID:sll0245; hypothetical protein	NO	YES	YES				0.06								0.061										0.064
chromosome	1559508	A→T	L35Q (CTA→CAA)	trxA ←	NON	thiol:disulfide interchange protein; TrxA	YES	YES	NO												0.056
chromosome	1570385	A→C	E59D (GAA→GAC)	ftsY →	NON	cell division protein; FtsY	YES	YES	YES					0.066						0.053	0.075								0.063
chromosome	1570415	T→G	D69E (GAT→GAG)	ftsY →	NON	cell division protein; FtsY	YES	YES	YES				0.076															0.05
chromosome	1591662	T→G	F389L (TTT→TTG)	slr1506 →	NON	ORF_ID:slr1506; unknown protein	NO	NO	YES																								0.074
chromosome	1594769	A→T	K217N (AAA→AAT)	slr1508 →	NON	ORF_ID:slr1508; unknown protein	NO	NO	YES																								0.058
chromosome	1594775	G→T	W219C (TGG→TGT)	slr1508 →	NON	ORF_ID:slr1508; unknown protein	NO	NO	YES																										0.069
chromosome	1595795	G→T	A171S (GCC→TCC)	ntpJ →	NON	Na+ ‑ATPase subunit J	YES	YES	NO														0.064
chromosome	1603727	C→A	A145S (GCC→TCC)	sll1414 ←	NON	ORF_ID:sll1414; hypothetical protein	NO	YES	NO								0.054
chromosome	1611274	T→G	V183G (GTT→GGT)	hglK →	NON	HglK	YES	YES	YES								0.079														0.053
chromosome	1611385	T→A	L220Q (CTG→CAG)	hglK →	NON	HglK	YES	YES	NO											0.076
chromosome	1634322	A→C	N301H (AAC→CAC)	slr2120 →	NON	ORF_ID:slr2120; unknown protein	NO	YES	YES						0.057																					0.056
chromosome	1640058	G→C	E39Q (GAA→CAA)	slr2127 →	NON	ORF_ID:slr2127; unknown protein	NO	NO	YES																									0.051
chromosome	1656076	A→C	I12L (ATT→CTT)	spoT →	NON	(p)ppGpp 3'‑pyrophosphohydrolase	YES	NO	YES																						0.055
chromosome	1670607	A→T	M503L (ATG→TTG)	ymxG →	NON	processing protease	YES	NO	YES																				0.05
chromosome	1683763	T→A	Q166H (CAA→CAT)	sll1217 ←	NON	ORF_ID:sll1217; unknown protein	NO	NO	YES																							0.058
chromosome	1703520	T→A	K193M (AAG→ATG)	sll0809 ←	NON	ORF_ID:sll0809; unknown protein	NO	YES	YES												0.06								0.061		0.081
chromosome	1703572	G→T	Q176K (CAA→AAA)	sll0809 ←	NON	ORF_ID:sll0809; unknown protein	NO	YES	NO					0.066
chromosome	1709428	T→G	V66G (GTT→GGT)	slr0820 →	NON	glucosyltransferase	NO	YES	NO												0.092
chromosome	1764138	A→C	Y138S (TAT→TCT)	slr1962 →	NON	ORF_ID:slr1962; unknown protein	NO	YES	NO										0.069
chromosome	1771752	T→G	E164D (GAA→GAC)	hisF ←	NON	cyclase	YES	YES	YES									0.064									0.058	0.063		0.054
chromosome	1780485	T→G	M1R (ATG→AGG) †	slr1970 →	NON	ORF_ID:slr1970; unknown protein	NO	YES	YES					0.1																	0.106				0.097
chromosome	1796780	A→C	S229R (AGT→AGG)	sll1879 ←	NON	ORF_ID:sll1879; unknown protein	NO	YES	NO										0.086
chromosome	1796782	T→G	S229R (AGT→CGT)	sll1879 ←	NON	ORF_ID:sll1879; unknown protein	NO	YES	NO									0.07
chromosome	1832615	C→A	Q86K (CAA→AAA)	slr1474 →	NON	ORF_ID:slr1474; unknown protein	NO	YES	NO													0.065
chromosome	1854763	G→T	R221L (CGG→CTG)	rpoC1 →	NON	RNA polymerase gamma‑subunit	YES	NO	YES																		1
chromosome	1920020	C→A	V177F (GTC→TTC)	sll1095 ←	NON	ORF_ID:sll1095; hypothetical protein	NO	YES	NO											0.066
chromosome	1931782	T→G	L215R (CTG→CGG)	met3 →	NON	sulfate adenylyltransferase	YES	NO	YES																								0.054
chromosome	1938467	A→C	Q13H (CAA→CAC)	slr1170 →	NON	ORF_ID:slr1170; unknown protein	NO	NO	YES																	0.053
chromosome	1972406	A→C	I85L (ATC→CTC)	slr1683 →	NON	transposase	NO	NO	YES																								0.112
chromosome	1973978	A→C	L263R (CTA→CGA)	sll1559 ←	NON	soluble hydrogenase 42 kD subunit	NO	YES	YES														0.082				0.061
chromosome	1974032	A→T	I245N (ATC→AAC)	sll1559 ←	NON	soluble hydrogenase 42 kD subunit	NO	NO	YES																									0.07
chromosome	1999008	A→T	Q183H (CAA→CAT)	nadC →	NON	nicotinate‑nucleotide pyrophosphorylase	YES	YES	YES				1	1	1		1	1	1				1		1				1	1	1	1	1	1	1	1
chromosome	2000350	G→A	G292S (GGT→AGT)	slr0937 →	NON	ORF_ID:slr0937; unknown protein	NO	NO	YES																					1
chromosome	2013327	A→C	T183P (ACC→CCC)	slr0947 →	NON	OmpR subfamily	NO	NO	YES																					1	1	1
chromosome	2013361	A→G	D194G (GAC→GGC)	slr0947 →	NON	OmpR subfamily	NO	NO	YES																									1	1	1
chromosome	2035618	T→G	L49V (TTA→GTA)	slr1624 →	NON	ORF_ID:slr1624; unknown protein	NO	NO	YES																										0.071
chromosome	2037531	A→T	S333T (TCT→ACT)	bgl ←	NON	beta‑glucosidase	YES	YES	NO					0.055
chromosome	2039568	C→A	L10I (CTC→ATC)	slr1627 →	NON	ORF_ID:slr1627; hypothetical protein	NO	YES	NO													0.065
chromosome	2096417	A→C	W42G (TGG→GGG)	sll0419 ←	NON	ORF_ID:sll0419; unknown protein	NO	YES	NO													0.06
chromosome	2107485	T→G	L558W (TTG→TGG)	slr0280 →	NON	ORF_ID:slr0280; unknown protein	NO	NO	YES																	0.063
chromosome	2172175	G→T	D4186Y (GAT→TAT)	slr0408 →	NON	ORF_ID:slr0408; integrin alpha subunit domain homologue	NO	YES	NO														0.052
chromosome	2180739	T→G	L55V (TTG→GTG)	petF →	NON	ferredoxin	YES	YES	NO													0.059
chromosome	2185567	A→C	L73W (TTG→TGG)	sll0149 ←	NON	ORF_ID:sll0149; unknown protein	NO	NO	YES																								0.057
chromosome	2200947	T→G	N5H (AAC→CAC)	sll0142 ←	NON	cation or drug efflux system protein	NO	NO	YES																					0.057
chromosome	2258878	T→G	S269A (TCG→GCG)	slr0990 →	NON	ORF_ID:slr0990; unknown protein	NO	YES	NO						0.056
chromosome	2263848	T→G	L8V (TTA→GTA)	lipB →	NON	LipB protein	YES	YES	YES											0.094											0.088
chromosome	2280652	A→C	F99C (TTT→TGT)	ribC ←	NON	riboflavin synthase alpha chain	YES	YES	NO					0.054
chromosome	2284277	A→C	T162P (ACG→CCG)	xylR →	NON	xylose repressor	YES	YES	YES									0.062														0.066
chromosome	2297447	T→A	E375V (GAA→GTA)	sll0294 ←	NON	ORF_ID:sll0294; unknown protein	NO	NO	YES																		0.051
chromosome	2297457	C→A	A372S (GCC→TCC)	sll0294 ←	NON	ORF_ID:sll0294; unknown protein	NO	YES	NO				0.076
chromosome	2347854	C→A	L686F (TTG→TTT)	sll0350 ←	NON	ORF_ID:sll0350; unknown protein	NO	NO	YES																							0.087
chromosome	2350805	T→A	L145Q (CTG→CAG)	slr0363 →	NON	ORF_ID:slr0363; unknown protein	NO	NO	YES																					0.102
chromosome	2353159	C→A	Q613K (CAA→AAA)	slr0364 →	NON	ORF_ID:slr0364; unknown protein	NO	YES	NO									0.055
chromosome	2360056	A→C	N2912H (AAC→CAC)	slr0364 →	NON	ORF_ID:slr0364; unknown protein	NO	YES	YES												0.054													0.062
chromosome	2371584	A→T	L176H (CTC→CAC)	sphS ←	NON	regulation of the phosphate regulon	YES	YES	YES				0.075		0.085								0.15	0.141		0.092	0.077							0.079	0.134
chromosome	2371611	A→C	I167S (ATT→AGT)	sphS ←	NON	regulation of the phosphate regulon	YES	YES	NO															0.065
chromosome	2401150	A→C	Q79H (CAA→CAC)	secD →	NON	protein‑export membrane protein; SecD	YES	YES	YES				0.062																			0.065		0.094
chromosome	2404646	T→A	E108V (GAA→GTA)	rpl20 ←	NON	50S ribosomal protein L20	YES	NO	YES																		0.051								0.057
chromosome	2404650	T→A	S107C (AGT→TGT)	rpl20 ←	NON	50S ribosomal protein L20	YES	YES	NO															0.055
chromosome	2430134	C→A	Q198K (CAA→AAA)	rfbW →	NON	mannosyl transferase	YES	NO	YES																				0.079
chromosome	2497890	T→G	S55R (AGT→AGG)	recG →	NON	DNA recombinase	YES	YES	YES						0.063						0.068	0.07												0.056
chromosome	2498011	C→A	R96S (CGT→AGT)	recG →	NON	DNA recombinase	YES	YES	NO															0.06
chromosome	2498022	G→T	L99F (TTG→TTT)	recG →	NON	DNA recombinase	YES	YES	YES														0.058										0.067
chromosome	2502694	A→C	N395K (AAT→AAG)	ponA ←	NON	penicillin‑binding protein 1A	YES	YES	NO													0.055
chromosome	2507062	G→T	C311F (TGT→TTT)	slr0214 →	NON	cytosine‑specific methyltransferase	NO	YES	NO											0.06			0.09
chromosome	2510428	G→C	Q290E (CAA→GAA)	sll0209 ←	NON	ORF_ID:sll0209; hypothetical protein	NO	NO	YES																1
chromosome	2547012	T→G	K6Q (AAG→CAG)	sll0410 ←	NON	ORF_ID:sll0410; unknown protein	NO	YES	NO						0.076
chromosome	2551155	A→T	S135C (AGC→TGC)	ccmK →	NON	carbon dioxide concentrating mechanism protein; CcmK	YES	YES	NO													0.122
chromosome	2551174	T→G	L141R (CTA→CGA)	ccmK →	NON	carbon dioxide concentrating mechanism protein; CcmK	YES	NO	YES																								0.093
chromosome	2551178	G→T	L142F (TTG→TTT)	ccmK →	NON	carbon dioxide concentrating mechanism protein; CcmK	YES	YES	NO													0.067
chromosome	2594192	A→C	Q46H (CAA→CAC)	ribG →	NON	riboflavin biosynthesis protein	YES	YES	YES							0.085					0.118		0.062				0.096				0.107	0.112		0.12
chromosome	2636881	G→T	Q250K (CAA→AAA)	pstB ←	NON	phosphate transport ATP‑binding protein; PstB	YES	YES	NO						0.08								0.066
chromosome	2680983	A→T	I297N (ATC→AAC)	dgt ←	NON	dGTP triphosphohydrolase	YES	YES	NO													0.063
chromosome	2682603	T→G	E208D (GAA→GAC)	sll0396 ←	NON	OmpR subfamily	NO	NO	YES																					0.051
chromosome	2713053	G→T	L85I (CTT→ATT)	sll0371 ←	NON	ORF_ID:sll0371; unknown protein	NO	YES	NO											0.054	0.054
chromosome	2713071	G→T	P79T (CCA→ACA)	sll0371 ←	NON	ORF_ID:sll0371; unknown protein	NO	NO	YES																									0.06
chromosome	2713099	C→A	L69F (TTG→TTT)	sll0371 ←	NON	ORF_ID:sll0371; unknown protein	NO	YES	YES							0.078				0.067						0.067	0.075
chromosome	2714938	T→G	K584T (AAA→ACA)	carB ←	NON	carbamoyl‑phosphate synthase, pyrimidine‑specific, large chain	YES	YES	YES				0.061									0.05			0.05									0.083
chromosome	2721706	A→C	F177V (TTC→GTC)	sll0188 ←	NON	ORF_ID:sll0188; unknown protein	NO	YES	NO													0.059
chromosome	2733752	A→C	Q224H (CAA→CAC)	hdrB →	NON	heterodisulfide reductase subunit B	YES	NO	YES																		0.065
chromosome	2744040	T→A	I249N (ATT→AAT)	slr0207 →	NON	ORF_ID:slr0207; unknown protein	NO	YES	NO													0.054
chromosome	2747639	A→C	Q12H (CAA→CAC)	slr0210 →	NON	sensory transduction histidine kinase	NO	YES	NO					0.062					0.088
chromosome	2776594	T→G	H276Q (CAT→CAG)	slr0904 →	NON	ORF_ID:slr0904; hypothetical protein	NO	YES	NO												0.057
chromosome	2781745	G→T	D115Y (GAT→TAT)	slr0907 →	NON	ORF_ID:slr0907; unknown protein	NO	NO	YES																			0.087
chromosome	2781751	C→A	Q117K (CAA→AAA)	slr0907 →	NON	ORF_ID:slr0907; unknown protein	NO	YES	YES						0.062													0.134
chromosome	2868668	T→G	V251G (GTG→GGG)	slr0848 →	NON	ORF_ID:slr0848; hypothetical protein	NO	NO	YES																				0.075					0.082
chromosome	2888839	G→T	R399L (CGG→CTG)	deaD →	NON	ATP‑dependent RNA helicase; DeaD	YES	NO	YES																								1
chromosome	2909615	A→C	L63V (TTG→GTG)	sll0486 ←	NON	ORF_ID:sll0486; PCC7942 clock gene...ORFE	NO	YES	NO														0.087	0.057
chromosome	2911607	A→C	F85V (TTT→GTT)	sll0484 ←	NON	ABC transporter	NO	NO	YES																				0.073
chromosome	2927729	C→A	G658W (GGG→TGG)	sll0474 ←	NON	sensory transduction histidine kinase	NO	NO	YES																			0.053
chromosome	2942656	T→A	K76N (AAA→AAT)	sll0597 ←	NON	ORF_ID:sll0597; hypothetical protein	NO	YES	NO													0.061
chromosome	2987931	T→G	N227H (AAC→CAC)	sll0096 ←	NON	ORF_ID:sll0096; unknown protein	NO	NO	YES																							0.111
chromosome	2987934	G→T	Q226K (CAA→AAA)	sll0096 ←	NON	ORF_ID:sll0096; unknown protein	NO	NO	YES																									0.104
chromosome	2987971	T→G	Q213H (CAA→CAC)	sll0096 ←	NON	ORF_ID:sll0096; unknown protein	NO	NO	YES																			0.075
chromosome	2993968	T→G	I155S (ATT→AGT)	slr0112 →	NON	ORF_ID:slr0112; unknown protein	NO	YES	YES				0.062									0.064		0.056										0.067
chromosome	3003503	A→C	T180P (ACG→CCG)	slr0121 →	NON	ORF_ID:slr0121; unknown protein	NO	YES	YES								0.076																	0.056
chromosome	3003517	A→C	E184D (GAA→GAC)	slr0121 →	NON	ORF_ID:slr0121; unknown protein	NO	YES	YES													0.086					0.06			0.062			0.069	0.074		0.121
chromosome	3037493	G→C	V62L (GTT→CTT)	slr0315 →	NON	ORF_ID:slr0315; hypothetical protein	NO	NO	YES																	1		1
chromosome	3067121	G→T	A125S (GCC→TCC)	slr0800 →	NON	transposase	NO	YES	NO									0.071
chromosome	3074098	G→T	A214E (GCA→GAA)	sll0782 ←	NON	putative protein kinase	NO	YES	NO														0.054
chromosome	3101375	T→G	E64D (GAA→GAC)	sll0672 ←	NON	cation‑transporting ATPase; E1‑E2 ATPase	NO	NO	YES																						0.062	0.064
chromosome	3143947	C→A	G79W (GGG→TGG)	sll0044 ←	NON	ORF_ID:sll0044; unknown protein	NO	YES	NO						0.058
chromosome	3147633	T→G	Q263H (CAA→CAC)	sll0043 ←	NON	CheA like protein	NO	YES	NO														0.068
chromosome	3151491	T→G	M163L (ATG→CTG)	sll0041 ←	NON	tsr or; CheD	NO	YES	YES					0.052											0.05
chromosome	3154633	A→T	S10T (TCA→ACA)	sll0038 ←	NON	PatA subfamily	NO	NO	YES																						0.094
chromosome	3162779	C→A	A489S (GCC→TCC)	sll0033 ←	NON	ORF_ID:sll0033; unknown protein	NO	YES	NO													0.095
chromosome	3163025	T→G	I407L (ATC→CTC)	sll0033 ←	NON	ORF_ID:sll0033; unknown protein	NO	NO	YES																									0.05
chromosome	3174137	C→A	T268N (ACC→AAC)	nrtC →	NON	nitrate transport protein; NrtC	YES	YES	NO															0.058
chromosome	3181140	G→A	A133V (GCC→GTC)	sll0518 ←	NON	ORF_ID:sll0518; unknown protein	NO	YES	YES				1	1	1	1	1	1	1	1	1	1	1	1	1	1	1	1	1	1	1	1	1	1	1	1
chromosome	3185900	A→T	I390F (ATT→TTT)	murE →	NON	UDP‑MurNac‑tripeptide synthetase	YES	YES	NO													0.091
chromosome	3185906	A→T	I392L (ATA→TTA)	murE →	NON	UDP‑MurNac‑tripeptide synthetase	YES	NO	YES																										0.056
chromosome	3199322	A→C	I198L (ATC→CTC)	hemE →	NON	uroporphyrinogen decarboxylase	YES	YES	YES												0.064							0.051
chromosome	3204849	A→C	V268G (GTT→GGT)	sll0505 ←	NON	ORF_ID:sll0505; hypothetical protein	NO	NO	YES																									0.05
chromosome	3238625	G→T	Q82K (CAA→AAA)	sll0896 ←	NON	Holliday juction resolvase; RuvC	NO	NO	YES																							0.084
chromosome	3240255	A→C	E25D (GAA→GAC)	trpC →	NON	indole‑3‑glycerol phosphate synthase	YES	YES	NO							0.055
chromosome	3271508	A→C	Q353P (CAG→CCG)	pyrD →	NON	dihydroorotate dehydrogenase	YES	NO	YES																		0.146						0.103
chromosome	3283284	T→G	E41D (GAA→GAC)	sll1340 ←	NON	ORF_ID:sll1340; unknown protein	NO	YES	YES													0.054		0.063	0.052
chromosome	3286904	C→G	E89Q (GAA→CAA)	sll1336 ←	NON	ORF_ID:sll1336; hypothetical protein	NO	YES	YES				0.087		0.084						0.061	0.117		0.101			0.096		0.1				0.051
chromosome	3298825	C→A	P167Q (CCA→CAA)	sbpA →	NON	sulfate binding protein; SbpA	YES	NO	YES																	0.06
chromosome	3306427	G→T	P783T (CCA→ACA)	sll1366 ←	NON	helicase of the snf2/rad54 family	NO	NO	YES																											0.055
chromosome	3306444	G→T	T777N (ACC→AAC)	sll1366 ←	NON	helicase of the snf2/rad54 family	NO	NO	YES																				0.062
chromosome	3306453	G→T	T774N (ACC→AAC)	sll1366 ←	NON	helicase of the snf2/rad54 family	NO	YES	YES								0.07																0.075
chromosome	3319419	T→G	L47V (TTG→GTG)	hisA →	NON	phosphorybosilformimino‑5‑amino‑phosphorybosil‑ 4‑imidazolecarboxamideisomerase	YES	NO	YES																				0.087
chromosome	3323561	G→T	R96L (CGT→CTT)	rpoDI →	NON	RNA polymerase sigma factor	YES	YES	YES				1	1	1	1	1	1	1	1	1	1	1	1	1	1	1	1	1	1	1	1	1	1	1	1
chromosome	3353444	G→T	L83F (TTG→TTT)	slr0668 →	NON	ORF_ID:slr0668; unknown protein	NO	NO	YES																							0.054
chromosome	3355884	C→A	L993F (TTG→TTT)	gltB ←	NON	ferredoxin‑dependent glutamate synthase	YES	YES	YES													0.054				0.068									0.077
chromosome	3380463	A→C	M112L (ATG→CTG)	slr1570 →	NON	ORF_ID:slr1570; unknown protein	NO	YES	NO				0.066								0.076
chromosome	3421017	G→C	R201P (CGA→CCA)	eno →	NON	enolase	YES	YES	NO											0.051
chromosome	3440941	G→T	L302I (CTT→ATT)	sll0723 ←	NON	ORF_ID:sll0723; unknown protein	NO	YES	NO													0.05
chromosome	3441553	C→A	D98Y (GAT→TAT)	sll0723 ←	NON	ORF_ID:sll0723; unknown protein	NO	NO	YES																									0.058
chromosome	3450391	G→T	G155V (GGA→GTA)	hlyB →	NON	haemolysin secretion ATP‑binding protein	YES	NO	YES																		0.065					0.053
chromosome	3491003	G→T	L167I (CTA→ATA)	sll0445 ←	NON	ORF_ID:sll0445; unknown protein	NO	NO	YES																										0.051
chromosome	3521007	T→G	T230P (ACG→CCG)	prfA ←	NON	peptide chain release factor	YES	YES	NO												0.054
chromosome	3534417	C→G	L192V (CTG→GTG)	argG →	NON	argininosuccinate synthetase	YES	NO	YES																0.311
chromosome	3534864	G→A	V341M (GTG→ATG)	argG →	NON	argininosuccinate synthetase	YES	NO	YES																0.11
chromosome	3558729	A→C	S417R (AGC→CGC)	slr0599 →	NON	eukaryotic protein kinase	NO	NO	YES																										0.061
chromosome	3565442	A→T	D202V (GAC→GTC)	lepA →	NON	LepA gene product	YES	NO	YES																								0.052

## Sheet: mutation_count
	FL-ALE	FL0	FL+	FL0_1	FL0_2	FL0_3	FL0_4	FL0_5	FL0_6	FL0_7	FL0_8	FL0_9	FL0_10	FL0_11	FL0_12	FL+_13	FL+_14	FL+_15	FL+_16	FL+_17	FL+_18	FL+_19	FL+_20	FL+_21	FL+_22	FL+_23	FL+_24
TOTAL	412	234	269	34	31	37	19	22	22	26	31	38	51	40	23	20	22	51	29	37	31	39	41	51	57	33	24
NC	63	33	46	6	10	6	4	5	7	6	8	6	9	5	5	6	5	8	5	9	7	8	8	16	10	5	7
COD	349	201	223	28	21	31	15	17	15	20	23	32	42	35	18	14	17	43	24	28	24	31	33	35	47	28	17
INDEL	7	3	5	1	0	0	1	1	0	1	0	0	0	1	1	2	0	1	0	1	1	0	0	0	0	1	0
SNP	342	198	218	26	21	31	14	16	15	19	23	32	42	34	17	12	17	42	24	27	23	31	33	35	47	26	17
STOP	10	5	6	0	1	1	0	0	0	0	0	1	0	1	1	0	0	1	0	1	1	0	1	1	0	1	0
SYN	55	36	30	3	3	7	4	4	2	4	3	5	5	5	2	1	0	11	1	2	3	6	5	5	6	5	1
NON	277	157	182	23	17	23	10	12	13	15	20	26	37	28	14	11	17	30	23	24	19	25	27	29	41	20	16
NON-known	89	53	56	7	5	6	5	3	5	4	8	10	12	10	7	5	6	11	8	9	6	10	10	9	11	8	5
NON-unknown	188	104	126	16	12	17	5	9	8	11	12	16	25	18	7	6	11	19	15	15	13	15	17	20	30	12	11

## Sheet: 101 fully segregated
position	mutation	annotation	locus	mut type	function	in FL0	in FL+	WT	LT_initial	LT_final	FL0_1	FL0_2	FL0_3	FL0_4	FL0_5	FL0_6	FL0_7	FL0_8	FL0_9	FL0_10	FL0_11	FL0_12	FL+_13	FL+_14	FL+_15	FL+_16	FL+_17	FL+_18	FL+_19	FL+_20	FL+_21	FL+_22	FL+_23	FL+_24	F=1?	Total F
82357	2 bp→TG	coding (62‑63/219 nt)	ssr6089 →	INDEL	ORF_ID:ssr6089	YES	YES	1	1	1	1	1	1	1	1	1	1	1	1	1	1	1	1	1	1	1	1	1	1	1	1	1	1	1	YES	27
82405	A→G	N37S (AAC→AGC)	ssr6089 →	NON	ORF_ID:ssr6089	YES	YES	1	1	1	1	1	1	1	1	1	1	1	1	1	1	1	1	1	1	1	1	1	1	1	1	1	1	1	YES	27
943495	G→A	V604I (GTC→ATC)	psaA →	NON	P700 apoprotein subunit Ia	YES	YES	1	1	1	1	1	1	1	1	1	1	1	1	1	1	1	1	1	1	1	1	1	1	1	1	1	1	1	YES	27
1012958	G→T	intergenic (‑70/+87)	repA ← / ← ftsZ	NC	rare lipoprotein A/cell division FtsZ protein	YES	YES	1	1	1	1	1	1	1	1	1	1	1	1	1	1	1	1	1	1	1	1	1	1	1	1	1	1	1	YES	27
1364187	A→G	L116L (TTG→CTG)	pyrF ←	SYN	orotidine 5' monophosphate decarboxylase	YES	YES	1	1	1	1	1	1	1	1	1	1	1	1	1	1	1	1	1	1	1	1	1	1	1	1	1	1	1	YES	27
2092571	A→T	L313* (TTA→TAA)	sll0422 ←	STOP	asparaginase	YES	YES	1	1	1	1	1	1	1	1	1	1	1	1	1	1	1	1	1	1	1	1	1	1	1	1	1	1	1	YES	27
2198893	T→C	L689L (TTA→TTG)	sll0142 ←	SYN	cation or drug efflux system protein	YES	YES	1	1	1	1	1	1	1	1	1	1	1	1	1	1	1	1	1	1	1	1	1	1	1	1	1	1	1	YES	27
2204584	(G)9→8	coding (428/498 nt)	gspF →	INDEL	general secretion pathway protein F	YES	YES	1	1	1	1	1	1	1	1	1	1	1	1	1	1	1	1	1	1	1	1	1	1	1	1	1	1	1	YES	27
2409244	Δ1 bp	coding (301/351 nt)	sll0762 ←	INDEL	ORF_ID:sll0762; unknown protein	YES	YES	1	1	1	1	1	1	1	1	1	1	1	1	1	1	1	1	1	1	1	1	1	1	1	1	1	1	1	YES	27
2419399	Δ1 bp	coding (496/510 nt)	ycf22 ←	INDEL	ORF_ID:sll0751; hypothetical protein	YES	YES	1	1	1	1	1	1	1	1	1	1	1	1	1	1	1	1	1	1	1	1	1	1	1	1	1	1	1	YES	27
2602717	C→A	H82Q (CAC→CAA)	slr0468 →	NON	ORF_ID:slr0468; unknown protein	YES	YES	1	1	1	1	1	1	1	1	1	1	1	1	1	1	1	1	1	1	1	1	1	1	1	1	1	1	1	YES	27
2602734	T→A	I88N (ATT→AAT)	slr0468 →	NON	ORF_ID:slr0468; unknown protein	YES	YES	1	1	1	1	1	1	1	1	1	1	1	1	1	1	1	1	1	1	1	1	1	1	1	1	1	1	1	YES	27
2748897	C→T	intergenic (+40/‑49)	slr0210 → / → ssr0332	NC	sensory transduction histidine kinase/ORF_ID:ssr0332; unknown protein	YES	YES	1	1	1	1	1	1	1	1	1	1	1	1	1	1	1	1	1	1	1	1	1	1	1	1	1	1	1	YES	27
3096187	T→C	I47T (ATA→ACA)	ssr1175 →	NON	transposase	YES	YES	1	1	1	1	1	1	1	1	1	1	1	1	1	1	1	1	1	1	1	1	1	1	1	1	1	1	1	YES	27
3110189	G→A	intergenic (‑37/+27)	sll0666 ← / ← sll0665	NC	transposase/transposase	YES	YES	1	1	1	1	1	1	1	1	1	1	1	1	1	1	1	1	1	1	1	1	1	1	1	1	1	1	1	YES	27
3110343	G→T	P73Q (CCA→CAA)	sll0665 ←	NON	transposase	YES	YES	1	1	1	1	1	1	1	1	1	1	1	1	1	1	1	1	1	1	1	1	1	1	1	1	1	1	1	YES	27
3142651	A→G	L75L (CTT→CTC)	sps ←	SYN	sucrose phosphate synthase	YES	YES	1	1	1	1	1	1	1	1	1	1	1	1	1	1	1	1	1	1	1	1	1	1	1	1	1	1	1	YES	27
3260096	(C)7→6	intergenic (‑209/+41)	sll0529 ← / ← sll0528	NC	ORF_ID:sll0529; unknown protein/ORF_ID:sll0528; hypothetical protein	YES	YES	1	1	1	1	1	1	1	1	1	1	1	1	1	1	1	1	1	1	1	1	1	1	1	1	1	1	1	YES	27
2,350,285:1	+A	intergenic (‑29/‑87)	psbI ← / → slr0363	NC	photosystem II PsbI protein/ORF_ID:slr0363; unknown protein	YES	YES	1	1	1	1	1	1	1	1	1	1	1	1	1	1	1	1	1	1	1	1	1	1	1	1	1	1	1	YES	27
2,360,246:1	+C	coding (8924/9090 nt)	slr0364 →	INDEL	ORF_ID:slr0364; unknown protein	YES	YES	1	1	1	1	1	1	1	1	1	1	1	1	1	1	1	1	1	1	1	1	1	1	1	1	1	1	1	YES	27
2,544,044:1	+C	coding (280/300 nt)	ssl0787 ←	INDEL	ORF_ID:ssl0787; unknown protein	YES	YES	1	1	1	1	1	1	1	1	1	1	1	1	1	1	1	1	1	1	1	1	1	1	1	1	1	1	1	YES	27
152654	Δ1 bp	coding (397/897 nt)	sll0224 ←	INDEL	ORF_ID:sll0224; hypothetical protein	YES	YES		1	1	1	1	1	1	1	1	1	1	1	1	1	1	1	1	1	1	1	1	1	1	1	1	1	1	YES	26
489030	G→A	G582S (GGC→AGC)	slr1609 →	NON	long‑chain‑fatty‑acid CoA ligase	YES	YES		1	1	1	1	1	1	1	1	1	1	1	1	1	1	1	1	1	1	1	1	1	1	1	1	1	1	YES	26
842060	C→T	R185Q (CGG→CAG)	rpl3 ←	NON	50S ribosomal protein L3	YES	YES		1	1	1	1	1	1	1	1	1	1	1	1	1	1	1	1	1	1	1	1	1	1	1	1	1	1	YES	26
907462	G→A	W164* (TGG→TAG)	slr2070 →	STOP	ORF_ID:slr2070; unknown protein	YES	YES		1	1	1	1	1	1	1	1	1	1	1	1	1	1	1	1	1	1	1	1	1	1	1	1	1	1	YES	26
1426703	Δ1 bp	coding (949/5226 nt)	sll1951 ←	INDEL	hemolysin	YES	YES		1	1	1	1	1	1	1	1	1	1	1	1	1	1	1	1	1	1	1	1	1	1	1	1	1	1	YES	26
1536261	ISY203 (+) +9 bp	coding (1525‑1533/1677 nt)	sll0236 ←	INDEL	ORF_ID:sll0236; unknown protein	YES	YES		1	1	1	1	1	1	1	1	1	1	1	1	1	1	1	1	1	1	1	1	1	1	1	1	1	1	YES	26
2579902	Δ10 bp	coding (225‑234/828 nt)	sll0064 ←	INDEL	ORF_ID:sll0064; unknown protein	YES	YES		1	1	1	1	1	1	1	1	1	1	1	1	1	1	1	1	1	1	1	1	1	1	1	1	1	1	YES	26
2635009	C→A	G70V (GGG→GTG)	sll0687 ←	NON	ORF_ID:sll0687; hypothetical protein	YES	YES		1	1	1	1	1	1	1	1	1	1	1	1	1	1	1	1	1	1	1	1	1	1	1	1	1	1	YES	26
2780446	G→T	D313Y (GAT→TAT)	psbB →	NON	photosystem II CP47 protein	YES	YES		1	1	1	1	1	1	1	1	1	1	1	1	1	1	1	1	1	1	1	1	1	1	1	1	1	1	YES	26
2852832	G→A	A171A (GCC→GCT)	sll0827 ←	SYN	ORF_ID:sll0827; unknown protein	YES	YES		1	1	1	1	1	1	1	1	1	1	1	1	1	1	1	1	1	1	1	1	1	1	1	1	1	1	YES	26
3506907	C→A	P890T (CCA→ACA)	slr0454 →	NON	cation or drug efflux system protein	YES	YES		1	1	1	1	1	1	1	1	1	1	1	1	1	1	1	1	1	1	1	1	1	1	1	1	1	1	YES	26
2399608	C→T	G337S (GGC→AGC)	glcP ←	NON	glucose transport protein	YES	YES			1	1	1	1	1	1	1	1	1	1	1	1	1	1	1	1	1	1	1	1	1	1	1	1	1	YES	25
72086	Δ150 bp	intergenic (+2318/+643)	slr7076 → / ← sll7077	NC	ORF_ID:slr7076; hypothetical protein/ORF_ID:sll7077; hypothetical protein	YES	YES				1	1	1	1	1	1	1	1	1	1	1	1	1	1	1	1	1	1	1	1	1	1	1	1	YES	24
335959	T→C	S113G (AGC→GGC)	sll0933 ←	NON	ORF_ID:sll0933; unknown protein	YES	YES				1	1	1	1	1	1	1	1	1	1	1	1	1	1	1	1	1	1	1	1	1	1	1	1	YES	24
3181140	G→A	A133V (GCC→GTC)	sll0518 ←	NON	ORF_ID:sll0518; unknown protein	YES	YES				1	1	1	1	1	1	1	1	1	1	1	1	1	1	1	1	1	1	1	1	1	1	1	1	YES	24
3323561	G→T	R96L (CGT→CTT)	rpoDI →	NON	RNA polymerase sigma factor	YES	YES				1	1	1	1	1	1	1	1	1	1	1	1	1	1	1	1	1	1	1	1	1	1	1	1	YES	24
68609	Δ77 bp	intergenic (‑633/‑694)	sll7075 ← / → slr7076	NC	unknown protein/ORF_ID:slr7076; hypothetical protein	YES	YES				1	1	1	1	1	1	1	1	1	1	1	1	1	1	1	1	1	1	1	1	1	1		1	YES	23
70740	Δ77 bp	intergenic (+972/+2062)	slr7076 → / ← sll7077	NC	ORF_ID:slr7076; hypothetical protein/ORF_ID:sll7077; hypothetical protein	YES	YES				1	1	1	1	1	1	1	1	1	1	1	1	1	1		1	1	1	1	1	1	1	1	1	YES	23
1999008	A→T	Q183H (CAA→CAT)	nadC →	NON	nicotinate‑nucleotide pyrophosphorylase	YES	YES				1	1	1		1	1	1				1		1				1	1	1	1	1	1	1	1	YES	16
17222	Δ935 bp	Δ935 bp	ssr7018–[ssl7019]	INDEL	ssr7018, [ssl7019]	YES	YES							1	1		1				1		1										1		YES	6
3400332	Δ1,183 bp	Δ1,183 bp	[sll1475]–[sll1473]	INDEL	[sll1475], sll1474, [sll1473]	YES	YES	1		1									1				1										1		YES	5
589750	T→C	A841A (GCT→GCC)	slr2046 →	SYN	Fat protein	NO	YES																					1	1	1					YES	3
858495	G→T	T791N (ACC→AAC)	rpoB ←	NON	RNA polymerase beta subunit	NO	YES																									1	1	1	YES	3
1415635	A→G	T504A (ACC→GCC)	topA →	NON	DNA topoisomerase I	NO	YES																					1	1	1					YES	3
2013327	A→C	T183P (ACC→CCC)	slr0947 →	NON	OmpR subfamily	NO	YES																					1	1	1					YES	3
2013361	A→G	D194G (GAC→GGC)	slr0947 →	NON	OmpR subfamily	NO	YES																									1	1	1	YES	3
2301721	A→G	K403E (AAG→GAG)	slr0168 →	NON	ORF_ID:slr0168; unknown protein	NO	NO	1	1	1																									YES	3
117277	Δ1,183 bp	Δ1,183 bp	[sll5130]–[sll5132]	INDEL	[sll5130], sll5131, [sll5132]	NO	NO	1		1																									YES	2
125267	T→C	T393A (ACC→GCC)	dfr ←	NON	drug sensory protein A	NO	YES																	1		1									YES	2
530947	A→T	W97R (TGG→AGG)	sll1647 ←	NON	ORF_ID:sll1647; hypothetical protein	NO	YES																	1		1									YES	2
727349	A→G	S40P (TCT→CCT)	cpcB ←	NON	phycocyanin b subunit	NO	YES																						1	1					YES	2
1414572	A→T	E149D (GAA→GAT)	topA →	NON	DNA topoisomerase I	NO	YES																	1		1									YES	2
1972593	A→G	intergenic (+44/‑16)	slr1683 → / → slr1684	NC	transposase/transposase	NO	YES																	1		1									YES	2
3037493	G→C	V62L (GTT→CTT)	slr0315 →	NON	ORF_ID:slr0315; hypothetical protein	NO	YES																	1		1									YES	2
3282	C→T	intergenic (+229/‑223)	slr6001 → / → ssr6002	NC	two‑component hybrid sensor and regulator/ORF_ID:ssr6002	YES	NO				1																								YES	1
6306	A→G	intergenic (‑22/‑43)	sll7009 ← / → slr7010	NC	unknown protein/unknown protein	NO	YES																1												YES	1
11123	C→T	L865F (CTT→TTT)	slr7011 →	NON	unknown protein	NO	NO	1																											YES	1
24257	3 bp→AAA	intergenic (‑147/‑4)	ssl6023 ← / → ssr6024	NC	ORF_ID:ssl6023/ORF_ID:ssr6024	NO	NO	1																											YES	1
24261	2 bp→TT	intergenic (‑151/‑1)	ssl6023 ← / → ssr6024	NC	ORF_ID:ssl6023/ORF_ID:ssr6024	NO	NO	1																											YES	1
24268	T→C	T2T (ACT→ACC)	ssr6024 →	SYN	ORF_ID:ssr6024	NO	NO	1																											YES	1
24280	C→A	A6A (GCC→GCA)	ssr6024 →	SYN	ORF_ID:ssr6024	NO	NO	1																											YES	1
24317	A→G	K19E (AAA→GAA)	ssr6024 →	NON	ORF_ID:ssr6024	NO	NO	1																											YES	1
39206	G→C	G71G (GGG→GGC)	slr5040 →	SYN	transposase	NO	YES																								1				YES	1
68609	191 bp→41 bp	intergenic (‑633/‑580)	sll7075 ← / → slr7076	NC	unknown protein/ORF_ID:slr7076; hypothetical protein	NO	YES																										1		YES	1
70438	Δ75 bp	intergenic (+670/+2366)	slr7076 → / ← sll7077	NC	ORF_ID:slr7076; hypothetical protein/ORF_ID:sll7077; hypothetical protein	NO	YES																1												YES	1
124629	G→C	F605L (TTC→TTG)	dfr ←	NON	drug sensory protein A	NO	YES																		1										YES	1
442494	Δ13 bp	coding (331‑343/1770 nt)	ycf45 →	INDEL	ORF_ID:slr0692; hypothetical protein	NO	YES																				1								YES	1
443761	A→G	E533G (GAA→GGA)	ycf45 →	NON	ORF_ID:slr0692; hypothetical protein	NO	YES																					1							YES	1
489808	G→A	E29E (GAG→GAA)	slr1041 →	SYN	PatA subfamily	NO	NO	1																											YES	1
693714	C→T	V500M (GTG→ATG)	rnb ←	NON	ribonuclease II	NO	YES																				1								YES	1
695220	C→A	intergenic (‑9/+70)	rnb ← / ← sll1289	NC	ribonuclease II/ORF_ID:sll1289; unknown protein	YES	NO													1															YES	1
731368	Δ1 bp	coding (307/312 nt)	sll1574 ←	INDEL	ORF_ID:sll1574; unknown protein	NO	NO	1																											YES	1
831647	C→T	intergenic (‑89/+55)	infA ← / ← adk	NC	initiation factor IF‑1/adenylate kinase	NO	NO	1																											YES	1
832302	C→A	intergenic (‑37/+89)	adk ← / ← secY	NC	adenylate kinase/preprotein translocase SecY subunit	NO	YES																1												YES	1
937328	Δ3 bp	coding (947‑949/1509 nt)	ndhD3 ←	INDEL	NADH dehydrogenase subunit 4	NO	NO	1																											YES	1
1102843	G→T	P406T (CCC→ACC)	pykF ←	NON	pyruvate kinase	NO	NO			1																									YES	1
1204616	G→A	C114Y (TGT→TAT)	slr1865 →	NON	ORF_ID:slr1865; unknown protein	NO	NO	1																											YES	1
1329229	A→G	noncoding (8/74 nt)	trnD‑GUC ←	NC	trnD‑GUC	NO	YES																								1				YES	1
1413986	ISY100 (–) +2 bp	intergenic (+320/‑139)	apqZ → / → topA	NC	water channel protein/DNA topoisomerase I	YES	NO											1																	YES	1
1432903	Δ4 bp	intergenic (‑5/+70)	prmA ← / ← serA	NC	ribosomal protein L11 methyltransferase; PrmA/phosphoglycerate dehydrogenase	NO	YES																								1				YES	1
1812419	C→T	A225V (GCG→GTG)	slr1983 →	NON	regulatory components of sensory transduction system	NO	NO	1																											YES	1
1854763	G→T	R221L (CGG→CTG)	rpoC1 →	NON	RNA polymerase gamma‑subunit	NO	YES																		1										YES	1
1919875	A→G	intergenic (‑59/+38)	rps12 ← / ← sll1095	NC	30S ribosomal protein S12/ORF_ID:sll1095; hypothetical protein	NO	YES																								1				YES	1
1949361	ISY203 (–) +9 bp	intergenic (‑537/‑244)	otsA ← / → slr1670	NC	alpha,alpha‑trehalose‑phosphate synthase/ORF_ID:slr1670; unknown protein	NO	NO	1																											YES	1
2000350	G→A	G292S (GGT→AGT)	slr0937 →	NON	ORF_ID:slr0937; unknown protein	NO	YES																					1							YES	1
2010042	ISY523 (–) +3 bp	intergenic (‑38/‑174)	sll0914 ← / → slr0944	NC	ORF_ID:sll0914; unknown protein/ORF_ID:slr0944; hypothetical protein	NO	YES																									1			YES	1
2453422	T→G	noncoding (254/1489 nt)	rrn16Sa ←	NC	16S ribosomal RNA	YES	NO															1													YES	1
2453429	T→C	noncoding (247/1489 nt)	rrn16Sa ←	NC	16S ribosomal RNA	YES	NO															1													YES	1
2453433	A→T	noncoding (243/1489 nt)	rrn16Sa ←	NC	16S ribosomal RNA	YES	NO															1													YES	1
2510428	G→C	Q290E (CAA→GAA)	sll0209 ←	NON	ORF_ID:sll0209; hypothetical protein	NO	YES																1												YES	1
2513931	G→A	P42P (CCG→CCA)	glyS →	SYN	glycyl‑tRNA synthetase beta chain	NO	NO			1																									YES	1
2521013	T→C	F898S (TTT→TCT)	slr0222 →	NON	hybrid sensory kinase	NO	NO	1																											YES	1
2888839	G→T	R399L (CGG→CTG)	deaD →	NON	ATP‑dependent RNA helicase; DeaD	NO	YES																								1				YES	1
3014665	T→C	T92T (ACT→ACC)	slr0302 →	SYN	ORF_ID:slr0302; PleD gene product homologue	NO	NO	1																											YES	1
3098707	T→C	C95R (TGT→CGT)	ssr1176 →	NON	transposase	NO	NO	1																											YES	1
3362629	Δ8 bp	coding (573‑580/1110 nt)	slr1557 →	INDEL	ORF_ID:slr1557; unknown protein	NO	YES																		1										YES	1
3400025	C→A	R109L (CGG→CTG)	sll1475 ←	NON	sensory transduction histidine kinase	NO	NO	1																											YES	1
1,423,340:1	+A	coding (4312/5226 nt)	sll1951 ←	INDEL	hemolysin	NO	NO	1																											YES	1
2,736,517:1	+T	coding (1275/1986 nt)	sll0182 ←	INDEL	ABC transporter	NO	NO	1																											YES	1
442,222:1	+T	coding (59/1770 nt)	ycf45 →	INDEL	ORF_ID:slr0692; hypothetical protein	NO	YES																1												YES	1

## Sheet: 44 novel fully segregated
genomic entity	position	mutation	annotation	locus	mut type	function	GO terms	in FL0	in FL+	WT	LT_initial	LT_final	FL0_1	FL0_2	FL0_3	FL0_4	FL0_5	FL0_6	FL0_7	FL0_8	FL0_9	FL0_10	FL0_11	FL0_12	FL+_13	FL+_14	FL+_15	FL+_16	FL+_17	FL+_18	FL+_19	FL+_20	FL+_21	FL+_22	FL+_23	FL+_24	F=1?	total F
chromosome	3323561	G→T	R96L (CGT→CTT)	rpoDI →	NON	RNA polymerase sigma factor	Tc	YES	YES				1	1	1	1	1	1	1	1	1	1	1	1	1	1	1	1	1	1	1	1	1	1	1	1	YES	24
chromosome	3181140	G→A	A133V (GCC→GTC)	sll0518 ←	NON	ORF_ID:sll0518; unknown protein	?	YES	YES				1	1	1	1	1	1	1	1	1	1	1	1	1	1	1	1	1	1	1	1	1	1	1	1	YES	24
chromosome	335959	T→C	S113G (AGC→GGC)	pam68 (sll0933) ←	NON	ORF_ID:sll0933; unknown protein	P	YES	YES				1	1	1	1	1	1	1	1	1	1	1	1	1	1	1	1	1	1	1	1	1	1	1	1	YES	24
pSYSA	72086	Δ150 bp	intergenic (+2318/+643)	slr7076 → / ← sll7077	NC	ORF_ID:slr7076; hypothetical protein/ORF_ID:sll7077; hypothetical protein	?	YES	YES				1	1	1	1	1	1	1	1	1	1	1	1	1	1	1	1	1	1	1	1	1	1	1	1	YES	24
pSYSA	68609	Δ77 bp	intergenic (‑633/‑694)	sll7075 ← / → slr7076	NC	unknown protein/ORF_ID:slr7076; hypothetical protein	?	YES	YES				1	1	1	1	1	1	1	1	1	1	1	1	1	1	1	1	1	1	1	1	1	1		1	YES	23
pSYSA	70740	Δ77 bp	intergenic (+972/+2062)	slr7076 → / ← sll7077	NC	ORF_ID:slr7076; hypothetical protein/ORF_ID:sll7077; hypothetical protein	?	YES	YES				1	1	1	1	1	1	1	1	1	1	1	1	1	1		1	1	1	1	1	1	1	1	1	YES	23
chromosome	1999008	A→T	Q183H (CAA→CAT)	nadC →	NON	nicotinate‑nucleotide pyrophosphorylase	M	YES	YES				1	1	1		1	1	1				1		1				1	1	1	1	1	1	1	1	YES	16
pSYSA	17222	Δ935 bp	Δ935 bp	ssr7018–[ssl7019]	INDEL	ssr7018, [ssl7019]	?	YES	YES							1	1		1				1		1										1		YES	6
chromosome	858495	G→T	T791N (ACC→AAC)	rpoB ←	NON	RNA polymerase beta subunit	Tc	NO	YES																									1	1	1	YES	3
chromosome	2013327	A→C	T183P (ACC→CCC)	rpaB (slr0947) →	NON	OmpR subfamily	Tc	NO	YES																					1	1	1					YES	3
chromosome	2013361	A→G	D194G (GAC→GGC)	rpaB (slr0947) →	NON	OmpR subfamily	Tc	NO	YES																									1	1	1	YES	3
chromosome	589750	T→C	A841A (GCT→GCC)	slr2046 →	SYN	Fat protein	M	NO	YES																					1	1	1					YES	3
chromosome	1415635	A→G	T504A (ACC→GCC)	topA →	NON	DNA topoisomerase I	Tc	NO	YES																					1	1	1					YES	3
chromosome	727349	A→G	S40P (TCT→CCT)	cpcB ←	NON	phycocyanin b subunit	P	NO	YES																						1	1					YES	2
chromosome	125267	T→C	T393A (ACC→GCC)	dfr ←	NON	drug sensory protein A	M	NO	YES																	1		1									YES	2
chromosome	530947	A→T	W97R (TGG→AGG)	sll1647 ←	NON	ORF_ID:sll1647; hypothetical protein	?	NO	YES																	1		1									YES	2
chromosome	3037493	G→C	V62L (GTT→CTT)	slr0315 →	NON	ORF_ID:slr0315; hypothetical protein	?	NO	YES																	1		1									YES	2
chromosome	1972593	A→G	intergenic (+44/‑16)	slr1683 → / → slr1684	NC	transposase/transposase	Tp	NO	YES																	1		1									YES	2
chromosome	1414572	A→T	E149D (GAA→GAT)	topA →	NON	DNA topoisomerase I	Tc	NO	YES																	1		1									YES	2
chromosome	832302	C→A	intergenic (‑37/+89)	adk ← / ← secY	NC	adenylate kinase/preprotein translocase SecY subunit	Tp	NO	YES																1												YES	1
chromosome	1413986	ISY100 (–) +2 bp	intergenic (+320/‑139)	apqZ → / → topA	NC	water channel protein/DNA topoisomerase I	M	YES	NO											1																	YES	1
chromosome	2888839	G→T	R399L (CGG→CTG)	deaD →	NON	ATP‑dependent RNA helicase; DeaD	Tc	NO	YES																								1				YES	1
chromosome	124629	G→C	F605L (TTC→TTG)	dfr ←	NON	drug sensory protein A	M	NO	YES																		1										YES	1
chromosome	1432903	Δ4 bp	intergenic (‑5/+70)	prmA ← / ← serA	NC	ribosomal protein L11 methyltransferase; PrmA/phosphoglycerate dehydrogenase	Tl	NO	YES																								1				YES	1
chromosome	693714	C→T	V500M (GTG→ATG)	rnb ←	NON	ribonuclease II	Tc	NO	YES																				1								YES	1
chromosome	695220	C→A	intergenic (‑9/+70)	rnb ← / ← sll1289	NC	ribonuclease II/ORF_ID:sll1289; unknown protein	Tc	YES	NO													1															YES	1
chromosome	1854763	G→T	R221L (CGG→CTG)	rpoC1 →	NON	RNA polymerase gamma‑subunit	Tc	NO	YES																		1										YES	1
chromosome	1919875	A→G	intergenic (‑59/+38)	rps12 ← / ← sll1095	NC	30S ribosomal protein S12/ORF_ID:sll1095; hypothetical protein	Tl	NO	YES																								1				YES	1
chromosome	2453422	T→G	noncoding (254/1489 nt)	rrn16Sa ←	NC	16S ribosomal RNA	Tl	YES	NO															1													YES	1
chromosome	2453429	T→C	noncoding (247/1489 nt)	rrn16Sa ←	NC	16S ribosomal RNA	Tl	YES	NO															1													YES	1
chromosome	2453433	A→T	noncoding (243/1489 nt)	rrn16Sa ←	NC	16S ribosomal RNA	Tl	YES	NO															1													YES	1
chromosome	2510428	G→C	Q290E (CAA→GAA)	sll0209 ←	NON	ORF_ID:sll0209; hypothetical protein	?	NO	YES																1												YES	1
chromosome	2010042	ISY523 (–) +3 bp	intergenic (‑38/‑174)	sll0914 ← / → slr0944	NC	ORF_ID:sll0914; unknown protein/ORF_ID:slr0944; hypothetical protein	?	NO	YES																									1			YES	1
pSYSA	6306	A→G	intergenic (‑22/‑43)	sll7009 ← / → slr7010	NC	unknown protein/unknown protein	?	NO	YES																1												YES	1
pSYSA	68609	191 bp→41 bp	intergenic (‑633/‑580)	sll7075 ← / → slr7076	NC	unknown protein/ORF_ID:slr7076; hypothetical protein	?	NO	YES																										1		YES	1
chromosome	2000350	G→A	G292S (GGT→AGT)	slr0937 →	NON	ORF_ID:slr0937; unknown protein	?	NO	YES																					1							YES	1
chromosome	3362629	Δ8 bp	coding (573‑580/1110 nt)	slr1557 →	INDEL	ORF_ID:slr1557; unknown protein	?	NO	YES																		1										YES	1
pSYSM	39206	G→C	G71G (GGG→GGC)	slr5040 →	SYN	transposase	Tp	NO	YES																								1				YES	1
pSYSX	3282	C→T	intergenic (+229/‑223)	slr6001 → / → ssr6002	NC	two‑component hybrid sensor and regulator/ORF_ID:ssr6002	Tp	YES	NO				1																								YES	1
pSYSA	70438	Δ75 bp	intergenic (+670/+2366)	slr7076 → / ← sll7077	NC	ORF_ID:slr7076; hypothetical protein/ORF_ID:sll7077; hypothetical protein	?	NO	YES																1												YES	1
chromosome	1329229	A→G	noncoding (8/74 nt)	trnD‑GUC ←	NC	trnD‑GUC	Tl	NO	YES																								1				YES	1
chromosome	442494	Δ13 bp	coding (331‑343/1770 nt)	ycf45 →	INDEL	ORF_ID:slr0692; hypothetical protein	?	NO	YES																				1								YES	1
chromosome	443761	A→G	E533G (GAA→GGA)	ycf45 →	NON	ORF_ID:slr0692; hypothetical protein	?	NO	YES																					1							YES	1
chromosome	442,222:1	+T	coding (59/1770 nt)	ycf45 →	INDEL	ORF_ID:slr0692; hypothetical protein	?	NO	YES																1												YES	1
