# Supplementary material
Source: Research Square preprint supplement (doi:10.21203/rs.3.rs-6305715/v1)
Supplement: Supplementary file 6 [file 866a14984b8f36265a3b2980.xlsx]

## Sheet: description
Supplemental Data 5. Original data from the characterisation of the effects of the Pam68 mutations.
Refers to Extended Data Figure 4 and Figure 4.
abbreviation	meaning
IQR	interquartile range
CBB	Coomassie Brilliant Blue
nd	no data
Q1	first quartile (exclusive)
Q3	third quartile (exclusive)
RGB	red, green, blue
SD	standard deviation

## Sheet: Ext_Fig_4B
Final OD730nm	FL0							LL12
	LT	ins933	oePam68	pam68_S113G					LT	ins933	oePam68	pam68_S113G
	0.153333	0.286667	0.336667	0.413333					0.39	0.301333	0.383	0.356
	0.213333	0.293333	0.323333	0.346667					0.349667	0.303333	0.361333	0.332667
	0.203333	0.186667	0.246667	0.356667					0.417667	0.398	0.407	0.368667
	0.203333	0.253333	0.386667	0.366667					0.427	0.340333	0.441667	0.410667
									0.432333	0.319	0.424333	0.434667
									0.392	0.435667	0.49	0.534333
Bonferroni & Holm p value:		LT	ins933	oePam68	pam68_S113G				LT	ins933	oePam68	pam68_S113G
*** p≤0.001	LT		0.128914	0.0052342	0.000463			LT		0.432011	1.79807	0.879706
** p≤0.01	ins933			0.130576	0.0096845			ins933			0.230528	0.406447
* p≤0.05	OE933				0.142818			pam68_S113G				1.41514
insignificant	pam68_S113G							Group superscript	a	a	a	a
	Group superscript	a	ab	bc	c			Average	0.401444	0.349611	0.417889	0.406167
	Average	0.193333	0.255	0.323333	0.370833			SD	0.0308917	0.0552133	0.045478	0.0729169
	SD	0.0270801	0.0488004	0.0579272	0.0294863			% to LT	1	0.870883	1.04096	1.01176
	% to LT	1	1.31897	1.67241	1.9181			Median	0.404833	0.329667	0.415667	0.389667
	Median	0.203333	0.27	0.33	0.361667			Q1	0.379917	0.302833	0.377583	0.350167
	Q1	0.203333	0.253333	0.323333	0.356667			Q3	0.429667	0.416833	0.465833	0.4845
	Q3	0.203333	0.286667	0.336667	0.366667			1.5×IQR	0.074625	0.171	0.132375	0.2015
	1.5×IQR	0	0.05	0.02	0.015

## Sheet: Ext_Fig_4C
	under FL0																		under LL12
genotype	LT				ins933				oePam68				pam68_S113G					genotype	LT						ins933						oePam68						pam68_S113G
replicate #	1	2	3	4	1	2	3	4	1	2	3	4	1	2	3	4		replicate #	1	2	3	4	5	6	1	2	3	4	5	6	1	2	3	4	5	6	1	2	3	4	5	6
time[h]																		time[h]
0	0.074	0.067	0.057	0.062	0.057	0.076	0.058	0.053	0.056	0.047	0.085	0.058	0.058	0.064	0.055	0.053		0	0.099	0.076	0.065	0.068	0.083	0.06	0.106	0.074	0.059	0.067	0.057	0.07	0.058	0.067	0.08	0.064	0.056	0.054	0.074	0.101	0.068	0.061	0.061	0.076
0.25	0.073	0.071	0.06	0.064	0.061	0.068	0.059	0.053	0.058	0.047	0.079	0.058	0.057	0.065	0.057	0.053		0.25	0.094	0.077	0.062	0.067	0.081	0.057	0.105	0.072	0.054	0.066	0.054	0.069	0.057	0.063	0.078	0.062	0.056	0.053	0.07	0.099	0.064	0.058	0.059	0.074
0.5	0.075	0.07	0.061	0.053	0.062	0.071	0.058	0.057	0.056	0.043	0.079	0.057	0.057	0.063	0.057	0.156		0.5	0.092	0.076	0.061	0.065	0.083	0.057	0.104	0.073	0.054	0.065	0.056	0.069	0.055	0.062	0.078	0.062	0.056	0.054	0.068	0.097	0.065	0.058	0.059	0.074
0.75	0.074	0.071	0.057	0.064	0.061	0.069	0.064	0.058	0.056	0.043	0.079	0.058	0.057	0.062	0.054	0.05		0.75	0.092	0.077	0.062	0.065	0.082	0.057	0.104	0.071	0.054	0.064	0.054	0.068	0.056	0.062	0.079	0.062	0.055	0.053	0.069	0.098	0.066	0.058	0.058	0.074
1	0.073	0.07	0.059	0.063	0.063	0.074	0.066	0.057	0.056	0.043	0.079	0.057	0.056	0.061	0.054	0.049		1	0.092	0.076	0.06	0.065	0.081	0.057	0.105	0.071	0.051	0.063	0.056	0.067	0.056	0.062	0.078	0.061	0.056	0.053	0.068	0.097	0.064	0.057	0.06	0.073
1.25	0.072	0.07	0.06	0.063	0.064	0.074	0.067	0.059	0.056	0.043	0.078	0.058	0.056	0.052	0.054	0.05		1.25	0.093	0.076	0.06	0.064	0.081	0.058	0.105	0.072	0.052	0.063	0.055	0.068	0.056	0.063	0.078	0.06	0.056	0.052	0.068	0.097	0.063	0.058	0.059	0.073
1.5	0.073	0.071	0.058	0.064	0.064	0.074	0.066	0.061	0.057	0.043	0.079	0.056	0.057	0.053	0.053	0.051		1.5	0.093	0.076	0.061	0.065	0.08	0.057	0.104	0.07	0.054	0.064	0.055	0.066	0.056	0.063	0.078	0.062	0.055	0.054	0.068	0.097	0.065	0.058	0.06	0.074
1.75	0.071	0.073	0.06	0.064	0.066	0.074	0.067	0.061	0.056	0.043	0.078	0.057	0.056	0.053	0.054	0.05		1.75	0.093	0.077	0.061	0.065	0.081	0.057	0.105	0.073	0.053	0.064	0.056	0.068	0.056	0.062	0.079	0.062	0.054	0.053	0.067	0.096	0.064	0.058	0.06	0.074
2	0.07	0.071	0.059	0.064	0.064	0.074	0.065	0.061	0.056	0.042	0.078	0.056	0.054	0.053	0.054	0.051		2	0.093	0.077	0.062	0.066	0.081	0.058	0.105	0.072	0.052	0.065	0.056	0.066	0.056	0.064	0.08	0.063	0.056	0.053	0.068	0.098	0.065	0.058	0.061	0.074
2.25	0.068	0.073	0.059	0.064	0.066	0.074	0.065	0.06	0.056	0.043	0.079	0.056	0.054	0.052	0.053	0.049		2.25	0.094	0.078	0.061	0.065	0.08	0.057	0.105	0.073	0.054	0.065	0.054	0.068	0.057	0.064	0.079	0.062	0.057	0.053	0.068	0.097	0.065	0.058	0.06	0.074
2.5	0.067	0.07	0.059	0.064	0.062	0.074	0.064	0.061	0.054	0.042	0.079	0.056	0.052	0.051	0.053	0.05		2.5	0.093	0.078	0.061	0.066	0.081	0.058	0.105	0.072	0.054	0.065	0.055	0.068	0.056	0.063	0.079	0.063	0.056	0.054	0.068	0.097	0.065	0.058	0.06	0.074
2.75	0.065	0.072	0.06	0.065	0.065	0.076	0.065	0.061	0.054	0.042	0.078	0.056	0.051	0.051	0.054	0.05		2.75	0.094	0.078	0.06	0.066	0.082	0.059	0.108	0.072	0.052	0.067	0.057	0.07	0.057	0.065	0.08	0.064	0.057	0.054	0.069	0.098	0.065	0.058	0.061	0.075
3	0.065	0.073	0.06	0.065	0.067	0.074	0.065	0.062	0.054	0.041	0.079	0.054	0.051	0.053	0.055	0.051		3	0.093	0.079	0.063	0.066	0.082	0.059	0.106	0.072	0.053	0.066	0.057	0.07	0.057	0.063	0.08	0.064	0.057	0.055	0.069	0.097	0.066	0.058	0.061	0.076
3.25	0.064	0.074	0.06	0.065	0.066	0.077	0.066	0.063	0.054	0.04	0.078	0.052	0.05	0.052	0.055	0.051		3.25	0.094	0.079	0.06	0.065	0.081	0.058	0.107	0.073	0.051	0.065	0.056	0.068	0.058	0.065	0.079	0.062	0.056	0.054	0.069	0.099	0.063	0.057	0.061	0.075
3.5	0.064	0.072	0.06	0.066	0.065	0.076	0.066	0.063	0.055	0.041	0.079	0.053	0.049	0.052	0.055	0.051		3.5	0.094	0.078	0.062	0.066	0.082	0.058	0.107	0.073	0.053	0.067	0.058	0.069	0.058	0.064	0.079	0.063	0.058	0.055	0.069	0.098	0.065	0.059	0.06	0.076
3.75	0.063	0.076	0.061	0.065	0.068	0.076	0.066	0.06	0.053	0.041	0.079	0.054	0.048	0.052	0.055	0.05		3.75	0.094	0.078	0.061	0.067	0.082	0.059	0.106	0.073	0.053	0.067	0.058	0.069	0.058	0.065	0.08	0.063	0.056	0.054	0.069	0.097	0.064	0.058	0.06	0.075
4	0.066	0.075	0.061	0.065	0.07	0.076	0.067	0.061	0.052	0.04	0.079	0.055	0.051	0.051	0.056	0.05		4	0.092	0.078	0.062	0.067	0.08	0.057	0.107	0.071	0.054	0.067	0.057	0.067	0.057	0.062	0.08	0.063	0.058	0.053	0.066	0.096	0.065	0.058	0.06	0.074
4.25	0.065	0.074	0.06	0.066	0.067	0.077	0.066	0.064	0.055	0.042	0.078	0.053	0.051	0.053	0.057	0.051		4.25	0.092	0.078	0.063	0.066	0.08	0.057	0.105	0.072	0.052	0.066	0.056	0.067	0.057	0.063	0.08	0.064	0.056	0.054	0.065	0.096	0.066	0.059	0.058	0.075
4.5	0.065	0.075	0.061	0.067	0.069	0.075	0.066	0.063	0.055	0.042	0.079	0.055	0.051	0.053	0.055	0.052		4.5	0.092	0.078	0.061	0.066	0.081	0.058	0.106	0.072	0.051	0.066	0.057	0.068	0.057	0.064	0.08	0.065	0.057	0.054	0.066	0.095	0.065	0.057	0.06	0.075
4.75	0.067	0.075	0.062	0.066	0.07	0.076	0.067	0.062	0.054	0.042	0.078	0.057	0.051	0.052	0.056	0.05		4.75	0.092	0.078	0.061	0.066	0.082	0.059	0.106	0.071	0.052	0.066	0.058	0.069	0.058	0.064	0.081	0.064	0.057	0.055	0.066	0.096	0.065	0.058	0.06	0.077
5	0.067	0.071	0.062	0.065	0.067	0.076	0.065	0.063	0.055	0.043	0.079	0.056	0.052	0.052	0.056	0.051		5	0.092	0.078	0.063	0.068	0.082	0.058	0.107	0.073	0.053	0.066	0.057	0.069	0.057	0.065	0.081	0.065	0.057	0.055	0.066	0.095	0.067	0.059	0.061	0.076
5.25	0.069	0.073	0.061	0.066	0.07	0.077	0.066	0.063	0.057	0.043	0.079	0.056	0.053	0.053	0.056	0.053		5.25	0.094	0.078	0.064	0.068	0.082	0.058	0.106	0.074	0.055	0.069	0.057	0.069	0.057	0.063	0.082	0.065	0.058	0.056	0.067	0.097	0.067	0.06	0.062	0.077
5.5	0.069	0.074	0.062	0.067	0.07	0.076	0.067	0.063	0.056	0.043	0.079	0.055	0.053	0.053	0.057	0.052		5.5	0.096	0.079	0.063	0.069	0.084	0.06	0.108	0.074	0.055	0.069	0.06	0.07	0.059	0.065	0.082	0.064	0.058	0.057	0.069	0.1	0.066	0.06	0.063	0.079
5.75	0.07	0.076	0.064	0.067	0.07	0.076	0.067	0.064	0.055	0.043	0.078	0.056	0.054	0.053	0.057	0.051		5.75	0.095	0.08	0.064	0.069	0.084	0.061	0.108	0.075	0.054	0.069	0.058	0.072	0.059	0.066	0.083	0.066	0.059	0.058	0.069	0.099	0.067	0.06	0.063	0.079
6	0.071	0.074	0.064	0.068	0.07	0.078	0.067	0.064	0.057	0.043	0.079	0.057	0.054	0.054	0.059	0.052		6	0.095	0.082	0.064	0.069	0.084	0.061	0.108	0.074	0.055	0.07	0.059	0.071	0.059	0.065	0.083	0.067	0.059	0.057	0.069	0.1	0.068	0.061	0.063	0.079
6.25	0.069	0.072	0.063	0.068	0.07	0.078	0.065	0.066	0.056	0.043	0.079	0.057	0.053	0.054	0.056	0.053		6.25	0.098	0.082	0.064	0.068	0.086	0.061	0.11	0.075	0.055	0.069	0.06	0.071	0.06	0.067	0.083	0.065	0.059	0.058	0.071	0.102	0.068	0.06	0.063	0.08
6.5	0.073	0.074	0.064	0.068	0.071	0.078	0.067	0.065	0.056	0.044	0.078	0.056	0.055	0.055	0.058	0.053		6.5	0.096	0.081	0.063	0.069	0.086	0.063	0.108	0.077	0.055	0.069	0.059	0.074	0.06	0.069	0.083	0.067	0.06	0.059	0.071	0.101	0.067	0.061	0.063	0.081
6.75	0.074	0.074	0.064	0.068	0.07	0.078	0.067	0.065	0.057	0.045	0.079	0.056	0.056	0.055	0.059	0.052		6.75	0.098	0.082	0.066	0.069	0.086	0.062	0.112	0.076	0.056	0.07	0.061	0.074	0.061	0.069	0.083	0.066	0.06	0.058	0.072	0.103	0.067	0.061	0.064	0.08
7	0.073	0.078	0.066	0.069	0.074	0.078	0.069	0.065	0.056	0.045	0.08	0.057	0.056	0.056	0.058	0.054		7	0.099	0.083	0.067	0.071	0.086	0.062	0.111	0.078	0.058	0.071	0.06	0.073	0.062	0.069	0.083	0.068	0.061	0.058	0.073	0.104	0.068	0.061	0.065	0.081
7.25	0.073	0.075	0.065	0.069	0.072	0.079	0.068	0.065	0.056	0.045	0.079	0.055	0.055	0.054	0.058	0.054		7.25	0.1	0.083	0.066	0.071	0.085	0.063	0.11	0.076	0.057	0.069	0.06	0.073	0.062	0.07	0.083	0.067	0.06	0.06	0.073	0.107	0.068	0.061	0.065	0.081
7.5	0.074	0.076	0.065	0.07	0.074	0.08	0.068	0.068	0.057	0.046	0.08	0.056	0.056	0.056	0.059	0.055		7.5	0.099	0.083	0.067	0.071	0.088	0.063	0.111	0.076	0.057	0.071	0.062	0.075	0.062	0.071	0.085	0.069	0.062	0.06	0.074	0.105	0.07	0.062	0.065	0.082
7.75	0.075	0.076	0.065	0.069	0.072	0.081	0.068	0.066	0.057	0.045	0.079	0.056	0.056	0.055	0.059	0.054		7.75	0.098	0.084	0.068	0.072	0.086	0.063	0.111	0.077	0.059	0.072	0.063	0.074	0.062	0.07	0.085	0.069	0.061	0.059	0.073	0.104	0.07	0.062	0.066	0.083
8	0.076	0.078	0.067	0.07	0.075	0.08	0.069	0.068	0.058	0.047	0.08	0.057	0.058	0.057	0.06	0.054		8	0.1	0.084	0.065	0.071	0.088	0.064	0.112	0.079	0.055	0.071	0.062	0.075	0.062	0.07	0.086	0.067	0.062	0.061	0.074	0.105	0.069	0.061	0.065	0.082
8.25	0.075	0.076	0.065	0.07	0.074	0.08	0.069	0.066	0.057	0.046	0.08	0.057	0.057	0.056	0.06	0.054		8.25	0.1	0.085	0.067	0.071	0.087	0.062	0.113	0.078	0.058	0.071	0.061	0.074	0.064	0.071	0.086	0.069	0.062	0.06	0.075	0.106	0.07	0.061	0.066	0.082
8.5	0.078	0.079	0.067	0.072	0.076	0.08	0.071	0.067	0.058	0.045	0.079	0.058	0.059	0.056	0.062	0.055		8.5	0.101	0.085	0.066	0.071	0.089	0.064	0.113	0.077	0.057	0.072	0.062	0.075	0.062	0.072	0.086	0.07	0.062	0.061	0.075	0.107	0.069	0.062	0.066	0.085
8.75	0.075	0.079	0.068	0.071	0.077	0.081	0.072	0.068	0.059	0.047	0.079	0.058	0.057	0.058	0.062	0.055		8.75	0.1	0.084	0.068	0.072	0.089	0.064	0.116	0.079	0.058	0.071	0.063	0.075	0.064	0.072	0.086	0.069	0.064	0.061	0.074	0.106	0.07	0.063	0.068	0.084
9	0.078	0.079	0.067	0.07	0.076	0.081	0.071	0.066	0.058	0.046	0.081	0.059	0.059	0.056	0.062	0.055		9	0.099	0.085	0.068	0.072	0.087	0.062	0.113	0.079	0.058	0.071	0.062	0.074	0.064	0.071	0.085	0.069	0.062	0.06	0.074	0.105	0.071	0.063	0.065	0.083
9.25	0.079	0.077	0.066	0.072	0.076	0.081	0.07	0.067	0.059	0.046	0.081	0.057	0.059	0.057	0.061	0.056		9.25	0.097	0.082	0.068	0.072	0.084	0.062	0.112	0.077	0.059	0.072	0.061	0.073	0.062	0.07	0.087	0.069	0.061	0.059	0.072	0.104	0.07	0.063	0.066	0.082
9.5	0.079	0.08	0.069	0.072	0.08	0.082	0.071	0.068	0.058	0.047	0.08	0.058	0.06	0.058	0.063	0.055		9.5	0.097	0.083	0.068	0.072	0.085	0.062	0.112	0.077	0.058	0.072	0.061	0.074	0.062	0.071	0.086	0.07	0.061	0.06	0.072	0.104	0.071	0.063	0.065	0.082
9.75	0.077	0.08	0.068	0.072	0.079	0.082	0.072	0.069	0.059	0.048	0.081	0.058	0.058	0.058	0.062	0.055		9.75	0.096	0.083	0.068	0.072	0.084	0.063	0.111	0.076	0.057	0.073	0.06	0.073	0.061	0.07	0.087	0.071	0.061	0.06	0.07	0.101	0.072	0.063	0.064	0.083
10	0.08	0.081	0.069	0.073	0.08	0.083	0.072	0.07	0.06	0.048	0.081	0.058	0.06	0.059	0.063	0.058		10	0.097	0.083	0.066	0.071	0.084	0.063	0.112	0.078	0.055	0.071	0.061	0.073	0.062	0.071	0.086	0.069	0.061	0.06	0.071	0.103	0.07	0.062	0.065	0.081
10.25	0.079	0.082	0.069	0.074	0.079	0.082	0.072	0.07	0.059	0.048	0.08	0.058	0.06	0.059	0.065	0.057		10.25	0.098	0.083	0.065	0.072	0.086	0.062	0.111	0.077	0.056	0.07	0.062	0.075	0.062	0.07	0.086	0.069	0.062	0.06	0.071	0.102	0.069	0.062	0.066	0.084
10.5	0.081	0.081	0.069	0.073	0.08	0.084	0.072	0.07	0.06	0.048	0.081	0.059	0.061	0.059	0.063	0.058		10.5	0.099	0.083	0.064	0.072	0.086	0.063	0.112	0.078	0.055	0.071	0.063	0.074	0.063	0.071	0.086	0.071	0.062	0.061	0.071	0.104	0.069	0.061	0.065	0.084
10.75	0.08	0.079	0.069	0.072	0.079	0.083	0.072	0.07	0.061	0.049	0.081	0.059	0.061	0.059	0.064	0.056		10.75	0.097	0.083	0.068	0.072	0.086	0.063	0.112	0.078	0.058	0.072	0.063	0.074	0.063	0.07	0.088	0.07	0.063	0.06	0.071	0.103	0.071	0.064	0.066	0.084
11	0.08	0.083	0.07	0.073	0.081	0.083	0.072	0.07	0.06	0.048	0.081	0.059	0.061	0.059	0.065	0.058		11	0.1	0.084	0.069	0.074	0.086	0.063	0.114	0.078	0.059	0.072	0.062	0.075	0.064	0.071	0.088	0.071	0.062	0.062	0.072	0.105	0.071	0.064	0.066	0.085
11.25	0.082	0.081	0.07	0.073	0.08	0.085	0.073	0.071	0.062	0.049	0.083	0.058	0.063	0.061	0.065	0.058		11.25	0.101	0.086	0.068	0.074	0.088	0.066	0.114	0.078	0.058	0.074	0.064	0.078	0.064	0.075	0.089	0.07	0.063	0.062	0.073	0.106	0.072	0.064	0.068	0.086
11.5	0.082	0.083	0.071	0.074	0.082	0.084	0.072	0.072	0.061	0.049	0.08	0.058	0.062	0.06	0.065	0.057		11.5	0.101	0.086	0.069	0.073	0.089	0.065	0.114	0.079	0.059	0.073	0.064	0.078	0.065	0.073	0.09	0.071	0.065	0.064	0.075	0.107	0.071	0.064	0.068	0.088
11.75	0.082	0.082	0.071	0.073	0.08	0.084	0.072	0.07	0.062	0.049	0.082	0.058	0.063	0.059	0.065	0.056		11.75	0.101	0.086	0.068	0.072	0.09	0.066	0.114	0.079	0.058	0.074	0.066	0.078	0.065	0.074	0.088	0.072	0.065	0.063	0.075	0.108	0.071	0.064	0.069	0.088
12	0.082	0.085	0.071	0.073	0.083	0.084	0.073	0.07	0.061	0.05	0.082	0.059	0.062	0.06	0.065	0.056		12	0.102	0.087	0.068	0.074	0.09	0.066	0.116	0.08	0.059	0.075	0.064	0.078	0.065	0.074	0.09	0.071	0.065	0.065	0.076	0.108	0.072	0.064	0.07	0.088
12.25	0.084	0.083	0.072	0.074	0.084	0.085	0.074	0.071	0.062	0.05	0.082	0.059	0.063	0.059	0.067	0.058		12.25	0.101	0.087	0.071	0.075	0.09	0.066	0.116	0.082	0.062	0.076	0.065	0.079	0.067	0.075	0.091	0.074	0.065	0.065	0.077	0.109	0.074	0.066	0.07	0.088
12.5	0.083	0.082	0.072	0.075	0.083	0.085	0.073	0.071	0.063	0.05	0.081	0.059	0.063	0.06	0.066	0.059		12.5	0.103	0.088	0.07	0.075	0.091	0.066	0.117	0.08	0.06	0.075	0.066	0.078	0.067	0.075	0.09	0.073	0.066	0.065	0.079	0.111	0.073	0.065	0.069	0.088
12.75	0.083	0.086	0.073	0.074	0.084	0.085	0.075	0.071	0.062	0.05	0.082	0.06	0.063	0.06	0.067	0.058		12.75	0.103	0.088	0.072	0.077	0.093	0.068	0.118	0.081	0.063	0.076	0.067	0.08	0.067	0.075	0.091	0.073	0.068	0.066	0.078	0.111	0.074	0.067	0.071	0.089
13	0.081	0.086	0.072	0.075	0.085	0.086	0.074	0.072	0.062	0.051	0.083	0.059	0.062	0.061	0.068	0.059		13	0.104	0.088	0.072	0.076	0.093	0.069	0.118	0.082	0.062	0.076	0.068	0.082	0.067	0.076	0.09	0.073	0.067	0.067	0.079	0.111	0.074	0.066	0.072	0.091
13.25	0.084	0.086	0.073	0.074	0.084	0.085	0.076	0.072	0.063	0.051	0.082	0.059	0.063	0.062	0.07	0.059		13.25	0.104	0.088	0.073	0.078	0.093	0.07	0.118	0.081	0.065	0.077	0.067	0.082	0.068	0.077	0.092	0.074	0.067	0.066	0.079	0.112	0.074	0.068	0.072	0.092
13.5	0.084	0.087	0.073	0.075	0.086	0.086	0.075	0.073	0.063	0.051	0.082	0.059	0.064	0.063	0.068	0.059		13.5	0.106	0.089	0.074	0.077	0.093	0.068	0.118	0.082	0.064	0.077	0.067	0.08	0.069	0.077	0.092	0.075	0.067	0.066	0.08	0.114	0.076	0.067	0.072	0.09
13.75	0.083	0.086	0.073	0.075	0.084	0.086	0.075	0.073	0.064	0.051	0.082	0.06	0.064	0.061	0.068	0.059		13.75	0.106	0.089	0.075	0.078	0.094	0.07	0.119	0.083	0.065	0.077	0.068	0.082	0.068	0.076	0.093	0.074	0.068	0.068	0.08	0.114	0.076	0.067	0.072	0.092
14	0.084	0.086	0.073	0.076	0.086	0.086	0.075	0.074	0.064	0.052	0.083	0.06	0.066	0.062	0.07	0.059		14	0.106	0.09	0.072	0.077	0.094	0.069	0.119	0.084	0.064	0.075	0.068	0.081	0.069	0.077	0.091	0.075	0.068	0.066	0.081	0.115	0.076	0.067	0.072	0.09
14.25	0.086	0.085	0.073	0.075	0.083	0.087	0.075	0.072	0.064	0.051	0.082	0.06	0.067	0.062	0.068	0.059		14.25	0.106	0.089	0.072	0.077	0.093	0.069	0.119	0.084	0.062	0.076	0.069	0.081	0.069	0.077	0.09	0.075	0.068	0.066	0.081	0.115	0.075	0.067	0.071	0.09
14.5	0.086	0.088	0.074	0.076	0.086	0.087	0.076	0.073	0.065	0.052	0.082	0.062	0.066	0.063	0.07	0.06		14.5	0.105	0.09	0.074	0.078	0.091	0.069	0.119	0.083	0.064	0.077	0.069	0.081	0.068	0.078	0.092	0.074	0.068	0.067	0.08	0.114	0.075	0.067	0.072	0.091
14.75	0.085	0.086	0.074	0.076	0.084	0.087	0.075	0.073	0.065	0.054	0.082	0.062	0.065	0.062	0.069	0.059		14.75	0.104	0.09	0.073	0.078	0.092	0.068	0.119	0.082	0.066	0.077	0.068	0.08	0.068	0.077	0.092	0.076	0.068	0.065	0.08	0.112	0.077	0.068	0.071	0.09
15	0.086	0.088	0.073	0.077	0.085	0.087	0.075	0.074	0.065	0.052	0.083	0.062	0.066	0.064	0.069	0.06		15	0.104	0.089	0.072	0.076	0.091	0.068	0.118	0.082	0.062	0.078	0.066	0.079	0.069	0.076	0.092	0.075	0.067	0.065	0.078	0.113	0.074	0.067	0.071	0.089
15.25	0.087	0.085	0.074	0.076	0.084	0.087	0.076	0.074	0.065	0.052	0.083	0.061	0.067	0.063	0.071	0.061		15.25	0.104	0.089	0.072	0.077	0.091	0.067	0.118	0.083	0.061	0.076	0.067	0.078	0.068	0.077	0.092	0.076	0.068	0.064	0.078	0.112	0.075	0.067	0.07	0.09
15.5	0.087	0.086	0.073	0.076	0.086	0.087	0.075	0.073	0.065	0.052	0.084	0.061	0.067	0.063	0.071	0.06		15.5	0.104	0.089	0.072	0.075	0.088	0.067	0.118	0.083	0.061	0.075	0.066	0.077	0.068	0.077	0.09	0.074	0.067	0.064	0.077	0.111	0.074	0.066	0.07	0.088
15.75	0.086	0.087	0.075	0.077	0.085	0.089	0.076	0.074	0.066	0.053	0.082	0.062	0.066	0.064	0.071	0.06		15.75	0.101	0.087	0.072	0.077	0.089	0.067	0.117	0.081	0.061	0.077	0.065	0.079	0.069	0.076	0.091	0.075	0.066	0.066	0.075	0.107	0.074	0.066	0.069	0.09
16	0.087	0.088	0.075	0.077	0.086	0.088	0.076	0.075	0.066	0.053	0.085	0.061	0.067	0.066	0.071	0.06		16	0.102	0.087	0.073	0.076	0.09	0.067	0.116	0.081	0.062	0.077	0.066	0.079	0.068	0.076	0.093	0.075	0.068	0.067	0.074	0.107	0.074	0.067	0.07	0.09
16.25	0.085	0.087	0.075	0.076	0.086	0.088	0.076	0.073	0.067	0.053	0.083	0.062	0.067	0.064	0.071	0.061		16.25	0.102	0.087	0.073	0.077	0.09	0.067	0.117	0.082	0.063	0.079	0.065	0.078	0.068	0.076	0.092	0.075	0.067	0.065	0.074	0.109	0.076	0.068	0.071	0.09
16.5	0.086	0.088	0.076	0.079	0.087	0.09	0.077	0.075	0.067	0.055	0.085	0.062	0.066	0.065	0.072	0.062		16.5	0.104	0.088	0.37	0.349	0.089	0.066	0.118	0.083	0.062	0.076	0.067	0.078	0.07	0.077	0.09	0.072	0.068	0.065	0.075	0.11	0.375	0.066	0.071	0.089
16.75	0.086	0.087	0.075	0.077	0.085	0.089	0.075	0.075	0.067	0.054	0.084	0.063	0.068	0.065	0.071	0.062		16.75	0.099	0.089	0.064	0.075	0.092	0.066	0.118	0.084	0.063	0.077	0.068	0.081	0.068	0.081	0.089	0.074	0.057	0.071	0.076	0.112	0.076	0.071	0.07	0.094
17	0.085	0.089	0.075	0.079	0.088	0.089	0.077	0.076	0.067	0.054	0.085	0.063	0.067	0.065	0.072	0.062		17	0.1	0.09	0.064	0.075	0.093	0.068	0.121	0.084	0.064	0.078	0.069	0.082	0.068	0.083	0.091	0.074	0.059	0.073	0.078	0.113	0.077	0.073	0.07	0.094
17.25	0.083	0.088	0.076	0.079	0.086	0.09	0.077	0.076	0.066	0.054	0.084	0.064	0.066	0.065	0.073	0.062		17.25	0.101	0.09	0.063	0.074	0.092	0.067	0.12	0.085	0.061	0.078	0.069	0.082	0.068	0.083	0.089	0.075	0.058	0.071	0.08	0.114	0.078	0.071	0.072	0.087
17.5	0.081	0.09	0.076	0.078	0.089	0.09	0.078	0.075	0.066	0.055	0.085	0.063	0.064	0.066	0.072	0.061		17.5	0.102	0.09	0.066	0.078	0.091	0.068	0.119	0.084	0.066	0.078	0.069	0.082	0.07	0.083	0.089	0.074	0.058	0.072	0.08	0.115	0.077	0.073	0.07	0.085
17.75	0.079	0.087	0.075	0.078	0.086	0.09	0.077	0.075	0.065	0.054	0.085	0.064	0.062	0.065	0.072	0.061		17.75	0.101	0.091	0.066	0.076	0.093	0.068	0.12	0.086	0.065	0.079	0.07	0.082	0.069	0.084	0.09	0.075	0.06	0.073	0.081	0.115	0.079	0.074	0.071	0.087
18	0.08	0.092	0.077	0.079	0.09	0.09	0.079	0.077	0.066	0.054	0.086	0.065	0.064	0.067	0.074	0.063		18	0.102	0.091	0.067	0.077	0.093	0.068	0.12	0.085	0.067	0.078	0.07	0.082	0.068	0.083	0.089	0.076	0.058	0.073	0.08	0.114	0.078	0.074	0.072	0.087
18.25	0.082	0.09	0.077	0.079	0.09	0.09	0.079	0.076	0.065	0.053	0.085	0.066	0.066	0.067	0.073	0.063		18.25	0.103	0.092	0.066	0.078	0.094	0.069	0.12	0.085	0.065	0.079	0.07	0.083	0.07	0.084	0.09	0.077	0.06	0.073	0.083	0.116	0.078	0.074	0.072	0.087
18.5	0.083	0.091	0.077	0.08	0.09	0.091	0.079	0.078	0.066	0.054	0.086	0.065	0.066	0.068	0.074	0.064		18.5	0.104	0.092	0.066	0.077	0.094	0.068	0.121	0.088	0.067	0.079	0.071	0.084	0.07	0.084	0.09	0.075	0.06	0.073	0.082	0.117	0.078	0.074	0.072	0.089
18.75	0.082	0.09	0.078	0.079	0.09	0.091	0.079	0.076	0.065	0.053	0.086	0.065	0.064	0.066	0.074	0.063		18.75	0.103	0.092	0.068	0.078	0.094	0.07	0.121	0.086	0.068	0.08	0.07	0.085	0.07	0.084	0.09	0.076	0.061	0.073	0.081	0.117	0.079	0.074	0.072	0.09
19	0.085	0.091	0.077	0.08	0.09	0.091	0.079	0.078	0.067	0.055	0.087	0.066	0.067	0.068	0.075	0.064		19	0.104	0.093	0.065	0.077	0.094	0.07	0.121	0.087	0.065	0.079	0.07	0.084	0.07	0.086	0.092	0.077	0.06	0.074	0.082	0.119	0.078	0.073	0.072	0.09
19.25	0.086	0.092	0.077	0.08	0.091	0.09	0.079	0.078	0.067	0.055	0.085	0.065	0.066	0.068	0.075	0.065		19.25	0.103	0.092	0.068	0.078	0.093	0.069	0.121	0.086	0.069	0.08	0.07	0.083	0.071	0.085	0.092	0.077	0.06	0.075	0.081	0.116	0.08	0.075	0.073	0.089
19.5	0.086	0.092	0.078	0.081	0.091	0.09	0.08	0.078	0.068	0.055	0.086	0.065	0.068	0.069	0.075	0.064		19.5	0.102	0.091	0.067	0.079	0.093	0.068	0.121	0.085	0.066	0.08	0.07	0.082	0.07	0.084	0.092	0.078	0.059	0.073	0.08	0.116	0.079	0.075	0.073	0.088
19.75	0.085	0.093	0.078	0.08	0.092	0.091	0.08	0.077	0.067	0.055	0.087	0.066	0.066	0.067	0.076	0.064		19.75	0.103	0.093	0.066	0.077	0.092	0.067	0.121	0.086	0.063	0.078	0.07	0.083	0.07	0.085	0.09	0.077	0.06	0.074	0.081	0.115	0.076	0.073	0.071	0.088
20	0.087	0.09	0.077	0.082	0.089	0.091	0.079	0.079	0.068	0.055	0.086	0.066	0.07	0.069	0.074	0.065		20	0.101	0.091	0.066	0.077	0.091	0.068	0.121	0.086	0.065	0.079	0.07	0.082	0.07	0.085	0.091	0.077	0.06	0.074	0.078	0.114	0.077	0.074	0.07	0.088
20.25	0.087	0.091	0.077	0.082	0.09	0.092	0.079	0.079	0.068	0.056	0.087	0.067	0.068	0.068	0.075	0.065		20.25	0.099	0.091	0.067	0.078	0.09	0.068	0.119	0.085	0.065	0.078	0.068	0.083	0.069	0.083	0.09	0.078	0.06	0.074	0.077	0.111	0.077	0.074	0.071	0.089
20.5	0.089	0.093	0.078	0.081	0.093	0.091	0.08	0.079	0.068	0.055	0.088	0.066	0.07	0.069	0.076	0.065		20.5	0.1	0.091	0.066	0.077	0.09	0.068	0.121	0.086	0.064	0.08	0.068	0.083	0.069	0.083	0.09	0.076	0.059	0.073	0.078	0.113	0.078	0.073	0.072	0.09
20.75	0.089	0.091	0.078	0.082	0.091	0.092	0.08	0.079	0.069	0.058	0.087	0.067	0.071	0.07	0.076	0.066		20.75	0.101	0.09	0.067	0.076	0.089	0.066	0.12	0.085	0.064	0.079	0.069	0.081	0.069	0.084	0.092	0.077	0.059	0.072	0.077	0.112	0.077	0.074	0.07	0.087
21	0.091	0.092	0.079	0.081	0.092	0.093	0.081	0.079	0.069	0.057	0.088	0.068	0.071	0.07	0.076	0.066		21	0.1	0.091	0.064	0.076	0.089	0.066	0.12	0.086	0.064	0.079	0.067	0.082	0.068	0.085	0.093	0.073	0.068	0.072	0.076	0.111	0.077	0.076	0.07	0.089
21.25	0.09	0.093	0.08	0.083	0.093	0.092	0.08	0.08	0.07	0.058	0.087	0.067	0.072	0.071	0.077	0.067		21.25	0.099	0.09	0.065	0.077	0.09	0.066	0.119	0.085	0.063	0.078	0.07	0.082	0.068	0.084	0.093	0.074	0.069	0.075	0.075	0.112	0.076	0.075	0.07	0.09
21.5	0.09	0.093	0.079	0.082	0.093	0.092	0.08	0.079	0.07	0.059	0.088	0.067	0.072	0.07	0.077	0.067		21.5	0.099	0.09	0.064	0.076	0.09	0.068	0.119	0.085	0.063	0.078	0.069	0.082	0.068	0.084	0.092	0.073	0.067	0.073	0.075	0.111	0.076	0.076	0.071	0.09
21.75	0.091	0.091	0.078	0.081	0.092	0.093	0.08	0.078	0.07	0.059	0.087	0.068	0.073	0.068	0.077	0.065		21.75	0.1	0.092	0.066	0.078	0.092	0.068	0.12	0.085	0.063	0.079	0.069	0.083	0.069	0.084	0.093	0.074	0.069	0.075	0.077	0.111	0.078	0.076	0.073	0.092
22	0.091	0.094	0.079	0.082	0.094	0.092	0.081	0.08	0.071	0.058	0.088	0.068	0.072	0.07	0.077	0.067		22	0.1	0.091	0.067	0.077	0.092	0.069	0.12	0.087	0.063	0.08	0.071	0.083	0.069	0.083	0.093	0.073	0.071	0.075	0.075	0.112	0.077	0.077	0.072	0.092
22.25	0.092	0.092	0.079	0.082	0.092	0.094	0.081	0.079	0.07	0.059	0.089	0.069	0.074	0.069	0.078	0.066		22.25	0.101	0.091	0.066	0.078	0.092	0.069	0.12	0.085	0.064	0.079	0.072	0.084	0.071	0.086	0.094	0.075	0.071	0.077	0.077	0.113	0.077	0.077	0.072	0.092
22.5	0.091	0.095	0.079	0.082	0.094	0.093	0.081	0.078	0.071	0.059	0.09	0.069	0.074	0.071	0.078	0.066		22.5	0.104	0.093	0.067	0.078	0.092	0.069	0.123	0.088	0.065	0.079	0.072	0.085	0.072	0.087	0.094	0.075	0.07	0.076	0.08	0.116	0.078	0.077	0.073	0.093
22.75	0.091	0.091	0.079	0.081	0.093	0.094	0.082	0.079	0.071	0.06	0.088	0.069	0.074	0.071	0.078	0.066		22.75	0.103	0.094	0.068	0.08	0.093	0.07	0.123	0.089	0.065	0.079	0.071	0.086	0.072	0.087	0.095	0.076	0.071	0.078	0.081	0.118	0.079	0.078	0.074	0.094
23	0.092	0.095	0.081	0.083	0.096	0.094	0.083	0.08	0.072	0.06	0.09	0.069	0.074	0.071	0.079	0.067		23	0.104	0.094	0.069	0.081	0.095	0.07	0.123	0.088	0.069	0.081	0.073	0.086	0.073	0.088	0.095	0.076	0.071	0.077	0.081	0.116	0.08	0.08	0.074	0.096
23.25	0.09	0.092	0.079	0.082	0.093	0.095	0.08	0.079	0.073	0.059	0.089	0.069	0.074	0.071	0.079	0.067		23.25	0.106	0.094	0.071	0.081	0.095	0.071	0.123	0.088	0.069	0.082	0.074	0.086	0.073	0.087	0.097	0.076	0.073	0.078	0.083	0.118	0.081	0.082	0.075	0.096
23.5	0.091	0.095	0.08	0.083	0.095	0.094	0.083	0.081	0.072	0.061	0.09	0.071	0.074	0.071	0.079	0.068		23.5	0.107	0.096	0.073	0.082	0.096	0.071	0.124	0.089	0.07	0.083	0.074	0.088	0.073	0.089	0.096	0.076	0.074	0.079	0.083	0.118	0.08	0.081	0.075	0.096
23.75	0.09	0.095	0.081	0.083	0.097	0.095	0.083	0.081	0.072	0.06	0.091	0.071	0.073	0.072	0.08	0.067		23.75	0.107	0.097	0.071	0.082	0.098	0.073	0.125	0.09	0.069	0.082	0.075	0.088	0.074	0.09	0.096	0.077	0.071	0.079	0.085	0.12	0.081	0.081	0.076	0.097
24	0.09	0.096	0.081	0.084	0.098	0.095	0.083	0.081	0.072	0.059	0.091	0.071	0.075	0.072	0.08	0.068		24	0.108	0.096	0.07	0.082	0.098	0.074	0.126	0.09	0.068	0.082	0.076	0.089	0.075	0.09	0.097	0.078	0.073	0.081	0.085	0.122	0.08	0.081	0.076	0.098
24.25	0.088	0.095	0.081	0.083	0.094	0.095	0.082	0.081	0.073	0.06	0.091	0.071	0.073	0.072	0.079	0.069		24.25	0.108	0.098	0.071	0.082	0.095	0.072	0.126	0.091	0.069	0.084	0.075	0.09	0.075	0.09	0.097	0.077	0.072	0.079	0.086	0.122	0.081	0.082	0.076	0.098
24.5	0.088	0.096	0.082	0.083	0.097	0.096	0.083	0.082	0.073	0.06	0.092	0.071	0.074	0.073	0.08	0.069		24.5	0.109	0.098	0.071	0.082	0.097	0.072	0.128	0.09	0.07	0.085	0.074	0.088	0.075	0.091	0.097	0.078	0.074	0.081	0.087	0.122	0.081	0.084	0.076	0.097
24.75	0.085	0.097	0.083	0.084	0.098	0.097	0.083	0.082	0.072	0.06	0.092	0.072	0.072	0.073	0.082	0.069		24.75	0.109	0.099	0.073	0.084	0.097	0.073	0.127	0.09	0.071	0.085	0.075	0.09	0.075	0.09	0.098	0.077	0.072	0.081	0.086	0.122	0.08	0.083	0.077	0.099
25	0.086	0.096	0.081	0.087	0.096	0.097	0.083	0.083	0.072	0.06	0.092	0.072	0.073	0.075	0.081	0.07		25	0.109	0.099	0.072	0.082	0.097	0.073	0.128	0.091	0.069	0.084	0.076	0.091	0.076	0.09	0.097	0.078	0.075	0.082	0.087	0.122	0.08	0.082	0.075	0.099
25.25	0.087	0.096	0.082	0.085	0.098	0.097	0.083	0.083	0.072	0.061	0.093	0.072	0.073	0.074	0.082	0.07		25.25	0.11	0.099	0.072	0.083	0.098	0.074	0.128	0.091	0.071	0.085	0.076	0.091	0.076	0.092	0.097	0.078	0.075	0.083	0.086	0.124	0.081	0.083	0.076	0.1
25.5	0.088	0.096	0.082	0.085	0.098	0.097	0.084	0.083	0.072	0.061	0.093	0.072	0.073	0.074	0.081	0.071		25.5	0.108	0.097	0.072	0.084	0.098	0.075	0.127	0.09	0.071	0.084	0.075	0.089	0.075	0.09	0.099	0.079	0.074	0.082	0.085	0.122	0.079	0.083	0.077	0.1
25.75	0.085	0.096	0.083	0.086	0.097	0.097	0.084	0.084	0.072	0.06	0.094	0.074	0.071	0.077	0.082	0.072		25.75	0.108	0.097	0.072	0.082	0.097	0.073	0.126	0.09	0.07	0.083	0.076	0.09	0.075	0.091	0.099	0.079	0.075	0.083	0.085	0.121	0.081	0.082	0.075	0.1
26	0.088	0.099	0.085	0.086	0.101	0.097	0.084	0.085	0.072	0.06	0.093	0.072	0.074	0.076	0.083	0.071		26	0.107	0.096	0.073	0.082	0.094	0.073	0.126	0.089	0.07	0.084	0.074	0.088	0.074	0.091	0.099	0.079	0.074	0.082	0.082	0.119	0.08	0.083	0.075	0.098
26.25	0.087	0.097	0.083	0.085	0.099	0.098	0.085	0.084	0.074	0.061	0.094	0.073	0.073	0.075	0.084	0.072		26.25	0.106	0.097	0.073	0.083	0.095	0.073	0.126	0.091	0.07	0.084	0.074	0.089	0.075	0.091	0.099	0.079	0.074	0.081	0.082	0.118	0.079	0.082	0.075	0.098
26.5	0.089	0.097	0.084	0.086	0.099	0.099	0.085	0.084	0.074	0.061	0.094	0.074	0.075	0.076	0.083	0.071		26.5	0.106	0.097	0.072	0.084	0.094	0.072	0.124	0.091	0.069	0.085	0.074	0.089	0.074	0.09	0.1	0.078	0.073	0.081	0.082	0.119	0.081	0.083	0.075	0.099
26.75	0.088	0.096	0.084	0.087	0.099	0.098	0.084	0.086	0.074	0.063	0.094	0.075	0.074	0.077	0.083	0.073		26.75	0.106	0.097	0.072	0.083	0.094	0.072	0.126	0.091	0.069	0.084	0.074	0.088	0.075	0.09	0.099	0.08	0.073	0.081	0.082	0.12	0.079	0.083	0.074	0.098
27	0.091	0.099	0.084	0.087	0.1	0.099	0.084	0.083	0.073	0.062	0.095	0.075	0.075	0.076	0.084	0.072		27	0.107	0.096	0.073	0.083	0.093	0.071	0.126	0.09	0.07	0.084	0.073	0.087	0.075	0.091	0.099	0.08	0.072	0.081	0.082	0.118	0.082	0.083	0.074	0.097
27.25	0.089	0.095	0.083	0.087	0.096	0.099	0.084	0.085	0.074	0.062	0.095	0.075	0.074	0.076	0.083	0.072		27.25	0.106	0.098	0.073	0.084	0.095	0.072	0.126	0.089	0.07	0.084	0.075	0.087	0.074	0.092	0.099	0.079	0.074	0.081	0.082	0.12	0.081	0.083	0.073	0.099
27.5	0.091	0.099	0.086	0.087	0.101	0.098	0.086	0.085	0.075	0.063	0.094	0.074	0.076	0.076	0.085	0.074		27.5	0.106	0.097	0.07	0.083	0.095	0.074	0.126	0.09	0.068	0.083	0.076	0.087	0.075	0.093	0.1	0.079	0.075	0.083	0.081	0.118	0.08	0.083	0.075	0.099
27.75	0.091	0.099	0.085	0.087	0.101	0.098	0.086	0.086	0.075	0.062	0.095	0.075	0.077	0.076	0.084	0.072		27.75	0.107	0.099	0.072	0.085	0.098	0.075	0.126	0.091	0.069	0.085	0.079	0.092	0.076	0.092	0.102	0.08	0.077	0.084	0.082	0.119	0.082	0.084	0.076	0.102
28	0.093	0.098	0.085	0.088	0.099	0.098	0.086	0.087	0.075	0.063	0.094	0.075	0.077	0.078	0.085	0.074		28	0.109	0.101	0.071	0.084	0.099	0.075	0.128	0.092	0.069	0.086	0.077	0.091	0.077	0.093	0.101	0.08	0.077	0.085	0.084	0.123	0.082	0.084	0.076	0.102
28.25	0.091	0.097	0.084	0.088	0.1	0.099	0.085	0.086	0.075	0.064	0.095	0.077	0.078	0.078	0.084	0.073		28.25	0.109	0.101	0.074	0.086	0.097	0.075	0.13	0.093	0.072	0.086	0.077	0.092	0.077	0.093	0.102	0.082	0.077	0.085	0.085	0.123	0.081	0.086	0.075	0.102
28.5	0.094	0.099	0.085	0.089	0.101	0.099	0.085	0.085	0.077	0.063	0.095	0.076	0.078	0.078	0.085	0.075		28.5	0.109	0.101	0.073	0.086	0.098	0.075	0.129	0.093	0.07	0.086	0.075	0.092	0.078	0.095	0.101	0.082	0.076	0.085	0.086	0.124	0.082	0.085	0.077	0.103
28.75	0.091	0.099	0.085	0.088	0.101	0.1	0.086	0.086	0.077	0.066	0.096	0.076	0.077	0.079	0.085	0.074		28.75	0.11	0.103	0.074	0.085	0.1	0.077	0.129	0.094	0.072	0.086	0.079	0.093	0.079	0.096	0.103	0.082	0.078	0.087	0.087	0.126	0.082	0.086	0.077	0.105
29	0.094	0.1	0.085	0.088	0.101	0.099	0.086	0.086	0.077	0.064	0.095	0.077	0.079	0.079	0.087	0.075		29	0.112	0.101	0.073	0.086	0.098	0.075	0.13	0.093	0.072	0.086	0.079	0.092	0.079	0.095	0.101	0.083	0.077	0.086	0.088	0.126	0.082	0.086	0.074	0.104
29.25	0.095	0.097	0.085	0.087	0.101	0.1	0.086	0.084	0.077	0.067	0.096	0.078	0.079	0.077	0.085	0.073		29.25	0.113	0.103	0.077	0.087	0.098	0.077	0.131	0.095	0.074	0.087	0.079	0.092	0.081	0.097	0.106	0.083	0.08	0.086	0.088	0.127	0.083	0.088	0.076	0.105
29.5	0.095	0.099	0.085	0.089	0.101	0.101	0.087	0.088	0.077	0.065	0.096	0.077	0.081	0.078	0.087	0.075		29.5	0.112	0.103	0.077	0.088	0.103	0.079	0.131	0.095	0.076	0.088	0.081	0.096	0.079	0.095	0.103	0.084	0.078	0.087	0.088	0.128	0.083	0.088	0.078	0.106
29.75	0.093	0.1	0.087	0.088	0.102	0.102	0.086	0.087	0.077	0.066	0.096	0.078	0.078	0.079	0.088	0.074		29.75	0.112	0.104	0.08	0.09	0.101	0.079	0.132	0.095	0.076	0.09	0.079	0.095	0.08	0.097	0.103	0.084	0.08	0.089	0.09	0.129	0.083	0.088	0.078	0.107
30	0.095	0.1	0.086	0.09	0.103	0.101	0.087	0.087	0.077	0.065	0.097	0.078	0.08	0.08	0.087	0.076		30	0.112	0.105	0.078	0.09	0.101	0.08	0.132	0.096	0.076	0.088	0.081	0.096	0.083	0.098	0.105	0.085	0.08	0.09	0.09	0.13	0.085	0.089	0.079	0.107
30.25	0.094	0.099	0.086	0.089	0.102	0.102	0.087	0.088	0.078	0.067	0.096	0.078	0.08	0.079	0.088	0.076		30.25	0.115	0.105	0.077	0.089	0.102	0.079	0.133	0.097	0.075	0.088	0.081	0.096	0.081	0.099	0.103	0.084	0.08	0.089	0.091	0.131	0.083	0.088	0.079	0.107
30.5	0.097	0.101	0.088	0.09	0.105	0.103	0.088	0.089	0.078	0.067	0.096	0.079	0.08	0.081	0.088	0.077		30.5	0.115	0.105	0.078	0.089	0.102	0.08	0.133	0.096	0.076	0.088	0.081	0.096	0.082	0.099	0.103	0.085	0.081	0.09	0.091	0.131	0.084	0.088	0.079	0.109
30.75	0.097	0.101	0.089	0.091	0.105	0.101	0.088	0.088	0.078	0.068	0.096	0.079	0.081	0.081	0.088	0.077		30.75	0.114	0.106	0.08	0.091	0.102	0.08	0.132	0.096	0.078	0.089	0.082	0.096	0.083	0.098	0.105	0.086	0.08	0.092	0.091	0.13	0.085	0.089	0.08	0.108
31	0.097	0.102	0.088	0.09	0.106	0.102	0.089	0.089	0.078	0.066	0.097	0.08	0.082	0.082	0.089	0.076		31	0.115	0.106	0.078	0.089	0.103	0.08	0.133	0.096	0.076	0.088	0.082	0.095	0.082	0.1	0.105	0.086	0.081	0.091	0.092	0.131	0.083	0.09	0.079	0.108
31.25	0.097	0.104	0.089	0.09	0.106	0.102	0.09	0.089	0.077	0.066	0.096	0.08	0.082	0.082	0.09	0.078		31.25	0.113	0.106	0.078	0.091	0.104	0.08	0.134	0.096	0.077	0.09	0.081	0.098	0.082	0.1	0.105	0.086	0.082	0.091	0.092	0.13	0.086	0.09	0.08	0.109
31.5	0.097	0.104	0.089	0.091	0.108	0.102	0.089	0.09	0.079	0.067	0.097	0.081	0.082	0.083	0.091	0.078		31.5	0.114	0.106	0.078	0.09	0.102	0.08	0.134	0.096	0.074	0.089	0.081	0.096	0.082	0.099	0.106	0.085	0.082	0.092	0.09	0.13	0.084	0.089	0.079	0.11
31.75	0.098	0.101	0.09	0.09	0.105	0.103	0.089	0.089	0.08	0.068	0.098	0.081	0.083	0.082	0.089	0.077		31.75	0.114	0.105	0.077	0.091	0.1	0.079	0.134	0.096	0.074	0.089	0.08	0.094	0.082	0.099	0.105	0.086	0.08	0.09	0.091	0.13	0.085	0.089	0.078	0.108
32	0.097	0.104	0.09	0.091	0.109	0.104	0.09	0.091	0.079	0.068	0.098	0.08	0.082	0.084	0.091	0.079		32	0.113	0.107	0.079	0.091	0.101	0.079	0.134	0.095	0.074	0.089	0.08	0.094	0.083	0.099	0.105	0.087	0.08	0.091	0.09	0.129	0.086	0.09	0.077	0.108
32.25	0.099	0.1	0.089	0.092	0.105	0.105	0.088	0.09	0.08	0.068	0.097	0.08	0.083	0.084	0.089	0.079		32.25	0.112	0.105	0.077	0.09	0.1	0.078	0.133	0.097	0.074	0.088	0.081	0.095	0.082	0.099	0.105	0.085	0.081	0.09	0.088	0.127	0.083	0.089	0.078	0.109
32.5	0.099	0.104	0.09	0.093	0.109	0.104	0.091	0.091	0.08	0.069	0.1	0.08	0.083	0.084	0.091	0.08		32.5	0.111	0.105	0.077	0.089	0.102	0.078	0.131	0.095	0.074	0.088	0.081	0.095	0.081	0.098	0.106	0.086	0.081	0.091	0.086	0.126	0.083	0.089	0.078	0.11
32.75	0.098	0.103	0.091	0.092	0.106	0.105	0.089	0.09	0.081	0.068	0.099	0.08	0.084	0.084	0.09	0.079		32.75	0.111	0.105	0.077	0.089	0.099	0.078	0.131	0.096	0.073	0.087	0.081	0.093	0.081	0.099	0.106	0.086	0.081	0.09	0.087	0.127	0.083	0.089	0.078	0.108
33	0.097	0.104	0.09	0.093	0.107	0.106	0.088	0.092	0.08	0.069	0.098	0.081	0.084	0.087	0.091	0.08		33	0.112	0.106	0.08	0.092	0.1	0.079	0.132	0.096	0.076	0.089	0.081	0.094	0.082	0.099	0.106	0.087	0.08	0.09	0.088	0.127	0.086	0.09	0.077	0.109
33.25	0.097	0.102	0.091	0.093	0.107	0.105	0.091	0.09	0.081	0.069	0.099	0.08	0.084	0.085	0.092	0.08		33.25	0.113	0.105	0.079	0.092	0.101	0.079	0.133	0.095	0.074	0.089	0.08	0.094	0.083	0.099	0.107	0.088	0.081	0.091	0.087	0.127	0.085	0.091	0.078	0.11
33.5	0.098	0.106	0.091	0.094	0.109	0.105	0.091	0.092	0.082	0.07	0.101	0.081	0.084	0.087	0.092	0.081		33.5	0.112	0.106	0.08	0.092	0.103	0.081	0.133	0.095	0.076	0.09	0.083	0.096	0.083	0.099	0.107	0.088	0.083	0.093	0.087	0.128	0.085	0.092	0.079	0.112
33.75	0.097	0.104	0.091	0.092	0.108	0.106	0.091	0.091	0.082	0.069	0.099	0.082	0.084	0.086	0.092	0.08		33.75	0.111	0.106	0.08	0.092	0.104	0.082	0.132	0.096	0.077	0.09	0.083	0.099	0.082	0.099	0.107	0.088	0.083	0.095	0.087	0.129	0.087	0.092	0.08	0.114
34	0.098	0.104	0.092	0.094	0.109	0.105	0.091	0.093	0.081	0.07	0.1	0.081	0.084	0.087	0.092	0.081		34	0.114	0.108	0.08	0.093	0.105	0.082	0.134	0.097	0.077	0.091	0.084	0.1	0.084	0.101	0.108	0.09	0.084	0.095	0.09	0.131	0.089	0.093	0.081	0.113
34.25	0.098	0.104	0.092	0.093	0.109	0.107	0.09	0.092	0.081	0.071	0.1	0.082	0.084	0.087	0.093	0.081		34.25	0.115	0.107	0.082	0.094	0.105	0.083	0.135	0.098	0.078	0.092	0.085	0.1	0.086	0.102	0.108	0.089	0.085	0.096	0.091	0.132	0.088	0.093	0.082	0.115
34.5	0.098	0.104	0.091	0.095	0.109	0.106	0.091	0.094	0.082	0.07	0.101	0.081	0.085	0.088	0.093	0.083		34.5	0.116	0.108	0.08	0.095	0.107	0.083	0.135	0.099	0.079	0.092	0.086	0.1	0.085	0.103	0.109	0.09	0.086	0.096	0.091	0.132	0.088	0.094	0.082	0.115
34.75	0.096	0.105	0.093	0.094	0.111	0.107	0.092	0.092	0.083	0.07	0.102	0.084	0.085	0.088	0.095	0.082		34.75	0.117	0.11	0.084	0.094	0.106	0.084	0.137	0.101	0.081	0.093	0.086	0.101	0.086	0.103	0.11	0.091	0.086	0.095	0.094	0.134	0.089	0.094	0.082	0.115
35	0.099	0.106	0.093	0.095	0.111	0.106	0.091	0.094	0.083	0.07	0.102	0.083	0.087	0.089	0.094	0.083		35	0.116	0.109	0.083	0.096	0.105	0.082	0.136	0.1	0.081	0.092	0.085	0.1	0.087	0.103	0.11	0.09	0.086	0.098	0.094	0.135	0.089	0.096	0.081	0.115
35.25	0.097	0.104	0.092	0.095	0.109	0.108	0.091	0.094	0.083	0.07	0.101	0.083	0.085	0.088	0.094	0.082		35.25	0.116	0.111	0.083	0.097	0.108	0.084	0.138	0.101	0.081	0.093	0.086	0.102	0.087	0.104	0.111	0.092	0.087	0.098	0.094	0.136	0.089	0.096	0.083	0.117
35.5	0.097	0.107	0.094	0.095	0.112	0.107	0.092	0.094	0.083	0.071	0.101	0.083	0.085	0.088	0.095	0.082		35.5	0.118	0.111	0.084	0.097	0.107	0.084	0.138	0.099	0.083	0.094	0.087	0.102	0.087	0.106	0.111	0.091	0.086	0.097	0.094	0.137	0.09	0.096	0.084	0.118
35.75	0.097	0.104	0.093	0.095	0.109	0.108	0.092	0.094	0.082	0.07	0.102	0.083	0.084	0.09	0.095	0.083		35.75	0.12	0.112	0.084	0.095	0.108	0.086	0.139	0.101	0.083	0.094	0.089	0.103	0.089	0.106	0.112	0.092	0.088	0.1	0.097	0.139	0.09	0.097	0.085	0.119
36	0.099	0.107	0.094	0.095	0.113	0.108	0.094	0.094	0.083	0.071	0.102	0.083	0.086	0.091	0.096	0.083		36	0.119	0.112	0.084	0.097	0.108	0.085	0.139	0.101	0.081	0.094	0.088	0.103	0.089	0.105	0.11	0.091	0.088	0.098	0.096	0.139	0.09	0.097	0.084	0.119
36.25	0.097	0.109	0.095	0.096	0.115	0.109	0.094	0.094	0.083	0.071	0.102	0.084	0.085	0.091	0.097	0.085		36.25	0.119	0.112	0.085	0.097	0.108	0.085	0.139	0.101	0.081	0.093	0.087	0.104	0.089	0.107	0.11	0.092	0.088	0.1	0.095	0.139	0.09	0.096	0.084	0.12
36.5	0.098	0.108	0.094	0.096	0.114	0.108	0.094	0.095	0.083	0.071	0.102	0.084	0.087	0.092	0.096	0.084		36.5	0.119	0.113	0.084	0.097	0.109	0.087	0.141	0.102	0.082	0.094	0.088	0.104	0.089	0.108	0.111	0.092	0.088	0.1	0.097	0.141	0.092	0.098	0.085	0.12
36.75	0.097	0.106	0.093	0.095	0.111	0.109	0.092	0.094	0.083	0.072	0.103	0.084	0.087	0.09	0.096	0.084		36.75	0.119	0.11	0.086	0.098	0.109	0.086	0.14	0.102	0.085	0.095	0.089	0.103	0.089	0.109	0.113	0.093	0.088	0.1	0.097	0.139	0.092	0.099	0.085	0.121
37	0.098	0.107	0.097	0.097	0.114	0.108	0.094	0.097	0.083	0.072	0.103	0.085	0.088	0.092	0.097	0.084		37	0.117	0.112	0.086	0.097	0.109	0.086	0.139	0.101	0.084	0.095	0.088	0.105	0.089	0.107	0.113	0.093	0.089	0.1	0.096	0.139	0.092	0.099	0.084	0.121
37.25	0.098	0.107	0.097	0.097	0.112	0.109	0.094	0.096	0.086	0.073	0.102	0.085	0.087	0.092	0.097	0.085		37.25	0.118	0.112	0.085	0.099	0.108	0.086	0.139	0.101	0.083	0.095	0.089	0.104	0.088	0.106	0.113	0.094	0.088	0.102	0.094	0.137	0.091	0.099	0.085	0.12
37.5	0.099	0.109	0.098	0.096	0.116	0.109	0.094	0.096	0.084	0.072	0.102	0.085	0.088	0.092	0.098	0.086		37.5	0.119	0.113	0.085	0.098	0.106	0.086	0.137	0.101	0.082	0.096	0.088	0.102	0.089	0.106	0.113	0.094	0.089	0.1	0.095	0.137	0.09	0.098	0.084	0.12
37.75	0.098	0.109	0.098	0.098	0.115	0.109	0.094	0.097	0.085	0.073	0.104	0.086	0.087	0.095	0.098	0.086		37.75	0.119	0.113	0.082	0.096	0.106	0.085	0.14	0.102	0.08	0.094	0.088	0.102	0.09	0.108	0.114	0.093	0.087	0.1	0.095	0.138	0.091	0.098	0.083	0.12
38	0.099	0.11	0.099	0.098	0.115	0.11	0.094	0.097	0.085	0.073	0.103	0.086	0.09	0.095	0.099	0.086		38	0.118	0.112	0.083	0.098	0.105	0.086	0.14	0.102	0.079	0.094	0.087	0.101	0.089	0.108	0.113	0.095	0.089	0.099	0.093	0.138	0.091	0.099	0.085	0.12
38.25	0.1	0.11	0.099	0.098	0.115	0.111	0.096	0.098	0.086	0.073	0.104	0.087	0.089	0.093	0.099	0.086		38.25	0.118	0.11	0.084	0.097	0.106	0.084	0.139	0.101	0.08	0.095	0.087	0.102	0.089	0.107	0.113	0.095	0.089	0.1	0.094	0.136	0.091	0.098	0.084	0.12
38.5	0.101	0.111	0.098	0.099	0.116	0.11	0.095	0.096	0.086	0.074	0.105	0.086	0.09	0.095	0.099	0.087		38.5	0.117	0.113	0.085	0.099	0.107	0.084	0.139	0.101	0.082	0.094	0.088	0.102	0.088	0.107	0.114	0.095	0.089	0.099	0.092	0.135	0.092	0.098	0.084	0.121
38.75	0.1	0.108	0.097	0.098	0.114	0.111	0.095	0.098	0.086	0.075	0.104	0.088	0.09	0.094	0.098	0.087		38.75	0.116	0.112	0.086	0.099	0.106	0.085	0.139	0.101	0.081	0.095	0.086	0.102	0.088	0.106	0.115	0.094	0.088	0.102	0.092	0.136	0.092	0.099	0.084	0.121
39	0.103	0.109	0.098	0.098	0.115	0.11	0.095	0.097	0.086	0.074	0.105	0.088	0.092	0.095	0.1	0.086		39	0.118	0.113	0.086	0.098	0.107	0.086	0.14	0.101	0.08	0.096	0.088	0.103	0.089	0.108	0.114	0.095	0.09	0.102	0.094	0.138	0.093	0.1	0.086	0.122
39.25	0.102	0.109	0.1	0.097	0.115	0.111	0.095	0.096	0.087	0.076	0.104	0.088	0.091	0.095	0.1	0.087		39.25	0.118	0.112	0.085	0.098	0.11	0.087	0.139	0.103	0.081	0.095	0.09	0.106	0.09	0.107	0.115	0.095	0.09	0.102	0.093	0.138	0.091	0.099	0.086	0.124
39.5	0.104	0.109	0.1	0.099	0.115	0.111	0.095	0.097	0.087	0.074	0.106	0.087	0.093	0.095	0.099	0.087		39.5	0.118	0.113	0.083	0.099	0.11	0.087	0.142	0.101	0.081	0.094	0.089	0.107	0.09	0.109	0.114	0.095	0.091	0.104	0.094	0.139	0.093	0.099	0.087	0.124
39.75	0.103	0.108	0.101	0.099	0.114	0.113	0.094	0.098	0.088	0.073	0.105	0.088	0.092	0.096	0.099	0.087		39.75	0.119	0.114	0.087	0.101	0.111	0.087	0.141	0.102	0.084	0.097	0.089	0.105	0.091	0.109	0.115	0.095	0.092	0.103	0.095	0.14	0.093	0.101	0.086	0.124
40	0.104	0.11	0.101	0.1	0.117	0.111	0.095	0.099	0.088	0.075	0.107	0.087	0.093	0.097	0.1	0.088		40	0.118	0.115	0.088	0.101	0.111	0.088	0.142	0.104	0.083	0.096	0.093	0.107	0.092	0.111	0.115	0.097	0.094	0.105	0.097	0.14	0.095	0.102	0.088	0.125
40.25	0.104	0.109	0.101	0.098	0.115	0.111	0.096	0.097	0.088	0.075	0.106	0.088	0.093	0.095	0.1	0.087		40.25	0.12	0.116	0.089	0.102	0.111	0.089	0.142	0.104	0.086	0.097	0.092	0.106	0.091	0.111	0.116	0.098	0.093	0.106	0.098	0.143	0.094	0.103	0.088	0.127
40.5	0.105	0.11	0.101	0.098	0.118	0.113	0.096	0.098	0.089	0.075	0.105	0.087	0.094	0.097	0.102	0.088		40.5	0.121	0.116	0.089	0.102	0.113	0.09	0.143	0.104	0.086	0.099	0.093	0.111	0.092	0.111	0.116	0.097	0.093	0.106	0.098	0.143	0.095	0.102	0.089	0.128
40.75	0.105	0.111	0.102	0.098	0.118	0.112	0.096	0.098	0.089	0.075	0.106	0.088	0.096	0.097	0.101	0.087		40.75	0.121	0.116	0.089	0.102	0.111	0.091	0.144	0.105	0.085	0.097	0.092	0.109	0.093	0.112	0.118	0.098	0.094	0.108	0.099	0.145	0.094	0.103	0.089	0.128
41	0.107	0.111	0.101	0.1	0.118	0.112	0.097	0.098	0.09	0.077	0.107	0.089	0.096	0.097	0.102	0.089		41	0.122	0.116	0.09	0.104	0.113	0.091	0.144	0.106	0.086	0.098	0.093	0.11	0.094	0.112	0.117	0.099	0.094	0.108	0.1	0.145	0.097	0.103	0.09	0.129
41.25	0.106	0.109	0.102	0.1	0.115	0.113	0.096	0.099	0.089	0.076	0.107	0.09	0.097	0.098	0.102	0.089		41.25	0.123	0.117	0.091	0.104	0.114	0.091	0.146	0.106	0.087	0.099	0.094	0.111	0.094	0.112	0.118	0.099	0.094	0.109	0.101	0.146	0.096	0.105	0.091	0.131
41.5	0.104	0.111	0.103	0.1	0.118	0.113	0.097	0.099	0.091	0.077	0.107	0.089	0.096	0.098	0.102	0.089		41.5	0.123	0.118	0.091	0.104	0.114	0.093	0.145	0.107	0.088	0.098	0.094	0.111	0.096	0.115	0.119	0.1	0.095	0.108	0.103	0.147	0.097	0.105	0.091	0.131
41.75	0.107	0.11	0.103	0.1	0.117	0.113	0.096	0.099	0.09	0.078	0.107	0.089	0.097	0.097	0.103	0.091		41.75	0.124	0.119	0.092	0.104	0.114	0.092	0.146	0.107	0.087	0.099	0.095	0.111	0.095	0.114	0.118	0.099	0.095	0.109	0.103	0.148	0.096	0.105	0.09	0.132
42	0.105	0.113	0.104	0.101	0.12	0.113	0.098	0.101	0.091	0.077	0.108	0.09	0.095	0.099	0.105	0.09		42	0.124	0.119	0.091	0.103	0.115	0.091	0.146	0.107	0.089	0.1	0.095	0.112	0.096	0.114	0.119	0.101	0.096	0.11	0.103	0.147	0.098	0.106	0.092	0.132
42.25	0.106	0.11	0.103	0.1	0.117	0.115	0.096	0.101	0.09	0.077	0.107	0.091	0.096	0.099	0.104	0.09		42.25	0.124	0.12	0.092	0.106	0.116	0.092	0.145	0.107	0.089	0.1	0.096	0.112	0.096	0.114	0.118	0.1	0.095	0.111	0.103	0.149	0.098	0.106	0.092	0.133
42.5	0.105	0.112	0.103	0.102	0.12	0.114	0.097	0.101	0.09	0.076	0.108	0.09	0.096	0.101	0.104	0.092		42.5	0.125	0.12	0.091	0.105	0.116	0.092	0.146	0.108	0.089	0.1	0.096	0.112	0.097	0.115	0.119	0.1	0.098	0.111	0.103	0.148	0.097	0.107	0.093	0.133
42.75	0.106	0.111	0.102	0.101	0.119	0.116	0.097	0.1	0.09	0.078	0.109	0.091	0.097	0.101	0.104	0.09		42.75	0.124	0.118	0.092	0.105	0.118	0.093	0.146	0.107	0.091	0.1	0.097	0.114	0.096	0.116	0.119	0.101	0.096	0.113	0.103	0.148	0.099	0.106	0.091	0.133
43	0.105	0.112	0.102	0.102	0.119	0.114	0.097	0.102	0.092	0.076	0.108	0.091	0.096	0.101	0.104	0.092		43	0.123	0.118	0.093	0.106	0.114	0.091	0.144	0.106	0.089	0.1	0.094	0.11	0.096	0.115	0.121	0.1	0.097	0.111	0.1	0.146	0.098	0.106	0.091	0.132
43.25	0.105	0.112	0.104	0.101	0.121	0.116	0.099	0.102	0.091	0.078	0.107	0.092	0.097	0.101	0.106	0.092		43.25	0.122	0.119	0.091	0.104	0.113	0.091	0.146	0.106	0.089	0.1	0.095	0.11	0.096	0.114	0.12	0.101	0.096	0.109	0.1	0.146	0.097	0.106	0.09	0.132
43.5	0.104	0.113	0.103	0.102	0.121	0.116	0.099	0.102	0.091	0.077	0.109	0.09	0.096	0.102	0.106	0.092		43.5	0.123	0.118	0.091	0.105	0.114	0.091	0.146	0.107	0.087	0.1	0.094	0.11	0.096	0.113	0.119	0.1	0.097	0.11	0.1	0.146	0.098	0.106	0.091	0.131
43.75	0.103	0.113	0.105	0.102	0.12	0.116	0.099	0.103	0.092	0.078	0.108	0.093	0.096	0.102	0.107	0.094		43.75	0.122	0.118	0.092	0.105	0.114	0.092	0.145	0.105	0.088	0.099	0.095	0.11	0.096	0.114	0.12	0.101	0.097	0.112	0.1	0.145	0.097	0.106	0.091	0.132
44	0.104	0.115	0.105	0.103	0.123	0.116	0.099	0.102	0.092	0.078	0.109	0.091	0.097	0.102	0.106	0.095		44	0.123	0.12	0.092	0.104	0.114	0.091	0.147	0.106	0.087	0.099	0.094	0.111	0.096	0.115	0.121	0.102	0.097	0.112	0.099	0.145	0.098	0.107	0.091	0.131
44.25	0.104	0.114	0.106	0.103	0.123	0.116	0.1	0.102	0.092	0.078	0.11	0.092	0.097	0.103	0.107	0.094		44.25	0.121	0.118	0.092	0.106	0.111	0.091	0.145	0.106	0.087	0.1	0.094	0.109	0.096	0.114	0.12	0.104	0.096	0.11	0.099	0.145	0.098	0.107	0.091	0.132
44.5	0.106	0.116	0.107	0.104	0.122	0.117	0.101	0.104	0.092	0.079	0.11	0.093	0.097	0.104	0.107	0.095		44.5	0.122	0.118	0.093	0.106	0.113	0.092	0.145	0.107	0.088	0.101	0.095	0.111	0.097	0.116	0.122	0.104	0.097	0.111	0.099	0.144	0.099	0.107	0.09	0.133
44.75	0.104	0.114	0.106	0.104	0.123	0.117	0.1	0.104	0.092	0.08	0.109	0.092	0.097	0.104	0.107	0.095		44.75	0.122	0.117	0.093	0.105	0.117	0.093	0.145	0.106	0.088	0.101	0.097	0.112	0.097	0.117	0.121	0.103	0.099	0.112	0.099	0.147	0.099	0.107	0.093	0.135
45	0.107	0.116	0.107	0.104	0.124	0.119	0.101	0.104	0.094	0.08	0.11	0.093	0.099	0.106	0.109	0.096		45	0.123	0.12	0.092	0.106	0.117	0.095	0.146	0.108	0.087	0.101	0.097	0.113	0.097	0.116	0.123	0.102	0.099	0.114	0.101	0.148	0.099	0.107	0.093	0.136
45.25	0.106	0.118	0.11	0.104	0.124	0.118	0.101	0.106	0.092	0.079	0.11	0.093	0.098	0.106	0.109	0.097		45.25	0.125	0.12	0.093	0.106	0.117	0.093	0.148	0.108	0.088	0.102	0.097	0.112	0.098	0.119	0.121	0.103	0.097	0.115	0.104	0.15	0.099	0.109	0.094	0.136
45.5	0.107	0.114	0.107	0.105	0.123	0.118	0.101	0.104	0.093	0.079	0.11	0.095	0.1	0.106	0.108	0.096		45.5	0.126	0.122	0.091	0.106	0.117	0.094	0.148	0.108	0.087	0.101	0.097	0.115	0.098	0.119	0.123	0.103	0.1	0.114	0.104	0.151	0.101	0.108	0.094	0.137
45.75	0.106	0.115	0.108	0.104	0.124	0.119	0.1	0.104	0.095	0.08	0.11	0.094	0.099	0.105	0.109	0.096		45.75	0.127	0.123	0.093	0.106	0.118	0.094	0.149	0.11	0.088	0.101	0.098	0.115	0.101	0.119	0.122	0.104	0.1	0.117	0.105	0.151	0.099	0.109	0.094	0.139
46	0.107	0.115	0.109	0.106	0.124	0.119	0.101	0.107	0.093	0.08	0.11	0.094	0.101	0.106	0.11	0.098		46	0.127	0.122	0.094	0.108	0.12	0.097	0.151	0.111	0.091	0.103	0.099	0.117	0.1	0.12	0.123	0.104	0.101	0.117	0.106	0.152	0.101	0.11	0.096	0.14
46.25	0.107	0.114	0.108	0.104	0.122	0.12	0.101	0.105	0.094	0.08	0.111	0.094	0.1	0.107	0.11	0.096		46.25	0.128	0.124	0.094	0.109	0.119	0.096	0.15	0.11	0.091	0.103	0.099	0.116	0.101	0.12	0.122	0.106	0.101	0.118	0.108	0.154	0.101	0.11	0.096	0.14
46.5	0.108	0.116	0.108	0.106	0.126	0.119	0.101	0.107	0.094	0.081	0.111	0.094	0.103	0.108	0.11	0.097		46.5	0.128	0.124	0.095	0.109	0.119	0.096	0.152	0.111	0.091	0.103	0.099	0.117	0.101	0.12	0.124	0.107	0.103	0.118	0.108	0.155	0.103	0.111	0.097	0.14
46.75	0.107	0.116	0.109	0.105	0.124	0.12	0.102	0.106	0.095	0.082	0.111	0.095	0.102	0.107	0.111	0.098		46.75	0.129	0.123	0.095	0.108	0.118	0.096	0.151	0.111	0.093	0.104	0.099	0.116	0.102	0.122	0.124	0.106	0.101	0.118	0.108	0.156	0.103	0.111	0.096	0.141
47	0.108	0.116	0.108	0.106	0.126	0.119	0.101	0.107	0.095	0.081	0.111	0.095	0.104	0.109	0.11	0.098		47	0.13	0.124	0.098	0.11	0.118	0.097	0.152	0.111	0.094	0.105	0.101	0.117	0.102	0.121	0.125	0.106	0.101	0.119	0.107	0.156	0.104	0.113	0.096	0.142
47.25	0.106	0.116	0.11	0.106	0.126	0.12	0.103	0.107	0.094	0.081	0.111	0.097	0.102	0.108	0.111	0.098		47.25	0.13	0.125	0.099	0.111	0.119	0.096	0.152	0.112	0.097	0.105	0.101	0.118	0.103	0.123	0.126	0.107	0.103	0.118	0.109	0.157	0.105	0.114	0.096	0.142
47.5	0.109	0.117	0.109	0.107	0.125	0.119	0.103	0.106	0.097	0.081	0.112	0.095	0.103	0.109	0.111	0.099		47.5	0.131	0.126	0.098	0.109	0.122	0.098	0.154	0.113	0.094	0.105	0.101	0.118	0.104	0.123	0.125	0.108	0.103	0.121	0.11	0.16	0.104	0.113	0.097	0.143
47.75	0.107	0.118	0.112	0.106	0.127	0.121	0.103	0.106	0.097	0.084	0.112	0.096	0.102	0.108	0.112	0.098		47.75	0.131	0.127	0.1	0.112	0.123	0.099	0.152	0.114	0.096	0.107	0.102	0.119	0.103	0.123	0.125	0.109	0.105	0.122	0.11	0.159	0.104	0.115	0.099	0.143
48	0.109	0.118	0.111	0.107	0.129	0.12	0.103	0.108	0.097	0.082	0.113	0.096	0.104	0.11	0.112	0.101		48	0.131	0.127	0.099	0.112	0.122	0.099	0.153	0.114	0.096	0.105	0.102	0.12	0.104	0.123	0.126	0.109	0.104	0.121	0.111	0.159	0.106	0.115	0.1	0.145
48.25	0.109	0.119	0.111	0.106	0.13	0.121	0.105	0.107	0.096	0.082	0.112	0.096	0.103	0.109	0.114	0.099		48.25	0.131	0.127	0.099	0.111	0.123	0.1	0.153	0.114	0.096	0.106	0.103	0.121	0.103	0.123	0.126	0.109	0.105	0.123	0.11	0.159	0.105	0.115	0.1	0.146
48.5	0.109	0.117	0.11	0.107	0.126	0.121	0.104	0.111	0.097	0.083	0.113	0.098	0.104	0.111	0.111	0.101		48.5	0.129	0.126	0.098	0.112	0.123	0.099	0.153	0.113	0.096	0.106	0.104	0.12	0.104	0.123	0.126	0.108	0.106	0.124	0.109	0.158	0.105	0.114	0.1	0.146
48.75	0.108	0.12	0.112	0.107	0.129	0.123	0.105	0.107	0.096	0.083	0.113	0.098	0.103	0.11	0.115	0.1		48.75	0.131	0.127	0.1	0.113	0.123	0.098	0.154	0.113	0.095	0.107	0.103	0.12	0.106	0.125	0.127	0.109	0.105	0.122	0.111	0.158	0.106	0.115	0.099	0.146
49	0.109	0.12	0.113	0.108	0.13	0.122	0.105	0.11	0.097	0.083	0.115	0.098	0.105	0.112	0.114	0.101		49	0.129	0.126	0.099	0.113	0.121	0.098	0.152	0.112	0.095	0.106	0.101	0.119	0.103	0.124	0.127	0.11	0.105	0.122	0.108	0.157	0.106	0.114	0.098	0.145
49.25	0.107	0.12	0.114	0.107	0.129	0.123	0.106	0.109	0.097	0.084	0.114	0.098	0.104	0.111	0.115	0.101		49.25	0.128	0.126	0.099	0.112	0.121	0.098	0.152	0.112	0.094	0.106	0.102	0.119	0.103	0.124	0.126	0.111	0.105	0.123	0.106	0.156	0.106	0.115	0.099	0.147
49.5	0.109	0.12	0.114	0.108	0.131	0.123	0.105	0.112	0.097	0.084	0.114	0.098	0.105	0.112	0.115	0.102		49.5	0.128	0.126	0.101	0.112	0.12	0.098	0.153	0.112	0.093	0.107	0.103	0.12	0.104	0.125	0.127	0.111	0.104	0.121	0.106	0.157	0.106	0.115	0.098	0.145
49.75	0.108	0.12	0.114	0.11	0.131	0.124	0.106	0.111	0.097	0.085	0.114	0.098	0.105	0.113	0.116	0.103		49.75	0.128	0.126	0.098	0.113	0.12	0.099	0.151	0.112	0.093	0.105	0.102	0.118	0.103	0.124	0.128	0.111	0.105	0.124	0.106	0.156	0.105	0.115	0.1	0.145
50	0.11	0.121	0.114	0.11	0.132	0.123	0.106	0.112	0.098	0.086	0.116	0.1	0.106	0.114	0.116	0.103		50	0.128	0.126	0.098	0.112	0.121	0.098	0.154	0.112	0.094	0.106	0.103	0.119	0.104	0.125	0.129	0.11	0.105	0.123	0.106	0.157	0.106	0.116	0.098	0.148
50.25	0.11	0.122	0.113	0.11	0.131	0.123	0.106	0.112	0.099	0.085	0.115	0.099	0.106	0.116	0.116	0.103		50.25	0.13	0.126	0.099	0.113	0.121	0.098	0.154	0.112	0.095	0.106	0.103	0.12	0.105	0.125	0.128	0.111	0.105	0.124	0.106	0.156	0.105	0.116	0.098	0.147
50.5	0.111	0.121	0.113	0.108	0.133	0.123	0.106	0.11	0.1	0.086	0.115	0.099	0.107	0.112	0.117	0.102		50.5	0.129	0.126	0.099	0.111	0.12	0.097	0.152	0.113	0.095	0.106	0.103	0.119	0.105	0.126	0.128	0.112	0.106	0.123	0.107	0.156	0.106	0.116	0.099	0.147
50.75	0.11	0.122	0.115	0.111	0.133	0.123	0.107	0.112	0.099	0.087	0.116	0.099	0.107	0.115	0.118	0.104		50.75	0.129	0.126	0.099	0.112	0.124	0.1	0.154	0.112	0.094	0.107	0.105	0.122	0.105	0.124	0.13	0.113	0.105	0.127	0.107	0.156	0.107	0.116	0.102	0.15
51	0.111	0.119	0.113	0.11	0.131	0.125	0.105	0.112	0.099	0.086	0.116	0.101	0.091	0.115	0.116	0.105		51	0.129	0.127	0.097	0.113	0.122	0.1	0.154	0.114	0.094	0.106	0.105	0.122	0.106	0.126	0.131	0.112	0.108	0.126	0.107	0.157	0.106	0.116	0.1	0.15
51.25	0.111	0.122	0.114	0.111	0.132	0.126	0.108	0.111	0.099	0.087	0.116	0.103	0.09	0.115	0.118	0.104		51.25	0.131	0.129	0.099	0.113	0.124	0.102	0.154	0.114	0.096	0.108	0.107	0.122	0.107	0.129	0.129	0.113	0.108	0.128	0.109	0.159	0.106	0.117	0.102	0.151
51.5	0.112	0.12	0.113	0.11	0.132	0.125	0.106	0.112	0.1	0.087	0.116	0.1	0.092	0.114	0.117	0.105		51.5	0.132	0.129	0.102	0.114	0.126	0.102	0.156	0.115	0.098	0.109	0.106	0.125	0.107	0.129	0.131	0.113	0.108	0.128	0.11	0.159	0.109	0.118	0.102	0.153
51.75	0.112	0.121	0.115	0.109	0.132	0.126	0.107	0.111	0.101	0.088	0.116	0.101	0.092	0.115	0.118	0.104		51.75	0.133	0.129	0.103	0.115	0.126	0.101	0.156	0.117	0.098	0.109	0.108	0.125	0.108	0.128	0.131	0.114	0.108	0.129	0.111	0.163	0.109	0.119	0.102	0.152
52	0.112	0.122	0.114	0.11	0.134	0.125	0.107	0.114	0.1	0.087	0.117	0.103	0.093	0.116	0.119	0.106		52	0.134	0.13	0.103	0.117	0.126	0.103	0.157	0.116	0.099	0.11	0.107	0.126	0.108	0.13	0.132	0.115	0.109	0.129	0.112	0.164	0.11	0.12	0.104	0.153
52.25	0.112	0.122	0.114	0.11	0.133	0.127	0.108	0.112	0.101	0.088	0.117	0.103	0.092	0.115	0.119	0.106		52.25	0.134	0.132	0.105	0.116	0.128	0.104	0.159	0.118	0.101	0.11	0.11	0.127	0.11	0.13	0.133	0.116	0.112	0.13	0.114	0.165	0.111	0.121	0.105	0.156
52.5	0.112	0.122	0.115	0.111	0.133	0.125	0.107	0.113	0.101	0.088	0.118	0.103	0.094	0.117	0.119	0.106		52.5	0.134	0.132	0.103	0.118	0.128	0.103	0.16	0.118	0.1	0.11	0.11	0.126	0.111	0.131	0.132	0.115	0.111	0.131	0.115	0.166	0.111	0.122	0.105	0.155
52.75	0.113	0.121	0.116	0.111	0.133	0.127	0.109	0.113	0.101	0.089	0.117	0.103	0.094	0.116	0.119	0.105		52.75	0.136	0.132	0.104	0.118	0.13	0.104	0.159	0.119	0.1	0.11	0.11	0.128	0.112	0.133	0.133	0.116	0.112	0.132	0.115	0.167	0.112	0.122	0.105	0.158
53	0.115	0.123	0.117	0.111	0.136	0.127	0.109	0.114	0.102	0.088	0.117	0.104	0.094	0.118	0.121	0.107		53	0.137	0.133	0.106	0.119	0.13	0.106	0.16	0.119	0.103	0.11	0.112	0.127	0.112	0.132	0.134	0.117	0.112	0.133	0.116	0.169	0.112	0.123	0.107	0.16
53.25	0.114	0.124	0.116	0.111	0.135	0.129	0.108	0.113	0.102	0.089	0.118	0.104	0.094	0.118	0.12	0.106		53.25	0.138	0.134	0.105	0.118	0.128	0.105	0.16	0.118	0.1	0.111	0.11	0.127	0.111	0.133	0.134	0.117	0.113	0.134	0.117	0.17	0.111	0.121	0.107	0.158
53.5	0.115	0.124	0.118	0.112	0.136	0.126	0.109	0.116	0.102	0.089	0.118	0.104	0.095	0.12	0.122	0.107		53.5	0.137	0.135	0.105	0.118	0.129	0.104	0.159	0.12	0.102	0.112	0.111	0.129	0.114	0.134	0.134	0.117	0.114	0.134	0.118	0.171	0.111	0.124	0.107	0.159
53.75	0.115	0.123	0.115	0.112	0.134	0.128	0.109	0.115	0.103	0.089	0.118	0.104	0.096	0.12	0.121	0.107		53.75	0.138	0.134	0.108	0.12	0.131	0.108	0.161	0.12	0.104	0.113	0.112	0.13	0.113	0.133	0.134	0.118	0.113	0.135	0.117	0.17	0.113	0.125	0.109	0.16
54	0.116	0.126	0.118	0.112	0.137	0.128	0.11	0.116	0.103	0.09	0.12	0.105	0.097	0.121	0.122	0.109		54	0.138	0.136	0.108	0.12	0.132	0.109	0.161	0.12	0.105	0.113	0.113	0.131	0.112	0.136	0.135	0.118	0.114	0.136	0.118	0.172	0.114	0.125	0.108	0.162
54.25	0.114	0.124	0.119	0.114	0.139	0.129	0.111	0.115	0.104	0.091	0.119	0.106	0.096	0.121	0.123	0.108		54.25	0.138	0.135	0.106	0.121	0.131	0.108	0.162	0.121	0.104	0.113	0.113	0.13	0.113	0.135	0.135	0.119	0.115	0.136	0.118	0.17	0.115	0.126	0.108	0.162
54.5	0.117	0.122	0.117	0.113	0.137	0.129	0.11	0.116	0.103	0.092	0.119	0.106	0.097	0.12	0.122	0.109		54.5	0.14	0.137	0.107	0.121	0.131	0.106	0.162	0.12	0.102	0.113	0.112	0.129	0.114	0.135	0.135	0.12	0.115	0.136	0.118	0.172	0.115	0.125	0.108	0.161
54.75	0.117	0.125	0.119	0.114	0.138	0.129	0.11	0.117	0.105	0.091	0.12	0.107	0.098	0.123	0.124	0.11		54.75	0.138	0.135	0.108	0.121	0.128	0.106	0.163	0.121	0.104	0.114	0.111	0.129	0.113	0.133	0.134	0.12	0.113	0.135	0.118	0.17	0.114	0.125	0.107	0.16
55	0.116	0.125	0.118	0.114	0.139	0.13	0.112	0.118	0.105	0.091	0.12	0.106	0.097	0.122	0.124	0.11		55	0.136	0.135	0.107	0.12	0.13	0.106	0.161	0.119	0.102	0.113	0.112	0.129	0.113	0.133	0.136	0.119	0.114	0.137	0.115	0.168	0.114	0.125	0.108	0.163
55.25	0.117	0.126	0.119	0.113	0.138	0.13	0.111	0.117	0.105	0.092	0.12	0.108	0.099	0.122	0.125	0.11		55.25	0.136	0.133	0.107	0.12	0.128	0.105	0.16	0.12	0.103	0.113	0.111	0.13	0.113	0.134	0.137	0.121	0.115	0.137	0.115	0.169	0.115	0.126	0.108	0.163
55.5	0.118	0.123	0.117	0.115	0.137	0.133	0.11	0.119	0.105	0.093	0.121	0.106	0.099	0.123	0.123	0.11		55.5	0.136	0.134	0.108	0.121	0.128	0.106	0.161	0.12	0.104	0.114	0.112	0.128	0.112	0.134	0.136	0.12	0.115	0.138	0.114	0.168	0.114	0.126	0.107	0.163
55.75	0.118	0.127	0.118	0.116	0.141	0.132	0.112	0.118	0.105	0.093	0.121	0.107	0.1	0.125	0.126	0.112		55.75	0.137	0.134	0.107	0.12	0.129	0.106	0.161	0.121	0.103	0.113	0.111	0.128	0.113	0.135	0.136	0.12	0.115	0.135	0.115	0.169	0.115	0.126	0.108	0.162
56	0.119	0.127	0.119	0.115	0.143	0.132	0.113	0.12	0.105	0.093	0.123	0.108	0.1	0.125	0.127	0.112		56	0.137	0.135	0.106	0.12	0.128	0.106	0.162	0.121	0.101	0.113	0.112	0.128	0.115	0.136	0.14	0.121	0.115	0.137	0.116	0.17	0.113	0.125	0.107	0.163
56.25	0.117	0.127	0.119	0.116	0.143	0.132	0.113	0.12	0.106	0.093	0.122	0.108	0.099	0.125	0.127	0.113		56.25	0.135	0.135	0.106	0.119	0.128	0.106	0.16	0.119	0.1	0.112	0.114	0.13	0.113	0.135	0.137	0.121	0.115	0.137	0.114	0.168	0.113	0.125	0.108	0.164
56.5	0.119	0.128	0.119	0.117	0.141	0.132	0.113	0.121	0.106	0.094	0.122	0.109	0.101	0.126	0.127	0.112		56.5	0.136	0.134	0.108	0.122	0.13	0.107	0.161	0.12	0.104	0.114	0.114	0.132	0.114	0.134	0.138	0.122	0.117	0.141	0.114	0.169	0.117	0.128	0.11	0.166
56.75	0.12	0.125	0.119	0.115	0.142	0.132	0.113	0.118	0.106	0.094	0.123	0.108	0.102	0.125	0.126	0.112		56.75	0.137	0.136	0.107	0.122	0.13	0.108	0.161	0.12	0.102	0.116	0.115	0.131	0.114	0.137	0.139	0.122	0.116	0.14	0.116	0.17	0.115	0.127	0.109	0.167
57	0.118	0.128	0.12	0.117	0.143	0.132	0.113	0.121	0.108	0.096	0.122	0.111	0.101	0.128	0.129	0.115		57	0.139	0.137	0.108	0.123	0.133	0.109	0.163	0.122	0.103	0.114	0.115	0.133	0.116	0.138	0.14	0.124	0.116	0.141	0.118	0.173	0.116	0.128	0.11	0.167
57.25	0.121	0.128	0.121	0.118	0.144	0.134	0.115	0.123	0.108	0.094	0.124	0.11	0.103	0.129	0.129	0.114		57.25	0.14	0.138	0.109	0.123	0.133	0.109	0.164	0.121	0.104	0.114	0.116	0.133	0.118	0.141	0.139	0.125	0.119	0.142	0.119	0.174	0.117	0.129	0.11	0.169
57.5	0.121	0.128	0.121	0.116	0.144	0.135	0.114	0.122	0.108	0.096	0.123	0.11	0.103	0.129	0.129	0.114		57.5	0.14	0.139	0.109	0.122	0.132	0.109	0.165	0.122	0.105	0.114	0.114	0.133	0.117	0.139	0.138	0.124	0.119	0.143	0.119	0.173	0.117	0.13	0.112	0.168
57.75	0.122	0.129	0.123	0.116	0.144	0.135	0.114	0.121	0.109	0.096	0.124	0.111	0.104	0.128	0.129	0.115		57.75	0.141	0.139	0.111	0.123	0.134	0.11	0.166	0.123	0.106	0.115	0.117	0.134	0.118	0.141	0.14	0.125	0.118	0.144	0.12	0.175	0.118	0.129	0.112	0.17
58	0.122	0.128	0.121	0.118	0.143	0.134	0.114	0.121	0.108	0.096	0.125	0.111	0.104	0.129	0.128	0.114		58	0.142	0.141	0.113	0.126	0.135	0.113	0.167	0.124	0.108	0.117	0.118	0.136	0.117	0.141	0.14	0.127	0.12	0.144	0.122	0.176	0.12	0.131	0.114	0.172
58.25	0.121	0.127	0.12	0.117	0.144	0.135	0.115	0.122	0.109	0.097	0.125	0.11	0.104	0.129	0.129	0.115		58.25	0.143	0.14	0.113	0.126	0.136	0.113	0.167	0.125	0.108	0.118	0.118	0.136	0.119	0.141	0.142	0.126	0.121	0.146	0.124	0.179	0.121	0.133	0.114	0.173
58.5	0.122	0.13	0.121	0.118	0.146	0.135	0.116	0.123	0.109	0.097	0.125	0.111	0.104	0.13	0.13	0.116		58.5	0.143	0.141	0.115	0.127	0.136	0.112	0.168	0.126	0.111	0.118	0.119	0.136	0.119	0.142	0.142	0.128	0.121	0.145	0.124	0.179	0.121	0.133	0.114	0.173
58.75	0.122	0.13	0.121	0.119	0.145	0.135	0.117	0.126	0.11	0.097	0.124	0.111	0.104	0.132	0.131	0.117		58.75	0.145	0.143	0.113	0.127	0.138	0.114	0.168	0.126	0.109	0.117	0.12	0.138	0.121	0.145	0.143	0.127	0.123	0.147	0.125	0.18	0.122	0.134	0.115	0.175
59	0.122	0.13	0.121	0.118	0.146	0.136	0.116	0.124	0.109	0.098	0.124	0.112	0.106	0.131	0.131	0.117		59	0.145	0.142	0.113	0.128	0.137	0.114	0.169	0.126	0.11	0.12	0.121	0.139	0.12	0.144	0.142	0.127	0.122	0.148	0.125	0.182	0.121	0.134	0.115	0.177
59.25	0.12	0.131	0.122	0.118	0.149	0.136	0.116	0.124	0.111	0.097	0.125	0.113	0.105	0.132	0.132	0.118		59.25	0.145	0.143	0.115	0.129	0.138	0.115	0.168	0.126	0.11	0.119	0.121	0.139	0.121	0.143	0.143	0.128	0.122	0.149	0.126	0.182	0.122	0.135	0.118	0.177
59.5	0.123	0.131	0.123	0.119	0.147	0.136	0.117	0.124	0.11	0.098	0.125	0.112	0.107	0.132	0.132	0.118		59.5	0.145	0.144	0.116	0.13	0.138	0.114	0.17	0.126	0.11	0.119	0.122	0.139	0.121	0.144	0.143	0.127	0.123	0.149	0.125	0.182	0.123	0.136	0.116	0.177
59.75	0.124	0.132	0.124	0.119	0.147	0.137	0.117	0.124	0.111	0.099	0.126	0.113	0.108	0.134	0.133	0.118		59.75	0.146	0.144	0.118	0.129	0.14	0.116	0.171	0.127	0.114	0.12	0.123	0.139	0.122	0.146	0.144	0.128	0.125	0.151	0.126	0.183	0.124	0.135	0.119	0.176
60	0.123	0.131	0.123	0.118	0.149	0.137	0.118	0.123	0.113	0.098	0.126	0.113	0.107	0.132	0.132	0.118		60	0.148	0.144	0.116	0.128	0.14	0.116	0.169	0.127	0.111	0.12	0.123	0.141	0.123	0.147	0.145	0.131	0.123	0.151	0.127	0.182	0.124	0.136	0.118	0.179
60.25	0.123	0.134	0.124	0.12	0.149	0.137	0.118	0.126	0.112	0.099	0.126	0.115	0.107	0.133	0.133	0.118		60.25	0.145	0.143	0.115	0.129	0.137	0.114	0.169	0.126	0.11	0.12	0.122	0.139	0.122	0.144	0.146	0.13	0.124	0.151	0.125	0.182	0.124	0.135	0.116	0.178
60.5	0.123	0.129	0.121	0.12	0.147	0.137	0.117	0.126	0.113	0.1	0.127	0.114	0.107	0.135	0.132	0.12		60.5	0.146	0.144	0.114	0.129	0.137	0.114	0.17	0.127	0.111	0.12	0.122	0.138	0.123	0.145	0.144	0.131	0.123	0.148	0.126	0.183	0.123	0.135	0.117	0.178
60.75	0.124	0.134	0.125	0.119	0.151	0.138	0.119	0.126	0.113	0.099	0.126	0.113	0.108	0.135	0.134	0.12		60.75	0.144	0.143	0.116	0.128	0.137	0.115	0.169	0.128	0.111	0.119	0.121	0.139	0.121	0.145	0.144	0.13	0.124	0.15	0.125	0.181	0.123	0.136	0.117	0.179
61	0.122	0.133	0.124	0.12	0.15	0.139	0.119	0.127	0.114	0.1	0.127	0.115	0.108	0.136	0.134	0.121		61	0.144	0.143	0.116	0.129	0.137	0.114	0.17	0.127	0.11	0.119	0.121	0.139	0.121	0.146	0.143	0.129	0.123	0.152	0.123	0.181	0.122	0.136	0.117	0.18
61.25	0.122	0.131	0.124	0.121	0.148	0.139	0.118	0.128	0.113	0.101	0.126	0.116	0.108	0.137	0.133	0.121		61.25	0.145	0.144	0.116	0.129	0.137	0.114	0.169	0.127	0.109	0.119	0.121	0.139	0.122	0.146	0.145	0.131	0.126	0.151	0.124	0.18	0.122	0.136	0.117	0.179
61.5	0.124	0.135	0.125	0.121	0.151	0.14	0.12	0.127	0.112	0.1	0.127	0.114	0.109	0.137	0.136	0.121		61.5	0.145	0.144	0.116	0.13	0.136	0.113	0.17	0.127	0.11	0.12	0.121	0.138	0.123	0.145	0.146	0.131	0.125	0.149	0.124	0.181	0.123	0.135	0.117	0.18
61.75	0.123	0.135	0.126	0.122	0.151	0.14	0.119	0.129	0.113	0.101	0.128	0.117	0.108	0.138	0.135	0.122		61.75	0.144	0.143	0.116	0.131	0.135	0.114	0.17	0.128	0.109	0.12	0.122	0.137	0.122	0.145	0.146	0.131	0.123	0.152	0.123	0.181	0.124	0.137	0.117	0.18
62	0.124	0.133	0.125	0.122	0.149	0.141	0.119	0.128	0.112	0.1	0.127	0.117	0.11	0.138	0.136	0.121		62	0.144	0.144	0.116	0.13	0.136	0.114	0.17	0.127	0.109	0.119	0.123	0.139	0.123	0.147	0.146	0.132	0.124	0.153	0.124	0.18	0.125	0.138	0.119	0.18
62.25	0.124	0.133	0.125	0.121	0.15	0.139	0.12	0.129	0.115	0.101	0.128	0.116	0.111	0.139	0.135	0.122		62.25	0.146	0.145	0.119	0.131	0.14	0.116	0.169	0.127	0.111	0.122	0.123	0.143	0.123	0.148	0.147	0.133	0.127	0.154	0.124	0.183	0.125	0.139	0.12	0.184
62.5	0.124	0.132	0.124	0.121	0.149	0.14	0.119	0.127	0.114	0.102	0.129	0.118	0.111	0.138	0.135	0.122		62.5	0.145	0.144	0.118	0.132	0.139	0.116	0.171	0.129	0.112	0.121	0.125	0.14	0.123	0.148	0.146	0.132	0.127	0.155	0.125	0.182	0.127	0.139	0.119	0.184
62.75	0.124	0.133	0.127	0.122	0.151	0.139	0.12	0.127	0.114	0.101	0.129	0.117	0.111	0.137	0.136	0.122		62.75	0.148	0.147	0.12	0.131	0.14	0.118	0.171	0.129	0.113	0.123	0.124	0.143	0.125	0.15	0.147	0.133	0.128	0.154	0.126	0.184	0.127	0.141	0.12	0.185
63	0.126	0.132	0.127	0.122	0.151	0.141	0.121	0.129	0.114	0.101	0.129	0.117	0.112	0.139	0.137	0.123		63	0.148	0.147	0.119	0.133	0.142	0.118	0.173	0.13	0.113	0.123	0.125	0.145	0.126	0.15	0.149	0.135	0.128	0.157	0.13	0.187	0.127	0.14	0.122	0.187
63.25	0.125	0.133	0.126	0.121	0.151	0.14	0.119	0.129	0.115	0.102	0.129	0.119	0.113	0.14	0.138	0.123		63.25	0.149	0.149	0.12	0.132	0.141	0.118	0.173	0.131	0.112	0.123	0.127	0.144	0.126	0.15	0.15	0.134	0.13	0.157	0.13	0.189	0.128	0.141	0.123	0.187
63.5	0.125	0.134	0.127	0.122	0.151	0.139	0.121	0.129	0.116	0.101	0.129	0.118	0.114	0.14	0.137	0.123		63.5	0.149	0.15	0.117	0.133	0.141	0.119	0.176	0.133	0.113	0.122	0.125	0.143	0.127	0.152	0.149	0.134	0.129	0.158	0.131	0.19	0.127	0.142	0.123	0.188
63.75	0.127	0.133	0.126	0.123	0.15	0.139	0.119	0.129	0.116	0.103	0.129	0.118	0.115	0.141	0.137	0.124		63.75	0.152	0.15	0.12	0.134	0.143	0.12	0.175	0.133	0.114	0.123	0.128	0.145	0.129	0.154	0.149	0.135	0.13	0.159	0.132	0.19	0.129	0.142	0.124	0.189
64	0.125	0.133	0.125	0.12	0.152	0.139	0.12	0.129	0.117	0.104	0.13	0.119	0.113	0.139	0.138	0.123		64	0.151	0.151	0.122	0.136	0.142	0.12	0.176	0.132	0.117	0.124	0.127	0.145	0.128	0.153	0.15	0.137	0.13	0.16	0.133	0.191	0.13	0.144	0.124	0.19
64.25	0.128	0.133	0.126	0.122	0.151	0.14	0.121	0.129	0.117	0.104	0.129	0.118	0.115	0.14	0.138	0.124		64.25	0.151	0.15	0.123	0.136	0.146	0.12	0.177	0.132	0.118	0.126	0.13	0.147	0.13	0.154	0.151	0.137	0.13	0.161	0.133	0.192	0.13	0.144	0.125	0.191
64.5	0.127	0.134	0.127	0.121	0.152	0.142	0.119	0.128	0.117	0.103	0.129	0.119	0.115	0.141	0.138	0.124		64.5	0.153	0.153	0.123	0.138	0.147	0.122	0.177	0.134	0.118	0.126	0.131	0.149	0.131	0.156	0.152	0.137	0.133	0.162	0.135	0.195	0.132	0.144	0.126	0.193
64.75	0.128	0.133	0.127	0.121	0.15	0.141	0.12	0.129	0.118	0.104	0.131	0.121	0.115	0.142	0.138	0.123		64.75	0.154	0.152	0.123	0.137	0.147	0.121	0.177	0.133	0.119	0.125	0.13	0.149	0.13	0.156	0.151	0.138	0.132	0.162	0.135	0.195	0.131	0.146	0.126	0.194
65	0.127	0.136	0.128	0.122	0.153	0.142	0.123	0.13	0.118	0.105	0.131	0.12	0.116	0.143	0.14	0.126		65	0.154	0.153	0.125	0.138	0.148	0.123	0.178	0.134	0.119	0.126	0.13	0.149	0.131	0.155	0.151	0.138	0.132	0.164	0.135	0.194	0.132	0.146	0.127	0.194
65.25	0.127	0.135	0.129	0.123	0.153	0.142	0.122	0.129	0.117	0.105	0.132	0.119	0.115	0.143	0.141	0.125		65.25	0.155	0.153	0.124	0.138	0.148	0.124	0.178	0.134	0.119	0.126	0.131	0.15	0.13	0.156	0.151	0.14	0.133	0.164	0.138	0.195	0.131	0.146	0.127	0.195
65.5	0.127	0.137	0.128	0.122	0.152	0.143	0.123	0.13	0.12	0.105	0.13	0.12	0.118	0.144	0.141	0.126		65.5	0.155	0.153	0.125	0.139	0.148	0.124	0.178	0.135	0.121	0.127	0.132	0.152	0.131	0.156	0.153	0.14	0.135	0.165	0.136	0.196	0.134	0.147	0.128	0.197
65.75	0.127	0.134	0.128	0.122	0.152	0.143	0.121	0.129	0.117	0.105	0.131	0.12	0.116	0.143	0.141	0.125		65.75	0.155	0.153	0.127	0.138	0.149	0.125	0.178	0.135	0.122	0.127	0.132	0.152	0.131	0.157	0.154	0.141	0.135	0.167	0.136	0.197	0.133	0.147	0.128	0.197
66	0.126	0.135	0.129	0.123	0.152	0.142	0.122	0.131	0.119	0.105	0.133	0.121	0.116	0.143	0.141	0.126		66	0.156	0.154	0.124	0.139	0.146	0.124	0.179	0.135	0.119	0.126	0.133	0.151	0.132	0.16	0.155	0.14	0.134	0.166	0.137	0.198	0.134	0.147	0.128	0.197
66.25	0.126	0.135	0.129	0.122	0.154	0.142	0.123	0.13	0.118	0.105	0.132	0.121	0.117	0.145	0.142	0.125		66.25	0.153	0.152	0.123	0.138	0.146	0.123	0.179	0.135	0.118	0.128	0.133	0.151	0.131	0.158	0.154	0.139	0.134	0.165	0.134	0.195	0.133	0.147	0.128	0.198
66.5	0.127	0.137	0.13	0.124	0.156	0.144	0.124	0.132	0.119	0.106	0.132	0.121	0.119	0.146	0.142	0.127		66.5	0.154	0.155	0.126	0.139	0.146	0.122	0.18	0.134	0.119	0.128	0.132	0.15	0.132	0.158	0.155	0.141	0.135	0.164	0.134	0.194	0.134	0.148	0.128	0.196
66.75	0.127	0.138	0.13	0.124	0.153	0.144	0.125	0.132	0.12	0.106	0.131	0.121	0.117	0.145	0.143	0.128		66.75	0.154	0.153	0.125	0.139	0.144	0.124	0.179	0.135	0.117	0.126	0.132	0.151	0.132	0.158	0.155	0.141	0.134	0.165	0.136	0.196	0.134	0.148	0.128	0.196
67	0.126	0.137	0.129	0.125	0.156	0.143	0.124	0.133	0.12	0.105	0.133	0.122	0.118	0.148	0.144	0.129		67	0.153	0.153	0.123	0.138	0.146	0.123	0.179	0.134	0.116	0.126	0.133	0.151	0.132	0.157	0.154	0.141	0.134	0.165	0.133	0.194	0.133	0.147	0.129	0.198
67.25	0.127	0.137	0.13	0.126	0.157	0.146	0.125	0.134	0.12	0.105	0.133	0.123	0.117	0.147	0.143	0.129		67.25	0.153	0.153	0.123	0.138	0.146	0.121	0.18	0.135	0.116	0.127	0.132	0.149	0.133	0.159	0.154	0.141	0.135	0.166	0.133	0.193	0.132	0.146	0.128	0.198
67.5	0.127	0.138	0.13	0.127	0.156	0.145	0.125	0.134	0.121	0.105	0.134	0.123	0.119	0.149	0.144	0.13		67.5	0.153	0.152	0.124	0.139	0.145	0.122	0.178	0.134	0.118	0.128	0.132	0.147	0.133	0.157	0.155	0.141	0.136	0.165	0.133	0.194	0.134	0.148	0.126	0.198
67.75	0.127	0.136	0.13	0.126	0.153	0.146	0.125	0.134	0.121	0.107	0.133	0.122	0.118	0.149	0.143	0.131		67.75	0.153	0.152	0.125	0.139	0.146	0.123	0.178	0.133	0.118	0.129	0.132	0.15	0.133	0.158	0.155	0.142	0.135	0.167	0.133	0.194	0.135	0.149	0.128	0.198
68	0.128	0.139	0.13	0.126	0.157	0.144	0.124	0.135	0.12	0.107	0.133	0.122	0.12	0.15	0.145	0.131		68	0.152	0.152	0.127	0.14	0.148	0.126	0.178	0.135	0.121	0.13	0.133	0.153	0.133	0.158	0.155	0.142	0.137	0.169	0.133	0.193	0.135	0.15	0.13	0.203
68.25	0.128	0.139	0.132	0.126	0.158	0.146	0.125	0.135	0.122	0.107	0.133	0.123	0.121	0.15	0.146	0.132		68.25	0.154	0.155	0.127	0.141	0.15	0.127	0.179	0.137	0.121	0.129	0.135	0.154	0.134	0.16	0.157	0.143	0.138	0.17	0.135	0.196	0.136	0.15	0.132	0.204
68.5	0.128	0.138	0.131	0.126	0.157	0.147	0.126	0.134	0.121	0.107	0.134	0.125	0.121	0.15	0.145	0.131		68.5	0.156	0.155	0.128	0.142	0.15	0.126	0.181	0.135	0.123	0.128	0.136	0.152	0.135	0.161	0.156	0.146	0.139	0.171	0.136	0.197	0.138	0.151	0.131	0.203
68.75	0.129	0.139	0.134	0.125	0.158	0.147	0.126	0.135	0.122	0.108	0.133	0.125	0.12	0.15	0.147	0.132		68.75	0.157	0.157	0.129	0.142	0.15	0.127	0.182	0.137	0.122	0.13	0.137	0.155	0.135	0.163	0.159	0.146	0.138	0.17	0.138	0.2	0.138	0.152	0.132	0.205
69	0.13	0.138	0.13	0.126	0.159	0.147	0.126	0.135	0.123	0.108	0.134	0.125	0.123	0.152	0.146	0.133		69	0.159	0.158	0.128	0.143	0.152	0.128	0.183	0.138	0.122	0.131	0.137	0.156	0.136	0.162	0.158	0.147	0.14	0.173	0.139	0.202	0.139	0.152	0.132	0.206
69.25	0.129	0.139	0.134	0.127	0.157	0.148	0.127	0.136	0.124	0.109	0.134	0.124	0.122	0.153	0.148	0.134		69.25	0.159	0.157	0.13	0.144	0.152	0.129	0.182	0.139	0.124	0.132	0.137	0.155	0.137	0.163	0.159	0.146	0.14	0.175	0.139	0.202	0.138	0.153	0.134	0.207
69.5	0.13	0.14	0.133	0.127	0.16	0.148	0.127	0.137	0.123	0.109	0.135	0.125	0.123	0.154	0.147	0.133		69.5	0.16	0.16	0.128	0.144	0.152	0.129	0.185	0.139	0.123	0.131	0.138	0.155	0.138	0.165	0.158	0.146	0.142	0.173	0.142	0.206	0.138	0.153	0.133	0.208
69.75	0.129	0.139	0.134	0.127	0.161	0.15	0.127	0.136	0.124	0.11	0.134	0.126	0.123	0.153	0.148	0.132		69.75	0.161	0.161	0.13	0.146	0.153	0.13	0.186	0.139	0.125	0.133	0.139	0.157	0.139	0.164	0.16	0.147	0.142	0.176	0.142	0.205	0.14	0.155	0.136	0.209
70	0.132	0.14	0.135	0.127	0.16	0.149	0.127	0.135	0.125	0.11	0.136	0.125	0.124	0.163	0.148	0.132		70	0.161	0.16	0.133	0.146	0.155	0.131	0.186	0.14	0.126	0.132	0.141	0.159	0.138	0.166	0.161	0.149	0.142	0.178	0.144	0.205	0.142	0.154	0.136	0.211
70.25	0.131	0.138	0.135	0.126	0.157	0.148	0.128	0.135	0.123	0.112	0.135	0.126	0.126	0.163	0.148	0.133		70.25	0.162	0.161	0.134	0.146	0.156	0.131	0.186	0.142	0.126	0.134	0.14	0.161	0.141	0.167	0.16	0.149	0.142	0.178	0.145	0.206	0.141	0.156	0.137	0.211
70.5	0.13	0.142	0.135	0.127	0.162	0.147	0.128	0.138	0.126	0.11	0.136	0.127	0.125	0.16	0.151	0.135		70.5	0.162	0.162	0.134	0.147	0.157	0.132	0.186	0.141	0.128	0.133	0.141	0.16	0.141	0.166	0.162	0.148	0.144	0.179	0.145	0.207	0.143	0.156	0.137	0.213
70.75	0.131	0.14	0.135	0.127	0.16	0.148	0.128	0.137	0.125	0.112	0.135	0.128	0.125	0.162	0.151	0.133		70.75	0.164	0.163	0.135	0.148	0.156	0.132	0.187	0.142	0.129	0.135	0.141	0.16	0.142	0.168	0.161	0.15	0.144	0.179	0.146	0.21	0.142	0.158	0.137	0.213
71	0.132	0.141	0.136	0.13	0.161	0.148	0.128	0.141	0.127	0.111	0.137	0.126	0.128	0.163	0.151	0.135		71	0.164	0.163	0.133	0.148	0.156	0.132	0.188	0.142	0.127	0.135	0.143	0.16	0.14	0.168	0.163	0.15	0.143	0.179	0.147	0.209	0.143	0.157	0.138	0.215
71.25	0.131	0.139	0.136	0.13	0.159	0.15	0.127	0.14	0.127	0.112	0.136	0.128	0.127	0.166	0.152	0.137		71.25	0.165	0.163	0.135	0.149	0.158	0.132	0.188	0.143	0.128	0.134	0.142	0.162	0.143	0.169	0.162	0.15	0.145	0.18	0.147	0.209	0.143	0.159	0.139	0.215
71.5	0.132	0.142	0.137	0.131	0.163	0.148	0.131	0.142	0.126	0.112	0.138	0.129	0.127	0.166	0.153	0.138		71.5	0.164	0.164	0.135	0.149	0.158	0.134	0.188	0.143	0.128	0.135	0.144	0.164	0.142	0.168	0.162	0.151	0.145	0.182	0.146	0.21	0.144	0.158	0.14	0.217
71.75	0.132	0.139	0.135	0.13	0.162	0.151	0.128	0.139	0.127	0.113	0.138	0.128	0.128	0.165	0.152	0.137		71.75	0.164	0.164	0.136	0.15	0.158	0.133	0.187	0.143	0.129	0.137	0.143	0.163	0.141	0.169	0.163	0.152	0.146	0.183	0.146	0.21	0.145	0.16	0.14	0.218
72	0.132	0.143	0.136	0.13	0.164	0.151	0.13	0.14	0.128	0.112	0.137	0.128	0.129	0.165	0.153	0.137		72	0.165	0.165	0.135	0.15	0.159	0.134	0.188	0.142	0.129	0.134	0.145	0.162	0.142	0.17	0.162	0.151	0.145	0.182	0.145	0.209	0.145	0.159	0.14	0.216
72.25	0.132	0.141	0.136	0.131	0.162	0.151	0.13	0.141	0.127	0.114	0.136	0.129	0.128	0.166	0.153	0.139		72.25	0.164	0.165	0.134	0.148	0.155	0.133	0.188	0.143	0.126	0.132	0.143	0.16	0.143	0.17	0.163	0.151	0.143	0.182	0.146	0.21	0.143	0.158	0.139	0.217
72.5	0.132	0.143	0.137	0.131	0.165	0.151	0.13	0.143	0.126	0.113	0.139	0.13	0.129	0.167	0.155	0.138		72.5	0.162	0.164	0.135	0.148	0.154	0.131	0.187	0.142	0.126	0.135	0.143	0.16	0.142	0.169	0.164	0.152	0.143	0.182	0.145	0.209	0.144	0.159	0.139	0.216
72.75	0.131	0.14	0.135	0.131	0.162	0.152	0.13	0.141	0.127	0.113	0.139	0.129	0.128	0.167	0.153	0.138		72.75	0.163	0.162	0.135	0.15	0.155	0.133	0.188	0.142	0.129	0.135	0.144	0.16	0.143	0.168	0.164	0.152	0.147	0.183	0.144	0.208	0.143	0.16	0.14	0.218
73	0.133	0.143	0.139	0.13	0.165	0.151	0.132	0.141	0.129	0.115	0.138	0.129	0.131	0.166	0.155	0.139		73	0.163	0.163	0.136	0.149	0.156	0.132	0.187	0.143	0.127	0.136	0.144	0.16	0.143	0.17	0.164	0.155	0.145	0.184	0.144	0.208	0.145	0.16	0.14	0.219
73.25	0.133	0.141	0.136	0.132	0.163	0.154	0.129	0.144	0.129	0.113	0.139	0.13	0.131	0.169	0.154	0.142		73.25	0.163	0.164	0.136	0.149	0.155	0.132	0.189	0.143	0.13	0.135	0.142	0.161	0.144	0.172	0.166	0.153	0.145	0.183	0.144	0.209	0.144	0.161	0.139	0.218
73.5	0.134	0.145	0.139	0.132	0.166	0.152	0.133	0.143	0.129	0.113	0.14	0.131	0.132	0.169	0.156	0.141		73.5	0.164	0.166	0.136	0.15	0.154	0.132	0.188	0.144	0.125	0.137	0.144	0.159	0.143	0.172	0.164	0.154	0.147	0.184	0.146	0.21	0.145	0.16	0.139	0.218
73.75	0.134	0.141	0.138	0.132	0.164	0.152	0.132	0.144	0.13	0.115	0.138	0.131	0.133	0.17	0.155	0.142		73.75	0.163	0.164	0.136	0.15	0.156	0.135	0.189	0.145	0.127	0.137	0.144	0.161	0.142	0.17	0.165	0.155	0.147	0.185	0.145	0.208	0.144	0.16	0.14	0.219
74	0.134	0.145	0.139	0.133	0.168	0.153	0.134	0.144	0.131	0.115	0.141	0.131	0.133	0.171	0.158	0.143		74	0.164	0.165	0.137	0.152	0.158	0.135	0.19	0.145	0.13	0.136	0.146	0.166	0.145	0.171	0.165	0.155	0.148	0.188	0.145	0.21	0.146	0.162	0.143	0.223
74.25	0.133	0.141	0.138	0.135	0.165	0.153	0.131	0.146	0.13	0.117	0.14	0.132	0.132	0.171	0.157	0.144		74.25	0.166	0.166	0.139	0.153	0.16	0.137	0.191	0.145	0.129	0.138	0.147	0.166	0.145	0.172	0.165	0.158	0.148	0.188	0.146	0.212	0.148	0.163	0.144	0.223
74.5	0.135	0.145	0.141	0.134	0.17	0.155	0.133	0.144	0.13	0.116	0.142	0.132	0.134	0.17	0.158	0.143		74.5	0.168	0.168	0.135	0.152	0.158	0.137	0.191	0.146	0.13	0.136	0.147	0.166	0.146	0.175	0.169	0.156	0.149	0.186	0.15	0.214	0.148	0.164	0.143	0.225
74.75	0.135	0.144	0.138	0.133	0.167	0.156	0.132	0.144	0.13	0.116	0.141	0.131	0.134	0.169	0.159	0.142		74.75	0.169	0.169	0.137	0.152	0.159	0.138	0.193	0.148	0.13	0.136	0.148	0.166	0.147	0.176	0.166	0.157	0.15	0.192	0.151	0.216	0.148	0.162	0.144	0.225
75	0.137	0.147	0.14	0.135	0.17	0.154	0.134	0.145	0.132	0.117	0.142	0.132	0.136	0.172	0.159	0.144		75	0.17	0.169	0.139	0.154	0.162	0.139	0.194	0.146	0.133	0.138	0.148	0.167	0.148	0.177	0.169	0.158	0.152	0.192	0.151	0.217	0.149	0.166	0.146	0.226
75.25	0.137	0.144	0.14	0.133	0.167	0.156	0.132	0.145	0.132	0.117	0.142	0.133	0.135	0.17	0.159	0.142		75.25	0.17	0.17	0.141	0.156	0.162	0.138	0.194	0.149	0.134	0.139	0.15	0.168	0.148	0.178	0.169	0.16	0.152	0.193	0.151	0.218	0.151	0.169	0.146	0.228
75.5	0.136	0.145	0.14	0.134	0.168	0.156	0.134	0.146	0.133	0.119	0.142	0.135	0.136	0.173	0.16	0.144		75.5	0.171	0.171	0.142	0.156	0.163	0.14	0.194	0.149	0.134	0.139	0.15	0.169	0.15	0.179	0.17	0.16	0.152	0.193	0.153	0.22	0.152	0.166	0.147	0.229
75.75	0.137	0.143	0.138	0.135	0.167	0.155	0.133	0.148	0.131	0.119	0.142	0.137	0.137	0.174	0.158	0.146		75.75	0.172	0.172	0.142	0.156	0.162	0.139	0.196	0.149	0.136	0.14	0.15	0.169	0.149	0.179	0.171	0.161	0.151	0.193	0.155	0.221	0.151	0.168	0.147	0.23
76	0.138	0.147	0.141	0.135	0.17	0.155	0.135	0.148	0.133	0.12	0.143	0.135	0.139	0.174	0.16	0.147		76	0.172	0.173	0.145	0.158	0.165	0.141	0.196	0.149	0.137	0.142	0.152	0.171	0.151	0.18	0.171	0.161	0.153	0.196	0.156	0.22	0.154	0.169	0.148	0.233
76.25	0.136	0.144	0.14	0.135	0.167	0.156	0.133	0.147	0.134	0.12	0.143	0.135	0.137	0.173	0.16	0.145		76.25	0.173	0.174	0.145	0.159	0.168	0.143	0.199	0.151	0.139	0.142	0.154	0.173	0.152	0.182	0.173	0.16	0.154	0.198	0.157	0.224	0.153	0.17	0.151	0.234
76.5	0.138	0.146	0.141	0.136	0.17	0.156	0.134	0.149	0.135	0.121	0.145	0.135	0.138	0.175	0.161	0.147		76.5	0.175	0.174	0.143	0.157	0.166	0.141	0.199	0.152	0.136	0.14	0.153	0.172	0.153	0.182	0.173	0.161	0.154	0.198	0.159	0.226	0.153	0.169	0.15	0.234
76.75	0.138	0.145	0.141	0.136	0.17	0.157	0.134	0.149	0.136	0.119	0.145	0.136	0.138	0.176	0.16	0.148		76.75	0.175	0.174	0.145	0.16	0.168	0.143	0.196	0.152	0.139	0.143	0.154	0.173	0.153	0.181	0.171	0.162	0.156	0.198	0.157	0.224	0.154	0.17	0.152	0.236
77	0.139	0.147	0.141	0.136	0.171	0.158	0.136	0.148	0.134	0.121	0.145	0.137	0.139	0.176	0.163	0.148		77	0.176	0.175	0.144	0.16	0.167	0.143	0.198	0.152	0.137	0.142	0.155	0.175	0.154	0.181	0.172	0.164	0.157	0.198	0.158	0.226	0.154	0.171	0.152	0.236
77.25	0.141	0.145	0.14	0.136	0.168	0.159	0.134	0.149	0.135	0.12	0.145	0.138	0.14	0.177	0.162	0.148		77.25	0.176	0.176	0.145	0.159	0.167	0.145	0.199	0.152	0.136	0.142	0.154	0.175	0.155	0.183	0.174	0.164	0.156	0.201	0.16	0.227	0.154	0.171	0.152	0.237
77.5	0.14	0.148	0.141	0.135	0.172	0.158	0.137	0.149	0.136	0.121	0.146	0.136	0.142	0.176	0.162	0.147		77.5	0.175	0.175	0.146	0.16	0.169	0.144	0.197	0.152	0.139	0.143	0.156	0.175	0.154	0.181	0.175	0.164	0.157	0.202	0.157	0.224	0.155	0.173	0.153	0.239
77.75	0.139	0.148	0.141	0.138	0.172	0.158	0.136	0.151	0.137	0.123	0.145	0.137	0.141	0.178	0.165	0.149		77.75	0.175	0.176	0.145	0.16	0.169	0.144	0.198	0.151	0.137	0.144	0.155	0.172	0.154	0.182	0.173	0.164	0.156	0.2	0.158	0.226	0.156	0.173	0.151	0.239
78	0.141	0.147	0.142	0.139	0.174	0.158	0.138	0.151	0.137	0.121	0.146	0.14	0.143	0.178	0.165	0.15		78	0.176	0.175	0.143	0.16	0.167	0.142	0.2	0.153	0.136	0.143	0.156	0.172	0.155	0.184	0.176	0.164	0.156	0.2	0.159	0.226	0.154	0.172	0.151	0.238
78.25	0.14	0.146	0.141	0.139	0.172	0.159	0.137	0.151	0.137	0.122	0.146	0.139	0.141	0.18	0.163	0.15		78.25	0.174	0.176	0.144	0.16	0.166	0.142	0.198	0.151	0.136	0.142	0.155	0.174	0.154	0.182	0.173	0.167	0.155	0.2	0.155	0.224	0.155	0.172	0.152	0.239
78.5	0.142	0.146	0.144	0.139	0.174	0.159	0.138	0.151	0.137	0.123	0.147	0.14	0.143	0.179	0.164	0.15		78.5	0.174	0.176	0.145	0.16	0.166	0.144	0.198	0.151	0.136	0.143	0.156	0.173	0.153	0.183	0.176	0.167	0.157	0.202	0.156	0.224	0.156	0.171	0.153	0.24
78.75	0.141	0.146	0.142	0.138	0.174	0.16	0.137	0.151	0.137	0.123	0.148	0.138	0.144	0.18	0.164	0.15		78.75	0.174	0.175	0.145	0.159	0.166	0.144	0.199	0.151	0.134	0.142	0.156	0.172	0.154	0.184	0.175	0.166	0.156	0.2	0.155	0.225	0.155	0.173	0.151	0.239
79	0.141	0.149	0.142	0.137	0.176	0.162	0.138	0.151	0.138	0.123	0.147	0.14	0.145	0.18	0.167	0.152		79	0.174	0.175	0.144	0.159	0.164	0.142	0.198	0.153	0.134	0.142	0.155	0.172	0.154	0.184	0.175	0.168	0.157	0.202	0.156	0.224	0.155	0.173	0.151	0.239
79.25	0.141	0.148	0.142	0.14	0.173	0.162	0.139	0.155	0.138	0.126	0.147	0.14	0.143	0.184	0.167	0.154		79.25	0.176	0.176	0.145	0.161	0.166	0.143	0.201	0.153	0.138	0.143	0.156	0.173	0.154	0.186	0.177	0.167	0.158	0.203	0.158	0.225	0.156	0.176	0.154	0.241
79.5	0.142	0.15	0.144	0.139	0.176	0.16	0.139	0.153	0.139	0.125	0.146	0.142	0.146	0.183	0.168	0.153		79.5	0.176	0.177	0.145	0.161	0.168	0.144	0.201	0.154	0.136	0.143	0.158	0.177	0.156	0.187	0.173	0.168	0.158	0.203	0.157	0.227	0.157	0.175	0.155	0.243
79.75	0.141	0.15	0.145	0.14	0.177	0.162	0.14	0.153	0.14	0.126	0.148	0.141	0.145	0.184	0.168	0.154		79.75	0.175	0.176	0.148	0.163	0.17	0.147	0.201	0.154	0.14	0.146	0.158	0.177	0.155	0.186	0.177	0.168	0.159	0.206	0.156	0.227	0.159	0.177	0.157	0.245
80	0.144	0.148	0.144	0.14	0.176	0.163	0.139	0.155	0.14	0.126	0.149	0.142	0.146	0.184	0.167	0.155		80	0.176	0.178	0.148	0.164	0.17	0.147	0.2	0.153	0.139	0.145	0.158	0.177	0.156	0.187	0.176	0.169	0.161	0.206	0.158	0.227	0.158	0.176	0.157	0.247
80.25	0.142	0.149	0.144	0.142	0.176	0.164	0.141	0.156	0.142	0.127	0.149	0.143	0.146	0.184	0.168	0.155		80.25	0.178	0.179	0.148	0.165	0.171	0.147	0.202	0.154	0.138	0.148	0.161	0.179	0.157	0.187	0.178	0.172	0.161	0.208	0.159	0.23	0.158	0.177	0.158	0.247
80.5	0.144	0.151	0.146	0.141	0.177	0.163	0.141	0.157	0.141	0.126	0.15	0.142	0.148	0.185	0.169	0.156		80.5	0.178	0.179	0.15	0.164	0.17	0.147	0.202	0.156	0.141	0.146	0.16	0.179	0.158	0.188	0.179	0.172	0.163	0.207	0.163	0.233	0.16	0.178	0.157	0.248
80.75	0.143	0.149	0.144	0.141	0.176	0.164	0.14	0.154	0.14	0.128	0.15	0.143	0.148	0.186	0.169	0.156		80.75	0.179	0.18	0.151	0.166	0.172	0.15	0.205	0.156	0.142	0.148	0.161	0.181	0.159	0.189	0.18	0.171	0.163	0.209	0.163	0.233	0.162	0.179	0.159	0.25
81	0.144	0.151	0.146	0.141	0.178	0.165	0.142	0.156	0.142	0.126	0.15	0.146	0.149	0.188	0.171	0.156		81	0.181	0.181	0.151	0.166	0.173	0.15	0.204	0.156	0.144	0.148	0.162	0.183	0.159	0.191	0.18	0.172	0.164	0.21	0.163	0.233	0.162	0.181	0.16	0.251
81.25	0.143	0.15	0.145	0.143	0.178	0.164	0.142	0.156	0.142	0.128	0.152	0.145	0.149	0.188	0.17	0.157		81.25	0.182	0.182	0.155	0.169	0.175	0.15	0.205	0.159	0.146	0.148	0.164	0.182	0.161	0.191	0.18	0.173	0.164	0.211	0.166	0.236	0.163	0.182	0.161	0.253
81.5	0.144	0.152	0.147	0.143	0.181	0.165	0.143	0.156	0.143	0.129	0.151	0.143	0.151	0.189	0.172	0.158		81.5	0.184	0.186	0.153	0.169	0.176	0.153	0.206	0.157	0.145	0.149	0.165	0.185	0.162	0.192	0.18	0.174	0.166	0.214	0.166	0.237	0.164	0.182	0.161	0.254
81.75	0.143	0.154	0.147	0.143	0.181	0.166	0.143	0.155	0.142	0.129	0.152	0.146	0.15	0.186	0.172	0.157		81.75	0.184	0.185	0.154	0.17	0.176	0.152	0.207	0.159	0.146	0.149	0.164	0.183	0.163	0.193	0.182	0.174	0.166	0.215	0.166	0.239	0.164	0.183	0.161	0.255
82	0.145	0.152	0.148	0.144	0.18	0.165	0.143	0.159	0.143	0.129	0.152	0.145	0.151	0.189	0.172	0.159		82	0.184	0.185	0.155	0.17	0.178	0.152	0.207	0.16	0.147	0.15	0.166	0.184	0.162	0.195	0.182	0.175	0.168	0.215	0.169	0.24	0.165	0.184	0.163	0.257
82.25	0.145	0.154	0.149	0.144	0.181	0.167	0.144	0.159	0.145	0.13	0.152	0.145	0.15	0.19	0.173	0.16		82.25	0.184	0.186	0.158	0.172	0.178	0.155	0.209	0.159	0.149	0.151	0.166	0.185	0.163	0.196	0.184	0.176	0.167	0.216	0.168	0.241	0.166	0.185	0.164	0.259
82.5	0.144	0.154	0.149	0.144	0.183	0.166	0.144	0.155	0.144	0.129	0.153	0.146	0.151	0.188	0.175	0.158		82.5	0.185	0.187	0.156	0.172	0.179	0.155	0.207	0.16	0.148	0.15	0.167	0.188	0.163	0.195	0.183	0.178	0.169	0.216	0.169	0.241	0.166	0.186	0.165	0.26
82.75	0.144	0.151	0.147	0.144	0.181	0.167	0.144	0.158	0.143	0.131	0.152	0.146	0.151	0.191	0.174	0.16		82.75	0.186	0.189	0.156	0.171	0.178	0.154	0.209	0.162	0.149	0.152	0.166	0.185	0.164	0.195	0.184	0.176	0.168	0.218	0.169	0.242	0.167	0.186	0.165	0.259
83	0.146	0.154	0.15	0.147	0.183	0.167	0.145	0.16	0.145	0.131	0.154	0.147	0.152	0.193	0.175	0.161		83	0.187	0.188	0.157	0.172	0.182	0.157	0.209	0.162	0.148	0.152	0.17	0.189	0.166	0.197	0.184	0.179	0.17	0.22	0.172	0.243	0.167	0.186	0.167	0.263
83.25	0.145	0.155	0.148	0.145	0.183	0.169	0.145	0.159	0.145	0.132	0.154	0.148	0.152	0.192	0.175	0.161		83.25	0.189	0.188	0.156	0.173	0.178	0.156	0.21	0.162	0.147	0.152	0.169	0.187	0.167	0.197	0.186	0.178	0.17	0.219	0.171	0.245	0.168	0.186	0.166	0.262
83.5	0.148	0.155	0.15	0.145	0.186	0.168	0.145	0.161	0.146	0.132	0.154	0.148	0.154	0.194	0.176	0.162		83.5	0.188	0.189	0.156	0.172	0.177	0.155	0.211	0.16	0.148	0.152	0.167	0.187	0.166	0.197	0.184	0.178	0.168	0.218	0.17	0.243	0.167	0.186	0.165	0.263
83.75	0.146	0.156	0.15	0.146	0.186	0.169	0.146	0.162	0.146	0.133	0.154	0.15	0.155	0.195	0.176	0.162		83.75	0.186	0.187	0.156	0.173	0.177	0.154	0.209	0.16	0.147	0.153	0.168	0.187	0.165	0.195	0.186	0.177	0.169	0.219	0.169	0.242	0.168	0.189	0.165	0.264
84	0.146	0.156	0.151	0.147	0.188	0.17	0.146	0.163	0.147	0.133	0.155	0.148	0.155	0.195	0.178	0.163		84	0.186	0.187	0.157	0.174	0.177	0.156	0.208	0.161	0.15	0.152	0.168	0.187	0.164	0.2	0.185	0.179	0.17	0.219	0.168	0.241	0.167	0.188	0.165	0.262
84.25	0.148	0.157	0.15	0.147	0.187	0.17	0.147	0.162	0.147	0.132	0.155	0.15	0.155	0.197	0.179	0.165		84.25	0.185	0.187	0.158	0.173	0.178	0.155	0.209	0.16	0.148	0.152	0.169	0.186	0.166	0.197	0.186	0.178	0.168	0.219	0.169	0.24	0.169	0.189	0.165	0.263
84.5	0.147	0.158	0.151	0.149	0.188	0.17	0.147	0.162	0.147	0.133	0.156	0.15	0.157	0.197	0.179	0.164		84.5	0.186	0.19	0.156	0.174	0.178	0.155	0.211	0.163	0.147	0.152	0.168	0.187	0.166	0.198	0.186	0.18	0.171	0.221	0.17	0.243	0.169	0.188	0.167	0.263
84.75	0.146	0.156	0.151	0.148	0.186	0.17	0.148	0.164	0.147	0.133	0.156	0.151	0.156	0.197	0.178	0.165		84.75	0.185	0.189	0.157	0.175	0.177	0.154	0.21	0.162	0.147	0.152	0.169	0.188	0.167	0.196	0.186	0.181	0.17	0.221	0.169	0.242	0.17	0.188	0.166	0.265
85	0.148	0.158	0.153	0.149	0.189	0.172	0.149	0.164	0.148	0.134	0.157	0.151	0.158	0.198	0.18	0.166		85	0.185	0.189	0.157	0.173	0.178	0.155	0.211	0.16	0.146	0.152	0.168	0.187	0.166	0.199	0.186	0.182	0.171	0.221	0.169	0.241	0.17	0.188	0.167	0.266
85.25	0.148	0.157	0.152	0.149	0.188	0.172	0.148	0.164	0.148	0.136	0.156	0.152	0.157	0.198	0.18	0.165		85.25	0.186	0.19	0.159	0.175	0.18	0.157	0.21	0.162	0.149	0.153	0.171	0.189	0.167	0.199	0.186	0.182	0.173	0.223	0.169	0.243	0.169	0.189	0.168	0.266
85.5	0.148	0.159	0.153	0.149	0.191	0.172	0.149	0.165	0.15	0.135	0.157	0.152	0.158	0.2	0.181	0.166		85.5	0.188	0.19	0.159	0.175	0.182	0.159	0.212	0.163	0.148	0.152	0.172	0.191	0.169	0.202	0.188	0.182	0.174	0.229	0.171	0.244	0.17	0.191	0.171	0.271
85.75	0.146	0.158	0.152	0.15	0.189	0.174	0.149	0.165	0.148	0.135	0.157	0.154	0.157	0.201	0.182	0.168		85.75	0.188	0.189	0.161	0.177	0.182	0.158	0.212	0.164	0.152	0.155	0.172	0.191	0.168	0.201	0.189	0.184	0.174	0.226	0.171	0.245	0.173	0.193	0.17	0.271
86	0.15	0.16	0.154	0.15	0.191	0.174	0.151	0.166	0.149	0.137	0.158	0.153	0.16	0.201	0.181	0.168		86	0.189	0.191	0.161	0.178	0.183	0.16	0.213	0.165	0.151	0.156	0.173	0.193	0.171	0.204	0.191	0.184	0.175	0.228	0.173	0.248	0.172	0.194	0.172	0.274
86.25	0.149	0.159	0.153	0.151	0.189	0.175	0.15	0.168	0.15	0.136	0.158	0.154	0.162	0.202	0.182	0.169		86.25	0.191	0.192	0.164	0.179	0.183	0.159	0.213	0.165	0.152	0.157	0.173	0.193	0.17	0.203	0.19	0.185	0.175	0.228	0.173	0.25	0.173	0.195	0.172	0.274
86.5	0.15	0.161	0.154	0.152	0.192	0.174	0.151	0.167	0.15	0.138	0.159	0.154	0.163	0.204	0.184	0.169		86.5	0.192	0.194	0.161	0.179	0.185	0.161	0.215	0.166	0.153	0.158	0.175	0.194	0.173	0.204	0.191	0.186	0.177	0.23	0.176	0.25	0.173	0.194	0.175	0.277
86.75	0.149	0.16	0.155	0.15	0.191	0.176	0.15	0.168	0.151	0.138	0.159	0.155	0.163	0.203	0.184	0.169		86.75	0.194	0.195	0.16	0.179	0.184	0.161	0.217	0.167	0.151	0.156	0.175	0.193	0.172	0.205	0.19	0.184	0.175	0.23	0.179	0.253	0.174	0.194	0.174	0.276
87	0.151	0.162	0.156	0.152	0.193	0.175	0.152	0.169	0.152	0.137	0.158	0.155	0.165	0.206	0.185	0.17		87	0.195	0.195	0.165	0.179	0.186	0.162	0.217	0.166	0.155	0.157	0.176	0.195	0.173	0.207	0.193	0.188	0.176	0.23	0.179	0.253	0.176	0.196	0.174	0.278
87.25	0.151	0.161	0.156	0.152	0.19	0.177	0.151	0.168	0.151	0.137	0.159	0.155	0.164	0.207	0.186	0.17		87.25	0.196	0.197	0.166	0.182	0.188	0.164	0.217	0.167	0.157	0.158	0.178	0.197	0.174	0.207	0.194	0.188	0.179	0.235	0.18	0.255	0.177	0.197	0.176	0.281
87.5	0.151	0.163	0.158	0.152	0.194	0.177	0.153	0.169	0.152	0.139	0.161	0.156	0.167	0.208	0.185	0.171		87.5	0.197	0.198	0.163	0.181	0.186	0.163	0.217	0.168	0.155	0.158	0.179	0.196	0.174	0.208	0.193	0.188	0.178	0.232	0.18	0.257	0.175	0.196	0.176	0.279
87.75	0.153	0.161	0.156	0.153	0.193	0.177	0.153	0.169	0.153	0.139	0.161	0.156	0.168	0.208	0.185	0.172		87.75	0.195	0.198	0.167	0.183	0.189	0.164	0.219	0.168	0.157	0.16	0.179	0.196	0.176	0.208	0.194	0.187	0.179	0.234	0.18	0.257	0.178	0.199	0.178	0.281
88	0.152	0.163	0.156	0.152	0.195	0.177	0.153	0.17	0.155	0.141	0.16	0.156	0.17	0.209	0.186	0.173		88	0.197	0.199	0.171	0.184	0.189	0.165	0.221	0.169	0.158	0.16	0.179	0.199	0.176	0.208	0.194	0.19	0.18	0.236	0.183	0.258	0.18	0.201	0.178	0.284
88.25	0.151	0.162	0.157	0.152	0.194	0.178	0.154	0.17	0.154	0.14	0.16	0.157	0.169	0.211	0.187	0.172		88.25	0.198	0.2	0.168	0.185	0.189	0.166	0.221	0.17	0.159	0.161	0.181	0.199	0.177	0.211	0.195	0.19	0.18	0.238	0.183	0.26	0.18	0.202	0.178	0.283
88.5	0.153	0.164	0.157	0.154	0.194	0.179	0.154	0.169	0.155	0.139	0.161	0.157	0.171	0.209	0.187	0.173		88.5	0.199	0.2	0.166	0.185	0.191	0.165	0.221	0.17	0.155	0.159	0.181	0.201	0.18	0.209	0.194	0.189	0.182	0.237	0.184	0.26	0.179	0.199	0.18	0.285
88.75	0.154	0.162	0.158	0.154	0.192	0.178	0.154	0.17	0.155	0.14	0.161	0.157	0.171	0.209	0.187	0.173		88.75	0.198	0.201	0.169	0.184	0.19	0.168	0.222	0.171	0.158	0.161	0.182	0.203	0.18	0.21	0.196	0.19	0.182	0.239	0.184	0.261	0.181	0.202	0.182	0.286
89	0.152	0.163	0.158	0.153	0.195	0.178	0.154	0.171	0.154	0.142	0.161	0.158	0.171	0.21	0.189	0.174		89	0.198	0.198	0.169	0.184	0.19	0.166	0.221	0.17	0.159	0.16	0.181	0.201	0.177	0.21	0.196	0.191	0.181	0.238	0.183	0.26	0.181	0.201	0.18	0.286
89.25	0.154	0.164	0.158	0.154	0.196	0.18	0.154	0.171	0.155	0.143	0.161	0.159	0.172	0.211	0.189	0.174		89.25	0.197	0.201	0.17	0.187	0.189	0.166	0.222	0.169	0.158	0.161	0.181	0.199	0.178	0.21	0.196	0.193	0.18	0.239	0.182	0.259	0.181	0.202	0.179	0.285
89.5	0.155	0.164	0.158	0.153	0.196	0.18	0.153	0.17	0.157	0.142	0.163	0.159	0.171	0.212	0.189	0.175		89.5	0.199	0.201	0.167	0.186	0.19	0.165	0.221	0.17	0.156	0.162	0.18	0.199	0.18	0.213	0.196	0.194	0.181	0.238	0.182	0.261	0.179	0.202	0.179	0.286
89.75	0.154	0.162	0.159	0.155	0.195	0.181	0.155	0.172	0.156	0.142	0.163	0.159	0.174	0.215	0.189	0.177		89.75	0.198	0.202	0.169	0.186	0.188	0.164	0.222	0.17	0.155	0.162	0.181	0.198	0.18	0.211	0.196	0.192	0.18	0.239	0.183	0.261	0.181	0.201	0.179	0.286
90	0.155	0.166	0.16	0.154	0.197	0.181	0.155	0.174	0.157	0.142	0.163	0.159	0.176	0.214	0.19	0.178		90	0.198	0.2	0.169	0.187	0.187	0.164	0.222	0.17	0.156	0.162	0.181	0.199	0.18	0.212	0.197	0.193	0.182	0.239	0.181	0.259	0.181	0.204	0.181	0.287
90.25	0.154	0.163	0.158	0.156	0.195	0.181	0.154	0.175	0.157	0.143	0.163	0.159	0.173	0.215	0.191	0.179		90.25	0.198	0.2	0.171	0.187	0.189	0.165	0.221	0.171	0.157	0.162	0.181	0.2	0.18	0.211	0.197	0.193	0.183	0.241	0.182	0.261	0.182	0.204	0.18	0.29
90.5	0.155	0.166	0.16	0.154	0.199	0.181	0.157	0.172	0.157	0.145	0.163	0.159	0.171	0.214	0.192	0.178		90.5	0.196	0.2	0.17	0.187	0.188	0.167	0.222	0.17	0.158	0.162	0.181	0.2	0.18	0.212	0.196	0.194	0.182	0.243	0.181	0.26	0.182	0.204	0.181	0.288
90.75	0.155	0.164	0.158	0.155	0.196	0.182	0.157	0.175	0.157	0.143	0.165	0.161	0.173	0.216	0.192	0.178		90.75	0.197	0.2	0.171	0.189	0.189	0.166	0.221	0.169	0.16	0.163	0.18	0.199	0.18	0.213	0.198	0.194	0.182	0.242	0.181	0.26	0.184	0.205	0.181	0.29
91	0.155	0.166	0.16	0.155	0.198	0.181	0.159	0.174	0.157	0.144	0.166	0.159	0.175	0.216	0.192	0.179		91	0.198	0.202	0.172	0.19	0.193	0.17	0.222	0.169	0.16	0.164	0.185	0.203	0.179	0.213	0.199	0.197	0.185	0.245	0.181	0.261	0.185	0.206	0.185	0.294
91.25	0.156	0.164	0.158	0.155	0.196	0.182	0.156	0.174	0.159	0.144	0.166	0.16	0.173	0.217	0.193	0.179		91.25	0.2	0.203	0.171	0.19	0.192	0.17	0.224	0.172	0.162	0.164	0.185	0.204	0.181	0.216	0.198	0.196	0.186	0.244	0.184	0.263	0.186	0.207	0.184	0.294
91.5	0.155	0.168	0.16	0.155	0.2	0.181	0.16	0.174	0.161	0.145	0.165	0.16	0.175	0.217	0.194	0.178		91.5	0.201	0.203	0.17	0.191	0.194	0.17	0.222	0.172	0.16	0.165	0.186	0.205	0.183	0.216	0.2	0.197	0.187	0.246	0.186	0.266	0.186	0.208	0.187	0.296
91.75	0.156	0.167	0.161	0.157	0.199	0.183	0.157	0.176	0.16	0.146	0.165	0.162	0.173	0.218	0.194	0.181		91.75	0.202	0.204	0.171	0.19	0.195	0.172	0.226	0.174	0.16	0.164	0.186	0.205	0.182	0.217	0.2	0.198	0.188	0.248	0.189	0.267	0.186	0.208	0.186	0.298
92	0.155	0.167	0.16	0.157	0.2	0.184	0.158	0.175	0.161	0.147	0.167	0.162	0.174	0.219	0.195	0.181		92	0.202	0.205	0.174	0.192	0.195	0.172	0.226	0.175	0.162	0.165	0.188	0.207	0.184	0.216	0.203	0.2	0.187	0.248	0.188	0.269	0.187	0.21	0.189	0.299
92.25	0.158	0.167	0.16	0.158	0.199	0.182	0.158	0.175	0.161	0.146	0.166	0.163	0.177	0.22	0.195	0.182		92.25	0.204	0.207	0.175	0.193	0.197	0.174	0.227	0.175	0.165	0.166	0.187	0.207	0.185	0.22	0.203	0.201	0.189	0.248	0.191	0.27	0.187	0.212	0.188	0.301
92.5	0.157	0.168	0.164	0.157	0.203	0.182	0.16	0.175	0.161	0.146	0.166	0.163	0.177	0.22	0.195	0.182		92.5	0.206	0.207	0.176	0.194	0.196	0.173	0.23	0.175	0.166	0.167	0.189	0.209	0.186	0.221	0.203	0.199	0.188	0.25	0.191	0.271	0.188	0.211	0.19	0.301
92.75	0.156	0.168	0.163	0.155	0.199	0.184	0.159	0.176	0.162	0.146	0.167	0.164	0.178	0.22	0.196	0.181		92.75	0.206	0.208	0.178	0.194	0.199	0.174	0.229	0.175	0.165	0.168	0.19	0.211	0.186	0.22	0.203	0.201	0.189	0.251	0.191	0.272	0.191	0.213	0.191	0.305
93	0.157	0.167	0.161	0.157	0.201	0.185	0.159	0.176	0.162	0.147	0.169	0.165	0.179	0.221	0.198	0.184		93	0.207	0.209	0.176	0.194	0.199	0.176	0.228	0.177	0.164	0.168	0.191	0.211	0.188	0.221	0.203	0.202	0.192	0.253	0.192	0.273	0.189	0.213	0.192	0.305
93.25	0.157	0.169	0.164	0.156	0.202	0.184	0.158	0.174	0.163	0.148	0.169	0.166	0.177	0.22	0.198	0.183		93.25	0.208	0.211	0.177	0.196	0.201	0.176	0.232	0.176	0.166	0.168	0.191	0.212	0.19	0.223	0.204	0.203	0.192	0.256	0.194	0.275	0.191	0.212	0.192	0.307
93.5	0.159	0.168	0.162	0.157	0.201	0.185	0.16	0.177	0.165	0.147	0.17	0.164	0.181	0.221	0.198	0.184		93.5	0.21	0.212	0.178	0.195	0.201	0.177	0.233	0.178	0.166	0.167	0.192	0.213	0.191	0.221	0.204	0.204	0.193	0.257	0.196	0.277	0.192	0.215	0.193	0.307
93.75	0.157	0.167	0.163	0.157	0.201	0.185	0.159	0.178	0.164	0.149	0.169	0.166	0.18	0.223	0.198	0.186		93.75	0.21	0.212	0.181	0.198	0.201	0.178	0.233	0.178	0.168	0.171	0.193	0.215	0.19	0.226	0.205	0.204	0.193	0.256	0.197	0.277	0.193	0.215	0.194	0.309
94	0.158	0.168	0.163	0.157	0.201	0.185	0.159	0.178	0.163	0.149	0.17	0.167	0.182	0.222	0.199	0.186		94	0.209	0.213	0.182	0.198	0.2	0.177	0.231	0.179	0.17	0.171	0.192	0.214	0.192	0.226	0.205	0.204	0.193	0.255	0.197	0.279	0.194	0.217	0.195	0.309
94.25	0.158	0.168	0.163	0.157	0.2	0.187	0.16	0.176	0.164	0.149	0.17	0.167	0.181	0.221	0.199	0.186		94.25	0.211	0.211	0.183	0.2	0.202	0.18	0.231	0.178	0.171	0.17	0.196	0.215	0.191	0.225	0.206	0.205	0.195	0.258	0.196	0.278	0.195	0.218	0.196	0.31
94.5	0.159	0.168	0.163	0.158	0.202	0.185	0.16	0.177	0.164	0.15	0.171	0.167	0.182	0.224	0.201	0.186		94.5	0.212	0.214	0.183	0.2	0.204	0.18	0.233	0.181	0.171	0.173	0.196	0.216	0.192	0.226	0.208	0.207	0.195	0.261	0.198	0.281	0.195	0.219	0.197	0.313
94.75	0.158	0.168	0.161	0.157	0.2	0.186	0.159	0.176	0.165	0.151	0.17	0.166	0.182	0.223	0.2	0.185		94.75	0.213	0.214	0.181	0.2	0.202	0.18	0.234	0.181	0.17	0.171	0.195	0.215	0.193	0.226	0.207	0.207	0.195	0.258	0.198	0.28	0.196	0.218	0.196	0.311
95	0.16	0.17	0.164	0.159	0.204	0.187	0.162	0.178	0.166	0.151	0.17	0.167	0.182	0.225	0.201	0.187		95	0.212	0.215	0.179	0.198	0.203	0.178	0.234	0.18	0.167	0.169	0.196	0.214	0.193	0.227	0.207	0.206	0.194	0.259	0.199	0.28	0.194	0.217	0.196	0.313
95.25	0.16	0.167	0.161	0.16	0.201	0.187	0.162	0.178	0.166	0.151	0.17	0.167	0.185	0.226	0.201	0.188		95.25	0.211	0.215	0.182	0.199	0.202	0.179	0.233	0.181	0.169	0.171	0.195	0.213	0.192	0.227	0.208	0.206	0.195	0.26	0.198	0.28	0.195	0.218	0.197	0.312
95.5	0.16	0.17	0.162	0.159	0.201	0.186	0.161	0.179	0.167	0.15	0.171	0.167	0.185	0.227	0.202	0.188		95.5	0.211	0.212	0.182	0.199	0.202	0.179	0.233	0.18	0.169	0.171	0.196	0.214	0.192	0.227	0.208	0.209	0.194	0.26	0.196	0.278	0.195	0.218	0.196	0.313
95.75	0.159	0.168	0.164	0.16	0.202	0.188	0.161	0.178	0.166	0.151	0.171	0.168	0.182	0.226	0.203	0.188		95.75	0.212	0.214	0.182	0.2	0.201	0.177	0.235	0.18	0.169	0.172	0.196	0.215	0.193	0.227	0.208	0.208	0.195	0.261	0.196	0.279	0.196	0.219	0.198	0.314
96	0.159	0.169	0.161	0.16	0.202	0.187	0.16	0.181	0.168	0.152	0.173	0.168	0.184	0.227	0.202	0.189		96	0.211	0.215	0.181	0.2	0.2	0.178	0.235	0.18	0.169	0.172	0.196	0.216	0.193	0.23	0.21	0.209	0.197	0.262	0.198	0.281	0.196	0.22	0.196	0.315
96.25	0.159	0.167	0.162	0.161	0.201	0.188	0.16	0.18	0.166	0.152	0.173	0.168	0.182	0.227	0.202	0.188		96.25	0.213	0.215	0.179	0.2	0.203	0.178	0.235	0.181	0.166	0.171	0.195	0.215	0.194	0.229	0.21	0.208	0.195	0.263	0.199	0.281	0.196	0.22	0.196	0.317
96.5	0.159	0.171	0.166	0.162	0.205	0.188	0.163	0.179	0.169	0.153	0.173	0.169	0.186	0.229	0.204	0.191		96.5	0.212	0.216	0.18	0.199	0.202	0.18	0.235	0.181	0.167	0.171	0.197	0.215	0.194	0.23	0.207	0.209	0.197	0.26	0.199	0.282	0.197	0.22	0.2	0.317
96.75	0.159	0.17	0.163	0.16	0.204	0.188	0.162	0.179	0.168	0.153	0.173	0.171	0.184	0.228	0.204	0.19		96.75	0.212	0.214	0.181	0.198	0.206	0.183	0.233	0.18	0.169	0.17	0.199	0.218	0.193	0.223	0.209	0.208	0.198	0.263	0.195	0.278	0.198	0.224	0.2	0.319
97	0.16	0.171	0.168	0.164	0.204	0.188	0.163	0.182	0.168	0.153	0.176	0.17	0.187	0.23	0.205	0.191		97	0.213	0.216	0.183	0.201	0.207	0.183	0.236	0.181	0.17	0.174	0.199	0.218	0.195	0.225	0.21	0.209	0.199	0.264	0.197	0.28	0.198	0.225	0.204	0.319
97.25	0.159	0.172	0.168	0.163	0.206	0.19	0.165	0.181	0.17	0.154	0.174	0.17	0.186	0.228	0.205	0.191		97.25	0.215	0.217	0.182	0.201	0.208	0.185	0.234	0.182	0.168	0.172	0.201	0.221	0.196	0.225	0.21	0.21	0.199	0.264	0.2	0.282	0.198	0.226	0.204	0.323
97.5	0.159	0.172	0.168	0.163	0.206	0.189	0.164	0.18	0.17	0.153	0.176	0.172	0.185	0.23	0.206	0.192		97.5	0.215	0.218	0.184	0.204	0.209	0.185	0.239	0.182	0.171	0.173	0.2	0.22	0.197	0.227	0.21	0.212	0.2	0.264	0.202	0.285	0.201	0.229	0.204	0.324
97.75	0.159	0.17	0.166	0.163	0.205	0.191	0.163	0.181	0.17	0.155	0.176	0.172	0.187	0.229	0.205	0.191		97.75	0.218	0.22	0.185	0.203	0.207	0.185	0.24	0.182	0.171	0.174	0.201	0.221	0.197	0.228	0.211	0.211	0.202	0.266	0.203	0.287	0.201	0.228	0.204	0.324
98	0.162	0.173	0.167	0.165	0.207	0.19	0.165	0.183	0.169	0.156	0.177	0.173	0.186	0.232	0.207	0.193		98	0.217	0.22	0.187	0.204	0.207	0.186	0.241	0.184	0.175	0.174	0.204	0.223	0.197	0.231	0.212	0.213	0.201	0.268	0.203	0.287	0.202	0.23	0.206	0.326
98.25	0.161	0.173	0.168	0.163	0.208	0.192	0.164	0.183	0.171	0.157	0.177	0.173	0.188	0.231	0.206	0.193		98.25	0.22	0.221	0.189	0.207	0.211	0.187	0.241	0.185	0.176	0.178	0.204	0.223	0.198	0.232	0.213	0.215	0.203	0.268	0.206	0.29	0.203	0.232	0.207	0.328
98.5	0.162	0.173	0.169	0.165	0.208	0.192	0.165	0.184	0.172	0.157	0.177	0.175	0.19	0.233	0.208	0.195		98.5	0.22	0.222	0.19	0.208	0.212	0.188	0.24	0.188	0.177	0.178	0.205	0.225	0.2	0.233	0.213	0.215	0.203	0.267	0.207	0.291	0.204	0.232	0.209	0.329
98.75	0.161	0.173	0.169	0.163	0.208	0.192	0.167	0.183	0.172	0.157	0.177	0.173	0.187	0.232	0.209	0.193		98.75	0.221	0.224	0.19	0.208	0.211	0.188	0.243	0.186	0.179	0.177	0.204	0.225	0.2	0.234	0.214	0.216	0.203	0.269	0.209	0.293	0.206	0.233	0.208	0.331
99	0.163	0.176	0.169	0.165	0.209	0.191	0.167	0.183	0.172	0.157	0.178	0.175	0.192	0.234	0.21	0.196		99	0.223	0.224	0.189	0.208	0.214	0.189	0.244	0.187	0.175	0.176	0.206	0.226	0.202	0.233	0.214	0.216	0.205	0.271	0.211	0.296	0.206	0.233	0.21	0.333
99.25	0.162	0.171	0.169	0.164	0.206	0.193	0.166	0.183	0.174	0.159	0.179	0.175	0.192	0.233	0.208	0.195		99.25	0.223	0.224	0.192	0.209	0.213	0.19	0.244	0.186	0.179	0.179	0.208	0.226	0.203	0.236	0.214	0.217	0.204	0.27	0.21	0.293	0.206	0.235	0.21	0.333
99.5	0.164	0.175	0.169	0.166	0.211	0.194	0.168	0.188	0.173	0.159	0.18	0.178	0.19	0.236	0.21	0.197		99.5	0.222	0.226	0.192	0.211	0.213	0.19	0.243	0.187	0.18	0.179	0.206	0.227	0.202	0.236	0.215	0.215	0.204	0.271	0.211	0.295	0.208	0.236	0.21	0.333
99.75	0.163	0.175	0.169	0.165	0.21	0.194	0.168	0.187	0.174	0.159	0.181	0.176	0.193	0.237	0.212	0.197		99.75	0.225	0.228	0.194	0.212	0.216	0.193	0.245	0.189	0.182	0.181	0.208	0.23	0.203	0.237	0.216	0.22	0.206	0.274	0.213	0.298	0.208	0.237	0.212	0.335
100	0.165	0.176	0.172	0.165	0.211	0.193	0.168	0.187	0.175	0.159	0.181	0.177	0.193	0.242	0.213	0.198		100	0.224	0.228	0.194	0.212	0.216	0.192	0.245	0.189	0.181	0.181	0.21	0.231	0.204	0.237	0.217	0.22	0.209	0.278	0.214	0.296	0.209	0.238	0.215	0.336
100.25	0.165	0.173	0.167	0.165	0.208	0.195	0.167	0.187	0.176	0.16	0.182	0.177	0.192	0.24	0.213	0.199		100.25	0.226	0.227	0.192	0.212	0.218	0.193	0.246	0.189	0.18	0.179	0.21	0.229	0.204	0.238	0.217	0.22	0.208	0.276	0.214	0.299	0.209	0.236	0.215	0.339
100.5	0.166	0.176	0.171	0.166	0.211	0.195	0.169	0.188	0.175	0.16	0.18	0.179	0.194	0.243	0.214	0.201		100.5	0.224	0.228	0.194	0.211	0.216	0.192	0.244	0.19	0.181	0.181	0.211	0.231	0.205	0.239	0.218	0.22	0.21	0.274	0.213	0.298	0.207	0.237	0.213	0.337
100.75	0.165	0.176	0.172	0.168	0.213	0.196	0.169	0.188	0.175	0.161	0.182	0.18	0.195	0.242	0.213	0.199		100.75	0.224	0.227	0.196	0.214	0.215	0.193	0.243	0.189	0.181	0.181	0.211	0.23	0.205	0.24	0.219	0.221	0.21	0.277	0.212	0.298	0.21	0.24	0.215	0.339
101	0.165	0.175	0.171	0.166	0.212	0.197	0.169	0.188	0.175	0.161	0.185	0.179	0.195	0.243	0.215	0.201		101	0.224	0.228	0.195	0.213	0.216	0.192	0.246	0.19	0.182	0.18	0.21	0.231	0.205	0.239	0.219	0.221	0.21	0.276	0.21	0.297	0.211	0.239	0.214	0.339
101.25	0.166	0.175	0.169	0.168	0.212	0.197	0.169	0.189	0.178	0.164	0.182	0.179	0.194	0.243	0.215	0.201		101.25	0.225	0.227	0.193	0.214	0.215	0.192	0.248	0.189	0.18	0.182	0.21	0.23	0.204	0.238	0.22	0.222	0.209	0.277	0.213	0.299	0.211	0.239	0.216	0.339
101.5	0.167	0.179	0.17	0.17	0.214	0.196	0.171	0.191	0.178	0.164	0.184	0.18	0.198	0.246	0.216	0.202		101.5	0.225	0.228	0.195	0.212	0.217	0.192	0.248	0.19	0.181	0.18	0.211	0.23	0.205	0.238	0.218	0.222	0.211	0.278	0.213	0.298	0.211	0.239	0.214	0.34
101.75	0.167	0.179	0.171	0.168	0.217	0.198	0.172	0.19	0.177	0.164	0.185	0.181	0.199	0.245	0.216	0.202		101.75	0.227	0.23	0.194	0.214	0.214	0.193	0.246	0.191	0.182	0.182	0.209	0.229	0.207	0.241	0.221	0.223	0.211	0.277	0.213	0.3	0.211	0.241	0.215	0.34
102	0.169	0.18	0.172	0.169	0.217	0.198	0.173	0.193	0.178	0.165	0.184	0.181	0.198	0.247	0.217	0.203		102	0.227	0.231	0.195	0.214	0.217	0.194	0.248	0.19	0.181	0.181	0.211	0.231	0.206	0.241	0.221	0.224	0.211	0.278	0.214	0.303	0.21	0.241	0.215	0.345
102.25	0.168	0.181	0.173	0.168	0.217	0.199	0.173	0.19	0.18	0.164	0.185	0.183	0.198	0.245	0.218	0.202		102.25	0.226	0.229	0.196	0.216	0.215	0.194	0.247	0.192	0.181	0.183	0.212	0.23	0.206	0.242	0.221	0.224	0.211	0.278	0.211	0.301	0.212	0.243	0.216	0.343
102.5	0.168	0.18	0.174	0.17	0.217	0.2	0.173	0.193	0.179	0.164	0.186	0.182	0.2	0.248	0.22	0.204		102.5	0.226	0.229	0.195	0.214	0.22	0.197	0.248	0.191	0.181	0.183	0.213	0.232	0.207	0.241	0.222	0.226	0.213	0.283	0.213	0.301	0.214	0.242	0.219	0.346
102.75	0.167	0.178	0.175	0.168	0.214	0.199	0.171	0.192	0.18	0.166	0.186	0.183	0.199	0.246	0.219	0.204		102.75	0.228	0.232	0.196	0.216	0.219	0.197	0.25	0.192	0.182	0.183	0.216	0.234	0.208	0.242	0.222	0.225	0.214	0.283	0.214	0.303	0.214	0.244	0.22	0.348
103	0.168	0.18	0.174	0.171	0.219	0.2	0.174	0.194	0.179	0.165	0.186	0.183	0.199	0.25	0.221	0.207		103	0.228	0.234	0.198	0.217	0.219	0.197	0.251	0.192	0.182	0.183	0.216	0.235	0.209	0.245	0.223	0.226	0.215	0.284	0.217	0.308	0.215	0.246	0.22	0.349
103.25	0.168	0.179	0.174	0.171	0.216	0.201	0.174	0.195	0.181	0.167	0.187	0.185	0.2	0.249	0.221	0.207		103.25	0.229	0.234	0.199	0.219	0.222	0.199	0.251	0.194	0.185	0.185	0.218	0.237	0.211	0.246	0.223	0.228	0.215	0.286	0.217	0.309	0.217	0.245	0.222	0.353
103.5	0.17	0.18	0.174	0.172	0.219	0.201	0.175	0.195	0.182	0.168	0.188	0.185	0.202	0.252	0.222	0.208		103.5	0.231	0.234	0.202	0.22	0.224	0.201	0.253	0.195	0.189	0.187	0.219	0.239	0.211	0.248	0.225	0.229	0.218	0.286	0.219	0.312	0.218	0.248	0.221	0.354
103.75	0.168	0.181	0.175	0.171	0.22	0.203	0.175	0.194	0.183	0.168	0.187	0.183	0.201	0.25	0.222	0.207		103.75	0.233	0.237	0.202	0.221	0.223	0.2	0.253	0.194	0.186	0.187	0.218	0.237	0.212	0.249	0.225	0.23	0.217	0.287	0.222	0.313	0.22	0.248	0.222	0.353
104	0.169	0.183	0.177	0.174	0.222	0.202	0.176	0.197	0.183	0.169	0.188	0.186	0.204	0.253	0.223	0.209		104	0.233	0.236	0.199	0.22	0.225	0.2	0.255	0.197	0.188	0.187	0.218	0.24	0.212	0.247	0.226	0.232	0.216	0.286	0.221	0.316	0.221	0.25	0.223	0.355
104.25	0.168	0.18	0.176	0.175	0.22	0.203	0.176	0.196	0.184	0.17	0.188	0.186	0.202	0.254	0.223	0.209		104.25	0.236	0.238	0.204	0.222	0.226	0.203	0.255	0.197	0.189	0.187	0.221	0.241	0.211	0.25	0.227	0.231	0.219	0.29	0.222	0.313	0.222	0.25	0.226	0.357
104.5	0.171	0.183	0.176	0.177	0.222	0.203	0.177	0.198	0.184	0.17	0.188	0.185	0.205	0.255	0.224	0.211		104.5	0.237	0.238	0.203	0.222	0.226	0.202	0.257	0.198	0.189	0.188	0.222	0.241	0.215	0.25	0.228	0.231	0.22	0.29	0.226	0.317	0.221	0.252	0.225	0.359
104.75	0.168	0.181	0.176	0.174	0.221	0.203	0.177	0.199	0.182	0.17	0.191	0.187	0.205	0.256	0.224	0.21		104.75	0.236	0.239	0.205	0.223	0.226	0.203	0.256	0.199	0.19	0.189	0.222	0.243	0.215	0.252	0.229	0.233	0.22	0.291	0.224	0.316	0.223	0.253	0.227	0.359
105	0.17	0.183	0.176	0.175	0.222	0.204	0.177	0.197	0.185	0.171	0.191	0.189	0.208	0.255	0.226	0.211		105	0.238	0.242	0.207	0.226	0.227	0.204	0.256	0.198	0.192	0.191	0.223	0.242	0.216	0.252	0.23	0.233	0.221	0.291	0.227	0.319	0.226	0.254	0.228	0.361
105.25	0.171	0.183	0.177	0.173	0.223	0.203	0.179	0.197	0.186	0.171	0.191	0.189	0.206	0.255	0.226	0.211		105.25	0.239	0.242	0.206	0.228	0.229	0.206	0.258	0.198	0.193	0.19	0.223	0.244	0.217	0.253	0.228	0.234	0.222	0.292	0.229	0.322	0.226	0.254	0.229	0.361
105.5	0.173	0.185	0.184	0.176	0.226	0.206	0.181	0.201	0.187	0.173	0.191	0.189	0.207	0.258	0.228	0.213		105.5	0.239	0.243	0.207	0.228	0.23	0.206	0.258	0.2	0.193	0.19	0.225	0.245	0.217	0.256	0.229	0.235	0.221	0.296	0.229	0.322	0.226	0.256	0.229	0.363
105.75	0.171	0.183	0.183	0.174	0.225	0.207	0.178	0.2	0.184	0.171	0.191	0.19	0.205	0.256	0.227	0.213		105.75	0.24	0.243	0.206	0.228	0.23	0.206	0.261	0.202	0.192	0.191	0.226	0.247	0.219	0.255	0.231	0.237	0.223	0.294	0.229	0.324	0.227	0.257	0.23	0.365
106	0.173	0.183	0.183	0.175	0.224	0.207	0.18	0.201	0.186	0.174	0.192	0.19	0.209	0.259	0.227	0.213		106	0.241	0.243	0.206	0.228	0.232	0.207	0.258	0.201	0.192	0.192	0.227	0.247	0.218	0.257	0.23	0.236	0.223	0.296	0.229	0.322	0.227	0.257	0.231	0.366
106.25	0.173	0.187	0.183	0.176	0.227	0.208	0.18	0.202	0.187	0.173	0.192	0.191	0.207	0.26	0.228	0.217		106.25	0.239	0.243	0.207	0.229	0.231	0.209	0.259	0.199	0.192	0.192	0.225	0.246	0.217	0.256	0.232	0.237	0.226	0.293	0.228	0.323	0.228	0.257	0.231	0.367
106.5	0.174	0.186	0.184	0.175	0.227	0.206	0.182	0.202	0.189	0.172	0.194	0.191	0.21	0.26	0.23	0.216		106.5	0.239	0.244	0.206	0.228	0.231	0.207	0.259	0.2	0.192	0.193	0.225	0.246	0.217	0.256	0.23	0.235	0.223	0.294	0.229	0.322	0.227	0.255	0.231	0.367
106.75	0.173	0.187	0.183	0.176	0.227	0.209	0.18	0.204	0.188	0.175	0.193	0.191	0.208	0.263	0.23	0.216		106.75	0.239	0.245	0.208	0.227	0.229	0.208	0.259	0.201	0.192	0.191	0.226	0.246	0.22	0.258	0.231	0.239	0.225	0.294	0.228	0.325	0.227	0.257	0.231	0.368
107	0.175	0.187	0.184	0.177	0.227	0.208	0.181	0.204	0.188	0.176	0.194	0.193	0.211	0.265	0.231	0.218		107	0.24	0.245	0.208	0.229	0.229	0.207	0.259	0.201	0.194	0.193	0.227	0.245	0.219	0.257	0.234	0.238	0.223	0.295	0.23	0.324	0.229	0.258	0.232	0.366
107.25	0.174	0.189	0.185	0.176	0.228	0.21	0.182	0.204	0.19	0.175	0.195	0.193	0.21	0.262	0.231	0.215		107.25	0.241	0.244	0.208	0.229	0.23	0.209	0.26	0.201	0.191	0.191	0.226	0.246	0.22	0.257	0.234	0.241	0.225	0.296	0.229	0.325	0.228	0.258	0.233	0.371
107.5	0.174	0.189	0.187	0.177	0.23	0.209	0.185	0.206	0.189	0.176	0.195	0.195	0.212	0.264	0.231	0.218		107.5	0.242	0.246	0.207	0.23	0.231	0.207	0.261	0.201	0.19	0.191	0.227	0.246	0.22	0.259	0.233	0.239	0.225	0.297	0.229	0.328	0.229	0.258	0.233	0.371
107.75	0.173	0.19	0.185	0.177	0.23	0.21	0.183	0.203	0.192	0.176	0.195	0.195	0.211	0.264	0.233	0.218		107.75	0.243	0.248	0.208	0.229	0.231	0.208	0.263	0.204	0.191	0.191	0.227	0.248	0.221	0.259	0.232	0.24	0.224	0.295	0.231	0.327	0.228	0.258	0.233	0.372
108	0.176	0.187	0.185	0.176	0.23	0.21	0.183	0.206	0.192	0.179	0.195	0.195	0.211	0.265	0.233	0.218		108	0.241	0.246	0.209	0.23	0.232	0.211	0.262	0.2	0.194	0.193	0.229	0.248	0.221	0.259	0.234	0.241	0.228	0.298	0.23	0.326	0.229	0.259	0.235	0.372
108.25	0.175	0.188	0.186	0.178	0.233	0.209	0.185	0.206	0.193	0.178	0.197	0.196	0.209	0.267	0.234	0.22		108.25	0.24	0.246	0.211	0.232	0.235	0.211	0.263	0.203	0.195	0.195	0.23	0.251	0.221	0.26	0.235	0.241	0.227	0.3	0.228	0.324	0.231	0.26	0.236	0.376
108.5	0.177	0.19	0.187	0.178	0.232	0.212	0.185	0.207	0.192	0.178	0.197	0.196	0.211	0.268	0.235	0.22		108.5	0.242	0.247	0.212	0.234	0.236	0.213	0.262	0.201	0.196	0.194	0.232	0.252	0.223	0.26	0.236	0.243	0.229	0.302	0.232	0.329	0.234	0.264	0.24	0.377
108.75	0.177	0.189	0.187	0.177	0.231	0.213	0.185	0.205	0.194	0.179	0.196	0.198	0.217	0.267	0.235	0.224		108.75	0.243	0.249	0.214	0.235	0.237	0.214	0.262	0.204	0.2	0.197	0.232	0.253	0.223	0.263	0.237	0.243	0.23	0.303	0.233	0.33	0.234	0.263	0.238	0.379
109	0.177	0.191	0.187	0.178	0.233	0.213	0.186	0.208	0.192	0.179	0.197	0.198	0.219	0.269	0.236	0.227		109	0.247	0.25	0.213	0.237	0.236	0.215	0.261	0.205	0.199	0.197	0.235	0.254	0.226	0.264	0.238	0.247	0.231	0.303	0.235	0.335	0.235	0.266	0.24	0.379
109.25	0.177	0.192	0.189	0.18	0.235	0.214	0.185	0.21	0.192	0.18	0.198	0.2	0.215	0.27	0.236	0.228		109.25	0.248	0.253	0.215	0.237	0.238	0.215	0.266	0.206	0.199	0.198	0.233	0.254	0.227	0.263	0.238	0.246	0.232	0.303	0.236	0.337	0.236	0.267	0.24	0.38
109.5	0.177	0.192	0.189	0.179	0.234	0.214	0.187	0.21	0.194	0.181	0.199	0.2	0.219	0.271	0.238	0.227		109.5	0.25	0.254	0.214	0.236	0.238	0.216	0.267	0.207	0.198	0.197	0.236	0.255	0.228	0.265	0.239	0.247	0.233	0.305	0.238	0.339	0.234	0.265	0.241	0.382
109.75	0.177	0.192	0.189	0.18	0.233	0.214	0.185	0.209	0.196	0.182	0.201	0.2	0.217	0.271	0.237	0.227		109.75	0.248	0.253	0.217	0.238	0.239	0.217	0.266	0.206	0.201	0.198	0.235	0.257	0.228	0.266	0.239	0.249	0.233	0.305	0.238	0.337	0.238	0.267	0.243	0.385
110	0.177	0.193	0.189	0.18	0.236	0.216	0.188	0.21	0.196	0.181	0.2	0.199	0.218	0.272	0.239	0.229		110	0.25	0.254	0.218	0.238	0.243	0.218	0.266	0.208	0.201	0.2	0.236	0.259	0.227	0.266	0.241	0.248	0.233	0.308	0.24	0.341	0.239	0.269	0.245	0.385
110.25	0.177	0.194	0.19	0.18	0.236	0.216	0.187	0.208	0.196	0.182	0.199	0.2	0.218	0.274	0.24	0.228		110.25	0.251	0.256	0.221	0.241	0.243	0.22	0.268	0.209	0.201	0.2	0.239	0.26	0.23	0.267	0.239	0.249	0.235	0.308	0.242	0.342	0.238	0.271	0.245	0.389
110.5	0.178	0.196	0.19	0.185	0.239	0.217	0.189	0.212	0.196	0.183	0.2	0.201	0.22	0.274	0.242	0.229		110.5	0.253	0.256	0.218	0.24	0.244	0.218	0.269	0.209	0.204	0.201	0.238	0.261	0.229	0.269	0.242	0.251	0.235	0.309	0.243	0.343	0.239	0.271	0.246	0.389
110.75	0.178	0.194	0.191	0.184	0.239	0.217	0.188	0.212	0.196	0.183	0.202	0.201	0.22	0.274	0.242	0.229		110.75	0.254	0.258	0.219	0.242	0.244	0.22	0.27	0.21	0.204	0.201	0.239	0.26	0.23	0.27	0.243	0.249	0.236	0.311	0.242	0.343	0.239	0.271	0.247	0.392
111	0.179	0.195	0.191	0.187	0.239	0.217	0.189	0.212	0.197	0.184	0.202	0.201	0.22	0.277	0.241	0.23		111	0.253	0.258	0.221	0.243	0.243	0.22	0.268	0.211	0.205	0.201	0.239	0.259	0.23	0.27	0.245	0.252	0.236	0.311	0.244	0.345	0.241	0.274	0.248	0.391
111.25	0.179	0.194	0.191	0.185	0.236	0.218	0.189	0.211	0.198	0.185	0.201	0.203	0.225	0.276	0.242	0.23		111.25	0.252	0.259	0.223	0.246	0.245	0.222	0.271	0.21	0.205	0.202	0.242	0.263	0.232	0.27	0.244	0.252	0.239	0.312	0.245	0.346	0.245	0.274	0.249	0.394
111.5	0.179	0.195	0.193	0.186	0.242	0.218	0.191	0.213	0.198	0.185	0.202	0.202	0.225	0.278	0.244	0.232		111.5	0.254	0.258	0.222	0.245	0.247	0.222	0.272	0.211	0.205	0.201	0.243	0.262	0.232	0.272	0.243	0.252	0.239	0.312	0.246	0.347	0.245	0.274	0.251	0.394
111.75	0.178	0.196	0.193	0.188	0.243	0.219	0.19	0.214	0.198	0.186	0.203	0.205	0.224	0.278	0.244	0.232		111.75	0.255	0.26	0.223	0.246	0.244	0.221	0.271	0.21	0.206	0.203	0.24	0.261	0.232	0.27	0.246	0.255	0.239	0.311	0.245	0.345	0.246	0.276	0.25	0.394
112	0.18	0.197	0.193	0.187	0.243	0.219	0.191	0.215	0.2	0.187	0.205	0.204	0.224	0.279	0.246	0.234		112	0.254	0.259	0.224	0.244	0.243	0.221	0.272	0.212	0.207	0.204	0.24	0.263	0.232	0.271	0.246	0.253	0.24	0.313	0.245	0.345	0.246	0.276	0.25	0.391
112.25	0.182	0.195	0.192	0.185	0.24	0.22	0.191	0.213	0.202	0.186	0.204	0.205	0.227	0.278	0.246	0.232		112.25	0.253	0.261	0.222	0.245	0.245	0.221	0.272	0.212	0.205	0.205	0.243	0.263	0.232	0.274	0.246	0.254	0.239	0.313	0.244	0.347	0.247	0.276	0.25	0.395
112.5	0.181	0.197	0.193	0.188	0.243	0.221	0.192	0.215	0.203	0.188	0.205	0.204	0.229	0.282	0.247	0.233		112.5	0.255	0.261	0.221	0.244	0.245	0.222	0.272	0.212	0.206	0.203	0.244	0.262	0.234	0.275	0.248	0.254	0.24	0.316	0.245	0.346	0.248	0.276	0.25	0.396
112.75	0.182	0.196	0.194	0.184	0.245	0.222	0.19	0.214	0.202	0.189	0.206	0.206	0.231	0.282	0.246	0.234		112.75	0.256	0.261	0.22	0.243	0.246	0.221	0.272	0.213	0.205	0.202	0.243	0.264	0.234	0.274	0.246	0.255	0.24	0.313	0.246	0.347	0.247	0.275	0.252	0.397
113	0.181	0.196	0.194	0.189	0.244	0.221	0.193	0.216	0.202	0.188	0.205	0.208	0.228	0.284	0.247	0.234		113	0.255	0.262	0.222	0.244	0.245	0.223	0.273	0.214	0.204	0.203	0.242	0.267	0.236	0.276	0.248	0.254	0.24	0.315	0.246	0.347	0.246	0.274	0.251	0.4
113.25	0.181	0.197	0.193	0.187	0.242	0.222	0.192	0.218	0.202	0.188	0.206	0.207	0.232	0.284	0.247	0.236		113.25	0.257	0.262	0.221	0.245	0.243	0.221	0.274	0.213	0.203	0.203	0.244	0.263	0.235	0.276	0.247	0.257	0.241	0.313	0.246	0.347	0.245	0.274	0.252	0.398
113.5	0.182	0.199	0.195	0.188	0.245	0.222	0.193	0.217	0.203	0.188	0.206	0.207	0.231	0.284	0.249	0.236		113.5	0.255	0.261	0.222	0.248	0.246	0.224	0.274	0.212	0.205	0.205	0.245	0.267	0.234	0.274	0.249	0.256	0.24	0.315	0.245	0.346	0.248	0.279	0.253	0.398
113.75	0.183	0.198	0.194	0.188	0.244	0.223	0.194	0.216	0.204	0.191	0.207	0.211	0.231	0.284	0.25	0.235		113.75	0.255	0.264	0.224	0.247	0.249	0.225	0.273	0.213	0.207	0.204	0.248	0.27	0.236	0.276	0.248	0.257	0.243	0.316	0.246	0.35	0.249	0.278	0.256	0.404
114	0.183	0.199	0.195	0.189	0.246	0.223	0.194	0.218	0.204	0.188	0.208	0.209	0.233	0.285	0.252	0.237		114	0.258	0.266	0.224	0.249	0.25	0.228	0.275	0.214	0.207	0.207	0.249	0.27	0.236	0.277	0.25	0.259	0.245	0.318	0.248	0.35	0.25	0.281	0.257	0.404
114.25	0.182	0.201	0.196	0.187	0.248	0.224	0.196	0.22	0.206	0.189	0.208	0.21	0.232	0.287	0.251	0.238		114.25	0.259	0.265	0.225	0.251	0.252	0.228	0.276	0.215	0.209	0.209	0.249	0.271	0.238	0.277	0.249	0.259	0.245	0.316	0.251	0.353	0.251	0.282	0.258	0.406
114.5	0.184	0.202	0.198	0.188	0.249	0.226	0.196	0.22	0.204	0.192	0.208	0.209	0.237	0.292	0.252	0.238		114.5	0.26	0.267	0.228	0.253	0.253	0.228	0.276	0.217	0.213	0.208	0.248	0.272	0.239	0.277	0.251	0.261	0.245	0.319	0.251	0.354	0.253	0.283	0.26	0.407
114.75	0.182	0.202	0.196	0.189	0.25	0.224	0.195	0.22	0.208	0.191	0.208	0.21	0.236	0.294	0.254	0.238		114.75	0.262	0.267	0.229	0.252	0.253	0.229	0.278	0.217	0.212	0.21	0.25	0.274	0.24	0.282	0.251	0.262	0.246	0.32	0.253	0.355	0.254	0.285	0.262	0.407
115	0.184	0.202	0.196	0.19	0.248	0.225	0.196	0.221	0.207	0.193	0.209	0.211	0.236	0.293	0.256	0.239		115	0.264	0.268	0.231	0.255	0.254	0.231	0.279	0.219	0.212	0.209	0.253	0.274	0.242	0.282	0.253	0.263	0.246	0.32	0.255	0.357	0.254	0.285	0.262	0.411
115.25	0.185	0.201	0.197	0.19	0.249	0.225	0.197	0.221	0.207	0.193	0.209	0.212	0.237	0.292	0.258	0.24		115.25	0.264	0.27	0.229	0.254	0.255	0.231	0.281	0.219	0.212	0.211	0.254	0.275	0.242	0.284	0.254	0.263	0.248	0.322	0.256	0.361	0.254	0.286	0.262	0.411
115.5	0.182	0.201	0.199	0.19	0.25	0.225	0.197	0.221	0.209	0.193	0.209	0.211	0.237	0.294	0.257	0.241		115.5	0.264	0.27	0.231	0.254	0.255	0.232	0.278	0.22	0.213	0.211	0.254	0.277	0.242	0.282	0.252	0.264	0.248	0.321	0.257	0.361	0.255	0.286	0.263	0.412
115.75	0.182	0.201	0.199	0.192	0.25	0.227	0.197	0.221	0.207	0.194	0.21	0.213	0.238	0.297	0.259	0.241		115.75	0.266	0.27	0.233	0.257	0.257	0.233	0.282	0.22	0.217	0.213	0.255	0.279	0.244	0.284	0.254	0.266	0.251	0.323	0.264	0.364	0.258	0.288	0.266	0.415
116	0.186	0.201	0.198	0.19	0.252	0.226	0.2	0.223	0.208	0.194	0.211	0.212	0.24	0.295	0.26	0.24		116	0.266	0.273	0.234	0.256	0.257	0.233	0.281	0.221	0.219	0.214	0.253	0.277	0.245	0.285	0.254	0.267	0.25	0.323	0.268	0.365	0.26	0.289	0.266	0.415
116.25	0.185	0.202	0.198	0.19	0.253	0.228	0.201	0.219	0.21	0.195	0.211	0.214	0.24	0.295	0.26	0.242		116.25	0.27	0.275	0.235	0.258	0.258	0.234	0.284	0.222	0.218	0.215	0.258	0.279	0.246	0.287	0.258	0.267	0.251	0.323	0.268	0.366	0.261	0.291	0.266	0.417
116.5	0.184	0.203	0.199	0.192	0.255	0.227	0.201	0.223	0.209	0.195	0.212	0.215	0.242	0.297	0.26	0.243		116.5	0.268	0.275	0.237	0.258	0.262	0.237	0.285	0.223	0.218	0.214	0.257	0.28	0.246	0.289	0.258	0.268	0.254	0.322	0.268	0.367	0.259	0.29	0.268	0.418
116.75	0.185	0.201	0.198	0.192	0.251	0.229	0.2	0.222	0.211	0.196	0.212	0.216	0.243	0.299	0.261	0.244		116.75	0.271	0.277	0.236	0.261	0.263	0.237	0.285	0.223	0.221	0.216	0.258	0.283	0.248	0.29	0.257	0.27	0.252	0.325	0.27	0.367	0.262	0.292	0.27	0.417
117	0.185	0.202	0.199	0.191	0.252	0.229	0.2	0.223	0.211	0.197	0.212	0.216	0.244	0.298	0.26	0.243		117	0.269	0.276	0.235	0.261	0.262	0.237	0.283	0.224	0.218	0.215	0.257	0.281	0.247	0.289	0.255	0.268	0.254	0.328	0.268	0.368	0.26	0.292	0.27	0.421
117.25	0.187	0.201	0.199	0.191	0.251	0.23	0.2	0.224	0.211	0.197	0.212	0.216	0.247	0.299	0.262	0.244		117.25	0.271	0.276	0.238	0.261	0.261	0.236	0.282	0.225	0.22	0.216	0.26	0.282	0.248	0.287	0.258	0.271	0.252	0.328	0.271	0.368	0.264	0.293	0.27	0.423
117.5	0.187	0.203	0.2	0.19	0.254	0.229	0.202	0.223	0.211	0.198	0.212	0.218	0.245	0.301	0.263	0.245		117.5	0.272	0.275	0.238	0.261	0.261	0.239	0.28	0.223	0.219	0.215	0.259	0.283	0.247	0.288	0.259	0.272	0.252	0.327	0.27	0.368	0.263	0.294	0.272	0.423
117.75	0.185	0.201	0.201	0.194	0.25	0.23	0.2	0.224	0.213	0.198	0.213	0.218	0.255	0.301	0.263	0.245		117.75	0.272	0.277	0.236	0.263	0.262	0.238	0.28	0.224	0.218	0.216	0.26	0.28	0.248	0.291	0.26	0.273	0.255	0.327	0.271	0.369	0.263	0.293	0.27	0.423
118	0.188	0.204	0.2	0.191	0.255	0.23	0.201	0.223	0.214	0.198	0.213	0.219	0.258	0.3	0.264	0.245		118	0.272	0.277	0.235	0.261	0.261	0.236	0.282	0.225	0.217	0.216	0.26	0.282	0.249	0.291	0.259	0.272	0.253	0.327	0.27	0.369	0.261	0.293	0.271	0.42
118.25	0.186	0.204	0.2	0.195	0.253	0.23	0.202	0.226	0.213	0.199	0.213	0.219	0.256	0.302	0.263	0.248		118.25	0.272	0.276	0.236	0.26	0.26	0.236	0.281	0.223	0.219	0.214	0.259	0.28	0.249	0.291	0.26	0.274	0.253	0.326	0.269	0.367	0.263	0.294	0.271	0.421
118.5	0.187	0.205	0.201	0.195	0.254	0.232	0.202	0.225	0.215	0.199	0.214	0.218	0.259	0.303	0.266	0.248		118.5	0.271	0.277	0.235	0.262	0.261	0.237	0.28	0.226	0.215	0.217	0.26	0.284	0.25	0.291	0.262	0.273	0.254	0.327	0.268	0.367	0.262	0.294	0.271	0.423
118.75	0.188	0.202	0.201	0.194	0.253	0.232	0.203	0.226	0.216	0.201	0.214	0.22	0.261	0.305	0.265	0.248		118.75	0.27	0.277	0.236	0.263	0.26	0.237	0.279	0.225	0.218	0.217	0.259	0.283	0.248	0.292	0.261	0.274	0.254	0.33	0.267	0.366	0.265	0.296	0.273	0.423
119	0.19	0.207	0.202	0.194	0.256	0.233	0.203	0.225	0.216	0.199	0.214	0.22	0.261	0.304	0.265	0.248		119	0.27	0.278	0.237	0.262	0.261	0.237	0.28	0.225	0.218	0.218	0.26	0.281	0.25	0.292	0.261	0.274	0.256	0.328	0.269	0.367	0.263	0.297	0.272	0.425
119.25	0.189	0.205	0.202	0.192	0.255	0.234	0.203	0.224	0.215	0.201	0.214	0.22	0.261	0.305	0.266	0.246		119.25	0.27	0.277	0.239	0.265	0.262	0.239	0.283	0.224	0.22	0.22	0.258	0.283	0.249	0.292	0.263	0.275	0.256	0.332	0.267	0.368	0.262	0.296	0.273	0.428
119.5	0.188	0.207	0.204	0.193	0.257	0.233	0.204	0.228	0.217	0.201	0.213	0.221	0.262	0.305	0.269	0.248		119.5	0.272	0.279	0.24	0.266	0.264	0.242	0.286	0.225	0.222	0.219	0.264	0.285	0.25	0.293	0.263	0.275	0.26	0.334	0.271	0.37	0.261	0.299	0.277	0.43
119.75	0.188	0.205	0.201	0.193	0.255	0.234	0.203	0.228	0.217	0.203	0.213	0.221	0.263	0.308	0.267	0.249		119.75	0.274	0.281	0.241	0.267	0.267	0.244	0.285	0.228	0.221	0.219	0.266	0.287	0.253	0.294	0.263	0.278	0.258	0.338	0.273	0.374	0.26	0.299	0.279	0.432
120	0.189	0.208	0.205	0.194	0.258	0.235	0.206	0.227	0.217	0.201	0.216	0.223	0.264	0.306	0.268	0.249		120	0.275	0.281	0.243	0.268	0.267	0.245	0.284	0.227	0.224	0.222	0.266	0.287	0.252	0.296	0.265	0.278	0.26	0.336	0.271	0.374	0.261	0.3	0.279	0.435
120.25	0.188	0.206	0.202	0.196	0.258	0.233	0.205	0.229	0.217	0.202	0.215	0.222	0.264	0.308	0.271	0.249		120.25	0.277	0.283	0.242	0.269	0.269	0.244	0.285	0.23	0.224	0.222	0.267	0.29	0.253	0.295	0.262	0.279	0.262	0.339	0.274	0.375	0.261	0.301	0.28	0.432
120.5	0.19	0.209	0.204	0.195	0.259	0.235	0.207	0.228	0.218	0.203	0.216	0.221	0.265	0.308	0.271	0.25		120.5	0.278	0.285	0.24	0.268	0.27	0.244	0.286	0.229	0.223	0.223	0.268	0.291	0.255	0.297	0.266	0.279	0.262	0.339	0.277	0.375	0.261	0.302	0.284	0.436
120.75	0.188	0.208	0.204	0.196	0.259	0.235	0.206	0.23	0.218	0.204	0.216	0.224	0.266	0.31	0.27	0.251		120.75	0.28	0.287	0.244	0.269	0.27	0.246	0.288	0.231	0.224	0.223	0.268	0.293	0.256	0.299	0.265	0.28	0.263	0.337	0.281	0.379	0.259	0.298	0.282	0.439
121	0.19	0.207	0.204	0.197	0.259	0.234	0.208	0.229	0.219	0.204	0.217	0.225	0.268	0.311	0.271	0.252		121	0.28	0.286	0.245	0.272	0.27	0.248	0.29	0.231	0.227	0.223	0.268	0.291	0.256	0.3	0.264	0.28	0.262	0.336	0.282	0.38	0.26	0.302	0.283	0.439
121.25	0.19	0.209	0.204	0.194	0.258	0.235	0.207	0.23	0.22	0.205	0.217	0.224	0.268	0.31	0.271	0.25		121.25	0.282	0.287	0.249	0.271	0.272	0.249	0.29	0.232	0.228	0.225	0.271	0.293	0.257	0.298	0.268	0.283	0.264	0.338	0.283	0.384	0.261	0.301	0.285	0.439
121.5	0.191	0.21	0.204	0.196	0.261	0.234	0.208	0.233	0.22	0.206	0.218	0.224	0.27	0.312	0.273	0.253		121.5	0.282	0.288	0.248	0.272	0.275	0.249	0.288	0.234	0.228	0.225	0.272	0.293	0.259	0.303	0.267	0.283	0.268	0.342	0.284	0.384	0.259	0.303	0.29	0.442
121.75	0.189	0.209	0.206	0.197	0.261	0.24	0.209	0.231	0.221	0.206	0.218	0.225	0.269	0.312	0.273	0.254		121.75	0.283	0.29	0.248	0.275	0.274	0.249	0.29	0.237	0.229	0.225	0.273	0.294	0.259	0.302	0.269	0.285	0.264	0.341	0.286	0.385	0.256	0.306	0.289	0.445
122	0.192	0.21	0.205	0.197	0.263	0.238	0.209	0.234	0.222	0.207	0.22	0.227	0.272	0.315	0.274	0.255		122	0.285	0.291	0.25	0.276	0.277	0.251	0.289	0.234	0.231	0.226	0.274	0.297	0.26	0.305	0.269	0.285	0.267	0.343	0.286	0.386	0.26	0.306	0.29	0.441
122.25	0.192	0.212	0.207	0.197	0.265	0.237	0.209	0.235	0.222	0.208	0.218	0.227	0.273	0.314	0.275	0.256		122.25	0.285	0.291	0.25	0.276	0.276	0.251	0.29	0.237	0.23	0.226	0.273	0.297	0.261	0.304	0.272	0.286	0.267	0.343	0.288	0.387	0.253	0.308	0.29	0.44
122.5	0.193	0.21	0.207	0.198	0.263	0.239	0.209	0.235	0.221	0.208	0.22	0.227	0.274	0.314	0.275	0.255		122.5	0.288	0.292	0.252	0.277	0.277	0.251	0.293	0.237	0.229	0.228	0.274	0.299	0.262	0.307	0.272	0.289	0.268	0.344	0.291	0.391	0.252	0.307	0.291	0.443
122.75	0.192	0.212	0.207	0.198	0.264	0.238	0.21	0.236	0.223	0.207	0.22	0.227	0.275	0.316	0.276	0.257		122.75	0.287	0.292	0.252	0.279	0.278	0.255	0.292	0.237	0.234	0.229	0.273	0.297	0.263	0.308	0.271	0.287	0.269	0.345	0.29	0.39	0.254	0.31	0.293	0.445
123	0.195	0.212	0.207	0.197	0.265	0.239	0.21	0.236	0.224	0.209	0.22	0.227	0.276	0.317	0.277	0.258		123	0.287	0.294	0.252	0.279	0.279	0.254	0.292	0.236	0.229	0.23	0.277	0.301	0.263	0.307	0.271	0.289	0.269	0.346	0.292	0.39	0.251	0.309	0.297	0.445
123.25	0.195	0.212	0.208	0.199	0.265	0.241	0.211	0.238	0.225	0.21	0.221	0.226	0.276	0.319	0.278	0.259		123.25	0.29	0.295	0.252	0.279	0.28	0.254	0.295	0.239	0.234	0.225	0.278	0.303	0.263	0.308	0.274	0.287	0.27	0.348	0.294	0.392	0.25	0.31	0.297	0.446
123.5	0.194	0.213	0.208	0.199	0.265	0.241	0.211	0.237	0.225	0.21	0.221	0.229	0.278	0.318	0.278	0.261		123.5	0.287	0.293	0.253	0.279	0.277	0.253	0.295	0.238	0.232	0.225	0.277	0.301	0.262	0.306	0.275	0.289	0.272	0.345	0.29	0.385	0.259	0.31	0.297	0.444
123.75	0.195	0.21	0.208	0.199	0.264	0.242	0.212	0.24	0.226	0.21	0.223	0.228	0.28	0.321	0.278	0.261		123.75	0.289	0.294	0.251	0.279	0.278	0.253	0.295	0.238	0.233	0.226	0.277	0.3	0.264	0.31	0.275	0.289	0.27	0.347	0.291	0.39	0.25	0.31	0.296	0.445
124	0.193	0.212	0.21	0.2	0.267	0.242	0.214	0.241	0.227	0.212	0.221	0.23	0.279	0.321	0.281	0.262		124	0.289	0.296	0.253	0.279	0.277	0.253	0.298	0.239	0.232	0.225	0.274	0.299	0.263	0.309	0.272	0.288	0.272	0.342	0.292	0.388	0.245	0.308	0.297	0.446
124.25	0.195	0.213	0.209	0.2	0.268	0.244	0.213	0.24	0.227	0.212	0.223	0.236	0.28	0.322	0.281	0.263		124.25	0.29	0.297	0.253	0.281	0.277	0.254	0.296	0.24	0.231	0.223	0.276	0.298	0.267	0.311	0.271	0.29	0.272	0.343	0.295	0.391	0.24	0.309	0.299	0.445
124.5	0.197	0.213	0.21	0.201	0.268	0.245	0.214	0.241	0.229	0.214	0.224	0.236	0.282	0.322	0.282	0.264		124.5	0.289	0.295	0.253	0.281	0.277	0.254	0.297	0.239	0.232	0.225	0.279	0.299	0.264	0.309	0.276	0.291	0.27	0.343	0.292	0.388	0.239	0.31	0.298	0.448
124.75	0.196	0.214	0.211	0.199	0.27	0.245	0.214	0.241	0.231	0.213	0.225	0.237	0.283	0.323	0.283	0.265		124.75	0.289	0.296	0.254	0.281	0.28	0.254	0.296	0.239	0.232	0.227	0.279	0.301	0.265	0.308	0.275	0.291	0.273	0.343	0.291	0.39	0.236	0.309	0.298	0.448
125	0.199	0.215	0.211	0.201	0.27	0.245	0.216	0.242	0.23	0.214	0.225	0.236	0.283	0.325	0.283	0.266		125	0.288	0.296	0.254	0.282	0.279	0.256	0.291	0.239	0.233	0.229	0.28	0.301	0.265	0.308	0.277	0.293	0.273	0.341	0.291	0.391	0.235	0.311	0.297	0.451
125.25	0.197	0.215	0.212	0.201	0.27	0.246	0.216	0.244	0.23	0.215	0.226	0.238	0.285	0.326	0.284	0.267		125.25	0.289	0.296	0.255	0.281	0.281	0.257	0.294	0.239	0.231	0.227	0.28	0.303	0.265	0.312	0.276	0.293	0.273	0.347	0.292	0.39	0.233	0.312	0.301	0.452
125.5	0.198	0.215	0.211	0.203	0.268	0.245	0.216	0.244	0.231	0.216	0.227	0.237	0.285	0.327	0.285	0.267		125.5	0.291	0.298	0.254	0.283	0.282	0.258	0.294	0.237	0.236	0.228	0.283	0.303	0.268	0.312	0.276	0.294	0.274	0.346	0.295	0.39	0.232	0.312	0.303	0.454
125.75	0.197	0.216	0.212	0.201	0.27	0.247	0.216	0.243	0.231	0.218	0.226	0.239	0.285	0.327	0.286	0.267		125.75	0.291	0.301	0.257	0.283	0.284	0.259	0.296	0.242	0.234	0.229	0.285	0.304	0.267	0.313	0.276	0.295	0.275	0.35	0.298	0.392	0.236	0.315	0.303	0.455
126	0.2	0.216	0.213	0.203	0.271	0.248	0.219	0.243	0.233	0.218	0.226	0.24	0.287	0.328	0.287	0.268		126	0.293	0.301	0.258	0.285	0.285	0.26	0.295	0.241	0.237	0.229	0.285	0.305	0.267	0.317	0.278	0.295	0.278	0.353	0.3	0.392	0.23	0.315	0.306	0.457
126.25	0.2	0.218	0.212	0.202	0.272	0.248	0.218	0.244	0.233	0.218	0.228	0.241	0.288	0.328	0.288	0.269		126.25	0.297	0.303	0.257	0.284	0.287	0.261	0.298	0.244	0.236	0.231	0.285	0.307	0.271	0.318	0.278	0.297	0.277	0.351	0.302	0.393	0.228	0.314	0.307	0.462
126.5	0.201	0.218	0.212	0.203	0.272	0.247	0.217	0.247	0.232	0.217	0.229	0.241	0.288	0.33	0.288	0.27		126.5	0.296	0.303	0.259	0.288	0.287	0.261	0.302	0.244	0.24	0.23	0.287	0.309	0.27	0.317	0.277	0.299	0.275	0.352	0.302	0.394	0.233	0.318	0.307	0.462
126.75	0.201	0.219	0.214	0.206	0.274	0.248	0.219	0.246	0.233	0.217	0.23	0.243	0.289	0.331	0.29	0.27		126.75	0.298	0.304	0.262	0.291	0.288	0.262	0.298	0.244	0.242	0.233	0.287	0.308	0.271	0.319	0.278	0.301	0.277	0.351	0.304	0.394	0.236	0.321	0.309	0.46
127	0.202	0.217	0.213	0.205	0.275	0.248	0.223	0.246	0.236	0.219	0.229	0.243	0.292	0.329	0.29	0.27		127	0.298	0.305	0.263	0.291	0.289	0.265	0.299	0.246	0.243	0.232	0.285	0.311	0.273	0.319	0.282	0.3	0.28	0.355	0.304	0.397	0.234	0.32	0.31	0.462
127.25	0.2	0.22	0.215	0.207	0.275	0.249	0.223	0.248	0.234	0.22	0.229	0.242	0.289	0.335	0.292	0.272		127.25	0.301	0.308	0.263	0.292	0.293	0.264	0.298	0.246	0.241	0.234	0.289	0.312	0.275	0.32	0.282	0.3	0.281	0.357	0.304	0.4	0.235	0.319	0.312	0.462
127.5	0.203	0.218	0.213	0.204	0.276	0.25	0.223	0.249	0.235	0.221	0.231	0.244	0.293	0.334	0.292	0.274		127.5	0.302	0.307	0.265	0.293	0.292	0.265	0.301	0.247	0.244	0.235	0.286	0.312	0.275	0.321	0.283	0.302	0.28	0.357	0.307	0.399	0.235	0.321	0.313	0.465
127.75	0.202	0.219	0.216	0.206	0.278	0.251	0.225	0.25	0.238	0.225	0.23	0.247	0.293	0.336	0.293	0.274		127.75	0.303	0.311	0.265	0.294	0.294	0.267	0.303	0.247	0.243	0.235	0.29	0.314	0.276	0.322	0.284	0.302	0.282	0.359	0.307	0.404	0.236	0.324	0.313	0.469
128	0.203	0.22	0.215	0.206	0.276	0.251	0.223	0.249	0.236	0.223	0.232	0.245	0.294	0.336	0.293	0.275		128	0.303	0.311	0.263	0.294	0.294	0.268	0.304	0.247	0.245	0.236	0.291	0.313	0.276	0.323	0.282	0.302	0.283	0.359	0.307	0.403	0.233	0.322	0.313	0.47
128.25	0.202	0.22	0.215	0.208	0.277	0.253	0.226	0.249	0.237	0.224	0.231	0.245	0.293	0.339	0.294	0.276		128.25	0.304	0.311	0.267	0.297	0.295	0.269	0.305	0.249	0.246	0.237	0.29	0.317	0.276	0.324	0.285	0.304	0.284	0.362	0.31	0.404	0.237	0.325	0.315	0.472
128.5	0.203	0.223	0.217	0.206	0.279	0.253	0.226	0.251	0.239	0.224	0.234	0.247	0.295	0.338	0.296	0.277		128.5	0.305	0.312	0.269	0.298	0.296	0.269	0.306	0.25	0.247	0.236	0.293	0.315	0.279	0.325	0.286	0.305	0.283	0.364	0.308	0.411	0.238	0.326	0.318	0.472
128.75	0.204	0.22	0.215	0.206	0.279	0.254	0.225	0.251	0.239	0.224	0.234	0.247	0.295	0.337	0.294	0.276		128.75	0.308	0.314	0.267	0.296	0.296	0.27	0.307	0.25	0.244	0.236	0.294	0.316	0.28	0.327	0.282	0.305	0.285	0.362	0.308	0.406	0.238	0.323	0.318	0.475
129	0.205	0.224	0.218	0.205	0.282	0.254	0.226	0.251	0.239	0.225	0.235	0.249	0.297	0.336	0.297	0.278		129	0.306	0.313	0.269	0.298	0.296	0.27	0.308	0.253	0.25	0.239	0.294	0.318	0.28	0.326	0.286	0.306	0.286	0.363	0.305	0.404	0.238	0.326	0.318	0.476
129.25	0.204	0.224	0.218	0.209	0.282	0.256	0.226	0.253	0.238	0.226	0.235	0.25	0.297	0.341	0.297	0.28		129.25	0.305	0.313	0.271	0.3	0.296	0.271	0.305	0.25	0.249	0.238	0.295	0.315	0.279	0.326	0.288	0.308	0.285	0.364	0.309	0.404	0.241	0.33	0.319	0.477
129.5	0.205	0.225	0.218	0.208	0.28	0.254	0.227	0.253	0.24	0.227	0.236	0.25	0.3	0.342	0.298	0.28		129.5	0.307	0.313	0.266	0.298	0.296	0.271	0.31	0.25	0.246	0.238	0.291	0.317	0.28	0.328	0.288	0.307	0.286	0.363	0.31	0.405	0.235	0.325	0.318	0.475
129.75	0.207	0.224	0.219	0.207	0.282	0.256	0.228	0.251	0.239	0.225	0.235	0.252	0.299	0.346	0.299	0.281		129.75	0.308	0.316	0.268	0.298	0.297	0.272	0.307	0.252	0.247	0.238	0.293	0.316	0.279	0.329	0.287	0.308	0.288	0.359	0.308	0.407	0.237	0.324	0.319	0.476
130	0.206	0.226	0.219	0.209	0.283	0.256	0.227	0.253	0.243	0.227	0.236	0.252	0.299	0.345	0.3	0.282		130	0.306	0.315	0.269	0.298	0.296	0.271	0.307	0.252	0.247	0.237	0.292	0.318	0.279	0.327	0.284	0.309	0.288	0.363	0.305	0.408	0.234	0.33	0.32	0.48
130.25	0.205	0.231	0.221	0.207	0.285	0.257	0.23	0.255	0.242	0.228	0.237	0.249	0.299	0.345	0.301	0.281		130.25	0.305	0.314	0.271	0.3	0.296	0.272	0.304	0.251	0.247	0.24	0.295	0.316	0.279	0.327	0.287	0.309	0.287	0.36	0.299	0.405	0.236	0.33	0.319	0.483
130.5	0.209	0.223	0.217	0.21	0.281	0.258	0.229	0.256	0.243	0.231	0.237	0.254	0.302	0.347	0.3	0.283		130.5	0.306	0.315	0.27	0.301	0.296	0.272	0.303	0.251	0.249	0.24	0.295	0.317	0.28	0.327	0.286	0.308	0.288	0.361	0.3	0.405	0.233	0.328	0.32	0.48
130.75	0.208	0.226	0.221	0.21	0.284	0.26	0.229	0.257	0.243	0.23	0.239	0.253	0.301	0.347	0.302	0.284		130.75	0.307	0.317	0.273	0.302	0.299	0.272	0.306	0.253	0.247	0.236	0.297	0.315	0.28	0.327	0.287	0.309	0.287	0.359	0.286	0.408	0.236	0.33	0.32	0.482
131	0.209	0.226	0.22	0.211	0.285	0.257	0.231	0.256	0.243	0.23	0.24	0.254	0.302	0.347	0.303	0.285		131	0.306	0.316	0.271	0.303	0.3	0.275	0.306	0.251	0.247	0.24	0.296	0.318	0.281	0.33	0.288	0.307	0.29	0.359	0.279	0.403	0.235	0.329	0.322	0.485
131.25	0.209	0.226	0.221	0.212	0.286	0.26	0.231	0.259	0.244	0.232	0.241	0.255	0.305	0.35	0.303	0.286		131.25	0.308	0.318	0.272	0.305	0.301	0.276	0.309	0.252	0.247	0.241	0.299	0.321	0.281	0.329	0.293	0.308	0.29	0.36	0.268	0.407	0.238	0.33	0.324	0.484
131.5	0.208	0.224	0.219	0.212	0.287	0.261	0.23	0.257	0.245	0.23	0.241	0.257	0.305	0.35	0.303	0.285		131.5	0.31	0.32	0.275	0.305	0.302	0.277	0.309	0.254	0.251	0.242	0.302	0.322	0.284	0.332	0.289	0.31	0.291	0.365	0.265	0.41	0.238	0.332	0.325	0.487
131.75	0.21	0.227	0.222	0.211	0.29	0.26	0.233	0.258	0.245	0.232	0.241	0.257	0.307	0.352	0.304	0.286		131.75	0.313	0.321	0.276	0.306	0.303	0.279	0.314	0.257	0.249	0.243	0.298	0.323	0.285	0.334	0.292	0.309	0.293	0.364	0.26	0.41	0.236	0.334	0.327	0.489
132	0.209	0.231	0.222	0.211	0.29	0.261	0.231	0.26	0.246	0.232	0.242	0.259	0.306	0.353	0.306	0.286		132	0.313	0.32	0.275	0.307	0.305	0.278	0.314	0.257	0.253	0.244	0.3	0.323	0.286	0.335	0.292	0.311	0.293	0.363	0.257	0.408	0.239	0.336	0.328	0.49
132.25	0.209	0.23	0.222	0.213	0.289	0.261	0.233	0.261	0.247	0.234	0.243	0.259	0.305	0.355	0.307	0.287		132.25	0.316	0.322	0.278	0.309	0.306	0.28	0.311	0.258	0.255	0.243	0.302	0.324	0.286	0.336	0.293	0.312	0.296	0.364	0.256	0.415	0.237	0.334	0.33	0.493
132.5	0.209	0.229	0.222	0.213	0.291	0.26	0.234	0.261	0.249	0.236	0.243	0.259	0.308	0.355	0.306	0.289		132.5	0.316	0.325	0.278	0.309	0.306	0.281	0.314	0.257	0.251	0.245	0.301	0.328	0.288	0.338	0.293	0.314	0.295	0.365	0.254	0.417	0.238	0.331	0.33	0.496
132.75	0.21	0.231	0.224	0.211	0.291	0.262	0.235	0.26	0.249	0.235	0.243	0.259	0.311	0.354	0.308	0.287		132.75	0.319	0.325	0.28	0.312	0.308	0.282	0.314	0.259	0.255	0.245	0.303	0.323	0.289	0.337	0.294	0.311	0.297	0.367	0.249	0.419	0.237	0.332	0.33	0.494
133	0.211	0.23	0.224	0.213	0.29	0.263	0.234	0.262	0.251	0.236	0.244	0.261	0.309	0.356	0.307	0.289		133	0.318	0.326	0.281	0.312	0.311	0.283	0.314	0.26	0.256	0.247	0.306	0.327	0.29	0.339	0.296	0.314	0.296	0.37	0.247	0.421	0.239	0.336	0.332	0.496
133.25	0.21	0.231	0.224	0.214	0.293	0.263	0.235	0.262	0.25	0.237	0.243	0.259	0.311	0.356	0.309	0.291		133.25	0.319	0.328	0.282	0.315	0.312	0.284	0.317	0.262	0.259	0.25	0.305	0.328	0.291	0.341	0.296	0.316	0.294	0.37	0.248	0.414	0.237	0.335	0.334	0.497
133.5	0.212	0.231	0.224	0.213	0.293	0.265	0.236	0.262	0.252	0.239	0.245	0.261	0.314	0.358	0.308	0.289		133.5	0.321	0.329	0.284	0.315	0.313	0.287	0.315	0.262	0.257	0.248	0.302	0.33	0.292	0.342	0.297	0.315	0.299	0.369	0.247	0.413	0.239	0.337	0.336	0.504
133.75	0.212	0.23	0.223	0.214	0.293	0.265	0.234	0.263	0.252	0.238	0.246	0.262	0.313	0.358	0.309	0.293		133.75	0.323	0.33	0.283	0.315	0.313	0.287	0.319	0.262	0.258	0.249	0.304	0.328	0.294	0.342	0.295	0.315	0.302	0.369	0.246	0.416	0.24	0.337	0.337	0.506
134	0.214	0.229	0.223	0.212	0.291	0.266	0.234	0.265	0.253	0.238	0.245	0.261	0.314	0.361	0.309	0.291		134	0.324	0.33	0.283	0.315	0.313	0.286	0.323	0.266	0.258	0.247	0.305	0.329	0.295	0.342	0.298	0.317	0.3	0.366	0.245	0.416	0.241	0.337	0.338	0.506
134.25	0.213	0.233	0.225	0.214	0.295	0.266	0.235	0.264	0.252	0.238	0.244	0.263	0.314	0.36	0.311	0.293		134.25	0.324	0.331	0.285	0.317	0.316	0.287	0.324	0.265	0.258	0.251	0.306	0.334	0.295	0.343	0.298	0.32	0.303	0.371	0.245	0.417	0.244	0.339	0.339	0.506
134.5	0.214	0.233	0.224	0.214	0.294	0.266	0.237	0.264	0.254	0.24	0.248	0.263	0.316	0.359	0.311	0.294		134.5	0.325	0.334	0.286	0.318	0.316	0.289	0.319	0.266	0.259	0.251	0.306	0.33	0.295	0.344	0.3	0.32	0.303	0.372	0.245	0.418	0.24	0.34	0.34	0.508
134.75	0.216	0.234	0.227	0.215	0.295	0.267	0.236	0.267	0.255	0.241	0.248	0.264	0.319	0.363	0.312	0.295		134.75	0.325	0.333	0.283	0.317	0.316	0.288	0.317	0.264	0.256	0.25	0.307	0.331	0.297	0.346	0.3	0.321	0.303	0.374	0.246	0.419	0.243	0.338	0.34	0.508
135	0.215	0.231	0.226	0.215	0.295	0.266	0.237	0.265	0.255	0.242	0.249	0.266	0.317	0.363	0.312	0.294		135	0.326	0.333	0.286	0.318	0.317	0.289	0.319	0.266	0.255	0.249	0.307	0.334	0.296	0.347	0.3	0.322	0.304	0.373	0.242	0.421	0.245	0.338	0.34	0.51
135.25	0.217	0.231	0.226	0.215	0.294	0.268	0.237	0.267	0.255	0.241	0.249	0.265	0.319	0.365	0.312	0.296		135.25	0.325	0.333	0.284	0.317	0.314	0.289	0.32	0.267	0.258	0.247	0.305	0.331	0.295	0.346	0.3	0.323	0.304	0.374	0.236	0.421	0.243	0.33	0.341	0.51
135.5	0.217	0.233	0.226	0.214	0.297	0.266	0.238	0.267	0.256	0.244	0.251	0.268	0.319	0.365	0.314	0.295		135.5	0.325	0.334	0.286	0.318	0.315	0.288	0.318	0.263	0.257	0.249	0.309	0.328	0.297	0.347	0.3	0.326	0.306	0.373	0.237	0.42	0.242	0.34	0.341	0.511
135.75	0.216	0.232	0.226	0.215	0.296	0.269	0.239	0.267	0.258	0.244	0.25	0.266	0.32	0.365	0.314	0.297		135.75	0.324	0.334	0.288	0.32	0.316	0.29	0.318	0.267	0.258	0.251	0.307	0.33	0.297	0.347	0.3	0.327	0.304	0.377	0.234	0.42	0.24	0.339	0.342	0.513
136	0.217	0.232	0.225	0.216	0.295	0.269	0.238	0.268	0.259	0.243	0.25	0.267	0.322	0.366	0.313	0.299		136	0.326	0.335	0.287	0.32	0.316	0.29	0.318	0.267	0.258	0.251	0.305	0.327	0.299	0.346	0.302	0.325	0.306	0.375	0.238	0.42	0.239	0.336	0.342	0.513
136.25	0.218	0.233	0.224	0.215	0.296	0.27	0.238	0.268	0.259	0.244	0.251	0.266	0.322	0.366	0.314	0.299		136.25	0.324	0.335	0.287	0.322	0.316	0.29	0.32	0.266	0.257	0.251	0.305	0.33	0.297	0.349	0.303	0.327	0.306	0.374	0.23	0.424	0.241	0.338	0.342	0.497
136.5	0.218	0.232	0.225	0.215	0.296	0.27	0.239	0.269	0.26	0.245	0.251	0.269	0.323	0.368	0.314	0.299		136.5	0.328	0.335	0.289	0.323	0.317	0.292	0.319	0.266	0.258	0.25	0.307	0.33	0.298	0.347	0.303	0.328	0.307	0.377	0.236	0.424	0.244	0.34	0.345	0.501
136.75	0.218	0.235	0.228	0.213	0.299	0.27	0.239	0.266	0.261	0.246	0.252	0.268	0.324	0.366	0.317	0.3		136.75	0.328	0.337	0.291	0.323	0.319	0.294	0.313	0.267	0.26	0.253	0.308	0.333	0.298	0.349	0.303	0.331	0.309	0.375	0.233	0.426	0.247	0.341	0.346	0.505
137	0.219	0.235	0.226	0.217	0.299	0.27	0.239	0.268	0.262	0.248	0.252	0.271	0.325	0.368	0.318	0.301		137	0.33	0.338	0.293	0.325	0.324	0.295	0.315	0.267	0.26	0.254	0.31	0.335	0.3	0.352	0.304	0.331	0.307	0.38	0.235	0.429	0.247	0.338	0.349	0.505
137.25	0.217	0.237	0.23	0.216	0.301	0.272	0.245	0.27	0.261	0.248	0.253	0.271	0.325	0.37	0.319	0.303		137.25	0.329	0.338	0.293	0.325	0.321	0.296	0.314	0.269	0.264	0.255	0.31	0.336	0.3	0.351	0.305	0.333	0.309	0.38	0.232	0.43	0.245	0.341	0.349	0.51
137.5	0.217	0.237	0.229	0.218	0.303	0.271	0.244	0.273	0.261	0.248	0.254	0.272	0.326	0.372	0.32	0.303		137.5	0.332	0.341	0.292	0.326	0.323	0.298	0.315	0.27	0.265	0.255	0.312	0.339	0.303	0.352	0.305	0.333	0.311	0.385	0.231	0.428	0.242	0.342	0.351	0.511
137.75	0.218	0.235	0.228	0.219	0.299	0.272	0.243	0.271	0.263	0.247	0.254	0.272	0.327	0.375	0.318	0.303		137.75	0.335	0.342	0.294	0.326	0.326	0.297	0.317	0.273	0.263	0.255	0.313	0.34	0.304	0.353	0.306	0.334	0.313	0.383	0.236	0.434	0.243	0.338	0.352	0.511
138	0.218	0.236	0.229	0.216	0.301	0.273	0.245	0.272	0.263	0.249	0.254	0.271	0.326	0.373	0.32	0.305		138	0.335	0.343	0.295	0.33	0.326	0.299	0.318	0.271	0.266	0.257	0.313	0.339	0.304	0.355	0.309	0.335	0.313	0.381	0.23	0.43	0.245	0.344	0.353	0.512
138.25	0.219	0.237	0.23	0.218	0.301	0.273	0.247	0.272	0.263	0.25	0.255	0.273	0.33	0.375	0.321	0.305		138.25	0.337	0.346	0.297	0.331	0.325	0.299	0.32	0.273	0.267	0.255	0.312	0.34	0.307	0.356	0.309	0.337	0.314	0.385	0.234	0.435	0.247	0.345	0.354	0.514
138.5	0.218	0.238	0.229	0.218	0.301	0.274	0.246	0.271	0.265	0.251	0.257	0.274	0.33	0.378	0.32	0.306		138.5	0.34	0.347	0.297	0.332	0.328	0.303	0.322	0.275	0.267	0.254	0.316	0.342	0.307	0.356	0.307	0.336	0.313	0.384	0.234	0.437	0.244	0.346	0.357	0.515
138.75	0.217	0.238	0.232	0.218	0.305	0.275	0.248	0.272	0.266	0.25	0.256	0.272	0.329	0.378	0.323	0.306		138.75	0.341	0.349	0.3	0.335	0.331	0.305	0.322	0.276	0.271	0.259	0.319	0.346	0.309	0.356	0.313	0.338	0.317	0.388	0.236	0.435	0.248	0.344	0.359	0.521
139	0.218	0.237	0.231	0.22	0.303	0.276	0.246	0.272	0.266	0.25	0.257	0.274	0.331	0.377	0.323	0.308		139	0.343	0.351	0.299	0.334	0.334	0.304	0.324	0.275	0.27	0.261	0.321	0.347	0.307	0.36	0.312	0.338	0.316	0.393	0.239	0.444	0.249	0.347	0.361	0.523
139.25	0.218	0.238	0.23	0.218	0.302	0.277	0.247	0.274	0.265	0.25	0.257	0.275	0.331	0.383	0.323	0.31		139.25	0.343	0.352	0.3	0.335	0.334	0.306	0.328	0.276	0.274	0.259	0.321	0.349	0.312	0.361	0.311	0.337	0.318	0.393	0.243	0.442	0.246	0.347	0.362	0.524
139.5	0.22	0.239	0.23	0.219	0.304	0.278	0.247	0.276	0.268	0.254	0.258	0.275	0.334	0.383	0.324	0.31		139.5	0.343	0.352	0.301	0.337	0.333	0.305	0.328	0.276	0.273	0.259	0.321	0.348	0.313	0.359	0.313	0.339	0.322	0.391	0.24	0.433	0.251	0.346	0.361	0.523
139.75	0.218	0.239	0.231	0.22	0.305	0.279	0.248	0.277	0.267	0.254	0.258	0.277	0.333	0.383	0.323	0.31		139.75	0.344	0.352	0.301	0.336	0.331	0.305	0.33	0.277	0.274	0.259	0.321	0.343	0.312	0.36	0.313	0.343	0.319	0.391	0.237	0.434	0.248	0.341	0.362	0.524
140	0.22	0.24	0.232	0.218	0.308	0.276	0.25	0.274	0.268	0.253	0.258	0.277	0.334	0.381	0.326	0.31		140	0.343	0.352	0.301	0.337	0.331	0.305	0.331	0.276	0.271	0.258	0.322	0.344	0.311	0.36	0.313	0.343	0.314	0.391	0.236	0.434	0.241	0.344	0.362	0.521
140.25	0.221	0.237	0.233	0.22	0.305	0.278	0.248	0.277	0.27	0.254	0.258	0.278	0.336	0.383	0.326	0.312		140.25	0.343	0.353	0.3	0.337	0.332	0.305	0.325	0.277	0.27	0.257	0.321	0.342	0.312	0.362	0.316	0.342	0.317	0.39	0.239	0.425	0.244	0.342	0.363	0.524
140.5	0.221	0.238	0.232	0.22	0.306	0.279	0.251	0.276	0.272	0.255	0.262	0.28	0.337	0.385	0.327	0.313		140.5	0.341	0.351	0.301	0.337	0.333	0.305	0.327	0.275	0.271	0.261	0.324	0.344	0.311	0.361	0.314	0.343	0.317	0.39	0.236	0.41	0.247	0.342	0.363	0.517
140.75	0.221	0.239	0.233	0.22	0.306	0.28	0.25	0.279	0.271	0.253	0.261	0.281	0.338	0.387	0.327	0.314		140.75	0.341	0.35	0.303	0.337	0.334	0.308	0.322	0.274	0.274	0.262	0.322	0.342	0.311	0.361	0.315	0.344	0.319	0.39	0.234	0.416	0.245	0.342	0.365	0.511
141	0.221	0.238	0.232	0.221	0.308	0.277	0.25	0.277	0.272	0.256	0.261	0.283	0.339	0.384	0.328	0.315		141	0.342	0.353	0.303	0.339	0.333	0.306	0.32	0.276	0.274	0.261	0.323	0.345	0.312	0.364	0.315	0.345	0.322	0.389	0.235	0.411	0.247	0.344	0.366	0.51
141.25	0.223	0.239	0.233	0.22	0.309	0.282	0.252	0.277	0.274	0.255	0.261	0.282	0.339	0.386	0.331	0.313		141.25	0.344	0.354	0.305	0.341	0.335	0.307	0.318	0.276	0.276	0.258	0.321	0.345	0.312	0.364	0.317	0.347	0.32	0.392	0.235	0.41	0.244	0.344	0.366	0.493
141.5	0.224	0.239	0.234	0.223	0.311	0.281	0.252	0.279	0.273	0.259	0.262	0.283	0.341	0.388	0.331	0.315		141.5	0.345	0.355	0.304	0.339	0.336	0.307	0.321	0.277	0.274	0.258	0.323	0.343	0.311	0.364	0.316	0.348	0.319	0.391	0.233	0.406	0.244	0.341	0.366	0.477
141.75	0.225	0.239	0.234	0.221	0.308	0.28	0.251	0.278	0.275	0.259	0.261	0.284	0.343	0.389	0.332	0.316		141.75	0.343	0.354	0.302	0.338	0.335	0.309	0.326	0.28	0.272	0.257	0.325	0.35	0.315	0.366	0.317	0.347	0.321	0.389	0.232	0.419	0.246	0.337	0.369	0.465
142	0.226	0.241	0.235	0.222	0.311	0.282	0.252	0.279	0.276	0.258	0.264	0.283	0.344	0.389	0.333	0.317		142	0.344	0.356	0.306	0.342	0.338	0.31	0.321	0.278	0.277	0.263	0.326	0.351	0.314	0.364	0.314	0.349	0.323	0.39	0.233	0.407	0.247	0.339	0.37	0.452
142.25	0.225	0.243	0.235	0.22	0.311	0.284	0.254	0.278	0.276	0.261	0.264	0.286	0.345	0.387	0.333	0.316		142.25	0.349	0.359	0.306	0.343	0.342	0.313	0.323	0.279	0.274	0.263	0.325	0.354	0.315	0.368	0.318	0.351	0.323	0.396	0.236	0.429	0.247	0.343	0.373	0.454
142.5	0.226	0.241	0.235	0.223	0.312	0.282	0.253	0.281	0.277	0.26	0.264	0.285	0.345	0.39	0.332	0.319		142.5	0.351	0.36	0.307	0.344	0.342	0.313	0.325	0.283	0.279	0.264	0.328	0.348	0.319	0.368	0.317	0.348	0.323	0.397	0.24	0.42	0.245	0.341	0.373	0.462
142.75	0.225	0.24	0.235	0.222	0.31	0.285	0.253	0.281	0.278	0.261	0.265	0.284	0.346	0.391	0.335	0.32		142.75	0.352	0.363	0.308	0.346	0.341	0.315	0.323	0.283	0.276	0.262	0.33	0.345	0.319	0.37	0.319	0.346	0.323	0.398	0.243	0.424	0.246	0.341	0.375	0.467
143	0.226	0.24	0.233	0.224	0.314	0.282	0.253	0.281	0.277	0.261	0.266	0.285	0.347	0.395	0.335	0.321		143	0.353	0.363	0.312	0.346	0.343	0.315	0.327	0.282	0.276	0.265	0.332	0.347	0.319	0.369	0.319	0.348	0.327	0.398	0.238	0.422	0.252	0.344	0.376	0.466
143.25	0.225	0.24	0.234	0.22	0.311	0.284	0.254	0.282	0.279	0.261	0.265	0.286	0.347	0.392	0.334	0.321		143.25	0.353	0.362	0.312	0.347	0.344	0.316	0.331	0.284	0.278	0.264	0.328	0.348	0.321	0.371	0.319	0.35	0.325	0.397	0.24	0.417	0.244	0.346	0.377	0.445
143.5	0.227	0.242	0.236	0.223	0.313	0.285	0.255	0.285	0.28	0.262	0.266	0.287	0.348	0.395	0.336	0.324		143.5	0.352	0.364	0.311	0.348	0.346	0.317	0.336	0.282	0.282	0.264	0.329	0.349	0.322	0.371	0.32	0.351	0.329	0.402	0.241	0.42	0.247	0.344	0.378	0.445
143.75	0.226	0.241	0.236	0.223	0.313	0.285	0.254	0.283	0.278	0.264	0.266	0.287	0.35	0.398	0.336	0.324		143.75	0.353	0.365	0.314	0.35	0.347	0.319	0.334	0.286	0.282	0.266	0.331	0.351	0.322	0.374	0.32	0.35	0.333	0.401	0.24	0.431	0.245	0.346	0.381	0.451
144	0.228	0.242	0.237	0.224	0.317	0.286	0.255	0.285	0.28	0.265	0.267	0.29	0.351	0.396	0.338	0.325		144	0.355	0.365	0.314	0.351	0.348	0.319	0.334	0.285	0.281	0.267	0.332	0.349	0.323	0.374	0.325	0.351	0.33	0.402	0.242	0.436	0.245	0.345	0.383	0.445
144.25	0.226	0.243	0.236	0.225	0.317	0.288	0.256	0.287	0.281	0.263	0.268	0.289	0.35	0.397	0.339	0.33		144.25	0.356	0.366	0.315	0.351	0.347	0.32	0.336	0.288	0.281	0.267	0.334	0.35	0.323	0.375	0.325	0.354	0.329	0.398	0.242	0.419	0.248	0.348	0.381	0.443
144.5	0.229	0.242	0.238	0.224	0.316	0.286	0.256	0.285	0.281	0.264	0.269	0.287	0.352	0.398	0.339	0.327		144.5	0.358	0.365	0.315	0.351	0.35	0.32	0.335	0.287	0.279	0.269	0.33	0.354	0.322	0.376	0.322	0.352	0.333	0.399	0.244	0.43	0.246	0.342	0.383	0.457
144.75	0.228	0.245	0.237	0.227	0.317	0.289	0.257	0.287	0.282	0.265	0.27	0.286	0.354	0.4	0.341	0.328		144.75	0.358	0.368	0.316	0.353	0.349	0.322	0.338	0.289	0.277	0.269	0.33	0.349	0.324	0.377	0.327	0.355	0.334	0.402	0.241	0.423	0.25	0.347	0.382	0.452
145	0.232	0.247	0.239	0.226	0.32	0.287	0.257	0.287	0.284	0.266	0.271	0.284	0.355	0.4	0.342	0.33		145	0.358	0.368	0.317	0.355	0.349	0.324	0.34	0.288	0.283	0.269	0.33	0.352	0.325	0.376	0.323	0.356	0.331	0.403	0.242	0.431	0.253	0.346	0.386	0.462
145.25	0.229	0.245	0.238	0.226	0.32	0.289	0.261	0.288	0.283	0.266	0.268	0.285	0.355	0.402	0.342	0.331		145.25	0.359	0.369	0.318	0.354	0.351	0.323	0.321	0.288	0.281	0.271	0.332	0.356	0.326	0.38	0.328	0.354	0.334	0.402	0.244	0.43	0.252	0.342	0.385	0.457
145.5	0.232	0.247	0.24	0.227	0.321	0.289	0.26	0.29	0.282	0.266	0.272	0.285	0.356	0.402	0.343	0.332		145.5	0.359	0.369	0.317	0.353	0.35	0.322	0.329	0.29	0.28	0.27	0.331	0.352	0.324	0.378	0.326	0.354	0.333	0.401	0.242	0.433	0.248	0.344	0.387	0.435
145.75	0.232	0.245	0.239	0.227	0.319	0.293	0.259	0.289	0.284	0.268	0.272	0.284	0.357	0.402	0.344	0.331		145.75	0.359	0.369	0.317	0.353	0.349	0.323	0.329	0.291	0.281	0.269	0.337	0.354	0.324	0.381	0.326	0.354	0.328	0.4	0.241	0.417	0.248	0.345	0.387	0.416
146	0.232	0.248	0.241	0.228	0.324	0.291	0.26	0.29	0.283	0.267	0.275	0.288	0.358	0.404	0.346	0.334		146	0.359	0.368	0.318	0.355	0.35	0.323	0.329	0.289	0.282	0.27	0.334	0.357	0.324	0.381	0.325	0.356	0.333	0.398	0.241	0.428	0.247	0.343	0.388	0.411
146.25	0.233	0.244	0.241	0.229	0.322	0.292	0.261	0.292	0.286	0.269	0.276	0.286	0.358	0.405	0.347	0.336		146.25	0.363	0.371	0.318	0.355	0.352	0.325	0.331	0.292	0.281	0.27	0.33	0.357	0.326	0.381	0.328	0.354	0.335	0.4	0.332	0.425	0.253	0.342	0.389	0.403
146.5	0.234	0.249	0.244	0.228	0.325	0.292	0.265	0.292	0.286	0.269	0.277	0.287	0.361	0.407	0.349	0.337		146.5	0.361	0.372	0.322	0.357	0.354	0.325	0.336	0.289	0.283	0.273	0.332	0.359	0.325	0.383	0.329	0.358	0.337	0.403	0.339	0.427	0.255	0.344	0.392	0.432
146.75	0.236	0.246	0.241	0.229	0.32	0.294	0.261	0.292	0.288	0.269	0.277	0.289	0.362	0.405	0.348	0.337		146.75	0.363	0.374	0.321	0.359	0.356	0.326	0.334	0.295	0.286	0.271	0.334	0.358	0.328	0.385	0.331	0.362	0.334	0.406	0.332	0.423	0.254	0.338	0.393	0.447
147	0.235	0.249	0.242	0.229	0.324	0.294	0.264	0.293	0.289	0.271	0.278	0.288	0.362	0.407	0.35	0.337		147	0.368	0.375	0.32	0.358	0.355	0.329	0.336	0.293	0.285	0.272	0.333	0.367	0.329	0.384	0.331	0.361	0.336	0.409	0.331	0.423	0.251	0.342	0.394	0.429
147.25	0.236	0.249	0.243	0.23	0.326	0.294	0.264	0.296	0.288	0.273	0.278	0.287	0.364	0.409	0.35	0.341		147.25	0.37	0.376	0.324	0.361	0.358	0.329	0.335	0.294	0.285	0.273	0.334	0.357	0.33	0.385	0.331	0.362	0.337	0.406	0.325	0.437	0.249	0.339	0.394	0.426
147.5	0.237	0.251	0.243	0.231	0.326	0.294	0.262	0.294	0.289	0.272	0.28	0.29	0.365	0.41	0.352	0.34		147.5	0.37	0.377	0.329	0.361	0.359	0.328	0.329	0.295	0.285	0.274	0.338	0.358	0.331	0.386	0.333	0.359	0.339	0.406	0.329	0.415	0.251	0.341	0.394	0.425
147.75	0.236	0.248	0.245	0.23	0.331	0.296	0.264	0.296	0.29	0.273	0.279	0.289	0.365	0.409	0.351	0.341		147.75	0.372	0.381	0.329	0.363	0.358	0.331	0.331	0.294	0.288	0.272	0.339	0.359	0.333	0.387	0.33	0.362	0.337	0.406	0.329	0.432	0.255	0.342	0.397	0.421
148	0.239	0.25	0.244	0.232	0.332	0.296	0.265	0.295	0.292	0.276	0.28	0.29	0.368	0.413	0.353	0.341		148	0.371	0.384	0.33	0.364	0.363	0.333	0.328	0.297	0.288	0.276	0.341	0.362	0.334	0.386	0.331	0.364	0.34	0.41	0.329	0.426	0.257	0.343	0.4	0.418
148.25	0.238	0.248	0.244	0.231	0.331	0.297	0.265	0.294	0.292	0.274	0.28	0.29	0.37	0.413	0.352	0.343		148.25	0.373	0.385	0.329	0.363	0.361	0.332	0.331	0.296	0.287	0.275	0.34	0.357	0.336	0.388	0.336	0.369	0.342	0.407	0.322	0.431	0.255	0.344	0.399	0.432
148.5	0.24	0.25	0.245	0.232	0.334	0.296	0.265	0.296	0.292	0.278	0.281	0.293	0.37	0.414	0.355	0.343		148.5	0.375	0.385	0.335	0.367	0.363	0.333	0.333	0.297	0.287	0.276	0.341	0.362	0.336	0.39	0.335	0.367	0.34	0.407	0.318	0.433	0.254	0.347	0.401	0.451
148.75	0.238	0.25	0.244	0.232	0.332	0.298	0.266	0.298	0.293	0.276	0.282	0.292	0.37	0.416	0.355	0.344		148.75	0.375	0.386	0.333	0.367	0.364	0.335	0.328	0.3	0.288	0.277	0.338	0.366	0.336	0.389	0.334	0.369	0.343	0.412	0.325	0.434	0.252	0.343	0.403	0.428
149	0.24	0.253	0.245	0.232	0.337	0.298	0.267	0.299	0.294	0.277	0.285	0.293	0.371	0.417	0.358	0.344		149	0.375	0.387	0.333	0.369	0.362	0.334	0.332	0.301	0.288	0.279	0.343	0.372	0.338	0.392	0.336	0.372	0.34	0.41	0.321	0.43	0.252	0.347	0.403	0.438
149.25	0.241	0.251	0.247	0.232	0.336	0.3	0.267	0.298	0.297	0.277	0.284	0.291	0.373	0.418	0.357	0.344		149.25	0.376	0.388	0.331	0.368	0.365	0.335	0.336	0.298	0.287	0.277	0.341	0.372	0.339	0.387	0.335	0.371	0.343	0.414	0.326	0.434	0.254	0.342	0.404	0.417
149.5	0.241	0.254	0.248	0.236	0.337	0.3	0.269	0.301	0.298	0.28	0.284	0.293	0.374	0.42	0.358	0.348		149.5	0.376	0.386	0.334	0.37	0.364	0.336	0.336	0.296	0.279	0.278	0.341	0.371	0.338	0.383	0.338	0.369	0.343	0.415	0.318	0.438	0.254	0.342	0.404	0.403
149.75	0.241	0.255	0.248	0.236	0.338	0.301	0.27	0.3	0.298	0.279	0.284	0.295	0.376	0.422	0.359	0.349		149.75	0.377	0.388	0.333	0.368	0.365	0.338	0.333	0.299	0.281	0.279	0.34	0.37	0.338	0.385	0.336	0.372	0.343	0.411	0.322	0.437	0.254	0.34	0.404	0.388
150	0.241	0.254	0.248	0.237	0.337	0.301	0.27	0.304	0.3	0.28	0.288	0.295	0.376	0.423	0.36	0.349		150	0.378	0.39	0.331	0.368	0.363	0.336	0.342	0.3	0.28	0.278	0.344	0.371	0.338	0.386	0.337	0.373	0.346	0.406	0.318	0.427	0.248	0.344	0.404	0.428
150.25	0.242	0.253	0.248	0.236	0.338	0.303	0.269	0.303	0.298	0.279	0.286	0.294	0.378	0.422	0.36	0.351		150.25	0.378	0.39	0.332	0.369	0.366	0.338	0.33	0.299	0.284	0.274	0.342	0.374	0.338	0.39	0.331	0.373	0.347	0.401	0.32	0.442	0.253	0.344	0.409	0.433
150.5	0.241	0.255	0.25	0.236	0.339	0.302	0.271	0.302	0.301	0.282	0.287	0.298	0.377	0.425	0.362	0.35		150.5	0.38	0.391	0.335	0.371	0.368	0.34	0.333	0.299	0.286	0.274	0.344	0.375	0.341	0.391	0.335	0.375	0.347	0.406	0.321	0.432	0.253	0.344	0.41	0.422
150.75	0.241	0.253	0.248	0.239	0.338	0.303	0.271	0.304	0.301	0.283	0.288	0.298	0.38	0.425	0.363	0.351		150.75	0.38	0.392	0.336	0.374	0.37	0.341	0.336	0.302	0.29	0.276	0.348	0.376	0.341	0.391	0.332	0.374	0.346	0.403	0.325	0.436	0.252	0.347	0.411	0.412
151	0.242	0.256	0.25	0.238	0.343	0.303	0.273	0.305	0.3	0.284	0.29	0.299	0.381	0.426	0.364	0.353		151	0.381	0.393	0.341	0.375	0.369	0.343	0.332	0.301	0.291	0.278	0.347	0.368	0.342	0.393	0.333	0.379	0.347	0.403	0.327	0.431	0.251	0.345	0.41	0.44
151.25	0.243	0.254	0.249	0.239	0.341	0.306	0.271	0.306	0.302	0.284	0.288	0.301	0.381	0.428	0.364	0.354		151.25	0.384	0.395	0.34	0.376	0.373	0.344	0.336	0.305	0.292	0.274	0.347	0.378	0.345	0.393	0.333	0.377	0.348	0.407	0.322	0.43	0.254	0.349	0.415	0.437
151.5	0.244	0.258	0.252	0.239	0.345	0.305	0.274	0.305	0.302	0.286	0.292	0.304	0.383	0.427	0.368	0.353		151.5	0.385	0.395	0.339	0.375	0.372	0.344	0.336	0.304	0.291	0.275	0.348	0.378	0.345	0.393	0.335	0.376	0.348	0.41	0.326	0.423	0.254	0.349	0.415	0.445
151.75	0.245	0.257	0.252	0.238	0.344	0.307	0.275	0.306	0.302	0.285	0.292	0.306	0.382	0.429	0.367	0.357		151.75	0.387	0.398	0.344	0.377	0.372	0.343	0.335	0.306	0.292	0.279	0.348	0.373	0.346	0.394	0.336	0.381	0.348	0.413	0.323	0.423	0.257	0.348	0.414	0.439
152	0.244	0.256	0.25	0.24	0.345	0.307	0.274	0.308	0.304	0.285	0.293	0.306	0.384	0.43	0.368	0.359		152	0.386	0.397	0.345	0.378	0.373	0.345	0.337	0.304	0.292	0.28	0.351	0.381	0.347	0.394	0.336	0.38	0.349	0.409	0.315	0.425	0.255	0.351	0.418	0.48
152.25	0.241	0.257	0.252	0.239	0.343	0.307	0.273	0.307	0.305	0.287	0.293	0.306	0.383	0.43	0.369	0.357		152.25	0.388	0.398	0.345	0.381	0.376	0.345	0.342	0.309	0.292	0.279	0.352	0.378	0.345	0.394	0.333	0.381	0.353	0.416	0.306	0.427	0.257	0.349	0.419	0.464
152.5	0.244	0.26	0.253	0.239	0.349	0.308	0.275	0.307	0.306	0.288	0.295	0.305	0.386	0.434	0.371	0.357		152.5	0.391	0.399	0.344	0.379	0.376	0.347	0.344	0.307	0.293	0.276	0.353	0.379	0.345	0.399	0.34	0.381	0.353	0.414	0.309	0.429	0.261	0.349	0.42	0.48
152.75	0.244	0.258	0.253	0.243	0.347	0.309	0.277	0.309	0.308	0.289	0.294	0.306	0.388	0.434	0.371	0.36		152.75	0.39	0.402	0.345	0.382	0.377	0.348	0.345	0.31	0.295	0.283	0.352	0.37	0.347	0.399	0.339	0.382	0.354	0.412	0.317	0.415	0.255	0.35	0.42	0.475
153	0.245	0.261	0.254	0.242	0.349	0.309	0.278	0.311	0.309	0.291	0.295	0.307	0.389	0.435	0.372	0.36		153	0.389	0.403	0.347	0.383	0.38	0.349	0.345	0.308	0.293	0.286	0.348	0.371	0.345	0.399	0.34	0.379	0.356	0.418	0.327	0.452	0.262	0.35	0.42	0.461
153.25	0.244	0.26	0.256	0.242	0.349	0.311	0.28	0.309	0.309	0.29	0.296	0.307	0.388	0.433	0.373	0.36		153.25	0.392	0.402	0.344	0.381	0.381	0.351	0.343	0.307	0.286	0.285	0.355	0.365	0.35	0.399	0.34	0.382	0.351	0.412	0.329	0.449	0.259	0.349	0.423	0.451
153.5	0.246	0.261	0.255	0.241	0.352	0.31	0.279	0.309	0.309	0.293	0.297	0.309	0.39	0.435	0.374	0.362		153.5	0.391	0.403	0.346	0.384	0.383	0.351	0.343	0.309	0.289	0.285	0.355	0.368	0.348	0.399	0.341	0.383	0.356	0.419	0.33	0.445	0.257	0.347	0.423	0.441
153.75	0.244	0.259	0.255	0.244	0.348	0.312	0.277	0.309	0.309	0.293	0.298	0.311	0.391	0.436	0.374	0.363		153.75	0.39	0.403	0.346	0.384	0.381	0.35	0.344	0.308	0.288	0.286	0.354	0.374	0.35	0.399	0.342	0.384	0.353	0.416	0.335	0.44	0.257	0.345	0.422	0.469
154	0.246	0.262	0.256	0.246	0.351	0.313	0.28	0.312	0.31	0.293	0.299	0.311	0.392	0.439	0.375	0.366		154	0.391	0.403	0.346	0.382	0.381	0.355	0.341	0.311	0.293	0.284	0.355	0.375	0.351	0.402	0.341	0.384	0.355	0.418	0.331	0.423	0.256	0.348	0.426	0.459
154.25	0.245	0.262	0.256	0.246	0.352	0.313	0.279	0.313	0.311	0.293	0.301	0.309	0.394	0.44	0.376	0.365		154.25	0.391	0.405	0.347	0.387	0.384	0.356	0.342	0.31	0.292	0.285	0.356	0.369	0.355	0.406	0.346	0.383	0.355	0.421	0.337	0.434	0.258	0.348	0.426	0.435
154.5	0.247	0.264	0.257	0.244	0.353	0.313	0.282	0.314	0.312	0.295	0.301	0.311	0.395	0.44	0.376	0.368		154.5	0.393	0.406	0.349	0.386	0.385	0.357	0.35	0.31	0.294	0.288	0.356	0.38	0.354	0.405	0.347	0.386	0.36	0.42	0.339	0.442	0.267	0.347	0.389	0.431
154.75	0.246	0.261	0.257	0.242	0.352	0.315	0.28	0.313	0.313	0.295	0.299	0.312	0.394	0.441	0.376	0.366		154.75	0.395	0.406	0.351	0.389	0.39	0.36	0.354	0.313	0.293	0.287	0.36	0.38	0.354	0.406	0.346	0.388	0.361	0.423	0.339	0.453	0.265	0.348	0.386	0.461
155	0.248	0.263	0.258	0.248	0.356	0.314	0.282	0.315	0.314	0.294	0.301	0.316	0.395	0.444	0.378	0.368		155	0.395	0.409	0.35	0.39	0.392	0.361	0.352	0.311	0.293	0.288	0.363	0.382	0.357	0.408	0.346	0.388	0.363	0.421	0.343	0.461	0.261	0.352	0.372	0.449
155.25	0.248	0.263	0.257	0.247	0.354	0.315	0.282	0.317	0.315	0.297	0.302	0.316	0.395	0.445	0.379	0.369		155.25	0.398	0.409	0.348	0.389	0.392	0.361	0.354	0.314	0.292	0.287	0.359	0.385	0.358	0.406	0.345	0.39	0.363	0.422	0.342	0.457	0.259	0.352	0.362	0.441
155.5	0.248	0.266	0.258	0.247	0.357	0.315	0.285	0.317	0.317	0.299	0.304	0.319	0.399	0.445	0.378	0.37		155.5	0.399	0.411	0.352	0.39	0.391	0.362	0.344	0.317	0.298	0.29	0.361	0.375	0.359	0.406	0.351	0.386	0.364	0.423	0.346	0.458	0.261	0.349	0.348	0.473
155.75	0.248	0.265	0.26	0.248	0.359	0.317	0.285	0.317	0.317	0.3	0.303	0.319	0.399	0.449	0.383	0.371		155.75	0.398	0.41	0.352	0.393	0.392	0.363	0.35	0.317	0.3	0.291	0.36	0.379	0.358	0.41	0.349	0.39	0.365	0.427	0.344	0.458	0.261	0.353	0.348	0.477
156	0.249	0.266	0.26	0.245	0.359	0.317	0.285	0.316	0.317	0.3	0.304	0.319	0.4	0.447	0.383	0.37		156	0.399	0.412	0.356	0.394	0.394	0.364	0.353	0.316	0.3	0.293	0.361	0.385	0.356	0.407	0.35	0.382	0.361	0.428	0.351	0.457	0.27	0.353	0.354	0.492
156.25	0.249	0.267	0.261	0.249	0.358	0.317	0.285	0.32	0.318	0.301	0.305	0.319	0.401	0.45	0.386	0.373		156.25	0.402	0.412	0.357	0.394	0.397	0.367	0.351	0.318	0.303	0.291	0.363	0.38	0.36	0.412	0.351	0.391	0.366	0.428	0.348	0.464	0.267	0.352	0.356	0.499
156.5	0.251	0.267	0.261	0.25	0.361	0.319	0.287	0.32	0.32	0.302	0.307	0.319	0.402	0.453	0.385	0.373		156.5	0.403	0.414	0.357	0.397	0.398	0.369	0.352	0.316	0.293	0.289	0.364	0.387	0.36	0.415	0.352	0.391	0.365	0.43	0.359	0.466	0.269	0.351	0.356	0.484
156.75	0.25	0.265	0.261	0.247	0.359	0.32	0.285	0.319	0.32	0.302	0.306	0.318	0.403	0.452	0.386	0.374		156.75	0.397	0.415	0.353	0.393	0.396	0.367	0.352	0.32	0.301	0.289	0.365	0.386	0.359	0.415	0.353	0.392	0.365	0.431	0.359	0.457	0.267	0.349	0.352	0.464
157	0.251	0.266	0.261	0.249	0.361	0.321	0.289	0.32	0.323	0.302	0.307	0.321	0.405	0.453	0.387	0.375		157	0.397	0.417	0.355	0.398	0.397	0.368	0.348	0.319	0.304	0.295	0.363	0.385	0.361	0.414	0.354	0.395	0.367	0.429	0.358	0.456	0.295	0.349	0.356	0.457
157.25	0.252	0.267	0.261	0.251	0.361	0.322	0.288	0.322	0.321	0.305	0.309	0.32	0.407	0.455	0.387	0.376		157.25	0.397	0.417	0.356	0.398	0.398	0.368	0.354	0.318	0.302	0.295	0.368	0.387	0.362	0.416	0.357	0.393	0.365	0.431	0.356	0.458	0.325	0.345	0.357	0.439
157.5	0.252	0.268	0.263	0.25	0.363	0.32	0.287	0.324	0.323	0.306	0.308	0.322	0.407	0.455	0.387	0.374		157.5	0.396	0.416	0.358	0.398	0.394	0.368	0.351	0.319	0.296	0.294	0.365	0.385	0.358	0.415	0.355	0.397	0.369	0.43	0.355	0.455	0.323	0.349	0.362	0.447
157.75	0.251	0.271	0.264	0.25	0.365	0.323	0.289	0.325	0.323	0.305	0.31	0.322	0.406	0.456	0.388	0.378		157.75	0.397	0.418	0.353	0.399	0.393	0.37	0.353	0.32	0.297	0.291	0.364	0.393	0.361	0.416	0.358	0.399	0.367	0.428	0.352	0.455	0.309	0.348	0.355	0.491
158	0.254	0.269	0.263	0.25	0.365	0.322	0.289	0.323	0.325	0.306	0.311	0.325	0.408	0.457	0.39	0.379		158	0.399	0.418	0.356	0.398	0.394	0.368	0.352	0.315	0.297	0.293	0.367	0.39	0.361	0.419	0.356	0.397	0.366	0.432	0.358	0.456	0.311	0.348	0.358	0.483
158.25	0.253	0.269	0.263	0.251	0.364	0.324	0.291	0.321	0.326	0.306	0.311	0.326	0.409	0.457	0.39	0.38		158.25	0.397	0.42	0.356	0.401	0.396	0.371	0.351	0.32	0.298	0.289	0.366	0.385	0.362	0.419	0.357	0.404	0.369	0.433	0.357	0.449	0.301	0.345	0.359	0.483
158.5	0.253	0.272	0.265	0.253	0.368	0.324	0.293	0.326	0.327	0.309	0.313	0.33	0.41	0.459	0.392	0.381		158.5	0.402	0.422	0.356	0.401	0.396	0.372	0.351	0.322	0.297	0.293	0.369	0.387	0.365	0.42	0.358	0.403	0.372	0.435	0.354	0.455	0.303	0.349	0.359	0.481
158.75	0.253	0.27	0.266	0.251	0.367	0.326	0.293	0.326	0.327	0.308	0.314	0.329	0.411	0.462	0.392	0.383		158.75	0.408	0.421	0.358	0.404	0.399	0.375	0.358	0.323	0.297	0.295	0.37	0.39	0.362	0.42	0.36	0.403	0.373	0.435	0.358	0.455	0.304	0.346	0.374	0.451
159	0.254	0.27	0.265	0.252	0.366	0.326	0.293	0.326	0.327	0.309	0.314	0.328	0.413	0.463	0.391	0.384		159	0.411	0.422	0.362	0.406	0.397	0.374	0.358	0.32	0.299	0.296	0.366	0.39	0.362	0.425	0.359	0.402	0.37	0.439	0.364	0.451	0.299	0.342	0.364	0.431
159.25	0.253	0.272	0.266	0.251	0.369	0.326	0.295	0.327	0.328	0.309	0.312	0.329	0.413	0.463	0.394	0.382		159.25	0.411	0.422	0.363	0.406	0.402	0.376	0.356	0.324	0.302	0.297	0.369	0.388	0.367	0.425	0.362	0.406	0.374	0.438	0.36	0.451	0.302	0.348	0.363	0.478
159.5	0.254	0.274	0.267	0.253	0.369	0.327	0.294	0.331	0.329	0.311	0.316	0.329	0.414	0.466	0.395	0.386		159.5	0.414	0.425	0.363	0.407	0.403	0.376	0.349	0.323	0.304	0.296	0.367	0.389	0.365	0.429	0.362	0.402	0.376	0.439	0.363	0.454	0.306	0.34	0.356	0.466
159.75	0.254	0.274	0.268	0.252	0.37	0.328	0.295	0.33	0.329	0.31	0.314	0.328	0.416	0.468	0.397	0.387		159.75	0.413	0.427	0.362	0.41	0.401	0.378	0.354	0.326	0.301	0.298	0.368	0.39	0.365	0.43	0.361	0.403	0.371	0.44	0.362	0.458	0.301	0.348	0.347	0.478
160	0.253	0.275	0.267	0.253	0.372	0.329	0.295	0.332	0.331	0.313	0.317	0.329	0.418	0.466	0.396	0.388		160	0.411	0.428	0.365	0.41	0.405	0.377	0.348	0.325	0.305	0.301	0.37	0.392	0.367	0.431	0.363	0.406	0.377	0.441	0.363	0.45	0.3	0.35	0.346	0.494
160.25	0.256	0.275	0.268	0.255	0.374	0.33	0.298	0.331	0.331	0.314	0.316	0.328	0.419	0.468	0.398	0.388
160.5	0.256	0.276	0.268	0.255	0.375	0.33	0.297	0.334	0.334	0.315	0.316	0.333	0.421	0.47	0.4	0.39
160.75	0.255	0.276	0.269	0.255	0.375	0.331	0.296	0.332	0.332	0.317	0.317	0.334	0.421	0.473	0.399	0.391
161	0.256	0.276	0.268	0.256	0.374	0.331	0.297	0.334	0.334	0.316	0.317	0.334	0.424	0.473	0.4	0.391
161.25	0.255	0.276	0.27	0.256	0.377	0.332	0.3	0.334	0.335	0.317		0.336	0.423	0.473	0.4	0.393
161.5	0.258	0.277	0.271	0.255	0.378	0.331	0.298	0.335	0.337	0.317			0.425	0.474	0.402	0.394
161.75	0.257	0.276	0.27	0.257	0.373	0.332	0.299	0.333	0.338	0.319			0.428	0.475	0.402	0.393
162	0.257	0.276	0.271	0.255	0.378	0.333	0.3	0.336	0.337	0.32			0.428	0.478	0.402	0.394
162.25	0.258	0.279	0.272	0.256	0.379	0.334	0.3	0.335	0.337	0.322			0.428	0.476	0.403	0.395
162.5	0.259	0.278	0.271	0.256	0.378	0.334	0.3	0.337	0.34	0.321			0.43	0.479	0.403	0.398
162.75	0.26	0.276	0.272	0.255	0.378		0.302	0.335	0.341	0.324			0.432	0.478	0.403	0.397
163	0.259			0.256				0.337	0.34	0.323			0.432	0.482		0.398
163.25	0.26								0.341	0.324			0.433
163.5	0.259								0.342	0.323			0.436
163.75	0.259								0.344	0.324			0.436
164	0.259								0.344	0.327			0.437
164.25	0.26								0.346	0.325			0.438
164.5	0.261								0.347	0.326			0.44
164.75	0.262								0.347	0.327			0.441
165	0.262								0.348	0.329			0.443
165.25	0.263								0.349	0.327			0.443
165.5	0.263								0.349	0.329			0.445
165.75									0.35	0.33
166
166.25
166.5
166.75
167
167.25

## Sheet: Fig_4B
Final OD730nm	LL50										HL700										FL0
		LT	pam68S113G	AtPAM68oe	AtPAM68S140Goe	ins0933	AtPAM68oe/ins0933	AtPAM68S140Goe/ins0933				LT	pam68S113G	AtPAM68oe	AtPAM68S140Goe	ins0933	AtPAM68oe/ins0933	AtPAM68S140Goe/ins0933				LT	pam68S113G	AtPAM68oe	AtPAM68S140Goe	ins0933	AtPAM68oe/ins0933	AtPAM68S140Goe/ins0933
	rep-1	1.58	2.31	1.91	1.91	1.65	1.33	1.1			rep-1	0.36	2.33	0.96	1.14	3.09	5.69	2.85			rep-1	0.348	0.641	0.314	0.305	0.477	0.435	0.401
	rep-2	1.82	2.07	1.66	1.74	1.82	1.57	1.34			rep-2	0.435	1.92	0.97	1.23	1.78	5.83	2.32			rep-2	0.33	0.475	0.338	0.287	0.369	0.451	0.32
	rep-3	1.92	2.43	1.92	1.97	2.05	1.83	1.46			rep-3	0.456	0.91	0.9	1.2	1.92	5.87	2.46			rep-3	0.321	0.509	0.287	0.301	0.4	0.371	0.291
	rep-4	1.64	2.4	1.89	1.61	2.1	1.6	1.62			rep-4	0.449	1	1.05	1.02	1.99	6.4	2.46
		LT	pam68S113G	AtPAM68oe	AtPAM68S140Goe	ins0933	AtPAM68oe/ins0933	AtPAM68S140Goe/ins0933				LT	pam68S113G	AtPAM68oe	AtPAM68S140Goe	ins0933	AtPAM68oe/ins0933	AtPAM68S140Goe/ins0933				LT	pam68S113G	AtPAM68oe	AtPAM68S140Goe	ins0933	AtPAM68oe/ins0933	AtPAM68S140Goe/ins0933
Statistics	LT		0.00254981	0.335084	0.574109					Statistics	LT		0.0187538	7.11194e-06	8.11481e-06					Statistics	LT		0.0151993	0.298015	0.0214235
*** p≤0.001	pam68S113G			0.00425931	0.00519338					*** p≤0.001	pam68S113G			0.154339	0.306895					*** p≤0.001	pam68S113G			0.0122836	0.00870016
** p≤0.01	AtPAM68oe				0.72754					** p≤0.01	AtPAM68oe				0.0189608					** p≤0.01	AtPAM68oe				0.384295
* p≤0.05	AtPAM68S140Goe									* p≤0.05	AtPAM68S140Goe									* p≤0.05	AtPAM68S140Goe
insignificant	ins0933						0.0696525	0.0133666		insignificant	ins0933						3.25469e-05	0.348855		insignificant	ins0933						0.931963	0.165057
	AtPAM68oe/ins0933							0.225319			AtPAM68oe/ins0933							2.05615e-06			AtPAM68oe/ins0933							0.117182
	AtPAM68S140Goe/ins0933										AtPAM68S140Goe/ins0933										AtPAM68S140Goe/ins0933
	Average	1.74	2.3025	1.845	1.8075	1.905	1.5825	1.38			Average	0.425	1.54	0.97	1.1475	2.195	5.9475	2.5225			Average	0.333	0.541667	0.313	0.297667	0.415333	0.419	0.337333
	SD	0.15748	0.163172	0.123962	0.163783	0.209205	0.204512	0.219089			SD	0.0442041	0.696898	0.0616441	0.0928709	0.60302	0.311381	0.22809			SD	0.0137477	0.0876888	0.0255147	0.00945163	0.0556088	0.042332	0.0570117
	% to LT	1	1.32328	1.06034	1.03879	1.09483	0.909483	0.793103			% to LT	1	3.62353	2.28235	2.7	5.16471	13.9941	5.93529			% to LT	1	1.62663	0.93994	0.893894	1.24725	1.25826	1.01301
	Median	1.73	2.355	1.9	1.825	1.935	1.585	1.4			Median	0.442	1.46	0.965	1.17	1.955	5.85	2.46			Median	0.33	0.509	0.314	0.301	0.4	0.435	0.32
	Q1	1.595	2.13	1.7175	1.6425	1.6925	1.39	1.16			Q1	0.37875	0.9325	0.915	1.05	1.815	5.725	2.355			Q1	0.321	0.475	0.287	0.287	0.369	0.371	0.291
	Q3	1.895	2.4225	1.9175	1.955	2.0875	1.7725	1.58			Q3	0.45425	2.2275	1.03	1.2225	2.815	6.2675	2.7525			Q3	0.348	0.641	0.338	0.305	0.477	0.451	0.401
	1.5×IQR	0.45	0.43875	0.3	0.46875	0.5925	0.57375	0.63			1.5×IQR	0.11325	1.9425	0.1725	0.25875	1.5	0.81375	0.59625			1.5×IQR	0.0405	0.249	0.0765	0.027	0.162	0.12	0.165

## Sheet: Fig_4C
	under LL50																														under HL700
genotype	LT				pam68S113G				AtPAM68oe				AtPAM68S140Goe				ins0933				AtPAM68oe/ins0933				AtPAM68S140Goe/ins0933					genotype	LT				pam68S113G				AtPAM68oe				AtPAM68S140Goe				ins0933
replicate #	1	2	3	4	1	2	3	4	1	2	3	4	1	2	3	4	1	2	3	4	1	2	3	4	1	2	3	4		replicate #	1	2	3	4	1	2	3	4	1	2	3	4	1	2	3	4	1	2	3
time[h]																														time[h]
0	0.085	0.084	0.079	0.079	0.069	0.079	0.069	0.083	0.075	0.07	0.069	0.077	0.08	0.072	0.066	0.074	0.127	0.134	0.124	0.029	0.086	0.083	0.084	0.043	0.072	0.072	0.071	0.041		0	0.028	0.034	0.04	0.073	0.035	0.045	0.033	0.069	0.041	0.042	0.037	0.062	0.037	0.04	0.034	0.066	0.027	0.034	0.016
0.25	0.086	0.085	0.08	0.082	0.073	0.079	0.071	0.087	0.076	0.07	0.068	0.079	0.082	0.074	0.069	0.076	0.127	0.135	0.125	0.032	0.086	0.085	0.085	0.045	0.075	0.072	0.072	0.043		0.25	0.03	0.034	0.042	0.073	0.036	0.047	0.039	0.066	0.043	0.043	0.039	0.061	0.04	0.043	0.037	0.067	0.028	0.036	0.025
0.5	0.086	0.085	0.08	0.08	0.071	0.08	0.068	0.085	0.077	0.071	0.071	0.08	0.083	0.075	0.069	0.076	0.128	0.135	0.126	0.032	0.085	0.085	0.085	0.046	0.074	0.072	0.073	0.044		0.5	0.034	0.035	0.045	0.074	0.039	0.048	0.041	0.067	0.046	0.045	0.041	0.063	0.043	0.045	0.038	0.07	0.03	0.038	0.026
0.75	0.088	0.085	0.081	0.084	0.074	0.079	0.068	0.09	0.078	0.073	0.07	0.08	0.085	0.076	0.07	0.079	0.128	0.136	0.126	0.032	0.086	0.086	0.086	0.045	0.077	0.072	0.074	0.043		0.75	0.035	0.037	0.046	0.077	0.039	0.049	0.043	0.068	0.048	0.046	0.043	0.065	0.044	0.046	0.04	0.072	0.031	0.039	0.028
1	0.095	0.086	0.081	0.083	0.095	0.078	0.066	0.089	0.082	0.072	0.071	0.08	0.089	0.076	0.071	0.079	0.132	0.136	0.127	0.034	0.092	0.086	0.086	0.046	0.08	0.072	0.073	0.045		1	0.037	0.038	0.048	0.078	0.041	0.051	0.044	0.068	0.05	0.049	0.045	0.066	0.046	0.048	0.042	0.073	0.032	0.039	0.028
1.25	0.096	0.086	0.082	0.086	0.097	0.078	0.071	0.092	0.083	0.073	0.072	0.081	0.09	0.077	0.072	0.08	0.133	0.135	0.128	0.034	0.092	0.086	0.087	0.048	0.081	0.071	0.076	0.045		1.25	0.04	0.041	0.047	0.081	0.043	0.052	0.043	0.07	0.052	0.049	0.044	0.068	0.05	0.049	0.041	0.075	0.036	0.041	0.028
1.5	0.096	0.087	0.089	0.085	0.103	0.08	0.088	0.091	0.084	0.074	0.075	0.084	0.092	0.079	0.076	0.081	0.134	0.137	0.131	0.034	0.094	0.086	0.092	0.049	0.082	0.073	0.079	0.046		1.5	0.041	0.042	0.05	0.082	0.045	0.054	0.044	0.072	0.054	0.05	0.046	0.071	0.051	0.051	0.043	0.076	0.038	0.042	0.03
1.75	0.1	0.086	0.089	0.088	0.11	0.078	0.088	0.094	0.086	0.075	0.075	0.085	0.093	0.078	0.076	0.082	0.137	0.137	0.131	0.035	0.096	0.087	0.094	0.048	0.085	0.073	0.08	0.047		1.75	0.045	0.042	0.05	0.081	0.047	0.054	0.046	0.072	0.056	0.051	0.047	0.071	0.054	0.052	0.045	0.076	0.038	0.043	0.03
2	0.096	0.092	0.09	0.087	0.097	0.093	0.093	0.094	0.084	0.076	0.077	0.087	0.092	0.081	0.078	0.085	0.136	0.14	0.133	0.037	0.092	0.089	0.094	0.05	0.084	0.076	0.08	0.048		2	0.045	0.043	0.054	0.085	0.047	0.056	0.047	0.074	0.057	0.051	0.051	0.075	0.054	0.052	0.048	0.081	0.04	0.044	0.034
2.25	0.094	0.095	0.092	0.089	0.088	0.104	0.096	0.094	0.084	0.078	0.077	0.089	0.091	0.083	0.077	0.088	0.133	0.142	0.133	0.037	0.091	0.092	0.096	0.051	0.081	0.078	0.081	0.048		2.25	0.045	0.045	0.054	0.087	0.047	0.055	0.048	0.077	0.059	0.053	0.051	0.078	0.055	0.054	0.048	0.082	0.04	0.044	0.034
2.5	0.092	0.095	0.092	0.09	0.086	0.106	0.094	0.097	0.084	0.079	0.079	0.088	0.091	0.084	0.078	0.088	0.134	0.144	0.135	0.039	0.091	0.094	0.096	0.051	0.08	0.082	0.082	0.051		2.5	0.046	0.044	0.058	0.09	0.048	0.056	0.051	0.078	0.059	0.053	0.054	0.081	0.056	0.054	0.052	0.084	0.04	0.045	0.037
2.75	0.093	0.095	0.092	0.092	0.086	0.105	0.093	0.098	0.085	0.08	0.078	0.088	0.092	0.084	0.079	0.088	0.134	0.144	0.135	0.039	0.09	0.094	0.096	0.052	0.081	0.081	0.082	0.051		2.75	0.045	0.046	0.059	0.091	0.05	0.058	0.051	0.08	0.06	0.054	0.056	0.084	0.055	0.055	0.053	0.087	0.041	0.046	0.039
3	0.093	0.093	0.092	0.091	0.088	0.094	0.094	0.098	0.084	0.079	0.078	0.089	0.092	0.084	0.079	0.087	0.135	0.141	0.135	0.038	0.091	0.093	0.096	0.053	0.081	0.081	0.084	0.048		3	0.044	0.049	0.061	0.092	0.047	0.06	0.052	0.08	0.06	0.056	0.057	0.085	0.056	0.058	0.055	0.088	0.041	0.049	0.041
3.25	0.093	0.092	0.091	0.091	0.085	0.09	0.092	0.099	0.084	0.079	0.079	0.088	0.092	0.084	0.079	0.087	0.134	0.141	0.136	0.04	0.091	0.091	0.096	0.053	0.081	0.078	0.082	0.051		3.25	0.044	0.052	0.063	0.095	0.049	0.062	0.054	0.08	0.061	0.058	0.059	0.087	0.057	0.061	0.057	0.09	0.042	0.052	0.041
3.5	0.093	0.092	0.091	0.093	0.085	0.093	0.085	0.102	0.086	0.078	0.079	0.088	0.092	0.083	0.079	0.087	0.136	0.141	0.134	0.04	0.093	0.091	0.095	0.052	0.081	0.078	0.082	0.05		3.5	0.046	0.052	0.063	0.095	0.05	0.062	0.054	0.082	0.063	0.059	0.06	0.087	0.058	0.06	0.058	0.091	0.044	0.051	0.044
3.75	0.094	0.092	0.089	0.092	0.085	0.088	0.084	0.101	0.086	0.078	0.079	0.088	0.093	0.083	0.079	0.088	0.136	0.143	0.135	0.04	0.092	0.091	0.094	0.053	0.082	0.08	0.081	0.053		3.75	0.047	0.054	0.066	0.097	0.05	0.065	0.056	0.083	0.064	0.06	0.062	0.09	0.06	0.063	0.06	0.092	0.045	0.053	0.044
4	0.094	0.092	0.089	0.093	0.085	0.09	0.079	0.101	0.087	0.078	0.078	0.089	0.094	0.083	0.079	0.088	0.137	0.142	0.135	0.041	0.092	0.092	0.093	0.053	0.082	0.079	0.081	0.052		4	0.046	0.055	0.064	0.096	0.052	0.065	0.054	0.082	0.064	0.061	0.062	0.089	0.06	0.063	0.06	0.091	0.045	0.054	0.044
4.25	0.093	0.093	0.091	0.094	0.084	0.092	0.083	0.103	0.087	0.08	0.079	0.089	0.093	0.084	0.08	0.089	0.136	0.144	0.137	0.042	0.091	0.093	0.095	0.054	0.083	0.081	0.081	0.054		4.25	0.047	0.053	0.064	0.097	0.051	0.064	0.055	0.082	0.064	0.062	0.062	0.088	0.06	0.063	0.06	0.093	0.046	0.053	0.042
4.5	0.094	0.092	0.091	0.095	0.085	0.089	0.081	0.104	0.087	0.08	0.08	0.09	0.094	0.084	0.08	0.088	0.137	0.143	0.136	0.04	0.093	0.091	0.095	0.055	0.084	0.08	0.08	0.053		4.5	0.047	0.052	0.065	0.097	0.053	0.064	0.056	0.083	0.065	0.061	0.061	0.087	0.062	0.062	0.06	0.093	0.046	0.053	0.043
4.75	0.095	0.094	0.091	0.096	0.085	0.09	0.083	0.104	0.087	0.08	0.08	0.091	0.094	0.084	0.081	0.09	0.138	0.143	0.137	0.044	0.094	0.093	0.096	0.056	0.084	0.081	0.083	0.053		4.75	0.048	0.053	0.066	0.097	0.054	0.065	0.056	0.085	0.065	0.061	0.063	0.088	0.062	0.065	0.061	0.095	0.049	0.053	0.044
5	0.095	0.094	0.092	0.097	0.087	0.091	0.083	0.106	0.088	0.08	0.081	0.091	0.096	0.085	0.082	0.09	0.139	0.145	0.137	0.044	0.096	0.094	0.097	0.056	0.084	0.082	0.083	0.054		5	0.048	0.055	0.066	0.099	0.054	0.065	0.058	0.084	0.065	0.062	0.064	0.089	0.062	0.064	0.064	0.094	0.048	0.054	0.045
5.25	0.095	0.094	0.093	0.096	0.086	0.091	0.083	0.106	0.089	0.08	0.081	0.092	0.096	0.086	0.082	0.09	0.139	0.145	0.138	0.045	0.094	0.094	0.097	0.058	0.084	0.081	0.084	0.056		5.25	0.047	0.056	0.067	0.099	0.053	0.067	0.058	0.084	0.066	0.063	0.063	0.09	0.062	0.066	0.063	0.095	0.048	0.054	0.046
5.5	0.092	0.094	0.091	0.098	0.079	0.087	0.081	0.106	0.089	0.081	0.081	0.091	0.096	0.086	0.083	0.089	0.138	0.144	0.137	0.045	0.094	0.093	0.098	0.058	0.083	0.082	0.083	0.057		5.5	0.046	0.055	0.068	0.1	0.054	0.065	0.058	0.086	0.067	0.063	0.065	0.09	0.062	0.065	0.063	0.096	0.05	0.055	0.043
5.75	0.099	0.094	0.093	0.098	0.1	0.089	0.082	0.107	0.091	0.081	0.082	0.094	0.099	0.087	0.083	0.09	0.142	0.145	0.139	0.044	0.099	0.093	0.098	0.058	0.088	0.082	0.083	0.056		5.75	0.049	0.057	0.067	0.101	0.054	0.067	0.058	0.086	0.067	0.065	0.064	0.091	0.064	0.066	0.064	0.098	0.051	0.059	0.044
6	0.102	0.096	0.092	0.099	0.107	0.093	0.079	0.108	0.093	0.082	0.082	0.092	0.1	0.087	0.083	0.092	0.142	0.146	0.138	0.047	0.1	0.094	0.099	0.06	0.09	0.082	0.084	0.059		6	0.05	0.058	0.068	0.101	0.057	0.069	0.058	0.087	0.068	0.066	0.065	0.093	0.066	0.069	0.064	0.098	0.052	0.058	0.045
6.25	0.103	0.096	0.096	0.1	0.109	0.091	0.092	0.109	0.093	0.083	0.084	0.095	0.102	0.088	0.087	0.092	0.143	0.145	0.141	0.049	0.1	0.096	0.101	0.061	0.091	0.083	0.087	0.058		6.25	0.049	0.058	0.069	0.102	0.056	0.067	0.059	0.087	0.068	0.065	0.065	0.093	0.066	0.067	0.065	0.099	0.052	0.057	0.045
6.5	0.102	0.093	0.097	0.101	0.105	0.083	0.093	0.11	0.094	0.081	0.086	0.096	0.101	0.086	0.086	0.09	0.143	0.145	0.141	0.049	0.1	0.094	0.102	0.062	0.09	0.081	0.087	0.06		6.5	0.051	0.06	0.068	0.103	0.058	0.069	0.059	0.088	0.069	0.067	0.069	0.092	0.067	0.07	0.066	0.099	0.053	0.06	0.047
6.75	0.099	0.095	0.098	0.101	0.096	0.089	0.093	0.109	0.093	0.082	0.085	0.096	0.1	0.089	0.088	0.092	0.144	0.147	0.141	0.048	0.098	0.096	0.102	0.062	0.089	0.082	0.089	0.06		6.75	0.054	0.059	0.071	0.104	0.059	0.069	0.06	0.089	0.07	0.067	0.068	0.095	0.068	0.069	0.069	0.101	0.055	0.058	0.047
7	0.098	0.098	0.103	0.102	0.093	0.097	0.112	0.111	0.092	0.084	0.088	0.1	0.1	0.091	0.09	0.094	0.142	0.149	0.145	0.048	0.098	0.098	0.108	0.061	0.087	0.086	0.093	0.06		7	0.054	0.059	0.071	0.104	0.059	0.07	0.061	0.09	0.072	0.067	0.071	0.097	0.068	0.071	0.07	0.102	0.056	0.059	0.051
7.25	0.1	0.099	0.103	0.102	0.095	0.1	0.107	0.11	0.094	0.085	0.089	0.1	0.101	0.092	0.091	0.095	0.143	0.148	0.145	0.048	0.098	0.098	0.106	0.061	0.09	0.085	0.092	0.059		7.25	0.052	0.06	0.071	0.106	0.059	0.07	0.062	0.09	0.071	0.069	0.071	0.099	0.068	0.07	0.069	0.103	0.055	0.06	0.05
7.5	0.099	0.1	0.104	0.102	0.093	0.1	0.111	0.111	0.093	0.085	0.089	0.101	0.101	0.092	0.091	0.095	0.143	0.149	0.146	0.048	0.099	0.099	0.108	0.062	0.089	0.087	0.093	0.06		7.5	0.053	0.061	0.073	0.107	0.059	0.07	0.063	0.091	0.071	0.069	0.074	0.1	0.069	0.072	0.071	0.103	0.056	0.059	0.051
7.75	0.1	0.099	0.099	0.101	0.094	0.1	0.096	0.111	0.094	0.086	0.088	0.099	0.101	0.092	0.089	0.095	0.143	0.149	0.143	0.047	0.099	0.099	0.103	0.062	0.09	0.087	0.09	0.061		7.75	0.053	0.06	0.073	0.106	0.059	0.071	0.063	0.092	0.071	0.07	0.073	0.102	0.07	0.073	0.071	0.104	0.055	0.062	0.051
8	0.099	0.099	0.097	0.102	0.09	0.101	0.092	0.11	0.094	0.086	0.087	0.098	0.101	0.093	0.088	0.096	0.144	0.15	0.144	0.046	0.098	0.1	0.104	0.062	0.089	0.088	0.089	0.06		8	0.055	0.061	0.073	0.108	0.06	0.071	0.064	0.094	0.072	0.07	0.074	0.105	0.07	0.073	0.073	0.107	0.057	0.063	0.052
8.25	0.1	0.101	0.099	0.104	0.094	0.102	0.093	0.112	0.094	0.086	0.088	0.098	0.102	0.093	0.088	0.097	0.145	0.15	0.144	0.048	0.1	0.101	0.104	0.062	0.09	0.089	0.091	0.062		8.25	0.054	0.063	0.076	0.109	0.059	0.071	0.064	0.094	0.072	0.072	0.075	0.105	0.071	0.075	0.074	0.106	0.058	0.062	0.054
8.5	0.101	0.099	0.098	0.104	0.092	0.098	0.09	0.113	0.096	0.087	0.088	0.098	0.103	0.092	0.089	0.097	0.144	0.15	0.143	0.049	0.1	0.099	0.103	0.062	0.09	0.087	0.09	0.061		8.5	0.054	0.064	0.074	0.11	0.061	0.072	0.064	0.092	0.072	0.072	0.074	0.103	0.071	0.076	0.074	0.105	0.056	0.064	0.052
8.75	0.1	0.097	0.098	0.104	0.091	0.093	0.091	0.114	0.096	0.086	0.087	0.099	0.102	0.091	0.09	0.096	0.144	0.149	0.143	0.05	0.099	0.098	0.104	0.062	0.09	0.086	0.089	0.061		8.75	0.054	0.065	0.074	0.111	0.06	0.075	0.064	0.093	0.073	0.074	0.075	0.102	0.072	0.076	0.073	0.107	0.057	0.065	0.051
9	0.099	0.097	0.099	0.104	0.09	0.093	0.092	0.113	0.095	0.087	0.089	0.099	0.103	0.091	0.091	0.096	0.145	0.149	0.144	0.049	0.1	0.097	0.105	0.064	0.091	0.086	0.09	0.062		9	0.055	0.066	0.076	0.11	0.06	0.075	0.063	0.093	0.073	0.074	0.074	0.101	0.073	0.076	0.073	0.107	0.059	0.065	0.052
9.25	0.1	0.098	0.098	0.104	0.091	0.093	0.09	0.114	0.096	0.088	0.089	0.099	0.102	0.091	0.09	0.096	0.144	0.149	0.144	0.051	0.1	0.098	0.106	0.064	0.09	0.086	0.09	0.064		9.25	0.055	0.066	0.076	0.112	0.061	0.074	0.065	0.094	0.073	0.074	0.075	0.102	0.072	0.077	0.073	0.108	0.058	0.066	0.053
9.5	0.101	0.098	0.099	0.104	0.093	0.095	0.091	0.114	0.097	0.087	0.088	0.101	0.104	0.091	0.09	0.096	0.146	0.15	0.145	0.051	0.1	0.099	0.104	0.065	0.092	0.087	0.091	0.064		9.5	0.055	0.066	0.076	0.111	0.063	0.076	0.065	0.094	0.073	0.075	0.074	0.102	0.073	0.077	0.073	0.107	0.06	0.067	0.053
9.75	0.102	0.098	0.099	0.106	0.091	0.092	0.089	0.117	0.097	0.087	0.09	0.099	0.104	0.091	0.091	0.096	0.146	0.149	0.144	0.053	0.1	0.098	0.103	0.065	0.091	0.086	0.09	0.064		9.75	0.054	0.067	0.076	0.112	0.061	0.076	0.065	0.096	0.075	0.076	0.074	0.104	0.073	0.078	0.075	0.109	0.059	0.068	0.052
10	0.101	0.097	0.099	0.106	0.091	0.09	0.087	0.116	0.097	0.089	0.089	0.099	0.104	0.091	0.091	0.095	0.145	0.15	0.144	0.054	0.101	0.098	0.105	0.067	0.091	0.087	0.091	0.065		10	0.055	0.067	0.077	0.112	0.062	0.077	0.066	0.095	0.075	0.075	0.075	0.102	0.074	0.078	0.075	0.109	0.062	0.068	0.054
10.25	0.102	0.098	0.098	0.106	0.092	0.091	0.087	0.116	0.097	0.089	0.088	0.099	0.104	0.091	0.091	0.096	0.145	0.15	0.145	0.055	0.1	0.099	0.105	0.066	0.09	0.086	0.09	0.065		10.25	0.054	0.068	0.078	0.113	0.062	0.077	0.069	0.096	0.074	0.077	0.077	0.104	0.073	0.079	0.077	0.109	0.061	0.067	0.054
10.5	0.1	0.098	0.1	0.107	0.09	0.091	0.089	0.117	0.098	0.089	0.089	0.101	0.104	0.092	0.092	0.097	0.145	0.151	0.146	0.054	0.101	0.099	0.105	0.067	0.09	0.087	0.091	0.067		10.5	0.055	0.066	0.081	0.112	0.063	0.076	0.068	0.096	0.075	0.076	0.077	0.102	0.074	0.078	0.078	0.109	0.062	0.068	0.055
10.75	0.101	0.102	0.1	0.108	0.092	0.095	0.088	0.118	0.097	0.091	0.089	0.101	0.104	0.093	0.092	0.097	0.146	0.152	0.145	0.054	0.101	0.101	0.107	0.068	0.092	0.088	0.091	0.067		10.75	0.056	0.068	0.082	0.114	0.064	0.077	0.07	0.098	0.076	0.077	0.078	0.104	0.074	0.079	0.078	0.111	0.063	0.07	0.055
11	0.107	0.102	0.1	0.108	0.11	0.096	0.088	0.119	0.1	0.091	0.09	0.102	0.107	0.093	0.093	0.099	0.151	0.152	0.146	0.056	0.106	0.103	0.105	0.067	0.097	0.089	0.091	0.066		11	0.057	0.069	0.08	0.114	0.064	0.078	0.068	0.099	0.076	0.077	0.078	0.106	0.076	0.079	0.077	0.112	0.065	0.07	0.055
11.25	0.108	0.103	0.105	0.11	0.114	0.101	0.101	0.12	0.101	0.092	0.092	0.104	0.108	0.093	0.095	0.098	0.15	0.153	0.149	0.052	0.107	0.102	0.109	0.067	0.097	0.09	0.093	0.064		11.25	0.06	0.069	0.081	0.115	0.067	0.08	0.07	0.098	0.079	0.077	0.078	0.106	0.078	0.081	0.078	0.112	0.066	0.071	0.057
11.5	0.112	0.103	0.106	0.109	0.125	0.104	0.104	0.12	0.103	0.091	0.093	0.105	0.11	0.095	0.096	0.101	0.153	0.153	0.15	0.054	0.111	0.103	0.11	0.068	0.101	0.09	0.094	0.067		11.5	0.059	0.068	0.082	0.116	0.067	0.079	0.071	0.099	0.079	0.078	0.08	0.107	0.079	0.08	0.08	0.114	0.068	0.071	0.057
11.75	0.106	0.106	0.105	0.112	0.106	0.103	0.106	0.121	0.101	0.092	0.093	0.105	0.107	0.095	0.096	0.101	0.15	0.155	0.15	0.056	0.106	0.104	0.11	0.068	0.096	0.091	0.096	0.067		11.75	0.061	0.071	0.083	0.118	0.07	0.08	0.073	0.102	0.079	0.081	0.081	0.11	0.08	0.081	0.081	0.115	0.069	0.074	0.059
12	0.105	0.106	0.109	0.11	0.101	0.106	0.112	0.12	0.1	0.094	0.094	0.107	0.107	0.095	0.097	0.101	0.151	0.157	0.151	0.057	0.105	0.105	0.114	0.07	0.095	0.092	0.098	0.068		12	0.061	0.071	0.084	0.12	0.07	0.082	0.073	0.104	0.079	0.081	0.08	0.112	0.079	0.082	0.083	0.118	0.07	0.072	0.058
12.25	0.105	0.107	0.111	0.111	0.103	0.11	0.116	0.123	0.099	0.093	0.095	0.108	0.107	0.095	0.1	0.102	0.151	0.156	0.153	0.058	0.105	0.106	0.115	0.07	0.095	0.093	0.099	0.07		12.25	0.063	0.074	0.088	0.12	0.07	0.084	0.075	0.104	0.079	0.082	0.083	0.113	0.08	0.084	0.083	0.119	0.07	0.074	0.059
12.5	0.106	0.106	0.107	0.11	0.105	0.106	0.108	0.121	0.1	0.093	0.094	0.107	0.108	0.095	0.098	0.101	0.15	0.155	0.151	0.058	0.107	0.105	0.112	0.072	0.096	0.091	0.097	0.069		12.5	0.062	0.074	0.088	0.121	0.071	0.087	0.076	0.107	0.08	0.082	0.083	0.114	0.08	0.084	0.086	0.12	0.07	0.076	0.061
12.75	0.106	0.106	0.106	0.112	0.102	0.102	0.102	0.124	0.102	0.093	0.094	0.106	0.108	0.096	0.097	0.101	0.152	0.155	0.152	0.058	0.106	0.104	0.111	0.073	0.096	0.092	0.096	0.071		12.75	0.061	0.073	0.087	0.123	0.071	0.086	0.075	0.109	0.079	0.083	0.084	0.116	0.081	0.083	0.085	0.121	0.069	0.078	0.062
13	0.106	0.105	0.105	0.112	0.101	0.099	0.097	0.124	0.101	0.093	0.094	0.106	0.108	0.096	0.098	0.102	0.152	0.156	0.15	0.059	0.106	0.105	0.112	0.073	0.095	0.093	0.095	0.073		13	0.061	0.076	0.09	0.123	0.07	0.087	0.077	0.109	0.08	0.081	0.086	0.118	0.079	0.086	0.087	0.122	0.069	0.076	0.064
13.25	0.106	0.106	0.106	0.116	0.102	0.099	0.097	0.125	0.101	0.093	0.095	0.106	0.109	0.095	0.097	0.101	0.152	0.156	0.15	0.061	0.107	0.103	0.111	0.074	0.097	0.092	0.096	0.073		13.25	0.062	0.078	0.091	0.122	0.072	0.087	0.081	0.109	0.08	0.084	0.088	0.116	0.08	0.086	0.09	0.123	0.071	0.079	0.064
13.5	0.107	0.106	0.108	0.117	0.104	0.099	0.1	0.127	0.103	0.095	0.096	0.107	0.11	0.096	0.099	0.101	0.153	0.156	0.152	0.061	0.107	0.104	0.112	0.072	0.098	0.091	0.097	0.072		13.5	0.063	0.077	0.092	0.122	0.072	0.088	0.078	0.107	0.081	0.085	0.088	0.114	0.082	0.089	0.088	0.121	0.072	0.08	0.064
13.75	0.107	0.107	0.109	0.115	0.101	0.099	0.102	0.127	0.101	0.094	0.096	0.107	0.109	0.096	0.1	0.103	0.152	0.157	0.153	0.061	0.107	0.105	0.113	0.073	0.097	0.093	0.097	0.073		13.75	0.061	0.075	0.089	0.124	0.072	0.088	0.078	0.108	0.082	0.085	0.086	0.115	0.081	0.086	0.088	0.12	0.071	0.077	0.064
14	0.107	0.107	0.108	0.116	0.102	0.101	0.098	0.127	0.101	0.095	0.096	0.107	0.109	0.097	0.1	0.103	0.153	0.157	0.151	0.063	0.107	0.105	0.112	0.076	0.097	0.093	0.097	0.073		14	0.063	0.077	0.092	0.124	0.074	0.091	0.079	0.11	0.081	0.085	0.086	0.116	0.083	0.088	0.089	0.125	0.075	0.08	0.065
14.25	0.107	0.108	0.109	0.117	0.103	0.098	0.099	0.128	0.101	0.095	0.096	0.108	0.111	0.097	0.101	0.102	0.153	0.156	0.153	0.061	0.107	0.104	0.113	0.074	0.098	0.092	0.097	0.073		14.25	0.063	0.077	0.091	0.125	0.074	0.09	0.081	0.112	0.082	0.088	0.087	0.117	0.081	0.089	0.09	0.122	0.074	0.082	0.065
14.5	0.108	0.107	0.109	0.117	0.104	0.099	0.101	0.129	0.103	0.095	0.097	0.11	0.111	0.097	0.101	0.103	0.155	0.157	0.152	0.063	0.108	0.105	0.116	0.076	0.098	0.093	0.099	0.074		14.5	0.063	0.079	0.093	0.125	0.074	0.093	0.081	0.112	0.084	0.087	0.087	0.119	0.082	0.089	0.09	0.124	0.075	0.084	0.066
14.75	0.107	0.109	0.109	0.117	0.103	0.106	0.101	0.129	0.103	0.096	0.098	0.11	0.112	0.099	0.101	0.105	0.153	0.159	0.155	0.061	0.107	0.107	0.115	0.075	0.099	0.095	0.1	0.075		14.75	0.065	0.078	0.093	0.124	0.074	0.092	0.082	0.113	0.084	0.088	0.089	0.12	0.084	0.09	0.092	0.125	0.077	0.083	0.068
15	0.107	0.114	0.111	0.117	0.101	0.112	0.102	0.13	0.103	0.098	0.099	0.111	0.111	0.1	0.102	0.106	0.155	0.161	0.154	0.064	0.109	0.109	0.115	0.075	0.098	0.097	0.099	0.073		15	0.066	0.079	0.095	0.126	0.076	0.093	0.081	0.112	0.084	0.088	0.09	0.118	0.084	0.089	0.091	0.126	0.078	0.085	0.069
15.25	0.108	0.113	0.11	0.116	0.104	0.111	0.101	0.128	0.103	0.099	0.097	0.11	0.112	0.101	0.103	0.106	0.157	0.161	0.154	0.063	0.109	0.109	0.115	0.077	0.1	0.096	0.1	0.075		15.25	0.065	0.081	0.093	0.128	0.077	0.094	0.082	0.114	0.083	0.089	0.09	0.12	0.086	0.091	0.091	0.126	0.079	0.084	0.067
15.5	0.11	0.114	0.11	0.117	0.107	0.115	0.099	0.131	0.104	0.099	0.099	0.111	0.112	0.102	0.103	0.107	0.157	0.163	0.154	0.064	0.111	0.111	0.116	0.078	0.102	0.099	0.1	0.075		15.5	0.066	0.08	0.097	0.126	0.079	0.094	0.085	0.115	0.085	0.089	0.091	0.12	0.083	0.091	0.094	0.128	0.081	0.086	0.07
15.75	0.11	0.117	0.108	0.119	0.104	0.124	0.096	0.131	0.105	0.099	0.099	0.111	0.113	0.103	0.103	0.109	0.157	0.163	0.155	0.066	0.111	0.112	0.116	0.079	0.101	0.101	0.099	0.077		15.75	0.065	0.084	0.096	0.13	0.078	0.097	0.084	0.116	0.084	0.091	0.092	0.121	0.083	0.093	0.093	0.131	0.08	0.087	0.07
16	0.11	0.123	0.112	0.119	0.105	0.136	0.104	0.131	0.105	0.103	0.101	0.112	0.113	0.105	0.104	0.113	0.159	0.164	0.158	0.065	0.113	0.115	0.119	0.079	0.101	0.104	0.1	0.078		16	0.068	0.084	0.097	0.131	0.079	0.099	0.085	0.117	0.085	0.092	0.092	0.122	0.087	0.094	0.095	0.13	0.081	0.089	0.068
16.25	0.108	0.122	0.115	0.119	0.102	0.131	0.109	0.13	0.106	0.102	0.101	0.114	0.113	0.105	0.107	0.111	0.157	0.165	0.158	0.066	0.109	0.117	0.119	0.079	0.102	0.103	0.102	0.078		16.25	0.067	0.086	0.099	0.13	0.078	0.1	0.087	0.118	0.086	0.094	0.092	0.122	0.086	0.095	0.094	0.131	0.082	0.093	0.071
16.5	0.109	0.116	0.116	0.12	0.105	0.117	0.113	0.131	0.106	0.1	0.103	0.115	0.114	0.102	0.108	0.11	0.159	0.162	0.159	0.068	0.112	0.112	0.12	0.081	0.102	0.1	0.104	0.08		16.5	0.067	0.087	0.101	0.135	0.082	0.1	0.087	0.119	0.087	0.093	0.091	0.122	0.086	0.095	0.096	0.13	0.082	0.089	0.071
16.75	0.114	0.117	0.118	0.119	0.118	0.115	0.122	0.132	0.109	0.102	0.103	0.117	0.116	0.103	0.109	0.111	0.161	0.165	0.161	0.07	0.115	0.112	0.122	0.082	0.104	0.1	0.105	0.08		16.75	0.07	0.088	0.104	0.133	0.083	0.101	0.091	0.12	0.087	0.093	0.098	0.127	0.088	0.096	0.1	0.134	0.084	0.09	0.075
17	0.117	0.115	0.12	0.119	0.126	0.111	0.125	0.131	0.109	0.1	0.105	0.118	0.118	0.103	0.109	0.111	0.161	0.164	0.162	0.07	0.118	0.112	0.124	0.084	0.107	0.1	0.106	0.082		17	0.072	0.089	0.106	0.134	0.085	0.102	0.091	0.121	0.089	0.095	0.098	0.129	0.091	0.097	0.101	0.134	0.087	0.092	0.077
17.25	0.119	0.118	0.121	0.121	0.136	0.117	0.128	0.134	0.112	0.103	0.106	0.119	0.121	0.105	0.11	0.113	0.164	0.165	0.163	0.071	0.12	0.112	0.125	0.082	0.11	0.101	0.108	0.082		17.25	0.071	0.09	0.105	0.136	0.086	0.104	0.091	0.122	0.091	0.095	0.098	0.129	0.092	0.099	0.101	0.134	0.089	0.097	0.077
17.5	0.115	0.118	0.118	0.121	0.119	0.117	0.115	0.135	0.109	0.102	0.105	0.118	0.117	0.106	0.109	0.113	0.163	0.164	0.162	0.072	0.116	0.113	0.122	0.084	0.108	0.101	0.106	0.082		17.5	0.075	0.09	0.108	0.139	0.089	0.105	0.094	0.127	0.091	0.098	0.101	0.134	0.092	0.099	0.104	0.138	0.091	0.098	0.078
17.75	0.115	0.118	0.115	0.123	0.118	0.117	0.112	0.134	0.11	0.103	0.105	0.117	0.118	0.104	0.109	0.111	0.164	0.166	0.161	0.071	0.116	0.114	0.122	0.084	0.108	0.099	0.105	0.084		17.75	0.074	0.091	0.107	0.139	0.088	0.104	0.093	0.127	0.091	0.097	0.101	0.134	0.092	0.098	0.105	0.138	0.09	0.098	0.078
18	0.115	0.118	0.118	0.122	0.116	0.114	0.111	0.136	0.109	0.102	0.105	0.117	0.118	0.105	0.11	0.113	0.163	0.167	0.161	0.073	0.117	0.114	0.122	0.084	0.106	0.1	0.105	0.081		18	0.073	0.088	0.108	0.141	0.088	0.106	0.095	0.126	0.091	0.099	0.103	0.135	0.091	0.1	0.107	0.139	0.091	0.097	0.08
18.25	0.116	0.119	0.119	0.124	0.115	0.117	0.113	0.138	0.11	0.104	0.106	0.118	0.119	0.107	0.111	0.115	0.163	0.165	0.162	0.07	0.118	0.114	0.122	0.082	0.107	0.101	0.106	0.084		18.25	0.074	0.089	0.11	0.139	0.088	0.106	0.094	0.127	0.092	0.098	0.104	0.132	0.093	0.1	0.107	0.139	0.092	0.098	0.081
18.5	0.117	0.119	0.119	0.124	0.118	0.118	0.114	0.138	0.111	0.105	0.106	0.118	0.12	0.109	0.113	0.113	0.165	0.167	0.162	0.073	0.117	0.117	0.124	0.087	0.108	0.102	0.107	0.084		18.5	0.074	0.094	0.111	0.138	0.09	0.105	0.096	0.125	0.092	0.099	0.104	0.135	0.093	0.101	0.109	0.14	0.094	0.1	0.082
18.75	0.116	0.119	0.119	0.125	0.117	0.115	0.113	0.139	0.112	0.105	0.107	0.12	0.12	0.108	0.112	0.113	0.164	0.167	0.164	0.073	0.118	0.116	0.124	0.089	0.109	0.102	0.108	0.085		18.75	0.076	0.091	0.114	0.144	0.089	0.107	0.096	0.128	0.093	0.1	0.103	0.136	0.092	0.101	0.109	0.143	0.095	0.1	0.083
19	0.116	0.121	0.12	0.125	0.116	0.118	0.115	0.14	0.112	0.105	0.107	0.121	0.12	0.107	0.113	0.115	0.166	0.167	0.164	0.075	0.116	0.113	0.126	0.088	0.108	0.103	0.107	0.086		19	0.075	0.091	0.113	0.144	0.092	0.108	0.096	0.129	0.094	0.101	0.105	0.137	0.093	0.103	0.11	0.145	0.097	0.102	0.083
19.25	0.116	0.127	0.119	0.127	0.114	0.136	0.11	0.141	0.111	0.108	0.107	0.119	0.12	0.111	0.113	0.118	0.166	0.171	0.162	0.076	0.118	0.122	0.123	0.091	0.11	0.109	0.107	0.09		19.25	0.074	0.091	0.113	0.147	0.091	0.108	0.096	0.129	0.092	0.102	0.104	0.137	0.092	0.104	0.107	0.143	0.095	0.1	0.083
19.5	0.117	0.127	0.12	0.127	0.114	0.142	0.109	0.143	0.111	0.109	0.108	0.12	0.12	0.113	0.113	0.12	0.166	0.172	0.165	0.075	0.117	0.123	0.126	0.09	0.109	0.108	0.108	0.088		19.5	0.075	0.093	0.114	0.148	0.092	0.111	0.097	0.13	0.094	0.102	0.105	0.139	0.094	0.104	0.11	0.143	0.097	0.103	0.082
19.75	0.117	0.13	0.12	0.127	0.118	0.143	0.113	0.145	0.112	0.109	0.108	0.12	0.122	0.113	0.113	0.12	0.167	0.174	0.167	0.075	0.121	0.122	0.126	0.084	0.112	0.109	0.107	0.088		19.75	0.075	0.097	0.114	0.146	0.093	0.111	0.099	0.132	0.093	0.105	0.106	0.138	0.096	0.106	0.111	0.145	0.097	0.105	0.084
20	0.12	0.13	0.121	0.126	0.118	0.142	0.108	0.142	0.113	0.11	0.108	0.122	0.122	0.113	0.115	0.121	0.168	0.174	0.166	0.08	0.12	0.123	0.125	0.086	0.111	0.11	0.108	0.09		20	0.078	0.098	0.116	0.149	0.093	0.116	0.1	0.133	0.095	0.105	0.107	0.141	0.099	0.107	0.112	0.149	0.098	0.108	0.088
20.25	0.12	0.129	0.123	0.129	0.118	0.132	0.116	0.143	0.113	0.108	0.109	0.123	0.123	0.112	0.116	0.119	0.171	0.175	0.166	0.079	0.119	0.121	0.127	0.086	0.11	0.107	0.109	0.091		20.25	0.078	0.097	0.118	0.15	0.094	0.114	0.1	0.132	0.095	0.106	0.107	0.139	0.097	0.109	0.114	0.147	0.099	0.106	0.086
20.5	0.119	0.125	0.125	0.128	0.117	0.126	0.121	0.144	0.113	0.109	0.111	0.124	0.123	0.112	0.117	0.119	0.17	0.171	0.168	0.079	0.12	0.12	0.131	0.087	0.113	0.11	0.111	0.092		20.5	0.079	0.103	0.117	0.149	0.096	0.118	0.101	0.132	0.094	0.107	0.108	0.138	0.099	0.11	0.113	0.148	0.103	0.11	0.089
20.75	0.121	0.128	0.126	0.13	0.12	0.132	0.124	0.144	0.114	0.109	0.11	0.125	0.124	0.114	0.119	0.119	0.169	0.173	0.17	0.079	0.122	0.12	0.131	0.088	0.112	0.108	0.114	0.092		20.75	0.079	0.104	0.119	0.149	0.098	0.119	0.105	0.134	0.096	0.106	0.11	0.142	0.099	0.114	0.116	0.151	0.101	0.115	0.087
21	0.119	0.13	0.127	0.13	0.118	0.13	0.126	0.147	0.115	0.109	0.113	0.126	0.124	0.115	0.12	0.121	0.17	0.173	0.17	0.082	0.122	0.119	0.132	0.088	0.113	0.11	0.113	0.092		21	0.081	0.106	0.121	0.151	0.098	0.12	0.106	0.14	0.097	0.109	0.11	0.146	0.101	0.113	0.119	0.153	0.105	0.112	0.088
21.25	0.122	0.128	0.13	0.13	0.124	0.13	0.133	0.147	0.115	0.11	0.114	0.129	0.124	0.114	0.121	0.122	0.171	0.174	0.173	0.082	0.124	0.123	0.134	0.091	0.116	0.109	0.115	0.092		21.25	0.083	0.106	0.122	0.155	0.1	0.122	0.106	0.138	0.098	0.109	0.113	0.145	0.101	0.117	0.122	0.153	0.107	0.114	0.095
21.5	0.129	0.13	0.129	0.13	0.141	0.131	0.132	0.148	0.118	0.111	0.114	0.128	0.128	0.115	0.121	0.123	0.176	0.177	0.171	0.081	0.129	0.123	0.135	0.088	0.119	0.111	0.118	0.093		21.5	0.081	0.105	0.123	0.157	0.1	0.123	0.108	0.141	0.097	0.11	0.11	0.151	0.1	0.116	0.12	0.157	0.104	0.115	0.091
21.75	0.128	0.13	0.131	0.133	0.144	0.129	0.135	0.149	0.12	0.112	0.116	0.13	0.13	0.116	0.123	0.124	0.176	0.176	0.172	0.083	0.129	0.192	0.136	0.091	0.121	0.109	0.117	0.096		21.75	0.087	0.107	0.124	0.156	0.106	0.123	0.108	0.142	0.1	0.111	0.114	0.15	0.104	0.115	0.122	0.156	0.11	0.116	0.092
22	0.131	0.129	0.133	0.133	0.154	0.128	0.139	0.149	0.12	0.112	0.117	0.13	0.13	0.116	0.123	0.123	0.178	0.176	0.176	0.081	0.131	0.19	0.137	0.09	0.121	0.109	0.119	0.094		22	0.086	0.108	0.124	0.158	0.104	0.124	0.108	0.142	0.101	0.111	0.117	0.15	0.105	0.116	0.122	0.157	0.113	0.116	0.094
22.25	0.127	0.131	0.135	0.134	0.136	0.128	0.143	0.15	0.119	0.112	0.117	0.132	0.129	0.115	0.124	0.124	0.176	0.176	0.175	0.085	0.129	0.193	0.139	0.092	0.119	0.11	0.119	0.095		22.25	0.088	0.108	0.128	0.159	0.107	0.126	0.111	0.145	0.102	0.112	0.117	0.152	0.106	0.117	0.125	0.159	0.115	0.121	0.096
22.5	0.125	0.132	0.134	0.135	0.131	0.128	0.14	0.153	0.119	0.113	0.118	0.132	0.128	0.117	0.125	0.125	0.178	0.179	0.176	0.084	0.127	0.193	0.138	0.092	0.119	0.112	0.12	0.096		22.5	0.087	0.11	0.13	0.159	0.104	0.125	0.113	0.144	0.104	0.113	0.116	0.155	0.107	0.12	0.126	0.161	0.114	0.121	0.097
22.75	0.126	0.135	0.138	0.134	0.13	0.136	0.146	0.152	0.119	0.115	0.119	0.134	0.13	0.119	0.127	0.128	0.177	0.179	0.178	0.086	0.127	0.194	0.142	0.092	0.119	0.114	0.123	0.099		22.75	0.085	0.112	0.13	0.16	0.11	0.128	0.112	0.146	0.103	0.115	0.119	0.154	0.108	0.119	0.127	0.161	0.117	0.121	0.101
23	0.126	0.137	0.135	0.135	0.13	0.147	0.141	0.153	0.121	0.115	0.119	0.133	0.13	0.121	0.127	0.128	0.178	0.18	0.177	0.087	0.128	0.196	0.139	0.094	0.119	0.115	0.122	0.099		23	0.089	0.113	0.133	0.162	0.109	0.132	0.115	0.149	0.104	0.115	0.121	0.158	0.109	0.121	0.129	0.164	0.118	0.12	0.104
23.25	0.126	0.139	0.133	0.135	0.129	0.154	0.129	0.154	0.12	0.118	0.117	0.132	0.131	0.122	0.124	0.131	0.178	0.183	0.176	0.088	0.127	0.202	0.137	0.097	0.122	0.117	0.12	0.101		23.25	0.088	0.114	0.136	0.162	0.11	0.132	0.118	0.149	0.105	0.116	0.122	0.158	0.107	0.121	0.132	0.166	0.119	0.124	0.105
23.5	0.127	0.143	0.132	0.136	0.127	0.162	0.127	0.157	0.12	0.119	0.119	0.132	0.132	0.124	0.127	0.133	0.178	0.186	0.177	0.085	0.128	0.204	0.137	0.097	0.12	0.121	0.119	0.102		23.5	0.089	0.113	0.134	0.163	0.112	0.135	0.119	0.15	0.105	0.117	0.123	0.16	0.109	0.124	0.132	0.165	0.118	0.127	0.102
23.75	0.125	0.144	0.133	0.139	0.127	0.162	0.125	0.158	0.121	0.12	0.119	0.133	0.132	0.124	0.127	0.134	0.178	0.186	0.176	0.089	0.128	0.205	0.139	0.1	0.119	0.122	0.119	0.101		23.75	0.088	0.114	0.136	0.165	0.112	0.134	0.118	0.15	0.105	0.117	0.122	0.158	0.108	0.125	0.133	0.166	0.119	0.125	0.102
24	0.128	0.142	0.133	0.137	0.13	0.155	0.123	0.158	0.121	0.12	0.119	0.132	0.131	0.124	0.126	0.132	0.179	0.185	0.175	0.09	0.13	0.203	0.136	0.1	0.122	0.12	0.116	0.103		24	0.091	0.115	0.137	0.166	0.115	0.135	0.121	0.152	0.106	0.119	0.124	0.159	0.111	0.127	0.133	0.166	0.125	0.129	0.107
24.25	0.132	0.139	0.131	0.14	0.145	0.144	0.122	0.16	0.123	0.118	0.12	0.133	0.136	0.122	0.128	0.131	0.182	0.183	0.176	0.092	0.133	0.199	0.138	0.098	0.126	0.119	0.12	0.104		24.25	0.09	0.121	0.136	0.165	0.117	0.14	0.121	0.154	0.106	0.121	0.125	0.16	0.112	0.129	0.135	0.167	0.121	0.131	0.106
24.5	0.136	0.139	0.136	0.138	0.153	0.143	0.132	0.16	0.125	0.119	0.123	0.137	0.138	0.122	0.129	0.131	0.184	0.184	0.18	0.091	0.137	0.199	0.14	0.099	0.127	0.118	0.124	0.104		24.5	0.095	0.121	0.137	0.165	0.119	0.139	0.118	0.152	0.108	0.121	0.124	0.16	0.114	0.129	0.134	0.168	0.126	0.134	0.105
24.75	0.14	0.138	0.138	0.138	0.16	0.145	0.137	0.161	0.127	0.12	0.122	0.135	0.137	0.124	0.13	0.132	0.188	0.186	0.181	0.094	0.14	0.205	0.142	0.101	0.129	0.117	0.122	0.106		24.75	0.097	0.126	0.138	0.167	0.121	0.144	0.121	0.154	0.109	0.125	0.124	0.158	0.117	0.131	0.138	0.17	0.127	0.138	0.105
25	0.143	0.141	0.14	0.14	0.168	0.146	0.144	0.164	0.128	0.118	0.124	0.138	0.14	0.126	0.133	0.132	0.188	0.186	0.182	0.094	0.142	0.203	0.144	0.102	0.133	0.118	0.125	0.107		25	0.1	0.126	0.14	0.169	0.122	0.143	0.124	0.155	0.11	0.124	0.126	0.163	0.112	0.13	0.137	0.172	0.128	0.138	0.11
25.25	0.138	0.142	0.144	0.14	0.151	0.148	0.15	0.164	0.126	0.12	0.125	0.138	0.138	0.127	0.133	0.133	0.188	0.187	0.182	0.094	0.136	0.203	0.145	0.105	0.128	0.12	0.125	0.106		25.25	0.101	0.125	0.143	0.171	0.124	0.144	0.127	0.157	0.113	0.124	0.13	0.165	0.114	0.13	0.14	0.172	0.135	0.137	0.113
25.5	0.136	0.143	0.141	0.141	0.145	0.149	0.147	0.163	0.127	0.121	0.125	0.139	0.137	0.126	0.134	0.135	0.186	0.186	0.185	0.095	0.135	0.203	0.145	0.101	0.129	0.121	0.125	0.106		25.5	0.102	0.125	0.144	0.171	0.125	0.143	0.127	0.159	0.113	0.125	0.129	0.166	0.118	0.134	0.14	0.174	0.134	0.142	0.114
25.75	0.135	0.142	0.144	0.144	0.145	0.144	0.152	0.166	0.126	0.121	0.127	0.142	0.139	0.127	0.136	0.135	0.188	0.188	0.186	0.097	0.137	0.206	0.149	0.105	0.129	0.121	0.128	0.108		25.75	0.103	0.125	0.143	0.173	0.125	0.147	0.128	0.162	0.111	0.126	0.132	0.168	0.115	0.134	0.142	0.177	0.136	0.143	0.112
26	0.136	0.144	0.146	0.143	0.148	0.146	0.155	0.166	0.128	0.12	0.129	0.142	0.14	0.128	0.137	0.136	0.188	0.188	0.187	0.096	0.137	0.205	0.15	0.109	0.13	0.121	0.129	0.111		26	0.103	0.126	0.145	0.174	0.126	0.146	0.128	0.162	0.113	0.126	0.129	0.17	0.117	0.138	0.142	0.177	0.136	0.141	0.115
26.25	0.137	0.142	0.148	0.144	0.144	0.146	0.156	0.168	0.128	0.122	0.128	0.143	0.14	0.128	0.137	0.137	0.192	0.189	0.188	0.099	0.138	0.204	0.151	0.106	0.13	0.123	0.128	0.111		26.25	0.103	0.127	0.149	0.175	0.127	0.147	0.132	0.165	0.112	0.127	0.133	0.171	0.116	0.138	0.145	0.18	0.14	0.146	0.114
26.5	0.137	0.144	0.147	0.145	0.143	0.149	0.158	0.169	0.129	0.124	0.129	0.144	0.14	0.128	0.139	0.137	0.188	0.192	0.188	0.1	0.138	0.205	0.151	0.109	0.13	0.123	0.13	0.113		26.5	0.099	0.13	0.147	0.176	0.127	0.151	0.132	0.167	0.112	0.129	0.134	0.171	0.117	0.139	0.146	0.181	0.138	0.144	0.121
26.75	0.138	0.145	0.148	0.147	0.146	0.149	0.157	0.17	0.129	0.122	0.13	0.145	0.141	0.13	0.14	0.137	0.19	0.192	0.19	0.101	0.138	0.206	0.152	0.111	0.132	0.124	0.131	0.113		26.75	0.102	0.131	0.15	0.179	0.126	0.149	0.133	0.168	0.114	0.129	0.134	0.175	0.117	0.138	0.148	0.183	0.135	0.147	0.121
27	0.14	0.148	0.15	0.144	0.148	0.162	0.16	0.171	0.131	0.126	0.13	0.145	0.143	0.133	0.142	0.142	0.191	0.194	0.192	0.102	0.142	0.21	0.152	0.109	0.133	0.128	0.133	0.115		27	0.101	0.132	0.151	0.179	0.13	0.15	0.134	0.166	0.115	0.13	0.136	0.175	0.118	0.142	0.149	0.185	0.141	0.146	0.121
27.25	0.14	0.153	0.152	0.147	0.148	0.17	0.16	0.173	0.13	0.128	0.131	0.147	0.142	0.134	0.142	0.143	0.193	0.197	0.19	0.103	0.142	0.215	0.155	0.112	0.134	0.129	0.136	0.116		27.25	0.106	0.133	0.152	0.181	0.133	0.154	0.133	0.167	0.115	0.134	0.137	0.176	0.121	0.143	0.151	0.186	0.142	0.151	0.123
27.5	0.141	0.154	0.152	0.148	0.147	0.174	0.157	0.173	0.13	0.129	0.132	0.146	0.143	0.134	0.141	0.144	0.193	0.197	0.19	0.103	0.141	0.216	0.152	0.111	0.134	0.131	0.135	0.116		27.5	0.104	0.133	0.153	0.178	0.132	0.154	0.137	0.17	0.117	0.134	0.137	0.177	0.118	0.143	0.151	0.185	0.143	0.154	0.124
27.75	0.14	0.153	0.151	0.148	0.147	0.165	0.156	0.173	0.131	0.129	0.131	0.148	0.144	0.134	0.142	0.143	0.195	0.195	0.193	0.103	0.144	0.213	0.153	0.113	0.132	0.13	0.133	0.116		27.75	0.107	0.135	0.155	0.184	0.135	0.157	0.136	0.171	0.118	0.133	0.139	0.18	0.121	0.145	0.152	0.187	0.147	0.154	0.127
28	0.142	0.151	0.15	0.149	0.15	0.16	0.15	0.177	0.133	0.129	0.132	0.146	0.145	0.135	0.142	0.143	0.195	0.197	0.192	0.108	0.145	0.212	0.153	0.114	0.135	0.129	0.133	0.118		28	0.107	0.135	0.158	0.181	0.134	0.157	0.139	0.17	0.119	0.135	0.138	0.181	0.123	0.145	0.153	0.189	0.144	0.159	0.133
28.25	0.143	0.154	0.15	0.151	0.148	0.16	0.145	0.177	0.132	0.128	0.132	0.146	0.147	0.135	0.141	0.143	0.196	0.198	0.191	0.107	0.143	0.213	0.153	0.116	0.136	0.131	0.131	0.121		28.25	0.11	0.139	0.158	0.182	0.138	0.159	0.139	0.174	0.12	0.139	0.141	0.18	0.123	0.147	0.156	0.19	0.149	0.157	0.134
28.5	0.146	0.153	0.15	0.152	0.156	0.161	0.144	0.178	0.136	0.128	0.131	0.146	0.146	0.137	0.142	0.143	0.197	0.201	0.191	0.106	0.147	0.215	0.154	0.118	0.14	0.131	0.132	0.118		28.5	0.112	0.14	0.158	0.182	0.139	0.16	0.139	0.171	0.12	0.14	0.14	0.179	0.127	0.15	0.155	0.189	0.149	0.163	0.131
28.75	0.151	0.154	0.15	0.152	0.172	0.161	0.144	0.18	0.137	0.131	0.132	0.147	0.149	0.138	0.145	0.146	0.202	0.201	0.192	0.106	0.151	0.216	0.153	0.117	0.144	0.131	0.136	0.12		28.75	0.112	0.139	0.157	0.186	0.14	0.162	0.14	0.174	0.123	0.139	0.142	0.18	0.129	0.149	0.156	0.192	0.151	0.164	0.131
29	0.156	0.156	0.151	0.154	0.187	0.163	0.144	0.179	0.139	0.131	0.132	0.148	0.155	0.138	0.143	0.145	0.205	0.201	0.193	0.109	0.156	0.218	0.153	0.12	0.147	0.132	0.135	0.12		29	0.114	0.142	0.159	0.187	0.141	0.163	0.14	0.174	0.124	0.14	0.145	0.18	0.129	0.152	0.16	0.191	0.159	0.164	0.133
29.25	0.154	0.154	0.15	0.152	0.18	0.163	0.144	0.181	0.14	0.131	0.132	0.148	0.152	0.139	0.144	0.146	0.207	0.201	0.194	0.11	0.156	0.218	0.155	0.122	0.148	0.134	0.134	0.125		29.25	0.114	0.141	0.159	0.185	0.145	0.166	0.142	0.177	0.126	0.14	0.144	0.179	0.128	0.153	0.157	0.192	0.157	0.165	0.133
29.5	0.151	0.157	0.151	0.156	0.165	0.164	0.147	0.184	0.138	0.131	0.136	0.15	0.152	0.14	0.144	0.146	0.202	0.203	0.196	0.111	0.152	0.219	0.158	0.122	0.143	0.136	0.136	0.123		29.5	0.116	0.142	0.16	0.184	0.143	0.166	0.145	0.177	0.126	0.142	0.143	0.181	0.131	0.154	0.163	0.192	0.161	0.167	0.136
29.75	0.152	0.156	0.157	0.156	0.164	0.163	0.161	0.185	0.139	0.133	0.135	0.154	0.153	0.141	0.149	0.146	0.204	0.202	0.201	0.112	0.151	0.219	0.159	0.121	0.145	0.134	0.138	0.122		29.75	0.118	0.141	0.16	0.186	0.146	0.165	0.144	0.175	0.127	0.143	0.146	0.181	0.134	0.154	0.161	0.195	0.161	0.17	0.138
30	0.151	0.158	0.158	0.158	0.162	0.164	0.163	0.184	0.138	0.134	0.138	0.153	0.154	0.141	0.148	0.148	0.203	0.207	0.201	0.114	0.153	0.22	0.162	0.123	0.142	0.137	0.14	0.128		30	0.116	0.142	0.161	0.186	0.147	0.165	0.147	0.177	0.126	0.142	0.144	0.183	0.132	0.155	0.162	0.199	0.163	0.17	0.136
30.25	0.15	0.16	0.161	0.159	0.162	0.166	0.169	0.188	0.139	0.135	0.139	0.155	0.153	0.14	0.152	0.148	0.204	0.207	0.203	0.116	0.152	0.221	0.164	0.125	0.145	0.137	0.145	0.128		30.25	0.117	0.144	0.162	0.188	0.15	0.171	0.147	0.177	0.13	0.144	0.148	0.186	0.135	0.156	0.163	0.198	0.166	0.171	0.141
30.5	0.151	0.159	0.161	0.161	0.163	0.17	0.168	0.189	0.141	0.134	0.14	0.156	0.154	0.143	0.153	0.15	0.208	0.205	0.201	0.115	0.153	0.223	0.166	0.129	0.145	0.138	0.143	0.131		30.5	0.117	0.143	0.166	0.194	0.146	0.168	0.148	0.179	0.13	0.142	0.147	0.186	0.135	0.157	0.164	0.2	0.171	0.172	0.143
30.75	0.151	0.159	0.165	0.162	0.166	0.166	0.18	0.191	0.141	0.135	0.141	0.157	0.156	0.143	0.154	0.15	0.208	0.206	0.205	0.119	0.154	0.224	0.169	0.126	0.146	0.136	0.148	0.131		30.75	0.117	0.146	0.165	0.192	0.15	0.169	0.149	0.181	0.129	0.146	0.149	0.189	0.135	0.159	0.166	0.202	0.168	0.176	0.146
31	0.151	0.16	0.164	0.164	0.16	0.168	0.173	0.193	0.142	0.136	0.141	0.158	0.155	0.143	0.155	0.151	0.209	0.208	0.204	0.116	0.156	0.222	0.168	0.127	0.145	0.14	0.145	0.131		31	0.116	0.149	0.168	0.191	0.15	0.171	0.15	0.18	0.131	0.147	0.151	0.19	0.136	0.159	0.167	0.203	0.165	0.178	0.145
31.25	0.154	0.163	0.164	0.164	0.164	0.17	0.177	0.194	0.142	0.137	0.144	0.159	0.156	0.145	0.155	0.152	0.21	0.21	0.209	0.118	0.155	0.226	0.168	0.128	0.149	0.14	0.148	0.131		31.25	0.119	0.147	0.169	0.192	0.152	0.175	0.152	0.185	0.132	0.145	0.151	0.192	0.137	0.161	0.168	0.205	0.169	0.178	0.148
31.5	0.154	0.162	0.161	0.164	0.164	0.172	0.166	0.197	0.143	0.137	0.142	0.158	0.155	0.146	0.155	0.152	0.209	0.212	0.208	0.119	0.155	0.226	0.169	0.13	0.149	0.142	0.147	0.13		31.5	0.12	0.152	0.169	0.195	0.156	0.178	0.151	0.186	0.132	0.149	0.153	0.194	0.138	0.161	0.173	0.206	0.171	0.183	0.15
31.75	0.155	0.162	0.162	0.166	0.168	0.169	0.163	0.199	0.144	0.138	0.141	0.157	0.157	0.146	0.154	0.152	0.215	0.213	0.207	0.118	0.157	0.227	0.168	0.129	0.152	0.141	0.146	0.134		31.75	0.121	0.15	0.172	0.194	0.154	0.178	0.152	0.187	0.133	0.15	0.154	0.195	0.138	0.161	0.17	0.206	0.173	0.182	0.153
32	0.155	0.164	0.164	0.167	0.167	0.167	0.162	0.198	0.145	0.138	0.144	0.159	0.158	0.147	0.156	0.152	0.213	0.213	0.208	0.121	0.16	0.227	0.168	0.132	0.152	0.143	0.148	0.133		32	0.121	0.152	0.171	0.194	0.158	0.177	0.156	0.188	0.134	0.148	0.156	0.193	0.143	0.163	0.173	0.207	0.173	0.184	0.153
32.25	0.156	0.163	0.163	0.167	0.169	0.169	0.164	0.2	0.145	0.138	0.144	0.161	0.16	0.147	0.156	0.155	0.213	0.21	0.208	0.125	0.161	0.228	0.169	0.134	0.151	0.142	0.15	0.135		32.25	0.124	0.151	0.171	0.192	0.157	0.178	0.154	0.187	0.135	0.148	0.154	0.192	0.141	0.164	0.174	0.204	0.176	0.182	0.156
32.5	0.158	0.166	0.164	0.171	0.169	0.176	0.164	0.201	0.147	0.139	0.145	0.16	0.161	0.149	0.158	0.156	0.216	0.216	0.21	0.127	0.159	0.231	0.169	0.134	0.153	0.145	0.148	0.14		32.5	0.124	0.151	0.173	0.195	0.157	0.177	0.155	0.187	0.134	0.149	0.154	0.194	0.144	0.164	0.175	0.206	0.18	0.186	0.154
32.75	0.158	0.167	0.164	0.169	0.172	0.178	0.164	0.201	0.147	0.142	0.145	0.162	0.162	0.149	0.157	0.156	0.218	0.217	0.212	0.127	0.163	0.231	0.173	0.136	0.155	0.148	0.15	0.138		32.75	0.123	0.153	0.173	0.195	0.161	0.181	0.156	0.189	0.137	0.15	0.155	0.196	0.144	0.168	0.174	0.206	0.182	0.189	0.155
33	0.158	0.17	0.167	0.171	0.167	0.183	0.167	0.204	0.148	0.141	0.146	0.164	0.162	0.151	0.158	0.157	0.219	0.217	0.212	0.126	0.165	0.233	0.172	0.137	0.153	0.146	0.151	0.142		33	0.126	0.155	0.172	0.2	0.161	0.184	0.156	0.188	0.138	0.153	0.155	0.192	0.144	0.17	0.176	0.207	0.183	0.193	0.159
33.25	0.162	0.172	0.168	0.172	0.178	0.185	0.169	0.207	0.149	0.143	0.146	0.162	0.164	0.152	0.16	0.159	0.22	0.22	0.213	0.129	0.162	0.234	0.172	0.139	0.158	0.151	0.152	0.142		33.25	0.126	0.154	0.173	0.2	0.161	0.183	0.159	0.189	0.14	0.154	0.156	0.195	0.147	0.17	0.177	0.209	0.185	0.192	0.159
33.5	0.166	0.171	0.168	0.173	0.193	0.186	0.167	0.209	0.152	0.144	0.147	0.163	0.168	0.154	0.161	0.16	0.225	0.222	0.214	0.135	0.17	0.237	0.171	0.144	0.16	0.15	0.152	0.145		33.5	0.128	0.154	0.172	0.197	0.166	0.185	0.156	0.192	0.14	0.154	0.155	0.196	0.147	0.169	0.175	0.21	0.188	0.197	0.161
33.75	0.17	0.173	0.169	0.175	0.201	0.188	0.166	0.209	0.155	0.145	0.148	0.165	0.169	0.154	0.162	0.161	0.225	0.221	0.218	0.132	0.172	0.237	0.173	0.142	0.164	0.151	0.151	0.146		33.75	0.128	0.158	0.174	0.199	0.17	0.187	0.16	0.193	0.142	0.156	0.156	0.197	0.15	0.171	0.178	0.211	0.19	0.202	0.164
34	0.171	0.174	0.167	0.175	0.202	0.19	0.164	0.212	0.154	0.146	0.148	0.166	0.169	0.155	0.162	0.163	0.226	0.222	0.215	0.132	0.172	0.24	0.176	0.142	0.167	0.153	0.152	0.146		34	0.13	0.158	0.177	0.201	0.168	0.191	0.16	0.191	0.144	0.158	0.158	0.198	0.149	0.174	0.178	0.213	0.194	0.2	0.165
34.25	0.166	0.173	0.171	0.178	0.192	0.186	0.169	0.215	0.153	0.146	0.149	0.167	0.169	0.156	0.163	0.161	0.225	0.221	0.219	0.134	0.171	0.239	0.178	0.146	0.163	0.152	0.155	0.145		34.25	0.133	0.157	0.176	0.202	0.167	0.19	0.163	0.194	0.145	0.16	0.157	0.198	0.153	0.174	0.18	0.214	0.197	0.201	0.168
34.5	0.166	0.174	0.174	0.18	0.186	0.185	0.179	0.216	0.154	0.146	0.152	0.168	0.169	0.157	0.166	0.162	0.225	0.226	0.219	0.135	0.171	0.238	0.18	0.145	0.163	0.154	0.157	0.15		34.5	0.134	0.16	0.179	0.201	0.173	0.191	0.16	0.196	0.143	0.16	0.159	0.196	0.154	0.176	0.182	0.216	0.202	0.205	0.168
34.75	0.168	0.173	0.179	0.18	0.188	0.182	0.191	0.215	0.156	0.147	0.154	0.173	0.17	0.157	0.168	0.162	0.229	0.224	0.222	0.136	0.172	0.239	0.182	0.149	0.164	0.153	0.162	0.147		34.75	0.132	0.163	0.178	0.203	0.173	0.192	0.162	0.196	0.145	0.164	0.159	0.198	0.154	0.175	0.181	0.217	0.203	0.207	0.169
35	0.167	0.176	0.179	0.183	0.187	0.185	0.186	0.22	0.157	0.146	0.152	0.17	0.172	0.157	0.168	0.164	0.227	0.227	0.223	0.138	0.173	0.242	0.183	0.149	0.167	0.155	0.161	0.15		35	0.134	0.162	0.183	0.204	0.176	0.195	0.164	0.197	0.146	0.164	0.162	0.201	0.155	0.177	0.186	0.22	0.202	0.207	0.172
35.25	0.169	0.174	0.179	0.183	0.187	0.185	0.191	0.221	0.156	0.15	0.155	0.174	0.17	0.159	0.17	0.165	0.231	0.228	0.226	0.138	0.173	0.243	0.187	0.152	0.166	0.158	0.164	0.152		35.25	0.128	0.161	0.181	0.204	0.176	0.196	0.165	0.2	0.145	0.163	0.164	0.205	0.156	0.178	0.184	0.221	0.2	0.211	0.174
35.5	0.169	0.177	0.18	0.184	0.186	0.188	0.193	0.222	0.157	0.151	0.156	0.174	0.172	0.159	0.171	0.165	0.231	0.228	0.226	0.142	0.175	0.245	0.184	0.149	0.165	0.156	0.164	0.152		35.5	0.129	0.163	0.183	0.208	0.177	0.195	0.168	0.201	0.147	0.161	0.165	0.206	0.156	0.177	0.189	0.221	0.203	0.214	0.178
35.75	0.169	0.178	0.182	0.184	0.19	0.188	0.199	0.225	0.158	0.149	0.158	0.175	0.172	0.161	0.172	0.167	0.229	0.229	0.229	0.144	0.175	0.244	0.188	0.154	0.169	0.157	0.167	0.155		35.75	0.132	0.163	0.182	0.206	0.175	0.2	0.166	0.204	0.148	0.162	0.163	0.209	0.158	0.179	0.188	0.223	0.206	0.216	0.18
36	0.172	0.179	0.186	0.184	0.192	0.193	0.208	0.226	0.159	0.152	0.16	0.178	0.174	0.16	0.175	0.168	0.234	0.23	0.23	0.144	0.179	0.245	0.192	0.154	0.171	0.162	0.169	0.158		36	0.133	0.165	0.187	0.207	0.177	0.198	0.17	0.202	0.148	0.16	0.165	0.211	0.157	0.182	0.19	0.224	0.204	0.215	0.178
36.25	0.171	0.18	0.183	0.189	0.193	0.191	0.194	0.231	0.161	0.153	0.159	0.176	0.175	0.162	0.174	0.168	0.234	0.233	0.229	0.144	0.177	0.246	0.191	0.155	0.168	0.161	0.165	0.156		36.25	0.138	0.165	0.184	0.209	0.181	0.202	0.173	0.209	0.149	0.164	0.166	0.212	0.16	0.184	0.192	0.225	0.212	0.217	0.182
36.5	0.172	0.18	0.181	0.188	0.192	0.19	0.186	0.231	0.16	0.151	0.159	0.177	0.175	0.162	0.173	0.167	0.237	0.232	0.228	0.146	0.178	0.249	0.19	0.158	0.17	0.159	0.168	0.157		36.5	0.137	0.164	0.185	0.208	0.182	0.2	0.173	0.208	0.15	0.166	0.168	0.213	0.16	0.181	0.192	0.23	0.213	0.223	0.183
36.75	0.171	0.182	0.183	0.189	0.192	0.194	0.188	0.233	0.161	0.153	0.159	0.177	0.176	0.164	0.173	0.17	0.236	0.235	0.23	0.151	0.179	0.25	0.189	0.159	0.172	0.161	0.166	0.161		36.75	0.138	0.166	0.191	0.21	0.184	0.206	0.175	0.209	0.152	0.165	0.171	0.213	0.162	0.184	0.196	0.225	0.216	0.224	0.188
37	0.174	0.184	0.184	0.191	0.196	0.2	0.191	0.234	0.162	0.153	0.162	0.177	0.175	0.167	0.177	0.172	0.237	0.235	0.234	0.151	0.18	0.252	0.191	0.162	0.172	0.167	0.168	0.161		37	0.141	0.167	0.187	0.208	0.185	0.204	0.173	0.207	0.153	0.168	0.17	0.21	0.161	0.184	0.197	0.227	0.214	0.224	0.191
37.25	0.176	0.185	0.185	0.188	0.2	0.203	0.192	0.234	0.165	0.157	0.161	0.179	0.18	0.167	0.178	0.172	0.239	0.239	0.234	0.15	0.182	0.255	0.195	0.16	0.175	0.165	0.171	0.163		37.25	0.14	0.165	0.189	0.212	0.188	0.206	0.175	0.212	0.152	0.167	0.172	0.21	0.163	0.184	0.197	0.23	0.217	0.227	0.192
37.5	0.174	0.186	0.184	0.19	0.193	0.205	0.191	0.236	0.163	0.156	0.162	0.181	0.178	0.169	0.178	0.173	0.241	0.238	0.235	0.152	0.184	0.253	0.191	0.164	0.173	0.169	0.169	0.162		37.5	0.14	0.168	0.19	0.21	0.191	0.21	0.175	0.21	0.154	0.17	0.17	0.212	0.162	0.189	0.197	0.228	0.219	0.225	0.192
37.75	0.181	0.189	0.185	0.193	0.214	0.208	0.193	0.239	0.168	0.158	0.162	0.182	0.182	0.168	0.181	0.175	0.246	0.238	0.237	0.152	0.19	0.257	0.192	0.164	0.179	0.168	0.173	0.164		37.75	0.139	0.169	0.187	0.213	0.191	0.207	0.18	0.211	0.157	0.169	0.171	0.21	0.164	0.188	0.198	0.231	0.221	0.229	0.193
38	0.184	0.191	0.187	0.196	0.22	0.212	0.189	0.242	0.168	0.159	0.163	0.182	0.185	0.171	0.179	0.175	0.245	0.243	0.238	0.154	0.191	0.258	0.196	0.164	0.18	0.17	0.172	0.167		38	0.144	0.168	0.19	0.213	0.194	0.207	0.176	0.21	0.16	0.171	0.169	0.212	0.172	0.189	0.198	0.23	0.226	0.231	0.194
38.25	0.185	0.19	0.189	0.194	0.225	0.212	0.193	0.243	0.169	0.159	0.164	0.182	0.185	0.171	0.181	0.176	0.248	0.242	0.238	0.157	0.193	0.26	0.197	0.17	0.184	0.171	0.174	0.169		38.25	0.145	0.174	0.19	0.214	0.195	0.211	0.176	0.211	0.161	0.172	0.173	0.214	0.171	0.191	0.199	0.229	0.227	0.236	0.195
38.5	0.192	0.191	0.188	0.198	0.236	0.212	0.195	0.246	0.173	0.159	0.164	0.185	0.189	0.171	0.18	0.178	0.251	0.243	0.237	0.159	0.195	0.26	0.197	0.171	0.188	0.17	0.175	0.169		38.5	0.146	0.173	0.192	0.216	0.199	0.21	0.179	0.213	0.162	0.172	0.174	0.216	0.168	0.193	0.202	0.231	0.232	0.237	0.199
38.75	0.186	0.192	0.192	0.197	0.219	0.211	0.196	0.247	0.172	0.16	0.165	0.184	0.187	0.173	0.184	0.178	0.251	0.242	0.241	0.164	0.192	0.261	0.197	0.171	0.183	0.17	0.176	0.172		38.75	0.147	0.173	0.194	0.215	0.2	0.213	0.181	0.215	0.163	0.174	0.176	0.213	0.171	0.192	0.203	0.232	0.231	0.234	0.2
39	0.184	0.193	0.191	0.202	0.214	0.21	0.195	0.251	0.17	0.162	0.168	0.184	0.187	0.173	0.184	0.179	0.25	0.244	0.24	0.162	0.191	0.26	0.2	0.172	0.182	0.172	0.177	0.173		39	0.145	0.175	0.195	0.215	0.201	0.213	0.184	0.218	0.162	0.175	0.175	0.217	0.172	0.192	0.204	0.235	0.236	0.245	0.203
39.25	0.184	0.193	0.19	0.199	0.214	0.21	0.193	0.25	0.172	0.163	0.169	0.185	0.187	0.174	0.185	0.18	0.253	0.244	0.242	0.165	0.192	0.263	0.199	0.173	0.184	0.172	0.177	0.175		39.25	0.148	0.176	0.196	0.214	0.202	0.216	0.183	0.215	0.162	0.175	0.177	0.216	0.172	0.195	0.207	0.239	0.237	0.245	0.208
39.5	0.186	0.195	0.193	0.2	0.215	0.211	0.196	0.252	0.172	0.163	0.169	0.186	0.189	0.176	0.186	0.181	0.251	0.247	0.241	0.167	0.195	0.262	0.203	0.176	0.186	0.172	0.179	0.176		39.5	0.149	0.177	0.193	0.219	0.205	0.218	0.187	0.216	0.166	0.178	0.177	0.214	0.175	0.194	0.205	0.24	0.24	0.247	0.208
39.75	0.186	0.195	0.198	0.204	0.213	0.214	0.212	0.256	0.172	0.17	0.172	0.19	0.189	0.176	0.19	0.181	0.253	0.246	0.246	0.167	0.195	0.186	0.206	0.176	0.186	0.178	0.182	0.177		39.75	0.145	0.178	0.194	0.217	0.205	0.219	0.183	0.22	0.163	0.178	0.179	0.218	0.174	0.196	0.207	0.24	0.239	0.249	0.21
40	0.19	0.195	0.201	0.205	0.217	0.214	0.215	0.258	0.173	0.171	0.173	0.193	0.189	0.175	0.191	0.183	0.256	0.248	0.25	0.169	0.196	0.19	0.21	0.177	0.188	0.178	0.186	0.177		40	0.147	0.18	0.196	0.22	0.207	0.221	0.183	0.223	0.165	0.18	0.178	0.219	0.176	0.198	0.207	0.24	0.245	0.248	0.206
40.25	0.189	0.194	0.198	0.205	0.218	0.213	0.217	0.257	0.177	0.171	0.172	0.192	0.192	0.177	0.191	0.184	0.256	0.248	0.25	0.17	0.198	0.189	0.21	0.182	0.189	0.179	0.187	0.179		40.25	0.145	0.178	0.194	0.219	0.208	0.221	0.185	0.224	0.163	0.179	0.181	0.222	0.174	0.198	0.211	0.242	0.243	0.249	0.21
40.5	0.19	0.198	0.203	0.204	0.221	0.218	0.219	0.261	0.176	0.173	0.175	0.195	0.193	0.18	0.193	0.185	0.258	0.251	0.253	0.173	0.201	0.191	0.212	0.182	0.192	0.182	0.187	0.181		40.5	0.145	0.179	0.198	0.222	0.208	0.222	0.189	0.228	0.165	0.179	0.18	0.225	0.175	0.199	0.213	0.247	0.245	0.25	0.211
40.75	0.192	0.201	0.207	0.208	0.22	0.226	0.233	0.262	0.178	0.175	0.178	0.196	0.192	0.182	0.196	0.187	0.26	0.254	0.256	0.17	0.198	0.193	0.216	0.182	0.192	0.184	0.192	0.182		40.75	0.147	0.18	0.201	0.224	0.212	0.223	0.192	0.227	0.166	0.181	0.183	0.226	0.18	0.197	0.214	0.245	0.249	0.254	0.218
41	0.191	0.201	0.205	0.208	0.218	0.229	0.224	0.265	0.177	0.175	0.177	0.198	0.194	0.182	0.195	0.188	0.258	0.255	0.255	0.169	0.201	0.197	0.213	0.186	0.19	0.185	0.189	0.183		41	0.146	0.179	0.2	0.224	0.214	0.222	0.191	0.226	0.168	0.184	0.186	0.228	0.178	0.198	0.214	0.246	0.249	0.255	0.224
41.25	0.193	0.203	0.207	0.21	0.223	0.229	0.228	0.267	0.179	0.176	0.178	0.197	0.194	0.183	0.197	0.19	0.261	0.257	0.256	0.176	0.202	0.196	0.217	0.185	0.194	0.187	0.192	0.186		41.25	0.147	0.184	0.2	0.225	0.214	0.226	0.193	0.228	0.168	0.182	0.185	0.227	0.181	0.201	0.216	0.249	0.255	0.256	0.219
41.5	0.194	0.206	0.207	0.21	0.221	0.234	0.221	0.268	0.179	0.176	0.177	0.199	0.196	0.184	0.196	0.191	0.263	0.26	0.257	0.178	0.205	0.199	0.215	0.187	0.195	0.19	0.193	0.184		41.5	0.15	0.181	0.203	0.226	0.216	0.23	0.193	0.231	0.17	0.185	0.189	0.234	0.18	0.203	0.217	0.251	0.254	0.261	0.22
41.75	0.199	0.207	0.206	0.21	0.238	0.235	0.218	0.268	0.182	0.179	0.179	0.199	0.199	0.186	0.196	0.192	0.266	0.26	0.259	0.18	0.209	0.202	0.215	0.189	0.199	0.19	0.189	0.187		41.75	0.148	0.185	0.201	0.23	0.217	0.23	0.195	0.232	0.17	0.185	0.189	0.234	0.184	0.206	0.218	0.251	0.257	0.264	0.225
42	0.201	0.209	0.207	0.212	0.246	0.238	0.218	0.27	0.183	0.179	0.179	0.201	0.201	0.187	0.197	0.191	0.269	0.263	0.258	0.185	0.211	0.202	0.215	0.193	0.202	0.191	0.192	0.189		42	0.152	0.184	0.203	0.233	0.219	0.233	0.195	0.233	0.173	0.186	0.188	0.235	0.185	0.21	0.221	0.251	0.26	0.268	0.229
42.25	0.205	0.21	0.206	0.213	0.258	0.237	0.219	0.271	0.186	0.179	0.181	0.2	0.205	0.188	0.198	0.195	0.272	0.263	0.262	0.187	0.216	0.202	0.218	0.195	0.205	0.193	0.193	0.193		42.25	0.154	0.186	0.201	0.232	0.221	0.235	0.196	0.229	0.175	0.186	0.189	0.235	0.19	0.209	0.221	0.251	0.264	0.267	0.232
42.5	0.205	0.212	0.207	0.215	0.258	0.243	0.22	0.275	0.186	0.181	0.181	0.202	0.205	0.191	0.199	0.196	0.274	0.263	0.261	0.188	0.217	0.206	0.219	0.194	0.207	0.194	0.195	0.193		42.5	0.154	0.187	0.206	0.233	0.223	0.232	0.197	0.236	0.176	0.188	0.19	0.23	0.189	0.209	0.224	0.253	0.265	0.269	0.233
42.75	0.203	0.213	0.207	0.215	0.244	0.242	0.219	0.274	0.186	0.182	0.183	0.202	0.203	0.189	0.2	0.196	0.273	0.266	0.263	0.189	0.214	0.204	0.219	0.195	0.203	0.195	0.196	0.195		42.75	0.156	0.186	0.204	0.231	0.225	0.237	0.198	0.233	0.176	0.187	0.189	0.23	0.191	0.21	0.222	0.252	0.267	0.275	0.233
43	0.201	0.211	0.209	0.216	0.238	0.24	0.221	0.278	0.187	0.183	0.184	0.204	0.201	0.192	0.204	0.195	0.272	0.266	0.264	0.19	0.213	0.206	0.221	0.199	0.203	0.194	0.197	0.197		43	0.157	0.184	0.205	0.232	0.229	0.237	0.199	0.233	0.179	0.19	0.188	0.231	0.19	0.211	0.222	0.256	0.269	0.277	0.232
43.25	0.2	0.211	0.211	0.22	0.237	0.239	0.224	0.277	0.186	0.183	0.185	0.205	0.203	0.19	0.203	0.197	0.274	0.268	0.265	0.191	0.215	0.207	0.225	0.201	0.204	0.195	0.197	0.196		43.25	0.154	0.187	0.202	0.233	0.229	0.238	0.201	0.237	0.179	0.189	0.19	0.233	0.193	0.214	0.224	0.255	0.274	0.278	0.238
43.5	0.204	0.213	0.211	0.22	0.243	0.242	0.22	0.28	0.187	0.184	0.185	0.205	0.207	0.192	0.206	0.197	0.275	0.27	0.268	0.193	0.215	0.207	0.223	0.2	0.206	0.198	0.198	0.197		43.5	0.156	0.189	0.204	0.235	0.23	0.239	0.199	0.236	0.178	0.19	0.188	0.233	0.193	0.213	0.225	0.257	0.278	0.281	0.237
43.75	0.206	0.211	0.213	0.221	0.243	0.24	0.225	0.284	0.191	0.183	0.186	0.207	0.206	0.193	0.206	0.198	0.276	0.271	0.268	0.195	0.216	0.206	0.227	0.202	0.209	0.198	0.199	0.202		43.75	0.154	0.189	0.205	0.232	0.231	0.242	0.2	0.238	0.178	0.194	0.192	0.232	0.194	0.215	0.229	0.257	0.277	0.283	0.238
44	0.205	0.214	0.213	0.22	0.244	0.237	0.225	0.284	0.191	0.187	0.186	0.209	0.206	0.194	0.207	0.197	0.278	0.272	0.268	0.195	0.218	0.207	0.228	0.202	0.209	0.197	0.202	0.203		44	0.155	0.19	0.205	0.235	0.234	0.24	0.206	0.239	0.178	0.192	0.192	0.235	0.193	0.215	0.228	0.258	0.276	0.285	0.242
44.25	0.206	0.216	0.213	0.223	0.243	0.242	0.223	0.286	0.193	0.186	0.186	0.209	0.21	0.196	0.207	0.201	0.277	0.272	0.269	0.196	0.22	0.208	0.226	0.206	0.21	0.199	0.204	0.203		44.25	0.153	0.188	0.206	0.239	0.235	0.243	0.209	0.239	0.179	0.192	0.193	0.235	0.194	0.215	0.228	0.258	0.281	0.285	0.246
44.5	0.206	0.218	0.215	0.224	0.244	0.249	0.228	0.287	0.193	0.188	0.19	0.21	0.209	0.197	0.208	0.202	0.281	0.279	0.274	0.199	0.219	0.212	0.227	0.206	0.212	0.201	0.205	0.204		44.5	0.156	0.188	0.206	0.236	0.237	0.245	0.207	0.239	0.18	0.193	0.194	0.238	0.194	0.217	0.232	0.261	0.285	0.285	0.244
44.75	0.211	0.223	0.219	0.224	0.249	0.263	0.241	0.29	0.193	0.193	0.191	0.212	0.212	0.202	0.212	0.205	0.283	0.278	0.276	0.199	0.224	0.216	0.233	0.211	0.213	0.207	0.209	0.206		44.75	0.155	0.188	0.21	0.239	0.238	0.243	0.211	0.24	0.183	0.198	0.195	0.237	0.198	0.216	0.232	0.26	0.283	0.29	0.251
45	0.209	0.225	0.221	0.228	0.248	0.27	0.246	0.294	0.194	0.193	0.193	0.215	0.21	0.201	0.216	0.206	0.284	0.282	0.278	0.204	0.224	0.218	0.235	0.21	0.214	0.208	0.21	0.208		45	0.157	0.19	0.208	0.238	0.242	0.247	0.209	0.242	0.182	0.196	0.195	0.237	0.198	0.22	0.233	0.261	0.287	0.292	0.25
45.25	0.209	0.229	0.224	0.229	0.242	0.277	0.249	0.297	0.197	0.194	0.196	0.215	0.212	0.204	0.216	0.21	0.284	0.283	0.279	0.206	0.223	0.225	0.241	0.213	0.214	0.212	0.215	0.211		45.25	0.159	0.191	0.208	0.239	0.241	0.248	0.211	0.246	0.184	0.198	0.196	0.24	0.199	0.218	0.234	0.264	0.287	0.294	0.25
45.5	0.214	0.225	0.23	0.229	0.258	0.264	0.261	0.299	0.198	0.195	0.198	0.221	0.215	0.203	0.22	0.208	0.29	0.282	0.282	0.21	0.228	0.218	0.241	0.215	0.219	0.209	0.215	0.213		45.5	0.16	0.192	0.211	0.239	0.246	0.25	0.211	0.247	0.183	0.201	0.198	0.245	0.199	0.222	0.234	0.265	0.289	0.298	0.254
45.75	0.223	0.226	0.228	0.23	0.276	0.256	0.256	0.299	0.201	0.192	0.196	0.22	0.22	0.203	0.219	0.207	0.291	0.284	0.284	0.207	0.234	0.22	0.242	0.218	0.223	0.208	0.217	0.216		45.75	0.161	0.192	0.211	0.242	0.246	0.253	0.215	0.25	0.187	0.198	0.2	0.249	0.204	0.221	0.238	0.266	0.292	0.302	0.257
46	0.222	0.227	0.229	0.23	0.277	0.26	0.259	0.303	0.203	0.195	0.201	0.221	0.22	0.204	0.22	0.209	0.293	0.285	0.285	0.211	0.236	0.222	0.242	0.219	0.223	0.21	0.217	0.219		46	0.163	0.195	0.211	0.243	0.251	0.254	0.215	0.251	0.187	0.202	0.2	0.247	0.206	0.225	0.241	0.268	0.295	0.303	0.259
46.25	0.224	0.227	0.232	0.232	0.282	0.261	0.26	0.303	0.204	0.195	0.201	0.222	0.223	0.204	0.222	0.211	0.295	0.286	0.287	0.211	0.236	0.22	0.245	0.222	0.227	0.212	0.218	0.218		46.25	0.162	0.195	0.216	0.242	0.251	0.255	0.217	0.252	0.189	0.2	0.202	0.25	0.205	0.226	0.241	0.27	0.305	0.31	0.265
46.5	0.221	0.228	0.228	0.235	0.274	0.257	0.249	0.306	0.204	0.195	0.201	0.221	0.221	0.205	0.222	0.211	0.297	0.287	0.288	0.21	0.236	0.223	0.238	0.221	0.228	0.213	0.217	0.22		46.5	0.164	0.197	0.217	0.242	0.25	0.258	0.217	0.253	0.191	0.204	0.206	0.25	0.21	0.229	0.247	0.269	0.308	0.307	0.268
46.75	0.22	0.226	0.228	0.234	0.267	0.258	0.246	0.306	0.202	0.197	0.199	0.221	0.222	0.205	0.221	0.21	0.299	0.287	0.288	0.213	0.237	0.223	0.242	0.22	0.225	0.212	0.215	0.221		46.75	0.166	0.195	0.216	0.244	0.256	0.257	0.221	0.256	0.191	0.202	0.207	0.251	0.207	0.231	0.243	0.27	0.306	0.308	0.271
47	0.221	0.227	0.229	0.234	0.267	0.263	0.247	0.308	0.204	0.198	0.202	0.222	0.221	0.208	0.222	0.212	0.297	0.291	0.288	0.214	0.235	0.225	0.244	0.222	0.225	0.214	0.217	0.219		47	0.168	0.195	0.216	0.246	0.257	0.258	0.219	0.255	0.192	0.2	0.205	0.25	0.209	0.228	0.244	0.271	0.311	0.31	0.271
47.25	0.223	0.23	0.229	0.237	0.266	0.262	0.246	0.308	0.204	0.199	0.202	0.223	0.224	0.21	0.226	0.212	0.3	0.292	0.29	0.22	0.237	0.228	0.242	0.227	0.225	0.215	0.217	0.224		47.25	0.169	0.197	0.214	0.243	0.259	0.26	0.221	0.257	0.191	0.205	0.207	0.25	0.208	0.234	0.245	0.273	0.311	0.315	0.273
47.5	0.222	0.234	0.232	0.236	0.263	0.274	0.247	0.31	0.204	0.201	0.202	0.225	0.223	0.211	0.223	0.217	0.298	0.295	0.292	0.215	0.235	0.229	0.247	0.224	0.228	0.22	0.219	0.224		47.5	0.168	0.197	0.217	0.245	0.262	0.262	0.222	0.255	0.193	0.205	0.206	0.25	0.211	0.234	0.243	0.274	0.313	0.318	0.273
47.75	0.224	0.236	0.232	0.239	0.265	0.278	0.247	0.313	0.207	0.203	0.206	0.224	0.226	0.214	0.227	0.219	0.3	0.297	0.294	0.219	0.239	0.23	0.247	0.226	0.227	0.221	0.22	0.227		47.75	0.168	0.195	0.219	0.244	0.263	0.262	0.222	0.258	0.195	0.203	0.206	0.25	0.213	0.237	0.249	0.271	0.315	0.318	0.275
48	0.225	0.24	0.233	0.239	0.267	0.288	0.246	0.313	0.21	0.204	0.203	0.226	0.225	0.216	0.227	0.221	0.302	0.302	0.293	0.222	0.241	0.235	0.249	0.234	0.23	0.223	0.221	0.227		48	0.169	0.191	0.215	0.246	0.264	0.265	0.221	0.257	0.193	0.203	0.205	0.25	0.213	0.237	0.247	0.275	0.316	0.32	0.278
48.25	0.226	0.243	0.235	0.241	0.268	0.289	0.258	0.317	0.211	0.206	0.208	0.23	0.228	0.219	0.231	0.219	0.306	0.302	0.297	0.221	0.243	0.235	0.249	0.234	0.232	0.227	0.224	0.231		48.25	0.165	0.198	0.217	0.247	0.265	0.263	0.224	0.257	0.194	0.204	0.21	0.253	0.216	0.236	0.249	0.274	0.318	0.325	0.279
48.5	0.228	0.243	0.24	0.241	0.271	0.289	0.265	0.319	0.209	0.206	0.209	0.231	0.231	0.217	0.231	0.224	0.306	0.303	0.301	0.225	0.243	0.238	0.253	0.234	0.233	0.226	0.228	0.232		48.5	0.169	0.199	0.22	0.245	0.266	0.267	0.223	0.262	0.197	0.207	0.209	0.254	0.215	0.239	0.25	0.276	0.322	0.328	0.282
48.75	0.234	0.245	0.244	0.244	0.286	0.299	0.274	0.321	0.213	0.21	0.21	0.235	0.231	0.221	0.233	0.226	0.309	0.304	0.304	0.225	0.249	0.24	0.256	0.236	0.238	0.229	0.232	0.233		48.75	0.167	0.197	0.217	0.245	0.269	0.268	0.225	0.258	0.197	0.206	0.209	0.251	0.213	0.238	0.251	0.276	0.322	0.33	0.285
49	0.236	0.244	0.244	0.245	0.298	0.288	0.277	0.327	0.217	0.207	0.211	0.236	0.234	0.22	0.236	0.223	0.313	0.305	0.304	0.231	0.252	0.239	0.26	0.236	0.242	0.229	0.234	0.238		49	0.171	0.199	0.218	0.248	0.27	0.272	0.229	0.26	0.198	0.209	0.213	0.256	0.217	0.244	0.254	0.28	0.328	0.33	0.289
49.25	0.24	0.244	0.244	0.246	0.303	0.289	0.277	0.327	0.217	0.209	0.214	0.235	0.236	0.221	0.237	0.224	0.319	0.308	0.303	0.23	0.255	0.24	0.26	0.242	0.242	0.23	0.231	0.24		49.25	0.175	0.204	0.22	0.246	0.274	0.274	0.228	0.261	0.2	0.209	0.21	0.26	0.222	0.245	0.255	0.28	0.334	0.334	0.29
49.5	0.239	0.243	0.249	0.247	0.305	0.283	0.285	0.327	0.219	0.209	0.215	0.239	0.238	0.219	0.239	0.225	0.318	0.306	0.309	0.232	0.259	0.24	0.261	0.243	0.245	0.226	0.234	0.243		49.5	0.172	0.201	0.219	0.25	0.275	0.277	0.23	0.266	0.202	0.209	0.214	0.26	0.22	0.242	0.254	0.281	0.334	0.337	0.292
49.75	0.237	0.246	0.25	0.247	0.293	0.283	0.289	0.332	0.217	0.209	0.217	0.241	0.238	0.222	0.241	0.226	0.317	0.308	0.312	0.235	0.256	0.242	0.26	0.244	0.245	0.23	0.235	0.241		49.75	0.171	0.204	0.22	0.25	0.276	0.277	0.231	0.266	0.205	0.208	0.213	0.263	0.222	0.242	0.256	0.283	0.336	0.339	0.296
50	0.238	0.247	0.251	0.252	0.289	0.287	0.292	0.335	0.217	0.211	0.217	0.241	0.237	0.222	0.243	0.226	0.317	0.309	0.312	0.234	0.256	0.245	0.263	0.242	0.241	0.232	0.239	0.244		50	0.174	0.205	0.221	0.251	0.277	0.278	0.231	0.27	0.202	0.212	0.213	0.265	0.225	0.245	0.26	0.283	0.339	0.341	0.3
50.25	0.236	0.247	0.253	0.253	0.286	0.288	0.296	0.336	0.219	0.211	0.217	0.242	0.24	0.224	0.245	0.227	0.316	0.31	0.314	0.233	0.257	0.243	0.265	0.246	0.244	0.233	0.239	0.241		50.25	0.173	0.207	0.222	0.249	0.281	0.28	0.23	0.269	0.204	0.215	0.218	0.264	0.222	0.245	0.26	0.288	0.338	0.345	0.298
50.5	0.237	0.247	0.252	0.253	0.287	0.287	0.285	0.338	0.22	0.213	0.218	0.242	0.239	0.223	0.245	0.226	0.321	0.311	0.313	0.236	0.256	0.242	0.265	0.248	0.244	0.232	0.236	0.248		50.5	0.172	0.205	0.224	0.25	0.28	0.284	0.236	0.269	0.207	0.212	0.219	0.267	0.226	0.249	0.26	0.287	0.342	0.345	0.3
50.75	0.24	0.25	0.25	0.256	0.288	0.291	0.281	0.341	0.222	0.215	0.219	0.243	0.24	0.227	0.245	0.231	0.321	0.312	0.312	0.237	0.258	0.247	0.266	0.249	0.246	0.237	0.238	0.245		50.75	0.173	0.206	0.228	0.255	0.284	0.285	0.236	0.269	0.207	0.216	0.221	0.27	0.228	0.248	0.261	0.289	0.345	0.347	0.306
51	0.241	0.254	0.252	0.255	0.289	0.296	0.278	0.343	0.222	0.215	0.221	0.243	0.242	0.229	0.245	0.232	0.318	0.314	0.315	0.243	0.26	0.249	0.265	0.25	0.247	0.238	0.237	0.248		51	0.172	0.206	0.228	0.253	0.287	0.285	0.238	0.271	0.206	0.212	0.219	0.27	0.227	0.247	0.263	0.288	0.348	0.352	0.306
51.25	0.241	0.256	0.249	0.257	0.291	0.311	0.277	0.344	0.223	0.218	0.222	0.242	0.243	0.232	0.246	0.234	0.324	0.32	0.316	0.24	0.261	0.254	0.267	0.25	0.25	0.241	0.236	0.25		51.25	0.171	0.206	0.228	0.253	0.289	0.289	0.239	0.273	0.209	0.216	0.22	0.267	0.229	0.248	0.266	0.291	0.349	0.352	0.31
51.5	0.242	0.259	0.253	0.259	0.292	0.309	0.275	0.349	0.223	0.22	0.221	0.244	0.245	0.232	0.247	0.239	0.326	0.319	0.317	0.242	0.263	0.253	0.268	0.252	0.251	0.243	0.242	0.251		51.5	0.172	0.208	0.225	0.252	0.289	0.287	0.237	0.272	0.207	0.217	0.219	0.268	0.231	0.249	0.264	0.29	0.355	0.356	0.309
51.75	0.244	0.259	0.254	0.262	0.29	0.313	0.277	0.35	0.226	0.221	0.223	0.247	0.245	0.235	0.249	0.237	0.326	0.322	0.32	0.246	0.264	0.258	0.269	0.255	0.25	0.241	0.241	0.255		51.75	0.172	0.207	0.225	0.255	0.293	0.289	0.237	0.275	0.209	0.216	0.221	0.269	0.232	0.251	0.267	0.289	0.356	0.354	0.314
52	0.25	0.263	0.255	0.263	0.307	0.316	0.278	0.352	0.229	0.222	0.223	0.247	0.248	0.234	0.249	0.24	0.331	0.324	0.32	0.249	0.266	0.259	0.269	0.255	0.256	0.245	0.243	0.256		52	0.173	0.206	0.225	0.256	0.291	0.292	0.24	0.277	0.208	0.218	0.221	0.267	0.231	0.25	0.263	0.292	0.352	0.359	0.312
52.25	0.255	0.265	0.256	0.266	0.327	0.323	0.279	0.355	0.231	0.223	0.224	0.249	0.253	0.237	0.249	0.241	0.335	0.326	0.321	0.247	0.274	0.262	0.268	0.255	0.261	0.247	0.239	0.258		52.25	0.176	0.208	0.229	0.252	0.295	0.292	0.241	0.275	0.212	0.218	0.222	0.269	0.237	0.256	0.268	0.291	0.361	0.361	0.317
52.5	0.256	0.263	0.258	0.267	0.327	0.318	0.282	0.359	0.232	0.223	0.228	0.251	0.255	0.236	0.252	0.242	0.339	0.324	0.323	0.25	0.275	0.26	0.273	0.257	0.263	0.247	0.244	0.256		52.5	0.177	0.211	0.225	0.254	0.295	0.295	0.243	0.279	0.21	0.22	0.223	0.269	0.237	0.254	0.27	0.294	0.363	0.365	0.319
52.75	0.258	0.26	0.263	0.268	0.331	0.313	0.297	0.361	0.235	0.224	0.228	0.252	0.257	0.239	0.256	0.241	0.336	0.328	0.328	0.252	0.279	0.261	0.275	0.259	0.264	0.247	0.246	0.264		52.75	0.176	0.209	0.226	0.254	0.299	0.297	0.242	0.278	0.213	0.22	0.223	0.27	0.237	0.254	0.267	0.292	0.368	0.369	0.319
53	0.253	0.265	0.264	0.269	0.316	0.314	0.3	0.365	0.235	0.226	0.231	0.256	0.255	0.237	0.259	0.242	0.34	0.326	0.331	0.245	0.275	0.26	0.279	0.262	0.262	0.249	0.25	0.263		53	0.18	0.21	0.226	0.254	0.303	0.299	0.242	0.278	0.213	0.221	0.225	0.271	0.239	0.256	0.271	0.294	0.37	0.369	0.322
53.25	0.255	0.264	0.271	0.27	0.313	0.316	0.31	0.365	0.234	0.226	0.233	0.258	0.255	0.242	0.26	0.244	0.338	0.327	0.332	0.246	0.276	0.263	0.28	0.262	0.262	0.249	0.256	0.262		53.25	0.177	0.213	0.226	0.253	0.301	0.3	0.245	0.281	0.215	0.224	0.225	0.275	0.239	0.258	0.271	0.298	0.37	0.375	0.326
53.5	0.257	0.267	0.271	0.274	0.317	0.318	0.311	0.37	0.237	0.228	0.235	0.26	0.258	0.242	0.261	0.246	0.34	0.331	0.335	0.244	0.277	0.264	0.281	0.262	0.265	0.252	0.254	0.26		53.5	0.177	0.211	0.226	0.254	0.305	0.299	0.245	0.281	0.215	0.222	0.226	0.279	0.241	0.26	0.275	0.299	0.373	0.374	0.327
53.75	0.259	0.267	0.272	0.274	0.319	0.319	0.316	0.372	0.238	0.229	0.238	0.262	0.258	0.244	0.265	0.245	0.339	0.331	0.337	0.243	0.28	0.266	0.285	0.263	0.268	0.25	0.257	0.262		53.75	0.176	0.213	0.229	0.255	0.305	0.303	0.249	0.286	0.216	0.224	0.229	0.276	0.241	0.261	0.276	0.3	0.371	0.375	0.332
54	0.26	0.269	0.273	0.275	0.32	0.319	0.316	0.373	0.238	0.228	0.237	0.262	0.258	0.244	0.264	0.247	0.341	0.334	0.336	0.251	0.28	0.264	0.286	0.267	0.267	0.252	0.255	0.265		54	0.181	0.213	0.231	0.256	0.306	0.303	0.251	0.287	0.221	0.226	0.229	0.278	0.243	0.261	0.279	0.304	0.375	0.38	0.336
54.25	0.259	0.271	0.274	0.277	0.32	0.32	0.318	0.376	0.239	0.229	0.239	0.263	0.261	0.247	0.267	0.247	0.343	0.337	0.34	0.251	0.283	0.267	0.291	0.264	0.27	0.252	0.254	0.265		54.25	0.181	0.214	0.23	0.259	0.31	0.305	0.249	0.289	0.22	0.226	0.232	0.283	0.243	0.263	0.279	0.307	0.377	0.381	0.336
54.5	0.261	0.271	0.271	0.278	0.323	0.325	0.306	0.381	0.242	0.231	0.238	0.264	0.26	0.247	0.264	0.251	0.344	0.335	0.337	0.247	0.282	0.269	0.285	0.26	0.272	0.257	0.257	0.269		54.5	0.175	0.21	0.233	0.259	0.313	0.308	0.252	0.289	0.219	0.225	0.23	0.28	0.244	0.266	0.281	0.306	0.38	0.381	0.342
54.75	0.264	0.273	0.275	0.28	0.324	0.327	0.305	0.383	0.242	0.233	0.238	0.264	0.262	0.249	0.266	0.251	0.348	0.339	0.341	0.255	0.287	0.27	0.286	0.263	0.273	0.257	0.257	0.269		54.75	0.179	0.211	0.23	0.257	0.312	0.307	0.251	0.291	0.223	0.226	0.232	0.284	0.246	0.263	0.283	0.305	0.383	0.384	0.344
55	0.263	0.274	0.274	0.281	0.323	0.33	0.307	0.386	0.242	0.236	0.24	0.265	0.264	0.25	0.268	0.254	0.35	0.341	0.342	0.257	0.287	0.272	0.284	0.268	0.27	0.259	0.258	0.272		55	0.179	0.212	0.232	0.26	0.315	0.308	0.253	0.289	0.221	0.229	0.233	0.282	0.248	0.263	0.283	0.308	0.386	0.387	0.343
55.25	0.265	0.278	0.278	0.284	0.327	0.336	0.308	0.389	0.246	0.236	0.242	0.266	0.265	0.252	0.273	0.256	0.349	0.342	0.342	0.264	0.29	0.275	0.288	0.264	0.274	0.261	0.259	0.276		55.25	0.179	0.212	0.232	0.259	0.316	0.311	0.254	0.29	0.223	0.233	0.233	0.282	0.25	0.264	0.284	0.307	0.389	0.39	0.348
55.5	0.266	0.279	0.275	0.286	0.326	0.339	0.308	0.393	0.245	0.239	0.242	0.267	0.268	0.253	0.272	0.255	0.353	0.345	0.344	0.262	0.29	0.276	0.285	0.268	0.274	0.26	0.26	0.278		55.5	0.18	0.215	0.231	0.257	0.322	0.311	0.255	0.29	0.223	0.236	0.232	0.284	0.25	0.267	0.285	0.309	0.386	0.39	0.348
55.75	0.271	0.281	0.276	0.288	0.336	0.343	0.308	0.394	0.247	0.238	0.243	0.268	0.268	0.255	0.271	0.258	0.358	0.347	0.346	0.257	0.294	0.277	0.292	0.268	0.278	0.262	0.263	0.279		55.75	0.18	0.213	0.231	0.258	0.32	0.315	0.257	0.292	0.224	0.236	0.232	0.284	0.253	0.266	0.284	0.309	0.39	0.395	0.35
56	0.274	0.284	0.278	0.292	0.349	0.345	0.308	0.4	0.25	0.24	0.244	0.268	0.274	0.258	0.273	0.26	0.359	0.35	0.347	0.257	0.298	0.281	0.29	0.265	0.28	0.262	0.261	0.278		56	0.181	0.215	0.231	0.258	0.327	0.315	0.257	0.29	0.228	0.236	0.235	0.282	0.255	0.267	0.286	0.309	0.397	0.395	0.35
56.25	0.277	0.286	0.282	0.291	0.355	0.35	0.319	0.401	0.253	0.242	0.247	0.272	0.275	0.258	0.274	0.26	0.358	0.351	0.352	0.259	0.302	0.281	0.295	0.268	0.285	0.269	0.263	0.28		56.25	0.184	0.216	0.231	0.258	0.331	0.317	0.26	0.291	0.229	0.239	0.237	0.282	0.258	0.27	0.289	0.309	0.399	0.399	0.354
56.5	0.282	0.289	0.288	0.293	0.363	0.352	0.332	0.403	0.256	0.243	0.25	0.276	0.278	0.259	0.281	0.262	0.359	0.352	0.353	0.261	0.303	0.283	0.297	0.27	0.288	0.266	0.268	0.28		56.5	0.182	0.215	0.231	0.257	0.33	0.322	0.259	0.294	0.228	0.24	0.236	0.286	0.257	0.277	0.288	0.311	0.399	0.401	0.356
56.75	0.278	0.29	0.29	0.294	0.353	0.355	0.337	0.407	0.257	0.243	0.251	0.277	0.276	0.263	0.281	0.263	0.361	0.355	0.358	0.258	0.302	0.286	0.299	0.272	0.283	0.269	0.271	0.275		56.75	0.188	0.214	0.234	0.257	0.334	0.322	0.261	0.294	0.234	0.24	0.238	0.284	0.263	0.276	0.287	0.312	0.405	0.401	0.357
57	0.278	0.29	0.293	0.3	0.347	0.359	0.34	0.41	0.254	0.246	0.253	0.278	0.276	0.263	0.283	0.266	0.36	0.353	0.356	0.263	0.303	0.287	0.3	0.27	0.286	0.273	0.272	0.277		57	0.184	0.219	0.234	0.261	0.335	0.323	0.262	0.297	0.236	0.242	0.24	0.29	0.261	0.278	0.292	0.315	0.406	0.405	0.361
57.25	0.278	0.292	0.293	0.301	0.348	0.356	0.343	0.412	0.254	0.246	0.253	0.28	0.279	0.265	0.284	0.265	0.366	0.354	0.362	0.27	0.305	0.287	0.305	0.268	0.284	0.271	0.276	0.278		57.25	0.185	0.22	0.233	0.259	0.335	0.328	0.264	0.3	0.234	0.24	0.238	0.291	0.264	0.279	0.291	0.317	0.406	0.41	0.362
57.5	0.28	0.29	0.294	0.302	0.353	0.356	0.344	0.413	0.258	0.248	0.255	0.282	0.281	0.266	0.286	0.266	0.367	0.359	0.362	0.272	0.305	0.284	0.307	0.268	0.287	0.27	0.274	0.278		57.5	0.182	0.219	0.237	0.26	0.335	0.33	0.263	0.299	0.236	0.241	0.24	0.294	0.263	0.283	0.292	0.32	0.407	0.409	0.365
57.75	0.283	0.292	0.299	0.304	0.353	0.356	0.353	0.418	0.259	0.25	0.258	0.285	0.281	0.268	0.288	0.269	0.366	0.361	0.367	0.256	0.307	0.289	0.308	0.265	0.288	0.273	0.277	0.274		57.75	0.185	0.219	0.233	0.26	0.338	0.33	0.264	0.304	0.236	0.245	0.243	0.295	0.264	0.283	0.296	0.319	0.41	0.414	0.371
58	0.282	0.295	0.295	0.305	0.354	0.36	0.342	0.423	0.261	0.249	0.257	0.284	0.284	0.268	0.289	0.269	0.368	0.36	0.365	0.248	0.312	0.289	0.306	0.268	0.288	0.276	0.28	0.273		58	0.184	0.221	0.237	0.264	0.34	0.332	0.27	0.304	0.236	0.245	0.243	0.295	0.267	0.285	0.298	0.321	0.414	0.415	0.37
58.25	0.282	0.296	0.297	0.307	0.358	0.36	0.338	0.424	0.263	0.252	0.259	0.285	0.285	0.271	0.289	0.271	0.37	0.361	0.365	0.248	0.31	0.293	0.305	0.256	0.288	0.277	0.278	0.27		58.25	0.184	0.221	0.235	0.262	0.34	0.334	0.269	0.307	0.237	0.244	0.243	0.298	0.265	0.287	0.3	0.323	0.413	0.42	0.374
58.5	0.285	0.294	0.296	0.309	0.356	0.357	0.334	0.425	0.262	0.251	0.26	0.285	0.287	0.271	0.291	0.272	0.371	0.359	0.367	0.248	0.311	0.291	0.309	0.272	0.287	0.276	0.278	0.278		58.5	0.183	0.222	0.237	0.263	0.345	0.333	0.272	0.307	0.239	0.245	0.244	0.299	0.269	0.286	0.3	0.326	0.418	0.42	0.377
58.75	0.287	0.296	0.295	0.31	0.359	0.36	0.337	0.431	0.265	0.255	0.258	0.286	0.287	0.272	0.291	0.273	0.373	0.362	0.367	0.248	0.315	0.294	0.308	0.275	0.286	0.276	0.28	0.28		58.75	0.18	0.222	0.239	0.26	0.346	0.335	0.271	0.305	0.242	0.246	0.244	0.296	0.268	0.284	0.303	0.324	0.42	0.422	0.379
59	0.29	0.299	0.298	0.314	0.362	0.362	0.338	0.432	0.266	0.255	0.261	0.287	0.288	0.271	0.292	0.275	0.374	0.362	0.371	0.249	0.316	0.293	0.31	0.273	0.286	0.279	0.279	0.278		59	0.185	0.22	0.236	0.261	0.346	0.337	0.27	0.308	0.242	0.249	0.245	0.295	0.271	0.288	0.303	0.323	0.421	0.423	0.377
59.25	0.29	0.302	0.301	0.314	0.363	0.367	0.338	0.437	0.269	0.256	0.262	0.289	0.29	0.275	0.295	0.276	0.378	0.362	0.37	0.254	0.318	0.298	0.31	0.272	0.288	0.279	0.281	0.275		59.25	0.181	0.221	0.236	0.261	0.35	0.339	0.272	0.307	0.244	0.249	0.247	0.297	0.27	0.289	0.301	0.324	0.423	0.426	0.379
59.5	0.291	0.303	0.3	0.317	0.364	0.371	0.341	0.441	0.27	0.258	0.264	0.291	0.291	0.276	0.296	0.28	0.38	0.366	0.373	0.253	0.318	0.295	0.312	0.273	0.286	0.284	0.283	0.279		59.5	0.183	0.222	0.236	0.264	0.353	0.338	0.273	0.309	0.245	0.251	0.246	0.297	0.272	0.288	0.303	0.327	0.427	0.427	0.383
59.75	0.292	0.308	0.304	0.317	0.364	0.378	0.346	0.443	0.27	0.26	0.266	0.293	0.294	0.279	0.298	0.28	0.383	0.367	0.374	0.256	0.319	0.302	0.318	0.273	0.287	0.282	0.286	0.278		59.75	0.183	0.219	0.236	0.262	0.351	0.341	0.275	0.31	0.241	0.249	0.249	0.296	0.273	0.291	0.304	0.323	0.428	0.43	0.384
60	0.294	0.309	0.307	0.319	0.372	0.383	0.355	0.448	0.273	0.26	0.27	0.296	0.296	0.282	0.302	0.283	0.382	0.372	0.379	0.254	0.323	0.304	0.316	0.275	0.291	0.285	0.293	0.288		60	0.187	0.219	0.237	0.265	0.356	0.344	0.273	0.308	0.243	0.25	0.25	0.299	0.275	0.289	0.304	0.326	0.428	0.428	0.384
60.25	0.302	0.313	0.311	0.323	0.39	0.386	0.365	0.451	0.277	0.263	0.271	0.3	0.299	0.284	0.305	0.285	0.388	0.374	0.38	0.254	0.33	0.308	0.32	0.273	0.295	0.287	0.288	0.284		60.25	0.186	0.219	0.235	0.262	0.36	0.345	0.275	0.311	0.245	0.251	0.249	0.298	0.278	0.292	0.308	0.327	0.434	0.432	0.389
60.5	0.303	0.31	0.314	0.327	0.396	0.387	0.367	0.452	0.278	0.265	0.273	0.302	0.303	0.285	0.305	0.285	0.391	0.375	0.383	0.258	0.331	0.307	0.321	0.275	0.292	0.292	0.29	0.281		60.5	0.19	0.221	0.237	0.265	0.36	0.348	0.276	0.309	0.249	0.251	0.25	0.301	0.278	0.291	0.308	0.329	0.436	0.432	0.39
60.75	0.309	0.313	0.317	0.327	0.404	0.392	0.38	0.457	0.28	0.268	0.276	0.303	0.304	0.286	0.309	0.286	0.394	0.379	0.384	0.261	0.338	0.306	0.327	0.27	0.297	0.29	0.296	0.282		60.75	0.192	0.222	0.24	0.265	0.365	0.345	0.28	0.313	0.251	0.254	0.251	0.304	0.284	0.297	0.307	0.33	0.438	0.439	0.395
61	0.307	0.317	0.318	0.33	0.393	0.394	0.375	0.459	0.279	0.267	0.275	0.303	0.304	0.288	0.309	0.291	0.388	0.381	0.386	0.259	0.334	0.305	0.328	0.27	0.292	0.291	0.296	0.275		61	0.192	0.224	0.238	0.268	0.369	0.351	0.279	0.315	0.251	0.254	0.251	0.306	0.285	0.296	0.312	0.333	0.442	0.439	0.395
61.25	0.305	0.318	0.319	0.333	0.388	0.395	0.381	0.46	0.28	0.27	0.278	0.307	0.304	0.291	0.312	0.29	0.391	0.376	0.39	0.263	0.335	0.307	0.328	0.272	0.293	0.291	0.295	0.278		61.25	0.188	0.226	0.241	0.266	0.369	0.351	0.282	0.318	0.252	0.257	0.252	0.307	0.283	0.299	0.313	0.333	0.441	0.442	0.401
61.5	0.305	0.319	0.32	0.336	0.388	0.4	0.383	0.465	0.283	0.27	0.281	0.307	0.303	0.292	0.312	0.293	0.391	0.383	0.391	0.259	0.335	0.311	0.332	0.265	0.298	0.291	0.299	0.285		61.5	0.192	0.225	0.24	0.267	0.369	0.355	0.284	0.318	0.252	0.257	0.257	0.312	0.287	0.301	0.313	0.335	0.441	0.444	0.399
61.75	0.309	0.319	0.318	0.336	0.395	0.398	0.37	0.468	0.283	0.271	0.278	0.306	0.307	0.293	0.311	0.293	0.396	0.387	0.386	0.266	0.336	0.31	0.326	0.267	0.3	0.293	0.295	0.281		61.75	0.19	0.225	0.24	0.269	0.371	0.355	0.284	0.318	0.252	0.256	0.256	0.309	0.285	0.3	0.315	0.339	0.445	0.446	0.404
62	0.31	0.32	0.32	0.337	0.391	0.397	0.368	0.47	0.287	0.271	0.279	0.306	0.309	0.295	0.312	0.293	0.395	0.38	0.395	0.268	0.334	0.312	0.332	0.28	0.301	0.296	0.295	0.273		62	0.188	0.224	0.24	0.269	0.374	0.36	0.285	0.321	0.253	0.257	0.26	0.315	0.288	0.303	0.316	0.337	0.448	0.449	0.406
62.25	0.311	0.32	0.321	0.341	0.393	0.4	0.371	0.475	0.288	0.273	0.279	0.309	0.309	0.295	0.316	0.296	0.397	0.383	0.394	0.272	0.339	0.316	0.33	0.281	0.301	0.296	0.294	0.276		62.25	0.192	0.226	0.24	0.269	0.378	0.357	0.284	0.323	0.254	0.263	0.258	0.312	0.286	0.3	0.318	0.339	0.446	0.449	0.403
62.5	0.312	0.323	0.325	0.343	0.396	0.401	0.376	0.477	0.289	0.276	0.282	0.31	0.312	0.297	0.317	0.297	0.398	0.385	0.396	0.272	0.339	0.313	0.329	0.271	0.305	0.299	0.294	0.272		62.5	0.188	0.223	0.241	0.269	0.377	0.36	0.288	0.325	0.257	0.259	0.259	0.31	0.289	0.303	0.32	0.339	0.452	0.452	0.409
62.75	0.313	0.326	0.327	0.344	0.399	0.404	0.379	0.481	0.289	0.276	0.283	0.313	0.314	0.298	0.318	0.3	0.403	0.38	0.4	0.274	0.339	0.318	0.337	0.285	0.303	0.301	0.302	0.271		62.75	0.193	0.224	0.239	0.268	0.377	0.36	0.287	0.322	0.256	0.262	0.262	0.311	0.291	0.305	0.319	0.337	0.451	0.454	0.41
63	0.313	0.327	0.327	0.347	0.399	0.402	0.378	0.484	0.291	0.279	0.287	0.314	0.314	0.3	0.321	0.301	0.405	0.382	0.398	0.281	0.343	0.318	0.34	0.295	0.304	0.295	0.3	0.271		63	0.189	0.222	0.241	0.267	0.38	0.362	0.288	0.326	0.259	0.263	0.262	0.313	0.293	0.305	0.321	0.339	0.453	0.453	0.412
63.25	0.315	0.328	0.327	0.349	0.399	0.406	0.378	0.487	0.293	0.278	0.288	0.316	0.315	0.299	0.323	0.301	0.408	0.384	0.399	0.284	0.342	0.319	0.338	0.272	0.301	0.299	0.301	0.265		63.25	0.192	0.226	0.24	0.267	0.382	0.365	0.288	0.325	0.257	0.262	0.261	0.314	0.292	0.306	0.32	0.343	0.455	0.456	0.412
63.5	0.318	0.329	0.329	0.351	0.405	0.409	0.381	0.488	0.295	0.281	0.289	0.316	0.319	0.303	0.325	0.302	0.409	0.381	0.404	0.282	0.343	0.323	0.339	0.271	0.304	0.305	0.299	0.261		63.5	0.193	0.223	0.239	0.268	0.386	0.367	0.29	0.325	0.26	0.262	0.263	0.313	0.294	0.308	0.322	0.34	0.457	0.459	0.413
63.75	0.319	0.331	0.33	0.354	0.407	0.413	0.384	0.492	0.296	0.282	0.29	0.32	0.322	0.304	0.326	0.305	0.41	0.386	0.403	0.288	0.345	0.319	0.34	0.267	0.306	0.304	0.303	0.266		63.75	0.191	0.225	0.241	0.27	0.386	0.368	0.292	0.327	0.258	0.263	0.263	0.31	0.296	0.31	0.32	0.343	0.46	0.46	0.416
64	0.321	0.334	0.33	0.356	0.402	0.415	0.382	0.495	0.295	0.282	0.291	0.319	0.322	0.308	0.326	0.306	0.411	0.391	0.403	0.285	0.339	0.323	0.34	0.267	0.303	0.3	0.297	0.257		64	0.189	0.225	0.237	0.267	0.387	0.368	0.293	0.326	0.262	0.265	0.263	0.311	0.295	0.308	0.323	0.343	0.46	0.463	0.418
64.25	0.326	0.338	0.336	0.359	0.414	0.422	0.393	0.5	0.301	0.286	0.294	0.322	0.323	0.307	0.328	0.311	0.417	0.39	0.407	0.292	0.343	0.322	0.345	0.268	0.304	0.305	0.303	0.26		64.25	0.192	0.224	0.241	0.268	0.391	0.37	0.292	0.329	0.263	0.266	0.263	0.313	0.297	0.311	0.324	0.345	0.463	0.462	0.421
64.5	0.332	0.34	0.339	0.357	0.434	0.429	0.398	0.502	0.304	0.288	0.295	0.326	0.328	0.311	0.332	0.31	0.417	0.392	0.408	0.284	0.346	0.33	0.345	0.267	0.306	0.305	0.305	0.26		64.5	0.19	0.228	0.241	0.269	0.393	0.371	0.293	0.328	0.264	0.266	0.263	0.312	0.298	0.311	0.326	0.343	0.465	0.467	0.419
64.75	0.335	0.341	0.342	0.36	0.443	0.43	0.412	0.504	0.306	0.287	0.298	0.33	0.33	0.314	0.336	0.312	0.424	0.385	0.416	0.294	0.347	0.334	0.35	0.274	0.305	0.306	0.301	0.254		64.75	0.193	0.226	0.238	0.269	0.397	0.372	0.296	0.331	0.266	0.268	0.266	0.317	0.301	0.315	0.327	0.345	0.467	0.469	0.424
65	0.337	0.344	0.344	0.363	0.441	0.43	0.411	0.51	0.308	0.29	0.301	0.329	0.331	0.313	0.339	0.314	0.42	0.388	0.419	0.29	0.352	0.327	0.352	0.265	0.309	0.309	0.302	0.255		65	0.194	0.229	0.241	0.271	0.399	0.378	0.298	0.333	0.267	0.269	0.267	0.319	0.306	0.314	0.329	0.347	0.469	0.472	0.424
65.25	0.336	0.345	0.347	0.364	0.435	0.437	0.42	0.51	0.307	0.291	0.302	0.333	0.33	0.316	0.34	0.316	0.409	0.388	0.416	0.299	0.349	0.333	0.36	0.268	0.308	0.304	0.297	0.256		65.25	0.197	0.23	0.243	0.273	0.402	0.381	0.298	0.332	0.269	0.272	0.268	0.321	0.305	0.317	0.329	0.351	0.473	0.471	0.428
65.5	0.332	0.347	0.349	0.368	0.428	0.441	0.421	0.514	0.307	0.292	0.302	0.334	0.332	0.318	0.34	0.318	0.413	0.39	0.419	0.3	0.345	0.338	0.354	0.263	0.303	0.307	0.299	0.259		65.5	0.197	0.23	0.243	0.271	0.406	0.38	0.3	0.334	0.268	0.272	0.269	0.323	0.304	0.319	0.331	0.351	0.474	0.474	0.431
65.75	0.336	0.347	0.347	0.367	0.432	0.441	0.41	0.516	0.31	0.293	0.304	0.333	0.332	0.32	0.34	0.32	0.417	0.386	0.416	0.304	0.348	0.336	0.352	0.266	0.306	0.309	0.291	0.264		65.75	0.195	0.229	0.246	0.274	0.403	0.381	0.298	0.338	0.269	0.271	0.271	0.326	0.304	0.318	0.334	0.354	0.474	0.474	0.433
66	0.338	0.35	0.346	0.37	0.435	0.444	0.407	0.52	0.309	0.298	0.305	0.333	0.339	0.321	0.342	0.322	0.422	0.386	0.422	0.302	0.354	0.342	0.352	0.266	0.308	0.311	0.293	0.264		66	0.194	0.228	0.246	0.271	0.408	0.384	0.303	0.339	0.27	0.275	0.271	0.326	0.305	0.319	0.334	0.352	0.474	0.475	0.435
66.25	0.34	0.352	0.348	0.374	0.434	0.443	0.409	0.522	0.313	0.297	0.306	0.336	0.338	0.321	0.343	0.321	0.421	0.377	0.418	0.305	0.35	0.34	0.355	0.267	0.312	0.312	0.289	0.253		66.25	0.193	0.232	0.245	0.272	0.409	0.386	0.303	0.34	0.272	0.273	0.274	0.326	0.303	0.324	0.337	0.352	0.475	0.48	0.439
66.5	0.342	0.351	0.35	0.375	0.433	0.44	0.408	0.524	0.315	0.299	0.308	0.335	0.339	0.324	0.345	0.322	0.426	0.378	0.424	0.304	0.352	0.338	0.356	0.28	0.312	0.313	0.285	0.253		66.5	0.192	0.23	0.243	0.272	0.407	0.387	0.303	0.339	0.272	0.276	0.273	0.327	0.307	0.324	0.337	0.355	0.475	0.481	0.437
66.75	0.343	0.353	0.352	0.376	0.437	0.442	0.412	0.529	0.318	0.299	0.308	0.339	0.342	0.323	0.348	0.323	0.427	0.378	0.42	0.311	0.35	0.338	0.357	0.288	0.311	0.315	0.281	0.254		66.75	0.194	0.229	0.242	0.27	0.409	0.386	0.303	0.34	0.271	0.275	0.274	0.324	0.308	0.323	0.339	0.356	0.472	0.481	0.439
67	0.342	0.355	0.353	0.379	0.441	0.445	0.41	0.533	0.318	0.301	0.312	0.34	0.342	0.326	0.349	0.328	0.429	0.375	0.427	0.314	0.35	0.339	0.36	0.286	0.308	0.307	0.28	0.255		67	0.194	0.23	0.245	0.27	0.411	0.387	0.306	0.341	0.274	0.276	0.275	0.325	0.309	0.323	0.339	0.355	0.476	0.482	0.442
67.25	0.346	0.355	0.354	0.378	0.443	0.446	0.412	0.532	0.318	0.302	0.312	0.341	0.345	0.329	0.349	0.328	0.431	0.374	0.43	0.308	0.347	0.343	0.359	0.279	0.31	0.312	0.296	0.253		67.25	0.194	0.232	0.243	0.27	0.414	0.39	0.305	0.341	0.273	0.276	0.275	0.326	0.311	0.326	0.338	0.355	0.48	0.484	0.441
67.5	0.344	0.357	0.356	0.383	0.44	0.448	0.415	0.539	0.32	0.305	0.313	0.345	0.344	0.332	0.352	0.329	0.427	0.373	0.431	0.311	0.352	0.346	0.359	0.28	0.314	0.314	0.295	0.258		67.5	0.195	0.227	0.243	0.272	0.417	0.392	0.306	0.342	0.274	0.276	0.277	0.325	0.313	0.326	0.342	0.354	0.481	0.485	0.443
67.75	0.35	0.358	0.361	0.383	0.445	0.449	0.426	0.54	0.32	0.305	0.317	0.347	0.348	0.33	0.356	0.332	0.429	0.376	0.434	0.316	0.353	0.348	0.364	0.285	0.312	0.31	0.291	0.255		67.75	0.19	0.233	0.245	0.272	0.417	0.394	0.307	0.343	0.275	0.28	0.276	0.327	0.312	0.326	0.341	0.357	0.483	0.487	0.444
68	0.35	0.364	0.367	0.385	0.45	0.458	0.445	0.542	0.324	0.307	0.32	0.351	0.349	0.334	0.361	0.332	0.437	0.377	0.436	0.319	0.36	0.348	0.369	0.282	0.319	0.319	0.297	0.256		68	0.194	0.231	0.245	0.273	0.419	0.394	0.311	0.343	0.277	0.282	0.279	0.327	0.315	0.328	0.341	0.358	0.482	0.489	0.447
68.25	0.352	0.365	0.369	0.387	0.451	0.462	0.441	0.546	0.324	0.309	0.322	0.352	0.351	0.335	0.363	0.337	0.436	0.379	0.439	0.325	0.352	0.347	0.368	0.282	0.321	0.316	0.286	0.26		68.25	0.194	0.23	0.244	0.27	0.422	0.398	0.31	0.345	0.278	0.282	0.278	0.329	0.316	0.331	0.344	0.363	0.481	0.491	0.447
68.5	0.353	0.368	0.37	0.389	0.45	0.469	0.448	0.55	0.325	0.312	0.325	0.355	0.354	0.338	0.364	0.339	0.438	0.377	0.441	0.328	0.35	0.35	0.373	0.288	0.318	0.32	0.285	0.263		68.5	0.196	0.232	0.245	0.275	0.426	0.397	0.313	0.348	0.281	0.28	0.279	0.33	0.317	0.33	0.344	0.363	0.481	0.494	0.45
68.75	0.354	0.37	0.372	0.392	0.455	0.467	0.448	0.553	0.327	0.313	0.325	0.356	0.354	0.34	0.366	0.337	0.432	0.382	0.443	0.328	0.359	0.346	0.371	0.28	0.312	0.321	0.281	0.259		68.75	0.195	0.233	0.243	0.277	0.429	0.399	0.314	0.348	0.28	0.281	0.281	0.335	0.32	0.332	0.346	0.363	0.485	0.494	0.455
69	0.363	0.372	0.377	0.393	0.471	0.473	0.456	0.554	0.331	0.314	0.326	0.359	0.358	0.342	0.369	0.341	0.442	0.386	0.446	0.334	0.363	0.349	0.368	0.288	0.325	0.323	0.278	0.26		69	0.197	0.232	0.246	0.274	0.431	0.399	0.317	0.35	0.282	0.283	0.28	0.335	0.32	0.334	0.348	0.367	0.485	0.496	0.453
69.25	0.37	0.373	0.374	0.393	0.489	0.477	0.45	0.559	0.334	0.315	0.327	0.36	0.362	0.343	0.369	0.343	0.446	0.382	0.449	0.331	0.364	0.354	0.371	0.287	0.325	0.322	0.278	0.268		69.25	0.196	0.232	0.247	0.273	0.434	0.402	0.316	0.351	0.284	0.285	0.284	0.336	0.322	0.334	0.347	0.366	0.49	0.498	0.456
69.5	0.367	0.375	0.375	0.398	0.483	0.479	0.445	0.562	0.335	0.318	0.329	0.359	0.362	0.346	0.368	0.344	0.441	0.382	0.446	0.331	0.368	0.354	0.369	0.287	0.32	0.324	0.277	0.264		69.5	0.197	0.233	0.246	0.274	0.437	0.405	0.317	0.351	0.285	0.285	0.284	0.335	0.326	0.336	0.349	0.364	0.49	0.497	0.456
69.75	0.37	0.377	0.375	0.398	0.485	0.485	0.444	0.563	0.337	0.319	0.329	0.36	0.364	0.349	0.371	0.346	0.442	0.381	0.444	0.336	0.37	0.357	0.372	0.294	0.325	0.321	0.278	0.268		69.75	0.196	0.235	0.247	0.274	0.44	0.403	0.32	0.354	0.286	0.286	0.286	0.337	0.325	0.338	0.351	0.37	0.487	0.503	0.462
70	0.366	0.377	0.375	0.401	0.476	0.487	0.444	0.567	0.337	0.322	0.33	0.362	0.365	0.349	0.372	0.349	0.435	0.407	0.452	0.339	0.367	0.357	0.374	0.292	0.33	0.321	0.274	0.274		70	0.199	0.235	0.247	0.273	0.439	0.407	0.322	0.354	0.287	0.286	0.285	0.336	0.324	0.339	0.353	0.367	0.485	0.504	0.463
70.25	0.368	0.381	0.376	0.403	0.476	0.484	0.445	0.572	0.339	0.323	0.332	0.363	0.366	0.35	0.375	0.348	0.438	0.406	0.45	0.341	0.364	0.357	0.376	0.289	0.334	0.321	0.3	0.271		70.25	0.197	0.236	0.247	0.274	0.44	0.407	0.321	0.353	0.286	0.287	0.289	0.337	0.326	0.339	0.353	0.368	0.488	0.502	0.463
70.5	0.371	0.379	0.378	0.405	0.481	0.483	0.447	0.576	0.34	0.323	0.334	0.364	0.368	0.353	0.376	0.35	0.445	0.391	0.455	0.336	0.364	0.36	0.376	0.29	0.335	0.321	0.311	0.268		70.5	0.196	0.234	0.244	0.273	0.443	0.41	0.32	0.353	0.288	0.288	0.287	0.338	0.33	0.34	0.353	0.368	0.489	0.507	0.463
70.75	0.373	0.382	0.378	0.406	0.482	0.484	0.445	0.577	0.341	0.325	0.335	0.366	0.37	0.353	0.377	0.351	0.447	0.39	0.455	0.341	0.367	0.36	0.377	0.297	0.338	0.32	0.317	0.275		70.75	0.196	0.238	0.244	0.271	0.444	0.409	0.321	0.353	0.288	0.292	0.289	0.336	0.327	0.341	0.354	0.368	0.493	0.507	0.465
71	0.374	0.382	0.385	0.408	0.482	0.482	0.459	0.582	0.342	0.327	0.338	0.371	0.372	0.353	0.38	0.354	0.444	0.379	0.456	0.348	0.369	0.361	0.381	0.3	0.324	0.31	0.328	0.281		71	0.198	0.235	0.242	0.271	0.448	0.412	0.323	0.355	0.288	0.292	0.288	0.336	0.331	0.342	0.354	0.369	0.493	0.51	0.464
71.25	0.374	0.387	0.385	0.412	0.483	0.488	0.466	0.585	0.344	0.327	0.341	0.371	0.371	0.359	0.383	0.354	0.442	0.392	0.461	0.338	0.371	0.362	0.387	0.304	0.341	0.311	0.318	0.28		71.25	0.197	0.237	0.243	0.276	0.449	0.416	0.323	0.355	0.29	0.294	0.286	0.338	0.332	0.344	0.354	0.368	0.497	0.51	0.466
71.5	0.376	0.388	0.391	0.412	0.487	0.492	0.469	0.587	0.346	0.328	0.341	0.374	0.376	0.361	0.385	0.356	0.447	0.394	0.463	0.34	0.363	0.366	0.384	0.298	0.336	0.314	0.323	0.284		71.5	0.199	0.233	0.244	0.27	0.451	0.415	0.323	0.355	0.293	0.291	0.288	0.338	0.332	0.344	0.354	0.371	0.499	0.51	0.465
71.75	0.378	0.389	0.391	0.417	0.489	0.492	0.473	0.589	0.348	0.33	0.343	0.375	0.376	0.359	0.387	0.358	0.436	0.386	0.462	0.344	0.366	0.361	0.387	0.302	0.337	0.302	0.33	0.282		71.75	0.196	0.234	0.245	0.272	0.453	0.416	0.324	0.359	0.292	0.292	0.287	0.343	0.334	0.343	0.355	0.374	0.496	0.511	0.469
72	0.38	0.393	0.393	0.417	0.489	0.495	0.476	0.595	0.349	0.33	0.346	0.379	0.378	0.363	0.389	0.361	0.44	0.392	0.465	0.351	0.366	0.362	0.389	0.307	0.334	0.305	0.334	0.288		72	0.197	0.234	0.244	0.276	0.455	0.418	0.328	0.358	0.293	0.293	0.291	0.342	0.333	0.346	0.361	0.372	0.49	0.514	0.472
72.25	0.383	0.397	0.399	0.417	0.493	0.51	0.492	0.596	0.352	0.336	0.349	0.383	0.38	0.365	0.392	0.365	0.45	0.392	0.472	0.346	0.374	0.371	0.393	0.303	0.339	0.299	0.337	0.283		72.25	0.195	0.231	0.247	0.273	0.456	0.417	0.33	0.36	0.295	0.295	0.292	0.345	0.334	0.346	0.361	0.378	0.493	0.516	0.472
72.5	0.383	0.399	0.4	0.42	0.494	0.51	0.49	0.601	0.351	0.336	0.35	0.384	0.382	0.366	0.394	0.365	0.441	0.394	0.476	0.35	0.376	0.371	0.395	0.305	0.342	0.305	0.336	0.29		72.5	0.198	0.227	0.251	0.275	0.457	0.419	0.33	0.364	0.295	0.295	0.295	0.347	0.334	0.347	0.362	0.375	0.492	0.515	0.474
72.75	0.386	0.401	0.401	0.421	0.498	0.517	0.491	0.601	0.355	0.339	0.351	0.384	0.383	0.37	0.394	0.367	0.439	0.393	0.474	0.358	0.373	0.371	0.393	0.305	0.341	0.305	0.338	0.29		72.75	0.196	0.232	0.247	0.275	0.46	0.422	0.329	0.365	0.294	0.298	0.297	0.348	0.335	0.348	0.362	0.379	0.485	0.519	0.477
73	0.387	0.403	0.4	0.424	0.502	0.52	0.485	0.604	0.358	0.34	0.352	0.385	0.386	0.371	0.397	0.37	0.442	0.399	0.472	0.361	0.373	0.376	0.391	0.307	0.338	0.31	0.342	0.287		73	0.196	0.231	0.246	0.274	0.46	0.422	0.332	0.364	0.297	0.297	0.295	0.35	0.339	0.348	0.365	0.378	0.492	0.518	0.478
73.25	0.389	0.407	0.401	0.425	0.499	0.524	0.479	0.608	0.358	0.341	0.354	0.387	0.387	0.374	0.396	0.372	0.45	0.404	0.476	0.359	0.383	0.376	0.386	0.331	0.334	0.324	0.331	0.294		73.25	0.196	0.231	0.246	0.276	0.463	0.424	0.336	0.364	0.297	0.298	0.297	0.349	0.34	0.35	0.366	0.379	0.489	0.521	0.481
73.5	0.39	0.406	0.402	0.427	0.503	0.525	0.482	0.61	0.359	0.343	0.354	0.387	0.39	0.375	0.399	0.373	0.448	0.402	0.478	0.361	0.375	0.373	0.389	0.325	0.334	0.332	0.339	0.291		73.5	0.195	0.231	0.248	0.274	0.465	0.428	0.335	0.364	0.296	0.3	0.296	0.351	0.337	0.354	0.367	0.38	0.49	0.523	0.484
73.75	0.392	0.406	0.403	0.431	0.504	0.518	0.481	0.613	0.36	0.344	0.355	0.388	0.391	0.377	0.399	0.372	0.447	0.404	0.476	0.369	0.375	0.367	0.39	0.334	0.34	0.327	0.347	0.295		73.75	0.195	0.234	0.247	0.272	0.468	0.428	0.334	0.364	0.299	0.299	0.297	0.347	0.342	0.353	0.369	0.379	0.485	0.521	0.48
74	0.397	0.407	0.406	0.432	0.513	0.518	0.482	0.617	0.363	0.345	0.358	0.39	0.394	0.378	0.401	0.374	0.459	0.406	0.478	0.362	0.382	0.37	0.395	0.324	0.338	0.327	0.343	0.298		74	0.194	0.232	0.249	0.273	0.47	0.431	0.335	0.364	0.298	0.302	0.298	0.349	0.34	0.353	0.368	0.382	0.477	0.526	0.481
74.25	0.401	0.409	0.409	0.434	0.525	0.521	0.483	0.621	0.37	0.346	0.36	0.393	0.397	0.38	0.403	0.377	0.453	0.403	0.484	0.37	0.393	0.368	0.391	0.322	0.342	0.331	0.347	0.296		74.25	0.198	0.235	0.244	0.273	0.474	0.433	0.338	0.367	0.301	0.306	0.299	0.348	0.344	0.357	0.365	0.379	0.477	0.528	0.484
74.5	0.404	0.409	0.413	0.435	0.537	0.519	0.495	0.624	0.369	0.347	0.361	0.394	0.401	0.383	0.407	0.377	0.459	0.408	0.485	0.374	0.395	0.367	0.396	0.313	0.347	0.327	0.353	0.292		74.5	0.202	0.237	0.246	0.274	0.476	0.434	0.338	0.364	0.306	0.305	0.301	0.349	0.348	0.357	0.37	0.38	0.475	0.527	0.483
74.75	0.408	0.411	0.416	0.438	0.548	0.522	0.503	0.626	0.374	0.349	0.365	0.397	0.403	0.382	0.409	0.38	0.458	0.409	0.485	0.371	0.403	0.366	0.401	0.322	0.349	0.329	0.35	0.292		74.75	0.201	0.235	0.245	0.27	0.477	0.435	0.338	0.367	0.305	0.304	0.302	0.351	0.347	0.358	0.368	0.383	0.48	0.529	0.485
75	0.405	0.414	0.421	0.442	0.533	0.523	0.51	0.63	0.373	0.349	0.367	0.4	0.403	0.384	0.414	0.38	0.452	0.408	0.491	0.377	0.399	0.367	0.405	0.336	0.345	0.34	0.356	0.284		75	0.204	0.234	0.244	0.271	0.481	0.435	0.339	0.368	0.307	0.304	0.302	0.353	0.35	0.356	0.371	0.384	0.478	0.525	0.488
75.25	0.406	0.414	0.424	0.445	0.53	0.527	0.515	0.635	0.373	0.35	0.37	0.403	0.404	0.385	0.414	0.382	0.448	0.41	0.487	0.371	0.398	0.373	0.41	0.337	0.343	0.338	0.355	0.283		75.25	0.199	0.231	0.247	0.273	0.482	0.437	0.34	0.37	0.305	0.306	0.299	0.352	0.351	0.357	0.372	0.385	0.478	0.527	0.489
75.5	0.406	0.419	0.423	0.446	0.532	0.533	0.516	0.635	0.378	0.353	0.368	0.404	0.406	0.387	0.416	0.384	0.447	0.416	0.495	0.378	0.402	0.375	0.408	0.33	0.344	0.336	0.359	0.282		75.5	0.2	0.234	0.244	0.275	0.483	0.439	0.34	0.37	0.308	0.306	0.303	0.356	0.351	0.358	0.373	0.386	0.472	0.531	0.491
75.75	0.41	0.421	0.427	0.449	0.532	0.541	0.525	0.64	0.377	0.356	0.372	0.407	0.406	0.388	0.419	0.387	0.446	0.416	0.495	0.374	0.402	0.378	0.406	0.32	0.343	0.337	0.368	0.278		75.75	0.198	0.23	0.246	0.274	0.485	0.44	0.341	0.373	0.307	0.308	0.305	0.357	0.351	0.358	0.374	0.385	0.478	0.534	0.492
76	0.412	0.423	0.43	0.45	0.536	0.543	0.529	0.644	0.378	0.358	0.376	0.41	0.409	0.392	0.423	0.39	0.453	0.414	0.493	0.383	0.402	0.373	0.413	0.32	0.345	0.335	0.37	0.285		76	0.2	0.23	0.247	0.272	0.487	0.442	0.343	0.374	0.307	0.307	0.305	0.361	0.352	0.362	0.373	0.389	0.482	0.534	0.492
76.25	0.412	0.424	0.428	0.453	0.537	0.547	0.523	0.649	0.38	0.36	0.376	0.409	0.412	0.395	0.423	0.392	0.466	0.418	0.494	0.379	0.398	0.379	0.406	0.322	0.358	0.338	0.366	0.278		76.25	0.197	0.231	0.246	0.277	0.489	0.441	0.343	0.375	0.309	0.308	0.305	0.36	0.354	0.363	0.376	0.391	0.468	0.536	0.489
76.5	0.415	0.428	0.428	0.454	0.538	0.547	0.516	0.651	0.383	0.361	0.376	0.41	0.412	0.398	0.424	0.393	0.47	0.422	0.496	0.382	0.401	0.382	0.414	0.318	0.355	0.342	0.367	0.28		76.5	0.197	0.232	0.247	0.276	0.488	0.446	0.346	0.376	0.312	0.308	0.309	0.363	0.355	0.363	0.378	0.391	0.474	0.536	0.491
76.75	0.415	0.43	0.432	0.456	0.539	0.551	0.515	0.655	0.384	0.363	0.378	0.411	0.413	0.399	0.425	0.396	0.471	0.421	0.493	0.39	0.396	0.387	0.412	0.321	0.357	0.346	0.37	0.28		76.75	0.198	0.232	0.247	0.273	0.491	0.447	0.348	0.377	0.31	0.31	0.309	0.363	0.356	0.364	0.38	0.393	0.471	0.539	0.491
77	0.418	0.43	0.432	0.459	0.544	0.555	0.515	0.658	0.387	0.365	0.378	0.411	0.416	0.402	0.425	0.396	0.466	0.427	0.499	0.387	0.412	0.384	0.411	0.327	0.354	0.349	0.37	0.283		77	0.198	0.234	0.246	0.274	0.493	0.448	0.348	0.376	0.311	0.312	0.309	0.36	0.357	0.367	0.381	0.391	0.473	0.539	0.491
77.25	0.421	0.435	0.432	0.464	0.545	0.558	0.519	0.662	0.386	0.366	0.381	0.414	0.416	0.402	0.429	0.397	0.454	0.423	0.497	0.397	0.409	0.389	0.414	0.331	0.358	0.347	0.37	0.286		77.25	0.198	0.232	0.246	0.276	0.496	0.449	0.347	0.374	0.311	0.311	0.31	0.363	0.356	0.366	0.379	0.393	0.472	0.539	0.495
77.5	0.421	0.435	0.435	0.465	0.546	0.561	0.521	0.664	0.389	0.368	0.381	0.415	0.418	0.404	0.43	0.4	0.459	0.427	0.502	0.394	0.411	0.39	0.415	0.322	0.362	0.357	0.364	0.285		77.5	0.198	0.235	0.247	0.274	0.497	0.449	0.346	0.376	0.313	0.316	0.31	0.359	0.358	0.367	0.382	0.391	0.463	0.539	0.489
77.75	0.424	0.437	0.436	0.466	0.549	0.557	0.523	0.666	0.391	0.369	0.384	0.42	0.423	0.405	0.431	0.403	0.456	0.431	0.501	0.398	0.407	0.387	0.418	0.322	0.359	0.351	0.377	0.289		77.75	0.197	0.234	0.247	0.272	0.498	0.451	0.35	0.377	0.314	0.314	0.311	0.359	0.358	0.37	0.383	0.392	0.462	0.542	0.491
78	0.427	0.438	0.439	0.47	0.553	0.559	0.531	0.671	0.392	0.372	0.386	0.422	0.424	0.408	0.435	0.404	0.457	0.445	0.51	0.398	0.417	0.395	0.417	0.332	0.363	0.354	0.384	0.291		78	0.2	0.234	0.247	0.271	0.499	0.452	0.351	0.379	0.317	0.315	0.311	0.36	0.359	0.369	0.384	0.393	0.458	0.539	0.489
78.25	0.428	0.441	0.443	0.471	0.554	0.561	0.54	0.673	0.395	0.374	0.389	0.426	0.423	0.408	0.438	0.404	0.457	0.449	0.504	0.399	0.41	0.388	0.426	0.33	0.363	0.352	0.377	0.285		78.25	0.199	0.231	0.246	0.272	0.502	0.453	0.351	0.379	0.314	0.315	0.309	0.361	0.36	0.37	0.382	0.394	0.471	0.541	0.491
78.5	0.428	0.442	0.45	0.474	0.554	0.563	0.552	0.678	0.397	0.374	0.392	0.429	0.428	0.41	0.442	0.407	0.465	0.451	0.51	0.402	0.404	0.385	0.429	0.339	0.368	0.352	0.389	0.286		78.5	0.199	0.234	0.246	0.271	0.504	0.455	0.352	0.378	0.316	0.317	0.313	0.361	0.362	0.37	0.382	0.394	0.463	0.542	0.486
78.75	0.431	0.442	0.452	0.476	0.558	0.561	0.552	0.679	0.398	0.376	0.395	0.43	0.43	0.412	0.443	0.407	0.467	0.451	0.511	0.406	0.411	0.383	0.431	0.333	0.367	0.359	0.388	0.286		78.75	0.197	0.234	0.247	0.273	0.504	0.457	0.35	0.381	0.318	0.321	0.311	0.365	0.364	0.372	0.384	0.395	0.459	0.545	0.476
79	0.433	0.444	0.453	0.479	0.56	0.563	0.553	0.683	0.398	0.379	0.395	0.431	0.433	0.415	0.445	0.41	0.463	0.456	0.513	0.408	0.408	0.385	0.432	0.335	0.371	0.357	0.388	0.282		79	0.193	0.234	0.248	0.271	0.505	0.459	0.356	0.381	0.318	0.318	0.315	0.366	0.362	0.372	0.387	0.398	0.461	0.545	0.482
79.25	0.441	0.447	0.454	0.48	0.576	0.569	0.558	0.684	0.403	0.381	0.396	0.434	0.436	0.416	0.447	0.412	0.467	0.457	0.512	0.409	0.415	0.384	0.431	0.336	0.379	0.365	0.384	0.286		79.25	0.198	0.233	0.245	0.273	0.507	0.46	0.354	0.383	0.319	0.32	0.315	0.368	0.367	0.374	0.385	0.397	0.463	0.545	0.478
79.5	0.445	0.458	0.462	0.482	0.586	0.574	0.573	0.689	0.407	0.381	0.401	0.437	0.439	0.418	0.452	0.415	0.472	0.459	0.521	0.404	0.414	0.388	0.435	0.34	0.373	0.362	0.395	0.343		79.5	0.199	0.233	0.247	0.276	0.51	0.461	0.356	0.383	0.321	0.32	0.316	0.37	0.368	0.376	0.389	0.401	0.464	0.547	0.478
79.75	0.448	0.458	0.457	0.484	0.596	0.577	0.556	0.691	0.41	0.385	0.4	0.436	0.442	0.422	0.449	0.415	0.48	0.457	0.515	0.412	0.429	0.395	0.43	0.343	0.374	0.367	0.386	0.359		79.75	0.197	0.235	0.243	0.274	0.513	0.462	0.358	0.387	0.323	0.321	0.315	0.371	0.37	0.375	0.389	0.399	0.454	0.545	0.481
80	0.449	0.462	0.457	0.487	0.595	0.582	0.553	0.696	0.411	0.386	0.401	0.437	0.443	0.423	0.452	0.418	0.476	0.462	0.518	0.413	0.42	0.388	0.432	0.34	0.381	0.367	0.387	0.36		80	0.2	0.233	0.25	0.273	0.517	0.463	0.358	0.384	0.325	0.319	0.32	0.373	0.371	0.378	0.391	0.405	0.457	0.548	0.482
80.25	0.446	0.464	0.457	0.488	0.583	0.586	0.553	0.699	0.411	0.389	0.403	0.439	0.441	0.425	0.454	0.422	0.48	0.461	0.524	0.406	0.415	0.389	0.43	0.343	0.378	0.374	0.397	0.356		80.25	0.199	0.231	0.246	0.274	0.517	0.465	0.36	0.388	0.326	0.322	0.318	0.371	0.372	0.379	0.392	0.402	0.447	0.547	0.484
80.5	0.449	0.464	0.458	0.493	0.584	0.588	0.556	0.702	0.412	0.389	0.404	0.442	0.447	0.426	0.454	0.422	0.476	0.469	0.521	0.408	0.421	0.398	0.429	0.356	0.375	0.378	0.399	0.354		80.5	0.202	0.235	0.247	0.272	0.519	0.466	0.359	0.387	0.326	0.323	0.319	0.369	0.37	0.379	0.393	0.401	0.446	0.549	0.488
80.75	0.45	0.467	0.461	0.494	0.584	0.591	0.553	0.704	0.414	0.392	0.406	0.442	0.447	0.429	0.456	0.425	0.479	0.471	0.521	0.413	0.417	0.392	0.433	0.345	0.388	0.374	0.399	0.334		80.75	0.198	0.234	0.247	0.272	0.522	0.47	0.361	0.387	0.326	0.326	0.322	0.37	0.373	0.379	0.392	0.403	0.445	0.548	0.481
81	0.45	0.468	0.463	0.496	0.582	0.597	0.558	0.709	0.415	0.393	0.407	0.443	0.447	0.431	0.457	0.427	0.472	0.472	0.525	0.423	0.408	0.395	0.434	0.355	0.382	0.372	0.394	0.333		81	0.202	0.232	0.246	0.274	0.521	0.469	0.361	0.387	0.329	0.326	0.322	0.369	0.375	0.38	0.392	0.403	0.457	0.551	0.483
81.25	0.454	0.472	0.464	0.5	0.588	0.598	0.56	0.71	0.418	0.396	0.41	0.444	0.451	0.433	0.459	0.428	0.48	0.476	0.525	0.435	0.423	0.388	0.426	0.356	0.378	0.376	0.401	0.327		81.25	0.201	0.233	0.246	0.274	0.522	0.471	0.361	0.386	0.329	0.327	0.322	0.372	0.374	0.381	0.393	0.402	0.452	0.547	0.484
81.5	0.452	0.471	0.469	0.502	0.585	0.598	0.571	0.713	0.419	0.395	0.411	0.449	0.451	0.435	0.465	0.431	0.468	0.473	0.527	0.435	0.43	0.384	0.439	0.349	0.374	0.371	0.407	0.318		81.5	0.198	0.234	0.246	0.271	0.525	0.473	0.362	0.39	0.33	0.327	0.322	0.37	0.374	0.381	0.393	0.403	0.434	0.551	0.481
81.75	0.456	0.473	0.473	0.505	0.591	0.599	0.582	0.717	0.423	0.398	0.415	0.452	0.453	0.437	0.469	0.431	0.476	0.469	0.534	0.439	0.431	0.402	0.445	0.352	0.387	0.376	0.405	0.319		81.75	0.194	0.235	0.248	0.271	0.525	0.474	0.363	0.388	0.327	0.328	0.325	0.371	0.375	0.386	0.394	0.405	0.438	0.551	0.482
82	0.459	0.474	0.475	0.509	0.594	0.598	0.584	0.72	0.426	0.399	0.418	0.454	0.456	0.437	0.469	0.433	0.472	0.481	0.54	0.439	0.434	0.395	0.447	0.347	0.384	0.378	0.417	0.348		82	0.196	0.235	0.246	0.27	0.527	0.474	0.363	0.392	0.332	0.331	0.322	0.371	0.374	0.385	0.394	0.404	0.429	0.554	0.481
82.25	0.459	0.477	0.479	0.511	0.595	0.598	0.591	0.723	0.424	0.402	0.422	0.457	0.457	0.441	0.471	0.434	0.473	0.478	0.54	0.433	0.424	0.394	0.449	0.35	0.39	0.379	0.42	0.353		82.25	0.199	0.235	0.246	0.274	0.53	0.475	0.367	0.393	0.332	0.328	0.324	0.376	0.377	0.387	0.397	0.408	0.421	0.553	0.478
82.5	0.462	0.477	0.482	0.512	0.603	0.6	0.6	0.727	0.429	0.403	0.423	0.461	0.459	0.441	0.476	0.435	0.47	0.48	0.541	0.438	0.431	0.4	0.456	0.355	0.386	0.385	0.418	0.343		82.5	0.197	0.232	0.249	0.274	0.53	0.477	0.366	0.391	0.335	0.332	0.326	0.377	0.381	0.386	0.401	0.407	0.411	0.547	0.484
82.75	0.469	0.481	0.484	0.514	0.618	0.602	0.601	0.733	0.431	0.404	0.426	0.464	0.464	0.443	0.477	0.438	0.478	0.481	0.541	0.436	0.434	0.405	0.457	0.351	0.385	0.38	0.422	0.326		82.75	0.199	0.234	0.249	0.275	0.531	0.477	0.367	0.394	0.334	0.331	0.328	0.379	0.381	0.386	0.4	0.409	0.423	0.548	0.478
83	0.471	0.48	0.484	0.517	0.623	0.602	0.594	0.735	0.434	0.405	0.426	0.463	0.467	0.447	0.477	0.44	0.485	0.485	0.542	0.444	0.435	0.399	0.453	0.356	0.382	0.388	0.42	0.321		83	0.197	0.233	0.247	0.274	0.534	0.479	0.368	0.395	0.336	0.331	0.328	0.383	0.38	0.39	0.402	0.411	0.415	0.55	0.475
83.25	0.473	0.483	0.482	0.52	0.626	0.612	0.589	0.736	0.436	0.409	0.426	0.462	0.469	0.447	0.479	0.443	0.48	0.486	0.543	0.451	0.444	0.407	0.447	0.359	0.395	0.393	0.423	0.315		83.25	0.203	0.232	0.249	0.276	0.537	0.482	0.37	0.395	0.338	0.333	0.331	0.38	0.382	0.391	0.403	0.412	0.421	0.55	0.469
83.5	0.476	0.487	0.485	0.522	0.63	0.616	0.59	0.741	0.438	0.412	0.428	0.467	0.471	0.45	0.481	0.444	0.479	0.495	0.544	0.454	0.448	0.408	0.454	0.359	0.391	0.392	0.424	0.313		83.5	0.202	0.235	0.247	0.273	0.536	0.482	0.369	0.396	0.335	0.334	0.328	0.382	0.383	0.389	0.403	0.412	0.411	0.549	0.473
83.75	0.474	0.49	0.484	0.524	0.621	0.619	0.59	0.744	0.437	0.412	0.429	0.467	0.471	0.454	0.483	0.448	0.483	0.494	0.549	0.447	0.435	0.411	0.457	0.357	0.386	0.395	0.42	0.305		83.75	0.201	0.232	0.247	0.271	0.539	0.482	0.37	0.396	0.338	0.336	0.331	0.379	0.385	0.39	0.404	0.411	0.417	0.549	0.475
84	0.475	0.493	0.486	0.527	0.621	0.625	0.589	0.749	0.439	0.416	0.432	0.467	0.473	0.455	0.485	0.45	0.478	0.495	0.544	0.458	0.438	0.415	0.452	0.356	0.391	0.394	0.426	0.347		84	0.2	0.232	0.248	0.274	0.54	0.485	0.371	0.397	0.344	0.335	0.328	0.382	0.385	0.389	0.403	0.414	0.404	0.543	0.468
84.25	0.478	0.494	0.487	0.529	0.624	0.628	0.592	0.751	0.442	0.418	0.433	0.471	0.476	0.456	0.487	0.452	0.48	0.494	0.55	0.46	0.439	0.418	0.455	0.368	0.388	0.392	0.42	0.344		84.25	0.199	0.231	0.248	0.272	0.54	0.487	0.371	0.394	0.341	0.338	0.331	0.379	0.388	0.392	0.404	0.412	0.399	0.544	0.466
84.5	0.48	0.494	0.49	0.533	0.629	0.628	0.592	0.755	0.444	0.418	0.434	0.472	0.476	0.459	0.488	0.453	0.476	0.492	0.55	0.454	0.439	0.414	0.456	0.37	0.396	0.395	0.429	0.347		84.5	0.199	0.233	0.247	0.271	0.542	0.488	0.375	0.397	0.34	0.338	0.332	0.379	0.385	0.392	0.405	0.412	0.399	0.546	0.458
84.75	0.483	0.5	0.495	0.535	0.628	0.632	0.603	0.759	0.446	0.422	0.438	0.475	0.478	0.462	0.494	0.457	0.482	0.501	0.556	0.464	0.436	0.405	0.465	0.366	0.386	0.398	0.433	0.341		84.75	0.202	0.232	0.247	0.273	0.546	0.489	0.37	0.398	0.342	0.338	0.33	0.382	0.39	0.395	0.406	0.414	0.387	0.545	0.461
85	0.485	0.501	0.501	0.536	0.631	0.637	0.618	0.76	0.448	0.423	0.44	0.48	0.482	0.462	0.497	0.457	0.48	0.504	0.558	0.464	0.438	0.406	0.467	0.362	0.397	0.397	0.44	0.325		85	0.2	0.233	0.247	0.27	0.546	0.49	0.375	0.397	0.341	0.339	0.332	0.38	0.389	0.393	0.406	0.412	0.392	0.549	0.46
85.25	0.487	0.501	0.504	0.542	0.636	0.634	0.625	0.763	0.448	0.424	0.445	0.483	0.484	0.466	0.499	0.46	0.483	0.498	0.56	0.469	0.44	0.396	0.473	0.365	0.393	0.393	0.435	0.32		85.25	0.2	0.232	0.247	0.273	0.544	0.491	0.375	0.397	0.341	0.339	0.331	0.379	0.388	0.397	0.409	0.414	0.392	0.548	0.453
85.5	0.488	0.501	0.507	0.541	0.635	0.63	0.63	0.768	0.451	0.425	0.445	0.484	0.484	0.466	0.502	0.46	0.484	0.495	0.562	0.467	0.441	0.402	0.473	0.368	0.405	0.4	0.44	0.324		85.5	0.197	0.233	0.244	0.271	0.549	0.494	0.377	0.401	0.342	0.342	0.331	0.387	0.391	0.398	0.41	0.415	0.383	0.542	0.453
85.75	0.489	0.502	0.51	0.545	0.635	0.634	0.642	0.771	0.452	0.427	0.449	0.489	0.486	0.469	0.505	0.462	0.485	0.499	0.568	0.469	0.447	0.427	0.475	0.368	0.4	0.401	0.442	0.32		85.75	0.201	0.236	0.244	0.272	0.55	0.493	0.376	0.402	0.344	0.344	0.335	0.389	0.393	0.401	0.409	0.418	0.383	0.546	0.443
86	0.494	0.506	0.512	0.548	0.64	0.635	0.634	0.775	0.454	0.429	0.452	0.487	0.489	0.47	0.507	0.466	0.483	0.503	0.568	0.475	0.445	0.434	0.465	0.37	0.408	0.405	0.446	0.311		86	0.199	0.235	0.246	0.276	0.552	0.497	0.378	0.402	0.345	0.343	0.336	0.387	0.394	0.402	0.412	0.418	0.382	0.525	0.44
86.25	0.495	0.508	0.513	0.55	0.643	0.635	0.633	0.778	0.457	0.431	0.452	0.491	0.492	0.471	0.507	0.466	0.485	0.506	0.566	0.473	0.453	0.421	0.465	0.375	0.401	0.397	0.448	0.316		86.25	0.202	0.231	0.248	0.273	0.552	0.495	0.379	0.405	0.345	0.345	0.338	0.391	0.392	0.398	0.414	0.42	0.377	0.529	0.448
86.5	0.496	0.508	0.511	0.553	0.647	0.638	0.627	0.779	0.46	0.432	0.453	0.492	0.494	0.472	0.509	0.468	0.486	0.51	0.571	0.48	0.449	0.426	0.474	0.371	0.414	0.4	0.449	0.321		86.5	0.201	0.232	0.245	0.277	0.551	0.497	0.38	0.406	0.347	0.346	0.338	0.396	0.395	0.403	0.414	0.42	0.378	0.531	0.446
86.75	0.498	0.511	0.512	0.554	0.65	0.641	0.625	0.782	0.459	0.435	0.454	0.492	0.496	0.475	0.51	0.469	0.484	0.514	0.575	0.468	0.44	0.424	0.473	0.376	0.404	0.399	0.452	0.325		86.75	0.201	0.234	0.249	0.275	0.551	0.497	0.38	0.405	0.348	0.345	0.34	0.395	0.395	0.402	0.415	0.422	0.362	0.522	0.443
87	0.5	0.514	0.512	0.557	0.651	0.643	0.626	0.786	0.462	0.435	0.455	0.494	0.498	0.478	0.511	0.473	0.484	0.515	0.576	0.478	0.443	0.418	0.476	0.381	0.391	0.409	0.448	0.332		87	0.199	0.233	0.247	0.275	0.552	0.499	0.38	0.405	0.348	0.346	0.34	0.391	0.396	0.403	0.415	0.42	0.365	0.517	0.444
87.25	0.502	0.517	0.517	0.561	0.648	0.649	0.627	0.79	0.463	0.439	0.457	0.497	0.498	0.482	0.513	0.474	0.495	0.518	0.575	0.482	0.44	0.425	0.471	0.382	0.398	0.408	0.454	0.331		87.25	0.203	0.229	0.247	0.274	0.555	0.498	0.381	0.407	0.351	0.346	0.34	0.388	0.4	0.401	0.416	0.421	0.349	0.516	0.435
87.5	0.506	0.52	0.518	0.564	0.668	0.655	0.628	0.793	0.468	0.441	0.458	0.497	0.504	0.483	0.514	0.477	0.487	0.518	0.579	0.485	0.441	0.426	0.475	0.379	0.406	0.402	0.454	0.332		87.5	0.199	0.232	0.248	0.273	0.558	0.499	0.381	0.407	0.351	0.345	0.341	0.393	0.4	0.403	0.415	0.42	0.354	0.516	0.429
87.75	0.514	0.524	0.521	0.564	0.683	0.66	0.631	0.797	0.472	0.442	0.461	0.5	0.508	0.486	0.517	0.48	0.498	0.521	0.58	0.489	0.439	0.425	0.463	0.371	0.406	0.407	0.456	0.328		87.75	0.204	0.23	0.247	0.273	0.56	0.499	0.384	0.406	0.351	0.349	0.34	0.391	0.403	0.406	0.417	0.421	0.347	0.505	0.426
88	0.515	0.527	0.52	0.569	0.681	0.66	0.633	0.798	0.474	0.444	0.461	0.501	0.509	0.488	0.519	0.482	0.496	0.526	0.582	0.488	0.439	0.43	0.473	0.38	0.415	0.419	0.461	0.33		88	0.2	0.233	0.246	0.275	0.559	0.5	0.385	0.407	0.352	0.349	0.341	0.391	0.404	0.407	0.417	0.422	0.347	0.512	0.422
88.25	0.517	0.528	0.524	0.569	0.689	0.664	0.637	0.803	0.477	0.447	0.465	0.506	0.511	0.489	0.523	0.485	0.502	0.528	0.584	0.492	0.442	0.441	0.476	0.37	0.413	0.417	0.458	0.328		88.25	0.201	0.233	0.247	0.273	0.557	0.503	0.384	0.408	0.353	0.349	0.342	0.396	0.405	0.408	0.419	0.423	0.339	0.499	0.427
88.5	0.516	0.532	0.531	0.573	0.676	0.669	0.655	0.806	0.478	0.449	0.468	0.51	0.512	0.492	0.525	0.486	0.487	0.519	0.597	0.486	0.446	0.45	0.476	0.376	0.41	0.422	0.461	0.328		88.5	0.202	0.236	0.246	0.275	0.562	0.503	0.384	0.408	0.355	0.352	0.345	0.395	0.404	0.408	0.418	0.42	0.341	0.506	0.419
88.75	0.516	0.534	0.531	0.575	0.673	0.67	0.655	0.809	0.478	0.45	0.47	0.509	0.513	0.493	0.528	0.489	0.483	0.524	0.592	0.492	0.441	0.441	0.479	0.378	0.425	0.431	0.465	0.321		88.75	0.201	0.234	0.247	0.276	0.563	0.506	0.384	0.409	0.357	0.353	0.342	0.393	0.405	0.409	0.42	0.425	0.333	0.501	0.418
89	0.516	0.534	0.537	0.577	0.677	0.671	0.66	0.811	0.479	0.452	0.474	0.513	0.515	0.496	0.53	0.491	0.486	0.523	0.594	0.493	0.454	0.447	0.478	0.373	0.419	0.433	0.463	0.322		89	0.197	0.233	0.249	0.275	0.566	0.507	0.385	0.41	0.354	0.352	0.343	0.397	0.407	0.412	0.421	0.426	0.32	0.493	0.414
89.25	0.52	0.537	0.537	0.58	0.679	0.671	0.664	0.815	0.481	0.455	0.474	0.517	0.518	0.497	0.533	0.491	0.491	0.526	0.596	0.496	0.448	0.444	0.488	0.366	0.419	0.433	0.47	0.322		89.25	0.201	0.237	0.245	0.275	0.565	0.509	0.387	0.409	0.356	0.353	0.346	0.397	0.408	0.411	0.423	0.425	0.312	0.49	0.411
89.5	0.523	0.538	0.543	0.582	0.684	0.673	0.673	0.818	0.484	0.458	0.477	0.52	0.52	0.502	0.538	0.493	0.491	0.514	0.601	0.502	0.45	0.439	0.491	0.398	0.417	0.436	0.475	0.329		89.5	0.2	0.235	0.247	0.274	0.567	0.512	0.388	0.414	0.357	0.355	0.347	0.398	0.407	0.412	0.424	0.427	0.301	0.49	0.408
89.75	0.524	0.539	0.541	0.586	0.682	0.671	0.67	0.82	0.485	0.458	0.48	0.521	0.522	0.501	0.538	0.495	0.488	0.529	0.6	0.507	0.443	0.45	0.489	0.402	0.425	0.435	0.478	0.333		89.75	0.201	0.234	0.248	0.277	0.563	0.51	0.387	0.414	0.357	0.356	0.348	0.398	0.408	0.413	0.425	0.428	0.304	0.496	0.4
90	0.528	0.541	0.545	0.588	0.684	0.673	0.673	0.824	0.487	0.459	0.481	0.523	0.523	0.503	0.541	0.496	0.491	0.521	0.603	0.495	0.45	0.443	0.491	0.398	0.413	0.433	0.477	0.331		90	0.2	0.233	0.247	0.277	0.566	0.51	0.39	0.415	0.359	0.356	0.348	0.402	0.41	0.413	0.426	0.428	0.306	0.485	0.402
90.25	0.53	0.541	0.544	0.59	0.689	0.675	0.669	0.825	0.488	0.461	0.482	0.524	0.524	0.505	0.543	0.498	0.492	0.54	0.608	0.502	0.473	0.448	0.502	0.397	0.417	0.443	0.473	0.329		90.25	0.204	0.234	0.248	0.279	0.568	0.512	0.388	0.414	0.362	0.357	0.347	0.403	0.412	0.414	0.424	0.431	0.308	0.477	0.389
90.5	0.529	0.545	0.544	0.592	0.691	0.676	0.665	0.831	0.49	0.462	0.484	0.527	0.527	0.506	0.542	0.5	0.501	0.542	0.605	0.499	0.468	0.453	0.5	0.386	0.413	0.443	0.481	0.331		90.5	0.2	0.237	0.25	0.275	0.564	0.514	0.393	0.415	0.36	0.357	0.35	0.407	0.413	0.417	0.428	0.43	0.305	0.476	0.398
90.75	0.534	0.547	0.546	0.594	0.695	0.678	0.665	0.833	0.492	0.465	0.485	0.526	0.529	0.508	0.545	0.501	0.495	0.545	0.606	0.507	0.465	0.451	0.49	0.405	0.422	0.442	0.484	0.329		90.75	0.199	0.233	0.247	0.277	0.565	0.515	0.392	0.415	0.36	0.356	0.351	0.403	0.413	0.415	0.429	0.432	0.294	0.47	0.391
91	0.535	0.547	0.547	0.597	0.696	0.682	0.666	0.836	0.495	0.466	0.489	0.528	0.531	0.511	0.545	0.504	0.49	0.547	0.612	0.505	0.457	0.45	0.496	0.409	0.421	0.449	0.484	0.337		91	0.203	0.234	0.25	0.277	0.564	0.512	0.392	0.414	0.363	0.36	0.351	0.401	0.415	0.417	0.428	0.432	0.291	0.465	0.385
91.25	0.536	0.552	0.549	0.598	0.691	0.686	0.666	0.837	0.497	0.471	0.492	0.53	0.53	0.516	0.548	0.508	0.494	0.553	0.613	0.508	0.452	0.452	0.502	0.402	0.415	0.453	0.482	0.337		91.25	0.201	0.238	0.246	0.276	0.565	0.514	0.391	0.417	0.361	0.359	0.35	0.402	0.413	0.417	0.428	0.432	0.29	0.457	0.379
91.5	0.538	0.555	0.552	0.6	0.695	0.694	0.67	0.84	0.497	0.472	0.492	0.532	0.536	0.516	0.549	0.508	0.498	0.559	0.608	0.508	0.462	0.459	0.498	0.403	0.424	0.453	0.485	0.336		91.5	0.203	0.235	0.244	0.273	0.565	0.514	0.393	0.417	0.362	0.36	0.353	0.402	0.414	0.418	0.427	0.43	0.299	0.45	0.38
91.75	0.537	0.557	0.557	0.603	0.694	0.699	0.684	0.844	0.498	0.474	0.495	0.537	0.537	0.521	0.553	0.512	0.491	0.558	0.606	0.508	0.461	0.467	0.498	0.403	0.428	0.452	0.49	0.332		91.75	0.199	0.233	0.243	0.274	0.565	0.515	0.392	0.415	0.364	0.36	0.349	0.402	0.416	0.418	0.428	0.43	0.282	0.447	0.366
92	0.545	0.559	0.559	0.606	0.716	0.705	0.685	0.847	0.503	0.476	0.497	0.54	0.541	0.523	0.555	0.514	0.507	0.564	0.611	0.505	0.466	0.465	0.498	0.405	0.429	0.455	0.487	0.323		92	0.201	0.232	0.245	0.274	0.567	0.516	0.392	0.417	0.365	0.36	0.352	0.402	0.417	0.418	0.428	0.431	0.287	0.443	0.361
92.25	0.551	0.561	0.561	0.607	0.726	0.705	0.689	0.85	0.506	0.478	0.5	0.542	0.543	0.525	0.559	0.516	0.51	0.566	0.615	0.502	0.471	0.459	0.504	0.406	0.433	0.451	0.493	0.316		92.25	0.205	0.234	0.247	0.274	0.569	0.53	0.394	0.417	0.365	0.364	0.353	0.405	0.418	0.421	0.431	0.432	0.272	0.441	0.359
92.5	0.557	0.566	0.563	0.61	0.74	0.714	0.697	0.853	0.512	0.482	0.502	0.545	0.547	0.528	0.561	0.521	0.508	0.568	0.616	0.507	0.457	0.463	0.508	0.414	0.432	0.458	0.497	0.328		92.5	0.204	0.235	0.246	0.275	0.571	0.53	0.396	0.417	0.366	0.365	0.354	0.407	0.42	0.421	0.433	0.434	0.276	0.434	0.362
92.75	0.559	0.57	0.566	0.613	0.739	0.72	0.698	0.855	0.513	0.485	0.503	0.548	0.552	0.53	0.563	0.523	0.501	0.57	0.623	0.509	0.469	0.461	0.504	0.403	0.427	0.46	0.489	0.317		92.75	0.206	0.235	0.248	0.274	0.571	0.533	0.396	0.421	0.367	0.365	0.356	0.407	0.423	0.424	0.433	0.435	0.281	0.429	0.36
93	0.554	0.566	0.569	0.613	0.73	0.707	0.702	0.858	0.512	0.483	0.507	0.55	0.55	0.529	0.567	0.524	0.502	0.57	0.628	0.513	0.468	0.461	0.518	0.408	0.422	0.464	0.497	0.323		93	0.206	0.238	0.248	0.277	0.572	0.535	0.397	0.422	0.368	0.366	0.358	0.409	0.423	0.424	0.434	0.436	0.268	0.427	0.338
93.25	0.556	0.569	0.568	0.617	0.723	0.706	0.695	0.86	0.512	0.485	0.508	0.55	0.55	0.532	0.566	0.523	0.501	0.57	0.608	0.513	0.454	0.469	0.498	0.41	0.428	0.46	0.484	0.333		93.25	0.206	0.237	0.244	0.279	0.567	0.535	0.399	0.422	0.37	0.364	0.356	0.411	0.421	0.423	0.436	0.437	0.276	0.418	0.34
93.5	0.556	0.57	0.568	0.618	0.722	0.707	0.695	0.864	0.516	0.487	0.508	0.551	0.553	0.533	0.567	0.526	0.504	0.576	0.608	0.506	0.47	0.472	0.513	0.42	0.435	0.464	0.492	0.331		93.5	0.203	0.237	0.246	0.275	0.569	0.536	0.398	0.422	0.371	0.366	0.358	0.411	0.424	0.425	0.436	0.439	0.27	0.41	0.331
93.75	0.559	0.571	0.572	0.624	0.721	0.707	0.694	0.869	0.516	0.487	0.509	0.552	0.554	0.535	0.569	0.527	0.494	0.576	0.609	0.511	0.45	0.473	0.513	0.423	0.431	0.459	0.491	0.337		93.75	0.206	0.237	0.246	0.276	0.568	0.538	0.398	0.424	0.369	0.367	0.36	0.41	0.424	0.427	0.438	0.439	0.257	0.408	0.322
94	0.559	0.572	0.575	0.624	0.726	0.71	0.697	0.869	0.518	0.488	0.512	0.555	0.558	0.538	0.572	0.528	0.505	0.578	0.612	0.514	0.463	0.475	0.515	0.421	0.429	0.467	0.477	0.336		94	0.201	0.235	0.249	0.276	0.57	0.538	0.402	0.425	0.371	0.369	0.359	0.41	0.421	0.426	0.437	0.438	0.252	0.405	0.321
94.25	0.561	0.576	0.575	0.627	0.732	0.713	0.699	0.873	0.52	0.49	0.513	0.558	0.557	0.539	0.574	0.532	0.506	0.573	0.615	0.516	0.465	0.474	0.526	0.419	0.444	0.468	0.482	0.337		94.25	0.204	0.238	0.247	0.276	0.565	0.538	0.4	0.423	0.372	0.369	0.358	0.411	0.426	0.426	0.439	0.437	0.262	0.393	0.314
94.5	0.565	0.577	0.577	0.628	0.732	0.715	0.699	0.876	0.523	0.491	0.513	0.557	0.561	0.542	0.575	0.533	0.509	0.575	0.614	0.512	0.466	0.47	0.522	0.415	0.443	0.463	0.491	0.362		94.5	0.204	0.239	0.247	0.279	0.57	0.539	0.402	0.424	0.372	0.368	0.359	0.411	0.426	0.427	0.44	0.439	0.26	0.386	0.309
94.75	0.565	0.577	0.578	0.631	0.731	0.714	0.703	0.879	0.523	0.493	0.518	0.56	0.562	0.542	0.576	0.534	0.505	0.561	0.615	0.51	0.455	0.463	0.515	0.415	0.44	0.471	0.482	0.413		94.75	0.2	0.24	0.247	0.279	0.57	0.55	0.402	0.425	0.371	0.37	0.359	0.408	0.427	0.43	0.437	0.437	0.242	0.39	0.301
95	0.568	0.583	0.58	0.633	0.729	0.729	0.702	0.881	0.525	0.496	0.518	0.563	0.563	0.547	0.577	0.541	0.506	0.576	0.616	0.52	0.46	0.473	0.506	0.423	0.448	0.478	0.477	0.406		95	0.202	0.248	0.246	0.277	0.571	0.552	0.4	0.425	0.373	0.388	0.36	0.411	0.426	0.439	0.438	0.437	0.253	0.378	0.292
95.25	0.568	0.586	0.584	0.635	0.733	0.73	0.707	0.884	0.526	0.499	0.521	0.564	0.566	0.549	0.581	0.541	0.507	0.572	0.621	0.523	0.467	0.472	0.505	0.426	0.445	0.473	0.491	0.398		95.25	0.204	0.252	0.246	0.275	0.57	0.55	0.403	0.423	0.375	0.389	0.361	0.411	0.429	0.441	0.437	0.44	0.243	0.352	0.283
95.5	0.572	0.588	0.585	0.638	0.74	0.736	0.716	0.887	0.53	0.503	0.522	0.568	0.57	0.55	0.582	0.543	0.507	0.583	0.623	0.527	0.464	0.471	0.52	0.429	0.446	0.48	0.488	0.393		95.5	0.204	0.253	0.248	0.277	0.571	0.553	0.404	0.426	0.375	0.392	0.362	0.411	0.427	0.442	0.441	0.44	0.245	0.347	0.286
95.75	0.573	0.591	0.59	0.639	0.737	0.742	0.725	0.889	0.53	0.505	0.525	0.569	0.57	0.553	0.586	0.547	0.51	0.585	0.634	0.527	0.466	0.474	0.531	0.424	0.444	0.477	0.487	0.378		95.75	0.205	0.251	0.244	0.278	0.572	0.551	0.402	0.426	0.375	0.391	0.36	0.412	0.429	0.441	0.441	0.441	0.24	0.347	0.274
96	0.577	0.594	0.592	0.642	0.746	0.748	0.728	0.893	0.532	0.507	0.53	0.573	0.574	0.556	0.588	0.546	0.514	0.582	0.635	0.532	0.464	0.484	0.546	0.435	0.441	0.486	0.494	0.36		96	0.203	0.254	0.246	0.279	0.571	0.552	0.403	0.427	0.374	0.391	0.364	0.414	0.43	0.443	0.441	0.44	0.234	0.343	0.267
96.25	0.584	0.597	0.598	0.643	0.763	0.755	0.737	0.899	0.538	0.51	0.532	0.577	0.58	0.561	0.592	0.552	0.512	0.585	0.642	0.529	0.464	0.483	0.547	0.436	0.447	0.485	0.501	0.364		96.25	0.206	0.254	0.248	0.28	0.572	0.553	0.403	0.428	0.377	0.394	0.364	0.416	0.43	0.445	0.443	0.444	0.228	0.339	0.278
96.5	0.591	0.596	0.596	0.646	0.777	0.744	0.737	0.901	0.544	0.511	0.534	0.579	0.583	0.56	0.597	0.551	0.523	0.584	0.638	0.529	0.458	0.483	0.54	0.441	0.448	0.486	0.511	0.356		96.5	0.206	0.254	0.248	0.279	0.572	0.555	0.405	0.429	0.378	0.394	0.367	0.419	0.433	0.445	0.446	0.444	0.23	0.331	0.271
96.75	0.592	0.597	0.599	0.65	0.776	0.743	0.738	0.904	0.543	0.51	0.535	0.58	0.585	0.561	0.595	0.553	0.522	0.585	0.637	0.532	0.471	0.491	0.54	0.437	0.446	0.485	0.508	0.348		96.75	0.209	0.252	0.249	0.279	0.573	0.549	0.406	0.43	0.381	0.393	0.366	0.421	0.435	0.445	0.447	0.446	0.237	0.326	0.27
97	0.592	0.596	0.597	0.652	0.781	0.74	0.729	0.905	0.547	0.512	0.534	0.579	0.586	0.561	0.598	0.552	0.515	0.589	0.647	0.526	0.475	0.489	0.534	0.435	0.456	0.488	0.51	0.351		97	0.208	0.255	0.25	0.281	0.57	0.552	0.407	0.431	0.38	0.394	0.366	0.42	0.434	0.446	0.445	0.446	0.229	0.329	0.26
97.25	0.59	0.6	0.6	0.652	0.764	0.742	0.735	0.909	0.546	0.515	0.539	0.582	0.586	0.564	0.6	0.556	0.512	0.593	0.649	0.543	0.466	0.499	0.541	0.476	0.443	0.487	0.518	0.354		97.25	0.209	0.257	0.248	0.282	0.573	0.553	0.406	0.43	0.379	0.396	0.367	0.421	0.436	0.449	0.447	0.447	0.226	0.319	0.253
97.5	0.588	0.602	0.604	0.656	0.764	0.74	0.735	0.913	0.547	0.516	0.54	0.584	0.586	0.566	0.6	0.557	0.515	0.59	0.651	0.53	0.479	0.484	0.534	0.48	0.447	0.491	0.518	0.356		97.5	0.206	0.255	0.25	0.281	0.576	0.552	0.409	0.431	0.379	0.399	0.37	0.418	0.437	0.447	0.448	0.445	0.233	0.298	0.253
97.75	0.591	0.603	0.605	0.662	0.762	0.743	0.736	0.915	0.549	0.517	0.541	0.585	0.588	0.567	0.605	0.558	0.511	0.59	0.651	0.553	0.494	0.489	0.548	0.48	0.448	0.49	0.516	0.363		97.75	0.206	0.259	0.248	0.282	0.577	0.551	0.407	0.433	0.38	0.394	0.368	0.42	0.435	0.448	0.447	0.445	0.23	0.301	0.252
98	0.591	0.605	0.606	0.66	0.762	0.744	0.738	0.916	0.549	0.519	0.544	0.589	0.589	0.57	0.604	0.561	0.515	0.593	0.654	0.557	0.491	0.499	0.549	0.484	0.453	0.494	0.524	0.364		98	0.209	0.255	0.25	0.278	0.578	0.549	0.408	0.432	0.381	0.397	0.37	0.419	0.436	0.448	0.448	0.446	0.236	0.308	0.244
98.25	0.593	0.607	0.608	0.664	0.763	0.744	0.739	0.92	0.551	0.522	0.545	0.589	0.59	0.574	0.608	0.564	0.511	0.59	0.653	0.552	0.481	0.501	0.536	0.483	0.453	0.487	0.523	0.357		98.25	0.204	0.256	0.247	0.28	0.576	0.55	0.409	0.432	0.381	0.395	0.37	0.417	0.437	0.448	0.448	0.444	0.234	0.292	0.236
98.5	0.592	0.61	0.61	0.666	0.762	0.759	0.74	0.923	0.553	0.526	0.545	0.592	0.591	0.575	0.608	0.568	0.514	0.599	0.653	0.545	0.492	0.504	0.552	0.483	0.456	0.488	0.524	0.37		98.5	0.202	0.255	0.249	0.279	0.574	0.55	0.41	0.434	0.381	0.397	0.371	0.416	0.437	0.449	0.448	0.447	0.214	0.298	0.233
98.75	0.597	0.615	0.612	0.668	0.767	0.764	0.741	0.927	0.554	0.526	0.546	0.593	0.594	0.579	0.611	0.568	0.523	0.604	0.658	0.55	0.493	0.512	0.551	0.492	0.458	0.475	0.523	0.368		98.75	0.206	0.255	0.249	0.281	0.575	0.55	0.41	0.434	0.382	0.396	0.37	0.418	0.438	0.447	0.451	0.447	0.219	0.269	0.232
99	0.599	0.619	0.615	0.67	0.768	0.77	0.753	0.929	0.555	0.529	0.552	0.596	0.597	0.581	0.616	0.571	0.519	0.606	0.661	0.559	0.498	0.516	0.553	0.489	0.455	0.482	0.528	0.371		99	0.204	0.254	0.251	0.28	0.574	0.551	0.411	0.435	0.382	0.398	0.371	0.419	0.438	0.448	0.449	0.448	0.225	0.275	0.221
99.25	0.603	0.618	0.621	0.672	0.773	0.77	0.76	0.934	0.56	0.532	0.555	0.601	0.6	0.582	0.618	0.575	0.524	0.609	0.667	0.56	0.497	0.518	0.556	0.491	0.461	0.486	0.53	0.371		99.25	0.206	0.255	0.249	0.28	0.577	0.549	0.412	0.434	0.383	0.398	0.371	0.418	0.441	0.448	0.451	0.449	0.219	0.271	0.226
99.5	0.612	0.625	0.623	0.675	0.794	0.778	0.768	0.938	0.564	0.536	0.558	0.603	0.607	0.585	0.621	0.576	0.522	0.608	0.67	0.557	0.496	0.522	0.556	0.484	0.469	0.484	0.538	0.378		99.5	0.204	0.254	0.247	0.28	0.572	0.552	0.41	0.436	0.385	0.4	0.371	0.422	0.439	0.451	0.449	0.451	0.213	0.269	0.205
99.75	0.615	0.624	0.625	0.679	0.803	0.777	0.773	0.942	0.567	0.537	0.56	0.605	0.608	0.586	0.623	0.579	0.526	0.606	0.668	0.565	0.499	0.521	0.566	0.49	0.461	0.49	0.534	0.376		99.75	0.208	0.257	0.249	0.281	0.577	0.548	0.411	0.435	0.385	0.401	0.371	0.425	0.442	0.454	0.451	0.451	0.225	0.269	0.207
100	0.62	0.625	0.629	0.681	0.812	0.774	0.776	0.943	0.571	0.538	0.561	0.609	0.611	0.587	0.626	0.578	0.525	0.61	0.675	0.564	0.508	0.53	0.574	0.484	0.469	0.482	0.544	0.377		100	0.214	0.257	0.251	0.281	0.58	0.552	0.414	0.438	0.387	0.4	0.374	0.426	0.446	0.454	0.454	0.451	0.211	0.257	0.209
100.25	0.619	0.624	0.633	0.683	0.803	0.773	0.781	0.946	0.571	0.538	0.566	0.612	0.61	0.59	0.627	0.579	0.515	0.616	0.676	0.57	0.507	0.519	0.57	0.494	0.466	0.488	0.545	0.38		100.25	0.214	0.258	0.248	0.284	0.582	0.554	0.41	0.439	0.389	0.402	0.375	0.427	0.444	0.454	0.454	0.453	0.209	0.245	0.206
100.5	0.615	0.625	0.63	0.685	0.796	0.771	0.777	0.948	0.571	0.54	0.564	0.614	0.612	0.589	0.629	0.582	0.514	0.615	0.668	0.566	0.507	0.526	0.579	0.488	0.457	0.498	0.543	0.378		100.5	0.215	0.259	0.25	0.282	0.582	0.555	0.41	0.436	0.39	0.404	0.375	0.43	0.445	0.453	0.455	0.456	0.208	0.252	0.201
100.75	0.616	0.629	0.632	0.686	0.794	0.771	0.774	0.954	0.573	0.542	0.567	0.616	0.613	0.592	0.629	0.583	0.519	0.618	0.684	0.573	0.509	0.525	0.56	0.511	0.46	0.497	0.54	0.382		100.75	0.209	0.261	0.248	0.281	0.58	0.554	0.413	0.438	0.391	0.404	0.375	0.429	0.443	0.458	0.455	0.455	0.219	0.265	0.196
101	0.618	0.628	0.63	0.691	0.793	0.77	0.771	0.955	0.574	0.541	0.567	0.615	0.613	0.595	0.632	0.586	0.515	0.616	0.68	0.581	0.508	0.53	0.576	0.506	0.461	0.49	0.544	0.38		101	0.213	0.259	0.248	0.284	0.583	0.553	0.413	0.44	0.391	0.403	0.374	0.43	0.446	0.456	0.455	0.456	0.224	0.251	0.202
101.25	0.619	0.63	0.637	0.692	0.793	0.774	0.773	0.959	0.576	0.544	0.57	0.616	0.615	0.597	0.633	0.588	0.515	0.618	0.679	0.579	0.504	0.533	0.577	0.52	0.464	0.502	0.539	0.389		101.25	0.213	0.26	0.251	0.285	0.581	0.553	0.416	0.439	0.391	0.407	0.378	0.429	0.446	0.456	0.459	0.454	0.217	0.245	0.198
101.5	0.621	0.635	0.638	0.693	0.795	0.777	0.776	0.959	0.578	0.547	0.574	0.618	0.618	0.599	0.637	0.59	0.518	0.623	0.684	0.576	0.501	0.533	0.578	0.52	0.452	0.505	0.544	0.387		101.5	0.213	0.254	0.249	0.283	0.583	0.554	0.415	0.441	0.392	0.407	0.376	0.429	0.447	0.456	0.457	0.454	0.227	0.243	0.186
101.75	0.622	0.637	0.638	0.696	0.793	0.783	0.779	0.963	0.579	0.55	0.576	0.62	0.62	0.601	0.636	0.597	0.525	0.625	0.674	0.571	0.491	0.541	0.581	0.524	0.462	0.513	0.541	0.385		101.75	0.208	0.254	0.252	0.282	0.583	0.554	0.414	0.441	0.392	0.404	0.376	0.428	0.446	0.458	0.454	0.455	0.215	0.248	0.182
102	0.625	0.638	0.64	0.698	0.798	0.789	0.776	0.967	0.581	0.553	0.576	0.623	0.622	0.604	0.639	0.599	0.53	0.623	0.677	0.586	0.511	0.542	0.581	0.517	0.47	0.506	0.549	0.385		102	0.208	0.257	0.248	0.282	0.582	0.552	0.418	0.439	0.391	0.405	0.377	0.429	0.447	0.455	0.457	0.454	0.219	0.25	0.19
102.25	0.627	0.646	0.641	0.698	0.798	0.799	0.78	0.967	0.582	0.555	0.579	0.626	0.625	0.607	0.641	0.6	0.527	0.629	0.675	0.595	0.505	0.543	0.588	0.513	0.466	0.511	0.541	0.42		102.25	0.21	0.256	0.251	0.283	0.583	0.555	0.418	0.44	0.393	0.407	0.377	0.428	0.449	0.457	0.459	0.454	0.225	0.239	0.193
102.5	0.634	0.653	0.645	0.702	0.815	0.813	0.786	0.97	0.587	0.561	0.578	0.627	0.629	0.613	0.643	0.604	0.534	0.631	0.681	0.594	0.517	0.544	0.587	0.519	0.474	0.516	0.531	0.44		102.5	0.21	0.255	0.247	0.282	0.586	0.556	0.417	0.441	0.393	0.408	0.378	0.43	0.448	0.459	0.458	0.456	0.22	0.235	0.178
102.75	0.639	0.651	0.652	0.704	0.828	0.807	0.795	0.975	0.591	0.561	0.584	0.63	0.634	0.615	0.649	0.601	0.537	0.633	0.681	0.602	0.522	0.545	0.585	0.525	0.477	0.515	0.53	0.437		102.75	0.212	0.26	0.25	0.28	0.587	0.558	0.417	0.443	0.394	0.41	0.379	0.43	0.451	0.46	0.457	0.457	0.215	0.243	0.178
103	0.644	0.649	0.653	0.708	0.84	0.797	0.799	0.978	0.594	0.562	0.587	0.632	0.636	0.615	0.651	0.602	0.543	0.626	0.689	0.613	0.527	0.537	0.582	0.519	0.485	0.507	0.544	0.462		103	0.21	0.259	0.249	0.282	0.587	0.557	0.42	0.443	0.395	0.41	0.38	0.429	0.449	0.461	0.459	0.457	0.225	0.245	0.176
103.25	0.648	0.651	0.656	0.711	0.852	0.798	0.81	0.98	0.598	0.562	0.59	0.637	0.641	0.616	0.654	0.601	0.54	0.629	0.691	0.608	0.532	0.548	0.581	0.522	0.494	0.515	0.534	0.47		103.25	0.213	0.261	0.251	0.281	0.592	0.556	0.42	0.444	0.397	0.412	0.382	0.432	0.452	0.462	0.461	0.458	0.223	0.229	0.181
103.5	0.643	0.652	0.66	0.712	0.831	0.799	0.812	0.98	0.598	0.563	0.591	0.639	0.638	0.619	0.654	0.597	0.548	0.625	0.698	0.609	0.525	0.541	0.586	0.528	0.488	0.514	0.532	0.479		103.5	0.213	0.262	0.249	0.285	0.591	0.552	0.42	0.445	0.398	0.412	0.38	0.433	0.454	0.461	0.461	0.46	0.228	0.231	0.169
103.75	0.645	0.652	0.659	0.715	0.826	0.797	0.813	0.985	0.597	0.564	0.593	0.639	0.641	0.619	0.66	0.589	0.539	0.635	0.697	0.612	0.516	0.551	0.585	0.533	0.49	0.509	0.542	0.457		103.75	0.214	0.264	0.249	0.286	0.586	0.559	0.424	0.447	0.398	0.414	0.382	0.434	0.454	0.464	0.458	0.461	0.228	0.223	0.175
104	0.645	0.655	0.66	0.716	0.825	0.797	0.808	0.987	0.599	0.567	0.592	0.64	0.639	0.62	0.658	0.582	0.536	0.64	0.696	0.613	0.529	0.542	0.597	0.525	0.493	0.509	0.543	0.45		104	0.21	0.262	0.251	0.285	0.589	0.559	0.422	0.449	0.399	0.413	0.382	0.439	0.454	0.465	0.46	0.461	0.238	0.235	0.178
104.25	0.644	0.656	0.663	0.719	0.82	0.799	0.805	0.99	0.601	0.569	0.594	0.643	0.64	0.623	0.661	0.571	0.538	0.642	0.704	0.611	0.534	0.551	0.604	0.53	0.482	0.516	0.54	0.442		104.25	0.21	0.259	0.251	0.287	0.59	0.559	0.425	0.45	0.401	0.411	0.383	0.437	0.453	0.464	0.462	0.463	0.253	0.222	0.169
104.5	0.646	0.659	0.659	0.718	0.823	0.802	0.807	0.993	0.601	0.571	0.595	0.643	0.644	0.625	0.657	0.565	0.538	0.633	0.715	0.607	0.53	0.555	0.6	0.537	0.492	0.517	0.538	0.441		104.5	0.213	0.26	0.252	0.283	0.591	0.562	0.426	0.449	0.402	0.415	0.384	0.435	0.455	0.464	0.465	0.462	0.247	0.205	0.162
104.75	0.647	0.662	0.666	0.723	0.824	0.805	0.809	0.996	0.605	0.573	0.6	0.645	0.646	0.626	0.663	0.57	0.535	0.637	0.718	0.611	0.534	0.558	0.605	0.534	0.494	0.52	0.536	0.47		104.75	0.211	0.259	0.253	0.286	0.592	0.559	0.425	0.448	0.399	0.414	0.384	0.436	0.454	0.464	0.464	0.461	0.268	0.194	0.159
105	0.649	0.669	0.667	0.725	0.827	0.824	0.81	0.997	0.606	0.575	0.602	0.648	0.646	0.632	0.666	0.568	0.544	0.651	0.722	0.618	0.535	0.559	0.595	0.54	0.489	0.528	0.541	0.464		105	0.211	0.262	0.253	0.285	0.589	0.559	0.425	0.448	0.402	0.414	0.386	0.436	0.456	0.464	0.462	0.462	0.249	0.192	0.157
105.25	0.651	0.673	0.668	0.728	0.83	0.831	0.815	1.002	0.608	0.582	0.605	0.648	0.65	0.634	0.667	0.561	0.536	0.654	0.73	0.613	0.533	0.573	0.603	0.535	0.484	0.525	0.537	0.476		105.25	0.21	0.26	0.25	0.284	0.591	0.558	0.425	0.449	0.4	0.414	0.385	0.437	0.455	0.464	0.464	0.462	0.261	0.187	0.166
105.5	0.656	0.678	0.673	0.731	0.831	0.847	0.814	1.006	0.61	0.586	0.605	0.651	0.652	0.638	0.669	0.548	0.541	0.651	0.731	0.609	0.53	0.588	0.595	0.538	0.487	0.53	0.543	0.468		105.5	0.21	0.261	0.25	0.285	0.595	0.561	0.425	0.449	0.4	0.417	0.386	0.433	0.456	0.465	0.465	0.462	0.26	0.195	0.168
105.75	0.659	0.677	0.675	0.734	0.838	0.843	0.815	1.009	0.612	0.587	0.606	0.651	0.657	0.641	0.672	0.559	0.545	0.651	0.732	0.61	0.533	0.577	0.613	0.557	0.497	0.533	0.556	0.467		105.75	0.209	0.26	0.25	0.287	0.596	0.558	0.427	0.45	0.401	0.415	0.385	0.437	0.455	0.465	0.463	0.463	0.269	0.198	0.181
106	0.671	0.679	0.677	0.736	0.859	0.837	0.816	1.011	0.619	0.587	0.606	0.655	0.661	0.641	0.674	0.573	0.55	0.656	0.738	0.612	0.54	0.588	0.611	0.545	0.493	0.53	0.557	0.459		106	0.213	0.257	0.249	0.284	0.598	0.561	0.429	0.449	0.403	0.417	0.387	0.44	0.458	0.466	0.464	0.462	0.273	0.199	0.185
106.25	0.672	0.677	0.682	0.737	0.865	0.834	0.834	1.014	0.622	0.589	0.612	0.659	0.662	0.641	0.678	0.573	0.548	0.653	0.739	0.617	0.548	0.581	0.614	0.557	0.492	0.539	0.565	0.475		106.25	0.213	0.259	0.25	0.283	0.6	0.562	0.429	0.446	0.403	0.418	0.387	0.439	0.459	0.47	0.464	0.464	0.275	0.193	0.192
106.5	0.677	0.679	0.686	0.739	0.871	0.831	0.839	1.017	0.624	0.59	0.614	0.662	0.664	0.642	0.681	0.567	0.556	0.655	0.743	0.618	0.542	0.578	0.611	0.547	0.496	0.537	0.567	0.472		106.5	0.212	0.264	0.251	0.285	0.6	0.563	0.427	0.446	0.405	0.419	0.387	0.437	0.46	0.468	0.463	0.465	0.274	0.197	0.19
106.75	0.677	0.682	0.689	0.748	0.864	0.836	0.848	1.02	0.623	0.59	0.618	0.665	0.666	0.645	0.683	0.577	0.556	0.658	0.747	0.612	0.538	0.579	0.605	0.556	0.495	0.534	0.571	0.479		106.75	0.217	0.264	0.248	0.285	0.604	0.563	0.425	0.445	0.407	0.421	0.387	0.44	0.461	0.468	0.465	0.466	0.276	0.2	0.188
107	0.676	0.684	0.69	0.75	0.858	0.839	0.847	1.021	0.625	0.593	0.621	0.669	0.667	0.647	0.686	0.581	0.55	0.655	0.747	0.608	0.545	0.58	0.607	0.561	0.497	0.537	0.574	0.481		107	0.215	0.264	0.25	0.285	0.601	0.565	0.428	0.45	0.409	0.422	0.388	0.444	0.462	0.47	0.468	0.468	0.276	0.205	0.19
107.25	0.675	0.684	0.694	0.752	0.855	0.838	0.853	1.024	0.624	0.594	0.623	0.669	0.669	0.649	0.689	0.584	0.545	0.666	0.752	0.613	0.543	0.582	0.609	0.557	0.496	0.533	0.575	0.477		107.25	0.213	0.264	0.253	0.286	0.603	0.563	0.427	0.452	0.408	0.421	0.389	0.447	0.464	0.47	0.47	0.468	0.277	0.205	0.189
107.5	0.679	0.686	0.691	0.755	0.862	0.838	0.844	1.026	0.628	0.594	0.624	0.671	0.669	0.648	0.687	0.576	0.546	0.666	0.747	0.619	0.547	0.578	0.615	0.546	0.495	0.535	0.576	0.476		107.5	0.214	0.264	0.253	0.286	0.606	0.564	0.43	0.453	0.408	0.421	0.392	0.445	0.463	0.472	0.468	0.469	0.27	0.189	0.193
107.75	0.682	0.686	0.691	0.76	0.863	0.839	0.842	1.03	0.628	0.597	0.624	0.671	0.674	0.652	0.689	0.591	0.546	0.659	0.755	0.624	0.542	0.574	0.618	0.561	0.491	0.538	0.577	0.476		107.75	0.213	0.262	0.254	0.285	0.607	0.563	0.43	0.453	0.409	0.422	0.393	0.446	0.465	0.471	0.47	0.47	0.287	0.197	0.204
108	0.683	0.69	0.696	0.761	0.863	0.842	0.848	1.035	0.634	0.6	0.629	0.675	0.674	0.655	0.692	0.593	0.538	0.666	0.748	0.62	0.542	0.581	0.623	0.561	0.498	0.533	0.572	0.467		108	0.212	0.262	0.251	0.287	0.605	0.565	0.43	0.457	0.409	0.422	0.391	0.445	0.464	0.469	0.467	0.469	0.271	0.181	0.202
108.25	0.685	0.691	0.696	0.763	0.866	0.841	0.851	1.035	0.635	0.601	0.631	0.675	0.678	0.657	0.695	0.596	0.54	0.674	0.749	0.62	0.533	0.594	0.626	0.554	0.504	0.533	0.564	0.494		108.25	0.209	0.264	0.251	0.287	0.605	0.563	0.433	0.457	0.409	0.423	0.393	0.446	0.462	0.471	0.468	0.469	0.262	0.191	0.206
108.5	0.686	0.691	0.697	0.766	0.868	0.844	0.85	1.04	0.635	0.604	0.631	0.677	0.679	0.659	0.696	0.596	0.546	0.669	0.747	0.621	0.546	0.594	0.626	0.575	0.505	0.53	0.576	0.494		108.5	0.217	0.261	0.254	0.284	0.606	0.563	0.432	0.457	0.41	0.424	0.394	0.446	0.464	0.472	0.47	0.469	0.257	0.182	0.208
108.75	0.688	0.696	0.701	0.766	0.871	0.847	0.854	1.041	0.638	0.607	0.635	0.681	0.68	0.661	0.7	0.601	0.548	0.676	0.746	0.627	0.548	0.596	0.629	0.573	0.496	0.538	0.574	0.483		108.75	0.211	0.261	0.252	0.282	0.609	0.565	0.431	0.457	0.411	0.424	0.394	0.441	0.464	0.472	0.471	0.466	0.262	0.19	0.204
109	0.69	0.702	0.702	0.77	0.875	0.865	0.854	1.046	0.639	0.61	0.637	0.684	0.683	0.665	0.701	0.605	0.55	0.675	0.755	0.629	0.553	0.608	0.635	0.575	0.497	0.544	0.583	0.479		109	0.214	0.263	0.252	0.289	0.607	0.561	0.434	0.458	0.411	0.426	0.394	0.446	0.465	0.472	0.471	0.471	0.264	0.184	0.206
109.25	0.693	0.704	0.704	0.769	0.873	0.869	0.857	1.051	0.642	0.611	0.638	0.685	0.684	0.667	0.703	0.604	0.554	0.675	0.751	0.622	0.554	0.599	0.635	0.551	0.507	0.543	0.571	0.485		109.25	0.213	0.263	0.254	0.288	0.608	0.565	0.433	0.461	0.413	0.425	0.393	0.448	0.469	0.469	0.469	0.469	0.274	0.18	0.196
109.5	0.694	0.709	0.707	0.776	0.875	0.876	0.857	1.053	0.643	0.615	0.639	0.685	0.687	0.67	0.704	0.607	0.542	0.675	0.751	0.635	0.556	0.596	0.628	0.572	0.51	0.551	0.571	0.488		109.5	0.212	0.261	0.249	0.287	0.61	0.567	0.432	0.46	0.412	0.426	0.394	0.446	0.467	0.472	0.469	0.469	0.274	0.186	0.206
109.75	0.694	0.709	0.709	0.78	0.876	0.875	0.863	1.054	0.647	0.616	0.642	0.69	0.69	0.671	0.708	0.614	0.547	0.685	0.753	0.633	0.553	0.605	0.644	0.571	0.51	0.55	0.584	0.484		109.75	0.212	0.26	0.251	0.287	0.61	0.567	0.431	0.461	0.414	0.428	0.394	0.449	0.468	0.472	0.471	0.472	0.274	0.178	0.205
110	0.696	0.71	0.709	0.782	0.875	0.865	0.861	1.056	0.649	0.616	0.642	0.69	0.69	0.67	0.71	0.614	0.556	0.674	0.764	0.635	0.542	0.597	0.642	0.58	0.502	0.538	0.584	0.486		110	0.213	0.267	0.25	0.287	0.611	0.57	0.431	0.463	0.415	0.43	0.396	0.448	0.469	0.475	0.47	0.471	0.262	0.184	0.201
110.25	0.704	0.71	0.713	0.785	0.893	0.864	0.862	1.059	0.651	0.617	0.646	0.691	0.695	0.673	0.711	0.623	0.56	0.679	0.767	0.644	0.549	0.594	0.633	0.577	0.52	0.544	0.589	0.501		110.25	0.215	0.262	0.253	0.285	0.614	0.57	0.432	0.462	0.413	0.432	0.394	0.448	0.47	0.475	0.471	0.471	0.254	0.19	0.206
110.5	0.709	0.716	0.716	0.787	0.905	0.866	0.869	1.058	0.655	0.621	0.646	0.697	0.699	0.674	0.713	0.627	0.562	0.682	0.758	0.64	0.56	0.611	0.641	0.575	0.534	0.542	0.578	0.49		110.5	0.215	0.266	0.25	0.285	0.615	0.571	0.43	0.464	0.418	0.433	0.396	0.45	0.469	0.48	0.472	0.473	0.267	0.197	0.195
110.75	0.717	0.716	0.717	0.788	0.916	0.87	0.868	1.063	0.658	0.622	0.649	0.697	0.703	0.677	0.714	0.621	0.564	0.681	0.753	0.641	0.562	0.61	0.641	0.582	0.529	0.547	0.577	0.513		110.75	0.214	0.267	0.253	0.285	0.614	0.573	0.43	0.465	0.419	0.433	0.399	0.45	0.472	0.477	0.472	0.472	0.279	0.191	0.189
111	0.718	0.718	0.719	0.792	0.916	0.865	0.871	1.066	0.661	0.624	0.653	0.699	0.705	0.681	0.718	0.629	0.569	0.677	0.759	0.643	0.564	0.608	0.639	0.588	0.515	0.551	0.58	0.501		111	0.219	0.266	0.251	0.287	0.618	0.573	0.433	0.464	0.421	0.435	0.398	0.45	0.472	0.478	0.472	0.471	0.282	0.192	0.198
111.25	0.714	0.721	0.722	0.795	0.905	0.87	0.878	1.068	0.66	0.627	0.655	0.705	0.703	0.683	0.72	0.634	0.569	0.677	0.764	0.658	0.573	0.608	0.634	0.581	0.534	0.549	0.582	0.489		111.25	0.216	0.265	0.252	0.286	0.62	0.574	0.432	0.468	0.422	0.434	0.397	0.451	0.474	0.48	0.471	0.473	0.285	0.19	0.187
111.5	0.712	0.721	0.723	0.795	0.9	0.87	0.887	1.071	0.661	0.628	0.658	0.707	0.705	0.686	0.724	0.637	0.564	0.679	0.766	0.656	0.572	0.607	0.652	0.575	0.536	0.549	0.591	0.506		111.5	0.217	0.263	0.251	0.288	0.621	0.574	0.432	0.464	0.424	0.434	0.399	0.452	0.478	0.479	0.474	0.474	0.27	0.187	0.194
111.75	0.712	0.726	0.732	0.799	0.9	0.871	0.899	1.075	0.66	0.632	0.663	0.712	0.707	0.689	0.728	0.643	0.563	0.68	0.771	0.672	0.564	0.62	0.654	0.581	0.537	0.557	0.601	0.515		111.75	0.216	0.264	0.252	0.29	0.619	0.574	0.436	0.468	0.421	0.435	0.4	0.454	0.475	0.48	0.475	0.476	0.272	0.185	0.185
112	0.719	0.725	0.735	0.801	0.904	0.871	0.904	1.078	0.665	0.632	0.662	0.713	0.706	0.688	0.733	0.64	0.573	0.685	0.766	0.674	0.567	0.611	0.662	0.588	0.538	0.564	0.598	0.503		112	0.215	0.265	0.253	0.287	0.62	0.574	0.437	0.47	0.423	0.436	0.402	0.457	0.475	0.48	0.477	0.476	0.278	0.198	0.196
112.25	0.719	0.727	0.734	0.803	0.907	0.874	0.901	1.078	0.667	0.635	0.665	0.714	0.709	0.692	0.734	0.648	0.57	0.688	0.792	0.674	0.564	0.619	0.659	0.583	0.541	0.563	0.595	0.535		112.25	0.213	0.263	0.254	0.29	0.621	0.575	0.435	0.464	0.423	0.436	0.401	0.455	0.475	0.48	0.477	0.475	0.279	0.19	0.184
112.5	0.72	0.729	0.733	0.806	0.905	0.871	0.893	1.082	0.668	0.636	0.665	0.717	0.712	0.693	0.734	0.646	0.573	0.688	0.801	0.676	0.567	0.615	0.647	0.598	0.535	0.565	0.588	0.541		112.5	0.213	0.266	0.253	0.288	0.62	0.574	0.436	0.468	0.421	0.437	0.405	0.458	0.475	0.482	0.476	0.479	0.278	0.173	0.188
112.75	0.724	0.733	0.734	0.805	0.907	0.874	0.892	1.083	0.669	0.637	0.669	0.717	0.715	0.7	0.734	0.648	0.573	0.692	0.807	0.674	0.57	0.608	0.648	0.593	0.531	0.565	0.588	0.53		112.75	0.214	0.264	0.255	0.289	0.62	0.579	0.439	0.469	0.424	0.436	0.404	0.463	0.477	0.482	0.477	0.481	0.296	0.181	0.188
113	0.724	0.739	0.736	0.808	0.907	0.894	0.892	1.085	0.672	0.639	0.67	0.716	0.716	0.705	0.736	0.656	0.579	0.698	0.802	0.668	0.572	0.619	0.658	0.586	0.529	0.573	0.596	0.536		113	0.214	0.266	0.254	0.291	0.623	0.577	0.437	0.47	0.424	0.437	0.404	0.459	0.476	0.483	0.477	0.478	0.279	0.174	0.195
113.25	0.726	0.742	0.736	0.81	0.911	0.899	0.896	1.089	0.675	0.646	0.672	0.719	0.718	0.708	0.74	0.667	0.58	0.691	0.808	0.675	0.569	0.625	0.661	0.592	0.53	0.568	0.593	0.525		113.25	0.211	0.267	0.255	0.289	0.624	0.577	0.437	0.47	0.422	0.44	0.406	0.457	0.473	0.485	0.481	0.479	0.292	0.184	0.189
113.5	0.729	0.74	0.738	0.812	0.914	0.908	0.897	1.089	0.678	0.647	0.674	0.722	0.721	0.713	0.741	0.667	0.581	0.706	0.813	0.666	0.568	0.625	0.649	0.591	0.55	0.571	0.593	0.536		113.5	0.213	0.262	0.252	0.289	0.623	0.577	0.436	0.468	0.425	0.44	0.407	0.457	0.476	0.482	0.479	0.477	0.288	0.18	0.181
113.75	0.728	0.744	0.742	0.81	0.913	0.903	0.9	1.092	0.676	0.649	0.676	0.725	0.725	0.714	0.743	0.67	0.587	0.71	0.811	0.67	0.578	0.624	0.659	0.586	0.551	0.572	0.598	0.531		113.75	0.214	0.268	0.252	0.287	0.626	0.577	0.436	0.47	0.426	0.44	0.405	0.46	0.477	0.485	0.477	0.479	0.284	0.184	0.183
114	0.732	0.741	0.744	0.817	0.916	0.892	0.902	1.094	0.679	0.646	0.678	0.735	0.726	0.711	0.743	0.673	0.589	0.694	0.807	0.672	0.581	0.624	0.67	0.593	0.551	0.569	0.596	0.546		114	0.215	0.268	0.253	0.288	0.623	0.579	0.436	0.471	0.427	0.441	0.405	0.459	0.478	0.484	0.478	0.48	0.283	0.182	0.181
114.25	0.733	0.741	0.746	0.82	0.913	0.892	0.904	1.096	0.68	0.65	0.679	0.739	0.727	0.714	0.746	0.68	0.587	0.713	0.802	0.669	0.577	0.623	0.671	0.583	0.554	0.574	0.598	0.553		114.25	0.213	0.269	0.253	0.289	0.626	0.579	0.439	0.466	0.429	0.444	0.406	0.462	0.479	0.486	0.478	0.478	0.286	0.179	0.176
114.5	0.74	0.744	0.749	0.82	0.931	0.888	0.905	1.098	0.686	0.651	0.682	0.739	0.73	0.71	0.75	0.677	0.594	0.714	0.795	0.664	0.592	0.633	0.672	0.58	0.557	0.572	0.597	0.537		114.5	0.215	0.27	0.255	0.288	0.63	0.579	0.438	0.468	0.429	0.443	0.406	0.461	0.481	0.487	0.477	0.479	0.281	0.182	0.183
114.75	0.744	0.744	0.75	0.817	0.941	0.891	0.909	1.098	0.69	0.653	0.683	0.743	0.733	0.715	0.746	0.682	0.601	0.718	0.789	0.665	0.59	0.626	0.673	0.58	0.554	0.577	0.597	0.548		114.75	0.217	0.271	0.252	0.29	0.632	0.582	0.44	0.47	0.43	0.445	0.408	0.46	0.483	0.491	0.481	0.48	0.294	0.184	0.173
115	0.745	0.745	0.752	0.822	0.947	0.889	0.909	1.101	0.691	0.656	0.685	0.743	0.737	0.716	0.753	0.688	0.601	0.724	0.787	0.666	0.61	0.631	0.682	0.586	0.593	0.578	0.594	0.54		115	0.218	0.268	0.254	0.29	0.632	0.58	0.438	0.472	0.432	0.445	0.408	0.462	0.482	0.489	0.482	0.479	0.291	0.187	0.169
115.25	0.749	0.748	0.753	0.826	0.96	0.892	0.911	1.105	0.694	0.657	0.688	0.748	0.742	0.719	0.756	0.691	0.598	0.725	0.785	0.671	0.622	0.633	0.683	0.602	0.597	0.571	0.595	0.562		115.25	0.214	0.266	0.251	0.288	0.637	0.579	0.438	0.472	0.431	0.444	0.407	0.46	0.484	0.488	0.481	0.479	0.284	0.196	0.167
115.5	0.752	0.752	0.754	0.823	0.963	0.894	0.909	1.105	0.695	0.659	0.688	0.747	0.743	0.722	0.757	0.7	0.601	0.731	0.789	0.67	0.609	0.642	0.682	0.59	0.601	0.568	0.61	0.564		115.5	0.216	0.265	0.253	0.288	0.637	0.578	0.439	0.47	0.431	0.446	0.408	0.463	0.484	0.489	0.481	0.479	0.285	0.194	0.165
115.75	0.748	0.753	0.758	0.828	0.946	0.894	0.919	1.109	0.695	0.66	0.688	0.752	0.741	0.723	0.759	0.704	0.586	0.725	0.801	0.67	0.614	0.639	0.688	0.589	0.598	0.568	0.617	0.561		115.75	0.217	0.266	0.254	0.289	0.638	0.579	0.438	0.473	0.434	0.445	0.409	0.462	0.485	0.49	0.482	0.482	0.28	0.191	0.166
116	0.749	0.758	0.76	0.83	0.942	0.905	0.926	1.112	0.697	0.663	0.695	0.756	0.742	0.727	0.764	0.712	0.594	0.731	0.802	0.676	0.617	0.654	0.694	0.594	0.601	0.571	0.622	0.555		116	0.213	0.272	0.255	0.287	0.637	0.579	0.438	0.473	0.433	0.448	0.409	0.464	0.483	0.49	0.482	0.479	0.276	0.19	0.179
116.25	0.75	0.762	0.762	0.828	0.943	0.916	0.938	1.112	0.698	0.666	0.698	0.758	0.743	0.73	0.766	0.713	0.599	0.721	0.81	0.662	0.62	0.654	0.703	0.609	0.596	0.587	0.626	0.56		116.25	0.213	0.269	0.249	0.287	0.637	0.579	0.439	0.475	0.433	0.446	0.411	0.466	0.482	0.489	0.481	0.482	0.284	0.187	0.184
116.5	0.753	0.768	0.769	0.832	0.947	0.927	0.945	1.111	0.702	0.673	0.702	0.757	0.746	0.734	0.771	0.722	0.59	0.721	0.81	0.726	0.62	0.648	0.704	0.602	0.588	0.584	0.635	0.562		116.5	0.212	0.269	0.255	0.289	0.639	0.579	0.441	0.476	0.434	0.45	0.41	0.466	0.483	0.49	0.485	0.482	0.28	0.196	0.187
116.75	0.752	0.77	0.772	0.832	0.943	0.928	0.946	1.116	0.7	0.674	0.703	0.764	0.747	0.73	0.773	0.725	0.598	0.715	0.802	0.742	0.624	0.649	0.695	0.606	0.595	0.585	0.63	0.557		116.75	0.216	0.267	0.252	0.292	0.641	0.583	0.441	0.478	0.433	0.448	0.413	0.467	0.484	0.49	0.484	0.485	0.28	0.197	0.178
117	0.753	0.768	0.772	0.835	0.947	0.92	0.941	1.12	0.702	0.674	0.705	0.765	0.749	0.738	0.773	0.725	0.602	0.72	0.793	0.746	0.618	0.643	0.712	0.607	0.594	0.57	0.636	0.569		117	0.214	0.268	0.258	0.29	0.641	0.582	0.441	0.477	0.436	0.452	0.413	0.469	0.487	0.493	0.486	0.486	0.287	0.199	0.178
117.25	0.758	0.768	0.771	0.835	0.947	0.917	0.934	1.12	0.705	0.676	0.705	0.765	0.751	0.739	0.771	0.724	0.604	0.722	0.806	0.748	0.614	0.651	0.699	0.599	0.601	0.583	0.636	0.573		117.25	0.214	0.272	0.254	0.292	0.639	0.585	0.439	0.476	0.439	0.453	0.415	0.473	0.485	0.495	0.487	0.487	0.281	0.203	0.174
117.5	0.758	0.767	0.772	0.839	0.95	0.911	0.936	1.126	0.705	0.669	0.707	0.766	0.753	0.738	0.775	0.726	0.601	0.722	0.807	0.749	0.627	0.649	0.703	0.616	0.598	0.613	0.632	0.579		117.5	0.215	0.27	0.257	0.295	0.644	0.583	0.443	0.481	0.437	0.453	0.416	0.475	0.483	0.494	0.488	0.486	0.282	0.202	0.179
117.75	0.761	0.769	0.773	0.838	0.951	0.913	0.933	1.126	0.709	0.673	0.708	0.769	0.754	0.741	0.778	0.733	0.604	0.721	0.811	0.768	0.623	0.66	0.701	0.604	0.583	0.601	0.633	0.568		117.75	0.212	0.273	0.255	0.291	0.64	0.58	0.443	0.476	0.437	0.453	0.416	0.473	0.486	0.495	0.488	0.486	0.282	0.201	0.18
118	0.762	0.772	0.775	0.843	0.954	0.916	0.934	1.13	0.709	0.676	0.708	0.771	0.755	0.743	0.778	0.732	0.6	0.719	0.812	0.75	0.626	0.655	0.704	0.613	0.599	0.615	0.635	0.566		118	0.216	0.275	0.258	0.289	0.642	0.586	0.438	0.476	0.44	0.455	0.417	0.47	0.486	0.497	0.491	0.482	0.278	0.202	0.17
118.25	0.764	0.774	0.774	0.845	0.952	0.919	0.937	1.132	0.713	0.685	0.711	0.771	0.755	0.744	0.78	0.732	0.602	0.717	0.812	0.755	0.631	0.663	0.709	0.595	0.587	0.617	0.635	0.572		118.25	0.213	0.271	0.254	0.29	0.645	0.585	0.435	0.476	0.438	0.457	0.418	0.471	0.487	0.497	0.491	0.488	0.281	0.213	0.178
118.5	0.765	0.775	0.776	0.847	0.954	0.921	0.938	1.132	0.715	0.685	0.714	0.773	0.758	0.747	0.774	0.735	0.598	0.724	0.812	0.75	0.622	0.657	0.709	0.604	0.591	0.611	0.635	0.587		118.5	0.216	0.271	0.254	0.289	0.645	0.587	0.436	0.477	0.44	0.455	0.417	0.472	0.486	0.494	0.488	0.483	0.283	0.213	0.155
118.75	0.771	0.779	0.779	0.848	0.971	0.925	0.939	1.134	0.721	0.687	0.717	0.776	0.763	0.749	0.778	0.737	0.599	0.721	0.809	0.759	0.634	0.681	0.706	0.603	0.602	0.621	0.636	0.581		118.75	0.216	0.27	0.256	0.291	0.643	0.585	0.436	0.479	0.443	0.453	0.416	0.472	0.488	0.495	0.49	0.486	0.286	0.212	0.155
119	0.78	0.78	0.781	0.852	0.986	0.921	0.941	1.136	0.725	0.69	0.718	0.779	0.769	0.747	0.779	0.735	0.599	0.737	0.817	0.765	0.643	0.676	0.698	0.616	0.593	0.626	0.63	0.578		119	0.214	0.265	0.253	0.292	0.644	0.582	0.435	0.48	0.443	0.454	0.418	0.473	0.488	0.493	0.489	0.484	0.29	0.222	0.145
119.25	0.78	0.781	0.782	0.854	0.993	0.926	0.942	1.136	0.726	0.688	0.718	0.779	0.772	0.751	0.783	0.741	0.615	0.747	0.816	0.766	0.645	0.684	0.704	0.617	0.606	0.627	0.649	0.585		119.25	0.215	0.272	0.253	0.289	0.65	0.585	0.435	0.477	0.443	0.456	0.417	0.471	0.49	0.5	0.488	0.484	0.293	0.221	0.148
119.5	0.783	0.781	0.789	0.855	0.993	0.923	0.956	1.14	0.728	0.691	0.722	0.786	0.774	0.751	0.785	0.738	0.609	0.753	0.827	0.762	0.645	0.681	0.721	0.615	0.605	0.626	0.647	0.58		119.5	0.215	0.273	0.253	0.291	0.648	0.584	0.435	0.477	0.443	0.455	0.419	0.471	0.49	0.497	0.49	0.484	0.304	0.223	0.141
119.75	0.782	0.788	0.795	0.858	0.995	0.937	0.978	1.144	0.731	0.695	0.727	0.793	0.775	0.755	0.793	0.745	0.605	0.764	0.826	0.772	0.645	0.69	0.718	0.626	0.607	0.615	0.652	0.588		119.75	0.217	0.269	0.255	0.289	0.651	0.578	0.437	0.478	0.443	0.457	0.42	0.474	0.494	0.498	0.491	0.484	0.295	0.216	0.141
120	0.777	0.791	0.8	0.858	0.98	0.947	0.982	1.146	0.73	0.697	0.731	0.794	0.773	0.76	0.792	0.746	0.61	0.772	0.825	0.775	0.644	0.696	0.723	0.619	0.593	0.624	0.655	0.585		120	0.218	0.269	0.256	0.291	0.65	0.58	0.437	0.483	0.447	0.457	0.419	0.477	0.492	0.497	0.494	0.485	0.286	0.212	0.146
120.25	0.78	0.794	0.8	0.864	0.982	0.954	0.98	1.15	0.731	0.702	0.731	0.795	0.776	0.761	0.795	0.751	0.607	0.768	0.823	0.762	0.636	0.703	0.719	0.62	0.602	0.652	0.652	0.586		120.25	0.215	0.27	0.255	0.292	0.651	0.58	0.439	0.48	0.448	0.458	0.42	0.479	0.493	0.497	0.495	0.491	0.296	0.215	0.147
120.5	0.779	0.8	0.797	0.867	0.979	0.96	0.97	1.152	0.731	0.703	0.731	0.795	0.777	0.765	0.795	0.754	0.609	0.763	0.832	0.767	0.644	0.69	0.725	0.619	0.593	0.65	0.655	0.587		120.5	0.218	0.27	0.257	0.296	0.651	0.582	0.437	0.481	0.445	0.456	0.423	0.48	0.493	0.499	0.492	0.489	0.289	0.214	0.167
120.75	0.781	0.796	0.798	0.871	0.982	0.947	0.968	1.152	0.734	0.704	0.733	0.797	0.778	0.765	0.794	0.755	0.613	0.762	0.824	0.779	0.64	0.693	0.718	0.628	0.603	0.645	0.659	0.591		120.75	0.215	0.271	0.257	0.293	0.651	0.577	0.436	0.48	0.447	0.458	0.426	0.482	0.495	0.498	0.496	0.493	0.297	0.227	0.169
121	0.785	0.794	0.799	0.873	0.982	0.941	0.967	1.154	0.734	0.707	0.733	0.799	0.782	0.764	0.798	0.751	0.618	0.767	0.827	0.771	0.633	0.698	0.737	0.63	0.592	0.643	0.647	0.587		121	0.218	0.271	0.258	0.291	0.655	0.578	0.438	0.482	0.445	0.461	0.425	0.481	0.494	0.5	0.496	0.49	0.303	0.232	0.179
121.25	0.787	0.797	0.801	0.872	0.979	0.938	0.975	1.154	0.737	0.705	0.737	0.802	0.785	0.766	0.799	0.756	0.618	0.768	0.824	0.777	0.649	0.688	0.728	0.612	0.603	0.652	0.651	0.607		121.25	0.214	0.274	0.256	0.292	0.65	0.579	0.437	0.481	0.448	0.461	0.426	0.48	0.492	0.504	0.495	0.49	0.306	0.246	0.186
121.5	0.788	0.798	0.802	0.876	0.98	0.936	0.976	1.156	0.739	0.706	0.739	0.803	0.787	0.77	0.804	0.756	0.616	0.773	0.815	0.783	0.652	0.695	0.736	0.625	0.605	0.647	0.64	0.602		121.5	0.212	0.276	0.256	0.29	0.649	0.583	0.436	0.482	0.446	0.463	0.425	0.479	0.492	0.502	0.493	0.488	0.303	0.244	0.183
121.75	0.796	0.798	0.799	0.88	0.999	0.937	0.975	1.16	0.744	0.708	0.74	0.804	0.792	0.766	0.806	0.754	0.616	0.773	0.816	0.786	0.658	0.684	0.739	0.633	0.604	0.641	0.644	0.622		121.75	0.214	0.272	0.256	0.292	0.655	0.585	0.44	0.483	0.45	0.463	0.426	0.478	0.495	0.504	0.497	0.49	0.308	0.252	0.188
122	0.801	0.799	0.801	0.882	1.014	0.938	0.975	1.162	0.746	0.71	0.742	0.804	0.795	0.77	0.808	0.756	0.624	0.759	0.818	0.783	0.665	0.694	0.734	0.645	0.603	0.643	0.629	0.627		122	0.217	0.275	0.257	0.289	0.653	0.583	0.44	0.485	0.45	0.464	0.424	0.479	0.497	0.504	0.497	0.49	0.308	0.254	0.187
122.25	0.802	0.8	0.8	0.883	1.018	0.937	0.978	1.166	0.752	0.711	0.742	0.806	0.798	0.771	0.808	0.761	0.625	0.756	0.822	0.796	0.664	0.692	0.731	0.64	0.607	0.647	0.64	0.627		122.25	0.216	0.274	0.253	0.293	0.654	0.584	0.441	0.484	0.452	0.467	0.423	0.48	0.497	0.503	0.495	0.489	0.311	0.251	0.171
122.5	0.81	0.804	0.806	0.884	1.034	0.937	0.983	1.169	0.756	0.712	0.745	0.81	0.803	0.773	0.815	0.761	0.619	0.756	0.825	0.799	0.666	0.686	0.742	0.644	0.613	0.651	0.637	0.638		122.5	0.219	0.274	0.255	0.291	0.655	0.587	0.442	0.485	0.455	0.465	0.426	0.48	0.5	0.505	0.497	0.491	0.319	0.255	0.182
122.75	0.802	0.798	0.808	0.885	1.015	0.937	0.985	1.166	0.756	0.715	0.744	0.814	0.801	0.775	0.817	0.766	0.627	0.766	0.843	0.788	0.66	0.7	0.737	0.635	0.611	0.65	0.64	0.642		122.75	0.218	0.271	0.255	0.29	0.655	0.587	0.444	0.485	0.453	0.465	0.427	0.479	0.498	0.504	0.498	0.488	0.315	0.267	0.182
123	0.802	0.803	0.809	0.889	1.011	0.946	0.985	1.173	0.753	0.717	0.748	0.814	0.804	0.779	0.82	0.766	0.629	0.771	0.832	0.788	0.662	0.703	0.742	0.64	0.611	0.657	0.642	0.63		123	0.214	0.273	0.256	0.29	0.655	0.587	0.443	0.487	0.455	0.467	0.428	0.484	0.498	0.505	0.497	0.491	0.322	0.267	0.191
123.25	0.805	0.811	0.806	0.887	1.008	0.96	0.98	1.171	0.756	0.72	0.748	0.815	0.803	0.785	0.82	0.77	0.624	0.765	0.825	0.791	0.659	0.712	0.737	0.635	0.604	0.66	0.643	0.636		123.25	0.216	0.274	0.254	0.291	0.649	0.585	0.44	0.487	0.452	0.466	0.427	0.483	0.498	0.505	0.496	0.491	0.331	0.279	0.188
123.5	0.803	0.813	0.818	0.892	1	0.965	1.005	1.175	0.756	0.724	0.755	0.822	0.804	0.787	0.825	0.775	0.627	0.773	0.839	0.793	0.662	0.707	0.751	0.647	0.611	0.664	0.648	0.628		123.5	0.219	0.275	0.257	0.292	0.652	0.585	0.443	0.485	0.455	0.468	0.43	0.485	0.499	0.506	0.496	0.493	0.326	0.272	0.188
123.75	0.805	0.818	0.822	0.892	1.005	0.974	1.008	1.177	0.758	0.726	0.757	0.824	0.807	0.789	0.829	0.778	0.621	0.781	0.828	0.801	0.664	0.712	0.738	0.649	0.62	0.672	0.674	0.609		123.75	0.217	0.273	0.258	0.291	0.653	0.583	0.447	0.485	0.454	0.467	0.43	0.482	0.503	0.508	0.499	0.489	0.324	0.272	0.192
124	0.806	0.814	0.824	0.895	1.006	0.961	1.011	1.179	0.761	0.727	0.76	0.826	0.809	0.786	0.829	0.775	0.623	0.778	0.842	0.792	0.654	0.712	0.754	0.661	0.628	0.663	0.669	0.608		124	0.218	0.275	0.255	0.291	0.655	0.59	0.444	0.484	0.454	0.47	0.431	0.485	0.498	0.509	0.5	0.493	0.319	0.287	0.193
124.25	0.809	0.814	0.826	0.896	1.009	0.96	1.018	1.182	0.763	0.724	0.762	0.826	0.808	0.789	0.832	0.778	0.733	0.784	0.839	0.804	0.672	0.713	0.757	0.657	0.628	0.664	0.664	0.626		124.25	0.216	0.273	0.255	0.294	0.654	0.594	0.445	0.483	0.457	0.471	0.435	0.49	0.501	0.509	0.501	0.495	0.32	0.286	0.198
124.5	0.812	0.816	0.83	0.899	1.012	0.958	1.023	1.182	0.764	0.724	0.764	0.83	0.813	0.79	0.837	0.778	0.733	0.777	0.834	0.826	0.678	0.718	0.758	0.662	0.623	0.661	0.668	0.644		124.5	0.214	0.274	0.256	0.294	0.655	0.592	0.445	0.486	0.455	0.471	0.433	0.488	0.502	0.51	0.503	0.495	0.32	0.289	0.201
124.75	0.819	0.815	0.826	0.902	1.024	0.955	1.009	1.182	0.768	0.729	0.763	0.828	0.816	0.793	0.833	0.777	0.731	0.792	0.835	0.822	0.688	0.71	0.747	0.664	0.625	0.663	0.662	0.619		124.75	0.217	0.275	0.259	0.296	0.654	0.594	0.446	0.488	0.454	0.472	0.434	0.492	0.502	0.512	0.505	0.495	0.322	0.284	0.212
125	0.824	0.819	0.827	0.904	1.041	0.958	1.006	1.188	0.772	0.732	0.764	0.828	0.82	0.793	0.832	0.78	0.738	0.776	0.828	0.824	0.687	0.712	0.762	0.655	0.633	0.663	0.665	0.63		125	0.215	0.28	0.259	0.296	0.654	0.594	0.446	0.49	0.455	0.473	0.435	0.494	0.503	0.515	0.506	0.497	0.323	0.302	0.22
125.25	0.827	0.817	0.831	0.905	1.05	0.955	1.008	1.193	0.777	0.733	0.757	0.831	0.823	0.795	0.837	0.778	0.735	0.784	0.835	0.826	0.694	0.718	0.758	0.659	0.636	0.667	0.669	0.628		125.25	0.216	0.276	0.259	0.296	0.655	0.593	0.447	0.49	0.457	0.474	0.435	0.493	0.505	0.514	0.503	0.496	0.326	0.301	0.212
125.5	0.827	0.821	0.834	0.909	1.048	0.958	1.012	1.193	0.775	0.734	0.764	0.836	0.82	0.795	0.838	0.78	0.722	0.779	0.839	0.827	0.692	0.718	0.767	0.657	0.635	0.666	0.677	0.63		125.5	0.216	0.275	0.258	0.297	0.655	0.592	0.445	0.488	0.457	0.472	0.436	0.49	0.506	0.512	0.503	0.496	0.318	0.294	0.218
125.75	0.824	0.83	0.837	0.911	1.034	0.956	1.012	1.193	0.773	0.734	0.765	0.836	0.826	0.799	0.841	0.781	0.721	0.786	0.834	0.836	0.683	0.714	0.772	0.658	0.628	0.664	0.672	0.635		125.75	0.219	0.276	0.258	0.293	0.656	0.592	0.447	0.487	0.46	0.476	0.437	0.491	0.507	0.514	0.504	0.493	0.335	0.308	0.214
126	0.822	0.83	0.839	0.914	1.03	0.954	1.014	1.2	0.775	0.738	0.766	0.84	0.828	0.8	0.843	0.781	0.717	0.779	0.838	0.829	0.679	0.714	0.761	0.651	0.623	0.673	0.683	0.63		126	0.216	0.275	0.257	0.293	0.657	0.594	0.447	0.486	0.459	0.474	0.435	0.491	0.503	0.514	0.503	0.496	0.331	0.309	0.207
126.25	0.824	0.834	0.841	0.914	1.026	0.963	1.015	1.197	0.778	0.739	0.766	0.84	0.828	0.794	0.843	0.778	0.724	0.781	0.834	0.833	0.686	0.727	0.765	0.683	0.62	0.678	0.695	0.633		126.25	0.216	0.273	0.255	0.293	0.657	0.593	0.442	0.487	0.461	0.474	0.436	0.49	0.505	0.514	0.502	0.497	0.331	0.308	0.224
126.5	0.827	0.841	0.843	0.917	1.026	0.98	1.02	1.204	0.78	0.745	0.77	0.844	0.83	0.805	0.847	0.794	0.719	0.79	0.831	0.838	0.688	0.739	0.763	0.674	0.63	0.672	0.693	0.638		126.5	0.218	0.276	0.258	0.293	0.658	0.59	0.445	0.488	0.463	0.474	0.435	0.492	0.509	0.514	0.504	0.496	0.327	0.307	0.215
126.75	0.821	0.847	0.845	0.918	1.032	0.992	1.02	1.2	0.783	0.748	0.771	0.844	0.83	0.812	0.849	0.792	0.722	0.784	0.826	0.841	0.687	0.736	0.76	0.683	0.634	0.685	0.681	0.64		126.75	0.216	0.275	0.257	0.294	0.659	0.591	0.442	0.487	0.461	0.475	0.435	0.489	0.506	0.516	0.504	0.494	0.331	0.315	0.212
127	0.833	0.849	0.839	0.92	1.03	0.992	1.021	1.202	0.783	0.751	0.771	0.848	0.834	0.813	0.848	0.8	0.729	0.794	0.889	0.843	0.685	0.737	0.778	0.679	0.623	0.68	0.676	0.644		127	0.215	0.273	0.258	0.292	0.657	0.597	0.442	0.489	0.461	0.475	0.437	0.493	0.507	0.515	0.504	0.495	0.332	0.318	0.204
127.25	0.834	0.849	0.844	0.923	1.026	0.986	1.018	1.202	0.785	0.751	0.771	0.849	0.835	0.814	0.852	0.798	0.721	0.787	0.887	0.843	0.685	0.735	0.77	0.678	0.63	0.674	0.678	0.653		127.25	0.219	0.274	0.253	0.294	0.659	0.597	0.445	0.487	0.462	0.476	0.44	0.493	0.507	0.516	0.504	0.499	0.336	0.321	0.213
127.5	0.836	0.846	0.849	0.922	1.03	0.979	1.023	1.207	0.787	0.751	0.778	0.849	0.836	0.814	0.854	0.799	0.718	0.795	0.892	0.851	0.69	0.742	0.774	0.679	0.631	0.67	0.684	0.663		127.5	0.215	0.275	0.257	0.296	0.658	0.597	0.444	0.488	0.463	0.477	0.441	0.495	0.507	0.517	0.507	0.496	0.338	0.323	0.216
127.75	0.844	0.845	0.848	0.928	1.048	0.978	1.023	1.209	0.792	0.751	0.777	0.847	0.842	0.815	0.857	0.796	0.731	0.798	0.885	0.853	0.695	0.747	0.771	0.683	0.637	0.667	0.666	0.639		127.75	0.216	0.276	0.256	0.294	0.662	0.596	0.442	0.487	0.465	0.481	0.439	0.493	0.511	0.52	0.505	0.496	0.34	0.327	0.219
128	0.851	0.847	0.849	0.929	1.061	0.98	1.018	1.211	0.795	0.753	0.78	0.846	0.844	0.817	0.858	0.799	0.741	0.797	0.885	0.855	0.701	0.755	0.779	0.683	0.643	0.676	0.667	0.635		128	0.217	0.279	0.256	0.294	0.665	0.601	0.441	0.485	0.465	0.48	0.441	0.495	0.512	0.522	0.506	0.499	0.34	0.334	0.226
128.25	0.853	0.848	0.855	0.933	1.066	0.983	1.035	1.214	0.796	0.755	0.781	0.851	0.847	0.819	0.86	0.801	0.738	0.791	0.887	0.856	0.697	0.75	0.785	0.693	0.636	0.675	0.666	0.647		128.25	0.218	0.276	0.257	0.295	0.667	0.598	0.444	0.488	0.468	0.483	0.439	0.497	0.512	0.522	0.507	0.499	0.347	0.335	0.226
128.5	0.858	0.845	0.859	0.933	1.078	0.982	1.038	1.214	0.802	0.757	0.785	0.856	0.853	0.82	0.864	0.802	0.735	0.805	0.891	0.855	0.699	0.739	0.779	0.687	0.638	0.681	0.652	0.633		128.5	0.217	0.28	0.258	0.295	0.668	0.594	0.445	0.487	0.468	0.48	0.439	0.494	0.516	0.523	0.508	0.498	0.343	0.332	0.227
128.75	0.853	0.846	0.858	0.936	1.056	0.986	1.045	1.218	0.802	0.76	0.789	0.858	0.85	0.82	0.868	0.804	0.728	0.803	0.889	0.865	0.698	0.749	0.782	0.693	0.63	0.685	0.65	0.644		128.75	0.219	0.275	0.255	0.296	0.669	0.592	0.444	0.487	0.468	0.481	0.441	0.497	0.513	0.521	0.51	0.499	0.345	0.329	0.23
129	0.852	0.85	0.862	0.939	1.053	0.985	1.048	1.221	0.801	0.76	0.791	0.86	0.85	0.823	0.869	0.8	0.741	0.799	0.889	0.862	0.695	0.752	0.793	0.691	0.639	0.693	0.64	0.644		129	0.22	0.278	0.258	0.295	0.668	0.596	0.444	0.487	0.469	0.485	0.443	0.499	0.517	0.522	0.509	0.501	0.353	0.341	0.23
129.25	0.849	0.85	0.865	0.938	1.05	0.979	1.056	1.221	0.804	0.759	0.795	0.863	0.85	0.824	0.871	0.805	0.739	0.794	0.89	0.869	0.695	0.748	0.791	0.686	0.633	0.688	0.629	0.64		129.25	0.218	0.277	0.257	0.295	0.665	0.595	0.444	0.489	0.468	0.484	0.445	0.5	0.514	0.526	0.514	0.502	0.35	0.34	0.231
129.5	0.854	0.855	0.864	0.942	1.056	0.987	1.053	1.223	0.805	0.764	0.795	0.863	0.853	0.827	0.872	0.807	0.745	0.792	0.886	0.87	0.699	0.762	0.795	0.68	0.638	0.689	0.666	0.648		129.5	0.218	0.276	0.256	0.295	0.671	0.597	0.445	0.489	0.468	0.484	0.445	0.504	0.516	0.523	0.514	0.504	0.35	0.345	0.226
129.75	0.857	0.854	0.861	0.943	1.059	0.987	1.04	1.226	0.809	0.764	0.796	0.862	0.855	0.826	0.867	0.807	0.761	0.821	0.89	0.87	0.71	0.759	0.793	0.702	0.638	0.693	0.674	0.637		129.75	0.216	0.279	0.259	0.297	0.667	0.602	0.447	0.489	0.471	0.485	0.449	0.504	0.519	0.526	0.516	0.505	0.354	0.354	0.238
130	0.858	0.857	0.865	0.947	1.054	0.99	1.041	1.226	0.811	0.768	0.797	0.865	0.855	0.831	0.871	0.807	0.783	0.815	0.894	0.877	0.715	0.763	0.786	0.693	0.635	0.698	0.664	0.652		130	0.217	0.277	0.258	0.296	0.671	0.599	0.448	0.491	0.47	0.482	0.449	0.506	0.519	0.524	0.515	0.504	0.353	0.349	0.229
130.25	0.857	0.858	0.866	0.948	1.058	0.989	1.045	1.228	0.814	0.767	0.798	0.865	0.858	0.832	0.875	0.806	0.784	0.817	0.887	0.877	0.72	0.759	0.805	0.713	0.638	0.698	0.684	0.649		130.25	0.217	0.274	0.257	0.294	0.672	0.598	0.441	0.49	0.472	0.485	0.448	0.504	0.519	0.524	0.514	0.503	0.363	0.352	0.236
130.5	0.86	0.864	0.87	0.95	1.061	0.996	1.05	1.233	0.814	0.769	0.8	0.866	0.864	0.834	0.877	0.812	0.773	0.82	0.889	0.882	0.718	0.771	0.803	0.704	0.638	0.685	0.676	0.647		130.5	0.215	0.277	0.255	0.298	0.673	0.602	0.443	0.488	0.47	0.485	0.446	0.506	0.519	0.527	0.514	0.504	0.367	0.356	0.227
130.75	0.858	0.871	0.87	0.951	1.064	1.012	1.053	1.235	0.817	0.774	0.803	0.87	0.867	0.839	0.879	0.815	0.776	0.827	0.89	0.886	0.715	0.761	0.801	0.709	0.637	0.698	0.688	0.653		130.75	0.218	0.278	0.256	0.297	0.678	0.596	0.448	0.488	0.473	0.486	0.448	0.504	0.518	0.528	0.517	0.506	0.372	0.356	0.241
131	0.861	0.872	0.874	0.953	1.063	1.018	1.053	1.241	0.82	0.777	0.804	0.871	0.867	0.844	0.881	0.815	0.768	0.817	0.881	0.886	0.712	0.773	0.806	0.717	0.644	0.694	0.676	0.662		131	0.214	0.274	0.257	0.299	0.675	0.604	0.445	0.489	0.474	0.487	0.448	0.505	0.521	0.53	0.515	0.506	0.369	0.366	0.233
131.25	0.863	0.875	0.875	0.953	1.061	1.024	1.054	1.243	0.82	0.779	0.808	0.875	0.869	0.845	0.883	0.822	0.765	0.819	0.908	0.888	0.712	0.785	0.816	0.717	0.648	0.673	0.679	0.677		131.25	0.217	0.278	0.258	0.296	0.677	0.604	0.448	0.488	0.474	0.489	0.449	0.505	0.521	0.531	0.519	0.503	0.376	0.357	0.231
131.5	0.871	0.875	0.875	0.959	1.076	1.012	1.059	1.243	0.821	0.78	0.809	0.877	0.874	0.845	0.887	0.821	0.764	0.828	0.913	0.892	0.719	0.769	0.805	0.719	0.651	0.658	0.688	0.676		131.5	0.215	0.278	0.26	0.296	0.68	0.608	0.444	0.49	0.475	0.491	0.449	0.502	0.522	0.533	0.517	0.506	0.38	0.369	0.236
131.75	0.876	0.873	0.879	0.959	1.092	1.009	1.056	1.246	0.826	0.78	0.812	0.877	0.878	0.845	0.889	0.819	0.781	0.825	0.914	0.896	0.723	0.776	0.804	0.72	0.652	0.655	0.681	0.676		131.75	0.219	0.277	0.259	0.299	0.681	0.608	0.444	0.491	0.474	0.491	0.446	0.506	0.521	0.535	0.516	0.505	0.37	0.376	0.229
132	0.881	0.874	0.879	0.964	1.094	1.008	1.054	1.248	0.829	0.772	0.815	0.878	0.881	0.847	0.89	0.824	0.781	0.824	0.911	0.902	0.719	0.766	0.799	0.722	0.652	0.645	0.667	0.684		132	0.218	0.282	0.256	0.299	0.685	0.608	0.444	0.49	0.477	0.494	0.449	0.505	0.522	0.536	0.515	0.505	0.371	0.364	0.229
132.25	0.885	0.876	0.882	0.963	1.111	1.012	1.059	1.248	0.833	0.777	0.816	0.882	0.883	0.848	0.891	0.82	0.778	0.827	0.911	0.902	0.728	0.784	0.807	0.719	0.65	0.645	0.675	0.671		132.25	0.218	0.282	0.256	0.297	0.686	0.607	0.446	0.491	0.476	0.494	0.449	0.504	0.522	0.537	0.517	0.505	0.385	0.37	0.232
132.5	0.877	0.878	0.883	0.967	1.087	1.009	1.059	1.253	0.831	0.776	0.817	0.882	0.875	0.851	0.894	0.826	0.778	0.829	0.91	0.904	0.724	0.785	0.812	0.721	0.649	0.641	0.679	0.681		132.5	0.219	0.283	0.259	0.298	0.684	0.611	0.442	0.492	0.479	0.493	0.451	0.506	0.527	0.539	0.515	0.506	0.377	0.375	0.235
132.75	0.879	0.881	0.886	0.969	1.083	1.009	1.064	1.256	0.829	0.786	0.824	0.886	0.878	0.846	0.897	0.828	0.783	0.826	0.908	0.906	0.727	0.786	0.818	0.727	0.656	0.62	0.685	0.679		132.75	0.219	0.278	0.256	0.296	0.684	0.607	0.445	0.488	0.479	0.496	0.449	0.505	0.527	0.538	0.521	0.508	0.384	0.375	0.234
133	0.881	0.878	0.888	0.969	1.082	1.009	1.063	1.256	0.832	0.787	0.822	0.887	0.878	0.847	0.897	0.831	0.785	0.833	0.904	0.904	0.724	0.789	0.825	0.729	0.654	0.611	0.687	0.691		133	0.219	0.281	0.257	0.294	0.684	0.609	0.443	0.487	0.478	0.497	0.451	0.507	0.528	0.537	0.52	0.507	0.379	0.375	0.234
133.25	0.884	0.883	0.887	0.967	1.083	1.012	1.068	1.259	0.835	0.786	0.826	0.89	0.882	0.849	0.899	0.834	0.783	0.829	0.902	0.907	0.724	0.787	0.821	0.733	0.657	0.629	0.688	0.695		133.25	0.217	0.28	0.256	0.296	0.684	0.612	0.447	0.492	0.478	0.494	0.454	0.506	0.526	0.538	0.52	0.508	0.378	0.382	0.232
133.5	0.883	0.886	0.895	0.972	1.085	1.014	1.082	1.261	0.837	0.792	0.83	0.894	0.883	0.853	0.904	0.839	0.782	0.837	0.908	0.91	0.731	0.788	0.819	0.739	0.652	0.61	0.681	0.678		133.5	0.217	0.28	0.26	0.297	0.687	0.611	0.448	0.488	0.482	0.496	0.454	0.509	0.528	0.539	0.52	0.51	0.384	0.392	0.239
133.75	0.889	0.888	0.899	0.973	1.087	1.017	1.087	1.264	0.84	0.794	0.833	0.896	0.882	0.857	0.905	0.834	0.778	0.837	0.907	0.912	0.722	0.793	0.818	0.736	0.65	0.62	0.691	0.682		133.75	0.217	0.28	0.26	0.297	0.685	0.613	0.445	0.49	0.481	0.498	0.457	0.51	0.53	0.54	0.524	0.51	0.388	0.392	0.243
134	0.888	0.883	0.903	0.969	1.09	1.014	1.099	1.261	0.842	0.794	0.83	0.9	0.887	0.854	0.907	0.839	0.779	0.841	0.904	0.913	0.727	0.795	0.816	0.731	0.649	0.625	0.685	0.683		134	0.218	0.28	0.259	0.297	0.688	0.614	0.448	0.49	0.483	0.498	0.456	0.514	0.531	0.54	0.522	0.511	0.384	0.388	0.241
134.25	0.892	0.886	0.904	0.976	1.089	1.015	1.099	1.264	0.843	0.794	0.834	0.904	0.891	0.855	0.912	0.838	0.784	0.848	0.903	0.92	0.724	0.793	0.82	0.738	0.66	0.612	0.685	0.694		134.25	0.216	0.283	0.257	0.302	0.684	0.615	0.447	0.491	0.483	0.499	0.455	0.512	0.53	0.542	0.525	0.511	0.393	0.389	0.24
134.5	0.891	0.892	0.902	0.978	1.087	1.021	1.094	1.267	0.846	0.798	0.834	0.904	0.892	0.86	0.912	0.84	0.783	0.851	0.902	0.92	0.72	0.795	0.825	0.737	0.653	0.63	0.681	0.69		134.5	0.215	0.279	0.261	0.301	0.688	0.618	0.447	0.494	0.484	0.5	0.457	0.516	0.531	0.544	0.524	0.514	0.403	0.394	0.249
134.75	0.893	0.893	0.902	0.979	1.092	1.023	1.087	1.269	0.847	0.801	0.834	0.905	0.896	0.86	0.91	0.842	0.788	0.851	0.907	0.922	0.715	0.794	0.821	0.737	0.652	0.632	0.69	0.694		134.75	0.219	0.28	0.261	0.302	0.694	0.62	0.449	0.494	0.485	0.499	0.458	0.517	0.532	0.545	0.523	0.513	0.412	0.386	0.244
135	0.895	0.894	0.899	0.982	1.09	1.021	1.087	1.269	0.847	0.8	0.837	0.905	0.89	0.863	0.911	0.844	0.791	0.868	0.904	0.925	0.728	0.79	0.829	0.742	0.662	0.64	0.681	0.688		135	0.216	0.279	0.258	0.303	0.693	0.621	0.446	0.491	0.486	0.499	0.46	0.517	0.529	0.546	0.526	0.515	0.403	0.397	0.244
135.25	0.902	0.902	0.904	0.984	1.103	1.04	1.089	1.272	0.85	0.806	0.838	0.909	0.897	0.867	0.917	0.847	0.795	0.872	0.904	0.933	0.731	0.801	0.836	0.746	0.662	0.64	0.698	0.711		135.25	0.213	0.28	0.261	0.3	0.689	0.622	0.447	0.494	0.483	0.503	0.461	0.517	0.532	0.546	0.526	0.513	0.398	0.394	0.244
135.5	0.903	0.903	0.905	0.987	1.112	1.043	1.089	1.275	0.855	0.807	0.838	0.91	0.898	0.869	0.918	0.845	0.794	0.879	0.9	0.933	0.734	0.798	0.836	0.736	0.664	0.643	0.699	0.707		135.5	0.217	0.283	0.26	0.301	0.691	0.625	0.445	0.492	0.489	0.503	0.46	0.517	0.535	0.548	0.528	0.516	0.4	0.401	0.252
135.75	0.911	0.909	0.905	0.987	1.128	1.053	1.089	1.277	0.859	0.81	0.84	0.912	0.905	0.875	0.919	0.852	0.814	0.88	0.901	0.933	0.738	0.808	0.83	0.743	0.67	0.643	0.702	0.708		135.75	0.216	0.279	0.261	0.298	0.696	0.626	0.45	0.491	0.485	0.501	0.46	0.515	0.535	0.548	0.528	0.515	0.402	0.405	0.25
136	0.913	0.914	0.908	0.99	1.13	1.061	1.094	1.277	0.863	0.814	0.843	0.912	0.909	0.876	0.921	0.853	0.811	0.881	0.898	0.935	0.742	0.806	0.843	0.751	0.671	0.645	0.702	0.692		136	0.218	0.282	0.26	0.3	0.704	0.628	0.447	0.491	0.489	0.504	0.461	0.516	0.536	0.547	0.529	0.512	0.404	0.402	0.251
136.25	0.908	0.913	0.91	0.993	1.112	1.058	1.09	1.283	0.86	0.816	0.846	0.915	0.906	0.88	0.923	0.853	0.804	0.883	0.9	0.928	0.737	0.798	0.84	0.747	0.668	0.64	0.709	0.706		136.25	0.22	0.28	0.259	0.297	0.702	0.629	0.446	0.491	0.49	0.504	0.462	0.515	0.539	0.55	0.528	0.514	0.404	0.407	0.253
136.5	0.907	0.907	0.91	0.994	1.112	1.041	1.094	1.283	0.861	0.814	0.846	0.916	0.909	0.877	0.923	0.852	0.819	0.872	0.945	0.934	0.731	0.807	0.84	0.747	0.667	0.671	0.699	0.71		136.5	0.218	0.282	0.256	0.297	0.703	0.633	0.445	0.489	0.49	0.505	0.46	0.516	0.534	0.551	0.526	0.515	0.408	0.415	0.256
136.75	0.911	0.909	0.911	0.997	1.112	1.041	1.09	1.283	0.863	0.814	0.847	0.917	0.912	0.877	0.927	0.859	0.817	0.877	0.951	0.939	0.733	0.805	0.844	0.759	0.662	0.664	0.705	0.704		136.75	0.219	0.284	0.26	0.299	0.707	0.635	0.447	0.489	0.49	0.507	0.461	0.515	0.537	0.552	0.529	0.515	0.407	0.412	0.259
137	0.913	0.911	0.915	0.999	1.112	1.041	1.096	1.289	0.864	0.817	0.851	0.921	0.912	0.878	0.928	0.852	0.818	0.88	0.961	0.936	0.738	0.815	0.841	0.758	0.668	0.67	0.712	0.715		137	0.216	0.282	0.259	0.298	0.709	0.635	0.446	0.489	0.492	0.508	0.464	0.516	0.54	0.554	0.529	0.517	0.413	0.408	0.264
137.25	0.914	0.911	0.916	1	1.112	1.04	1.101	1.289	0.864	0.82	0.852	0.923	0.915	0.88	0.93	0.859	0.816	0.874	0.961	0.939	0.735	0.806	0.846	0.759	0.662	0.672	0.715	0.699		137.25	0.219	0.285	0.258	0.299	0.71	0.633	0.443	0.49	0.493	0.51	0.464	0.517	0.538	0.558	0.529	0.513	0.405	0.407	0.263
137.5	0.914	0.915	0.919	1.002	1.111	1.043	1.098	1.289	0.864	0.819	0.855	0.922	0.915	0.883	0.93	0.863	0.82	0.876	0.968	0.938	0.737	0.806	0.851	0.763	0.665	0.676	0.709	0.71		137.5	0.217	0.284	0.261	0.299	0.71	0.642	0.445	0.493	0.494	0.509	0.463	0.519	0.537	0.556	0.534	0.517	0.417	0.417	0.261
137.75	0.919	0.916	0.92	1.006	1.116	1.046	1.101	1.289	0.87	0.822	0.854	0.924	0.918	0.886	0.933	0.862	0.816	0.879	0.964	0.941	0.739	0.812	0.843	0.755	0.666	0.688	0.712	0.702		137.75	0.216	0.282	0.258	0.3	0.71	0.641	0.447	0.491	0.493	0.511	0.468	0.519	0.537	0.559	0.532	0.517	0.421	0.41	0.266
138	0.915	0.92	0.919	1.007	1.116	1.045	1.098	1.294	0.87	0.823	0.859	0.928	0.918	0.887	0.934	0.862	0.824	0.875	0.968	0.935	0.742	0.811	0.849	0.76	0.668	0.679	0.715	0.695		138	0.214	0.283	0.26	0.298	0.711	0.644	0.446	0.489	0.491	0.512	0.464	0.52	0.538	0.558	0.531	0.517	0.417	0.416	0.264
138.25	0.922	0.92	0.922	1.007	1.112	1.046	1.101	1.3	0.874	0.82	0.862	0.93	0.921	0.888	0.938	0.862	0.824	0.873	0.963	0.945	0.741	0.818	0.853	0.763	0.669	0.691	0.704	0.706		138.25	0.216	0.279	0.262	0.3	0.711	0.641	0.444	0.493	0.493	0.51	0.466	0.519	0.54	0.555	0.532	0.519	0.415	0.416	0.271
138.5	0.922	0.92	0.923	1.012	1.114	1.043	1.101	1.3	0.869	0.825	0.864	0.933	0.921	0.889	0.939	0.861	0.811	0.872	0.978	0.938	0.743	0.818	0.855	0.76	0.666	0.688	0.71	0.723		138.5	0.215	0.281	0.258	0.302	0.713	0.641	0.447	0.491	0.494	0.511	0.466	0.519	0.541	0.556	0.532	0.516	0.412	0.415	0.263
138.75	0.925	0.922	0.926	1.012	1.114	1.048	1.109	1.297	0.872	0.828	0.864	0.935	0.924	0.892	0.942	0.859	0.811	0.868	0.974	0.948	0.742	0.813	0.857	0.763	0.67	0.674	0.721	0.723		138.75	0.214	0.282	0.259	0.3	0.716	0.644	0.445	0.491	0.494	0.511	0.467	0.522	0.541	0.557	0.53	0.52	0.42	0.424	0.266
139	0.925	0.921	0.929	1.018	1.116	1.041	1.112	1.303	0.876	0.827	0.867	0.937	0.928	0.892	0.945	0.865	0.822	0.903	0.971	0.936	0.742	0.812	0.864	0.758	0.671	0.684	0.723	0.716		139	0.219	0.279	0.262	0.299	0.719	0.646	0.442	0.493	0.497	0.512	0.467	0.519	0.546	0.558	0.53	0.517	0.431	0.43	0.265
139.25	0.926	0.926	0.934	1.016	1.114	1.051	1.128	1.306	0.878	0.832	0.871	0.943	0.928	0.89	0.944	0.869	0.821	0.913	0.972	0.938	0.703	0.81	0.868	0.775	0.633	0.684	0.725	0.726		139.25	0.213	0.28	0.261	0.304	0.722	0.643	0.445	0.491	0.497	0.514	0.468	0.522	0.542	0.559	0.533	0.521	0.421	0.42	0.266
139.5	0.931	0.928	0.937	1.021	1.136	1.05	1.13	1.303	0.886	0.832	0.874	0.943	0.932	0.896	0.948	0.875	0.815	0.909	0.975	0.945	0.71	0.818	0.869	0.76	0.643	0.681	0.713	0.714		139.5	0.217	0.283	0.26	0.302	0.722	0.649	0.446	0.492	0.494	0.515	0.469	0.527	0.544	0.564	0.536	0.52	0.417	0.423	0.263
139.75	0.937	0.932	0.938		1.138	1.05	1.134		0.883	0.833	0.877	0.945	0.933	0.898	0.952	0.872	0.831	0.907	0.98	0.952	0.706	0.823	0.879	0.756	0.643	0.679	0.716	0.718		139.75	0.217	0.284	0.259	0.304	0.724	0.653	0.444	0.496	0.499	0.515	0.471	0.528	0.546	0.565	0.538	0.523	0.419	0.425	0.277
140	0.942	0.939	0.941		1.152	1.064	1.138		0.892	0.836	0.878	0.951	0.939	0.905	0.956	0.876	0.828	0.907	0.98	0.95	0.712	0.82	0.883	0.767	0.657	0.679	0.72	0.727		140	0.218	0.282	0.258	0.301	0.727	0.659	0.445	0.491	0.499	0.517	0.474	0.531	0.544	0.565	0.537	0.525	0.428	0.428	0.271
140.25	0.945	0.943	0.941		1.158	1.076	1.136		0.894	0.842	0.88	0.951	0.939	0.909	0.957	0.884	0.824	0.928	0.986	0.946	0.709	0.831	0.882	0.778	0.665	0.69	0.719	0.726		140.25	0.219	0.283	0.261	0.304	0.729	0.659	0.444	0.496	0.501	0.519	0.473	0.533	0.547	0.566	0.539	0.522	0.43	0.43	0.272
140.5	0.939	0.948	0.939		1.148	1.092	1.128		0.894	0.844	0.88	0.949	0.944	0.913	0.957	0.883	0.838	0.941	0.992	0.94	0.71	0.833	0.885	0.785	0.656	0.689	0.709	0.733		140.5	0.221	0.283	0.261	0.305	0.733	0.659	0.446	0.497	0.502	0.516	0.473	0.534	0.551	0.564	0.54	0.522	0.45	0.436	0.284
140.75	0.938	0.955	0.937		1.134	1.103	1.128		0.886	0.849	0.879	0.951	0.942	0.918	0.958	0.889	0.838	0.937	0.985	0.94	0.764	0.841	0.882	0.788	0.744	0.691	0.7	0.747		140.75	0.219	0.285	0.261	0.306	0.735	0.667	0.445	0.495	0.501	0.518	0.475	0.53	0.551	0.565	0.539	0.526	0.438	0.428	0.282
141	0.939	0.956	0.941		1.13	1.101	1.134		0.889	0.851	0.885	0.952	0.942	0.918	0.96	0.888	0.853	0.948	0.99	0.939	0.709	0.84	0.885	0.786	0.752	0.704	0.712	0.744		141	0.219	0.285	0.262	0.303	0.739	0.668	0.448	0.494	0.5	0.518	0.476	0.532	0.548	0.567	0.542	0.523	0.452	0.435	0.286
141.25	0.942	0.964	0.941		1.128	1.118	1.134		0.89	0.849	0.886	0.956	0.939	0.921	0.961	0.894	0.864	0.943	1.002	0.939	0.711	0.838	0.884	0.79	0.75	0.71	0.715	0.744		141.25	0.219	0.283	0.26	0.302	0.739	0.669	0.446	0.494	0.503	0.522	0.476	0.529	0.551	0.571	0.539	0.524	0.442	0.437	0.289
141.5	0.943	0.967	0.942		1.132	1.124	1.134		0.892	0.854	0.888	0.956	0.945	0.928	0.964	0.9	0.857	0.95	1	0.931	0.715	0.85	0.88	0.796	0.746	0.724	0.712	0.743		141.5	0.215	0.287	0.261	0.302	0.741	0.673	0.445	0.495	0.503	0.523	0.473	0.529	0.55	0.571	0.545	0.526	0.448	0.435	0.297
141.75	0.946	0.967	0.945		1.134	1.126	1.132		0.892	0.858	0.89	0.958	0.947	0.933	0.965	0.904	0.851	0.954	0.99	0.933	0.713	0.855	0.882	0.789	0.744	0.734	0.721	0.74		141.75	0.217	0.287	0.259	0.305	0.746	0.68	0.446	0.493	0.505	0.525	0.474	0.531	0.551	0.572	0.54	0.524	0.45	0.442	0.29
142	0.95	0.967	0.946		1.14	1.122	1.136		0.897	0.857	0.894	0.961	0.947	0.935	0.968	0.902	0.864	0.954	1.01	0.936	0.718	0.857	0.884	0.791	0.75	0.725	0.714	0.743		142	0.216	0.285	0.262	0.303	0.747	0.676	0.444	0.491	0.503	0.522	0.476	0.529	0.552	0.572	0.541	0.529	0.444	0.444	0.288
142.25	0.942	0.967	0.946		1.138	1.138	1.136		0.898	0.862	0.896	0.961	0.951	0.938	0.968	0.902	0.879	0.967	1	0.936	0.718	0.864	0.883	0.79	0.749	0.732	0.729	0.754		142.25	0.22	0.289	0.259	0.303	0.752	0.68	0.445	0.491	0.503	0.525	0.474	0.529	0.552	0.572	0.541	0.527	0.444	0.45	0.295
142.5	0.951	0.971	0.948		1.14	1.144	1.14		0.897	0.857	0.897	0.964	0.952	0.94	0.97	0.911	0.875	0.967	1.01	0.945	0.715	0.862	0.882	0.79	0.753	0.735	0.747	0.749		142.5	0.214	0.29	0.26	0.306	0.752	0.689	0.441	0.496	0.502	0.528	0.476	0.528	0.551	0.578	0.541	0.528	0.446	0.446	0.29
142.75	0.954	0.97	0.95		1.136	1.136	1.14		0.899	0.867	0.898	0.964	0.954	0.938	0.972	0.91	0.88	0.972	1.015	0.946	0.713	0.866	0.884	0.794	0.744	0.738	0.748	0.758		142.75	0.215	0.291	0.26	0.303	0.754	0.687	0.442	0.493	0.503	0.526	0.476	0.533	0.555	0.58	0.539	0.527	0.455	0.444	0.293
143	0.947	0.976	0.952		1.14	1.154	1.142		0.902	0.875	0.9	0.966	0.957	0.945	0.975	0.921	0.876	0.993	1.018	0.941	0.715	0.866	0.878	0.8	0.752	0.755	0.751	0.758		143	0.216	0.293	0.259	0.303	0.755	0.691	0.446	0.493	0.504	0.53	0.477	0.532	0.555	0.584	0.543	0.529	0.451	0.448	0.294
143.25	0.948	0.975	0.954		1.136	1.148	1.146		0.904	0.874	0.903	0.968	0.957	0.944	0.977	0.918	0.88	0.993	1.015	0.955	0.717	0.873	0.879	0.799	0.755	0.757	0.742	0.756		143.25	0.216	0.294	0.261	0.303	0.756	0.692	0.444	0.496	0.503	0.528	0.478	0.533	0.556	0.583	0.544	0.529	0.459	0.451	0.29
143.5	0.956	0.979	0.958		1.152	1.152	1.144		0.909	0.881	0.904	0.969	0.962	0.947	0.975	0.916	0.89	0.989	1.003	0.949	0.724	0.876	0.885	0.796	0.753	0.755	0.739	0.758		143.5	0.219	0.294	0.258	0.304	0.762	0.697	0.443	0.499	0.504	0.531	0.479	0.533	0.554	0.586	0.547	0.527	0.468	0.45	0.292
143.75	0.963	0.979	0.956		1.169	1.146	1.144		0.913	0.882	0.906	0.97	0.966	0.948	0.976	0.926	0.891	0.996	1.006	0.941	0.723	0.876	0.881	0.797	0.758	0.758	0.749	0.756		143.75	0.218	0.296	0.262	0.305	0.763	0.699	0.446	0.499	0.508	0.532	0.479	0.534	0.558	0.588	0.545	0.527	0.484	0.453	0.294
144	0.965	0.975	0.965		1.166	1.126	1.16		0.912	0.878	0.912	0.976	0.968	0.944	0.986	0.923	0.908	1	1.016	0.954	0.727	0.864	0.896	0.798	0.752	0.757	0.756	0.758		144	0.219	0.298	0.262	0.304	0.763	0.7	0.446	0.496	0.508	0.531	0.481	0.534	0.559	0.588	0.548	0.529	0.479	0.458	0.294
144.25	0.971	0.974	0.967		1.177	1.112	1.164		0.916	0.88	0.912	0.981	0.972	0.944	0.986	0.926	0.899	0.989	1.022	0.958	0.731	0.865	0.888	0.804	0.763	0.764	0.76	0.757		144.25	0.219	0.297	0.26	0.306	0.769	0.705	0.441	0.493	0.509	0.535	0.482	0.533	0.56	0.586	0.547	0.529	0.491	0.457	0.297
144.5	0.971	0.974	0.967		1.182	1.103	1.162		0.916	0.88	0.915	0.983	0.972	0.944	0.988	0.924	0.915	0.992	1.024	0.954	0.729	0.859	0.887	0.803	0.762	0.765	0.755	0.774		144.5	0.219	0.295	0.263	0.304	0.773	0.71	0.445	0.496	0.51	0.536	0.482	0.54	0.563	0.59	0.549	0.531	0.49	0.458	0.302
144.75	0.965	0.974	0.968		1.164	1.105	1.169		0.915	0.881	0.917	0.985	0.972	0.944	0.99	0.923	0.914	0.994	1.026	0.984	0.728	0.862	0.887	0.808	0.757	0.758	0.758	0.765		144.75	0.218	0.295	0.262	0.305	0.774	0.713	0.445	0.495	0.511	0.536	0.484	0.541	0.56	0.592	0.548	0.532	0.49	0.45	0.306
145	0.965	0.974	0.974		1.16	1.101	1.173		0.916	0.883	0.921	0.988	0.976	0.945	0.994	0.928	0.914	0.999	1.022	0.982	0.721	0.872	0.901	0.81	0.757	0.762	0.759	0.776		145	0.218	0.293	0.262	0.306	0.778	0.714	0.446	0.497	0.511	0.535	0.485	0.541	0.557	0.591	0.556	0.533	0.498	0.459	0.304
145.25	0.968	0.968	0.978		1.164	1.105	1.182		0.918	0.882	0.923	0.987	0.979	0.949	0.996	0.927	0.915	0.996	1.022	0.981	0.726	0.868	0.9	0.81	0.752	0.766	0.755	0.774		145.25	0.221	0.291	0.264	0.306	0.779	0.714	0.447	0.497	0.51	0.532	0.484	0.544	0.56	0.591	0.55	0.535	0.495	0.453	0.302
145.5	0.97	0.97	0.976		1.158	1.099	1.169		0.921	0.887	0.925	0.988	0.979	0.948	0.988	0.93	0.919	1	1.021	0.978	0.726	0.872	0.9	0.809	0.752	0.753	0.763	0.789		145.5	0.218	0.289	0.262	0.303	0.781	0.718	0.446	0.496	0.511	0.536	0.485	0.546	0.561	0.592	0.553	0.535	0.507	0.452	0.305
145.75	0.967	0.971	0.976		1.15	1.099	1.171		0.921	0.887	0.924	0.991	0.979	0.949	0.993	0.929	0.909	0.996	1.026	0.991	0.721	0.871	0.894	0.818	0.664	0.757	0.768	0.783		145.75	0.218	0.289	0.264	0.308	0.784	0.721	0.446	0.496	0.513	0.532	0.486	0.546	0.56	0.592	0.556	0.537	0.506	0.451	0.303
146	0.967	0.972	0.976		1.152	1.101	1.166		0.922	0.886	0.924	0.99	0.983	0.951	0.997	0.93	0.913	1.005	1.024	0.984	0.72	0.873	0.893	0.829	0.668	0.758	0.779	0.79		146	0.219	0.293	0.263	0.308	0.788	0.722	0.449	0.498	0.513	0.534	0.487	0.546	0.562	0.596	0.557	0.536	0.51	0.46	0.301
146.25	0.971	0.975	0.978		1.158	1.105	1.162		0.924	0.891	0.922	0.992	0.983	0.956	0.998	0.937	0.921	1.01	1.026	0.984	0.724	0.876	0.896	0.83	0.672	0.763	0.772	0.789		146.25	0.215	0.29	0.264	0.307	0.79	0.725	0.447	0.497	0.513	0.534	0.488	0.546	0.562	0.595	0.555	0.54	0.504	0.454	0.3
146.5	0.986	0.978	0.978		1.182	1.107	1.162		0.932	0.892	0.923	0.994	0.99	0.952	1	0.937	0.919	1.015	1.026	0.988	0.723	0.88	0.902	0.84	0.67	0.763	0.772	0.789		146.5	0.219	0.292	0.263	0.305	0.792	0.725	0.448	0.496	0.513	0.536	0.487	0.545	0.564	0.598	0.559	0.537	0.519	0.462	0.309
146.75	0.989	0.979	0.98		1.195	1.103	1.164		0.938	0.895	0.927	0.995	0.994	0.956	1.001	0.942	0.916	1.003	1.032	0.992	0.733	0.872	0.893	0.846	0.678	0.752	0.778	0.798		146.75	0.216	0.289	0.261	0.306	0.79	0.729	0.446	0.498	0.513	0.537	0.489	0.546	0.566	0.596	0.561	0.539	0.504	0.453	0.302
147	0.992	0.979	0.982		1.195	1.105	1.169		0.937	0.891	0.929	0.997	0.998	0.954	1.004	0.94	0.921	1.006	1.036	0.991	0.732	0.877	0.894	0.855	0.683	0.765	0.771	0.806		147	0.221	0.291	0.262	0.308	0.796	0.731	0.446	0.497	0.513	0.537	0.489	0.542	0.569	0.598	0.558	0.537	0.511	0.455	0.303
147.25	0.996	0.982	0.985		1.2	1.105	1.164		0.942	0.899	0.929	0.998	1	0.96	1.003	0.943	0.917	1.021	1.036	0.999	0.738	0.88	0.889	0.862	0.688	0.766	0.773	0.806		147.25	0.222	0.291	0.265	0.307	0.8	0.733	0.446	0.497	0.518	0.539	0.49	0.545	0.566	0.6	0.562	0.537	0.511	0.456	0.317
147.5	0.993	0.983	0.986		1.202	1.107	1.169		0.943	0.904	0.932	0.998	1	0.962	1.007	0.944	0.923	1.021	1.033	0.999	0.739	0.873	0.899	0.861	0.687	0.758	0.772	0.804		147.5	0.222	0.289	0.264	0.307	0.803	0.738	0.449	0.499	0.519	0.537	0.49	0.546	0.562	0.602	0.56	0.536	0.522	0.459	0.31
147.75	0.992	0.983	0.987		1.188	1.105	1.173		0.943	0.905	0.933	1.001	0.996	0.964	1.009	0.951	0.917	1.016	1.038	0.995	0.736	0.878	0.902	0.862	0.681	0.762	0.782	0.804		147.75	0.22	0.287	0.265	0.305	0.807	0.74	0.443	0.494	0.519	0.537	0.491	0.545	0.568	0.6	0.558	0.54	0.527	0.456	0.304
148	0.992	0.985	0.99		1.179	1.105	1.188		0.944	0.906	0.939	1.005	0.997	0.964	1.012	0.945	0.913	1.01	1.044	0.999	0.736	0.872	0.909	0.86	0.684	0.761	0.787	0.818		148	0.221	0.289	0.261	0.303	0.808	0.743	0.444	0.494	0.518	0.538	0.489	0.544	0.568	0.601	0.561	0.538	0.537	0.462	0.311
148.25	0.992	0.987	0.995		1.177	1.105	1.195		0.945	0.906	0.944	1.01	0.998	0.965	1.016	0.948	0.919	1.021	1.051	0.992	0.737	0.879	0.912	0.869	0.679	0.768	0.78	0.816		148.25	0.223	0.293	0.265	0.307	0.809	0.748	0.446	0.494	0.516	0.539	0.491	0.544	0.573	0.602	0.56	0.54	0.522	0.462	0.317
148.5	0.992	0.987	0.999		1.175	1.109	1.2		0.944	0.907	0.947	1.013	1	0.968	1.021	0.948	0.916	1.008	1.051	0.998	0.735	0.88	0.908	0.872	0.685	0.766	0.789	0.817		148.5	0.219	0.289	0.264	0.308	0.81	0.751	0.445	0.496	0.517	0.539	0.49	0.552	0.57	0.606	0.559	0.543	0.522	0.462	0.319
148.75	0.993	0.99	1.008		1.175	1.114	1.204		0.944	0.91	0.948	1.016	1.001	0.969	1.022	0.952	0.919	1.026	1.052	0.998	0.735	0.883	0.915	0.873	0.681	0.768	0.8	0.801		148.75	0.218	0.292	0.265	0.307	0.812	0.752	0.445	0.494	0.516	0.54	0.492	0.551	0.566	0.602	0.562	0.546	0.523	0.462	0.315
149	0.996	0.992	1.009		1.177	1.114	1.202		0.948	0.913	0.949	1.017	1.003	0.972	1.022	0.949	0.921	1.019	1.052	1.001	0.735	0.877	0.92	0.873	0.684	0.763	0.798	0.809		149	0.219	0.287	0.263	0.311	0.812	0.752	0.447	0.498	0.52	0.543	0.493	0.553	0.566	0.606	0.562	0.544	0.538	0.465	0.31
149.25	0.996	0.995	1.009		1.182	1.109	1.195		0.951	0.911	0.951	1.016	1.003	0.972	1.024	0.953	0.93	1.018	1.049	1.002	0.736	0.885	0.925	0.876	0.685	0.766	0.798	0.82		149.25	0.219	0.29	0.264	0.309	0.816	0.756	0.445	0.5	0.519	0.543	0.495	0.554	0.567	0.606	0.566	0.542	0.55	0.468	0.318
149.5	1	0.997	1.009		1.184	1.114	1.193		0.953	0.916	0.951	1.014	1.009	0.973	1.022	0.954	0.935	1.029	1.048	0.999	0.739	0.887	0.924	0.871	0.682	0.764	0.793	0.83		149.5	0.219	0.288	0.265	0.309	0.817	0.759	0.446	0.502	0.523	0.545	0.498	0.556	0.564	0.609	0.572	0.551	0.553	0.473	0.322
149.75	1.006	0.997	1.009		1.204	1.114	1.188		0.958	0.918	0.952	1.016	1.015	0.977	1.022	0.954	0.94	1.027	1.049	0.998	0.742	0.881	0.921	0.874	0.69	0.766	0.792	0.835		149.75	0.216	0.291	0.262	0.311	0.818	0.76	0.448	0.501	0.519	0.544	0.498	0.555	0.567	0.612	0.568	0.544	0.543	0.477	0.331
150	1.009	0.999	1.012		1.207	1.12	1.186		0.96	0.918	0.953	1.019	1.016	0.977	1.025	0.953	0.948	1.029	1.052	1.004	0.744	0.883	0.92	0.882	0.682	0.772	0.793	0.84		150	0.218	0.292	0.265	0.307	0.821	0.763	0.448	0.499	0.523	0.545	0.498	0.554	0.571	0.613	0.567	0.547	0.542	0.477	0.324
150.25	1.014	1.002	1.012		1.218	1.124	1.184		0.962	0.921	0.956	1.019	1.021	0.98	1.028	0.956	0.95	1.029	1.059	1.008	0.746	0.887	0.92	0.882	0.684	0.777	0.797	0.836		150.25	0.22	0.294	0.264	0.308	0.825	0.771	0.446	0.502	0.523	0.547	0.495	0.552	0.572	0.614	0.569	0.545	0.549	0.474	0.332
150.5	1.017	1.003	1.014		1.214	1.124	1.186		0.966	0.919	0.957	1.02	1.019	0.979	1.03	0.958	0.948	1.038	1.056	1.01	0.742	0.883	0.92	0.881	0.693	0.772	0.816	0.835		150.5	0.222	0.293	0.264	0.31	0.828	0.767	0.445	0.498	0.523	0.544	0.499	0.553	0.579	0.617	0.569	0.547	0.556	0.483	0.322
150.75	1.009	1.005	1.015		1.2	1.116	1.186		0.964	0.921	0.957	1.023	1.016	0.984	1.032	0.957	0.947	1.041	1.059	1.016	0.744	0.887	0.921	0.879	0.694	0.772	0.81	0.833		150.75	0.221	0.292	0.263	0.31	0.827	0.772	0.445	0.498	0.525	0.548	0.497	0.554	0.571	0.615	0.57	0.546	0.562	0.486	0.329
151	1.012	1.003	1.015		1.202	1.12	1.186		0.965	0.922	0.96	1.023	1.021	0.986	1.032	0.96	0.946	1.033	1.061	1.013	0.744	0.887	0.923	0.885	0.696	0.782	0.804	0.836		151	0.22	0.291	0.264	0.31	0.831	0.774	0.445	0.496	0.523	0.549	0.496	0.553	0.577	0.615	0.569	0.547	0.556	0.468	0.339
151.25	1.009	1.009	1.02		1.202	1.128	1.193		0.969	0.927	0.962	1.026	1.024	0.987	1.035	0.961	0.956	1.041	1.069	1.017	0.748	0.888	0.936	0.891	0.693	0.782	0.805	0.836		151.25	0.222	0.293	0.265	0.308	0.837	0.781	0.448	0.496	0.525	0.548	0.494	0.554	0.575	0.618	0.573	0.545	0.564	0.479	0.351
151.5	1.014	1.012	1.026		1.202	1.126	1.207		0.969	0.927	0.962	1.031	1.024	0.983	1.038	0.96	0.958	1.044	1.067	1.022	0.739	0.889	0.942	0.888	0.696	0.77	0.809	0.84		151.5	0.218	0.292	0.262	0.308	0.838	0.784	0.445	0.497	0.524	0.55	0.496	0.556	0.574	0.619	0.569	0.547	0.562	0.478	0.351
151.75	1.017	1.009	1.032		1.204	1.124	1.214		0.97	0.929	0.966	1.034	1.025	0.986	1.041	0.961	0.964	1.048	1.076	1.017	0.742	0.885	0.936	0.893	0.703	0.78	0.812	0.833		151.75	0.217	0.294	0.262	0.307	0.843	0.784	0.445	0.5	0.528	0.551	0.495	0.553	0.578	0.622	0.57	0.547	0.568	0.475	0.334
152	1.018	1.014	1.032		1.207	1.136	1.221		0.972	0.933	0.969	1.036	1.027	0.993	1.036	0.965	0.964	1.056	1.074	1.019	0.751	0.891	0.941	0.892	0.704	0.791	0.814	0.842		152	0.219	0.29	0.261	0.31	0.847	0.784	0.445	0.499	0.527	0.55	0.497	0.559	0.575	0.623	0.573	0.552	0.57	0.476	0.345
152.25	1.021	1.02	1.037		1.202	1.142	1.228		0.97	0.937	0.973	1.04	1.03	0.996	1.041	0.965	0.961	1.059	1.081	1.022	0.746	0.896	0.941	0.895	0.702	0.795	0.816	0.843		152.25	0.218	0.291	0.266	0.311	0.852	0.788	0.446	0.5	0.526	0.55	0.5	0.557	0.575	0.623	0.573	0.552	0.569	0.475	0.356
152.5	1.021	1.023	1.03		1.204	1.15	1.216		0.975	0.938	0.973	1.039	1.03	0.998	1.041	0.965	0.968	1.057	1.078	1.023	0.747	0.893	0.935	0.897	0.701	0.792	0.816	0.845		152.5	0.219	0.292	0.268	0.313	0.855	0.791	0.444	0.5	0.527	0.553	0.501	0.56	0.574	0.625	0.568	0.552	0.576	0.48	0.36
152.75	1.023	1.024	1.034		1.207	1.152	1.211		0.976	0.942	0.972	1.039	1.032	1	1.043	0.969	0.967	1.059	1.081	1.02	0.749	0.896	0.934	0.895	0.7	0.783	0.818	0.84		152.75	0.217	0.291	0.266	0.31	0.858	0.796	0.445	0.502	0.529	0.554	0.501	0.561	0.576	0.625	0.574	0.555	0.559	0.483	0.356
153	1.026	1.026	1.032		1.209	1.156	1.209		0.976	0.942	0.975	1.04	1.032	1.001	1.043	0.966	0.969	1.059	1.081	1.025	0.747	0.899	0.93	0.902	0.707	0.792	0.818	0.848		153	0.218	0.294	0.264	0.311	0.862	0.798	0.449	0.499	0.527	0.553	0.502	0.559	0.577	0.627	0.576	0.554	0.579	0.485	0.368
153.25	1.026	1.026	1.037		1.207	1.152	1.218		0.979	0.942	0.972	1.044	1.033	1.004	1.046	0.965	0.965	1.061	1.081	1.026	0.748	0.897	0.937	0.895	0.711	0.789	0.824	0.852		153.25	0.219	0.293	0.266	0.313	0.86	0.799	0.444	0.499	0.528	0.557	0.503	0.559	0.577	0.629	0.575	0.553	0.581	0.482	0.359
153.5	1.029	1.027	1.035		1.211	1.144	1.214		0.98	0.943	0.975	1.044	1.036	1.003	1.049	0.964	0.964	1.066	1.085	1.031	0.744	0.897	0.941	0.9	0.709	0.79	0.823	0.847		153.5	0.219	0.296	0.263	0.311	0.867	0.808	0.445	0.501	0.529	0.558	0.505	0.556	0.578	0.63	0.576	0.552	0.57	0.49	0.364
153.75	1.032	1.026	1.041		1.214	1.144	1.216		0.984	0.944	0.977	1.048	1.036	1.004	1.049	0.98	0.961	1.066	1.086	1.042	0.748	0.9	0.941	0.903	0.697	0.796	0.825	0.858		153.75	0.215	0.296	0.264	0.309	0.866	0.808	0.446	0.499	0.529	0.56	0.502	0.558	0.578	0.631	0.577	0.556	0.582	0.485	0.371
154	1.024	1.026	1.043		1.216	1.142	1.221		0.981	0.944	0.98	1.052	1.038	1.006	1.054	0.981	0.965	1.066	1.086	1.04	0.751	0.899	0.94	0.904	0.707	0.796	0.822	0.865		154	0.219	0.297	0.261	0.31	0.866	0.813	0.445	0.501	0.529	0.56	0.504	0.56	0.582	0.635	0.576	0.553	0.578	0.488	0.374
154.25	1.034	1.029	1.045		1.211	1.142	1.221		0.984	0.94	0.981	1.05	1.038	1.007	1.054	0.98	0.96	1.067	1.092	1.039	0.753	0.896	0.936	0.91	0.7	0.8	0.823	0.859		154.25	0.219	0.296	0.263	0.312	0.868	0.818	0.446	0.499	0.532	0.563	0.503	0.559	0.58	0.637	0.579	0.551	0.575	0.488	0.383
154.5	1.038	1.03	1.046		1.226	1.144	1.223		0.99	0.945	0.983	1.052	1.039	1.009	1.057	0.98	0.96	1.067	1.094	1.034	0.756	0.897	0.937	0.905	0.703	0.798	0.822	0.865		154.5	0.219	0.297	0.265	0.31	0.872	0.817	0.441	0.5	0.532	0.562	0.503	0.56	0.581	0.636	0.579	0.552	0.589	0.498	0.388
154.75	1.046	1.032	1.045		1.243	1.144	1.223		0.994	0.947	0.986	1.055	1.044	1.012	1.059	0.984	0.968	1.067	1.097	1.037	0.76	0.899	0.941	0.907	0.707	0.787	0.817	0.855		154.75	0.222	0.294	0.262	0.312	0.879	0.82	0.445	0.5	0.535	0.565	0.505	0.559	0.585	0.638	0.581	0.555	0.594	0.488	0.378
155	1.053	1.034	1.048		1.251	1.144	1.226		1	0.951	0.987	1.057	1.052	1.012	1.059	0.984	0.972	1.074	1.097	1.04	0.767	0.906	0.942	0.905	0.714	0.802	0.819	0.859		155	0.221	0.298	0.261	0.313	0.88	0.822	0.448	0.499	0.535	0.564	0.503	0.561	0.584	0.638	0.583	0.556	0.593	0.488	0.385
155.25	1.043	1.035	1.048		1.246	1.142	1.226		1	0.948	0.987	1.057	1.052	1.012	1.061	0.983	0.971	1.074	1.104	1.042	0.765	0.904	0.942	0.904	0.71	0.808	0.826	0.866		155.25	0.222	0.297	0.263	0.312	0.884	0.824	0.444	0.499	0.536	0.562	0.506	0.564	0.584	0.64	0.578	0.554	0.593	0.491	0.391
155.5	1.045	1.035	1.048		1.233	1.146	1.226		0.998	0.953	0.988	1.058	1.046	1.015	1.061	0.987	0.975	1.073	1.104	1.039	0.764	0.902	0.94	0.911	0.708	0.808	0.818	0.872		155.5	0.222	0.297	0.266	0.311	0.889	0.828	0.441	0.498	0.537	0.566	0.505	0.563	0.586	0.642	0.576	0.555	0.599	0.49	0.384
155.75	1.041	1.041	1.051		1.231	1.152	1.223		0.997	0.957	0.991	1.062	1.049	1.018	1.064	0.981	0.982	1.081	1.099	1.037	0.761	0.905	0.946	0.909	0.711	0.794	0.815	0.877		155.75	0.219	0.296	0.262	0.31	0.888	0.829	0.442	0.501	0.538	0.565	0.505	0.564	0.587	0.643	0.582	0.558	0.609	0.494	0.391
156	1.041	1.048	1.061		1.233	1.169	1.246		1.001	0.96	0.998	1.067	1.047	1.022	1.071	0.987	0.986	1.085	1.104	1.04	0.762	0.912	0.95	0.91	0.707	0.814	0.827	0.875		156	0.22	0.294	0.262	0.311	0.893	0.833	0.444	0.5	0.538	0.568	0.507	0.567	0.587	0.647	0.584	0.558	0.605	0.495	0.399
156.25	1.043	1.054	1.061		1.233	1.188	1.243		1.004	0.97	0.998	1.067	1.054	1.028	1.069	0.992	0.985	1.092	1.108	1.035	0.76	0.915	0.951	0.909	0.707	0.817	0.827	0.882		156.25	0.219	0.295	0.266	0.312	0.894	0.833	0.444	0.5	0.534	0.565	0.507	0.565	0.586	0.642	0.583	0.558	0.605	0.491	0.398
156.5	1.043	1.053	1.064		1.235	1.182	1.248		0.997	0.969	0.996	1.068	1.057	1.028	1.074	0.984	0.983	1.088	1.103	1.037	0.767	0.915	0.953	0.911	0.707	0.825	0.82	0.887		156.5	0.22	0.294	0.262	0.314	0.895	0.839	0.441	0.499	0.535	0.569	0.507	0.568	0.588	0.647	0.583	0.557	0.612	0.486	0.392
156.75	1.043	1.046	1.068		1.235	1.173	1.259		1.006	0.972	1.003	1.072	1.056	1.027	1.076	0.979	0.992	1.09	1.097	1.035	0.76	0.913	0.949	0.905	0.711	0.819	0.826	0.886		156.75	0.22	0.296	0.265	0.313	0.895	0.839	0.448	0.502	0.539	0.569	0.508	0.572	0.59	0.648	0.584	0.561	0.605	0.494	0.405
157	1.048	1.048	1.066		1.235	1.164	1.251		1.009	0.969	1.006	1.072	1.059	1.021	1.076	0.98	0.985	1.094	1.118	1.039	0.761	0.907	0.948	0.9	0.713	0.819	0.819	0.883		157	0.219	0.297	0.265	0.314	0.9	0.844	0.444	0.501	0.539	0.57	0.51	0.573	0.59	0.65	0.585	0.558	0.607	0.496	0.41
157.25	1.053	1.05	1.059		1.233	1.166	1.246		1.01	0.969	1.004	1.073	1.059	1.027	1.074	0.974	0.99	1.088	1.127	1.04	0.766	0.904	0.95	0.893	0.714	0.824	0.824	0.885		157.25	0.218	0.296	0.267	0.317	0.903	0.852	0.45	0.505	0.538	0.57	0.513	0.574	0.592	0.653	0.585	0.566	0.622	0.503	0.406
157.5	1.053	1.048	1.063		1.238	1.171	1.243		1.012	0.97	1.007	1.073	1.061	1.028	1.076	0.979	0.985	1.094	1.116	1.034	0.768	0.902	0.955	0.9	0.721	0.829	0.827	0.888		157.5	0.22	0.296	0.265	0.314	0.902	0.857	0.445	0.502	0.537	0.573	0.51	0.577	0.591	0.655	0.586	0.563	0.623	0.511	0.403
157.75	1.056	1.051	1.064		1.238	1.169	1.246		1.015	0.968	1.01	1.075	1.064	1.03	1.079	0.981	0.987	1.094	1.118	1.029	0.76	0.911	0.953	0.902	0.717	0.832	0.823	0.892		157.75	0.221	0.301	0.268	0.312	0.906	0.855	0.445	0.5	0.542	0.573	0.512	0.572	0.595	0.659	0.59	0.565	0.635	0.518	0.409
158	1.056	1.053	1.061		1.243	1.169	1.246		1.015	0.975	1.012	1.077	1.064	1.033	1.081	0.977	0.992	1.097	1.123	1.031	0.762	0.906	0.95	0.903	0.722	0.834	0.823	0.893		158	0.219	0.301	0.266	0.314	0.909	0.857	0.446	0.502	0.54	0.576	0.513	0.573	0.592	0.659	0.591	0.563	0.636	0.504	0.414
158.25	1.056	1.059	1.063		1.231	1.169	1.246		1.013	0.973	1.013	1.079	1.062	1.033	1.081	0.977	0.985	1.097	1.121	1.037	0.766	0.909	0.948	0.903	0.722	0.838	0.825	0.899		158.25	0.219	0.296	0.267	0.311	0.913	0.859	0.446	0.502	0.542	0.576	0.511	0.572	0.596	0.661	0.588	0.562	0.625	0.508	0.412
158.5	1.064	1.059	1.066		1.251	1.166	1.246		1.021	0.979	1.013	1.075	1.071	1.035	1.083	0.98	0.992	1.086	1.121	1.04	0.771	0.904	0.951	0.902	0.721	0.836	0.828	0.901		158.5	0.222	0.297	0.267	0.312	0.914	0.862	0.443	0.499	0.545	0.575	0.513	0.572	0.597	0.661	0.591	0.569	0.634	0.504	0.418
158.75	1.071	1.063	1.066		1.267	1.171	1.246		1.022	0.979	1.013	1.079	1.074	1.036	1.085	0.98	1.002	1.101	1.116	1.035	0.774	0.911	0.951	0.908	0.719	0.835	0.826	0.905		158.75	0.22	0.299	0.266	0.313	0.919	0.863	0.447	0.499	0.546	0.577	0.512	0.572	0.597	0.664	0.593	0.564	0.645	0.51	0.423
159	1.073	1.071	1.07		1.264	1.197	1.253		1.021	0.984	1.019	1.082	1.072	1.044	1.086	0.974	1	1.097	1.114	1.04	0.778	0.915	0.955	0.905	0.714	0.839	0.833	0.903		159	0.221	0.299	0.266	0.313	0.92	0.866	0.444	0.503	0.548	0.576	0.512	0.571	0.599	0.664	0.595	0.567	0.654	0.503	0.422
159.25	1.076	1.075	1.075		1.277	1.197	1.267		1.028	0.987	1.022	1.086	1.078	1.046	1.09	0.973	1.002	1.103	1.112	1.037	0.777	0.913	0.954	0.903	0.723	0.843	0.842	0.9		159.25	0.221	0.3	0.266	0.313	0.925	0.868	0.445	0.502	0.55	0.578	0.514	0.574	0.603	0.666	0.592	0.567	0.641	0.504	0.432
159.5	1.076	1.078	1.08		1.267	1.204	1.272		1.027	0.99	1.027	1.089	1.078	1.044	1.095	0.981	0.997	1.104	1.119	1.04	0.778	0.917	0.957	0.899	0.716	0.848	0.851	0.902		159.5	0.227	0.298	0.264	0.318	0.927	0.87	0.442	0.502	0.555	0.577	0.514	0.572	0.603	0.664	0.593	0.563	0.634	0.505	0.43
159.75	1.073	1.078	1.082		1.253	1.202	1.275		1.025	0.991	1.022	1.091	1.076	1.047	1.095	0.976	0.996	1.104	1.114	1.037	0.771	0.914	0.954	0.903	0.719	0.851	0.841	0.911		159.75	0.226	0.295	0.266	0.315	0.93	0.871	0.445	0.505	0.551	0.58	0.515	0.578	0.603	0.668	0.589	0.569	0.629	0.511	0.426
160	1.073	1.075	1.083		1.256	1.186	1.28		1.03	0.99	1.024	1.089	1.079	1.044	1.099	0.97	1.005	1.097	1.116	1.039	0.776	0.909	0.958	0.904	0.711	0.846	0.846	0.911		160	0.221	0.3	0.266	0.316	0.932	0.877	0.445	0.504	0.551	0.581	0.516	0.579	0.603	0.672	0.594	0.57	0.652	0.51	0.427
160.25	1.075	1.075	1.082		1.253	1.188	1.277		1.028	0.988	1.027	1.093	1.079	1.046	1.095	0.976	1.003	1.097	1.118	1.035	0.776	0.911	0.955	0.9	0.715	0.854	0.85	0.897		160.25	0.22	0.302	0.266	0.316	0.936	0.881	0.448	0.507	0.551	0.583	0.516	0.579	0.607	0.675	0.594	0.573	0.658	0.514	0.453
160.5	1.078	1.075	1.083		1.253	1.184	1.272		1.03	0.991	1.027	1.093	1.081	1.047	1.097	0.979	1.003	1.092	1.119	1.034	0.774	0.906	0.954	0.897	0.717	0.843	0.848	0.919		160.5	0.219	0.301	0.266	0.316	0.935	0.883	0.447	0.504	0.551	0.603	0.516	0.583	0.607	0.676	0.594	0.571	0.66	0.515	0.447
160.75	1.082	1.075	1.083		1.256	1.188	1.269		1.03	0.983	1.028	1.093	1.079	1.049	1.097	0.973	1.012	1.095	1.108	1.028	0.771	0.907	0.951	0.904	0.721	0.858	0.841	0.92		160.75	0.223	0.303	0.267	0.316	0.938	0.884	0.449	0.507	0.552	0.606	0.521	0.578	0.607	0.676	0.598	0.577	0.665	0.521	0.451
161	1.082	1.075	1.087		1.253	1.184	1.267		1.035	0.98	1.033	1.096	1.081	1.051	1.101	0.979	1.012	1.097	1.112	1.028	0.775	0.9	0.958	0.903	0.725	0.857	0.842	0.927		161	0.219	0.302	0.267	0.316	0.941	0.888	0.45	0.508	0.549	0.605	0.52	0.581	0.605	0.679	0.599	0.575	0.68	0.523	0.46
161.25	1.076	1.078	1.085		1.253	1.182	1.267		1.035	0.986	1.033	1.096	1.088	1.054	1.101	0.974	1.016	1.09	1.116	1.016	0.78	0.906	0.958	0.901	0.725	0.863	0.837	0.914		161.25	0.22	0.3	0.269	0.317	0.942	0.891	0.45	0.507	0.55	0.605	0.519	0.579	0.608	0.677	0.6	0.571	0.676	0.523	0.464
161.5	1.082	1.08	1.087		1.256	1.186	1.267		1.038	0.988	1.035	1.098	1.086	1.054	1.101	0.977	1.009	1.094	1.121	1.017	0.776	0.906	0.954	0.901	0.725	0.856	0.84	0.925		161.5	0.223	0.299	0.265	0.313	0.946	0.893	0.444	0.508	0.553	0.605	0.518	0.579	0.607	0.677	0.597	0.574	0.687	0.523	0.455
161.75	1.085	1.082	1.085		1.256	1.188	1.267		1.039	0.991	1.035	1.1	1.088	1.056	1.105	0.974	1.015	1.083	1.112	1.014	0.776	0.905	0.945	0.897	0.722	0.862	0.833	0.929		161.75	0.222	0.301	0.267	0.316	0.946	0.895	0.445	0.503	0.553	0.609	0.518	0.575	0.608	0.679	0.597	0.571	0.688	0.525	0.458
162	1.087	1.092	1.09		1.259	1.211	1.269		1.039	0.997	1.038	1.102	1.092	1.061	1.105	0.987	1.018	1.11	1.108	1.019	0.769	0.907	0.946	0.9	0.725	0.865	0.84	0.936		162	0.219	0.301	0.269	0.315	0.949	0.897	0.448	0.503	0.556	0.609	0.52	0.58	0.609	0.682	0.598	0.574	0.687	0.526	0.466
162.25	1.089	1.098	1.092		1.259	1.223	1.272		1.041	1.003	1.038	1.103	1.094	1.066	1.108	0.983	1.018	1.108	1.108	1.008	0.776	0.911	0.946	0.9	0.721	0.872	0.835	0.938		162.25	0.218	0.3	0.267	0.315	0.951	0.898	0.446	0.507	0.552	0.607	0.522	0.58	0.611	0.683	0.601	0.576	0.688	0.528	0.465
162.5	1.09	1.098	1.098		1.259	1.218	1.28		1.046	1.006	1.043	1.107	1.095	1.067	1.108	0.987	1.016	1.112	1.112		0.783	0.912	0.95		0.719	0.868	0.837			162.5	0.218	0.302	0.263	0.313	0.956	0.901	0.444	0.505	0.553	0.609	0.52	0.58	0.61	0.686	0.601	0.57	0.694	0.522	0.47
162.75	1.09	1.096	1.103		1.256	1.218	1.289		1.044	1.007	1.046	1.111	1.092	1.067	1.112	0.988	1.024	1.114	1.121		0.773	0.909	0.961		0.716	0.865	0.839			162.75	0.221	0.303	0.265	0.318	0.956	0.902	0.445	0.508	0.553	0.61	0.52	0.582	0.61	0.69	0.601	0.574	0.674	0.527	0.465
163	1.098	1.092	1.105		1.272	1.204	1.291		1.047	1.006	1.047	1.113	1.097	1.066	1.114	1.001	1.026	1.116	1.129		0.778	0.907	0.959		0.717	0.863	0.841			163	0.221	0.301	0.266	0.317	0.962	0.907	0.448	0.506	0.554	0.613	0.519	0.585	0.614	0.688	0.598	0.578	0.675	0.53	0.477
163.25	1.103	1.092	1.107		1.291	1.2	1.294		1.052	1.007	1.043	1.115	1.105	1.067	1.12	1.005	1.036	1.112	1.131		0.785	0.904	0.961		0.727	0.867	0.839			163.25	0.222	0.302	0.267	0.316	0.971	0.909	0.448	0.507	0.557	0.612	0.522	0.584	0.617	0.69	0.604	0.578	0.675	0.531	0.479
163.5	1.105	1.096	1.109		1.289	1.204	1.297		1.047	1.007	1.046	1.116	1.105	1.071	1.12	1.004	1.038	1.108	1.131		0.783	0.902	0.958		0.732	0.87	0.842			163.5	0.224	0.303	0.268	0.319	0.975	0.908	0.45	0.51	0.557	0.613	0.522	0.584	0.622	0.692	0.604	0.577	0.681	0.529	0.474
163.75	1.107	1.098	1.109		1.3	1.211	1.291		1.054	1.009	1.049	1.118	1.106	1.074	1.121	1.003	1.041	1.103	1.127		0.787	0.902	0.95		0.734	0.873	0.843			163.75	0.222	0.305	0.268	0.316	0.972	0.915	0.448	0.507	0.56	0.616	0.522	0.586	0.619	0.693	0.607	0.582	0.694	0.541	0.471
164	1.114		1.111		1.306		1.289		1.061		1.049	1.118	1.112		1.123		1.044		1.127		0.793		0.959		0.736		0.841			164	0.223	0.304	0.269	0.321	0.976	0.914	0.448	0.508	0.558	0.611	0.523	0.589	0.622	0.695	0.605	0.581	0.695	0.534	0.487
164.25	1.103		1.107		1.283		1.294		1.057		1.052	1.12	1.101		1.123		1.043		1.133		0.781		0.957		0.73		0.838			164.25	0.226	0.303	0.268	0.319	0.979	0.915	0.448	0.507	0.558	0.615	0.527	0.591	0.624	0.694	0.606	0.583	0.702	0.531	0.492
164.5	1.105		1.109		1.28		1.294		1.057		1.054	1.122	1.106		1.127		1.043		1.133		0.784		0.954		0.726		0.843			164.5	0.223	0.302	0.267	0.321	0.979	0.918	0.45	0.51	0.561	0.615	0.526	0.589	0.625	0.694	0.612	0.586	0.715	0.527	0.492
164.75	1.103		1.112		1.28		1.297		1.061		1.056	1.124	1.112		1.118		1.046		1.139		0.783		0.957		0.725		0.836			164.75	0.224	0.303	0.27	0.318	0.981	0.92	0.447	0.509	0.563	0.625	0.524	0.588	0.627	0.695	0.609	0.586	0.721	0.537	0.489
165	1.103		1.116		1.28		1.297		1.061		1.057	1.126	1.112		1.125		1.051		1.135		0.784		0.958		0.726		0.843			165	0.222	0.303	0.268	0.318	0.982	0.922	0.448	0.508	0.56	0.616	0.526	0.587	0.627	0.696	0.613	0.583	0.712	0.541	0.498
165.25	1.109		1.114		1.28		1.3		1.062		1.061	1.126	1.114		1.127		1.057		1.137		0.779		0.959		0.734		0.844			165.25	0.226		0.268	0.32	0.983		0.451	0.508	0.561		0.525	0.588	0.628		0.614	0.586	0.733		0.49
165.5	1.109		1.116		1.28		1.3		1.062		1.059	1.126	1.114		1.127		1.061		1.137		0.781		0.957		0.728		0.841			165.5	0.225		0.268	0.318	0.986		0.448	0.508	0.558		0.525	0.588	0.624		0.612	0.584	0.722		0.502
165.75	1.112		1.12		1.28		1.3		1.064		1.062	1.13	1.116		1.133		1.064		1.139		0.778		0.957		0.727		0.842			165.75	0.217		0.266	0.319	0.988		0.45	0.508	0.561		0.525	0.593	0.628		0.615	0.588	0.72		0.504
166	1.114				1.283				1.066				1.12				1.066				0.785				0.734					166	0.221		0.27	0.317	0.99		0.452	0.511	0.563		0.525	0.592	0.631		0.611	0.586	0.715		0.508
166.25	1.116				1.286				1.067				1.118				1.067				0.785				0.729					166.25	0.219		0.269	0.318	0.992		0.449	0.508	0.563		0.529	0.592	0.633		0.619	0.589	0.725		0.505
166.5	1.111				1.286				1.066				1.12				1.067				0.789				0.726					166.5	0.222				0.995				0.561				0.631				0.729
166.75	1.112				1.283				1.071				1.121				1.069				0.785				0.725					166.75	0.222				1				0.565				0.634				0.728
[truncated: 31 more columns]

## Sheet: Fig_5
	under LL50
genotype	LT								pam68_S113G											LT	pam68_S113G
replicate #	1	2	3	4	5	6	7	8	1	2	3	4	5	6	7	8			Av	1.60675	2.78		1.7302
final OD730nm	1.634	1.611	1.642	1.681	1.594	1.579	1.52	1.593	2.7	2.65	2.78	2.92	2.78	2.86	2.72	2.83			SD	0.0480528	0.0889623
																			t-test p value		3.87838e-12
	under FL0
genotype	LT								pam68_S113G											LT	pam68_S113G
replicate #	1	2	3	4	5	6	7	8	1	2	3	4	5	6	7	8			Av	0.242	0.591		2.44215
final OD730nm	0.234	0.228	0.246	0.242	0.28	0.266	0.208	0.232	0.548	0.532	0.596	0.586	0.54	0.542	0.7	0.684			SD	0.0225262	0.066453
																			t-test p value		3.16108e-07

## Sheet: Fig_5A_blots
Rep1												Rep1												Rep1													Rep2												Rep2
under LL50						under FL0						under LL50						under FL0						under LL50						under FL0							under LL50						under HL700						under LL50
PAM68												PsaA												PsbA													PAM68												PsaA
overlay signal												overlay signal												overlay signal													overlay signal												overlay signal
CBB signal												EF-G2 (re-blotting after PsaA)												AtpB (re-blotting after PsbA)													AtpB (re-blotting after PAM68)												PsbA (re-blotting after PsaA)
												CBB signal												CBB signal													CBB signal												CBB signal
APC+PC (fluo)
												APC+PC (fluo)												APC+PC (fluo)													APC+PC (fluo)												APC+PC (fluo)

## Sheet: Fig_5B
Signal quantification LL50																				Signal quantification FL0
		Transposed																				Transposed
		PAM68		PsbA		PsaA		AtpB		APC+PC												PAM68		PsbA		PsaA		AtpB		APC+PC
		LT	pam68_S113G	LT	pam68_S113G	LT	pam68_S113G	LT	pam68_S113G	LT	pam68_S113G											LT	pam68_S113G	LT	pam68_S113G	LT	pam68_S113G	LT	pam68_S113G	LT	pam68_S113G
		17134.4	9299.4	16943	15212.6	17482.3	9628.03	14209.2	14385.4	18024.1	25168											17622	9925.76	10841.1	13153.7	13153.8	16422.7	15940	16283.9	24537	21746.1
		16366.9	11772.9	15104.5	15577.7	15995.8	10973.2	15408.9	14441.9	19516.8	23427											13392.9	12206	9490.15	14365.2	13023.2	16574.2	15631.2	16225	26900.2	23887.7
		11357.5	15512	13061.6	14738.3	13340.4	12861.8	12724.6	14451.6	22200.6	29555.5											13111.1	11123.8	10156	16080.9	12908.7	14094.5	16051.8	15774.4	28400.8	22769.3
		11036.2	14595.4	13639	16059.5	10424.1	12534.6	13326.2	16417.2	25539.7	28152.1											13605.4	12017.1	10083.8	15757.5	12017.3	15477.7	16704.9	16563.9	23945.1	20652.4
		15559.5	9335.4	16570.8	15564.6	15945	12015.7	15401.4	12620	21246.5	26576.2											12025.2		12570.3	15897.8	14177.5	17846	18588.8	15982.2	25263.9	24427.3
		11061.9	10830.8	14400.4	15461.4	15030.4	13685	13788.6	13772.3	21354	23413.6											9990.17	10589.4	9763.1	12319	14213.3	15494	17254.6	15338.9	27901.5	26203.3
		8013.76	13598.9	15390.4	15951.7	13723.2	15376.3	13355.6	16480.2	23585	29742.8											10381.2	8756.1	11438.3	13363.6	14686.7	15668.3	14744.4	13677.4	29805.6	24211.1
		7596.74	14512.9	12812	17287	12390.3	17171.1	13498.4	17826.6	26404.6	27698.4											13182.6	10772.8	11631.4	15371.7	14331.8	14227.6	13213.2	16696.6	25784.7	22219.8
										21067.5	25636.6																			24774.3	28497.6
										21114.3	22944.3																			26197.8	23659.3
										26659.7	29806																			28244.3	22598.6
										28022.3	26075																			24216.3	20808.2
										17593.6	23628.9																			25864.4	27716.2
										17745.1	21477.2																			27126.7	24231.9
										22858	29122.7																			29104.1	23731.5
										25428.7	24840.3																			24750.2	22596.2
										19902.6	23676.5																			26425.8	27215.5
										19453.8	20571.9																			27251.9	25537.3
										25454.1	27992.6																			29367.2	25614.7
										26564.7	24571.2																			24819.2	22853.1
t test p value:																				t test p value:
*** p≤0.001	Average	12265.9	12432.2	14740.2	15731.6	14291.4	13030.7	13964.1	15049.4	22486.8	25703.8									*** p≤0.001	Average	12913.8	10770.2	10746.8	14538.7	13564	15725.6	16016.1	15817.8	26534	24058.9
** p≤0.01	SD	3446.69	2298.34	1441.46	703.198	2126.17	2241.35	920.23	1594.17	3209.36	2727.23									** p≤0.01	SD	2200.48	1104.77	995.615	1353.74	860.997	1157.84	1510.6	904.946	1769.82	2133.34
* p≤0.05	% to LT		1.01356		1.06726		0.911785		1.07772		1.14306									* p≤0.05	% to LT		0.834003		1.35284		1.15936		0.987618		0.906717
insignificant	p (t test)		0.916899		0.12423		0.298532		0.141092		0.00194261									insignificant	p (t test)		0.0489589		3.42648e-05		0.00141343		0.770118		0.000388172
	Median																				Median
	Q1																				Q1
	Q3																				Q3
	1.5×IQR																				1.5×IQR
	All replicates																				All replicates
		PAM68			PsbA			PsaA			AtpB			APC+PC (fluo)								PAM68			PsbA			PsaA			AtpB			APC+PC (fluo)
	#	1	2		1	2		1	2		1	2		1	2	3	4	5			#	1	2		1	2		1	2		1	2		1	2	3	4	5
	LT_A	17134.4	15559.5		16943	16570.8		17482.3	15945		14209.2	15401.4		18024.1	21246.5	21067.5	17593.6	19902.6			LT_A	17622	12025.2		10841.1	12570.3		13153.8	14177.5		15940	18588.8		24537	25263.9	24774.3	25864.4	26425.8
	LT_B	16366.9	11061.9		15104.5	14400.4		15995.8	15030.4		15408.9	13788.6		19516.8	21354	21114.3	17745.1	19453.8			LT_B	13392.9	9990.17		9490.15	9763.1		13023.2	14213.3		15631.2	17254.6		26900.2	27901.5	26197.8	27126.7	27251.9
	LT_C	11357.5	8013.76		13061.6	15390.4		13340.4	13723.2		12724.6	13355.6		22200.6	23585	26659.7	22858	25454.1			LT_C	13111.1	10381.2		10156	11438.3		12908.7	14686.7		16051.8	14744.4		28400.8	29805.6	28244.3	29104.1	29367.2
	LT_D	11036.2	7596.74		13639	12812		10424.1	12390.3		13326.2	13498.4		25539.7	26404.6	28022.3	25428.7	26564.7			LT_D	13605.4	13182.6		10083.8	11631.4		12017.3	14331.8		16704.9	13213.2		23945.1	25784.7	24216.3	24750.2	24819.2
	pam68_S113G_A	9299.4	9335.4		15212.6	15564.6		9628.03	12015.7		14385.4	12620		25168	26576.2	25636.6	23628.9	23676.5			pam68_S113G_A	9925.76			13153.7	15897.8		16422.7	17846		16283.9	15982.2		21746.1	24427.3	28497.6	27716.2	27215.5
	pam68_S113G_B	11772.9	10830.8		15577.7	15461.4		10973.2	13685		14441.9	13772.3		23427	23413.6	22944.3	21477.2	20571.9			pam68_S113G_B	12206	10589.4		14365.2	12319		16574.2	15494		16225	15338.9		23887.7	26203.3	23659.3	24231.9	25537.3
	pam68_S113G_C	15512	13598.9		14738.3	15951.7		12861.8	15376.3		14451.6	16480.2		29555.5	29742.8	29806	29122.7	27992.6			pam68_S113G_C	11123.8	8756.1		16080.9	13363.6		14094.5	15668.3		15774.4	13677.4		22769.3	24211.1	22598.6	23731.5	25614.7
	pam68_S113G_D	14595.4	14512.9		16059.5	17287		12534.6	17171.1		16417.2	17826.6		28152.1	27698.4	26075	24840.3	24571.2			pam68_S113G_D	12017.1	10772.8		15757.5	15371.7		15477.7	14227.6		16563.9	16696.6		20652.4	22219.8	20808.2	22596.2	22853.1
		Ratio	Ratio	Average	Ratio	Ratio	Average	Ratio	Ratio	Average	Ratio	Ratio	Average	Ratio	Ratio	Ratio	Ratio	Ratio	Average			Ratio	Ratio	Average	Ratio	Ratio	Average	Ratio	Ratio	Average	Ratio	Ratio	Average	Ratio	Ratio	Ratio	Ratio	Ratio	Average
		1.00003	1.00003	1.00003	0.999997	0.999988	0.999993	1.00002	0.999999	1.00001	1.00002	1.00003	1.00002	1.00001	0.999978	0.999978	0.999977	0.999979	0.999984			0.999998	1.00001	1.00001	1.00001	1.00002	1.00002	0.999986	0.999966	0.999976	1	0.999987	0.999994	0.999998	0.999996	1.00001	1.00001	0.999994	1
		0.95523	0.710962	0.833096	0.89149	0.869012	0.880251	0.914987	0.94264	0.928814	1.08444	0.895303	0.989874	1.08282	1.00504	1.0022	1.00859	0.977429	1.01521			0.760008	0.830784	0.795396	0.875395	0.776699	0.826047	0.990053	1.00249	0.99627	0.980628	0.928214	0.954421	1.09631	1.1044	1.05747	1.04882	1.03125	1.06765
		0.662866	0.515056	0.588961	0.770917	0.928758	0.849837	0.763093	0.860656	0.811874	0.895529	0.867188	0.881359	1.23172	1.11004	1.26541	1.29919	1.27891	1.23706			0.744019	0.863304	0.803661	0.936817	0.909966	0.923392	0.981355	1.03588	1.00862	1.00701	0.793181	0.900097	1.15747	1.17977	1.14008	1.12527	1.1113	1.14278
		0.644108	0.488254	0.566181	0.804995	0.773157	0.789076	0.596276	0.777067	0.686671	0.937871	0.876462	0.907167	1.41698	1.24274	1.33009	1.44531	1.33471	1.35397			0.77207	1.09626	0.934167	0.930155	0.92533	0.927742	0.913583	1.01085	0.962216	1.04798	0.710809	0.879396	0.975878	1.02061	0.977488	0.956935	0.939195	0.974022
		0.542745	0.6	0.571373	0.897872	0.93927	0.918571	0.55074	0.753574	0.652157	1.01241	0.819426	0.91592	1.39636	1.25082	1.21685	1.34301	1.18959	1.27933			0.56326		0.56326	1.21333	1.26474	1.23903	1.24849	1.25871	1.2536	1.02157	0.859767	0.94067	0.886256	0.966882	1.1503	1.07161	1.02988	1.02099
		0.687106	0.696112	0.691609	0.919417	0.933042	0.92623	0.627683	0.858262	0.742972	1.01639	0.894246	0.955317	1.29977	1.10197	1.08906	1.22071	1.03361	1.14902			0.692656	0.880619	0.786638	1.32508	0.980034	1.15256	1.26001	1.09282	1.17642	1.01788	0.825162	0.92152	0.973538	1.03718	0.955005	0.936896	0.966369	0.973798
		0.905333	0.874024	0.889679	0.869875	0.962626	0.91625	0.735717	0.964337	0.850027	1.01707	1.07007	1.04357	1.63979	1.39986	1.41475	1.65526	1.40645	1.50322			0.631246	0.728158	0.679702	1.48334	1.06313	1.27323	1.0715	1.10512	1.08831	0.989614	0.735782	0.862698	0.927958	0.958325	0.91219	0.917548	0.9693	0.937064
		0.851837	0.932767	0.892302	0.947857	1.04321	0.995534	0.717	1.07689	0.896946	1.15541	1.1575	1.15645	1.56192	1.30364	1.23766	1.41186	1.23455	1.34993			0.681939	0.89587	0.788904	1.45351	1.22289	1.3382	1.17665	1.0035	1.09008	1.03914	0.8982	0.968671	0.841685	0.879506	0.839923	0.873656	0.864797	0.859913

## Sheet: Fig_5C
		under LL50		under FL0		under LL50		under FL0					under LL50		under FL0		under LL50		under FL0
		LT	pam68_S113G	LT	pam68_S113G	LT	pam68_S113G	LT	pam68_S113G				LT	pam68_S113G	LT	pam68_S113G	LT	pam68_S113G	LT	pam68_S113G
		replicate 1	replicate 1	replicate 1	replicate 1	replicate 2	replicate 2	replicate 2	replicate 2				replicate 1	replicate 1	replicate 1	replicate 1	replicate 2	replicate 2	replicate 2	replicate 2

## Sheet: Ext_Fig_5
	LT	pam68_S113G	LT	pam68_S113G
	replicate 1	replicate 1	replicate 2	replicate 2

[truncated: 5 more sheets: Ext_Fig_6A, Ext_Fig_6B, Ext_Fig_6C, Ext_Fig_6D, Ext_Fig_6E]
