# Supplementary material
Source: Research Square preprint supplement (doi:10.21203/rs.3.rs-6305715/v1)
Supplement: Supplementary file 7 [file ae5755f42b27b147f8178efa.xlsx]

## Sheet: description
Supplemental Data 3. Frequency of total mutations in FL-ALE and HL-ALE experiments assigned to nine bins.
Refers to Extended Data Fig. 1c

## Sheet: Ext Fig 1C FL-ALE
							novel mutation count discriminated by allele frequency
position	mutation	annotation	locus	function	in FL0	in FL+	5-10	10-15	15-30	30-45	45-60	60-75	75-90	90-99	100
72086	Δ150 bp	intergenic (+2318/+643)	slr7076 → / ← sll7077	ORF_ID:slr7076; hypothetical protein/ORF_ID:sll7077; hypothetical protein	YES	YES	0	0	0	0	0	0	0	0	24
335959	T→C	S113G (AGC→GGC)	sll0933 ←	ORF_ID:sll0933; unknown protein	YES	YES	0	0	0	0	0	0	0	0	24
3181140	G→A	A133V (GCC→GTC)	sll0518 ←	ORF_ID:sll0518; unknown protein	YES	YES	0	0	0	0	0	0	0	0	24
3323561	G→T	R96L (CGT→CTT)	rpoDI →	RNA polymerase sigma factor	YES	YES	0	0	0	0	0	0	0	0	24
68609	Δ77 bp	intergenic (‑633/‑694)	sll7075 ← / → slr7076	unknown protein/ORF_ID:slr7076; hypothetical protein	YES	YES	0	0	0	0	0	0	0	0	23
70740	Δ77 bp	intergenic (+972/+2062)	slr7076 → / ← sll7077	ORF_ID:slr7076; hypothetical protein/ORF_ID:sll7077; hypothetical protein	YES	YES	0	0	0	0	0	0	0	0	23
1999008	A→T	Q183H (CAA→CAT)	nadC →	nicotinate‑nucleotide pyrophosphorylase	YES	YES	0	0	0	0	0	0	0	0	16
17222	Δ935 bp	Δ935 bp	ssr7018–[ssl7019]	ssr7018, [ssl7019]	YES	YES	0	0	0	0	0	0	0	0	6
589750	T→C	A841A (GCT→GCC)	slr2046 →	Fat protein	NO	YES	0	0	0	0	0	0	0	0	3
858495	G→T	T791N (ACC→AAC)	rpoB ←	RNA polymerase beta subunit	NO	YES	0	0	0	0	0	0	0	0	3
1415635	A→G	T504A (ACC→GCC)	topA →	DNA topoisomerase I	NO	YES	0	0	0	0	0	0	0	0	3
2013327	A→C	T183P (ACC→CCC)	slr0947 →	OmpR subfamily	NO	YES	0	0	0	0	0	0	0	0	3
2013361	A→G	D194G (GAC→GGC)	slr0947 →	OmpR subfamily	NO	YES	0	0	0	0	0	0	0	0	3
125267	T→C	T393A (ACC→GCC)	dfr ←	drug sensory protein A	NO	YES	0	0	0	0	0	0	0	0	2
530947	A→T	W97R (TGG→AGG)	sll1647 ←	ORF_ID:sll1647; hypothetical protein	NO	YES	0	0	0	0	0	0	0	0	2
727349	A→G	S40P (TCT→CCT)	cpcB ←	phycocyanin b subunit	NO	YES	0	0	0	0	0	0	0	0	2
1414572	A→T	E149D (GAA→GAT)	topA →	DNA topoisomerase I	NO	YES	0	0	0	0	0	0	0	0	2
1972593	A→G	intergenic (+44/‑16)	slr1683 → / → slr1684	transposase/transposase	NO	YES	0	0	0	0	0	0	0	0	2
3037493	G→C	V62L (GTT→CTT)	slr0315 →	ORF_ID:slr0315; hypothetical protein	NO	YES	0	0	0	0	0	0	0	0	2
3282	C→T	intergenic (+229/‑223)	slr6001 → / → ssr6002	two‑component hybrid sensor and regulator/ORF_ID:ssr6002	YES	NO	0	0	0	0	0	0	0	0	1
6306	A→G	intergenic (‑22/‑43)	sll7009 ← / → slr7010	unknown protein/unknown protein	NO	YES	0	0	0	0	0	0	0	0	1
39206	G→C	G71G (GGG→GGC)	slr5040 →	transposase	NO	YES	0	0	0	0	0	0	0	0	1
68609	191 bp→41 bp	intergenic (‑633/‑580)	sll7075 ← / → slr7076	unknown protein/ORF_ID:slr7076; hypothetical protein	NO	YES	0	0	0	0	0	0	0	0	1
70438	Δ75 bp	intergenic (+670/+2366)	slr7076 → / ← sll7077	ORF_ID:slr7076; hypothetical protein/ORF_ID:sll7077; hypothetical protein	NO	YES	0	0	0	0	0	0	0	0	1
124629	G→C	F605L (TTC→TTG)	dfr ←	drug sensory protein A	NO	YES	0	0	0	0	0	0	0	0	1
442494	Δ13 bp	coding (331‑343/1770 nt)	ycf45 →	ORF_ID:slr0692; hypothetical protein	NO	YES	0	0	0	0	0	0	0	0	1
443761	A→G	E533G (GAA→GGA)	ycf45 →	ORF_ID:slr0692; hypothetical protein	NO	YES	0	0	0	0	0	0	0	0	1
693714	C→T	V500M (GTG→ATG)	rnb ←	ribonuclease II	NO	YES	0	0	0	0	0	0	0	0	1
695220	C→A	intergenic (‑9/+70)	rnb ← / ← sll1289	ribonuclease II/ORF_ID:sll1289; unknown protein	YES	NO	0	0	0	0	0	0	0	0	1
832302	C→A	intergenic (‑37/+89)	adk ← / ← secY	adenylate kinase/preprotein translocase SecY subunit	NO	YES	0	0	0	0	0	0	0	0	1
1329229	A→G	noncoding (8/74 nt)	trnD‑GUC ←	trnD‑GUC	NO	YES	0	0	0	0	0	0	0	0	1
1413986	ISY100 (–) +2 bp	intergenic (+320/‑139)	apqZ → / → topA	water channel protein/DNA topoisomerase I	YES	NO	0	0	0	0	0	0	0	0	1
1432903	Δ4 bp	intergenic (‑5/+70)	prmA ← / ← serA	ribosomal protein L11 methyltransferase; PrmA/phosphoglycerate dehydrogenase	NO	YES	0	0	0	0	0	0	0	0	1
1854763	G→T	R221L (CGG→CTG)	rpoC1 →	RNA polymerase gamma‑subunit	NO	YES	0	0	0	0	0	0	0	0	1
1919875	A→G	intergenic (‑59/+38)	rps12 ← / ← sll1095	30S ribosomal protein S12/ORF_ID:sll1095; hypothetical protein	NO	YES	0	0	0	0	0	0	0	0	1
2000350	G→A	G292S (GGT→AGT)	slr0937 →	ORF_ID:slr0937; unknown protein	NO	YES	0	0	0	0	0	0	0	0	1
2010042	ISY523 (–) +3 bp	intergenic (‑38/‑174)	sll0914 ← / → slr0944	ORF_ID:sll0914; unknown protein/ORF_ID:slr0944; hypothetical protein	NO	YES	0	0	0	0	0	0	0	0	1
2453422	T→G	noncoding (254/1489 nt)	rrn16Sa ←	16S ribosomal RNA	YES	NO	0	0	0	0	0	0	0	0	1
2453429	T→C	noncoding (247/1489 nt)	rrn16Sa ←	16S ribosomal RNA	YES	NO	0	0	0	0	0	0	0	0	1
2453433	A→T	noncoding (243/1489 nt)	rrn16Sa ←	16S ribosomal RNA	YES	NO	0	0	0	0	0	0	0	0	1
2510428	G→C	Q290E (CAA→GAA)	sll0209 ←	ORF_ID:sll0209; hypothetical protein	NO	YES	0	0	0	0	0	0	0	0	1
2888839	G→T	R399L (CGG→CTG)	deaD →	ATP‑dependent RNA helicase; DeaD	NO	YES	0	0	0	0	0	0	0	0	1
3362629	Δ8 bp	coding (573‑580/1110 nt)	slr1557 →	ORF_ID:slr1557; unknown protein	NO	YES	0	0	0	0	0	0	0	0	1
442,222:1	+T	coding (59/1770 nt)	ycf45 →	ORF_ID:slr0692; hypothetical protein	NO	YES	0	0	0	0	0	0	0	0	1
2371584	A→T	L176H (CTC→CAC)	sphS ←	regulation of the phosphate regulon	YES	YES	5	3	1	0	0	0	0	0	0
3395730	T→G	intergenic (‑12/+33)	devB ← / ← sll1477	glucose‑6‑P‑dehydrogenase/ORF_ID:sll1477; unknown protein	YES	YES	9	1	0	0	0	0	0	0	0
49334	A→G	N182S (AAC→AGC)	slr7059 →	ORF_ID:slr7059; hypothetical protein	NO	YES	0	0	0	0	0	1	0	0	0
2594192	A→C	Q46H (CAA→CAC)	ribG →	riboflavin biosynthesis protein	YES	YES	3	4	0	0	0	0	0	0	0
3286904	C→G	E89Q (GAA→CAA)	sll1336 ←	ORF_ID:sll1336; hypothetical protein	YES	YES	6	2	0	0	0	0	0	0	0
1693782	G→A	Q294* (CAG→TAG)	sll0816 ←	ORF_ID:sll0816; hypothetical protein	NO	YES	0	0	0	0	0	1	0	0	0
871563	A→C	L570V (TTG→GTG)	sll1120 ←	chromosome segregation protein SMC1	YES	YES	0	2	2	0	0	0	0	0	0
83741	T→G	K38T (AAA→ACA)	sll1053 ←	ORF_ID:sll1053; hypothetical protein	YES	YES	8	0	0	0	0	0	0	0	0
3003517	A→C	E184D (GAA→GAC)	slr0121 →	ORF_ID:slr0121; unknown protein	YES	YES	5	1	0	0	0	0	0	0	0
17656	C→A	intergenic (+217/‑224)	ssr5011 → / → slr5012	ORF_ID:ssr5011; hypothetical protein/ORF_ID:slr5012; hypothetical protein	YES	YES	7	0	0	0	0	0	0	0	0
501571	A→T	H140Q (CAT→CAA)	sll1011 ←	ORF_ID:sll1011; hypothetical protein	YES	YES	7	0	0	0	0	0	0	0	0
2065848	G→T	intergenic (‑40/+153)	ssl2971 ← / ← prk	ORF_ID:ssl2971; unknown protein/phosphoribulokinase	YES	YES	0	2	1	0	0	0	0	0	0
2087759	A→C	intergenic (+26/+45)	slr0443 → / ← trnQ‑UUG	ORF_ID:slr0443; unknown protein/trnQ‑UUG	YES	YES	5	0	0	0	0	0	0	0	0
501596	T→G	N132T (AAC→ACC)	sll1011 ←	ORF_ID:sll1011; hypothetical protein	YES	NO	5	0	0	0	0	0	0	0	0
2657594	T→G	M1M (ATG→CTG) †	sll0611 ←	ORF_ID:sll0611; unknown protein	YES	YES	5	0	0	0	0	0	0	0	0
92723	C→A	L207F (TTG→TTT)	sll6098 ←	ORF_ID:sll6098; hypothetical protein	YES	YES	4	1	0	0	0	0	0	0	0
1820010	C→A	intergenic (‑13/+228)	psbA3 ← / ← sll1866	photosystem II D1 protein/ORF_ID:sll1866; hypothetical protein	NO	YES	1	2	0	0	0	0	0	0	0
86293	A→C	L45L (CTA→CTC)	crtX →	zeaxanthin glucosyl transferase	YES	YES	5	0	0	0	0	0	0	0	0
3534417	C→G	L192V (CTG→GTG)	argG →	argininosuccinate synthetase	NO	YES	0	0	0	1	0	0	0	0	0
1066022	T→G	R997R (AGG→CGG)	dnaX ←	DNA polymerase III subunit	YES	NO	5	0	0	0	0	0	0	0	0
1780485	T→G	M1R (ATG→AGG) †	slr1970 →	ORF_ID:slr1970; unknown protein	YES	YES	2	1	0	0	0	0	0	0	0
1178304	T→G	A2578A (GCT→GCG)	slr1403 →	ORF_ID:slr1403; integrin alpha‑ and beta4‑ subunit domain homologue	YES	YES	1	2	0	0	0	0	0	0	0
2713099	C→A	L69F (TTG→TTT)	sll0371 ←	ORF_ID:sll0371; unknown protein	YES	YES	4	0	0	0	0	0	0	0	0
1030834	T→G	L214V (TTG→GTG)	purC →	phosphoribosyl aminoidazole succinocarboxamide synthetase	YES	YES	1	2	0	0	0	0	0	0	0
1178289	T→G	V2573V (GTT→GTG)	slr1403 →	ORF_ID:slr1403; integrin alpha‑ and beta4‑ subunit domain homologue	YES	YES	5	0	0	0	0	0	0	0	0
501564	C→G	E143Q (GAA→CAA)	sll1011 ←	ORF_ID:sll1011; hypothetical protein	YES	YES	0	2	0	0	0	0	0	0	0
3491031	A→C	A157A (GCT→GCG)	sll0445 ←	ORF_ID:sll0445; unknown protein	YES	YES	3	0	0	0	0	0	0	0	0
1570385	A→C	E59D (GAA→GAC)	ftsY →	cell division protein; FtsY	YES	YES	4	0	0	0	0	0	0	0	0
2497890	T→G	S55R (AGT→AGG)	recG →	DNA recombinase	YES	YES	4	0	0	0	0	0	0	0	0
418522	C→A	A441E (GCA→GAA)	fmu_fmv →	Fmu and Fmv protein	NO	YES	2	1	0	0	0	0	0	0	0
106152	T→G	N74H (AAC→CAC)	ssl5114 ←	unknown protein	YES	YES	2	1	0	0	0	0	0	0	0
21261	A→G	P332P (CCA→CCG)	slr7023 →	ORF_ID:slr7023; hypothetical protein	YES	NO	0	0	1	0	0	0	0	0	0
190153	A→T	S41C (AGT→TGT)	slr1094 →	ORF_ID:slr1094; unknown protein	YES	YES	0	2	0	0	0	0	0	0	0
2993968	T→G	I155S (ATT→AGT)	slr0112 →	ORF_ID:slr0112; unknown protein	YES	YES	4	0	0	0	0	0	0	0	0
3271508	A→C	Q353P (CAG→CCG)	pyrD →	dihydroorotate dehydrogenase	NO	YES	0	2	0	0	0	0	0	0	0
1709429	T→G	V66V (GTT→GTG)	slr0820 →	glucosyltransferase	YES	YES	4	0	0	0	0	0	0	0	0
2714938	T→G	K584T (AAA→ACA)	carB ←	carbamoyl‑phosphate synthase, pyrimidine‑specific, large chain	YES	YES	4	0	0	0	0	0	0	0	0
1336429	C→A	P287T (CCT→ACT)	slr1747 →	ORF_ID:slr1747; hypothetical protein	NO	YES	2	1	0	0	0	0	0	0	0
2288418	C→A	G157G (GGC→GGA)	ndhD →	NADH dehydrogenase subunit 4	YES	YES	2	1	0	0	0	0	0	0	0
1771752	T→G	E164D (GAA→GAC)	hisF ←	cyclase	YES	YES	4	0	0	0	0	0	0	0	0
21260	C→T	P332L (CCA→CTA)	slr7023 →	ORF_ID:slr7023; hypothetical protein	YES	NO	0	0	1	0	0	0	0	0	0
1178322	T→G	T2584T (ACT→ACG)	slr1403 →	ORF_ID:slr1403; integrin alpha‑ and beta4‑ subunit domain homologue	NO	YES	3	0	0	0	0	0	0	0	0
62712	T→G	K707T (AAA→ACA)	sll5060 ←	two‑component hybrid sensor and regulator	YES	YES	4	0	0	0	0	0	0	0	0
2401150	A→C	Q79H (CAA→CAC)	secD →	protein‑export membrane protein; SecD	YES	YES	3	0	0	0	0	0	0	0	0
784869	T→A	V34D (GTC→GAC)	slr1134 →	ORF_ID:slr1134; hypothetical protein	YES	YES	3	0	0	0	0	0	0	0	0
2065853	C→A	intergenic (‑45/+148)	ssl2971 ← / ← prk	ORF_ID:ssl2971; unknown protein/phosphoribulokinase	YES	YES	3	0	0	0	0	0	0	0	0
1007860	T→G	Q129H (CAA→CAC)	nrtC ←	nitrate transport protein; NrtC	YES	YES	1	1	0	0	0	0	0	0	0
865764	A→C	I205S (ATT→AGT)	sll1124 ←	sensory transduction histidine kinase	YES	YES	3	0	0	0	0	0	0	0	0
21276	T→G	D337E (GAT→GAG)	slr7023 →	ORF_ID:slr7023; hypothetical protein	YES	NO	0	0	1	0	0	0	0	0	0
1796792	A→C	P225P (CCT→CCG)	sll1879 ←	ORF_ID:sll1879; unknown protein	YES	YES	3	0	0	0	0	0	0	0	0
1703520	T→A	K193M (AAG→ATG)	sll0809 ←	ORF_ID:sll0809; unknown protein	YES	YES	3	0	0	0	0	0	0	0	0
3355884	C→A	L993F (TTG→TTT)	gltB ←	ferredoxin‑dependent glutamate synthase	YES	YES	3	0	0	0	0	0	0	0	0
21273	G→A	V336V (GTG→GTA)	slr7023 →	ORF_ID:slr7023; hypothetical protein	YES	NO	0	0	1	0	0	0	0	0	0
2781751	C→A	Q117K (CAA→AAA)	slr0907 →	ORF_ID:slr0907; unknown protein	YES	YES	1	1	0	0	0	0	0	0	0
17668	C→A	intergenic (+229/‑212)	ssr5011 → / → slr5012	ORF_ID:ssr5011; hypothetical protein/ORF_ID:slr5012; hypothetical protein	YES	YES	3	0	0	0	0	0	0	0	0
1417347	T→G	L22V (TTA→GTA)	slr2060 →	ORF_ID:slr2060; unknown protein	YES	YES	3	0	0	0	0	0	0	0	0
2200966	T→G	intergenic (‑7/+181)	sll0142 ← / ← sll0141	cation or drug efflux system protein/ORF_ID:sll0141; hypothetical protein	NO	YES	3	0	0	0	0	0	0	0	0
527837	A→T	E1164D (GAA→GAT)	slr1753 →	ORF_ID:slr1753; unknown protein	NO	YES	0	0	1	0	0	0	0	0	0
630606	T→G	Q329H (CAA→CAC)	sll0998 ←	LysR transcriptional regulator	YES	YES	2	0	0	0	0	0	0	0	0
1520192	T→G	Q303H (CAA→CAC)	sll0245 ←	ORF_ID:sll0245; hypothetical protein	YES	YES	3	0	0	0	0	0	0	0	0
501607	C→G	Q128H (CAG→CAC)	sll1011 ←	ORF_ID:sll1011; hypothetical protein	YES	YES	1	1	0	0	0	0	0	0	0
996540	A→C	E422D (GAA→GAC)	lysS →	lysyl‑tRNA synthetase	YES	YES	2	0	0	0	0	0	0	0	0
470037	A→C	N149T (AAC→ACC)	slr1603 →	ORF_ID:slr1603; hypothetical protein	NO	YES	1	1	0	0	0	0	0	0	0
2263848	T→G	L8V (TTA→GTA)	lipB →	LipB protein	YES	YES	2	0	0	0	0	0	0	0	0
3569535	T→G	intergenic (+12/‑92)	slr0607 → / → hisI	ORF_ID:slr0607; unknown protein/phosphoribosyl‑ATP pyrophosphohydrolase:phosphoribosyl‑AMP cyclohydrolase	YES	YES	3	0	0	0	0	0	0	0	0
347715	A→C	L31R (CTT→CGT)	epsB ←	exopolysaccharide export protein	YES	YES	2	0	0	0	0	0	0	0	0
1428081	T→G	intergenic (‑430/+115)	sll1951 ← / ← sll1950	hemolysin/ORF_ID:sll1950; unknown protein	YES	YES	1	1	0	0	0	0	0	0	0
1599975	G→T	intergenic (‑437/‑684)	sll1418 ← / → slr1512	ORF_ID:sll1418; unknown protein/ORF_ID:slr1512; unknown protein	YES	YES	1	1	0	0	0	0	0	0	0
1773235	A→C	intergenic (‑32/‑111)	sll1892 ← / → slr1968	ORF_ID:sll1892; unknown protein/ORF_ID:slr1968; unknown protein	YES	YES	3	0	0	0	0	0	0	0	0
389827	T→G	N176T (AAC→ACC)	sll1025 ←	ORF_ID:sll1025; unknown protein	YES	YES	1	1	0	0	0	0	0	0	0
1449671	A→C	T538P (ACG→CCG)	slr2002 →	ORF_ID:slr2002; unknown protein	YES	YES	3	0	0	0	0	0	0	0	0
1709627	T→G	R132R (CGT→CGG)	slr0820 →	glucosyltransferase	YES	YES	3	0	0	0	0	0	0	0	0
2497884	T→G	P53P (CCT→CCG)	recG →	DNA recombinase	YES	YES	2	0	0	0	0	0	0	0	0
3283284	T→G	E41D (GAA→GAC)	sll1340 ←	ORF_ID:sll1340; unknown protein	YES	YES	3	0	0	0	0	0	0	0	0
2699474	T→G	A101A (GCT→GCG)	slr0420 →	ORF_ID:slr0420; unknown protein	YES	NO	2	0	0	0	0	0	0	0	0
190150	T→G	L40V (TTG→GTG)	slr1094 →	ORF_ID:slr1094; unknown protein	YES	NO	0	0	1	0	0	0	0	0	0
2128715	C→A	intergenic (+191/‑52)	slr0287 → / → glnN	ORF_ID:slr0287; unknown protein/glutamate‑‑ammonia ligase	YES	NO	2	0	0	0	0	0	0	0	0
1388637	C→A	intergenic (‑341/‑275)	norA ← / → pstS	quinolene resistance protein; NorA/periplasmic phosphate binding protein	YES	YES	2	0	0	0	0	0	0	0	0
614860	T→G	I7R (ATA→AGA)	slr1911 →	ORF_ID:slr1911; unknown protein	YES	YES	2	0	0	0	0	0	0	0	0
2868668	T→G	V251G (GTG→GGG)	slr0848 →	ORF_ID:slr0848; hypothetical protein	NO	YES	2	0	0	0	0	0	0	0	0
989034	T→G	T158P (ACG→CCG)	sll1464 ←	ORF_ID:sll1464; hypothetical protein	YES	YES	2	0	0	0	0	0	0	0	0
2507062	G→T	C311F (TGT→TTT)	slr0214 →	cytosine‑specific methyltransferase	YES	NO	2	0	0	0	0	0	0	0	0
2747639	A→C	Q12H (CAA→CAC)	slr0210 →	sensory transduction histidine kinase	YES	NO	2	0	0	0	0	0	0	0	0
2636881	G→T	Q250K (CAA→AAA)	pstB ←	phosphate transport ATP‑binding protein; PstB	YES	NO	2	0	0	0	0	0	0	0	0
156743	A→T	*91K (TAA→AAA)	ssl0410 ←	ORF_ID:ssl0410; unknown protein	YES	YES	2	0	0	0	0	0	0	0	0
3306453	G→T	T774N (ACC→AAC)	sll1366 ←	helicase of the snf2/rad54 family	YES	YES	2	0	0	0	0	0	0	0	0
297223	G→T	L716F (TTG→TTT)	slr1298 →	ORF_ID:slr1298; hypothetical protein	NO	YES	2	0	0	0	0	0	0	0	0
2909615	A→C	L63V (TTG→GTG)	sll0486 ←	ORF_ID:sll0486; PCC7942 clock gene...ORFE	YES	NO	2	0	0	0	0	0	0	0	0
1771734	T→G	A170A (GCA→GCC)	hisF ←	cyclase	NO	YES	2	0	0	0	0	0	0	0	0
1973978	A→C	L263R (CTA→CGA)	sll1559 ←	soluble hydrogenase 42 kD subunit	YES	YES	2	0	0	0	0	0	0	0	0
21198	G→T	E311D (GAG→GAT)	slr7023 →	ORF_ID:slr7023; hypothetical protein	YES	NO	0	1	0	0	0	0	0	0	0
3380463	A→C	M112L (ATG→CTG)	slr1570 →	ORF_ID:slr1570; unknown protein	YES	NO	2	0	0	0	0	0	0	0	0
1594826	C→A	G236G (GGC→GGA)	slr1508 →	ORF_ID:slr1508; unknown protein	NO	YES	0	1	0	0	0	0	0	0	0
527588	T→G	P1081P (CCT→CCG)	slr1753 →	ORF_ID:slr1753; unknown protein	YES	NO	0	1	0	0	0	0	0	0	0
1489195	A→C	Y118S (TAT→TCT)	slr1727 →	eukaryotic Na+/H+ exchanger	YES	NO	2	0	0	0	0	0	0	0	0
1695943	A→C	V285V (GTT→GTG)	sll0814 ←	ORF_ID:sll0814; unknown protein	YES	YES	2	0	0	0	0	0	0	0	0
989035	T→G	E157D (GAA→GAC)	sll1464 ←	ORF_ID:sll1464; hypothetical protein	YES	YES	2	0	0	0	0	0	0	0	0
1611274	T→G	V183G (GTT→GGT)	hglK →	HglK	YES	YES	2	0	0	0	0	0	0	0	0
3003503	A→C	T180P (ACG→CCG)	slr0121 →	ORF_ID:slr0121; unknown protein	YES	YES	2	0	0	0	0	0	0	0	0
56871	G→T	R313S (CGT→AGT)	sll5057 ←	ORF_ID:sll5057; probable glycosyltransferase	YES	YES	2	0	0	0	0	0	0	0	0
735170	A→C	P62P (CCA→CCC)	slr1708 →	lysostaphin	NO	YES	2	0	0	0	0	0	0	0	0
865785	A→C	L198R (CTG→CGG)	sll1124 ←	sensory transduction histidine kinase	YES	YES	2	0	0	0	0	0	0	0	0
2371603	T→G	R170R (AGG→CGG)	sphS ←	regulation of the phosphate regulon	YES	NO	0	1	0	0	0	0	0	0	0
21815	C→T	P517L (CCG→CTG)	slr7023 →	ORF_ID:slr7023; hypothetical protein	NO	YES	2	0	0	0	0	0	0	0	0
96439	G→T	E106* (GAA→TAA)	slr5101 →	ORF_ID:slr5101; hypothetical protein	YES	YES	2	0	0	0	0	0	0	0	0
2284277	A→C	T162P (ACG→CCG)	xylR →	xylose repressor	YES	YES	2	0	0	0	0	0	0	0	0
1417306	A→C	Q8P (CAA→CCA)	slr2060 →	ORF_ID:slr2060; unknown protein	YES	YES	2	0	0	0	0	0	0	0	0
365954	G→T	S80I (AGT→ATT)	slr1063 →	ORF_ID:slr1063; hypothetical protein	YES	NO	0	1	0	0	0	0	0	0	0
831484	C→A	L25F (TTG→TTT)	infA ←	initiation factor IF‑1	NO	YES	0	1	0	0	0	0	0	0	0
1570415	T→G	D69E (GAT→GAG)	ftsY →	cell division protein; FtsY	YES	YES	2	0	0	0	0	0	0	0	0
1793692	G→T	intergenic (‑84/‑160)	sll1882 ← / → slr1975	ORF_ID:sll1882; hypothetical protein/renin‑binding protein	YES	YES	2	0	0	0	0	0	0	0	0
3101375	T→G	E64D (GAA→GAC)	sll0672 ←	cation‑transporting ATPase; E1‑E2 ATPase	NO	YES	2	0	0	0	0	0	0	0	0
2498022	G→T	L99F (TTG→TTT)	recG →	DNA recombinase	YES	YES	2	0	0	0	0	0	0	0	0
2551155	A→T	S135C (AGC→TGC)	ccmK →	carbon dioxide concentrating mechanism protein; CcmK	YES	NO	0	1	0	0	0	0	0	0	0
21195	A→G	V310V (GTA→GTG)	slr7023 →	ORF_ID:slr7023; hypothetical protein	YES	NO	0	1	0	0	0	0	0	0	0
21809	C→T	S515L (TCG→TTG)	slr7023 →	ORF_ID:slr7023; hypothetical protein	NO	YES	2	0	0	0	0	0	0	0	0
1007846	T→G	K134T (AAA→ACA)	nrtC ←	nitrate transport protein; NrtC	NO	YES	0	1	0	0	0	0	0	0	0
11474	G→T	K159N (AAG→AAT)	slr8016 →	plasmid partitioning protein	YES	NO	0	1	0	0	0	0	0	0	0
3450391	G→T	G155V (GGA→GTA)	hlyB →	haemolysin secretion ATP‑binding protein	NO	YES	2	0	0	0	0	0	0	0	0
1514391	G→T	S316R (AGC→AGA)	dfp ←	pantothenate metabolism flavoprotein	YES	NO	0	1	0	0	0	0	0	0	0
92679	G→T	S222Y (TCC→TAC)	sll6098 ←	ORF_ID:sll6098; hypothetical protein	YES	YES	2	0	0	0	0	0	0	0	0
664693	A→C	L30V (TTG→GTG)	sll0986 ←	transposase	YES	YES	2	0	0	0	0	0	0	0	0
2360056	A→C	N2912H (AAC→CAC)	slr0364 →	ORF_ID:slr0364; unknown protein	YES	YES	2	0	0	0	0	0	0	0	0
96448	T→A	Y109N (TAC→AAC)	slr5101 →	ORF_ID:slr5101; hypothetical protein	YES	YES	2	0	0	0	0	0	0	0	0
3199322	A→C	I198L (ATC→CTC)	hemE →	uroporphyrinogen decarboxylase	YES	YES	2	0	0	0	0	0	0	0	0
1364997	T→A	D156V (GAT→GTT)	sll0837 ←	ORF_ID:sll0837; unknown protein	NO	YES	0	1	0	0	0	0	0	0	0
1634322	A→C	N301H (AAC→CAC)	slr2120 →	ORF_ID:slr2120; unknown protein	YES	YES	2	0	0	0	0	0	0	0	0
17623	C→A	intergenic (+184/‑257)	ssr5011 → / → slr5012	ORF_ID:ssr5011; hypothetical protein/ORF_ID:slr5012; hypothetical protein	NO	YES	2	0	0	0	0	0	0	0	0
278254	T→G	L609R (CTT→CGT)	slr1799 →	ORF_ID:slr1799; unknown protein	NO	YES	0	1	0	0	0	0	0	0	0
1972406	A→C	I85L (ATC→CTC)	slr1683 →	transposase	NO	YES	0	1	0	0	0	0	0	0	0
3442539	A→C	intergenic (‑695/+122)	sll0723 ← / ← sll0722	ORF_ID:sll0723; unknown protein/ORF_ID:sll0722; unknown protein	NO	YES	0	1	0	0	0	0	0	0	0
2987931	T→G	N227H (AAC→CAC)	sll0096 ←	ORF_ID:sll0096; unknown protein	NO	YES	0	1	0	0	0	0	0	0	0
1371729	T→G	W188G (TGG→GGG)	slr0872 →	ORF_ID:slr0872; unknown protein	YES	NO	2	0	0	0	0	0	0	0	0
2211058	C→A	intergenic (+130/‑225)	slr0166 → / → slr1923	transposase/ORF_ID:slr1923; hypothetical protein	YES	NO	0	1	0	0	0	0	0	0	0
3534864	G→A	V341M (GTG→ATG)	argG →	argininosuccinate synthetase	NO	YES	0	1	0	0	0	0	0	0	0
555586	T→G	L109V (TTG→GTG)	slr1847 →	ORF_ID:slr1847; hypothetical protein	NO	YES	0	1	0	0	0	0	0	0	0
1510868	T→A	A293A (GCT→GCA)	ndhH →	NADH dehydrogenase subunit 7	NO	YES	0	1	0	0	0	0	0	0	0
2404646	T→A	E108V (GAA→GTA)	rpl20 ←	50S ribosomal protein L20	NO	YES	2	0	0	0	0	0	0	0	0
2713053	G→T	L85I (CTT→ATT)	sll0371 ←	ORF_ID:sll0371; unknown protein	YES	NO	2	0	0	0	0	0	0	0	0
17647	G→T	intergenic (+208/‑233)	ssr5011 → / → slr5012	ORF_ID:ssr5011; hypothetical protein/ORF_ID:slr5012; hypothetical protein	YES	YES	2	0	0	0	0	0	0	0	0
2987934	G→T	Q226K (CAA→AAA)	sll0096 ←	ORF_ID:sll0096; unknown protein	NO	YES	0	1	0	0	0	0	0	0	0
36173	A→C	K1159T (AAG→ACG)	slr8038 →	WD‑repeat protein	NO	YES	0	1	0	0	0	0	0	0	0
1670664	G→T	G5G (GGG→GGT)	fabF →	beta ketoacyl‑acyl carrier protein synthase	NO	YES	0	1	0	0	0	0	0	0	0
3151491	T→G	M163L (ATG→CTG)	sll0041 ←	tsr or; CheD	YES	YES	2	0	0	0	0	0	0	0	0
2350805	T→A	L145Q (CTG→CAG)	slr0363 →	ORF_ID:slr0363; unknown protein	NO	YES	0	1	0	0	0	0	0	0	0
724422	A→C	intergenic (‑77/+70)	cpcD ← / ← cpcC	phycocyanin associated linker protein/phycocyanin associated linker protein	NO	YES	0	1	0	0	0	0	0	0	0
1773301	C→A	intergenic (‑98/‑45)	sll1892 ← / → slr1968	ORF_ID:sll1892; unknown protein/ORF_ID:slr1968; unknown protein	YES	NO	0	1	0	0	0	0	0	0	0
389818	T→G	Q179P (CAG→CCG)	sll1025 ←	ORF_ID:sll1025; unknown protein	YES	NO	1	0	0	0	0	0	0	0	0
527495	Δ24 bp	coding (3150‑3173/5250 nt)	slr1753 →	ORF_ID:slr1753; unknown protein	YES	NO	1	0	0	0	0	0	0	0	0
2942661	C→A	E75* (GAA→TAA)	sll0597 ←	ORF_ID:sll0597; hypothetical protein	YES	NO	1	0	0	0	0	0	0	0	0
3162779	C→A	A489S (GCC→TCC)	sll0033 ←	ORF_ID:sll0033; unknown protein	YES	NO	1	0	0	0	0	0	0	0	0
3154633	A→T	S10T (TCA→ACA)	sll0038 ←	PatA subfamily	NO	YES	1	0	0	0	0	0	0	0	0
923861	T→G	intergenic (‑22/+225)	rpl10 ← / ← rpl1	50S ribosomal protein L10/50S ribosomal protein L1	NO	YES	1	0	0	0	0	0	0	0	0
2551174	T→G	L141R (CTA→CGA)	ccmK →	carbon dioxide concentrating mechanism protein; CcmK	NO	YES	1	0	0	0	0	0	0	0	0
305454	T→G	L506V (TTG→GTG)	slr1301 →	ORF_ID:slr1301; unknown protein	NO	YES	1	0	0	0	0	0	0	0	0
1709428	T→G	V66G (GTT→GGT)	slr0820 →	glucosyltransferase	YES	NO	1	0	0	0	0	0	0	0	0
3185900	A→T	I390F (ATT→TTT)	murE →	UDP‑MurNac‑tripeptide synthetase	YES	NO	1	0	0	0	0	0	0	0	0
1451658	T→G	E287D (GAA→GAC)	sll1902 ←	ORF_ID:sll1902; hypothetical protein	NO	YES	1	0	0	0	0	0	0	0	0
17613	C→A	intergenic (+174/‑267)	ssr5011 → / → slr5012	ORF_ID:ssr5011; hypothetical protein/ORF_ID:slr5012; hypothetical protein	NO	YES	1	0	0	0	0	0	0	0	0
2347854	C→A	L686F (TTG→TTT)	sll0350 ←	ORF_ID:sll0350; unknown protein	NO	YES	1	0	0	0	0	0	0	0	0
2781745	G→T	D115Y (GAT→TAT)	slr0907 →	ORF_ID:slr0907; unknown protein	NO	YES	1	0	0	0	0	0	0	0	0
3319419	T→G	L47V (TTG→GTG)	hisA →	phosphorybosilformimino‑5‑amino‑phosphorybosil‑ 4‑imidazolecarboxamideisomerase	NO	YES	1	0	0	0	0	0	0	0	0
331716	A→C	Q191H (CAA→CAC)	cbiH →	precorrin methylase	YES	NO	1	0	0	0	0	0	0	0	0
630595	T→G	K333T (AAG→ACG)	sll0998 ←	LysR transcriptional regulator	NO	YES	1	0	0	0	0	0	0	0	0
1796780	A→C	S229R (AGT→AGG)	sll1879 ←	ORF_ID:sll1879; unknown protein	YES	NO	1	0	0	0	0	0	0	0	0
20504	G→T	G189G (GGG→GGT)	slr8023 →	ORF_ID:slr8023; probable esterase	NO	YES	1	0	0	0	0	0	0	0	0
3238625	G→T	Q82K (CAA→AAA)	sll0896 ←	Holliday juction resolvase; RuvC	NO	YES	1	0	0	0	0	0	0	0	0
1559546	A→C	V22V (GTT→GTG)	trxA ←	thiol:disulfide interchange protein; TrxA	YES	NO	1	0	0	0	0	0	0	0	0
576469	A→C	P145P (CCT→CCG)	sll1942 ←	ORF_ID:sll1942; unknown protein	NO	YES	1	0	0	0	0	0	0	0	0
92740	A→C	L202V (TTG→GTG)	sll6098 ←	ORF_ID:sll6098; hypothetical protein	YES	NO	1	0	0	0	0	0	0	0	0
347692	T→A	R39W (AGG→TGG)	epsB ←	exopolysaccharide export protein	NO	YES	1	0	0	0	0	0	0	0	0
969966	G→T	T285T (ACC→ACA)	hisC ←	histidinol‑phosphate aminotransferase	YES	NO	1	0	0	0	0	0	0	0	0
27416	C→A	T199T (ACG→ACT)	ndhK2 ←	NADH dehydrogenase subunit	YES	NO	1	0	0	0	0	0	0	0	0
37628	T→G	S171R (AGT→CGT)	sll7043 ←	unknown protein	NO	YES	1	0	0	0	0	0	0	0	0
44341	G→T	A257A (GCG→GCT)	fecB →	iron(III) dicitrate‑binding periplasmic protein	NO	YES	1	0	0	0	0	0	0	0	0
1066233	T→G	E926D (GAA→GAC)	dnaX ←	DNA polymerase III subunit	YES	NO	1	0	0	0	0	0	0	0	0
1417320	T→G	F13V (TTT→GTT)	slr2060 →	ORF_ID:slr2060; unknown protein	NO	YES	1	0	0	0	0	0	0	0	0
2430134	C→A	Q198K (CAA→AAA)	rfbW →	mannosyl transferase	NO	YES	1	0	0	0	0	0	0	0	0
1780484	A→C	M1M (ATG→CTG) †	slr1970 →	ORF_ID:slr1970; unknown protein	YES	NO	1	0	0	0	0	0	0	0	0
489325	A→C	K680T (AAA→ACA)	slr1609 →	long‑chain‑fatty‑acid CoA ligase	NO	YES	1	0	0	0	0	0	0	0	0
1611385	T→A	L220Q (CTG→CAG)	hglK →	HglK	YES	NO	1	0	0	0	0	0	0	0	0
2297457	C→A	A372S (GCC→TCC)	sll0294 ←	ORF_ID:sll0294; unknown protein	YES	NO	1	0	0	0	0	0	0	0	0
2547012	T→G	K6Q (AAG→CAG)	sll0410 ←	ORF_ID:sll0410; unknown protein	YES	NO	1	0	0	0	0	0	0	0	0
831493	G→T	F22L (TTC→TTA)	infA ←	initiation factor IF‑1	YES	NO	1	0	0	0	0	0	0	0	0
1275437	G→T	P241T (CCT→ACT)	sll1710 ←	transposase	NO	YES	1	0	0	0	0	0	0	0	0
1482024	T→A	S47C (AGT→TGT)	mntA ←	Mn transporter; MntA	NO	YES	1	0	0	0	0	0	0	0	0
2987971	T→G	Q213H (CAA→CAC)	sll0096 ←	ORF_ID:sll0096; unknown protein	NO	YES	1	0	0	0	0	0	0	0	0
489322	T→A	L679H (CTC→CAC)	slr1609 →	long‑chain‑fatty‑acid CoA ligase	NO	YES	1	0	0	0	0	0	0	0	0
577060	A→T	N903K (AAT→AAA)	gyrA ←	DNA gyrase A subunit	NO	YES	1	0	0	0	0	0	0	0	0
1591662	T→G	F389L (TTT→TTG)	slr1506 →	ORF_ID:slr1506; unknown protein	NO	YES	1	0	0	0	0	0	0	0	0
372792	G→T	intergenic (+283/‑19)	galE → / → slr1068	UDP‑glucose‑4‑epimerase/ORF_ID:slr1068; unknown protein	YES	NO	1	0	0	0	0	0	0	0	0
553008	C→A	intergenic (‑141/+57)	sll1635 ← / ← psbK	ORF_ID:sll1635; Thy1 protein homologue/photosystem II PsbK protein	NO	YES	1	0	0	0	0	0	0	0	0
2404654	A→C	A105A (GCT→GCG)	rpl20 ←	50S ribosomal protein L20	NO	YES	1	0	0	0	0	0	0	0	0
2911607	A→C	F85V (TTT→GTT)	sll0484 ←	ABC transporter	NO	YES	1	0	0	0	0	0	0	0	0
1823447	T→G	intergenic (‑8/‑123)	trnR‑ACG ← / → petG	trnR‑ACG/PetG subunit of the cytochrome b6f complex	YES	NO	1	0	0	0	0	0	0	0	0
1388614	G→T	intergenic (‑318/‑298)	norA ← / → pstS	quinolene resistance protein; NorA/periplasmic phosphate binding protein	NO	YES	1	0	0	0	0	0	0	0	0
1438340	C→A	T323N (ACC→AAC)	thl →	acetyl coenzyme A acetyltransferase (thiolase)	YES	NO	1	0	0	0	0	0	0	0	0
1907639	C→A	E36* (GAA→TAA)	sll1433 ←	ORF_ID:sll1433; hypothetical protein	NO	YES	1	0	0	0	0	0	0	0	0
2035618	T→G	L49V (TTA→GTA)	slr1624 →	ORF_ID:slr1624; unknown protein	NO	YES	1	0	0	0	0	0	0	0	0
3067121	G→T	A125S (GCC→TCC)	slr0800 →	transposase	YES	NO	1	0	0	0	0	0	0	0	0
527672	T→C	P1109P (CCT→CCC)	slr1753 →	ORF_ID:slr1753; unknown protein	YES	NO	1	0	0	0	0	0	0	0	0
1275418	A→T	M247K (ATG→AAG)	sll1710 ←	transposase	NO	YES	1	0	0	0	0	0	0	0	0
1513955	G→C	S244T (AGT→ACT)	slr0265 →	transposase	YES	NO	1	0	0	0	0	0	0	0	0
1796782	T→G	S229R (AGT→CGT)	sll1879 ←	ORF_ID:sll1879; unknown protein	YES	NO	1	0	0	0	0	0	0	0	0
1974032	A→T	I245N (ATC→AAC)	sll1559 ←	soluble hydrogenase 42 kD subunit	NO	YES	1	0	0	0	0	0	0	0	0
1123506	G→T	Q176K (CAA→AAA)	sll1267 ←	ORF_ID:sll1267; unknown protein	YES	NO	1	0	0	0	0	0	0	0	0
1144595	C→A	intergenic (+364/‑133)	slr0882 → / → psr	ORF_ID:slr0882; unknown protein/regulation of penicillin binding protein 5 production	NO	YES	1	0	0	0	0	0	0	0	0
1364962	G→T	P168T (CCC→ACC)	sll0837 ←	ORF_ID:sll0837; unknown protein	YES	NO	1	0	0	0	0	0	0	0	0
1405598	A→C	S55R (AGC→CGC)	slr1261 →	ORF_ID:slr1261; hypothetical protein	NO	YES	1	0	0	0	0	0	0	0	0
1594775	G→T	W219C (TGG→TGT)	slr1508 →	ORF_ID:slr1508; unknown protein	NO	YES	1	0	0	0	0	0	0	0	0
1764138	A→C	Y138S (TAT→TCT)	slr1962 →	ORF_ID:slr1962; unknown protein	YES	NO	1	0	0	0	0	0	0	0	0
2550585	T→G	intergenic (+62/‑168)	accB → / → ccmK	biotin carboxyl carrier protein of acetyl‑CoA carboxylase/carbon dioxide concentrating mechanism protein; CcmK	YES	NO	1	0	0	0	0	0	0	0	0
81579	C→A	G214G (GGC→GGA)	slr1122 →	ORF_ID:slr1122; unknown protein	NO	YES	1	0	0	0	0	0	0	0	0
96458	G→T	G112V (GGA→GTA)	slr5101 →	ORF_ID:slr5101; hypothetical protein	YES	NO	1	0	0	0	0	0	0	0	0
1375780	G→T	D144Y (GAT→TAT)	slr1243 →	ORF_ID:slr1243; unknown protein	NO	YES	1	0	0	0	0	0	0	0	0
1393381	A→T	E137V (GAA→GTA)	cyp →	peptidyl‑prolyl cis‑trans isomerase	YES	NO	1	0	0	0	0	0	0	0	0
3147633	T→G	Q263H (CAA→CAC)	sll0043 ←	CheA like protein	YES	NO	1	0	0	0	0	0	0	0	0
3342594	T→G	intergenic (‑152/‑263)	sll0624 ← / → speA	ORF_ID:sll0624; unknown protein/arginine decarboxylase	NO	YES	1	0	0	0	0	0	0	0	0
1375727	G→T	G126V (GGA→GTA)	slr1243 →	ORF_ID:slr1243; unknown protein	NO	YES	1	0	0	0	0	0	0	0	0
1519435	G→T	V108F (GTT→TTT)	slr0267 →	ORF_ID:slr0267; hypothetical protein	YES	NO	1	0	0	0	0	0	0	0	0
2551178	G→T	L142F (TTG→TTT)	ccmK →	carbon dioxide concentrating mechanism protein; CcmK	YES	NO	1	0	0	0	0	0	0	0	0
715293	T→G	E287D (GAA→GAC)	lig ←	DNA ligase	NO	YES	1	0	0	0	0	0	0	0	0
1381056	T→G	R279R (AGG→CGG)	sll1161 ←	adenylate cyclase	NO	YES	1	0	0	0	0	0	0	0	0
1680156	G→T	intergenic (+352/‑506)	ssr2227 → / → slr1334	transposase/ORF_ID:slr1334; unknown protein	YES	NO	1	0	0	0	0	0	0	0	0
1703572	G→T	Q176K (CAA→AAA)	sll0809 ←	ORF_ID:sll0809; unknown protein	YES	NO	1	0	0	0	0	0	0	0	0
1920020	C→A	V177F (GTC→TTC)	sll1095 ←	ORF_ID:sll1095; hypothetical protein	YES	NO	1	0	0	0	0	0	0	0	0
2927765	T→A	K646* (AAG→TAG)	sll0474 ←	sensory transduction histidine kinase	YES	NO	1	0	0	0	0	0	0	0	0
106798	C→A	L88I (CTA→ATA)	slr5115 →	ORF_ID:slr5115; hypothetical protein	NO	YES	1	0	0	0	0	0	0	0	0
190160	A→T	E43V (GAG→GTG)	slr1094 →	ORF_ID:slr1094; unknown protein	NO	YES	1	0	0	0	0	0	0	0	0
321742	T→G	V15G (GTA→GGA)	sir →	ferredoxin‑sulfite reductase	YES	NO	1	0	0	0	0	0	0	0	0
501602	T→G	N130T (AAC→ACC)	sll1011 ←	ORF_ID:sll1011; hypothetical protein	YES	NO	1	0	0	0	0	0	0	0	0
815288	G→T	S497I (AGT→ATT)	slr1149 →	ABC transporter	YES	NO	1	0	0	0	0	0	0	0	0
1832615	C→A	Q86K (CAA→AAA)	slr1474 →	ORF_ID:slr1474; unknown protein	YES	NO	1	0	0	0	0	0	0	0	0
2039568	C→A	L10I (CTC→ATC)	slr1627 →	ORF_ID:slr1627; hypothetical protein	YES	NO	1	0	0	0	0	0	0	0	0
2371611	A→C	I167S (ATT→AGT)	sphS ←	regulation of the phosphate regulon	YES	NO	1	0	0	0	0	0	0	0	0
2733752	A→C	Q224H (CAA→CAC)	hdrB →	heterodisulfide reductase subunit B	NO	YES	1	0	0	0	0	0	0	0	0
297208	G→T	L711F (TTG→TTT)	slr1298 →	ORF_ID:slr1298; hypothetical protein	NO	YES	1	0	0	0	0	0	0	0	0
1427050	A→C	L201R (CTA→CGA)	sll1951 ←	hemolysin	NO	YES	1	0	0	0	0	0	0	0	0
1595795	G→T	A171S (GCC→TCC)	ntpJ →	Na+ ‑ATPase subunit J	YES	NO	1	0	0	0	0	0	0	0	0
3195783	T→G	G595G (GGT→GGG)	slt →	soluble lytic transglycosylase	NO	YES	1	0	0	0	0	0	0	0	0
44691	G→T	R389S (CGC→AGC)	sll5047 ←	unknown protein	YES	NO	1	0	0	0	0	0	0	0	0
347820	A→C	intergenic (‑14/+564)	epsB ← / ← sll0922	exopolysaccharide export protein/ORF_ID:sll0922; unknown protein	YES	NO	1	0	0	0	0	0	0	0	0
1030851	G→C	Q219H (CAG→CAC)	purC →	phosphoribosyl aminoidazole succinocarboxamide synthetase	NO	YES	1	0	0	0	0	0	0	0	0
1417388	T→G	R35R (CGT→CGG)	slr2060 →	ORF_ID:slr2060; unknown protein	YES	NO	1	0	0	0	0	0	0	0	0
2107485	T→G	L558W (TTG→TGG)	slr0280 →	ORF_ID:slr0280; unknown protein	NO	YES	1	0	0	0	0	0	0	0	0
2680983	A→T	I297N (ATC→AAC)	dgt ←	dGTP triphosphohydrolase	YES	NO	1	0	0	0	0	0	0	0	0
3259369	A→C	V173V (GTT→GTG)	sll0529 ←	ORF_ID:sll0529; unknown protein	NO	YES	1	0	0	0	0	0	0	0	0
1364993	C→A	L157F (TTG→TTT)	sll0837 ←	ORF_ID:sll0837; unknown protein	YES	NO	1	0	0	0	0	0	0	0	0
1409502	G→T	Q50K (CAA→AAA)	sll1961 ←	ORF_ID:sll1961; unknown protein	YES	NO	1	0	0	0	0	0	0	0	0
3306444	G→T	T777N (ACC→AAC)	sll1366 ←	helicase of the snf2/rad54 family	NO	YES	1	0	0	0	0	0	0	0	0
67884	T→A	K31N (AAA→AAT)	sll5066 ←	ORF_ID:sll5066; probable plasmid partitioning protein, ParA family	NO	YES	1	0	0	0	0	0	0	0	0
134961	A→C	K175N (AAA→AAC)	infB →	initiation factor IF‑2	YES	NO	1	0	0	0	0	0	0	0	0
379321	C→T	A86V (GCC→GTC)	slr1075 →	transposase	NO	YES	1	0	0	0	0	0	0	0	0
1137538	C→G	S55C (TCC→TGC)	slr0878 →	ORF_ID:slr0878; hypothetical protein	NO	YES	1	0	0	0	0	0	0	0	0
1381040	A→T	I284N (ATC→AAC)	sll1161 ←	adenylate cyclase	YES	NO	1	0	0	0	0	0	0	0	0
2942656	T→A	K76N (AAA→AAT)	sll0597 ←	ORF_ID:sll0597; hypothetical protein	YES	NO	1	0	0	0	0	0	0	0	0
3558729	A→C	S417R (AGC→CGC)	slr0599 →	eukaryotic protein kinase	NO	YES	1	0	0	0	0	0	0	0	0
24168	C→A	G326V (GGT→GTT)	sll1202 ←	ORF_ID:sll1202; unknown protein	NO	YES	1	0	0	0	0	0	0	0	0
81633	C→A	V232V (GTC→GTA)	slr1122 →	ORF_ID:slr1122; unknown protein	YES	NO	1	0	0	0	0	0	0	0	0
372754	G→T	intergenic (+245/‑57)	galE → / → slr1068	UDP‑glucose‑4‑epimerase/ORF_ID:slr1068; unknown protein	YES	NO	1	0	0	0	0	0	0	0	0
1421538	T→A	I200N (ATC→AAC)	slr2062 →	transposase	NO	YES	1	0	0	0	0	0	0	0	0
2096417	A→C	W42G (TGG→GGG)	sll0419 ←	ORF_ID:sll0419; unknown protein	YES	NO	1	0	0	0	0	0	0	0	0
2498011	C→A	R96S (CGT→AGT)	recG →	DNA recombinase	YES	NO	1	0	0	0	0	0	0	0	0
2713071	G→T	P79T (CCA→ACA)	sll0371 ←	ORF_ID:sll0371; unknown protein	NO	YES	1	0	0	0	0	0	0	0	0
3298825	C→A	P167Q (CCA→CAA)	sbpA →	sulfate binding protein; SbpA	NO	YES	1	0	0	0	0	0	0	0	0
25218	G→A	R24R (CGG→CGA)	slr8030 →	ORF_ID:slr8030; hypothetical protein	YES	NO	1	0	0	0	0	0	0	0	0
90184	T→G	F68C (TTT→TGT)	slr6096 →	ORF_ID:slr6096; type I restriction‑modification system, M subunit (fragment)	YES	NO	1	0	0	0	0	0	0	0	0
714463	G→T	intergenic (‑285/+2)	sll1584 ← / ← lig	ORF_ID:sll1584; unknown protein/DNA ligase	NO	YES	1	0	0	0	0	0	0	0	0
755888	A→C	intergenic (‑286/‑165)	sll1924 ← / → slr2015	ORF_ID:sll1924; hypothetical protein/ORF_ID:slr2015; unknown protein	NO	YES	1	0	0	0	0	0	0	0	0
1065939	T→G	K1024N (AAA→AAC)	dnaX ←	DNA polymerase III subunit	YES	NO	1	0	0	0	0	0	0	0	0
1144864	A→C	K46T (AAG→ACG)	psr →	regulation of penicillin binding protein 5 production	NO	YES	1	0	0	0	0	0	0	0	0
1311321	G→T	intergenic (+87/‑507)	nth → / → slr1732	endonuclease III/ORF_ID:slr1732; unknown protein	NO	YES	1	0	0	0	0	0	0	0	0
1384680	G→T	D285Y (GAT→TAT)	slr1245 →	transcriptional regulator	NO	YES	1	0	0	0	0	0	0	0	0
1489197	T→G	W119G (TGG→GGG)	slr1727 →	eukaryotic Na+/H+ exchanger	NO	YES	1	0	0	0	0	0	0	0	0
1590606	T→G	P37P (CCT→CCG)	slr1506 →	ORF_ID:slr1506; unknown protein	YES	NO	1	0	0	0	0	0	0	0	0
2180739	T→G	L55V (TTG→GTG)	petF →	ferredoxin	YES	NO	1	0	0	0	0	0	0	0	0
2721706	A→C	F177V (TTC→GTC)	sll0188 ←	ORF_ID:sll0188; unknown protein	YES	NO	1	0	0	0	0	0	0	0	0
14283	A→T	Y21F (TAC→TTC)	slr7015 →	ORF_ID:slr7015; hypothetical protein	NO	YES	1	0	0	0	0	0	0	0	0
14360	G→T	E47* (GAA→TAA)	slr7015 →	ORF_ID:slr7015; hypothetical protein	YES	NO	1	0	0	0	0	0	0	0	0
755992	G→C	intergenic (‑390/‑61)	sll1924 ← / → slr2015	ORF_ID:sll1924; hypothetical protein/ORF_ID:slr2015; unknown protein	NO	YES	1	0	0	0	0	0	0	0	0
1287745	T→G	N340T (AAC→ACC)	sll1699 ←	extracellular solute‑binding protein	NO	YES	1	0	0	0	0	0	0	0	0
1415589	T→G	A488A (GCT→GCG)	topA →	DNA topoisomerase I	YES	NO	1	0	0	0	0	0	0	0	0
1594769	A→T	K217N (AAA→AAT)	slr1508 →	ORF_ID:slr1508; unknown protein	NO	YES	1	0	0	0	0	0	0	0	0
1683763	T→A	Q166H (CAA→CAT)	sll1217 ←	ORF_ID:sll1217; unknown protein	NO	YES	1	0	0	0	0	0	0	0	0
2497887	T→G	G54G (GGT→GGG)	recG →	DNA recombinase	YES	NO	1	0	0	0	0	0	0	0	0
3143947	C→A	G79W (GGG→TGG)	sll0044 ←	ORF_ID:sll0044; unknown protein	YES	NO	1	0	0	0	0	0	0	0	0
3174137	C→A	T268N (ACC→AAC)	nrtC →	nitrate transport protein; NrtC	YES	NO	1	0	0	0	0	0	0	0	0
3441553	C→A	D98Y (GAT→TAT)	sll0723 ←	ORF_ID:sll0723; unknown protein	NO	YES	1	0	0	0	0	0	0	0	0
18985	T→G	intergenic (‑672/+104)	ssl7019 ← / ← ssl7020	unknown protein/unknown protein	NO	YES	1	0	0	0	0	0	0	0	0
246673	A→C	F116C (TTT→TGT)	malQ ←	4‑alpha‑glucanotransferase	NO	YES	1	0	0	0	0	0	0	0	0
305471	G→T	L511F (TTG→TTT)	slr1301 →	ORF_ID:slr1301; unknown protein	YES	NO	1	0	0	0	0	0	0	0	0
321738	A→C	K14Q (AAG→CAG)	sir →	ferredoxin‑sulfite reductase	NO	YES	1	0	0	0	0	0	0	0	0
527495	Δ42 bp	coding (3150‑3191/5250 nt)	slr1753 →	ORF_ID:slr1753; unknown protein	YES	NO	1	0	0	0	0	0	0	0	0
552987	G→T	intergenic (‑120/+78)	sll1635 ← / ← psbK	ORF_ID:sll1635; Thy1 protein homologue/photosystem II PsbK protein	YES	NO	1	0	0	0	0	0	0	0	0
614842	T→G	M1R (ATG→AGG) †	slr1911 →	ORF_ID:slr1911; unknown protein	YES	NO	1	0	0	0	0	0	0	0	0
700275	T→G	F436V (TTC→GTC)	feoB →	ferrous iron transport protein B	YES	NO	1	0	0	0	0	0	0	0	0
1137531	T→G	F53V (TTT→GTT)	slr0878 →	ORF_ID:slr0878; hypothetical protein	YES	NO	1	0	0	0	0	0	0	0	0
1957710	G→C	intergenic (+224/‑48)	slr1677 → / → rpl21	ORF_ID:slr1677; unknown protein/50S ribosomal protein L21	NO	YES	1	0	0	0	0	0	0	0	0
2185567	A→C	L73W (TTG→TGG)	sll0149 ←	ORF_ID:sll0149; unknown protein	NO	YES	1	0	0	0	0	0	0	0	0
2200947	T→G	N5H (AAC→CAC)	sll0142 ←	cation or drug efflux system protein	NO	YES	1	0	0	0	0	0	0	0	0
2776594	T→G	H276Q (CAT→CAG)	slr0904 →	ORF_ID:slr0904; hypothetical protein	YES	NO	1	0	0	0	0	0	0	0	0
95242	G→T	L175F (TTG→TTT)	slr7097 →	ORF_ID:slr7097; hypothetical protein	NO	YES	1	0	0	0	0	0	0	0	0
277327	G→T	W300L (TGG→TTG)	slr1799 →	ORF_ID:slr1799; unknown protein	NO	YES	1	0	0	0	0	0	0	0	0
1519410	A→C	K99N (AAA→AAC)	slr0267 →	ORF_ID:slr0267; hypothetical protein	NO	YES	1	0	0	0	0	0	0	0	0
1559508	A→T	L35Q (CTA→CAA)	trxA ←	thiol:disulfide interchange protein; TrxA	YES	NO	1	0	0	0	0	0	0	0	0
2011414	T→A	intergenic (+45/‑107)	slr0944 → / → slr0945	ORF_ID:slr0944; hypothetical protein/ORF_ID:slr0945; unknown protein	YES	NO	1	0	0	0	0	0	0	0	0
2258878	T→G	S269A (TCG→GCG)	slr0990 →	ORF_ID:slr0990; unknown protein	YES	NO	1	0	0	0	0	0	0	0	0
3185906	A→T	I392L (ATA→TTA)	murE →	UDP‑MurNac‑tripeptide synthetase	NO	YES	1	0	0	0	0	0	0	0	0
21171	G→T	V302V (GTG→GTT)	slr7023 →	ORF_ID:slr7023; hypothetical protein	YES	NO	1	0	0	0	0	0	0	0	0
923835	C→A	G2V (GGA→GTA)	rpl10 ←	50S ribosomal protein L10	NO	YES	1	0	0	0	0	0	0	0	0
1178329	A→C	T2587P (ACT→CCT)	slr1403 →	ORF_ID:slr1403; integrin alpha‑ and beta4‑ subunit domain homologue	YES	NO	1	0	0	0	0	0	0	0	0
1288841	T→G	N91T (AAT→ACT)	sll1698 ←	ORF_ID:sll1698; unknown protein	NO	YES	1	0	0	0	0	0	0	0	0
1513936	G→T	E238* (GAA→TAA)	slr0265 →	transposase	NO	YES	1	0	0	0	0	0	0	0	0
1656076	A→C	I12L (ATT→CTT)	spoT →	(p)ppGpp 3'‑pyrophosphohydrolase	NO	YES	1	0	0	0	0	0	0	0	0
2037531	A→T	S333T (TCT→ACT)	bgl ←	beta‑glucosidase	YES	NO	1	0	0	0	0	0	0	0	0
2353159	C→A	Q613K (CAA→AAA)	slr0364 →	ORF_ID:slr0364; unknown protein	YES	NO	1	0	0	0	0	0	0	0	0
2404650	T→A	S107C (AGT→TGT)	rpl20 ←	50S ribosomal protein L20	YES	NO	1	0	0	0	0	0	0	0	0
2502694	A→C	N395K (AAT→AAG)	ponA ←	penicillin‑binding protein 1A	YES	NO	1	0	0	0	0	0	0	0	0
3240255	A→C	E25D (GAA→GAC)	trpC →	indole‑3‑glycerol phosphate synthase	YES	NO	1	0	0	0	0	0	0	0	0
3306427	G→T	P783T (CCA→ACA)	sll1366 ←	helicase of the snf2/rad54 family	NO	YES	1	0	0	0	0	0	0	0	0
3415169	G→T	E113* (GAA→TAA)	slr0748 →	ORF_ID:slr0748; unknown protein	YES	NO	1	0	0	0	0	0	0	0	0
217642	A→C	V229G (GTT→GGT)	ccmM ←	carbon dioxide concentrating mechanism protein; CcmM	YES	NO	1	0	0	0	0	0	0	0	0
630619	T→G	N325T (AAC→ACC)	sll0998 ←	LysR transcriptional regulator	NO	YES	1	0	0	0	0	0	0	0	0
1172808	A→C	E746D (GAA→GAC)	slr1403 →	ORF_ID:slr1403; integrin alpha‑ and beta4‑ subunit domain homologue	YES	NO	1	0	0	0	0	0	0	0	0
1178173	C→G	R2535G (CGT→GGT)	slr1403 →	ORF_ID:slr1403; integrin alpha‑ and beta4‑ subunit domain homologue	YES	NO	1	0	0	0	0	0	0	0	0
1519401	C→A	A96A (GCC→GCA)	slr0267 →	ORF_ID:slr0267; hypothetical protein	YES	NO	1	0	0	0	0	0	0	0	0
1603727	C→A	A145S (GCC→TCC)	sll1414 ←	ORF_ID:sll1414; hypothetical protein	YES	NO	1	0	0	0	0	0	0	0	0
1634399	T→G	P326P (CCT→CCG)	slr2120 →	ORF_ID:slr2120; unknown protein	YES	NO	1	0	0	0	0	0	0	0	0
1931782	T→G	L215R (CTG→CGG)	met3 →	sulfate adenylyltransferase	NO	YES	1	0	0	0	0	0	0	0	0
2280652	A→C	F99C (TTT→TGT)	ribC ←	riboflavin synthase alpha chain	YES	NO	1	0	0	0	0	0	0	0	0
2613833	T→G	G39G (GGT→GGG)	purN →	phosphoribosylglycinamide formyltransferase	YES	NO	1	0	0	0	0	0	0	0	0
2744040	T→A	I249N (ATT→AAT)	slr0207 →	ORF_ID:slr0207; unknown protein	YES	NO	1	0	0	0	0	0	0	0	0
3074098	G→T	A214E (GCA→GAA)	sll0782 ←	putative protein kinase	YES	NO	1	0	0	0	0	0	0	0	0
3353444	G→T	L83F (TTG→TTT)	slr0668 →	ORF_ID:slr0668; unknown protein	NO	YES	1	0	0	0	0	0	0	0	0
3521007	T→G	T230P (ACG→CCG)	prfA ←	peptide chain release factor	YES	NO	1	0	0	0	0	0	0	0	0
77107	A→C	Y101D (TAT→GAT)	dapB ←	dihydrodipicolinate reductase	YES	NO	1	0	0	0	0	0	0	0	0
1375786	G→T	D146Y (GAT→TAT)	slr1243 →	ORF_ID:slr1243; unknown protein	YES	NO	1	0	0	0	0	0	0	0	0
1938467	A→C	Q13H (CAA→CAC)	slr1170 →	ORF_ID:slr1170; unknown protein	NO	YES	1	0	0	0	0	0	0	0	0
2927729	C→A	G658W (GGG→TGG)	sll0474 ←	sensory transduction histidine kinase	NO	YES	1	0	0	0	0	0	0	0	0
24983	G→T	intergenic (+122/‑164)	slr8029 → / → slr8030	resolvase/ORF_ID:slr8030; hypothetical protein	NO	YES	1	0	0	0	0	0	0	0	0
312637	T→G	L127R (CTA→CGA)	slr1306 →	ORF_ID:slr1306; unknown protein	NO	YES	1	0	0	0	0	0	0	0	0
828820	C→T	D82N (GAT→AAT)	rpl17 ←	50S ribosomal protein L17	YES	NO	1	0	0	0	0	0	0	0	0
902704	T→A	T106T (ACT→ACA)	slr1215 →	ORF_ID:slr1215; unknown protein	NO	YES	1	0	0	0	0	0	0	0	0
1178245	A→C	N2559H (AAC→CAC)	slr1403 →	ORF_ID:slr1403; integrin alpha‑ and beta4‑ subunit domain homologue	NO	YES	1	0	0	0	0	0	0	0	0
1612753	A→C	intergenic (+124/‑44)	slr1520 → / → hflX	ORF_ID:slr1520; unknown protein/GTP‑binding protein; HflX	NO	YES	1	0	0	0	0	0	0	0	0
2172175	G→T	D4186Y (GAT→TAT)	slr0408 →	ORF_ID:slr0408; integrin alpha subunit domain homologue	YES	NO	1	0	0	0	0	0	0	0	0
3565442	A→T	D202V (GAC→GTC)	lepA →	LepA gene product	NO	YES	1	0	0	0	0	0	0	0	0
4849	C→A	D400Y (GAT→TAT)	sll8006 ←	type I restriction‑modification system S subunit	YES	NO	1	0	0	0	0	0	0	0	0
56860	A→C	A316A (GCT→GCG)	sll5057 ←	ORF_ID:sll5057; probable glycosyltransferase	NO	YES	1	0	0	0	0	0	0	0	0
92730	G→T	T205N (ACT→AAT)	sll6098 ←	ORF_ID:sll6098; hypothetical protein	YES	NO	1	0	0	0	0	0	0	0	0
1059576	A→C	N347T (AAT→ACT)	pmbA →	PmbA protein	YES	NO	1	0	0	0	0	0	0	0	0
1640058	G→C	E39Q (GAA→CAA)	slr2127 →	ORF_ID:slr2127; unknown protein	NO	YES	1	0	0	0	0	0	0	0	0
1957652	A→T	intergenic (+166/‑106)	slr1677 → / → rpl21	ORF_ID:slr1677; unknown protein/50S ribosomal protein L21	NO	YES	1	0	0	0	0	0	0	0	0
2297447	T→A	E375V (GAA→GTA)	sll0294 ←	ORF_ID:sll0294; unknown protein	NO	YES	1	0	0	0	0	0	0	0	0
2364020	Δ1 bp	coding (3564/5229 nt)	slr0366 →	ORF_ID:slr0366; unknown protein	NO	YES	1	0	0	0	0	0	0	0	0
2682603	T→G	E208D (GAA→GAC)	sll0396 ←	OmpR subfamily	NO	YES	1	0	0	0	0	0	0	0	0
3421017	G→C	R201P (CGA→CCA)	eno →	enolase	YES	NO	1	0	0	0	0	0	0	0	0
3423662	G→T	E211* (GAG→TAG)	p →	P protein	NO	YES	1	0	0	0	0	0	0	0	0
3491003	G→T	L167I (CTA→ATA)	sll0445 ←	ORF_ID:sll0445; unknown protein	NO	YES	1	0	0	0	0	0	0	0	0
18456	G→T	G193* (GGA→TGA)	slr5012 →	ORF_ID:slr5012; hypothetical protein	NO	YES	1	0	0	0	0	0	0	0	0
321719	T→G	A7A (GCT→GCG)	sir →	ferredoxin‑sulfite reductase	YES	NO	1	0	0	0	0	0	0	0	0
347699	A→C	G36G (GGT→GGG)	epsB ←	exopolysaccharide export protein	YES	NO	1	0	0	0	0	0	0	0	0
1529015	A→T	P749P (CCT→CCA)	sll0242 ←	ORF_ID:sll0242; unknown protein	YES	NO	1	0	0	0	0	0	0	0	0
1670607	A→T	M503L (ATG→TTG)	ymxG →	processing protease	NO	YES	1	0	0	0	0	0	0	0	0
1793727	T→A	intergenic (‑119/‑125)	sll1882 ← / → slr1975	ORF_ID:sll1882; hypothetical protein/renin‑binding protein	NO	YES	1	0	0	0	0	0	0	0	0
3163025	T→G	I407L (ATC→CTC)	sll0033 ←	ORF_ID:sll0033; unknown protein	NO	YES	1	0	0	0	0	0	0	0	0
3204849	A→C	V268G (GTT→GGT)	sll0505 ←	ORF_ID:sll0505; hypothetical protein	NO	YES	1	0	0	0	0	0	0	0	0
3440941	G→T	L302I (CTT→ATT)	sll0723 ←	ORF_ID:sll0723; unknown protein	YES	NO	1	0	0	0	0	0	0	0	0

## Sheet: Ext Fig 1C  HL-ALE
					novel mutation count discriminated by allele frequency
position	mutation	annotation	locus	function	5-10	10-15	15-30	30-45	45-60	60-75	75-90	90-99	100
46568	T→A	F46I (TTC→ATC)	ssr1480 →	RNA‑binding protein	0	0	0	0	0	0	0	0	6
86716	C→T	R29Q (CGG→CAG)	fus ←	elongation factor EF‑G	0	0	0	0	0	0	0	0	6
104833	Δ1 bp	coding (536/639 nt)	slr1546 →	ORF_ID:slr1546; unknown protein	0	0	0	0	0	0	0	0	6
171262	A→G	intergenic (+56/+10)	ssr1562 → / ← sll0898	ORF_ID:ssr1562; unknown protein/ORF_ID:sll0898; hypothetical protein	0	0	0	0	0	0	0	0	6
231415	A→G	E171G (GAA→GGA)	slr0509 →	alkaline phosphatase like protein	0	0	0	0	0	0	0	0	3
246201	A→G	K558R (AAA→AGA)	slr6050 →	ORF_ID:slr6050; hypothetical protein	0	0	0	0	0	0	0	0	3
248964	T→A	I9I (ATT→ATA)	slr1799 →	ORF_ID:slr1799; unknown protein	0	0	0	0	0	0	0	0	3
258957	A→G	intergenic (‑115/+185)	clpP ← / ← tig	ATP‑dependent Clp protease proteolytic subunit/trigger factor	0	0	0	0	0	0	0	0	3
270866	A→T	E278V (GAA→GTA)	slr1270 →	ORF_ID:slr1270; unknown protein	0	0	0	0	0	0	0	1	2
276454	A→T	L24Q (CTG→CAG)	sll1884 ←	ORF_ID:sll1884; unknown protein	0	0	0	0	0	0	0	1	2
326345	A→G	D200G (GAC→GGC)	slr1855 →	ORF_ID:slr1855; unknown protein	0	0	0	0	0	0	0	1	2
335515	T→C	Q83Q (CAA→CAG)	sll1891 ←	ORF_ID:sll1891; unknown protein	0	0	0	0	0	0	0	0	2
343779	A→T	S307T (TCT→ACT)	ftsZ ←	cell division FtsZ protein	0	0	0	1	0	0	0	0	1
344277	G→T	A283D (GCC→GAC)	ndhF ←	NADH dehydrogenase subunit 5	1	0	0	0	0	0	0	0	1
347756	C→T	A609V (GCC→GTC)	mcpA →	methyl‑accepting chemotaxis protein	1	0	0	0	0	0	0	0	1
356981	A→T	V93D (GTC→GAC)	sll0710 ←	ORF_ID:sll0710; unknown protein	0	0	0	0	0	0	0	0	1
363569	+T	intergenic (‑28/‑556)	nblA ← / → slr0271	NblA; phycobilisome degradation protein/ORF_ID:slr0271; unknown protein	0	0	0	0	0	0	0	0	1
386848	+T	intergenic (‑28/‑556)	nblA ← / → slr0271	NblA; phycobilisome degradation protein/ORF_ID:slr0271; unknown protein	0	0	0	0	0	0	0	0	1
386849	G→C	A347G (GCT→GGT)	ndhF ←	NADH dehydrogenase subunit 5	0	0	0	0	0	0	0	0	1
386850	+A	coding (28/366 nt)	sll1873 ←	ORF_ID:sll1873; unknown protein	0	0	0	0	0	0	0	0	1
386851	+TT	intergenic (‑28/‑556)	nblA ← / → slr0271	NblA; phycobilisome degradation protein/ORF_ID:slr0271; unknown protein	0	0	0	0	0	0	0	0	1
386852	+A	intergenic (‑28/‑556)	nblA ← / → slr0271	NblA; phycobilisome degradation protein/ORF_ID:slr0271; unknown protein	0	0	0	0	0	1	0	0	0
386853	+A	intergenic (‑28/‑556)	nblA ← / → slr0271	NblA; phycobilisome degradation protein/ORF_ID:slr0271; unknown protein	0	0	0	0	0	1	0	0	0
386854	+C	intergenic (‑28/‑556)	nblA ← / → slr0271	NblA; phycobilisome degradation protein/ORF_ID:slr0271; unknown protein	0	0	0	0	0	1	0	0	0
386855	+A	intergenic (‑28/‑556)	nblA ← / → slr0271	NblA; phycobilisome degradation protein/ORF_ID:slr0271; unknown protein	0	0	0	0	0	1	0	0	0
386856	+A	intergenic (‑28/‑556)	nblA ← / → slr0271	NblA; phycobilisome degradation protein/ORF_ID:slr0271; unknown protein	0	0	0	0	0	1	0	0	0
386857	+C	intergenic (‑28/‑556)	nblA ← / → slr0271	NblA; phycobilisome degradation protein/ORF_ID:slr0271; unknown protein	0	0	0	0	0	1	0	0	0
386858	+A	intergenic (‑28/‑556)	nblA ← / → slr0271	NblA; phycobilisome degradation protein/ORF_ID:slr0271; unknown protein	0	0	0	0	0	1	0	0	0
386859	+A	intergenic (‑28/‑556)	nblA ← / → slr0271	NblA; phycobilisome degradation protein/ORF_ID:slr0271; unknown protein	0	0	0	0	0	1	0	0	0
386968	+G	intergenic (‑28/‑556)	nblA ← / → slr0271	NblA; phycobilisome degradation protein/ORF_ID:slr0271; unknown protein	0	0	0	0	0	1	0	0	0
419012	+A	intergenic (‑28/‑556)	nblA ← / → slr0271	NblA; phycobilisome degradation protein/ORF_ID:slr0271; unknown protein	0	0	0	0	0	1	0	0	0
435422	C→A	noncoding (1905/2883 nt)	rrn23Sa ←	23S ribosomal RNA	0	0	0	0	1	0	0	0	0
470138	G→T	noncoding (1905/2883 nt)	rrn23Sb →	23S ribosomal RNA	0	0	0	0	1	0	0	0	0
494056	G→T	Q51H (CAG→CAT)	PCC6803_02855 →	hypothetical protein	0	0	0	1	0	0	0	0	0
520843	Δ1 bp	coding (684/1407 nt)	glcP ←	glucose transport protein	0	0	1	0	0	0	0	0	0
523115	Δ1 bp	coding (685/1407 nt)	glcP ←	glucose transport protein	0	0	1	0	0	0	0	0	0
527794	T→A	P1125P (CCT→CCA) º	slr1753 →	ORF_ID:slr1753; unknown protein	0	2	0	0	0	0	0	0	0
527842	Δ1 bp	coding (686/1407 nt)	glcP ←	glucose transport protein	0	0	1	0	0	0	0	0	0
527857	Δ1 bp	coding (687/1407 nt)	glcP ←	glucose transport protein	0	0	1	0	0	0	0	0	0
527857	Δ1 bp	coding (688/1407 nt)	glcP ←	glucose transport protein	0	0	1	0	0	0	0	0	0
559395	Δ1 bp	coding (689/1407 nt)	glcP ←	glucose transport protein	0	0	1	0	0	0	0	0	0
576600	T→G	P1125P (CCT→CCG) º	slr1753 →	ORF_ID:slr1753; unknown protein	1	1	0	0	0	0	0	0	0
652251	C→G	G394G (GGC→GGG)	ntpJ →	Na+ ‑ATPase subunit J	0	0	1	0	0	0	0	0	0
692582	G→T	E1104D (GAG→GAT) º	slr1753 →	ORF_ID:slr1753; unknown protein	1	0	0	0	0	0	0	0	0
906460	T→G	T48T (ACT→ACG) ‡	slr2000 →	ORF_ID:slr2000; hypothetical protein	1	0	0	0	0	0	0	0	0
