# Supplementary material
Source: Research Square preprint supplement (doi:10.21203/rs.3.rs-6305715/v1)
Supplement: Supplementary file 8 [file b639465c97d0d400130d1b50.xlsx]

## Sheet: description
Supplemental Data 6. Original data from the characterisation of the effects of the rpaB_T183P mutation.
Refers to Extended Data Figure 5, Figure 5, and Extended Figure 6.
abbreviation	meaning
APC	allophycocyanin
CBB	Coomassie Brilliant Blue
F685	fluorescence at 685 nm
F695	fluorescence at 695 nm
IQR	interquartile range
nd	no data
PC	phycocyanin
PSI/PSII	photosystem I/II
Q1	first quartile (exclusive)
Q3	third quartile (exclusive)
qN	coefficient of non-photochemical quenching of fluorescence
RGB	red, green, blue
SD	standard deviation

## Sheet: Ext_Fig_7B
Final OD730nm		FL+						HL1200
		LT	rpaB_T183P	rpaBkd	rpaBoe			LT	rpaB_T183P	rpaBkd	rpaBoe
		0.123	2.085	0.181	0.104			0.126	0.414	0.137	0.092
		0.12	2.33	0.18	0.16			0.158	0.7	0.168	0.156
		0.169	2.71	0.185	0.179			0.176	1.098	0.168	0.16
		0.17	3.01	0.192	0.162			0.119	0.347	0.135
		0.151	1.735	0.197					0.628
			2.47						0.632
			2.86
			2.585
Bonferroni & Holm p value:		LT	rpaB_T183P	rpaBkd	rpaBoe			LT	rpaB_T183P	rpaBkd	rpaBoe
*** p≤0.001	LT						LT
** p≤0.01	rpaB_T183P	3.9078e-11					rpaB_T183P	0.0029852
* p≤0.05	rpaBkd	2.42874	4.3712e-11				rpaBkd	0.951574	0.0028149
insignificant	rpaBoe	0.979121	8.9247e-11	1.68126			rpaBoe	1.8918	0.003623	2.70382
	Group superscript	a	b	a	a		Group superscript	a	b	a	a
	Average	0.1466	2.47313	0.187	0.15125		Average	0.14475	0.6365	0.152	0.136
	SD	0.0241516	0.417902	0.00731437	0.0326331		SD	0.0268747	0.264735	0.0184932	0.0381576
	% to LT		16.8699	0.0756128	0.808824		% to LT		4.39724	0.238806	0.894737
	Median	0.151	2.5275	0.185	0.161		Median	0.142	0.63	0.1525	0.156
	Q1	0.1215	2.14625	0.1805	0.118		Q1	0.12075	0.39725	0.1355	0.092
	Q3	0.1695	2.8225	0.1945	0.17475		Q3	0.1715	0.7995	0.168	0.16
	1.5×IQR	0.072	1.01437	0.021	0.085125		1.5×IQR	0.076125	0.603375	0.04875	0.102

## Sheet: Ext_Fig_7C
	under FL+																								under HL1200
genotype	LT					rpaB_T183P								rpaBoe				rpaBKD						genotype	LT				rpaB_T183P						rpaBoe			rpaBKD
replicate #	1	2	3	4	5	1	2	3	4	5	6	7	8	1	2	3	4	1	2	3	4	5		replicate #	1	2	3	4	1	2	3	4	5	6	1	2	3	1	2	3	4
time[h]																								time[h]
0	0.071	0.064	0.078	0.083	0.086	0.053	0.057	0.065	0.06	0.055	0.06	0.069	0.059	0.043	0.053	0.056	0.058	0.05	0.063	0.058	0.061	0.054		0	0.086	0.065	0.092	0.101	0.071	0.078	0.058	0.062	0.068	0.08	0.058	0.072	0.098	0.061	0.092	0.068	0.079
0.25	0.079	0.065	0.08	0.085	0.087	0.05	0.059	0.066	0.059	0.055	0.062	0.07	0.06	0.043	0.055	0.058	0.06	0.051	0.065	0.06	0.062	0.056		0.25	0.088	0.065	0.094	0.099	0.072	0.079	0.088	0.064	0.071	0.081	0.059	0.074	0.081	0.062	0.094	0.069	0.076
0.5	0.081	0.066	0.083	0.086	0.09	0.052	0.059	0.066	0.062	0.057	0.063	0.07	0.062	0.044	0.056	0.058	0.062	0.052	0.066	0.061	0.063	0.058		0.5	0.09	0.068	0.096	0.101	0.074	0.081	0.092	0.067	0.074	0.083	0.06	0.076	0.084	0.063	0.095	0.071	0.079
0.75	0.08	0.066	0.084	0.086	0.092	0.053	0.061	0.066	0.064	0.057	0.064	0.071	0.064	0.043	0.058	0.058	0.063	0.052	0.066	0.063	0.063	0.058		0.75	0.091	0.07	0.098	0.102	0.077	0.084	0.092	0.069	0.075	0.084	0.062	0.078	0.084	0.064	0.096	0.072	0.079
1	0.082	0.068	0.085	0.087	0.092	0.054	0.061	0.066	0.064	0.059	0.066	0.071	0.065	0.046	0.059	0.059	0.064	0.054	0.068	0.06	0.063	0.059		1	0.095	0.071	0.099	0.103	0.079	0.085	0.095	0.071	0.078	0.087	0.063	0.08	0.086	0.068	0.099	0.074	0.081
1.25	0.084	0.069	0.085	0.086	0.091	0.055	0.061	0.067	0.064	0.06	0.066	0.071	0.064	0.046	0.058	0.059	0.064	0.056	0.07	0.06	0.063	0.059		1.25	0.095	0.072	0.1	0.103	0.08	0.087	0.096	0.073	0.08	0.088	0.064	0.08	0.086	0.068	0.101	0.075	0.08
1.5	0.083	0.068	0.085	0.087	0.093	0.055	0.062	0.068	0.064	0.06	0.066	0.073	0.066	0.046	0.06	0.059	0.065	0.055	0.068	0.06	0.063	0.059		1.5	0.098	0.075	0.101	0.103	0.082	0.087	0.097	0.076	0.082	0.089	0.066	0.08	0.087	0.071	0.103	0.075	0.079
1.75	0.085	0.071	0.087	0.087	0.096	0.056	0.062	0.067	0.067	0.062	0.067	0.073	0.069	0.047	0.06	0.059	0.067	0.057	0.071	0.061	0.064	0.061		1.75	0.097	0.076	0.102	0.105	0.083	0.088	0.099	0.077	0.084	0.091	0.066	0.082	0.088	0.072	0.104	0.076	0.081
2	0.087	0.071	0.084	0.088	0.098	0.057	0.061	0.069	0.068	0.062	0.068	0.075	0.069	0.047	0.06	0.06	0.07	0.056	0.071	0.061	0.065	0.063		2	0.099	0.076	0.103	0.106	0.085	0.089	0.1	0.078	0.084	0.093	0.067	0.083	0.089	0.073	0.105	0.077	0.083
2.25	0.088	0.072	0.087	0.089	0.096	0.059	0.063	0.069	0.067	0.063	0.068	0.075	0.07	0.049	0.061	0.06	0.069	0.058	0.072	0.062	0.065	0.062		2.25	0.102	0.078	0.104	0.107	0.086	0.09	0.101	0.08	0.086	0.095	0.068	0.084	0.089	0.075	0.109	0.079	0.083
2.5	0.089	0.073	0.087	0.088	0.098	0.059	0.063	0.069	0.07	0.064	0.07	0.075	0.07	0.049	0.061	0.06	0.07	0.059	0.073	0.062	0.065	0.063		2.5	0.103	0.08	0.105	0.108	0.088	0.092	0.102	0.082	0.089	0.096	0.069	0.084	0.091	0.076	0.111	0.08	0.085
2.75	0.089	0.074	0.088	0.088	0.099	0.06	0.064	0.07	0.069	0.065	0.07	0.075	0.071	0.05	0.063	0.062	0.07	0.059	0.073	0.063	0.067	0.063		2.75	0.104	0.08	0.106	0.11	0.09	0.093	0.104	0.084	0.089	0.097	0.071	0.086	0.091	0.076	0.112	0.08	0.086
3	0.091	0.074	0.087	0.09	0.1	0.061	0.063	0.07	0.071	0.066	0.07	0.076	0.072	0.051	0.061	0.062	0.071	0.06	0.074	0.062	0.067	0.064		3	0.106	0.082	0.107	0.112	0.091	0.093	0.105	0.085	0.089	0.099	0.071	0.088	0.093	0.079	0.114	0.083	0.088
3.25	0.09	0.074	0.087	0.091	0.101	0.06	0.064	0.072	0.071	0.066	0.071	0.076	0.073	0.05	0.062	0.063	0.072	0.06	0.074	0.062	0.068	0.064		3.25	0.105	0.082	0.107	0.111	0.091	0.094	0.106	0.086	0.091	0.1	0.072	0.087	0.095	0.078	0.114	0.083	0.089
3.5	0.092	0.076	0.089	0.093	0.101	0.063	0.065	0.073	0.071	0.069	0.072	0.078	0.073	0.051	0.064	0.064	0.072	0.061	0.075	0.064	0.069	0.065		3.5	0.108	0.084	0.108	0.112	0.093	0.096	0.106	0.087	0.092	0.101	0.073	0.088	0.094	0.08	0.116	0.084	0.089
3.75	0.093	0.076	0.091	0.093	0.101	0.062	0.065	0.073	0.07	0.068	0.072	0.078	0.073	0.05	0.065	0.065	0.072	0.061	0.075	0.065	0.07	0.065		3.75	0.109	0.085	0.109	0.113	0.094	0.096	0.107	0.089	0.092	0.102	0.074	0.089	0.095	0.082	0.117	0.085	0.09
4	0.094	0.077	0.089	0.092	0.099	0.064	0.065	0.072	0.071	0.069	0.072	0.078	0.073	0.052	0.064	0.064	0.072	0.061	0.077	0.064	0.069	0.064		4	0.109	0.085	0.109	0.115	0.094	0.098	0.108	0.089	0.093	0.103	0.074	0.09	0.097	0.082	0.118	0.086	0.093
4.25	0.092	0.077	0.093	0.092	0.102	0.063	0.067	0.073	0.072	0.068	0.073	0.079	0.075	0.051	0.066	0.065	0.073	0.061	0.076	0.066	0.07	0.065		4.25	0.112	0.087	0.11	0.115	0.097	0.098	0.11	0.091	0.094	0.104	0.076	0.091	0.097	0.085	0.121	0.087	0.094
4.5	0.094	0.078	0.091	0.095	0.101	0.064	0.066	0.074	0.072	0.069	0.074	0.08	0.075	0.053	0.065	0.066	0.073	0.062	0.077	0.065	0.071	0.065		4.5	0.111	0.087	0.111	0.118	0.096	0.099	0.11	0.091	0.094	0.105	0.076	0.091	0.099	0.083	0.12	0.089	0.097
4.75	0.095	0.079	0.091	0.097	0.101	0.065	0.067	0.077	0.072	0.07	0.075	0.082	0.075	0.053	0.067	0.068	0.073	0.062	0.076	0.066	0.072	0.065		4.75	0.112	0.089	0.112	0.119	0.097	0.099	0.112	0.093	0.094	0.106	0.076	0.092	0.1	0.088	0.123	0.088	0.098
5	0.095	0.079	0.093	0.098	0.1	0.066	0.068	0.076	0.072	0.071	0.076	0.082	0.076	0.053	0.067	0.068	0.073	0.062	0.076	0.067	0.075	0.065		5	0.113	0.089	0.114	0.119	0.099	0.1	0.112	0.093	0.096	0.107	0.077	0.093	0.101	0.088	0.124	0.09	0.099
5.25	0.096	0.08	0.094	0.097	0.1	0.066	0.068	0.077	0.07	0.071	0.077	0.082	0.075	0.053	0.068	0.068	0.072	0.063	0.077	0.068	0.074	0.064		5.25	0.114	0.09	0.113	0.12	0.1	0.1	0.113	0.094	0.096	0.108	0.077	0.093	0.102	0.089	0.124	0.09	0.099
5.5	0.096	0.08	0.095	0.098	0.099	0.066	0.069	0.077	0.071	0.072	0.076	0.083	0.075	0.052	0.069	0.07	0.071	0.063	0.077	0.068	0.075	0.064		5.5	0.114	0.091	0.114	0.122	0.102	0.101	0.114	0.095	0.096	0.109	0.078	0.094	0.102	0.09	0.125	0.092	0.102
5.75	0.095	0.079	0.095	0.099	0.097	0.065	0.069	0.078	0.069	0.072	0.079	0.084	0.075	0.054	0.07	0.07	0.071	0.063	0.078	0.069	0.075	0.064		5.75	0.117	0.092	0.114	0.123	0.102	0.101	0.115	0.095	0.097	0.109	0.078	0.094	0.104	0.09	0.125	0.091	0.103
6	0.096	0.081	0.095	0.101	0.096	0.066	0.069	0.078	0.069	0.072	0.078	0.085	0.075	0.055	0.069	0.071	0.071	0.064	0.077	0.069	0.076	0.062		6	0.116	0.093	0.115	0.125	0.103	0.103	0.116	0.096	0.098	0.111	0.079	0.094	0.105	0.091	0.127	0.093	0.104
6.25	0.097	0.082	0.096	0.101	0.095	0.067	0.071	0.079	0.069	0.073	0.078	0.086	0.075	0.054	0.07	0.071	0.069	0.064	0.079	0.07	0.077	0.062		6.25	0.117	0.093	0.115	0.122	0.103	0.103	0.116	0.098	0.098	0.11	0.08	0.094	0.104	0.092	0.127	0.093	0.101
6.5	0.097	0.082	0.097	0.099	0.097	0.067	0.072	0.079	0.071	0.073	0.079	0.086	0.076	0.054	0.071	0.071	0.071	0.064	0.078	0.071	0.076	0.064		6.5	0.117	0.094	0.115	0.123	0.104	0.105	0.116	0.098	0.098	0.109	0.082	0.096	0.104	0.093	0.128	0.094	0.103
6.75	0.099	0.083	0.096	0.102	0.099	0.069	0.072	0.08	0.071	0.074	0.079	0.086	0.077	0.056	0.071	0.072	0.073	0.065	0.079	0.07	0.077	0.064		6.75	0.118	0.095	0.115	0.123	0.105	0.103	0.117	0.099	0.098	0.11	0.082	0.095	0.105	0.094	0.128	0.093	0.103
7	0.099	0.084	0.097	0.101	0.101	0.069	0.072	0.08	0.072	0.074	0.08	0.086	0.078	0.056	0.072	0.072	0.074	0.066	0.08	0.072	0.077	0.065		7	0.118	0.094	0.116	0.124	0.105	0.106	0.116	0.098	0.098	0.11	0.081	0.097	0.104	0.094	0.129	0.094	0.103
7.25	0.101	0.085	0.096	0.1	0.101	0.07	0.071	0.078	0.073	0.075	0.079	0.086	0.079	0.057	0.07	0.07	0.076	0.066	0.081	0.071	0.077	0.066		7.25	0.119	0.096	0.116	0.123	0.106	0.106	0.116	0.1	0.099	0.109	0.083	0.096	0.106	0.094	0.128	0.095	0.102
7.5	0.1	0.085	0.097	0.099	0.1	0.071	0.072	0.079	0.074	0.076	0.081	0.087	0.079	0.057	0.072	0.071	0.075	0.067	0.081	0.072	0.077	0.065		7.5	0.121	0.097	0.116	0.122	0.107	0.106	0.116	0.102	0.1	0.11	0.083	0.094	0.104	0.095	0.131	0.095	0.102
7.75	0.099	0.084	0.098	0.1	0.1	0.069	0.073	0.079	0.075	0.076	0.081	0.086	0.079	0.058	0.072	0.072	0.074	0.065	0.081	0.073	0.077	0.066		7.75	0.119	0.097	0.117	0.122	0.107	0.108	0.116	0.101	0.1	0.109	0.081	0.096	0.105	0.095	0.131	0.095	0.099
8	0.101	0.086	0.098	0.1	0.101	0.071	0.072	0.08	0.074	0.077	0.08	0.087	0.08	0.057	0.072	0.073	0.075	0.067	0.081	0.072	0.078	0.066		8	0.121	0.097	0.117	0.121	0.108	0.109	0.117	0.102	0.101	0.11	0.083	0.099	0.104	0.097	0.131	0.096	0.1
8.25	0.101	0.087	0.096	0.099	0.102	0.072	0.072	0.081	0.076	0.077	0.081	0.087	0.081	0.057	0.072	0.071	0.077	0.067	0.083	0.072	0.076	0.068		8.25	0.123	0.099	0.117	0.122	0.11	0.109	0.117	0.102	0.101	0.109	0.083	0.098	0.104	0.098	0.135	0.096	0.099
8.5	0.103	0.087	0.097	0.1	0.103	0.072	0.073	0.08	0.076	0.077	0.08	0.087	0.081	0.058	0.073	0.072	0.077	0.068	0.083	0.073	0.078	0.068		8.5	0.121	0.099	0.117	0.122	0.11	0.11	0.119	0.103	0.1	0.111	0.084	0.098	0.105	0.097	0.134	0.096	0.101
8.75	0.101	0.086	0.098	0.1	0.104	0.071	0.074	0.081	0.076	0.077	0.081	0.087	0.081	0.057	0.073	0.071	0.077	0.067	0.081	0.073	0.079	0.068		8.75	0.123	0.099	0.117	0.123	0.111	0.11	0.12	0.104	0.101	0.111	0.085	0.099	0.105	0.1	0.136	0.096	0.102
9	0.105	0.089	0.098	0.1	0.103	0.074	0.074	0.08	0.076	0.079	0.081	0.089	0.082	0.058	0.073	0.071	0.077	0.069	0.085	0.073	0.079	0.068		9	0.122	0.099	0.117	0.122	0.112	0.11	0.119	0.103	0.101	0.112	0.083	0.098	0.104	0.098	0.133	0.096	0.103
9.25	0.103	0.088	0.097	0.101	0.107	0.074	0.073	0.081	0.08	0.078	0.082	0.089	0.084	0.059	0.073	0.074	0.08	0.069	0.085	0.073	0.079	0.07		9.25	0.124	0.102	0.116	0.124	0.112	0.111	0.121	0.105	0.102	0.113	0.086	0.1	0.104	0.101	0.137	0.097	0.103
9.5	0.104	0.089	0.1	0.102	0.107	0.074	0.075	0.082	0.079	0.08	0.082	0.089	0.085	0.06	0.074	0.074	0.081	0.069	0.084	0.075	0.08	0.071		9.5	0.125	0.101	0.118	0.125	0.113	0.113	0.122	0.106	0.102	0.113	0.087	0.099	0.104	0.1	0.137	0.097	0.103
9.75	0.104	0.09	0.101	0.102	0.107	0.074	0.075	0.082	0.079	0.08	0.084	0.089	0.085	0.06	0.074	0.075	0.081	0.069	0.085	0.074	0.079	0.07		9.75	0.124	0.101	0.117	0.125	0.114	0.112	0.121	0.104	0.102	0.114	0.086	0.099	0.105	0.102	0.136	0.098	0.102
10	0.105	0.09	0.099	0.102	0.107	0.075	0.076	0.082	0.081	0.081	0.085	0.091	0.086	0.059	0.075	0.075	0.081	0.07	0.086	0.075	0.08	0.072		10	0.124	0.102	0.118	0.126	0.115	0.114	0.122	0.106	0.103	0.114	0.086	0.099	0.106	0.1	0.137	0.099	0.104
10.25	0.103	0.088	0.1	0.103	0.108	0.074	0.076	0.082	0.081	0.08	0.084	0.091	0.086	0.057	0.075	0.075	0.08	0.07	0.084	0.075	0.08	0.071		10.25	0.126	0.103	0.119	0.127	0.116	0.114	0.124	0.107	0.105	0.116	0.085	0.101	0.106	0.102	0.139	0.099	0.105
10.5	0.104	0.09	0.101	0.103	0.107	0.075	0.077	0.083	0.081	0.082	0.085	0.091	0.085	0.059	0.076	0.076	0.081	0.069	0.084	0.076	0.081	0.071		10.5	0.127	0.104	0.119	0.129	0.116	0.115	0.126	0.108	0.106	0.117	0.086	0.102	0.107	0.102	0.14	0.1	0.107
10.75	0.106	0.091	0.101	0.103	0.107	0.076	0.076	0.084	0.081	0.082	0.084	0.09	0.086	0.061	0.076	0.076	0.082	0.071	0.086	0.076	0.08	0.071		10.75	0.127	0.104	0.119	0.129	0.116	0.116	0.127	0.108	0.106	0.117	0.086	0.099	0.107	0.103	0.14	0.099	0.107
11	0.107	0.092	0.101	0.105	0.108	0.077	0.077	0.085	0.081	0.083	0.087	0.092	0.088	0.06	0.077	0.077	0.082	0.071	0.087	0.077	0.082	0.072		11	0.127	0.103	0.119	0.129	0.117	0.117	0.127	0.109	0.107	0.117	0.086	0.1	0.107	0.104	0.14	0.1	0.108
11.25	0.106	0.093	0.101	0.103	0.107	0.077	0.078	0.084	0.082	0.083	0.085	0.092	0.088	0.061	0.077	0.076	0.082	0.07	0.087	0.077	0.082	0.072		11.25	0.127	0.103	0.121	0.13	0.117	0.118	0.128	0.11	0.108	0.117	0.086	0.1	0.108	0.103	0.14	0.101	0.108
11.5	0.107	0.094	0.103	0.104	0.107	0.078	0.078	0.085	0.082	0.085	0.086	0.094	0.087	0.062	0.078	0.077	0.083	0.072	0.087	0.078	0.083	0.073		11.5	0.13	0.106	0.12	0.131	0.119	0.118	0.131	0.112	0.107	0.12	0.087	0.103	0.109	0.104	0.141	0.101	0.112
11.75	0.108	0.093	0.101	0.106	0.11	0.078	0.079	0.086	0.083	0.085	0.086	0.094	0.089	0.062	0.078	0.079	0.083	0.071	0.088	0.077	0.084	0.074		11.75	0.129	0.106	0.121	0.133	0.119	0.12	0.131	0.113	0.11	0.121	0.087	0.103	0.11	0.104	0.141	0.102	0.112
12	0.107	0.093	0.103	0.107	0.109	0.078	0.079	0.087	0.081	0.085	0.087	0.094	0.088	0.06	0.078	0.08	0.083	0.071	0.088	0.079	0.084	0.072		12	0.128	0.105	0.122	0.132	0.12	0.121	0.132	0.113	0.111	0.122	0.085	0.104	0.111	0.103	0.141	0.104	0.113
12.25	0.107	0.093	0.103	0.105	0.106	0.078	0.079	0.086	0.081	0.084	0.088	0.094	0.087	0.06	0.079	0.08	0.081	0.071	0.086	0.079	0.084	0.072		12.25	0.129	0.107	0.122	0.133	0.12	0.121	0.133	0.113	0.111	0.121	0.086	0.105	0.113	0.106	0.141	0.103	0.112
12.5	0.107	0.093	0.105	0.106	0.108	0.079	0.08	0.086	0.081	0.085	0.089	0.094	0.088	0.061	0.081	0.08	0.083	0.072	0.089	0.08	0.085	0.072		12.5	0.129	0.107	0.123	0.132	0.121	0.121	0.134	0.113	0.112	0.121	0.087	0.106	0.112	0.102	0.142	0.104	0.112
12.75	0.108	0.093	0.104	0.106	0.107	0.078	0.081	0.087	0.083	0.085	0.089	0.094	0.089	0.06	0.081	0.08	0.083	0.072	0.089	0.081	0.084	0.072		12.75	0.131	0.107	0.123	0.132	0.121	0.124	0.133	0.114	0.114	0.123	0.085	0.105	0.112	0.103	0.14	0.107	0.115
13	0.107	0.093	0.105	0.107	0.106	0.079	0.081	0.088	0.083	0.084	0.089	0.095	0.089	0.059	0.081	0.081	0.083	0.072	0.088	0.081	0.086	0.072		13	0.129	0.107	0.124	0.134	0.121	0.126	0.135	0.114	0.115	0.125	0.084	0.106	0.111	0.103	0.143	0.107	0.114
13.25	0.108	0.095	0.105	0.107	0.103	0.079	0.082	0.087	0.08	0.086	0.09	0.096	0.088	0.06	0.082	0.08	0.081	0.073	0.091	0.081	0.085	0.071		13.25	0.128	0.109	0.124	0.135	0.121	0.126	0.137	0.115	0.116	0.126	0.085	0.109	0.114	0.105	0.143	0.106	0.115
13.5	0.107	0.094	0.103	0.108	0.107	0.078	0.082	0.089	0.084	0.086	0.089	0.096	0.09	0.059	0.081	0.082	0.084	0.072	0.091	0.081	0.086	0.074		13.5	0.127	0.11	0.125	0.136	0.123	0.126	0.137	0.115	0.116	0.126	0.084	0.107	0.114	0.101	0.139	0.107	0.115
13.75	0.108	0.095	0.104	0.107	0.108	0.079	0.081	0.089	0.085	0.086	0.089	0.096	0.089	0.059	0.081	0.081	0.085	0.073	0.091	0.081	0.085	0.073		13.75	0.129	0.108	0.125	0.136	0.122	0.127	0.136	0.116	0.116	0.126	0.085	0.108	0.115	0.104	0.139	0.108	0.116
14	0.108	0.094	0.103	0.109	0.109	0.078	0.082	0.09	0.085	0.086	0.09	0.095	0.091	0.061	0.08	0.082	0.086	0.072	0.091	0.08	0.086	0.075		14	0.129	0.109	0.127	0.137	0.124	0.127	0.138	0.116	0.117	0.129	0.085	0.109	0.115	0.104	0.142	0.109	0.118
14.25	0.108	0.095	0.104	0.109	0.11	0.079	0.081	0.09	0.085	0.086	0.09	0.097	0.09	0.06	0.082	0.083	0.085	0.074	0.092	0.081	0.087	0.074		14.25	0.13	0.111	0.125	0.136	0.125	0.13	0.14	0.117	0.118	0.129	0.083	0.11	0.116	0.105	0.141	0.109	0.118
14.5	0.108	0.095	0.105	0.109	0.112	0.08	0.082	0.09	0.087	0.087	0.09	0.097	0.093	0.062	0.083	0.083	0.088	0.074	0.092	0.082	0.086	0.077		14.5	0.13	0.11	0.126	0.138	0.128	0.129	0.141	0.118	0.117	0.131	0.086	0.11	0.116	0.106	0.142	0.109	0.12
14.75	0.107	0.094	0.104	0.108	0.112	0.08	0.083	0.09	0.088	0.087	0.091	0.097	0.093	0.06	0.082	0.081	0.088	0.074	0.091	0.082	0.085	0.077		14.75	0.128	0.11	0.127	0.14	0.126	0.132	0.142	0.117	0.121	0.131	0.085	0.11	0.116	0.103	0.141	0.111	0.12
15	0.108	0.095	0.106	0.108	0.112	0.08	0.083	0.091	0.086	0.087	0.091	0.098	0.093	0.062	0.083	0.082	0.088	0.073	0.092	0.083	0.089	0.076		15	0.13	0.111	0.129	0.138	0.127	0.131	0.144	0.12	0.122	0.133	0.086	0.11	0.117	0.106	0.142	0.111	0.123
15.25	0.109	0.096	0.105	0.11	0.114	0.08	0.083	0.091	0.09	0.088	0.092	0.099	0.094	0.062	0.082	0.083	0.089	0.076	0.093	0.083	0.089	0.078		15.25	0.132	0.112	0.129	0.141	0.129	0.133	0.145	0.121	0.121	0.133	0.085	0.112	0.118	0.106	0.142	0.111	0.123
15.5	0.107	0.094	0.105	0.11	0.112	0.081	0.085	0.092	0.089	0.087	0.092	0.1	0.095	0.063	0.084	0.083	0.089	0.074	0.092	0.083	0.088	0.079		15.5	0.133	0.113	0.129	0.141	0.128	0.132	0.146	0.121	0.122	0.134	0.087	0.112	0.12	0.106	0.142	0.112	0.124
15.75	0.107	0.094	0.105	0.112	0.113	0.08	0.084	0.093	0.09	0.087	0.093	0.1	0.094	0.062	0.083	0.084	0.091	0.073	0.092	0.084	0.089	0.079		15.75	0.133	0.114	0.13	0.143	0.13	0.135	0.145	0.122	0.125	0.135	0.086	0.111	0.12	0.109	0.145	0.111	0.124
16	0.11	0.097	0.108	0.112	0.116	0.082	0.085	0.093	0.093	0.09	0.094	0.1	0.095	0.063	0.084	0.084	0.092	0.076	0.094	0.084	0.091	0.08		16	0.133	0.114	0.13	0.143	0.133	0.137	0.149	0.123	0.126	0.133	0.085	0.115	0.119	0.108	0.144	0.114	0.124
16.25	0.109	0.096	0.106	0.113	0.114	0.082	0.084	0.094	0.092	0.089	0.093	0.101	0.097	0.064	0.083	0.085	0.09	0.076	0.093	0.084	0.091	0.08		16.25	0.13	0.114	0.131	0.143	0.131	0.137	0.149	0.122	0.125	0.136	0.086	0.112	0.121	0.108	0.148	0.114	0.127
16.5	0.107	0.099	0.109	0.112	0.117	0.086	0.084	0.095	0.094	0.09	0.094	0.102	0.097	0.062	0.085	0.084	0.091	0.071	0.095	0.084	0.09	0.081		16.5	0.128	0.115	0.132	0.143	0.131	0.137	0.149	0.121	0.127	0.138	0.086	0.114	0.12	0.106	0.15	0.115	0.127
16.75	0.108	0.098	0.108	0.112	0.116	0.086	0.085	0.093	0.094	0.09	0.094	0.102	0.099	0.063	0.084	0.085	0.091	0.073	0.094	0.084	0.089	0.081		16.75	0.13	0.117	0.133	0.143	0.133	0.136	0.15	0.124	0.127	0.136	0.086	0.115	0.12	0.108	0.149	0.115	0.126
17	0.11	0.099	0.109	0.114	0.117	0.087	0.085	0.095	0.095	0.092	0.095	0.102	0.099	0.065	0.084	0.084	0.093	0.074	0.095	0.085	0.091	0.082		17	0.135	0.119	0.133	0.143	0.134	0.138	0.149	0.125	0.127	0.139	0.086	0.115	0.121	0.111	0.153	0.115	0.125
17.25	0.111	0.1	0.11	0.113	0.118	0.089	0.087	0.096	0.094	0.093	0.096	0.104	0.099	0.065	0.084	0.086	0.093	0.075	0.095	0.086	0.089	0.082		17.25	0.131	0.118	0.134	0.145	0.135	0.139	0.15	0.124	0.13	0.137	0.088	0.115	0.121	0.108	0.151	0.118	0.128
17.5	0.112	0.101	0.112	0.113	0.116	0.089	0.087	0.096	0.094	0.093	0.097	0.104	0.098	0.066	0.086	0.086	0.091	0.076	0.099	0.087	0.091	0.081		17.5	0.131	0.115	0.135	0.141	0.136	0.141	0.152	0.126	0.131	0.14	0.087	0.115	0.12	0.111	0.153	0.117	0.126
17.75	0.112	0.101	0.11	0.112	0.117	0.09	0.088	0.095	0.095	0.093	0.097	0.103	0.1	0.065	0.085	0.085	0.092	0.075	0.099	0.086	0.09	0.082		17.75	0.134	0.118	0.135	0.144	0.137	0.143	0.151	0.127	0.131	0.141	0.085	0.118	0.12	0.111	0.151	0.117	0.125
18	0.111	0.1	0.112	0.113	0.117	0.089	0.088	0.096	0.096	0.093	0.097	0.104	0.101	0.064	0.087	0.086	0.093	0.075	0.097	0.086	0.091	0.081		18	0.131	0.118	0.136	0.143	0.137	0.145	0.15	0.126	0.131	0.142	0.086	0.118	0.12	0.111	0.151	0.118	0.124
18.25	0.11	0.1	0.109	0.112	0.116	0.089	0.087	0.095	0.095	0.093	0.097	0.103	0.1	0.064	0.085	0.084	0.093	0.075	0.098	0.086	0.09	0.08		18.25	0.131	0.118	0.135	0.142	0.137	0.146	0.153	0.127	0.133	0.139	0.085	0.118	0.122	0.109	0.15	0.115	0.125
18.5	0.11	0.101	0.112	0.112	0.114	0.089	0.09	0.096	0.094	0.095	0.098	0.103	0.099	0.064	0.086	0.085	0.09	0.076	0.098	0.086	0.09	0.08		18.5	0.132	0.117	0.137	0.142	0.135	0.146	0.153	0.128	0.133	0.14	0.085	0.12	0.121	0.108	0.149	0.12	0.124
18.75	0.109	0.1	0.112	0.112	0.114	0.089	0.091	0.097	0.094	0.093	0.1	0.103	0.099	0.064	0.087	0.084	0.09	0.075	0.097	0.087	0.09	0.079		18.75	0.131	0.118	0.138	0.143	0.136	0.148	0.153	0.126	0.134	0.141	0.083	0.119	0.118	0.108	0.145	0.121	0.127
19	0.107	0.098	0.11	0.112	0.113	0.088	0.091	0.097	0.095	0.092	0.098	0.105	0.099	0.061	0.086	0.085	0.09	0.074	0.096	0.084	0.091	0.078		19	0.125	0.115	0.134	0.144	0.136	0.145	0.154	0.127	0.135	0.143	0.081	0.117	0.119	0.104	0.143	0.116	0.125
19.25	0.106	0.097	0.11	0.111	0.112	0.088	0.09	0.098	0.094	0.092	0.098	0.104	0.098	0.063	0.086	0.084	0.089	0.073	0.095	0.086	0.09	0.078		19.25	0.126	0.113	0.133	0.143	0.135	0.148	0.154	0.125	0.136	0.143	0.08	0.117	0.119	0.102	0.14	0.114	0.125
19.5	0.105	0.098	0.11	0.112	0.112	0.087	0.092	0.097	0.095	0.094	0.099	0.104	0.098	0.06	0.087	0.085	0.088	0.074	0.095	0.088	0.09	0.077		19.5	0.127	0.114	0.135	0.144	0.133	0.146	0.156	0.129	0.134	0.144	0.081	0.117	0.12	0.105	0.143	0.115	0.124
19.75	0.106	0.097	0.111	0.11	0.116	0.087	0.092	0.098	0.097	0.092	0.101	0.105	0.1	0.06	0.088	0.085	0.091	0.073	0.093	0.088	0.089	0.08		19.75	0.129	0.116	0.135	0.14	0.138	0.15	0.157	0.128	0.138	0.145	0.082	0.119	0.119	0.107	0.145	0.117	0.122
20	0.106	0.097	0.11	0.111	0.117	0.089	0.091	0.099	0.099	0.093	0.1	0.106	0.103	0.061	0.086	0.085	0.092	0.072	0.094	0.088	0.09	0.081		20	0.13	0.116	0.133	0.141	0.137	0.149	0.157	0.133	0.136	0.144	0.083	0.118	0.121	0.108	0.146	0.116	0.125
20.25	0.106	0.097	0.112	0.113	0.116	0.088	0.092	0.1	0.097	0.093	0.101	0.107	0.102	0.06	0.086	0.084	0.092	0.073	0.095	0.088	0.092	0.08		20.25	0.131	0.117	0.136	0.141	0.139	0.149	0.158	0.13	0.139	0.144	0.082	0.121	0.12	0.109	0.148	0.119	0.124
20.5	0.109	0.101	0.113	0.111	0.118	0.091	0.093	0.1	0.099	0.096	0.101	0.106	0.103	0.063	0.089	0.084	0.094	0.075	0.098	0.091	0.091	0.082		20.5	0.132	0.119	0.138	0.141	0.14	0.151	0.157	0.133	0.139	0.145	0.082	0.118	0.119	0.109	0.15	0.118	0.123
20.75	0.11	0.101	0.111	0.112	0.116	0.092	0.093	0.1	0.1	0.096	0.101	0.107	0.104	0.063	0.088	0.086	0.093	0.076	0.098	0.089	0.092	0.082		20.75	0.131	0.117	0.138	0.141	0.143	0.151	0.159	0.132	0.139	0.147	0.083	0.121	0.121	0.111	0.151	0.119	0.125
21	0.11	0.101	0.114	0.113	0.12	0.093	0.094	0.1	0.101	0.095	0.104	0.108	0.106	0.064	0.088	0.086	0.095	0.076	0.099	0.089	0.093	0.083		21	0.131	0.119	0.14	0.146	0.142	0.153	0.163	0.133	0.14	0.149	0.083	0.12	0.124	0.11	0.15	0.119	0.13
21.25	0.11	0.101	0.114	0.118	0.118	0.092	0.094	0.104	0.101	0.097	0.103	0.112	0.104	0.064	0.088	0.089	0.094	0.078	0.099	0.09	0.096	0.083		21.25	0.133	0.119	0.14	0.148	0.145	0.155	0.161	0.136	0.14	0.152	0.084	0.121	0.124	0.114	0.154	0.12	0.13
21.5	0.111	0.101	0.113	0.121	0.121	0.093	0.095	0.108	0.104	0.099	0.104	0.112	0.106	0.065	0.088	0.091	0.096	0.076	0.1	0.089	0.097	0.085		21.5	0.134	0.12	0.138	0.152	0.145	0.156	0.165	0.137	0.143	0.151	0.085	0.122	0.129	0.112	0.155	0.12	0.135
21.75	0.111	0.101	0.116	0.122	0.12	0.093	0.096	0.107	0.104	0.098	0.102	0.114	0.106	0.064	0.09	0.091	0.095	0.076	0.099	0.091	0.098	0.084		21.75	0.132	0.12	0.139	0.149	0.149	0.157	0.165	0.137	0.144	0.153	0.085	0.123	0.126	0.114	0.156	0.123	0.138
22	0.115	0.104	0.116	0.122	0.121	0.095	0.097	0.109	0.103	0.099	0.104	0.115	0.107	0.066	0.091	0.093	0.095	0.078	0.101	0.092	0.1	0.084		22	0.136	0.122	0.142	0.153	0.15	0.156	0.166	0.139	0.146	0.153	0.082	0.122	0.129	0.116	0.156	0.124	0.139
22.25	0.114	0.105	0.115	0.124	0.118	0.096	0.097	0.111	0.103	0.1	0.104	0.115	0.106	0.068	0.089	0.094	0.094	0.079	0.101	0.09	0.101	0.083		22.25	0.136	0.12	0.14	0.155	0.153	0.16	0.17	0.142	0.148	0.157	0.084	0.125	0.128	0.116	0.157	0.122	0.14
22.5	0.113	0.104	0.117	0.126	0.118	0.095	0.097	0.112	0.104	0.1	0.106	0.116	0.108	0.065	0.091	0.095	0.094	0.079	0.102	0.091	0.102	0.083		22.5	0.134	0.121	0.142	0.156	0.152	0.161	0.173	0.141	0.148	0.158	0.081	0.125	0.129	0.116	0.158	0.125	0.141
22.75	0.113	0.105	0.116	0.124	0.119	0.097	0.098	0.112	0.104	0.1	0.104	0.117	0.108	0.065	0.09	0.094	0.095	0.08	0.103	0.093	0.101	0.082		22.75	0.132	0.123	0.143	0.157	0.147	0.159	0.172	0.141	0.152	0.158	0.083	0.125	0.133	0.117	0.159	0.126	0.142
23	0.117	0.106	0.117	0.129	0.119	0.1	0.1	0.113	0.105	0.103	0.107	0.118	0.109	0.068	0.09	0.095	0.095	0.08	0.105	0.091	0.104	0.083		23	0.137	0.125	0.143	0.159	0.154	0.161	0.172	0.14	0.147	0.164	0.085	0.127	0.132	0.118	0.162	0.126	0.144
23.25	0.116	0.105	0.116	0.128	0.119	0.099	0.1	0.113	0.105	0.101	0.105	0.12	0.108	0.067	0.091	0.096	0.094	0.081	0.102	0.092	0.104	0.084		23.25	0.137	0.122	0.142	0.16	0.149	0.163	0.173	0.145	0.151	0.163	0.083	0.125	0.131	0.118	0.161	0.126	0.145
23.5	0.117	0.107	0.118	0.129	0.117	0.102	0.099	0.114	0.106	0.104	0.108	0.119	0.108	0.069	0.092	0.096	0.095	0.083	0.106	0.094	0.104	0.083		23.5	0.135	0.124	0.145	0.159	0.155	0.163	0.177	0.145	0.15	0.169	0.083	0.128	0.131	0.119	0.162	0.118	0.145
23.75	0.117	0.107	0.117	0.13	0.117	0.099	0.1	0.115	0.106	0.103	0.107	0.121	0.108	0.068	0.092	0.098	0.093	0.082	0.104	0.093	0.105	0.083		23.75	0.136	0.124	0.144	0.157	0.154	0.165	0.178	0.145	0.152	0.168	0.084	0.128	0.135	0.121	0.162	0.12	0.147
24	0.117	0.107	0.12	0.126	0.118	0.101	0.102	0.113	0.108	0.103	0.108	0.12	0.108	0.068	0.093	0.095	0.094	0.083	0.107	0.093	0.102	0.084		24	0.134	0.124	0.143	0.161	0.154	0.163	0.176	0.142	0.153	0.166	0.083	0.127	0.134	0.119	0.163	0.119	0.15
24.25	0.116	0.107	0.118	0.125	0.116	0.101	0.101	0.114	0.108	0.104	0.11	0.119	0.11	0.068	0.093	0.094	0.093	0.082	0.106	0.093	0.103	0.083		24.25	0.137	0.125	0.146	0.159	0.155	0.165	0.177	0.143	0.156	0.172	0.082	0.129	0.133	0.119	0.164	0.123	0.152
24.5	0.116	0.107	0.121	0.123	0.116	0.102	0.102	0.114	0.109	0.105	0.11	0.119	0.111	0.067	0.095	0.094	0.095	0.081	0.105	0.094	0.103	0.08		24.5	0.133	0.123	0.145	0.162	0.157	0.166	0.181	0.142	0.158	0.17	0.083	0.131	0.133	0.117	0.163	0.123	0.15
24.75	0.117	0.105	0.121	0.125	0.117	0.102	0.103	0.116	0.109	0.104	0.112	0.121	0.109	0.066	0.093	0.096	0.092	0.082	0.105	0.094	0.103	0.083		24.75	0.133	0.124	0.147	0.164	0.157	0.166	0.183	0.146	0.156	0.173	0.081	0.132	0.136	0.119	0.163	0.123	0.153
25	0.116	0.107	0.123	0.125	0.117	0.102	0.105	0.116	0.11	0.105	0.111	0.12	0.11	0.067	0.095	0.095	0.094	0.082	0.105	0.094	0.104	0.083		25	0.129	0.123	0.147	0.161	0.156	0.168	0.185	0.146	0.159	0.173	0.079	0.13	0.132	0.116	0.16	0.124	0.153
25.25	0.115	0.105	0.121	0.128	0.118	0.101	0.104	0.117	0.111	0.105	0.112	0.123	0.113	0.064	0.095	0.096	0.094	0.082	0.105	0.095	0.104	0.083		25.25	0.126	0.121	0.15	0.163	0.153	0.17	0.185	0.142	0.159	0.175	0.078	0.13	0.136	0.113	0.155	0.124	0.153
25.5	0.112	0.105	0.122	0.129	0.118	0.101	0.105	0.119	0.111	0.105	0.112	0.125	0.112	0.065	0.094	0.096	0.095	0.079	0.103	0.097	0.105	0.084		25.5	0.124	0.121	0.149	0.164	0.155	0.169	0.186	0.142	0.162	0.176	0.076	0.131	0.135	0.11	0.152	0.123	0.151
25.75	0.11	0.102	0.122	0.127	0.118	0.1	0.105	0.118	0.112	0.103	0.113	0.124	0.111	0.062	0.095	0.097	0.095	0.079	0.102	0.096	0.104	0.083		25.75	0.122	0.118	0.147	0.162	0.156	0.172	0.188	0.142	0.163	0.176	0.078	0.132	0.136	0.109	0.154	0.126	0.154
26	0.108	0.101	0.121	0.127	0.117	0.101	0.105	0.119	0.111	0.104	0.113	0.123	0.114	0.061	0.096	0.097	0.094	0.078	0.102	0.096	0.103	0.083		26	0.119	0.116	0.15	0.162	0.155	0.169	0.188	0.138	0.162	0.176	0.075	0.132	0.135	0.107	0.15	0.124	0.152
26.25	0.107	0.102	0.12	0.126	0.117	0.101	0.105	0.12	0.113	0.103	0.114	0.125	0.115	0.06	0.094	0.095	0.094	0.078	0.1	0.095	0.103	0.083		26.25	0.12	0.118	0.148	0.16	0.154	0.171	0.188	0.139	0.16	0.175	0.077	0.134	0.135	0.107	0.151	0.124	0.152
26.5	0.107	0.1	0.122	0.125	0.116	0.101	0.107	0.119	0.113	0.103	0.114	0.125	0.115	0.06	0.096	0.094	0.096	0.076	0.099	0.097	0.102	0.084		26.5	0.12	0.117	0.149	0.16	0.157	0.172	0.186	0.138	0.164	0.177	0.075	0.133	0.136	0.108	0.15	0.126	0.15
26.75	0.108	0.101	0.123	0.124	0.118	0.101	0.108	0.119	0.115	0.103	0.115	0.125	0.115	0.06	0.096	0.095	0.095	0.077	0.1	0.098	0.102	0.084		26.75	0.114	0.117	0.148	0.16	0.157	0.173	0.188	0.136	0.166	0.176	0.075	0.133	0.134	0.104	0.146	0.125	0.15
27	0.107	0.101	0.124	0.125	0.119	0.102	0.11	0.121	0.115	0.104	0.116	0.125	0.117	0.06	0.097	0.096	0.095	0.079	0.099	0.098	0.105	0.084		27	0.119	0.119	0.152	0.159	0.16	0.178	0.188	0.139	0.165	0.179	0.075	0.133	0.137	0.109	0.152	0.128	0.151
27.25	0.109	0.102	0.125	0.123	0.118	0.104	0.11	0.121	0.116	0.105	0.118	0.128	0.117	0.061	0.097	0.094	0.096	0.079	0.102	0.099	0.104	0.084		27.25	0.12	0.117	0.148	0.16	0.161	0.178	0.192	0.14	0.169	0.178	0.076	0.135	0.136	0.111	0.154	0.126	0.151
27.5	0.112	0.103	0.123	0.122	0.117	0.106	0.109	0.121	0.117	0.106	0.118	0.127	0.117	0.063	0.096	0.093	0.095	0.082	0.104	0.097	0.102	0.084		27.5	0.123	0.121	0.15	0.16	0.162	0.177	0.192	0.147	0.167	0.179	0.078	0.136	0.136	0.114	0.158	0.129	0.152
27.75	0.111	0.104	0.123	0.125	0.117	0.107	0.109	0.123	0.116	0.107	0.118	0.13	0.116	0.063	0.096	0.095	0.094	0.081	0.104	0.097	0.104	0.084		27.75	0.121	0.122	0.152	0.16	0.164	0.177	0.192	0.15	0.164	0.178	0.078	0.133	0.137	0.115	0.158	0.129	0.151
28	0.111	0.103	0.126	0.126	0.118	0.108	0.11	0.123	0.117	0.108	0.119	0.129	0.118	0.063	0.097	0.095	0.095	0.082	0.103	0.098	0.104	0.086		28	0.124	0.123	0.151	0.162	0.164	0.179	0.194	0.15	0.169	0.182	0.079	0.132	0.138	0.114	0.16	0.128	0.155
28.25	0.114	0.105	0.123	0.124	0.118	0.109	0.112	0.123	0.117	0.109	0.119	0.129	0.118	0.064	0.097	0.093	0.096	0.085	0.105	0.097	0.104	0.084		28.25	0.125	0.121	0.151	0.162	0.166	0.181	0.194	0.15	0.169	0.185	0.079	0.135	0.139	0.117	0.158	0.128	0.154
28.5	0.113	0.105	0.124	0.127	0.119	0.109	0.112	0.124	0.119	0.111	0.119	0.131	0.119	0.064	0.097	0.096	0.097	0.083	0.105	0.097	0.104	0.086		28.5	0.125	0.12	0.152	0.161	0.167	0.18	0.192	0.152	0.17	0.188	0.078	0.135	0.138	0.118	0.16	0.129	0.153
28.75	0.114	0.106	0.125	0.125	0.12	0.111	0.112	0.126	0.118	0.111	0.12	0.131	0.12	0.066	0.098	0.096	0.095	0.084	0.109	0.099	0.104	0.085		28.75	0.122	0.121	0.15	0.161	0.168	0.182	0.196	0.154	0.171	0.188	0.078	0.135	0.138	0.119	0.164	0.131	0.154
29	0.117	0.108	0.126	0.125	0.119	0.113	0.113	0.126	0.121	0.112	0.122	0.132	0.12	0.066	0.097	0.097	0.095	0.085	0.109	0.1	0.104	0.086		29	0.126	0.121	0.153	0.162	0.172	0.182	0.196	0.154	0.172	0.188	0.08	0.136	0.139	0.121	0.163	0.131	0.154
29.25	0.116	0.107	0.128	0.127	0.12	0.113	0.114	0.126	0.121	0.114	0.123	0.133	0.121	0.064	0.098	0.097	0.094	0.084	0.108	0.099	0.106	0.087		29.25	0.125	0.122	0.152	0.162	0.17	0.183	0.198	0.156	0.175	0.192	0.079	0.137	0.138	0.121	0.165	0.132	0.155
29.5	0.116	0.106	0.128	0.125	0.121	0.113	0.116	0.128	0.123	0.114	0.123	0.134	0.121	0.064	0.1	0.098	0.097	0.086	0.109	0.1	0.106	0.086		29.5	0.124	0.122	0.152	0.16	0.17	0.185	0.201	0.16	0.174	0.194	0.078	0.139	0.139	0.12	0.163	0.133	0.155
29.75	0.116	0.107	0.126	0.129	0.121	0.113	0.116	0.128	0.122	0.114	0.123	0.135	0.123	0.064	0.098	0.098	0.097	0.084	0.11	0.101	0.107	0.085		29.75	0.122	0.12	0.153	0.161	0.17	0.186	0.203	0.159	0.174	0.194	0.079	0.138	0.14	0.12	0.165	0.132	0.153
30	0.117	0.108	0.129	0.129	0.121	0.115	0.117	0.13	0.125	0.115	0.124	0.138	0.124	0.067	0.1	0.099	0.096	0.087	0.11	0.101	0.107	0.085		30	0.123	0.121	0.152	0.163	0.173	0.186	0.203	0.16	0.175	0.195	0.079	0.136	0.14	0.123	0.165	0.134	0.156
30.25	0.117	0.108	0.128	0.128	0.12	0.116	0.117	0.133	0.124	0.117	0.123	0.138	0.124	0.066	0.1	0.098	0.095	0.086	0.111	0.101	0.107	0.086		30.25	0.123	0.121	0.154	0.161	0.173	0.19	0.203	0.163	0.177	0.195	0.08	0.14	0.141	0.122	0.165	0.132	0.156
30.5	0.118	0.109	0.126	0.129	0.12	0.117	0.119	0.134	0.123	0.118	0.126	0.139	0.125	0.065	0.101	0.099	0.096	0.085	0.111	0.1	0.107	0.086		30.5	0.122	0.121	0.154	0.16	0.177	0.188	0.206	0.164	0.178	0.195	0.078	0.139	0.141	0.121	0.168	0.133	0.159
30.75	0.118	0.111	0.129	0.13	0.123	0.118	0.12	0.135	0.126	0.118	0.126	0.138	0.129	0.068	0.101	0.1	0.101	0.086	0.113	0.101	0.107	0.09		30.75	0.121	0.119	0.153	0.165	0.174	0.19	0.205	0.161	0.177	0.2	0.076	0.141	0.139	0.119	0.163	0.133	0.159
31	0.114	0.108	0.129	0.129	0.127	0.119	0.12	0.135	0.131	0.118	0.126	0.14	0.131	0.065	0.101	0.1	0.103	0.086	0.109	0.102	0.108	0.092		31	0.117	0.117	0.156	0.162	0.173	0.19	0.207	0.162	0.178	0.202	0.074	0.139	0.143	0.115	0.161	0.134	0.159
31.25	0.114	0.105	0.129	0.129	0.132	0.116	0.12	0.136	0.135	0.116	0.128	0.141	0.132	0.064	0.1	0.1	0.105	0.085	0.109	0.101	0.108	0.094		31.25	0.117	0.117	0.155	0.161	0.175	0.191	0.206	0.165	0.178	0.202	0.073	0.14	0.142	0.115	0.159	0.135	0.159
31.5	0.112	0.107	0.129	0.13	0.132	0.118	0.121	0.136	0.133	0.118	0.127	0.141	0.133	0.064	0.1	0.1	0.105	0.086	0.108	0.101	0.11	0.094		31.5	0.116	0.121	0.154	0.163	0.176	0.192	0.209	0.162	0.179	0.201	0.074	0.14	0.141	0.114	0.159	0.134	0.16
31.75	0.112	0.104	0.128	0.13	0.131	0.117	0.121	0.137	0.135	0.117	0.128	0.142	0.135	0.063	0.101	0.102	0.106	0.086	0.108	0.101	0.109	0.095		31.75	0.113	0.116	0.153	0.161	0.174	0.194	0.207	0.163	0.18	0.204	0.071	0.139	0.142	0.112	0.156	0.137	0.16
32	0.112	0.103	0.132	0.129	0.133	0.117	0.123	0.136	0.137	0.118	0.128	0.141	0.137	0.063	0.103	0.1	0.106	0.084	0.109	0.102	0.109	0.094		32	0.116	0.117	0.153	0.162	0.177	0.195	0.208	0.166	0.18	0.202	0.074	0.141	0.138	0.114	0.161	0.133	0.161
32.25	0.112	0.104	0.129	0.131	0.135	0.119	0.124	0.139	0.137	0.12	0.128	0.143	0.136	0.064	0.102	0.101	0.108	0.085	0.109	0.104	0.109	0.096		32.25	0.116	0.12	0.154	0.161	0.18	0.196	0.209	0.168	0.181	0.205	0.076	0.142	0.141	0.117	0.162	0.135	0.157
32.5	0.115	0.108	0.13	0.129	0.135	0.121	0.122	0.141	0.141	0.122	0.131	0.144	0.138	0.065	0.102	0.102	0.108	0.087	0.111	0.103	0.11	0.097		32.5	0.118	0.12	0.154	0.161	0.179	0.197	0.213	0.169	0.182	0.203	0.075	0.143	0.142	0.118	0.165	0.135	0.162
32.75	0.116	0.108	0.13	0.129	0.135	0.122	0.124	0.141	0.14	0.123	0.129	0.146	0.139	0.066	0.102	0.102	0.109	0.089	0.11	0.103	0.109	0.098		32.75	0.116	0.12	0.151	0.161	0.18	0.196	0.211	0.171	0.181	0.204	0.077	0.141	0.14	0.119	0.165	0.134	0.163
33	0.116	0.108	0.13	0.129	0.137	0.122	0.125	0.141	0.142	0.123	0.131	0.147	0.14	0.065	0.103	0.102	0.111	0.085	0.11	0.103	0.109	0.1		33	0.119	0.12	0.152	0.16	0.18	0.196	0.214	0.17	0.186	0.203	0.077	0.14	0.141	0.118	0.166	0.134	0.159
33.25	0.117	0.108	0.131	0.13	0.139	0.125	0.124	0.142	0.141	0.124	0.131	0.149	0.142	0.066	0.104	0.102	0.111	0.087	0.112	0.104	0.111	0.1		33.25	0.119	0.121	0.152	0.16	0.181	0.198	0.214	0.171	0.186	0.206	0.076	0.141	0.141	0.119	0.165	0.134	0.16
33.5	0.119	0.11	0.13	0.129	0.14	0.125	0.125	0.142	0.143	0.126	0.132	0.147	0.142	0.067	0.104	0.103	0.112	0.09	0.112	0.102	0.111	0.1		33.5	0.121	0.12	0.153	0.163	0.184	0.199	0.221	0.175	0.184	0.207	0.077	0.14	0.142	0.121	0.167	0.136	0.16
33.75	0.12	0.112	0.132	0.129	0.142	0.127	0.129	0.144	0.146	0.127	0.132	0.149	0.143	0.068	0.104	0.104	0.113	0.088	0.114	0.103	0.11	0.099		33.75	0.118	0.122	0.155	0.161	0.186	0.2	0.22	0.176	0.189	0.207	0.078	0.143	0.142	0.123	0.169	0.137	0.163
34	0.118	0.111	0.131	0.13	0.143	0.127	0.129	0.144	0.145	0.127	0.134	0.151	0.144	0.068	0.105	0.103	0.113	0.089	0.112	0.103	0.111	0.101		34	0.117	0.122	0.154	0.16	0.188	0.203	0.222	0.177	0.192	0.206	0.076	0.142	0.139	0.124	0.167	0.135	0.16
34.25	0.119	0.11	0.132	0.129	0.143	0.127	0.129	0.143	0.149	0.127	0.134	0.151	0.145	0.068	0.104	0.103	0.114	0.09	0.114	0.105	0.11	0.102		34.25	0.117	0.121	0.153	0.156	0.189	0.204	0.223	0.178	0.19	0.207	0.078	0.142	0.141	0.121	0.17	0.133	0.156
34.5	0.121	0.111	0.132	0.129	0.144	0.13	0.129	0.146	0.15	0.129	0.135	0.152	0.147	0.068	0.106	0.104	0.114	0.09	0.115	0.105	0.111	0.104		34.5	0.12	0.12	0.155	0.16	0.189	0.204	0.226	0.178	0.192	0.21	0.076	0.142	0.142	0.122	0.169	0.136	0.161
34.75	0.122	0.11	0.135	0.129	0.144	0.13	0.131	0.148	0.153	0.131	0.135	0.153	0.149	0.069	0.107	0.103	0.116	0.093	0.117	0.107	0.111	0.102		34.75	0.118	0.119	0.154	0.158	0.19	0.206	0.228	0.181	0.192	0.21	0.077	0.145	0.14	0.123	0.168	0.135	0.159
35	0.119	0.111	0.133	0.13	0.144	0.13	0.131	0.148	0.151	0.13	0.138	0.152	0.148	0.068	0.107	0.104	0.114	0.091	0.114	0.106	0.112	0.103		35	0.118	0.121	0.152	0.157	0.191	0.207	0.228	0.179	0.193	0.214	0.077	0.144	0.143	0.123	0.168	0.137	0.159
35.25	0.119	0.11	0.134	0.13	0.146	0.131	0.132	0.146	0.153	0.129	0.138	0.153	0.15	0.067	0.106	0.105	0.115	0.09	0.114	0.107	0.111	0.105		35.25	0.117	0.12	0.153	0.16	0.188	0.208	0.227	0.178	0.197	0.213	0.077	0.145	0.142	0.121	0.165	0.136	0.16
35.5	0.118	0.111	0.134	0.131	0.146	0.13	0.135	0.151	0.153	0.13	0.139	0.155	0.151	0.067	0.108	0.105	0.117	0.092	0.114	0.107	0.113	0.105		35.5	0.115	0.119	0.155	0.158	0.19	0.21	0.229	0.178	0.197	0.213	0.075	0.142	0.142	0.119	0.162	0.136	0.159
35.75	0.118	0.108	0.135	0.131	0.147	0.132	0.135	0.149	0.155	0.13	0.139	0.155	0.151	0.066	0.107	0.104	0.117	0.091	0.112	0.107	0.113	0.107		35.75	0.111	0.117	0.152	0.158	0.191	0.211	0.23	0.178	0.197	0.215	0.075	0.145	0.139	0.116	0.16	0.136	0.161
36	0.114	0.109	0.134	0.134	0.147	0.131	0.135	0.153	0.155	0.13	0.142	0.157	0.153	0.064	0.107	0.106	0.118	0.089	0.113	0.107	0.115	0.105		36	0.113	0.116	0.155	0.158	0.191	0.214	0.232	0.176	0.197	0.216	0.073	0.142	0.141	0.115	0.16	0.137	0.161
36.25	0.113	0.107	0.135	0.13	0.147	0.132	0.135	0.152	0.159	0.131	0.143	0.157	0.153	0.065	0.107	0.105	0.118	0.089	0.113	0.107	0.114	0.107		36.25	0.114	0.117	0.154	0.159	0.194	0.215	0.233	0.182	0.199	0.217	0.075	0.145	0.143	0.118	0.164	0.136	0.159
36.5	0.118	0.109	0.136	0.133	0.148	0.132	0.138	0.154	0.159	0.134	0.143	0.158	0.156	0.067	0.11	0.105	0.118	0.091	0.114	0.109	0.113	0.107		36.5	0.116	0.117	0.157	0.158	0.193	0.217	0.235	0.182	0.2	0.218	0.076	0.144	0.139	0.12	0.165	0.14	0.16
36.75	0.117	0.11	0.137	0.131	0.148	0.134	0.139	0.152	0.158	0.135	0.143	0.158	0.156	0.066	0.108	0.106	0.117	0.089	0.115	0.109	0.112	0.108		36.75	0.119	0.118	0.158	0.156	0.196	0.215	0.233	0.185	0.2	0.217	0.077	0.144	0.14	0.121	0.165	0.138	0.161
37	0.12	0.11	0.135	0.134	0.144	0.136	0.14	0.157	0.159	0.136	0.144	0.159	0.156	0.067	0.109	0.107	0.115	0.092	0.116	0.108	0.114	0.104		37	0.117	0.119	0.157	0.158	0.196	0.218	0.238	0.187	0.202	0.222	0.077	0.146	0.143	0.124	0.167	0.139	0.161
37.25	0.119	0.112	0.136	0.131	0.144	0.135	0.141	0.156	0.157	0.137	0.145	0.16	0.155	0.068	0.108	0.106	0.114	0.093	0.116	0.109	0.115	0.105		37.25	0.117	0.12	0.154	0.157	0.199	0.221	0.239	0.188	0.205	0.223	0.076	0.144	0.141	0.123	0.167	0.138	0.161
37.5	0.12	0.112	0.134	0.134	0.141	0.139	0.141	0.157	0.158	0.137	0.144	0.161	0.156	0.069	0.108	0.105	0.114	0.092	0.116	0.109	0.114	0.102		37.5	0.116	0.12	0.154	0.155	0.199	0.221	0.244	0.186	0.207	0.223	0.076	0.143	0.141	0.123	0.166	0.137	0.161
37.75	0.121	0.111	0.137	0.132	0.142	0.14	0.142	0.158	0.157	0.139	0.147	0.163	0.156	0.068	0.11	0.105	0.113	0.093	0.116	0.11	0.115	0.102		37.75	0.119	0.121	0.154	0.155	0.205	0.223	0.242	0.192	0.204	0.224	0.077	0.144	0.141	0.124	0.168	0.139	0.159
38	0.122	0.109	0.137	0.132	0.14	0.14	0.144	0.158	0.159	0.139	0.147	0.165	0.156	0.068	0.109	0.107	0.112	0.092	0.117	0.11	0.114	0.1		38	0.118	0.119	0.156	0.155	0.202	0.226	0.243	0.187	0.204	0.225	0.077	0.147	0.141	0.125	0.168	0.141	0.16
38.25	0.123	0.113	0.137	0.132	0.138	0.14	0.144	0.159	0.158	0.14	0.148	0.164	0.156	0.068	0.111	0.106	0.11	0.094	0.119	0.109	0.115	0.101		38.25	0.119	0.122	0.154	0.154	0.205	0.224	0.244	0.19	0.207	0.225	0.078	0.146	0.14	0.126	0.171	0.14	0.16
38.5	0.122	0.113	0.138	0.131	0.139	0.142	0.145	0.158	0.159	0.143	0.148	0.165	0.156	0.069	0.112	0.107	0.113	0.094	0.117	0.11	0.114	0.101		38.5	0.116	0.121	0.153	0.156	0.205	0.226	0.247	0.192	0.21	0.231	0.078	0.146	0.14	0.123	0.17	0.138	0.158
38.75	0.124	0.113	0.138	0.133	0.136	0.143	0.144	0.161	0.157	0.143	0.15	0.165	0.158	0.07	0.111	0.107	0.111	0.093	0.119	0.11	0.115	0.101		38.75	0.116	0.122	0.153	0.155	0.205	0.227	0.247	0.194	0.209	0.23	0.079	0.146	0.14	0.125	0.168	0.141	0.16
39	0.123	0.113	0.137	0.132	0.138	0.142	0.145	0.161	0.159	0.143	0.149	0.166	0.157	0.071	0.11	0.108	0.112	0.094	0.12	0.111	0.113	0.1		39	0.117	0.119	0.153	0.154	0.208	0.231	0.247	0.19	0.21	0.231	0.077	0.146	0.142	0.126	0.169	0.14	0.16
39.25	0.121	0.113	0.137	0.135	0.138	0.143	0.147	0.164	0.159	0.145	0.15	0.164	0.156	0.068	0.113	0.109	0.11	0.093	0.12	0.11	0.116	0.101		39.25	0.113	0.115	0.153	0.153	0.205	0.233	0.251	0.195	0.212	0.232	0.076	0.145	0.142	0.12	0.165	0.139	0.159
39.5	0.121	0.113	0.138	0.134	0.139	0.142	0.148	0.164	0.163	0.144	0.152	0.169	0.16	0.068	0.113	0.108	0.113	0.091	0.119	0.11	0.114	0.103		39.5	0.11	0.117	0.156	0.155	0.204	0.235	0.249	0.193	0.213	0.234	0.077	0.145	0.142	0.12	0.164	0.137	0.162
39.75	0.119	0.112	0.14	0.134	0.139	0.141	0.148	0.164	0.164	0.144	0.152	0.17	0.16	0.066	0.114	0.11	0.113	0.092	0.118	0.111	0.115	0.106		39.75	0.111	0.116	0.153	0.156	0.202	0.239	0.254	0.196	0.215	0.235	0.072	0.149	0.142	0.118	0.161	0.14	0.159
40	0.12	0.11	0.138	0.133	0.143	0.142	0.149	0.165	0.166	0.143	0.153	0.17	0.162	0.066	0.114	0.11	0.114	0.092	0.116	0.11	0.117	0.107		40	0.109	0.113	0.153	0.156	0.206	0.236	0.253	0.193	0.214	0.237	0.075	0.146	0.141	0.116	0.16	0.138	0.159
40.25	0.119	0.111	0.139	0.133	0.143	0.141	0.15	0.163	0.166	0.145	0.155	0.169	0.163	0.066	0.115	0.108	0.115	0.092	0.115	0.111	0.114	0.106		40.25	0.109	0.117	0.153	0.156	0.206	0.241	0.255	0.196	0.216	0.237	0.074	0.146	0.139	0.121	0.16	0.137	0.16
40.5	0.121	0.111	0.14	0.134	0.145	0.143	0.151	0.168	0.169	0.146	0.157	0.172	0.167	0.067	0.116	0.109	0.117	0.101	0.117	0.113	0.117	0.107		40.5	0.109	0.115	0.153	0.156	0.21	0.239	0.258	0.196	0.218	0.241	0.075	0.149	0.139	0.122	0.162	0.136	0.162
40.75	0.12	0.111	0.138	0.137	0.144	0.142	0.151	0.169	0.17	0.146	0.156	0.173	0.166	0.066	0.115	0.111	0.117	0.099	0.118	0.111	0.117	0.108		40.75	0.111	0.117	0.154	0.155	0.21	0.243	0.258	0.2	0.224	0.24	0.075	0.146	0.139	0.124	0.164	0.137	0.159
41	0.122	0.114	0.139	0.136	0.145	0.143	0.152	0.17	0.171	0.148	0.156	0.174	0.168	0.065	0.115	0.112	0.118	0.103	0.119	0.113	0.119	0.11		41	0.113	0.116	0.155	0.154	0.218	0.243	0.26	0.201	0.222	0.242	0.076	0.148	0.141	0.121	0.166	0.138	0.159
41.25	0.124	0.114	0.142	0.138	0.146	0.146	0.154	0.168	0.173	0.149	0.157	0.173	0.167	0.067	0.115	0.109	0.119	0.102	0.119	0.112	0.118	0.109		41.25	0.112	0.116	0.157	0.155	0.216	0.246	0.261	0.198	0.224	0.243	0.078	0.147	0.141	0.124	0.163	0.14	0.158
41.5	0.124	0.114	0.142	0.139	0.146	0.145	0.156	0.171	0.174	0.15	0.161	0.175	0.168	0.068	0.116	0.111	0.117	0.101	0.12	0.112	0.118	0.108		41.5	0.112	0.119	0.156	0.157	0.219	0.247	0.263	0.2	0.226	0.243	0.076	0.15	0.143	0.124	0.166	0.141	0.159
41.75	0.125	0.115	0.14	0.138	0.148	0.148	0.155	0.171	0.175	0.152	0.16	0.177	0.169	0.068	0.118	0.113	0.118	0.103	0.121	0.112	0.118	0.11		41.75	0.112	0.117	0.153	0.155	0.222	0.248	0.263	0.199	0.228	0.245	0.079	0.148	0.141	0.123	0.164	0.14	0.156
42	0.125	0.114	0.14	0.137	0.15	0.15	0.158	0.171	0.176	0.151	0.162	0.178	0.17	0.068	0.117	0.114	0.119	0.102	0.118	0.114	0.118	0.11		42	0.112	0.115	0.154	0.153	0.224	0.249	0.268	0.202	0.23	0.247	0.078	0.148	0.141	0.126	0.166	0.141	0.159
42.25	0.125	0.114	0.14	0.136	0.149	0.151	0.156	0.171	0.176	0.154	0.161	0.179	0.17	0.068	0.116	0.112	0.122	0.104	0.121	0.112	0.12	0.111		42.25	0.114	0.117	0.153	0.155	0.225	0.253	0.266	0.201	0.233	0.248	0.077	0.148	0.142	0.124	0.165	0.138	0.156
42.5	0.125	0.113	0.143	0.14	0.15	0.152	0.158	0.174	0.178	0.155	0.162	0.179	0.17	0.068	0.119	0.113	0.119	0.103	0.121	0.114	0.118	0.109		42.5	0.112	0.117	0.153	0.156	0.227	0.254	0.268	0.2	0.235	0.25	0.078	0.146	0.14	0.125	0.166	0.141	0.159
42.75	0.124	0.113	0.143	0.139	0.151	0.153	0.158	0.174	0.18	0.155	0.165	0.18	0.176	0.068	0.118	0.114	0.123	0.104	0.122	0.114	0.12	0.111		42.75	0.111	0.116	0.155	0.155	0.226	0.255	0.271	0.201	0.237	0.251	0.076	0.146	0.142	0.124	0.164	0.142	0.158
43	0.126	0.114	0.147	0.14	0.151	0.153	0.162	0.176	0.182	0.156	0.166	0.183	0.176	0.068	0.12	0.112	0.122	0.103	0.123	0.114	0.12	0.112		43	0.109	0.115	0.157	0.154	0.228	0.259	0.273	0.202	0.236	0.254	0.078	0.15	0.141	0.125	0.166	0.143	0.157
43.25	0.124	0.114	0.146	0.139	0.148	0.153	0.162	0.177	0.181	0.156	0.166	0.183	0.173	0.068	0.119	0.114	0.122	0.104	0.122	0.116	0.119	0.109		43.25	0.113	0.118	0.155	0.154	0.227	0.261	0.273	0.201	0.24	0.252	0.077	0.151	0.141	0.124	0.165	0.142	0.159
43.5	0.126	0.115	0.149	0.137	0.149	0.156	0.166	0.176	0.181	0.159	0.168	0.184	0.174	0.07	0.12	0.113	0.12	0.103	0.123	0.117	0.121	0.112		43.5	0.112	0.118	0.156	0.155	0.225	0.26	0.273	0.2	0.239	0.256	0.076	0.146	0.139	0.123	0.166	0.141	0.156
43.75	0.126	0.113	0.145	0.139	0.146	0.157	0.165	0.176	0.183	0.158	0.168	0.184	0.175	0.068	0.119	0.112	0.118	0.103	0.123	0.115	0.12	0.11		43.75	0.112	0.114	0.152	0.151	0.229	0.262	0.274	0.203	0.238	0.257	0.075	0.148	0.141	0.124	0.166	0.142	0.157
44	0.126	0.114	0.146	0.138	0.146	0.157	0.165	0.177	0.183	0.16	0.168	0.188	0.175	0.068	0.121	0.112	0.12	0.104	0.123	0.115	0.12	0.109		44	0.111	0.114	0.154	0.156	0.229	0.261	0.278	0.202	0.241	0.26	0.079	0.146	0.144	0.125	0.164	0.139	0.156
44.25	0.125	0.114	0.148	0.139	0.144	0.155	0.166	0.179	0.183	0.16	0.168	0.186	0.176	0.068	0.12	0.113	0.118	0.104	0.123	0.116	0.12	0.109		44.25	0.108	0.113	0.154	0.152	0.229	0.265	0.28	0.2	0.243	0.26	0.074	0.146	0.144	0.118	0.162	0.133	0.156
44.5	0.125	0.116	0.146	0.139	0.144	0.157	0.167	0.18	0.183	0.162	0.168	0.19	0.175	0.068	0.119	0.114	0.117	0.102	0.122	0.114	0.12	0.108		44.5	0.109	0.115	0.15	0.154	0.229	0.263	0.279	0.204	0.245	0.263	0.077	0.145	0.143	0.122	0.161	0.134	0.156
44.75	0.124	0.115	0.141	0.137	0.144	0.158	0.165	0.178	0.184	0.16	0.17	0.189	0.179	0.068	0.116	0.114	0.118	0.101	0.122	0.113	0.119	0.107		44.75	0.111	0.116	0.151	0.153	0.23	0.265	0.282	0.204	0.242	0.261	0.075	0.145	0.14	0.123	0.162	0.135	0.158
45	0.126	0.115	0.141	0.139	0.142	0.159	0.165	0.18	0.185	0.162	0.169	0.193	0.18	0.069	0.117	0.113	0.118	0.104	0.124	0.113	0.12	0.107		45	0.112	0.114	0.15	0.152	0.231	0.268	0.28	0.205	0.242	0.263	0.077	0.141	0.14	0.128	0.163	0.128	0.156
45.25	0.124	0.115	0.143	0.138	0.142	0.16	0.165	0.182	0.185	0.164	0.171	0.191	0.179	0.069	0.118	0.113	0.117	0.105	0.123	0.112	0.119	0.108		45.25	0.11	0.114	0.149	0.154	0.23	0.266	0.283	0.203	0.244	0.265	0.078	0.145	0.142	0.127	0.163	0.132	0.156
45.5	0.127	0.115	0.144	0.137	0.143	0.162	0.167	0.182	0.185	0.166	0.171	0.193	0.18	0.07	0.119	0.113	0.116	0.107	0.124	0.112	0.122	0.104		45.5	0.109	0.116	0.149	0.155	0.233	0.27	0.286	0.204	0.248	0.267	0.078	0.142	0.141	0.126	0.164	0.133	0.156
45.75	0.128	0.117	0.142	0.138	0.142	0.164	0.168	0.186	0.185	0.167	0.173	0.194	0.182	0.07	0.12	0.114	0.116	0.107	0.125	0.114	0.122	0.106		45.75	0.111	0.116	0.153	0.152	0.234	0.271	0.288	0.202	0.247	0.267	0.078	0.141	0.141	0.127	0.164	0.131	0.157
46	0.128	0.117	0.143	0.137	0.141	0.163	0.17	0.188	0.188	0.168	0.175	0.192	0.18	0.069	0.12	0.114	0.118	0.104	0.124	0.113	0.12	0.105		46	0.113	0.115	0.151	0.154	0.234	0.272	0.289	0.204	0.25	0.271	0.077	0.144	0.138	0.129	0.165	0.133	0.155
46.25	0.129	0.118	0.144	0.14	0.141	0.164	0.172	0.187	0.189	0.17	0.176	0.197	0.183	0.071	0.12	0.113	0.116	0.107	0.124	0.114	0.12	0.106		46.25	0.11	0.114	0.155	0.153	0.235	0.273	0.289	0.203	0.252	0.27	0.077	0.146	0.141	0.126	0.166	0.132	0.156
46.5	0.129	0.119	0.143	0.14	0.141	0.165	0.171	0.19	0.189	0.17	0.176	0.195	0.181	0.07	0.119	0.115	0.115	0.108	0.125	0.113	0.121	0.106		46.5	0.11	0.117	0.154	0.155	0.235	0.275	0.293	0.202	0.252	0.271	0.078	0.146	0.141	0.128	0.165	0.133	0.156
46.75	0.127	0.117	0.143	0.14	0.142	0.167	0.171	0.191	0.19	0.17	0.176	0.197	0.182	0.071	0.12	0.115	0.114	0.106	0.125	0.115	0.122	0.106		46.75	0.114	0.116	0.153	0.153	0.238	0.277	0.294	0.235	0.252	0.274	0.079	0.145	0.14	0.129	0.166	0.136	0.157
47	0.13	0.117	0.145	0.141	0.141	0.168	0.175	0.193	0.191	0.172	0.179	0.199	0.183	0.071	0.121	0.117	0.116	0.107	0.126	0.118	0.122	0.104		47	0.115	0.118	0.152	0.154	0.241	0.279	0.295	0.24	0.256	0.274	0.08	0.144	0.141	0.131	0.17	0.137	0.156
47.25	0.131	0.118	0.145	0.139	0.141	0.17	0.173	0.195	0.19	0.175	0.181	0.2	0.184	0.072	0.119	0.116	0.116	0.109	0.126	0.119	0.122	0.106		47.25	0.114	0.115	0.155	0.155	0.243	0.283	0.294	0.239	0.258	0.275	0.08	0.145	0.139	0.129	0.168	0.137	0.153
47.5	0.131	0.118	0.15	0.14	0.138	0.171	0.178	0.194	0.192	0.178	0.182	0.203	0.185	0.072	0.123	0.116	0.116	0.108	0.126	0.119	0.124	0.102		47.5	0.113	0.118	0.155	0.155	0.242	0.284	0.298	0.245	0.261	0.278	0.079	0.145	0.141	0.13	0.167	0.136	0.155
47.75	0.126	0.116	0.147	0.141	0.14	0.172	0.177	0.194	0.192	0.175	0.183	0.205	0.188	0.07	0.122	0.116	0.115	0.109	0.127	0.118	0.123	0.102		47.75	0.117	0.116	0.152	0.153	0.242	0.285	0.301	0.251	0.26	0.279	0.081	0.146	0.14	0.129	0.167	0.136	0.156
48	0.127	0.119	0.149	0.142	0.138	0.176	0.178	0.196	0.195	0.178	0.184	0.206	0.189	0.072	0.122	0.116	0.112	0.108	0.127	0.12	0.124	0.106		48	0.119	0.114	0.153	0.154	0.244	0.288	0.3	0.254	0.261	0.281	0.079	0.145	0.143	0.13	0.168	0.136	0.156
48.25	0.126	0.117	0.148	0.142	0.14	0.172	0.18	0.199	0.194	0.178	0.184	0.206	0.188	0.071	0.123	0.117	0.116	0.106	0.127	0.119	0.124	0.105		48.25	0.117	0.119	0.158	0.154	0.245	0.289	0.303	0.251	0.263	0.282	0.079	0.143	0.141	0.132	0.167	0.136	0.152
48.5	0.128	0.119	0.15	0.14	0.14	0.175	0.181	0.2	0.195	0.179	0.187	0.209	0.191	0.073	0.124	0.12	0.115	0.11	0.129	0.119	0.126	0.106		48.5	0.115	0.115	0.155	0.154	0.246	0.29	0.303	0.253	0.265	0.283	0.077	0.149	0.141	0.132	0.164	0.137	0.157
48.75	0.127	0.118	0.151	0.141	0.141	0.176	0.183	0.2	0.197	0.178	0.188	0.208	0.19	0.071	0.126	0.118	0.114	0.11	0.127	0.122	0.126	0.106		48.75	0.115	0.121	0.155	0.153	0.25	0.294	0.305	0.254	0.267	0.286	0.079	0.147	0.14	0.132	0.167	0.141	0.155
49	0.127	0.116	0.151	0.143	0.139	0.177	0.185	0.202	0.199	0.178	0.189	0.209	0.19	0.07	0.124	0.118	0.115	0.108	0.129	0.119	0.126	0.105		49	0.119	0.119	0.155	0.156	0.247	0.292	0.307	0.254	0.269	0.287	0.079	0.147	0.142	0.134	0.168	0.135	0.154
49.25	0.125	0.116	0.15	0.141	0.138	0.178	0.185	0.202	0.2	0.179	0.189	0.21	0.192	0.07	0.125	0.119	0.113	0.107	0.129	0.12	0.125	0.105		49.25	0.117	0.118	0.156	0.153	0.248	0.293	0.309	0.255	0.269	0.286	0.08	0.144	0.141	0.134	0.168	0.135	0.155
49.5	0.129	0.118	0.149	0.143	0.139	0.181	0.184	0.202	0.203	0.182	0.19	0.213	0.192	0.072	0.123	0.12	0.114	0.11	0.129	0.12	0.124	0.104		49.5	0.116	0.12	0.154	0.154	0.251	0.295	0.307	0.258	0.27	0.289	0.079	0.144	0.14	0.135	0.169	0.134	0.154
49.75	0.127	0.119	0.15	0.139	0.138	0.18	0.185	0.202	0.201	0.183	0.192	0.212	0.192	0.072	0.124	0.119	0.113	0.107	0.128	0.122	0.125	0.103		49.75	0.117	0.118	0.153	0.153	0.255	0.296	0.312	0.262	0.27	0.294	0.081	0.145	0.143	0.136	0.167	0.132	0.155
50	0.128	0.119	0.149	0.142	0.138	0.183	0.189	0.207	0.202	0.184	0.193	0.212	0.192	0.072	0.124	0.118	0.115	0.109	0.13	0.122	0.123	0.103		50	0.118	0.118	0.15	0.152	0.255	0.294	0.31	0.257	0.273	0.292	0.08	0.144	0.14	0.132	0.167	0.131	0.153
50.25	0.129	0.119	0.146	0.14	0.138	0.183	0.189	0.206	0.206	0.183	0.19	0.214	0.195	0.073	0.122	0.118	0.113	0.109	0.13	0.121	0.124	0.104		50.25	0.118	0.123	0.148	0.153	0.254	0.297	0.31	0.258	0.27	0.292	0.081	0.144	0.139	0.136	0.168	0.129	0.154
50.5	0.13	0.12	0.145	0.14	0.138	0.184	0.189	0.207	0.206	0.186	0.19	0.216	0.194	0.073	0.123	0.118	0.113	0.111	0.13	0.119	0.126	0.104		50.5	0.117	0.121	0.148	0.153	0.257	0.3	0.314	0.259	0.273	0.297	0.08	0.143	0.139	0.135	0.17	0.126	0.15
50.75	0.128	0.12	0.144	0.141	0.138	0.184	0.189	0.207	0.208	0.186	0.192	0.218	0.197	0.072	0.122	0.118	0.116	0.111	0.13	0.118	0.129	0.104		50.75	0.116	0.121	0.149	0.154	0.258	0.301	0.314	0.262	0.274	0.297	0.081	0.144	0.14	0.134	0.168	0.13	0.152
51	0.128	0.119	0.147	0.142	0.137	0.187	0.191	0.208	0.209	0.189	0.195	0.219	0.199	0.074	0.122	0.118	0.114	0.11	0.13	0.12	0.124	0.103		51	0.116	0.119	0.15	0.153	0.258	0.302	0.318	0.259	0.274	0.298	0.079	0.141	0.139	0.133	0.165	0.13	0.154
51.25	0.129	0.118	0.147	0.142	0.137	0.187	0.193	0.209	0.21	0.188	0.198	0.219	0.196	0.071	0.124	0.118	0.114	0.11	0.131	0.12	0.128	0.106		51.25	0.112	0.119	0.15	0.152	0.257	0.303	0.318	0.258	0.278	0.298	0.078	0.141	0.14	0.128	0.162	0.128	0.152
51.5	0.126	0.116	0.148	0.142	0.137	0.187	0.192	0.209	0.209	0.189	0.198	0.221	0.201	0.072	0.123	0.119	0.115	0.107	0.129	0.12	0.128	0.103		51.5	0.11	0.115	0.153	0.155	0.256	0.303	0.319	0.259	0.279	0.301	0.076	0.143	0.139	0.124	0.161	0.129	0.153
51.75	0.123	0.115	0.149	0.14	0.14	0.185	0.197	0.211	0.211	0.188	0.199	0.223	0.202	0.07	0.124	0.116	0.114	0.107	0.129	0.121	0.126	0.104		51.75	0.108	0.115	0.152	0.151	0.258	0.307	0.323	0.259	0.279	0.3	0.074	0.141	0.142	0.119	0.154	0.132	0.153
52	0.121	0.114	0.15	0.142	0.137	0.184	0.196	0.213	0.213	0.186	0.2	0.222	0.203	0.069	0.124	0.115	0.114	0.105	0.126	0.12	0.126	0.103		52	0.104	0.114	0.15	0.152	0.256	0.31	0.323	0.26	0.281	0.304	0.07	0.142	0.138	0.119	0.152	0.131	0.152
52.25	0.118	0.113	0.148	0.144	0.137	0.184	0.196	0.213	0.213	0.188	0.202	0.224	0.204	0.068	0.124	0.119	0.112	0.104	0.124	0.119	0.126	0.103		52.25	0.101	0.112	0.15	0.152	0.258	0.312	0.326	0.254	0.28	0.305	0.07	0.142	0.138	0.115	0.147	0.127	0.152
52.5	0.118	0.112	0.147	0.142	0.137	0.185	0.197	0.216	0.215	0.188	0.202	0.227	0.205	0.069	0.125	0.117	0.114	0.103	0.123	0.12	0.124	0.105		52.5	0.103	0.113	0.147	0.152	0.258	0.31	0.326	0.255	0.285	0.307	0.071	0.144	0.14	0.114	0.152	0.128	0.151
52.75	0.117	0.111	0.148	0.144	0.137	0.185	0.198	0.217	0.214	0.187	0.203	0.227	0.204	0.068	0.125	0.118	0.112	0.105	0.121	0.118	0.128	0.103		52.75	0.102	0.113	0.15	0.152	0.262	0.313	0.328	0.256	0.284	0.305	0.069	0.14	0.138	0.114	0.148	0.128	0.148
53	0.118	0.111	0.149	0.142	0.137	0.185	0.197	0.217	0.217	0.192	0.206	0.228	0.204	0.069	0.126	0.117	0.114	0.107	0.122	0.12	0.127	0.106		53	0.102	0.111	0.148	0.152	0.258	0.313	0.328	0.261	0.284	0.304	0.068	0.143	0.14	0.115	0.149	0.127	0.151
53.25	0.117	0.111	0.149	0.145	0.137	0.187	0.201	0.219	0.219	0.192	0.206	0.23	0.204	0.069	0.125	0.119	0.115	0.106	0.121	0.122	0.126	0.105		53.25	0.098	0.11	0.151	0.152	0.26	0.316	0.33	0.26	0.288	0.308	0.068	0.14	0.139	0.11	0.144	0.13	0.153
53.5	0.116	0.111	0.149	0.145	0.136	0.184	0.202	0.218	0.219	0.19	0.208	0.23	0.206	0.068	0.127	0.12	0.114	0.107	0.118	0.122	0.126	0.106		53.5	0.097	0.109	0.147	0.151	0.261	0.316	0.33	0.262	0.29	0.309	0.069	0.143	0.139	0.106	0.141	0.129	0.15
53.75	0.116	0.111	0.147	0.145	0.135	0.187	0.202	0.222	0.219	0.192	0.208	0.233	0.206	0.068	0.126	0.124	0.113	0.108	0.121	0.123	0.128	0.104		53.75	0.136	0.108	0.151	0.155	0.263	0.321	0.332	0.261	0.292	0.312	0.068	0.141	0.138	0.107	0.145	0.13	0.151
54	0.117	0.111	0.146	0.145	0.138	0.189	0.202	0.223	0.223	0.193	0.21	0.236	0.207	0.068	0.127	0.122	0.114	0.106	0.122	0.124	0.127	0.105		54	0.139	0.109	0.149	0.155	0.263	0.32	0.336	0.265	0.29	0.315	0.067	0.14	0.14	0.109	0.145	0.129	0.152
54.25	0.116	0.11	0.149	0.143	0.137	0.189	0.204	0.223	0.22	0.195	0.211	0.233	0.212	0.072	0.126	0.121	0.115	0.107	0.123	0.126	0.127	0.105		54.25	0.141	0.108	0.148	0.155	0.266	0.32	0.336	0.266	0.295	0.318	0.069	0.143	0.141	0.113	0.147	0.129	0.156
54.5	0.118	0.112	0.149	0.145	0.137	0.189	0.208	0.226	0.226	0.197	0.213	0.237	0.215	0.07	0.128	0.123	0.113	0.11	0.122	0.128	0.129	0.105		54.5	0.14	0.109	0.152	0.154	0.271	0.325	0.336	0.268	0.293	0.315	0.069	0.142	0.14	0.113	0.151	0.13	0.149
54.75	0.12	0.112	0.149	0.145	0.136	0.194	0.207	0.227	0.226	0.199	0.212	0.24	0.213	0.072	0.127	0.122	0.113	0.111	0.125	0.124	0.127	0.103		54.75	0.14	0.107	0.149	0.15	0.271	0.327	0.335	0.268	0.294	0.315	0.069	0.142	0.138	0.111	0.148	0.128	0.15
55	0.119	0.112	0.151	0.145	0.138	0.195	0.209	0.227	0.229	0.201	0.217	0.242	0.213	0.073	0.13	0.122	0.112	0.111	0.123	0.129	0.128	0.104		55	0.142	0.109	0.149	0.153	0.274	0.33	0.34	0.27	0.297	0.319	0.07	0.142	0.139	0.113	0.149	0.129	0.153
55.25	0.12	0.113	0.152	0.144	0.137	0.195	0.211	0.227	0.228	0.203	0.217	0.241	0.213	0.071	0.128	0.122	0.112	0.11	0.123	0.127	0.127	0.103		55.25	0.141	0.107	0.15	0.15	0.274	0.33	0.341	0.272	0.297	0.319	0.071	0.142	0.139	0.114	0.151	0.128	0.151
55.5	0.122	0.114	0.153	0.142	0.138	0.199	0.212	0.229	0.229	0.204	0.218	0.241	0.216	0.074	0.13	0.121	0.114	0.11	0.125	0.124	0.126	0.104		55.5	0.143	0.108	0.151	0.148	0.277	0.333	0.341	0.273	0.299	0.321	0.071	0.143	0.137	0.118	0.153	0.128	0.147
55.75	0.123	0.117	0.153	0.141	0.137	0.199	0.214	0.23	0.23	0.206	0.217	0.242	0.219	0.074	0.128	0.12	0.112	0.112	0.126	0.126	0.127	0.104		55.75	0.146	0.108	0.153	0.147	0.279	0.333	0.341	0.276	0.3	0.322	0.072	0.143	0.14	0.118	0.154	0.13	0.146
56	0.123	0.114	0.153	0.143	0.138	0.202	0.214	0.232	0.231	0.209	0.218	0.244	0.217	0.073	0.128	0.122	0.113	0.112	0.126	0.128	0.128	0.104		56	0.145	0.106	0.153	0.147	0.279	0.337	0.344	0.277	0.303	0.321	0.073	0.141	0.137	0.115	0.154	0.132	0.146
56.25	0.123	0.114	0.156	0.139	0.138	0.205	0.216	0.231	0.233	0.209	0.221	0.243	0.22	0.073	0.13	0.117	0.113	0.112	0.127	0.129	0.125	0.106		56.25	0.147	0.106	0.152	0.146	0.278	0.336	0.343	0.277	0.304	0.321	0.073	0.142	0.137	0.115	0.153	0.132	0.144
56.5	0.124	0.115	0.157	0.141	0.137	0.203	0.218	0.234	0.234	0.21	0.225	0.245	0.218	0.072	0.132	0.121	0.113	0.114	0.127	0.13	0.126	0.106		56.5	0.147	0.111	0.15	0.146	0.28	0.338	0.344	0.276	0.307	0.322	0.072	0.143	0.135	0.116	0.154	0.133	0.144
56.75	0.124	0.116	0.157	0.141	0.137	0.203	0.217	0.234	0.234	0.212	0.223	0.247	0.221	0.075	0.13	0.119	0.113	0.112	0.129	0.127	0.127	0.105		56.75	0.147	0.11	0.152	0.146	0.28	0.341	0.346	0.279	0.306	0.326	0.074	0.145	0.135	0.116	0.157	0.134	0.143
57	0.124	0.115	0.158	0.141	0.137	0.209	0.22	0.234	0.238	0.213	0.226	0.248	0.223	0.073	0.132	0.119	0.112	0.112	0.13	0.128	0.125	0.105		57	0.146	0.108	0.154	0.145	0.285	0.344	0.348	0.279	0.309	0.324	0.073	0.145	0.135	0.115	0.156	0.133	0.142
57.25	0.123	0.114	0.159	0.139	0.137	0.21	0.223	0.235	0.238	0.212	0.227	0.248	0.222	0.074	0.134	0.118	0.113	0.11	0.129	0.131	0.124	0.103		57.25	0.147	0.109	0.152	0.144	0.285	0.345	0.349	0.279	0.311	0.325	0.075	0.146	0.136	0.118	0.158	0.133	0.14
57.5	0.126	0.117	0.156	0.137	0.137	0.21	0.223	0.235	0.24	0.216	0.227	0.247	0.225	0.073	0.131	0.118	0.114	0.112	0.131	0.128	0.124	0.105		57.5	0.146	0.108	0.153	0.144	0.288	0.348	0.348	0.28	0.309	0.326	0.072	0.145	0.133	0.119	0.159	0.133	0.14
57.75	0.124	0.116	0.156	0.138	0.135	0.213	0.223	0.237	0.243	0.216	0.229	0.25	0.225	0.073	0.131	0.12	0.112	0.112	0.13	0.129	0.126	0.104		57.75	0.146	0.108	0.153	0.143	0.288	0.345	0.35	0.282	0.312	0.328	0.074	0.145	0.132	0.117	0.16	0.136	0.141
58	0.125	0.117	0.156	0.139	0.135	0.209	0.225	0.239	0.244	0.218	0.229	0.25	0.227	0.074	0.132	0.117	0.112	0.113	0.13	0.129	0.124	0.105		58	0.147	0.107	0.149	0.143	0.291	0.349	0.349	0.281	0.312	0.326	0.072	0.142	0.135	0.116	0.157	0.133	0.139
58.25	0.126	0.118	0.157	0.137	0.136	0.213	0.228	0.239	0.244	0.219	0.229	0.255	0.226	0.074	0.133	0.116	0.113	0.114	0.131	0.131	0.123	0.106		58.25	0.148	0.107	0.15	0.14	0.293	0.349	0.353	0.283	0.313	0.327	0.072	0.141	0.136	0.118	0.16	0.13	0.14
58.5	0.127	0.117	0.154	0.136	0.136	0.214	0.229	0.242	0.245	0.222	0.23	0.255	0.229	0.075	0.129	0.117	0.112	0.116	0.133	0.13	0.125	0.106		58.5	0.145	0.103	0.148	0.143	0.291	0.351	0.354	0.283	0.312	0.332	0.075	0.142	0.134	0.119	0.159	0.129	0.137
58.75	0.127	0.117	0.154	0.137	0.136	0.215	0.226	0.24	0.246	0.222	0.23	0.254	0.23	0.075	0.131	0.117	0.113	0.115	0.133	0.129	0.124	0.103		58.75	0.144	0.103	0.147	0.14	0.295	0.352	0.354	0.285	0.314	0.329	0.073	0.141	0.131	0.116	0.16	0.127	0.136
59	0.126	0.116	0.151	0.138	0.137	0.214	0.226	0.243	0.248	0.222	0.231	0.255	0.232	0.075	0.129	0.116	0.113	0.116	0.132	0.128	0.123	0.103		59	0.146	0.104	0.147	0.139	0.295	0.351	0.354	0.287	0.313	0.332	0.073	0.137	0.131	0.116	0.163	0.123	0.132
59.25	0.125	0.116	0.151	0.137	0.138	0.213	0.225	0.241	0.252	0.224	0.23	0.255	0.233	0.073	0.127	0.115	0.113	0.114	0.131	0.128	0.123	0.106		59.25	0.147	0.104	0.145	0.139	0.295	0.351	0.357	0.289	0.315	0.33	0.088	0.136	0.133	0.116	0.158	0.119	0.132
59.5	0.128	0.118	0.148	0.137	0.139	0.216	0.226	0.246	0.252	0.224	0.232	0.259	0.235	0.075	0.126	0.116	0.114	0.118	0.133	0.126	0.123	0.107		59.5	0.143	0.108	0.146	0.138	0.296	0.354	0.356	0.289	0.315	0.333	0.088	0.137	0.133	0.116	0.161	0.12	0.133
59.75	0.127	0.118	0.149	0.134	0.136	0.218	0.23	0.245	0.251	0.226	0.236	0.259	0.235	0.073	0.127	0.115	0.112	0.117	0.133	0.128	0.125	0.106		59.75	0.144	0.109	0.145	0.137	0.296	0.353	0.359	0.291	0.318	0.333	0.086	0.136	0.132	0.117	0.16	0.123	0.131
60	0.126	0.118	0.149	0.133	0.138	0.216	0.23	0.247	0.254	0.227	0.234	0.261	0.237	0.074	0.129	0.115	0.113	0.119	0.135	0.126	0.126	0.106		60	0.142	0.107	0.145	0.139	0.299	0.356	0.357	0.292	0.318	0.337	0.085	0.136	0.135	0.116	0.16	0.123	0.131
60.25	0.127	0.116	0.151	0.135	0.134	0.218	0.23	0.248	0.256	0.227	0.236	0.261	0.239	0.074	0.129	0.115	0.111	0.118	0.133	0.13	0.125	0.105		60.25	0.144	0.107	0.146	0.138	0.301	0.356	0.362	0.29	0.321	0.335	0.085	0.137	0.134	0.118	0.16	0.125	0.132
60.5	0.126	0.117	0.149	0.133	0.137	0.217	0.233	0.248	0.259	0.231	0.238	0.264	0.24	0.076	0.127	0.115	0.112	0.117	0.134	0.129	0.128	0.106		60.5	0.145	0.107	0.148	0.138	0.302	0.359	0.362	0.291	0.324	0.339	0.088	0.138	0.133	0.115	0.161	0.124	0.132
60.75	0.126	0.119	0.154	0.133	0.136	0.219	0.234	0.248	0.259	0.229	0.241	0.263	0.239	0.075	0.131	0.115	0.112	0.118	0.133	0.131	0.129	0.104		60.75	0.143	0.104	0.149	0.139	0.303	0.361	0.363	0.291	0.325	0.339	0.087	0.139	0.135	0.117	0.158	0.126	0.129
61	0.127	0.118	0.152	0.134	0.135	0.229	0.237	0.252	0.262	0.231	0.241	0.264	0.241	0.077	0.131	0.114	0.11	0.118	0.134	0.129	0.128	0.104		61	0.14	0.103	0.148	0.137	0.302	0.365	0.363	0.293	0.325	0.339	0.086	0.139	0.131	0.115	0.157	0.128	0.131
61.25	0.124	0.117	0.154	0.134	0.139	0.228	0.24	0.252	0.265	0.23	0.241	0.265	0.243	0.074	0.134	0.115	0.113	0.115	0.133	0.131	0.129	0.106		61.25	0.141	0.103	0.15	0.135	0.303	0.367	0.364	0.294	0.328	0.34	0.087	0.14	0.131	0.115	0.159	0.13	0.128
61.5	0.127	0.117	0.155	0.134	0.14	0.229	0.243	0.255	0.271	0.233	0.246	0.268	0.249	0.074	0.133	0.116	0.118	0.117	0.135	0.132	0.127	0.109		61.5	0.143	0.103	0.15	0.136	0.306	0.368	0.367	0.292	0.329	0.341	0.088	0.14	0.131	0.116	0.158	0.131	0.13
61.75	0.123	0.115	0.155	0.134	0.146	0.228	0.245	0.255	0.274	0.232	0.245	0.268	0.25	0.072	0.134	0.116	0.12	0.115	0.134	0.13	0.128	0.113		61.75	0.141	0.099	0.151	0.135	0.303	0.37	0.365	0.293	0.331	0.344	0.086	0.141	0.132	0.115	0.156	0.13	0.129
62	0.123	0.117	0.155	0.134	0.146	0.23	0.246	0.255	0.275	0.234	0.246	0.27	0.252	0.072	0.134	0.116	0.121	0.116	0.134	0.132	0.129	0.112		62	0.139	0.099	0.151	0.137	0.305	0.371	0.368	0.294	0.331	0.343	0.086	0.143	0.131	0.112	0.158	0.131	0.13
62.25	0.125	0.116	0.154	0.132	0.151	0.227	0.249	0.255	0.28	0.236	0.25	0.272	0.257	0.074	0.136	0.117	0.123	0.115	0.134	0.132	0.128	0.116		62.25	0.137	0.098	0.151	0.133	0.303	0.371	0.369	0.295	0.332	0.345	0.084	0.14	0.133	0.11	0.154	0.131	0.128
62.5	0.124	0.115	0.153	0.133	0.15	0.227	0.25	0.259	0.283	0.24	0.251	0.274	0.259	0.071	0.134	0.116	0.125	0.116	0.134	0.13	0.129	0.117		62.5	0.137	0.098	0.151	0.136	0.307	0.372	0.37	0.297	0.335	0.345	0.086	0.142	0.132	0.113	0.152	0.131	0.127
62.75	0.123	0.115	0.153	0.129	0.153	0.231	0.248	0.258	0.285	0.24	0.252	0.274	0.261	0.072	0.136	0.116	0.127	0.115	0.133	0.132	0.126	0.122		62.75	0.144	0.098	0.149	0.137	0.308	0.372	0.371	0.298	0.334	0.345	0.083	0.142	0.131	0.11	0.153	0.13	0.127
63	0.123	0.114	0.155	0.13	0.155	0.233	0.249	0.259	0.29	0.242	0.253	0.272	0.261	0.071	0.134	0.116	0.128	0.115	0.134	0.133	0.126	0.125		63	0.141	0.099	0.151	0.136	0.308	0.375	0.373	0.297	0.336	0.346	0.084	0.141	0.132	0.11	0.154	0.129	0.129
63.25	0.121	0.113	0.153	0.129	0.156	0.231	0.251	0.262	0.293	0.243	0.258	0.275	0.266	0.07	0.135	0.115	0.129	0.114	0.132	0.13	0.127	0.124		63.25	0.14	0.097	0.15	0.134	0.312	0.375	0.374	0.302	0.337	0.348	0.085	0.139	0.131	0.112	0.152	0.13	0.125
63.5	0.122	0.115	0.152	0.128	0.157	0.233	0.255	0.263	0.295	0.241	0.258	0.277	0.266	0.07	0.135	0.116	0.13	0.115	0.132	0.132	0.126	0.125		63.5	0.138	0.097	0.15	0.134	0.309	0.378	0.376	0.302	0.339	0.349	0.084	0.141	0.132	0.108	0.153	0.129	0.128
63.75	0.121	0.113	0.154	0.128	0.16	0.231	0.254	0.263	0.296	0.245	0.261	0.278	0.27	0.071	0.136	0.113	0.125	0.114	0.132	0.133	0.125	0.128		63.75	0.138	0.096	0.149	0.133	0.311	0.38	0.376	0.301	0.341	0.349	0.083	0.141	0.131	0.111	0.153	0.13	0.126
64	0.121	0.113	0.152	0.126	0.157	0.233	0.256	0.265	0.298	0.244	0.263	0.278	0.27	0.073	0.136	0.113	0.128	0.114	0.134	0.13	0.127	0.129		64	0.137	0.099	0.148	0.134	0.313	0.379	0.377	0.302	0.341	0.351	0.084	0.142	0.13	0.111	0.152	0.128	0.124
64.25	0.124	0.114	0.153	0.129	0.16	0.235	0.259	0.268	0.299	0.245	0.265	0.28	0.271	0.073	0.135	0.114	0.129	0.115	0.137	0.129	0.129	0.131		64.25	0.139	0.098	0.148	0.135	0.312	0.381	0.379	0.302	0.34	0.351	0.083	0.142	0.131	0.111	0.152	0.126	0.129
64.5	0.121	0.114	0.151	0.134	0.163	0.243	0.259	0.273	0.304	0.248	0.266	0.285	0.275	0.075	0.136	0.118	0.13	0.113	0.136	0.13	0.132	0.132		64.5	0.144	0.096	0.145	0.137	0.316	0.38	0.38	0.304	0.345	0.356	0.085	0.139	0.133	0.113	0.156	0.127	0.133
64.75	0.123	0.114	0.151	0.135	0.162	0.244	0.261	0.275	0.305	0.247	0.269	0.286	0.273	0.075	0.136	0.119	0.131	0.115	0.139	0.129	0.133	0.131		64.75	0.142	0.099	0.148	0.139	0.317	0.382	0.384	0.305	0.342	0.357	0.096	0.138	0.133	0.114	0.159	0.128	0.133
65	0.125	0.114	0.15	0.138	0.165	0.248	0.261	0.277	0.307	0.252	0.27	0.289	0.276	0.075	0.136	0.12	0.131	0.116	0.139	0.13	0.135	0.136		65	0.143	0.099	0.148	0.139	0.319	0.383	0.385	0.307	0.341	0.362	0.097	0.138	0.136	0.117	0.16	0.127	0.132
65.25	0.124	0.115	0.151	0.137	0.166	0.246	0.261	0.28	0.31	0.253	0.267	0.29	0.279	0.075	0.134	0.122	0.133	0.115	0.141	0.128	0.136	0.134		65.25	0.143	0.099	0.144	0.142	0.319	0.383	0.388	0.311	0.345	0.361	0.099	0.138	0.138	0.118	0.159	0.125	0.137
65.5	0.124	0.117	0.151	0.138	0.165	0.248	0.265	0.283	0.312	0.254	0.272	0.294	0.281	0.077	0.135	0.121	0.134	0.116	0.142	0.131	0.135	0.135		65.5	0.145	0.098	0.146	0.143	0.321	0.386	0.39	0.313	0.346	0.365	0.097	0.139	0.14	0.118	0.161	0.125	0.139
65.75	0.127	0.119	0.151	0.137	0.167	0.25	0.264	0.284	0.313	0.256	0.271	0.295	0.28	0.077	0.136	0.122	0.135	0.118	0.143	0.131	0.136	0.135		65.75	0.143	0.101	0.148	0.142	0.323	0.387	0.391	0.317	0.347	0.366	0.098	0.138	0.14	0.119	0.16	0.127	0.139
66	0.124	0.117	0.149	0.139	0.167	0.258	0.266	0.285	0.316	0.258	0.273	0.298	0.285	0.076	0.134	0.124	0.136	0.116	0.143	0.132	0.139	0.136		66	0.143	0.102	0.146	0.144	0.323	0.389	0.393	0.318	0.347	0.368	0.099	0.14	0.14	0.118	0.159	0.127	0.139
66.25	0.127	0.118	0.15	0.138	0.166	0.259	0.266	0.288	0.316	0.256	0.275	0.299	0.285	0.077	0.135	0.126	0.132	0.119	0.141	0.133	0.136	0.135		66.25	0.149	0.101	0.147	0.145	0.324	0.39	0.394	0.318	0.35	0.367	0.097	0.139	0.139	0.123	0.161	0.129	0.14
66.5	0.127	0.117	0.151	0.14	0.164	0.262	0.268	0.289	0.322	0.261	0.278	0.302	0.289	0.077	0.138	0.126	0.133	0.118	0.143	0.135	0.139	0.138		66.5	0.145	0.1	0.147	0.145	0.323	0.391	0.395	0.319	0.35	0.37	0.097	0.14	0.139	0.124	0.159	0.131	0.14
66.75	0.124	0.117	0.149	0.139	0.163	0.265	0.272	0.293	0.32	0.261	0.276	0.3	0.29	0.076	0.138	0.124	0.132	0.119	0.141	0.133	0.138	0.135		66.75	0.142	0.101	0.147	0.144	0.325	0.392	0.396	0.32	0.353	0.37	0.096	0.14	0.14	0.125	0.158	0.129	0.142
67	0.127	0.116	0.15	0.142	0.162	0.264	0.271	0.296	0.321	0.26	0.281	0.304	0.289	0.076	0.138	0.126	0.131	0.118	0.145	0.134	0.14	0.133		67	0.143	0.099	0.15	0.148	0.324	0.393	0.398	0.32	0.353	0.371	0.097	0.14	0.14	0.123	0.159	0.128	0.146
67.25	0.126	0.117	0.151	0.141	0.162	0.266	0.27	0.297	0.323	0.263	0.282	0.305	0.29	0.076	0.136	0.124	0.133	0.117	0.144	0.135	0.14	0.135		67.25	0.142	0.101	0.149	0.149	0.324	0.394	0.401	0.322	0.353	0.374	0.095	0.139	0.143	0.122	0.158	0.131	0.147
67.5	0.125	0.117	0.15	0.144	0.158	0.264	0.275	0.301	0.323	0.263	0.282	0.31	0.289	0.077	0.139	0.129	0.127	0.118	0.144	0.135	0.141	0.132		67.5	0.143	0.097	0.149	0.149	0.323	0.394	0.404	0.32	0.355	0.375	0.093	0.139	0.141	0.117	0.153	0.127	0.149
67.75	0.121	0.114	0.152	0.143	0.154	0.262	0.275	0.301	0.324	0.265	0.285	0.312	0.29	0.073	0.139	0.129	0.127	0.113	0.141	0.136	0.142	0.131		67.75	0.14	0.098	0.146	0.151	0.325	0.399	0.404	0.318	0.356	0.375	0.093	0.141	0.145	0.119	0.15	0.13	0.147
68	0.121	0.112	0.149	0.142	0.153	0.261	0.278	0.302	0.324	0.264	0.286	0.313	0.292	0.071	0.138	0.13	0.126	0.113	0.14	0.137	0.142	0.129		68	0.136	0.098	0.148	0.149	0.325	0.398	0.406	0.319	0.361	0.379	0.092	0.14	0.145	0.112	0.146	0.127	0.146
68.25	0.121	0.111	0.15	0.14	0.151	0.261	0.279	0.301	0.324	0.264	0.29	0.312	0.29	0.072	0.139	0.127	0.125	0.112	0.14	0.138	0.14	0.126		68.25	0.136	0.098	0.147	0.15	0.323	0.398	0.407	0.321	0.359	0.38	0.092	0.14	0.145	0.112	0.149	0.129	0.151
68.5	0.117	0.11	0.151	0.139	0.149	0.263	0.281	0.303	0.325	0.266	0.29	0.317	0.293	0.07	0.137	0.128	0.123	0.11	0.138	0.138	0.141	0.125		68.5	0.138	0.097	0.149	0.149	0.328	0.398	0.409	0.321	0.358	0.382	0.092	0.14	0.146	0.113	0.147	0.13	0.149
68.75	0.118	0.111	0.151	0.14	0.149	0.264	0.283	0.305	0.324	0.266	0.291	0.314	0.293	0.071	0.139	0.128	0.123	0.114	0.14	0.139	0.141	0.127		68.75	0.137	0.099	0.148	0.151	0.33	0.402	0.409	0.324	0.361	0.383	0.094	0.142	0.144	0.116	0.151	0.132	0.148
69	0.121	0.112	0.151	0.141	0.145	0.27	0.285	0.307	0.329	0.273	0.292	0.316	0.294	0.076	0.139	0.13	0.124	0.115	0.14	0.141	0.141	0.124		69	0.137	0.099	0.147	0.152	0.33	0.402	0.41	0.324	0.36	0.383	0.094	0.139	0.145	0.117	0.153	0.127	0.147
69.25	0.122	0.112	0.151	0.139	0.145	0.267	0.285	0.308	0.33	0.274	0.299	0.317	0.296	0.075	0.141	0.127	0.126	0.115	0.144	0.142	0.141	0.129		69.25	0.138	0.1	0.148	0.152	0.331	0.402	0.412	0.327	0.363	0.386	0.094	0.141	0.146	0.118	0.152	0.13	0.147
69.5	0.122	0.112	0.149	0.142	0.145	0.27	0.286	0.31	0.33	0.275	0.3	0.321	0.299	0.075	0.138	0.128	0.124	0.114	0.143	0.141	0.141	0.127		69.5	0.138	0.101	0.147	0.154	0.332	0.404	0.412	0.327	0.365	0.386	0.095	0.141	0.145	0.121	0.157	0.129	0.152
69.75	0.124	0.113	0.15	0.141	0.147	0.278	0.289	0.312	0.334	0.278	0.301	0.324	0.299	0.075	0.139	0.128	0.127	0.115	0.141	0.141	0.142	0.127		69.75	0.138	0.103	0.147	0.152	0.334	0.407	0.411	0.326	0.365	0.385	0.096	0.141	0.148	0.119	0.159	0.132	0.151
70	0.126	0.114	0.151	0.141	0.146	0.283	0.29	0.316	0.337	0.279	0.305	0.324	0.302	0.077	0.139	0.126	0.127	0.116	0.143	0.142	0.144	0.128		70	0.142	0.101	0.148	0.152	0.335	0.405	0.416	0.331	0.366	0.388	0.096	0.138	0.147	0.122	0.159	0.13	0.151
70.25	0.125	0.115	0.15	0.141	0.145	0.281	0.291	0.314	0.339	0.281	0.302	0.325	0.303	0.077	0.139	0.13	0.128	0.119	0.144	0.147	0.144	0.128		70.25	0.142	0.101	0.146	0.152	0.335	0.408	0.416	0.331	0.367	0.388	0.096	0.138	0.147	0.12	0.156	0.129	0.148
70.5	0.126	0.115	0.15	0.141	0.146	0.282	0.292	0.318	0.341	0.284	0.306	0.328	0.306	0.077	0.139	0.128	0.13	0.117	0.144	0.147	0.143	0.13		70.5	0.14	0.104	0.148	0.151	0.337	0.408	0.419	0.332	0.366	0.389	0.097	0.14	0.148	0.123	0.159	0.129	0.153
70.75	0.126	0.115	0.149	0.141	0.147	0.283	0.292	0.319	0.344	0.283	0.308	0.331	0.306	0.077	0.137	0.128	0.133	0.12	0.145	0.145	0.142	0.129		70.75	0.144	0.106	0.146	0.15	0.337	0.408	0.418	0.333	0.369	0.389	0.098	0.138	0.147	0.124	0.159	0.129	0.149
71	0.125	0.116	0.151	0.14	0.148	0.284	0.297	0.319	0.346	0.286	0.311	0.33	0.311	0.077	0.139	0.128	0.134	0.121	0.147	0.144	0.141	0.13		71	0.146	0.105	0.148	0.153	0.339	0.411	0.422	0.333	0.37	0.391	0.099	0.14	0.146	0.123	0.158	0.128	0.151
71.25	0.125	0.114	0.152	0.141	0.148	0.284	0.298	0.323	0.349	0.288	0.314	0.33	0.311	0.079	0.141	0.128	0.132	0.121	0.144	0.147	0.144	0.129		71.25	0.149	0.107	0.147	0.154	0.34	0.409	0.423	0.333	0.374	0.393	0.098	0.139	0.146	0.126	0.158	0.129	0.153
71.5	0.126	0.115	0.151	0.141	0.148	0.285	0.301	0.325	0.349	0.293	0.315	0.336	0.314	0.078	0.141	0.13	0.132	0.12	0.146	0.149	0.142	0.125		71.5	0.147	0.105	0.147	0.153	0.339	0.412	0.425	0.336	0.371	0.396	0.1	0.141	0.148	0.125	0.161	0.132	0.152
71.75	0.126	0.114	0.153	0.143	0.151	0.287	0.303	0.326	0.352	0.292	0.317	0.337	0.316	0.078	0.139	0.13	0.135	0.125	0.145	0.144	0.143	0.129		71.75	0.145	0.105	0.148	0.156	0.338	0.414	0.423	0.336	0.372	0.396	0.098	0.14	0.148	0.124	0.159	0.128	0.154
72	0.127	0.114	0.15	0.142	0.151	0.287	0.302	0.329	0.355	0.292	0.317	0.338	0.317	0.079	0.138	0.128	0.134	0.125	0.146	0.145	0.143	0.128		72	0.144	0.103	0.147	0.156	0.34	0.414	0.425	0.336	0.373	0.395	0.098	0.14	0.148	0.126	0.163	0.128	0.156
72.25	0.126	0.113	0.151	0.146	0.151	0.286	0.304	0.33	0.357	0.294	0.318	0.34	0.317	0.077	0.137	0.131	0.134	0.124	0.147	0.146	0.141	0.132		72.25	0.146	0.103	0.146	0.153	0.341	0.416	0.427	0.337	0.374	0.398	0.098	0.139	0.147	0.124	0.158	0.127	0.151
72.5	0.126	0.115	0.151	0.144	0.153	0.295	0.305	0.333	0.361	0.295	0.32	0.342	0.32	0.077	0.139	0.131	0.133	0.125	0.148	0.145	0.143	0.132		72.5	0.141	0.103	0.147	0.153	0.341	0.417	0.427	0.338	0.375	0.398	0.097	0.141	0.147	0.12	0.156	0.128	0.153
72.75	0.122	0.113	0.151	0.144	0.155	0.293	0.309	0.331	0.361	0.294	0.319	0.343	0.323	0.076	0.139	0.132	0.135	0.123	0.146	0.147	0.143	0.132		72.75	0.139	0.107	0.146	0.154	0.341	0.417	0.429	0.335	0.376	0.399	0.093	0.139	0.149	0.118	0.151	0.127	0.155
73	0.123	0.11	0.153	0.143	0.152	0.296	0.309	0.334	0.366	0.301	0.323	0.346	0.323	0.078	0.136	0.133	0.134	0.122	0.147	0.146	0.144	0.131		73	0.137	0.103	0.145	0.155	0.341	0.418	0.431	0.334	0.375	0.402	0.093	0.141	0.149	0.114	0.147	0.129	0.154
73.25	0.121	0.11	0.152	0.144	0.149	0.297	0.308	0.337	0.364	0.303	0.325	0.345	0.325	0.076	0.137	0.134	0.132	0.121	0.144	0.144	0.143	0.131		73.25	0.138	0.105	0.145	0.154	0.338	0.418	0.431	0.333	0.375	0.402	0.093	0.139	0.148	0.115	0.147	0.126	0.152
73.5	0.119	0.109	0.152	0.146	0.154	0.294	0.312	0.339	0.368	0.303	0.328	0.35	0.328	0.074	0.139	0.132	0.133	0.119	0.144	0.145	0.144	0.135		73.5	0.138	0.102	0.147	0.154	0.34	0.42	0.432	0.335	0.376	0.401	0.093	0.14	0.15	0.112	0.148	0.128	0.155
73.75	0.121	0.107	0.15	0.145	0.152	0.293	0.312	0.341	0.368	0.301	0.328	0.351	0.33	0.076	0.138	0.132	0.133	0.118	0.145	0.146	0.146	0.133		73.75	0.134	0.105	0.147	0.155	0.341	0.422	0.432	0.336	0.379	0.401	0.094	0.14	0.15	0.114	0.146	0.129	0.151
74	0.121	0.108	0.152	0.144	0.154	0.298	0.314	0.342	0.372	0.302	0.33	0.351	0.332	0.073	0.14	0.132	0.131	0.118	0.145	0.145	0.144	0.131		74	0.137	0.103	0.145	0.156	0.342	0.423	0.436	0.335	0.379	0.403	0.093	0.138	0.149	0.114	0.149	0.13	0.153
74.25	0.12	0.108	0.151	0.145	0.154	0.294	0.316	0.344	0.371	0.304	0.331	0.355	0.332	0.074	0.137	0.131	0.13	0.119	0.143	0.145	0.143	0.129		74.25	0.138	0.104	0.144	0.154	0.342	0.423	0.436	0.336	0.378	0.404	0.094	0.139	0.147	0.114	0.149	0.127	0.154
74.5	0.122	0.109	0.152	0.143	0.152	0.296	0.318	0.343	0.373	0.306	0.329	0.356	0.333	0.075	0.138	0.13	0.128	0.121	0.146	0.145	0.143	0.128		74.5	0.137	0.106	0.146	0.153	0.342	0.424	0.436	0.336	0.381	0.406	0.094	0.141	0.148	0.118	0.148	0.125	0.152
74.75	0.122	0.108	0.151	0.141	0.148	0.299	0.319	0.345	0.375	0.307	0.333	0.357	0.333	0.076	0.136	0.13	0.128	0.12	0.143	0.144	0.142	0.127		74.75	0.135	0.105	0.145	0.152	0.345	0.425	0.437	0.337	0.383	0.406	0.093	0.142	0.149	0.115	0.149	0.127	0.155
75	0.12	0.108	0.155	0.143	0.149	0.302	0.321	0.345	0.377	0.308	0.334	0.36	0.336	0.074	0.14	0.128	0.128	0.119	0.141	0.145	0.142	0.124		75	0.14	0.105	0.148	0.153	0.345	0.427	0.438	0.34	0.382	0.408	0.093	0.141	0.146	0.118	0.149	0.129	0.15
75.25	0.121	0.114	0.153	0.143	0.147	0.305	0.322	0.349	0.379	0.311	0.335	0.358	0.335	0.076	0.137	0.129	0.129	0.12	0.147	0.146	0.14	0.122		75.25	0.139	0.107	0.146	0.149	0.347	0.427	0.437	0.34	0.382	0.407	0.095	0.142	0.147	0.118	0.153	0.13	0.149
75.5	0.123	0.112	0.151	0.142	0.146	0.307	0.322	0.349	0.382	0.314	0.338	0.361	0.337	0.077	0.136	0.128	0.126	0.121	0.146	0.145	0.14	0.121		75.5	0.143	0.108	0.146	0.153	0.346	0.428	0.438	0.343	0.382	0.406	0.094	0.143	0.147	0.118	0.152	0.129	0.15
75.75	0.122	0.114	0.152	0.142	0.144	0.307	0.325	0.35	0.38	0.314	0.338	0.363	0.338	0.076	0.139	0.13	0.125	0.12	0.145	0.146	0.141	0.12		75.75	0.141	0.104	0.145	0.153	0.359	0.431	0.437	0.345	0.384	0.408	0.095	0.139	0.145	0.12	0.155	0.13	0.149
76	0.122	0.111	0.153	0.142	0.148	0.31	0.327	0.355	0.384	0.316	0.341	0.364	0.34	0.077	0.138	0.13	0.128	0.12	0.145	0.147	0.139	0.124		76	0.145	0.107	0.149	0.15	0.36	0.43	0.44	0.345	0.385	0.41	0.096	0.141	0.148	0.12	0.152	0.13	0.147
76.25	0.122	0.113	0.156	0.142	0.149	0.313	0.329	0.355	0.386	0.317	0.342	0.367	0.343	0.076	0.136	0.13	0.128	0.12	0.149	0.145	0.142	0.122		76.25	0.143	0.108	0.145	0.149	0.362	0.431	0.44	0.345	0.386	0.41	0.096	0.142	0.148	0.119	0.155	0.129	0.148
76.5	0.125	0.114	0.152	0.142	0.15	0.315	0.328	0.356	0.389	0.32	0.346	0.37	0.345	0.077	0.135	0.129	0.126	0.122	0.149	0.147	0.142	0.121		76.5	0.145	0.109	0.144	0.149	0.363	0.433	0.443	0.346	0.387	0.412	0.096	0.142	0.147	0.123	0.155	0.13	0.146
76.75	0.123	0.113	0.153	0.139	0.154	0.316	0.332	0.355	0.394	0.32	0.349	0.37	0.35	0.078	0.139	0.126	0.131	0.123	0.148	0.145	0.139	0.126		76.75	0.143	0.108	0.146	0.148	0.363	0.434	0.441	0.349	0.386	0.412	0.097	0.142	0.147	0.122	0.156	0.13	0.147
77	0.122	0.113	0.154	0.141	0.152	0.316	0.335	0.362	0.394	0.323	0.351	0.374	0.351	0.077	0.139	0.127	0.131	0.12	0.151	0.147	0.142	0.123		77	0.143	0.109	0.147	0.151	0.364	0.434	0.443	0.347	0.387	0.414	0.096	0.141	0.145	0.122	0.158	0.132	0.146
77.25	0.125	0.111	0.154	0.143	0.154	0.318	0.333	0.363	0.399	0.322	0.352	0.374	0.353	0.078	0.138	0.127	0.132	0.122	0.147	0.145	0.141	0.123		77.25	0.145	0.108	0.148	0.149	0.363	0.435	0.441	0.347	0.389	0.415	0.096	0.143	0.146	0.121	0.156	0.133	0.145
77.5	0.128	0.113	0.154	0.142	0.158	0.32	0.337	0.365	0.403	0.326	0.354	0.376	0.356	0.077	0.139	0.127	0.132	0.123	0.149	0.146	0.142	0.123		77.5	0.145	0.111	0.147	0.15	0.364	0.438	0.443	0.348	0.389	0.414	0.097	0.145	0.146	0.124	0.157	0.132	0.144
77.75	0.126	0.113	0.155	0.141	0.155	0.322	0.338	0.367	0.403	0.327	0.356	0.379	0.357	0.079	0.141	0.127	0.131	0.122	0.148	0.149	0.141	0.124		77.75	0.146	0.112	0.145	0.147	0.367	0.437	0.446	0.351	0.391	0.415	0.099	0.141	0.148	0.122	0.16	0.132	0.147
78	0.127	0.115	0.154	0.144	0.157	0.323	0.341	0.37	0.406	0.33	0.355	0.379	0.36	0.08	0.139	0.127	0.131	0.125	0.152	0.148	0.142	0.124		78	0.143	0.11	0.148	0.147	0.368	0.437	0.446	0.35	0.392	0.415	0.098	0.142	0.147	0.123	0.156	0.13	0.146
78.25	0.125	0.113	0.157	0.142	0.157	0.325	0.34	0.372	0.409	0.329	0.359	0.383	0.361	0.08	0.141	0.127	0.131	0.122	0.152	0.148	0.14	0.126		78.25	0.148	0.109	0.148	0.151	0.367	0.437	0.449	0.353	0.39	0.417	0.097	0.141	0.146	0.124	0.16	0.13	0.147
78.5	0.127	0.113	0.154	0.14	0.159	0.328	0.345	0.371	0.412	0.334	0.359	0.385	0.365	0.08	0.14	0.126	0.131	0.121	0.151	0.147	0.14	0.126		78.5	0.149	0.113	0.147	0.15	0.369	0.439	0.449	0.351	0.395	0.418	0.098	0.145	0.148	0.126	0.158	0.13	0.148
78.75	0.126	0.115	0.158	0.141	0.159	0.331	0.347	0.374	0.416	0.334	0.361	0.386	0.365	0.079	0.139	0.126	0.133	0.121	0.15	0.15	0.139	0.125		78.75	0.146	0.113	0.144	0.149	0.37	0.438	0.45	0.352	0.394	0.418	0.098	0.142	0.147	0.125	0.161	0.13	0.149
79	0.127	0.112	0.156	0.143	0.159	0.331	0.348	0.377	0.418	0.335	0.363	0.389	0.367	0.079	0.139	0.128	0.131	0.122	0.151	0.147	0.14	0.127		79	0.147	0.108	0.145	0.151	0.368	0.441	0.452	0.352	0.394	0.42	0.097	0.143	0.148	0.123	0.16	0.129	0.147
79.25	0.128	0.114	0.156	0.144	0.16	0.334	0.349	0.379	0.421	0.335	0.365	0.392	0.371	0.08	0.139	0.126	0.131	0.125	0.152	0.148	0.138	0.129		79.25	0.147	0.112	0.147	0.151	0.37	0.439	0.453	0.356	0.396	0.423	0.099	0.145	0.149	0.124	0.162	0.132	0.148
79.5	0.128	0.115	0.155	0.142	0.155	0.336	0.353	0.383	0.418	0.341	0.367	0.392	0.373	0.08	0.138	0.127	0.132	0.123	0.152	0.146	0.137	0.128		79.5	0.145	0.11	0.145	0.149	0.37	0.439	0.452	0.355	0.395	0.42	0.099	0.14	0.148	0.125	0.159	0.13	0.148
79.75	0.129	0.115	0.156	0.144	0.154	0.337	0.352	0.384	0.421	0.341	0.366	0.395	0.369	0.082	0.139	0.126	0.129	0.124	0.151	0.147	0.136	0.124		79.75	0.147	0.109	0.143	0.152	0.372	0.441	0.454	0.355	0.393	0.422	0.098	0.141	0.146	0.127	0.159	0.129	0.149
80	0.13	0.115	0.154	0.144	0.154	0.338	0.353	0.387	0.422	0.341	0.37	0.398	0.373	0.081	0.137	0.126	0.128	0.124	0.149	0.146	0.137	0.123		80	0.149	0.111	0.144	0.151	0.372	0.444	0.453	0.355	0.397	0.424	0.098	0.142	0.147	0.124	0.159	0.13	0.149
80.25	0.128	0.117	0.155	0.143	0.152	0.339	0.354	0.388	0.422	0.341	0.369	0.399	0.374	0.081	0.138	0.125	0.126	0.124	0.15	0.147	0.138	0.122		80.25	0.147	0.109	0.144	0.15	0.373	0.444	0.455	0.355	0.396	0.424	0.099	0.144	0.147	0.126	0.159	0.129	0.15
80.5	0.131	0.115	0.156	0.143	0.152	0.341	0.357	0.39	0.425	0.345	0.374	0.401	0.377	0.082	0.136	0.124	0.128	0.123	0.152	0.147	0.136	0.126		80.5	0.146	0.11	0.143	0.151	0.372	0.449	0.457	0.358	0.395	0.426	0.1	0.141	0.148	0.127	0.161	0.128	0.147
80.75	0.13	0.114	0.154	0.144	0.15	0.341	0.357	0.391	0.426	0.345	0.375	0.406	0.377	0.081	0.136	0.126	0.123	0.122	0.154	0.147	0.138	0.124		80.75	0.148	0.11	0.143	0.151	0.374	0.448	0.458	0.358	0.398	0.427	0.099	0.143	0.148	0.125	0.16	0.129	0.149
81	0.13	0.114	0.154	0.144	0.15	0.345	0.359	0.394	0.43	0.348	0.377	0.405	0.379	0.081	0.136	0.126	0.124	0.125	0.153	0.147	0.137	0.123		81	0.146	0.11	0.142	0.153	0.372	0.45	0.457	0.356	0.398	0.425	0.099	0.141	0.147	0.124	0.159	0.128	0.148
81.25	0.128	0.119	0.156	0.144	0.15	0.345	0.361	0.398	0.434	0.351	0.375	0.409	0.381	0.081	0.137	0.128	0.125	0.125	0.16	0.146	0.137	0.125		81.25	0.147	0.11	0.147	0.151	0.376	0.451	0.46	0.358	0.4	0.43	0.098	0.14	0.15	0.125	0.158	0.131	0.15
81.5	0.129	0.117	0.156	0.146	0.153	0.346	0.365	0.399	0.436	0.354	0.379	0.41	0.385	0.079	0.137	0.125	0.129	0.123	0.157	0.146	0.136	0.127		81.5	0.145	0.111	0.144	0.152	0.379	0.451	0.459	0.358	0.403	0.429	0.098	0.142	0.15	0.124	0.157	0.129	0.151
81.75	0.128	0.115	0.156	0.145	0.154	0.347	0.366	0.402	0.44	0.354	0.383	0.414	0.388	0.081	0.138	0.126	0.127	0.132	0.157	0.147	0.139	0.126		81.75	0.149	0.109	0.144	0.152	0.379	0.451	0.462	0.361	0.403	0.432	0.098	0.145	0.151	0.119	0.156	0.13	0.152
82	0.127	0.118	0.155	0.147	0.154	0.35	0.369	0.404	0.443	0.355	0.384	0.416	0.389	0.079	0.137	0.129	0.128	0.131	0.157	0.147	0.138	0.127		82	0.151	0.108	0.148	0.152	0.379	0.45	0.464	0.36	0.404	0.433	0.097	0.142	0.149	0.122	0.156	0.129	0.149
82.25	0.125	0.118	0.155	0.146	0.156	0.351	0.37	0.404	0.446	0.358	0.386	0.416	0.392	0.079	0.136	0.127	0.129	0.129	0.154	0.147	0.138	0.127		82.25	0.15	0.11	0.146	0.153	0.382	0.452	0.465	0.359	0.404	0.434	0.097	0.142	0.152	0.12	0.158	0.129	0.153
82.5	0.129	0.116	0.155	0.148	0.157	0.355	0.372	0.411	0.449	0.357	0.387	0.42	0.395	0.079	0.135	0.128	0.131	0.13	0.155	0.149	0.139	0.129		82.5	0.151	0.109	0.145	0.155	0.379	0.456	0.463	0.36	0.405	0.434	0.096	0.143	0.149	0.118	0.157	0.13	0.155
82.75	0.133	0.118	0.155	0.144	0.159	0.352	0.375	0.409	0.45	0.361	0.386	0.422	0.396	0.078	0.136	0.127	0.129	0.13	0.154	0.148	0.136	0.128		82.75	0.148	0.109	0.147	0.154	0.379	0.454	0.466	0.359	0.406	0.437	0.095	0.142	0.151	0.12	0.155	0.13	0.153
83	0.124	0.115	0.155	0.147	0.157	0.354	0.376	0.414	0.453	0.362	0.389	0.424	0.4	0.078	0.136	0.129	0.129	0.13	0.153	0.148	0.137	0.128		83	0.146	0.109	0.147	0.155	0.379	0.456	0.466	0.359	0.409	0.438	0.093	0.145	0.15	0.123	0.154	0.13	0.155
83.25	0.126	0.115	0.156	0.146	0.157	0.355	0.377	0.416	0.455	0.363	0.392	0.427	0.4	0.077	0.135	0.129	0.13	0.129	0.153	0.147	0.138	0.128		83.25	0.149	0.113	0.146	0.154	0.38	0.457	0.467	0.359	0.409	0.436	0.095	0.144	0.154	0.121	0.157	0.133	0.153
83.5	0.126	0.115	0.158	0.148	0.159	0.36	0.381	0.419	0.458	0.365	0.395	0.428	0.403	0.078	0.136	0.129	0.129	0.129	0.153	0.15	0.137	0.128		83.5	0.147	0.112	0.148	0.155	0.378	0.458	0.467	0.36	0.41	0.439	0.094	0.142	0.149	0.121	0.151	0.133	0.152
83.75	0.124	0.116	0.158	0.15	0.16	0.361	0.381	0.421	0.461	0.366	0.395	0.432	0.404	0.077	0.135	0.129	0.131	0.128	0.151	0.149	0.137	0.129		83.75	0.148	0.111	0.146	0.154	0.38	0.459	0.468	0.36	0.409	0.436	0.094	0.144	0.152	0.121	0.156	0.13	0.153
84	0.125	0.113	0.157	0.149	0.158	0.361	0.384	0.422	0.46	0.37	0.399	0.433	0.407	0.076	0.133	0.129	0.129	0.129	0.152	0.148	0.138	0.128		84	0.145	0.111	0.145	0.154	0.381	0.46	0.471	0.363	0.411	0.437	0.096	0.144	0.152	0.119	0.155	0.131	0.153
84.25	0.125	0.115	0.156	0.149	0.157	0.363	0.384	0.424	0.466	0.37	0.399	0.437	0.411	0.076	0.134	0.13	0.129	0.126	0.151	0.148	0.137	0.13		84.25	0.147	0.112	0.145	0.154	0.38	0.459	0.468	0.362	0.409	0.439	0.095	0.145	0.15	0.119	0.153	0.131	0.149
84.5	0.125	0.115	0.156	0.149	0.157	0.365	0.387	0.428	0.468	0.375	0.402	0.439	0.413	0.075	0.134	0.13	0.128	0.126	0.152	0.148	0.135	0.129		84.5	0.149	0.109	0.147	0.153	0.382	0.463	0.47	0.361	0.411	0.441	0.095	0.14	0.148	0.119	0.151	0.133	0.153
84.75	0.125	0.116	0.159	0.148	0.158	0.366	0.393	0.428	0.469	0.373	0.402	0.44	0.416	0.077	0.133	0.131	0.131	0.127	0.151	0.149	0.136	0.128		84.75	0.148	0.109	0.149	0.154	0.383	0.462	0.472	0.362	0.412	0.442	0.095	0.144	0.149	0.118	0.154	0.134	0.15
85	0.124	0.116	0.158	0.147	0.156	0.369	0.395	0.43	0.472	0.377	0.41	0.441	0.419	0.077	0.134	0.129	0.13	0.129	0.153	0.148	0.135	0.129		85	0.149	0.11	0.148	0.154	0.382	0.463	0.472	0.363	0.414	0.441	0.095	0.145	0.148	0.12	0.154	0.133	0.151
85.25	0.124	0.116	0.158	0.147	0.157	0.371	0.394	0.433	0.475	0.379	0.407	0.444	0.42	0.077	0.133	0.129	0.13	0.129	0.155	0.148	0.138	0.13		85.25	0.148	0.112	0.147	0.153	0.382	0.464	0.472	0.364	0.415	0.441	0.096	0.147	0.15	0.121	0.157	0.133	0.152
85.5	0.125	0.118	0.159	0.146	0.157	0.374	0.398	0.435	0.478	0.38	0.41	0.447	0.421	0.075	0.135	0.129	0.131	0.13	0.154	0.147	0.136	0.13		85.5	0.146	0.111	0.148	0.151	0.385	0.464	0.473	0.364	0.414	0.443	0.095	0.144	0.148	0.12	0.155	0.133	0.149
85.75	0.125	0.117	0.158	0.146	0.158	0.376	0.397	0.438	0.482	0.384	0.411	0.449	0.423	0.076	0.134	0.127	0.132	0.13	0.153	0.148	0.136	0.131		85.75	0.15	0.112	0.145	0.151	0.386	0.463	0.473	0.365	0.415	0.441	0.097	0.142	0.146	0.122	0.153	0.133	0.148
86	0.126	0.116	0.157	0.145	0.155	0.377	0.399	0.439	0.484	0.384	0.413	0.449	0.425	0.078	0.134	0.127	0.131	0.129	0.153	0.146	0.134	0.129		86	0.151	0.112	0.143	0.151	0.386	0.466	0.473	0.365	0.412	0.442	0.096	0.142	0.147	0.124	0.158	0.129	0.146
86.25	0.124	0.118	0.153	0.145	0.159	0.378	0.401	0.441	0.486	0.386	0.412	0.453	0.428	0.077	0.131	0.126	0.13	0.129	0.155	0.144	0.135	0.13		86.25	0.146	0.113	0.143	0.149	0.386	0.465	0.474	0.365	0.413	0.443	0.096	0.139	0.148	0.123	0.159	0.128	0.148
86.5	0.127	0.115	0.153	0.144	0.158	0.383	0.404	0.446	0.489	0.39	0.416	0.452	0.43	0.078	0.132	0.125	0.13	0.128	0.153	0.145	0.134	0.131		86.5	0.147	0.112	0.143	0.149	0.387	0.464	0.474	0.365	0.414	0.445	0.098	0.141	0.146	0.123	0.157	0.129	0.147
86.75	0.125	0.118	0.153	0.145	0.153	0.382	0.406	0.444	0.49	0.396	0.418	0.457	0.432	0.075	0.132	0.128	0.13	0.127	0.153	0.143	0.134	0.129		86.75	0.15	0.115	0.143	0.148	0.383	0.465	0.475	0.365	0.415	0.443	0.097	0.139	0.146	0.123	0.16	0.131	0.148
87	0.126	0.115	0.153	0.144	0.156	0.384	0.407	0.448	0.492	0.399	0.419	0.458	0.433	0.076	0.133	0.127	0.132	0.126	0.153	0.145	0.135	0.13		87	0.149	0.113	0.142	0.148	0.386	0.465	0.476	0.366	0.417	0.443	0.096	0.142	0.147	0.122	0.157	0.13	0.146
87.25	0.124	0.117	0.153	0.143	0.158	0.385	0.409	0.448	0.497	0.4	0.423	0.458	0.437	0.077	0.132	0.124	0.131	0.126	0.155	0.144	0.132	0.13		87.25	0.149	0.11	0.142	0.15	0.387	0.466	0.477	0.366	0.418	0.443	0.096	0.145	0.145	0.121	0.158	0.132	0.144
87.5	0.128	0.117	0.156	0.144	0.157	0.388	0.413	0.453	0.499	0.401	0.426	0.462	0.436	0.076	0.132	0.126	0.132	0.126	0.155	0.145	0.135	0.131		87.5	0.148	0.112	0.144	0.149	0.388	0.47	0.476	0.369	0.417	0.444	0.097	0.14	0.147	0.123	0.159	0.131	0.146
87.75	0.125	0.118	0.156	0.142	0.16	0.39	0.416	0.453	0.503	0.403	0.426	0.464	0.439	0.077	0.135	0.123	0.132	0.126	0.154	0.145	0.133	0.132		87.75	0.148	0.111	0.143	0.148	0.388	0.467	0.477	0.366	0.417	0.444	0.098	0.142	0.145	0.125	0.16	0.131	0.144
88	0.127	0.116	0.155	0.145	0.157	0.393	0.415	0.456	0.503	0.405	0.43	0.466	0.441	0.077	0.135	0.125	0.129	0.125	0.155	0.149	0.133	0.13		88	0.148	0.112	0.145	0.146	0.386	0.47	0.476	0.368	0.42	0.444	0.097	0.142	0.145	0.126	0.16	0.132	0.141
88.25	0.128	0.119	0.155	0.141	0.156	0.394	0.418	0.456	0.506	0.408	0.432	0.467	0.443	0.078	0.137	0.125	0.131	0.125	0.158	0.147	0.132	0.131		88.25	0.151	0.112	0.145	0.143	0.39	0.468	0.478	0.366	0.418	0.446	0.097	0.143	0.143	0.127	0.16	0.132	0.142
88.5	0.125	0.116	0.157	0.143	0.156	0.397	0.42	0.459	0.508	0.408	0.433	0.469	0.445	0.076	0.134	0.126	0.132	0.125	0.156	0.148	0.135	0.132		88.5	0.149	0.113	0.145	0.146	0.39	0.473	0.48	0.369	0.421	0.445	0.098	0.143	0.144	0.124	0.16	0.131	0.145
88.75	0.127	0.119	0.157	0.142	0.158	0.398	0.424	0.463	0.51	0.412	0.435	0.472	0.448	0.078	0.135	0.127	0.134	0.126	0.156	0.147	0.134	0.13		88.75	0.151	0.115	0.145	0.149	0.389	0.469	0.48	0.367	0.421	0.447	0.097	0.143	0.145	0.125	0.162	0.135	0.145
89	0.13	0.117	0.156	0.143	0.156	0.406	0.425	0.465	0.513	0.413	0.439	0.474	0.45	0.078	0.136	0.126	0.132	0.126	0.158	0.145	0.136	0.131		89	0.151	0.113	0.145	0.15	0.392	0.471	0.482	0.369	0.424	0.449	0.098	0.143	0.147	0.126	0.161	0.144	0.148
89.25	0.128	0.118	0.161	0.145	0.155	0.405	0.428	0.467	0.513	0.413	0.441	0.477	0.453	0.078	0.137	0.127	0.131	0.124	0.157	0.147	0.135	0.131		89.25	0.149	0.115	0.148	0.15	0.388	0.471	0.482	0.369	0.427	0.45	0.098	0.145	0.146	0.123	0.16	0.145	0.149
89.5	0.126	0.119	0.16	0.146	0.158	0.407	0.431	0.47	0.52	0.417	0.442	0.481	0.456	0.079	0.138	0.129	0.135	0.125	0.156	0.148	0.137	0.132		89.5	0.149	0.114	0.149	0.153	0.39	0.475	0.484	0.37	0.427	0.451	0.1	0.144	0.149	0.127	0.16	0.142	0.153
89.75	0.129	0.119	0.16	0.148	0.158	0.409	0.432	0.476	0.524	0.419	0.446	0.485	0.459	0.078	0.138	0.13	0.134	0.125	0.159	0.148	0.138	0.134		89.75	0.152	0.114	0.146	0.153	0.391	0.473	0.487	0.371	0.426	0.454	0.099	0.143	0.15	0.127	0.165	0.141	0.15
90	0.131	0.119	0.161	0.15	0.16	0.414	0.434	0.479	0.528	0.421	0.449	0.487	0.462	0.078	0.14	0.132	0.134	0.125	0.157	0.148	0.139	0.134		90	0.151	0.116	0.147	0.154	0.392	0.473	0.487	0.372	0.429	0.457	0.1	0.144	0.151	0.129	0.165	0.142	0.153
90.25	0.129	0.117	0.161	0.15	0.16	0.415	0.436	0.48	0.53	0.423	0.449	0.489	0.462	0.081	0.138	0.131	0.136	0.126	0.158	0.148	0.142	0.136		90.25	0.154	0.115	0.147	0.154	0.391	0.475	0.489	0.368	0.43	0.457	0.101	0.145	0.15	0.129	0.167	0.145	0.154
90.5	0.131	0.119	0.159	0.152	0.159	0.418	0.44	0.484	0.535	0.426	0.454	0.492	0.465	0.08	0.14	0.134	0.134	0.125	0.16	0.146	0.141	0.136		90.5	0.151	0.116	0.146	0.155	0.393	0.475	0.492	0.372	0.428	0.458	0.1	0.144	0.153	0.129	0.163	0.144	0.157
90.75	0.127	0.119	0.158	0.15	0.159	0.418	0.44	0.486	0.535	0.428	0.452	0.494	0.468	0.079	0.139	0.132	0.135	0.125	0.16	0.149	0.141	0.136		90.75	0.153	0.114	0.147	0.154	0.392	0.477	0.492	0.372	0.428	0.459	0.099	0.143	0.15	0.128	0.165	0.141	0.156
91	0.132	0.121	0.161	0.15	0.16	0.422	0.444	0.489	0.54	0.43	0.455	0.495	0.471	0.079	0.137	0.131	0.136	0.125	0.16	0.148	0.142	0.135		91	0.149	0.115	0.149	0.157	0.393	0.478	0.494	0.37	0.43	0.457	0.1	0.145	0.151	0.129	0.164	0.141	0.156
91.25	0.128	0.119	0.158	0.151	0.157	0.424	0.445	0.491	0.541	0.43	0.457	0.498	0.472	0.079	0.138	0.132	0.132	0.127	0.162	0.145	0.142	0.136		91.25	0.149	0.114	0.147	0.154	0.393	0.474	0.492	0.37	0.428	0.46	0.099	0.142	0.153	0.127	0.165	0.139	0.155
91.5	0.127	0.118	0.158	0.154	0.157	0.424	0.446	0.495	0.543	0.433	0.46	0.504	0.474	0.078	0.138	0.134	0.134	0.125	0.16	0.145	0.146	0.136		91.5	0.145	0.111	0.145	0.155	0.392	0.478	0.495	0.367	0.428	0.461	0.095	0.142	0.151	0.122	0.156	0.142	0.158
91.75	0.127	0.116	0.159	0.153	0.158	0.422	0.447	0.498	0.542	0.434	0.461	0.504	0.474	0.077	0.137	0.134	0.132	0.123	0.158	0.146	0.145	0.136		91.75	0.143	0.111	0.147	0.158	0.391	0.476	0.494	0.366	0.431	0.462	0.094	0.143	0.154	0.12	0.157	0.139	0.159
92	0.123	0.113	0.16	0.154	0.154	0.424	0.45	0.5	0.545	0.433	0.464	0.506	0.478	0.074	0.138	0.136	0.132	0.122	0.156	0.147	0.145	0.133		92	0.142	0.11	0.144	0.155	0.388	0.477	0.5	0.365	0.428	0.463	0.092	0.142	0.153	0.118	0.154	0.138	0.16
92.25	0.122	0.111	0.156	0.153	0.151	0.424	0.452	0.502	0.547	0.434	0.465	0.508	0.477	0.074	0.139	0.136	0.129	0.119	0.154	0.145	0.146	0.133		92.25	0.138	0.109	0.141	0.158	0.386	0.477	0.497	0.365	0.429	0.462	0.092	0.141	0.153	0.116	0.152	0.137	0.161
92.5	0.121	0.114	0.154	0.156	0.153	0.432	0.451	0.505	0.551	0.436	0.465	0.512	0.48	0.073	0.135	0.135	0.132	0.119	0.153	0.143	0.146	0.134		92.5	0.148	0.11	0.143	0.158	0.392	0.479	0.501	0.365	0.427	0.463	0.091	0.14	0.15	0.115	0.151	0.137	0.16
92.75	0.12	0.112	0.153	0.155	0.153	0.432	0.453	0.507	0.551	0.439	0.467	0.513	0.483	0.073	0.134	0.135	0.13	0.12	0.155	0.141	0.145	0.133		92.75	0.149	0.111	0.142	0.161	0.387	0.476	0.499	0.365	0.428	0.469	0.092	0.141	0.154	0.115	0.15	0.137	0.163
93	0.119	0.114	0.156	0.152	0.156	0.431	0.456	0.509	0.557	0.437	0.472	0.515	0.485	0.074	0.136	0.136	0.13	0.121	0.154	0.144	0.146	0.135		93	0.147	0.107	0.144	0.159	0.383	0.479	0.5	0.365	0.431	0.466	0.095	0.141	0.153	0.116	0.152	0.136	0.162
93.25	0.121	0.114	0.157	0.155	0.155	0.431	0.46	0.512	0.558	0.443	0.474	0.516	0.49	0.074	0.136	0.136	0.131	0.12	0.157	0.142	0.145	0.134		93.25	0.151	0.111	0.146	0.159	0.387	0.48	0.5	0.364	0.43	0.465	0.093	0.142	0.151	0.118	0.155	0.141	0.161
93.5	0.121	0.116	0.156	0.154	0.154	0.437	0.462	0.514	0.563	0.444	0.477	0.521	0.491	0.074	0.137	0.137	0.131	0.123	0.157	0.144	0.146	0.135		93.5	0.149	0.11	0.144	0.16	0.387	0.482	0.501	0.366	0.432	0.466	0.093	0.141	0.153	0.117	0.157	0.137	0.159
93.75	0.122	0.114	0.156	0.151	0.156	0.439	0.463	0.514	0.565	0.445	0.477	0.522	0.49	0.075	0.136	0.134	0.134	0.123	0.159	0.146	0.144	0.135		93.75	0.152	0.112	0.144	0.156	0.392	0.48	0.5	0.367	0.433	0.465	0.094	0.143	0.149	0.121	0.158	0.139	0.155
94	0.124	0.116	0.158	0.149	0.158	0.443	0.468	0.516	0.571	0.45	0.481	0.523	0.498	0.076	0.138	0.132	0.135	0.123	0.157	0.147	0.143	0.139		94	0.153	0.112	0.145	0.156	0.394	0.48	0.501	0.367	0.436	0.462	0.096	0.142	0.149	0.123	0.159	0.14	0.153
94.25	0.127	0.117	0.157	0.146	0.16	0.44	0.469	0.516	0.573	0.453	0.485	0.522	0.499	0.077	0.138	0.132	0.136	0.125	0.16	0.148	0.143	0.138		94.25	0.153	0.115	0.146	0.154	0.394	0.482	0.498	0.369	0.437	0.462	0.096	0.145	0.148	0.122	0.158	0.139	0.152
94.5	0.127	0.116	0.156	0.145	0.16	0.446	0.47	0.517	0.575	0.454	0.486	0.525	0.501	0.078	0.138	0.131	0.136	0.125	0.163	0.144	0.141	0.138		94.5	0.154	0.115	0.148	0.153	0.396	0.484	0.499	0.37	0.439	0.461	0.097	0.142	0.147	0.125	0.161	0.142	0.149
94.75	0.129	0.117	0.16	0.145	0.159	0.449	0.473	0.52	0.577	0.457	0.489	0.526	0.505	0.078	0.139	0.129	0.137	0.127	0.159	0.146	0.14	0.138		94.75	0.156	0.116	0.146	0.152	0.396	0.485	0.5	0.364	0.439	0.462	0.096	0.143	0.147	0.125	0.162	0.14	0.146
95	0.127	0.121	0.156	0.144	0.161	0.454	0.474	0.518	0.581	0.461	0.491	0.528	0.507	0.078	0.138	0.128	0.137	0.129	0.162	0.146	0.139	0.138		95	0.159	0.115	0.147	0.151	0.398	0.487	0.5	0.365	0.44	0.462	0.097	0.143	0.148	0.127	0.163	0.14	0.147
95.25	0.13	0.117	0.158	0.144	0.16	0.454	0.477	0.523	0.585	0.461	0.493	0.531	0.511	0.078	0.137	0.13	0.136	0.129	0.161	0.147	0.139	0.14		95.25	0.155	0.115	0.15	0.149	0.398	0.487	0.499	0.365	0.44	0.462	0.098	0.145	0.145	0.128	0.162	0.143	0.146
95.5	0.131	0.117	0.158	0.143	0.162	0.457	0.481	0.525	0.587	0.461	0.496	0.533	0.512	0.079	0.14	0.129	0.138	0.129	0.162	0.147	0.137	0.141		95.5	0.155	0.112	0.15	0.151	0.396	0.487	0.501	0.368	0.441	0.464	0.097	0.146	0.143	0.127	0.165	0.143	0.146
95.75	0.124	0.115	0.161	0.144	0.162	0.459	0.483	0.529	0.589	0.465	0.5	0.536	0.516	0.079	0.139	0.13	0.138	0.129	0.162	0.149	0.14	0.139		95.75	0.156	0.114	0.148	0.152	0.395	0.487	0.511	0.366	0.44	0.464	0.099	0.143	0.144	0.128	0.164	0.141	0.151
96	0.128	0.117	0.158	0.143	0.16	0.461	0.483	0.531	0.592	0.469	0.499	0.537	0.516	0.08	0.139	0.13	0.138	0.129	0.162	0.145	0.141	0.142		96	0.158	0.116	0.146	0.15	0.398	0.487	0.511	0.366	0.44	0.468	0.098	0.141	0.147	0.126	0.164	0.142	0.149
96.25	0.13	0.119	0.158	0.146	0.162	0.463	0.486	0.533	0.595	0.469	0.503	0.542	0.521	0.08	0.138	0.13	0.136	0.13	0.164	0.147	0.142	0.141		96.25	0.158	0.115	0.147	0.152	0.398	0.488	0.511	0.366	0.441	0.466	0.098	0.143	0.146	0.128	0.167	0.14	0.153
96.5	0.131	0.119	0.16	0.147	0.159	0.463	0.49	0.536	0.597	0.471	0.505	0.545	0.522	0.079	0.138	0.13	0.136	0.131	0.165	0.145	0.144	0.14		96.5	0.157	0.114	0.145	0.156	0.396	0.49	0.512	0.365	0.441	0.467	0.097	0.144	0.148	0.127	0.165	0.142	0.151
96.75	0.127	0.118	0.16	0.146	0.158	0.463	0.492	0.539	0.596	0.473	0.507	0.547	0.52	0.078	0.139	0.13	0.134	0.129	0.163	0.145	0.14	0.14		96.75	0.156	0.115	0.149	0.156	0.402	0.494	0.515	0.366	0.442	0.47	0.097	0.141	0.151	0.13	0.166	0.144	0.154
97	0.13	0.117	0.158	0.147	0.158	0.468	0.493	0.542	0.601	0.474	0.508	0.549	0.525	0.078	0.139	0.133	0.133	0.13	0.163	0.146	0.143	0.139		97	0.155	0.113	0.147	0.154	0.4	0.496	0.515	0.365	0.445	0.468	0.096	0.14	0.146	0.128	0.165	0.141	0.153
97.25	0.128	0.117	0.158	0.149	0.156	0.471	0.495	0.547	0.601	0.476	0.511	0.553	0.524	0.078	0.138	0.134	0.135	0.129	0.163	0.146	0.143	0.139		97.25	0.154	0.117	0.148	0.155	0.401	0.498	0.516	0.365	0.444	0.467	0.096	0.143	0.148	0.126	0.165	0.142	0.154
97.5	0.135	0.118	0.159	0.147	0.155	0.473	0.496	0.549	0.603	0.479	0.515	0.555	0.526	0.08	0.141	0.132	0.132	0.132	0.163	0.146	0.144	0.135		97.5	0.153	0.112	0.148	0.154	0.399	0.498	0.518	0.361	0.443	0.47	0.095	0.142	0.147	0.124	0.159	0.142	0.155
97.75	0.129	0.118	0.157	0.148	0.152	0.474	0.499	0.551	0.602	0.478	0.516	0.557	0.528	0.076	0.14	0.134	0.131	0.129	0.161	0.146	0.143	0.136		97.75	0.151	0.112	0.148	0.158	0.397	0.496	0.518	0.361	0.445	0.472	0.095	0.144	0.151	0.121	0.157	0.14	0.157
98	0.122	0.115	0.157	0.149	0.152	0.471	0.503	0.554	0.607	0.478	0.519	0.561	0.531	0.074	0.138	0.134	0.134	0.127	0.16	0.146	0.145	0.135		98	0.147	0.112	0.147	0.156	0.396	0.498	0.517	0.359	0.444	0.47	0.092	0.143	0.149	0.117	0.155	0.142	0.153
98.25	0.121	0.113	0.157	0.147	0.153	0.475	0.505	0.555	0.609	0.48	0.52	0.564	0.532	0.074	0.138	0.133	0.135	0.126	0.158	0.146	0.143	0.138		98.25	0.146	0.11	0.144	0.159	0.396	0.499	0.52	0.357	0.446	0.471	0.09	0.142	0.149	0.116	0.155	0.143	0.154
98.5	0.124	0.114	0.158	0.146	0.155	0.475	0.506	0.558	0.614	0.482	0.524	0.566	0.537	0.075	0.138	0.133	0.134	0.127	0.16	0.147	0.143	0.138		98.5	0.144	0.109	0.145	0.156	0.397	0.501	0.52	0.358	0.444	0.473	0.09	0.141	0.147	0.112	0.15	0.142	0.154
98.75	0.121	0.111	0.158	0.145	0.155	0.478	0.511	0.559	0.616	0.483	0.525	0.565	0.54	0.072	0.138	0.134	0.132	0.126	0.155	0.147	0.145	0.139		98.75	0.146	0.111	0.147	0.157	0.397	0.502	0.519	0.358	0.446	0.473	0.091	0.142	0.148	0.115	0.152	0.141	0.152
99	0.124	0.116	0.157	0.148	0.156	0.479	0.511	0.562	0.62	0.485	0.528	0.571	0.543	0.074	0.137	0.135	0.135	0.129	0.159	0.145	0.146	0.142		99	0.148	0.112	0.146	0.158	0.397	0.501	0.523	0.355	0.444	0.474	0.091	0.144	0.148	0.119	0.156	0.142	0.154
99.25	0.122	0.116	0.156	0.149	0.158	0.483	0.512	0.565	0.624	0.489	0.529	0.571	0.545	0.076	0.138	0.134	0.137	0.13	0.16	0.149	0.144	0.141		99.25	0.15	0.114	0.148	0.157	0.398	0.501	0.523	0.359	0.447	0.475	0.093	0.142	0.148	0.118	0.159	0.142	0.153
99.5	0.12	0.114	0.156	0.148	0.158	0.486	0.516	0.57	0.629	0.49	0.531	0.575	0.549	0.075	0.137	0.133	0.135	0.132	0.159	0.147	0.144	0.142		99.5	0.148	0.113	0.146	0.158	0.4	0.5	0.524	0.356	0.447	0.476	0.093	0.141	0.15	0.121	0.159	0.144	0.157
99.75	0.126	0.119	0.156	0.148	0.159	0.49	0.518	0.57	0.631	0.493	0.533	0.578	0.549	0.077	0.138	0.134	0.137	0.133	0.16	0.147	0.144	0.144		99.75	0.152	0.112	0.148	0.158	0.399	0.503	0.524	0.357	0.447	0.474	0.094	0.144	0.149	0.122	0.16	0.14	0.154
100	0.126	0.116	0.157	0.151	0.159	0.492	0.519	0.574	0.635	0.494	0.536	0.579	0.554	0.077	0.138	0.135	0.139	0.134	0.162	0.146	0.143	0.143		100	0.149	0.114	0.146	0.158	0.403	0.499	0.525	0.359	0.448	0.475	0.096	0.142	0.15	0.12	0.161	0.141	0.155
100.25	0.125	0.115	0.157	0.149	0.161	0.495	0.521	0.576	0.638	0.497	0.538	0.583	0.557	0.077	0.139	0.136	0.139	0.134	0.163	0.146	0.145	0.142		100.25	0.152	0.115	0.144	0.159	0.403	0.504	0.525	0.361	0.446	0.476	0.094	0.142	0.153	0.122	0.16	0.141	0.156
100.5	0.127	0.118	0.156	0.152	0.159	0.498	0.526	0.58	0.64	0.499	0.54	0.584	0.559	0.077	0.138	0.136	0.138	0.136	0.163	0.146	0.146	0.143		100.5	0.153	0.115	0.147	0.161	0.4	0.502	0.528	0.359	0.448	0.477	0.096	0.144	0.151	0.125	0.164	0.14	0.157
100.75	0.126	0.118	0.157	0.149	0.161	0.5	0.527	0.58	0.644	0.502	0.542	0.588	0.562	0.078	0.138	0.135	0.138	0.137	0.163	0.145	0.146	0.145		100.75	0.153	0.115	0.147	0.157	0.4	0.503	0.529	0.359	0.449	0.479	0.096	0.144	0.151	0.123	0.164	0.139	0.156
101	0.129	0.116	0.154	0.151	0.161	0.503	0.529	0.585	0.648	0.503	0.544	0.591	0.566	0.079	0.14	0.136	0.139	0.137	0.164	0.144	0.145	0.143		101	0.153	0.115	0.145	0.158	0.401	0.506	0.529	0.36	0.447	0.478	0.097	0.142	0.149	0.127	0.165	0.138	0.155
101.25	0.126	0.117	0.156	0.149	0.163	0.504	0.533	0.586	0.651	0.505	0.547	0.593	0.568	0.078	0.14	0.135	0.141	0.137	0.164	0.147	0.145	0.146		101.25	0.153	0.113	0.144	0.156	0.403	0.505	0.532	0.36	0.447	0.477	0.097	0.141	0.151	0.129	0.164	0.14	0.156
101.5	0.126	0.119	0.157	0.15	0.163	0.509	0.535	0.588	0.655	0.508	0.55	0.595	0.571	0.08	0.139	0.133	0.139	0.138	0.165	0.146	0.147	0.145		101.5	0.153	0.115	0.146	0.158	0.409	0.507	0.53	0.356	0.449	0.48	0.098	0.143	0.151	0.126	0.167	0.139	0.158
101.75	0.129	0.118	0.157	0.148	0.161	0.508	0.536	0.589	0.655	0.511	0.551	0.596	0.571	0.08	0.138	0.134	0.138	0.14	0.166	0.147	0.146	0.146		101.75	0.152	0.114	0.145	0.157	0.404	0.507	0.53	0.354	0.447	0.479	0.097	0.14	0.152	0.126	0.166	0.143	0.156
102	0.127	0.118	0.155	0.149	0.163	0.512	0.539	0.593	0.661	0.512	0.552	0.6	0.576	0.078	0.139	0.136	0.139	0.138	0.163	0.146	0.146	0.146		102	0.153	0.116	0.144	0.155	0.404	0.508	0.532	0.354	0.45	0.477	0.096	0.143	0.147	0.125	0.166	0.141	0.156
102.25	0.127	0.12	0.156	0.147	0.159	0.515	0.541	0.596	0.659	0.512	0.556	0.602	0.575	0.078	0.14	0.136	0.139	0.14	0.165	0.147	0.145	0.143		102.25	0.155	0.115	0.147	0.157	0.408	0.508	0.531	0.358	0.451	0.48	0.096	0.142	0.15	0.127	0.164	0.14	0.155
102.5	0.128	0.12	0.155	0.147	0.157	0.518	0.545	0.599	0.664	0.514	0.558	0.604	0.576	0.079	0.139	0.135	0.138	0.139	0.166	0.147	0.144	0.141		102.5	0.156	0.115	0.145	0.157	0.404	0.507	0.534	0.356	0.451	0.48	0.097	0.141	0.149	0.127	0.164	0.139	0.154
102.75	0.126	0.118	0.155	0.149	0.155	0.517	0.547	0.601	0.663	0.519	0.559	0.607	0.579	0.078	0.139	0.136	0.136	0.139	0.164	0.147	0.146	0.142		102.75	0.15	0.115	0.145	0.156	0.405	0.508	0.536	0.355	0.45	0.479	0.098	0.142	0.147	0.126	0.165	0.139	0.152
103	0.13	0.119	0.156	0.146	0.157	0.522	0.549	0.602	0.668	0.52	0.562	0.61	0.581	0.079	0.138	0.136	0.135	0.139	0.164	0.147	0.146	0.143		103	0.151	0.116	0.143	0.158	0.406	0.509	0.535	0.355	0.452	0.479	0.097	0.142	0.149	0.126	0.166	0.14	0.154
103.25	0.129	0.122	0.155	0.147	0.155	0.522	0.552	0.605	0.669	0.521	0.562	0.612	0.583	0.079	0.139	0.134	0.133	0.141	0.167	0.146	0.145	0.138		103.25	0.153	0.114	0.144	0.156	0.405	0.508	0.536	0.354	0.452	0.48	0.096	0.142	0.145	0.125	0.163	0.14	0.152
103.5	0.127	0.117	0.154	0.147	0.156	0.525	0.552	0.608	0.67	0.523	0.565	0.613	0.583	0.079	0.139	0.133	0.136	0.14	0.165	0.147	0.141	0.139		103.5	0.149	0.114	0.143	0.156	0.403	0.508	0.536	0.352	0.45	0.48	0.092	0.141	0.148	0.118	0.158	0.141	0.152
103.75	0.122	0.115	0.158	0.147	0.151	0.528	0.556	0.61	0.671	0.525	0.568	0.618	0.587	0.077	0.138	0.136	0.132	0.139	0.163	0.148	0.145	0.139		103.75	0.147	0.114	0.144	0.155	0.404	0.51	0.536	0.349	0.454	0.477	0.093	0.141	0.148	0.117	0.156	0.138	0.153
104	0.123	0.117	0.156	0.147	0.152	0.528	0.557	0.614	0.676	0.525	0.57	0.62	0.59	0.078	0.138	0.132	0.134	0.139	0.163	0.146	0.143	0.139		104	0.144	0.113	0.144	0.155	0.4	0.507	0.538	0.347	0.45	0.479	0.09	0.142	0.148	0.113	0.151	0.139	0.153
104.25	0.121	0.115	0.157	0.146	0.153	0.528	0.561	0.612	0.682	0.525	0.572	0.621	0.592	0.075	0.138	0.135	0.134	0.136	0.161	0.147	0.144	0.14		104.25	0.143	0.11	0.147	0.155	0.401	0.515	0.54	0.348	0.452	0.479	0.09	0.142	0.149	0.115	0.153	0.139	0.151
104.5	0.12	0.113	0.153	0.145	0.153	0.531	0.562	0.618	0.684	0.526	0.573	0.624	0.597	0.074	0.138	0.135	0.135	0.136	0.159	0.147	0.147	0.142		104.5	0.145	0.113	0.145	0.154	0.404	0.512	0.541	0.347	0.452	0.481	0.091	0.141	0.147	0.116	0.153	0.141	0.153
104.75	0.124	0.117	0.156	0.146	0.154	0.536	0.564	0.619	0.687	0.532	0.577	0.625	0.598	0.075	0.138	0.133	0.135	0.137	0.163	0.147	0.143	0.142		104.75	0.146	0.115	0.145	0.155	0.404	0.51	0.542	0.354	0.454	0.48	0.094	0.142	0.149	0.117	0.157	0.141	0.153
105	0.121	0.113	0.155	0.146	0.157	0.536	0.565	0.623	0.693	0.533	0.577	0.629	0.6	0.076	0.138	0.135	0.136	0.137	0.162	0.148	0.147	0.143		105	0.149	0.114	0.146	0.156	0.404	0.512	0.54	0.348	0.452	0.481	0.093	0.141	0.147	0.12	0.159	0.139	0.153
105.25	0.123	0.115	0.156	0.146	0.158	0.54	0.571	0.626	0.696	0.535	0.581	0.632	0.605	0.075	0.141	0.135	0.137	0.138	0.163	0.148	0.144	0.141		105.25	0.15	0.114	0.146	0.157	0.407	0.515	0.542	0.35	0.455	0.483	0.094	0.142	0.149	0.121	0.161	0.139	0.153
105.5	0.122	0.113	0.154	0.145	0.158	0.541	0.57	0.628	0.699	0.537	0.584	0.634	0.606	0.076	0.139	0.134	0.136	0.14	0.164	0.148	0.144	0.143		105.5	0.15	0.115	0.145	0.155	0.403	0.513	0.542	0.348	0.453	0.481	0.094	0.142	0.148	0.12	0.16	0.14	0.154
105.75	0.123	0.117	0.153	0.145	0.159	0.545	0.573	0.629	0.704	0.541	0.587	0.637	0.609	0.077	0.139	0.133	0.137	0.14	0.164	0.148	0.145	0.144		105.75	0.153	0.115	0.148	0.156	0.404	0.514	0.542	0.348	0.456	0.483	0.093	0.144	0.148	0.121	0.161	0.141	0.151
106	0.129	0.118	0.157	0.146	0.16	0.549	0.577	0.631	0.707	0.543	0.591	0.639	0.614	0.077	0.14	0.134	0.139	0.14	0.166	0.149	0.143	0.147		106	0.151	0.114	0.146	0.154	0.406	0.517	0.546	0.351	0.453	0.485	0.095	0.143	0.147	0.122	0.168	0.141	0.152
106.25	0.129	0.116	0.155	0.145	0.161	0.553	0.578	0.635	0.71	0.546	0.591	0.64	0.615	0.078	0.14	0.135	0.139	0.142	0.167	0.146	0.146	0.146		106.25	0.152	0.115	0.146	0.155	0.404	0.525	0.544	0.349	0.455	0.484	0.096	0.142	0.149	0.123	0.166	0.143	0.151
106.5	0.126	0.12	0.157	0.146	0.158	0.553	0.581	0.637	0.713	0.549	0.596	0.645	0.618	0.076	0.141	0.135	0.139	0.14	0.166	0.149	0.144	0.144		106.5	0.155	0.115	0.146	0.156	0.407	0.524	0.547	0.349	0.456	0.483	0.097	0.143	0.147	0.125	0.17	0.141	0.152
106.75	0.127	0.118	0.157	0.147	0.158	0.555	0.584	0.64	0.716	0.55	0.598	0.648	0.621	0.078	0.139	0.135	0.14	0.141	0.165	0.149	0.144	0.144		106.75	0.153	0.117	0.147	0.157	0.406	0.525	0.547	0.348	0.456	0.486	0.097	0.14	0.147	0.123	0.169	0.14	0.155
107	0.126	0.119	0.156	0.146	0.159	0.56	0.587	0.643	0.719	0.554	0.601	0.651	0.622	0.079	0.14	0.136	0.14	0.143	0.167	0.149	0.146	0.146		107	0.153	0.118	0.149	0.16	0.404	0.528	0.55	0.349	0.457	0.486	0.097	0.147	0.148	0.125	0.168	0.141	0.154
107.25	0.128	0.117	0.156	0.149	0.158	0.562	0.589	0.646	0.719	0.552	0.603	0.653	0.627	0.078	0.14	0.135	0.137	0.143	0.165	0.149	0.146	0.143		107.25	0.153	0.116	0.149	0.156	0.405	0.527	0.552	0.35	0.457	0.487	0.095	0.143	0.149	0.124	0.169	0.143	0.154
107.5	0.13	0.117	0.157	0.147	0.154	0.564	0.592	0.648	0.723	0.557	0.604	0.655	0.627	0.08	0.143	0.136	0.134	0.143	0.167	0.151	0.146	0.142		107.5	0.154	0.119	0.145	0.156	0.408	0.527	0.552	0.349	0.456	0.485	0.097	0.143	0.148	0.126	0.169	0.141	0.154
107.75	0.126	0.119	0.158	0.146	0.156	0.566	0.595	0.65	0.724	0.559	0.608	0.658	0.63	0.08	0.144	0.136	0.136	0.142	0.168	0.15	0.147	0.141		107.75	0.151	0.117	0.145	0.156	0.409	0.527	0.549	0.35	0.455	0.487	0.097	0.143	0.148	0.126	0.17	0.141	0.153
108	0.128	0.118	0.157	0.149	0.153	0.568	0.596	0.655	0.726	0.562	0.611	0.661	0.63	0.078	0.141	0.136	0.135	0.144	0.167	0.149	0.146	0.142		108	0.152	0.119	0.144	0.158	0.408	0.528	0.553	0.347	0.457	0.484	0.096	0.144	0.15	0.126	0.167	0.14	0.154
108.25	0.128	0.125	0.158	0.147	0.152	0.572	0.598	0.655	0.729	0.565	0.612	0.664	0.633	0.08	0.141	0.136	0.134	0.144	0.168	0.149	0.145	0.14		108.25	0.154	0.114	0.147	0.158	0.41	0.528	0.554	0.347	0.458	0.486	0.097	0.143	0.15	0.123	0.168	0.143	0.154
108.5	0.127	0.117	0.157	0.149	0.152	0.574	0.6	0.661	0.732	0.565	0.614	0.668	0.635	0.079	0.14	0.137	0.133	0.143	0.168	0.147	0.148	0.142		108.5	0.154	0.116	0.147	0.16	0.408	0.528	0.553	0.349	0.458	0.488	0.094	0.141	0.149	0.125	0.167	0.14	0.155
108.75	0.124	0.118	0.156	0.148	0.15	0.577	0.601	0.663	0.734	0.566	0.617	0.667	0.638	0.08	0.141	0.136	0.133	0.144	0.169	0.151	0.145	0.141		108.75	0.148	0.115	0.146	0.159	0.404	0.527	0.553	0.346	0.457	0.487	0.093	0.141	0.148	0.119	0.164	0.142	0.157
109	0.124	0.115	0.156	0.148	0.153	0.575	0.605	0.665	0.739	0.568	0.618	0.671	0.644	0.075	0.139	0.139	0.136	0.141	0.164	0.149	0.147	0.144		109	0.145	0.113	0.145	0.157	0.403	0.527	0.554	0.342	0.457	0.486	0.093	0.143	0.149	0.118	0.159	0.138	0.154
109.25	0.121	0.117	0.158	0.149	0.152	0.578	0.607	0.669	0.742	0.57	0.622	0.673	0.643	0.075	0.141	0.136	0.136	0.14	0.164	0.149	0.146	0.141		109.25	0.144	0.113	0.146	0.157	0.402	0.529	0.554	0.342	0.455	0.487	0.09	0.14	0.147	0.116	0.158	0.14	0.155
109.5	0.119	0.115	0.154	0.146	0.154	0.578	0.609	0.675	0.746	0.571	0.624	0.673	0.648	0.074	0.14	0.137	0.136	0.14	0.165	0.149	0.147	0.142		109.5	0.143	0.113	0.145	0.159	0.402	0.528	0.556	0.34	0.457	0.488	0.089	0.141	0.148	0.116	0.157	0.139	0.153
109.75	0.121	0.112	0.152	0.148	0.151	0.582	0.612	0.677	0.748	0.573	0.625	0.68	0.649	0.074	0.138	0.137	0.135	0.141	0.164	0.149	0.147	0.142		109.75	0.145	0.113	0.145	0.158	0.403	0.525	0.556	0.343	0.457	0.484	0.091	0.14	0.149	0.117	0.163	0.139	0.155
110	0.12	0.115	0.154	0.149	0.152	0.586	0.615	0.68	0.754	0.574	0.629	0.682	0.651	0.075	0.142	0.137	0.135	0.141	0.164	0.15	0.148	0.144		110	0.149	0.116	0.144	0.158	0.404	0.53	0.556	0.342	0.459	0.486	0.094	0.142	0.149	0.12	0.165	0.139	0.154
110.25	0.127	0.116	0.153	0.148	0.156	0.588	0.615	0.682	0.758	0.578	0.632	0.683	0.655	0.077	0.141	0.138	0.137	0.143	0.166	0.15	0.147	0.144		110.25	0.149	0.115	0.147	0.16	0.404	0.528	0.558	0.343	0.457	0.487	0.094	0.142	0.148	0.121	0.164	0.139	0.155
110.5	0.124	0.119	0.154	0.148	0.155	0.591	0.618	0.687	0.763	0.581	0.633	0.687	0.657	0.077	0.14	0.136	0.136	0.142	0.166	0.149	0.147	0.145		110.5	0.146	0.117	0.146	0.159	0.404	0.529	0.558	0.336	0.459	0.486	0.093	0.145	0.148	0.12	0.163	0.139	0.154
110.75	0.123	0.116	0.157	0.149	0.156	0.592	0.623	0.689	0.764	0.582	0.636	0.689	0.661	0.076	0.14	0.138	0.138	0.143	0.168	0.15	0.146	0.145		110.75	0.149	0.117	0.147	0.158	0.404	0.529	0.559	0.337	0.459	0.487	0.095	0.142	0.149	0.123	0.167	0.141	0.154
111	0.123	0.115	0.153	0.145	0.157	0.596	0.625	0.69	0.768	0.584	0.638	0.693	0.665	0.077	0.139	0.136	0.138	0.142	0.166	0.15	0.146	0.145		111	0.15	0.114	0.146	0.158	0.407	0.533	0.558	0.34	0.459	0.487	0.096	0.142	0.158	0.123	0.168	0.14	0.154
111.25	0.124	0.118	0.158	0.147	0.158	0.6	0.626	0.692	0.774	0.587	0.64	0.693	0.669	0.08	0.14	0.135	0.137	0.142	0.167	0.149	0.147	0.146		111.25	0.152	0.117	0.149	0.157	0.407	0.531	0.561	0.341	0.459	0.489	0.095	0.141	0.159	0.125	0.168	0.138	0.157
111.5	0.126	0.116	0.154	0.148	0.159	0.602	0.63	0.696	0.777	0.59	0.643	0.697	0.671	0.079	0.141	0.138	0.14	0.143	0.169	0.15	0.146	0.148		111.5	0.151	0.113	0.148	0.161	0.408	0.53	0.563	0.343	0.46	0.489	0.094	0.143	0.159	0.124	0.168	0.14	0.157
111.75	0.125	0.118	0.154	0.146	0.163	0.609	0.632	0.698	0.782	0.593	0.646	0.698	0.676	0.079	0.138	0.137	0.141	0.146	0.168	0.152	0.147	0.15		111.75	0.151	0.117	0.147	0.156	0.407	0.53	0.561	0.35	0.459	0.489	0.095	0.143	0.156	0.125	0.169	0.141	0.153
112	0.127	0.118	0.152	0.146	0.164	0.614	0.634	0.701	0.786	0.593	0.646	0.702	0.679	0.083	0.141	0.136	0.144	0.145	0.17	0.149	0.148	0.15		112	0.156	0.117	0.147	0.158	0.408	0.533	0.563	0.35	0.459	0.487	0.095	0.145	0.158	0.129	0.169	0.141	0.154
112.25	0.126	0.116	0.155	0.144	0.166	0.615	0.638	0.704	0.79	0.6	0.651	0.706	0.681	0.085	0.14	0.138	0.143	0.145	0.169	0.151	0.147	0.152		112.25	0.152	0.117	0.147	0.158	0.403	0.532	0.564	0.349	0.459	0.489	0.096	0.142	0.16	0.123	0.168	0.141	0.154
112.5	0.126	0.116	0.151	0.148	0.165	0.617	0.64	0.707	0.794	0.598	0.653	0.708	0.686	0.084	0.139	0.137	0.144	0.145	0.17	0.15	0.145	0.15		112.5	0.152	0.115	0.148	0.158	0.405	0.533	0.566	0.338	0.459	0.491	0.096	0.143	0.159	0.123	0.171	0.14	0.153
112.75	0.126	0.114	0.157	0.144	0.165	0.617	0.644	0.709	0.796	0.601	0.657	0.71	0.687	0.083	0.141	0.136	0.143	0.144	0.169	0.152	0.147	0.153		112.75	0.153	0.114	0.147	0.156	0.405	0.533	0.569	0.342	0.458	0.488	0.096	0.143	0.159	0.125	0.17	0.14	0.154
113	0.126	0.116	0.154	0.148	0.164	0.622	0.645	0.713	0.799	0.604	0.658	0.712	0.69	0.084	0.14	0.137	0.143	0.145	0.169	0.15	0.148	0.15		113	0.152	0.118	0.146	0.158	0.406	0.537	0.568	0.341	0.465	0.491	0.096	0.143	0.157	0.124	0.168	0.138	0.155
113.25	0.126	0.117	0.161	0.149	0.161	0.623	0.648	0.712	0.8	0.605	0.661	0.714	0.692	0.083	0.141	0.136	0.143	0.145	0.168	0.153	0.148	0.151		113.25	0.15	0.117	0.146	0.16	0.408	0.536	0.569	0.339	0.465	0.491	0.095	0.143	0.159	0.126	0.17	0.14	0.155
113.5	0.127	0.116	0.165	0.146	0.158	0.625	0.652	0.717	0.8	0.607	0.663	0.717	0.691	0.084	0.143	0.137	0.141	0.146	0.167	0.154	0.146	0.145		113.5	0.153	0.117	0.148	0.161	0.406	0.541	0.57	0.334	0.466	0.489	0.096	0.144	0.161	0.126	0.168	0.141	0.153
113.75	0.125	0.118	0.162	0.145	0.155	0.625	0.655	0.719	0.803	0.607	0.665	0.719	0.692	0.081	0.142	0.138	0.139	0.144	0.167	0.153	0.147	0.146		113.75	0.151	0.116	0.147	0.155	0.408	0.537	0.571	0.334	0.465	0.487	0.095	0.145	0.157	0.125	0.167	0.139	0.153
114	0.124	0.114	0.163	0.147	0.157	0.628	0.656	0.722	0.804	0.61	0.669	0.723	0.695	0.084	0.142	0.137	0.139	0.144	0.169	0.153	0.147	0.147		114	0.148	0.115	0.146	0.157	0.405	0.535	0.571	0.326	0.464	0.49	0.093	0.141	0.159	0.12	0.164	0.135	0.155
114.25	0.129	0.117	0.164	0.147	0.156	0.632	0.657	0.725	0.804	0.612	0.67	0.726	0.695	0.083	0.143	0.138	0.137	0.146	0.168	0.151	0.147	0.146		114.25	0.148	0.115	0.147	0.156	0.404	0.538	0.569	0.327	0.465	0.491	0.094	0.143	0.157	0.123	0.166	0.139	0.152
114.5	0.124	0.114	0.165	0.145	0.155	0.635	0.662	0.726	0.808	0.615	0.676	0.727	0.698	0.084	0.144	0.136	0.137	0.144	0.169	0.153	0.147	0.146		114.5	0.151	0.116	0.151	0.156	0.401	0.539	0.574	0.33	0.465	0.491	0.095	0.144	0.158	0.123	0.166	0.141	0.151
114.75	0.124	0.114	0.165	0.144	0.153	0.636	0.664	0.729	0.81	0.616	0.675	0.73	0.7	0.082	0.142	0.137	0.136	0.145	0.168	0.152	0.146	0.147		114.75	0.15	0.116	0.147	0.158	0.403	0.538	0.575	0.331	0.464	0.491	0.094	0.142	0.159	0.125	0.168	0.139	0.152
115	0.126	0.115	0.161	0.147	0.151	0.638	0.665	0.733	0.814	0.618	0.679	0.735	0.702	0.082	0.142	0.137	0.135	0.145	0.169	0.153	0.15	0.146		115	0.148	0.115	0.147	0.156	0.404	0.537	0.574	0.333	0.464	0.49	0.095	0.144	0.161	0.124	0.168	0.138	0.155
115.25	0.124	0.116	0.161	0.147	0.151	0.64	0.668	0.736	0.816	0.62	0.68	0.736	0.703	0.083	0.142	0.138	0.135	0.147	0.167	0.153	0.148	0.144		115.25	0.148	0.116	0.148	0.157	0.404	0.541	0.577	0.333	0.464	0.49	0.096	0.143	0.157	0.125	0.169	0.139	0.152
115.5	0.128	0.114	0.162	0.145	0.152	0.644	0.671	0.738	0.819	0.62	0.684	0.738	0.706	0.083	0.141	0.138	0.137	0.146	0.17	0.15	0.147	0.145		115.5	0.15	0.116	0.145	0.158	0.405	0.542	0.579	0.332	0.463	0.492	0.095	0.144	0.159	0.127	0.169	0.136	0.155
115.75	0.127	0.114	0.162	0.146	0.152	0.645	0.671	0.74	0.823	0.624	0.685	0.742	0.71	0.083	0.141	0.139	0.137	0.147	0.171	0.155	0.147	0.146		115.75	0.151	0.117	0.147	0.16	0.405	0.543	0.58	0.337	0.462	0.491	0.095	0.141	0.16	0.128	0.168	0.137	0.155
116	0.126	0.114	0.162	0.149	0.154	0.65	0.674	0.743	0.825	0.626	0.687	0.742	0.714	0.084	0.139	0.137	0.136	0.147	0.169	0.151	0.148	0.148		116	0.151	0.118	0.145	0.157	0.406	0.542	0.581	0.335	0.464	0.49	0.095	0.144	0.158	0.131	0.17	0.135	0.152
116.25	0.128	0.116	0.158	0.149	0.154	0.651	0.675	0.746	0.83	0.629	0.688	0.746	0.717	0.083	0.139	0.137	0.138	0.148	0.172	0.15	0.147	0.149		116.25	0.149	0.116	0.146	0.158	0.404	0.544	0.583	0.334	0.462	0.492	0.096	0.143	0.159	0.127	0.17	0.136	0.153
116.5	0.127	0.115	0.162	0.146	0.156	0.654	0.68	0.75	0.836	0.632	0.694	0.748	0.721	0.084	0.141	0.136	0.138	0.147	0.172	0.152	0.146	0.15		116.5	0.152	0.117	0.147	0.159	0.405	0.542	0.585	0.336	0.463	0.49	0.096	0.14	0.158	0.126	0.172	0.133	0.153
116.75	0.127	0.115	0.161	0.146	0.157	0.655	0.682	0.751	0.839	0.634	0.696	0.751	0.724	0.083	0.141	0.136	0.139	0.148	0.171	0.153	0.147	0.149		116.75	0.15	0.116	0.144	0.159	0.406	0.546	0.584	0.334	0.462	0.49	0.096	0.142	0.159	0.126	0.167	0.138	0.152
117	0.129	0.115	0.159	0.147	0.158	0.66	0.682	0.752	0.842	0.637	0.697	0.753	0.726	0.084	0.139	0.138	0.139	0.147	0.172	0.153	0.146	0.149		117	0.154	0.119	0.145	0.156	0.412	0.545	0.585	0.336	0.467	0.49	0.097	0.142	0.159	0.132	0.173	0.137	0.153
117.25	0.127	0.121	0.161	0.147	0.159	0.66	0.687	0.756	0.846	0.637	0.701	0.756	0.732	0.084	0.145	0.14	0.141	0.148	0.17	0.152	0.147	0.152		117.25	0.153	0.12	0.147	0.158	0.409	0.545	0.585	0.335	0.469	0.489	0.095	0.144	0.159	0.128	0.171	0.138	0.156
117.5	0.131	0.114	0.161	0.145	0.16	0.665	0.688	0.759	0.85	0.64	0.703	0.76	0.734	0.085	0.144	0.137	0.141	0.149	0.173	0.154	0.149	0.15		117.5	0.152	0.12	0.15	0.158	0.411	0.547	0.586	0.335	0.473	0.489	0.096	0.144	0.158	0.129	0.173	0.146	0.153
117.75	0.128	0.116	0.164	0.148	0.161	0.664	0.694	0.761	0.854	0.64	0.708	0.76	0.737	0.083	0.144	0.139	0.142	0.148	0.173	0.156	0.147	0.152		117.75	0.15	0.119	0.151	0.159	0.408	0.549	0.589	0.335	0.473	0.491	0.099	0.148	0.158	0.131	0.172	0.147	0.153
118	0.129	0.118	0.166	0.146	0.163	0.668	0.698	0.764	0.857	0.644	0.708	0.765	0.741	0.086	0.146	0.138	0.145	0.15	0.173	0.153	0.146	0.152		118	0.153	0.123	0.153	0.156	0.409	0.55	0.586	0.334	0.471	0.491	0.097	0.147	0.158	0.132	0.174	0.143	0.151
118.25	0.129	0.118	0.166	0.147	0.163	0.671	0.703	0.767	0.862	0.648	0.712	0.767	0.742	0.087	0.146	0.137	0.144	0.15	0.172	0.154	0.145	0.153		118.25	0.153	0.119	0.153	0.161	0.412	0.548	0.591	0.333	0.474	0.491	0.097	0.148	0.157	0.132	0.172	0.144	0.154
118.5	0.129	0.117	0.167	0.147	0.162	0.674	0.704	0.77	0.865	0.648	0.716	0.771	0.747	0.085	0.146	0.139	0.144	0.149	0.172	0.155	0.148	0.153		118.5	0.154	0.119	0.154	0.158	0.408	0.549	0.591	0.336	0.474	0.491	0.097	0.146	0.159	0.132	0.172	0.145	0.151
118.75	0.132	0.117	0.168	0.145	0.16	0.676	0.706	0.772	0.867	0.65	0.721	0.772	0.748	0.084	0.145	0.139	0.139	0.15	0.175	0.159	0.148	0.15		118.75	0.152	0.119	0.151	0.155	0.411	0.547	0.588	0.333	0.475	0.49	0.097	0.147	0.156	0.134	0.172	0.143	0.15
119	0.129	0.115	0.169	0.142	0.159	0.68	0.71	0.772	0.866	0.653	0.722	0.774	0.748	0.086	0.145	0.137	0.139	0.149	0.175	0.157	0.147	0.151		119	0.152	0.118	0.152	0.157	0.408	0.551	0.589	0.332	0.473	0.491	0.098	0.145	0.157	0.132	0.172	0.143	0.15
119.25	0.125	0.115	0.167	0.145	0.157	0.68	0.71	0.779	0.869	0.653	0.724	0.777	0.749	0.085	0.145	0.139	0.137	0.149	0.172	0.153	0.147	0.149		119.25	0.153	0.117	0.151	0.159	0.41	0.547	0.59	0.335	0.471	0.49	0.096	0.145	0.156	0.135	0.173	0.141	0.151
119.5	0.13	0.116	0.165	0.145	0.156	0.684	0.711	0.78	0.871	0.655	0.724	0.78	0.753	0.085	0.145	0.138	0.136	0.152	0.174	0.154	0.149	0.146		119.5	0.152	0.12	0.15	0.159	0.408	0.547	0.593	0.332	0.472	0.49	0.097	0.147	0.156	0.134	0.174	0.14	0.154
119.75	0.132	0.12	0.162	0.144	0.153	0.687	0.714	0.782	0.874	0.659	0.727	0.781	0.756	0.088	0.141	0.136	0.136	0.15	0.173	0.152	0.147	0.148		119.75	0.152	0.122	0.145	0.158	0.408	0.546	0.593	0.337	0.471	0.488	0.098	0.141	0.157	0.133	0.172	0.137	0.152
120	0.13	0.117	0.162	0.146	0.154	0.689	0.714	0.786	0.877	0.661	0.728	0.786	0.757	0.084	0.143	0.139	0.136	0.15	0.174	0.151	0.148	0.147		120	0.153	0.12	0.145	0.16	0.41	0.545	0.594	0.332	0.469	0.49	0.098	0.143	0.157	0.135	0.172	0.135	0.154
120.25	0.132	0.121	0.161	0.145	0.156	0.689	0.715	0.787	0.88	0.662	0.73	0.79	0.761	0.086	0.14	0.137	0.137	0.151	0.174	0.15	0.146	0.148		120.25	0.152	0.12	0.145	0.156	0.408	0.546	0.594	0.33	0.468	0.489	0.098	0.141	0.158	0.134	0.172	0.136	0.15
120.5	0.131	0.118	0.162	0.145	0.154	0.692	0.719	0.791	0.882	0.666	0.733	0.793	0.764	0.086	0.14	0.138	0.136	0.151	0.174	0.151	0.148	0.148		120.5	0.153	0.122	0.144	0.158	0.409	0.546	0.595	0.332	0.472	0.488	0.097	0.14	0.159	0.137	0.173	0.138	0.152
120.75	0.132	0.117	0.162	0.143	0.15	0.694	0.72	0.793	0.883	0.667	0.735	0.795	0.766	0.086	0.139	0.135	0.135	0.151	0.173	0.149	0.146	0.15		120.75	0.149	0.119	0.147	0.157	0.404	0.544	0.594	0.332	0.47	0.49	0.096	0.141	0.159	0.133	0.172	0.137	0.151
121	0.131	0.117	0.162	0.146	0.154	0.699	0.725	0.796	0.89	0.669	0.739	0.796	0.768	0.086	0.141	0.137	0.137	0.151	0.175	0.153	0.149	0.148		121	0.153	0.119	0.147	0.16	0.403	0.548	0.598	0.33	0.47	0.489	0.097	0.143	0.158	0.134	0.172	0.138	0.151
121.25	0.127	0.116	0.163	0.145	0.158	0.705	0.728	0.801	0.894	0.671	0.741	0.801	0.773	0.086	0.142	0.138	0.139	0.15	0.174	0.153	0.147	0.15		121.25	0.15	0.12	0.149	0.158	0.405	0.549	0.598	0.331	0.47	0.486	0.096	0.144	0.157	0.132	0.174	0.139	0.152
121.5	0.129	0.117	0.165	0.145	0.161	0.707	0.732	0.803	0.898	0.673	0.745	0.802	0.779	0.085	0.143	0.138	0.14	0.151	0.175	0.154	0.148	0.153		121.5	0.153	0.12	0.147	0.158	0.406	0.547	0.598	0.332	0.471	0.487	0.096	0.141	0.159	0.135	0.17	0.139	0.153
121.75	0.126	0.114	0.162	0.143	0.16	0.708	0.733	0.805	0.902	0.673	0.747	0.806	0.782	0.083	0.144	0.137	0.141	0.148	0.172	0.15	0.149	0.151		121.75	0.148	0.117	0.149	0.162	0.407	0.547	0.608	0.33	0.47	0.487	0.095	0.143	0.158	0.133	0.169	0.138	0.154
122	0.127	0.114	0.162	0.146	0.162	0.712	0.737	0.809	0.906	0.677	0.75	0.807	0.786	0.083	0.141	0.139	0.141	0.15	0.172	0.153	0.148	0.153		122	0.153	0.115	0.15	0.16	0.409	0.547	0.61	0.33	0.47	0.486	0.097	0.142	0.159	0.133	0.173	0.141	0.153
122.25	0.131	0.114	0.165	0.146	0.159	0.714	0.74	0.811	0.909	0.678	0.756	0.812	0.788	0.084	0.144	0.139	0.142	0.149	0.173	0.155	0.147	0.153		122.25	0.147	0.117	0.148	0.159	0.408	0.546	0.611	0.33	0.469	0.487	0.093	0.144	0.156	0.131	0.17	0.141	0.154
122.5	0.127	0.115	0.165	0.145	0.159	0.716	0.743	0.814	0.913	0.679	0.756	0.816	0.788	0.084	0.144	0.137	0.14	0.148	0.173	0.155	0.148	0.151		122.5	0.144	0.117	0.149	0.159	0.405	0.546	0.611	0.326	0.469	0.488	0.091	0.146	0.16	0.126	0.162	0.139	0.153
122.75	0.123	0.113	0.166	0.144	0.156	0.717	0.746	0.817	0.914	0.679	0.76	0.819	0.792	0.081	0.144	0.14	0.139	0.148	0.168	0.154	0.149	0.151		122.75	0.144	0.113	0.149	0.162	0.403	0.548	0.613	0.325	0.47	0.497	0.09	0.145	0.158	0.126	0.161	0.142	0.152
123	0.12	0.111	0.163	0.144	0.155	0.717	0.749	0.82	0.914	0.682	0.761	0.822	0.793	0.081	0.144	0.14	0.137	0.146	0.168	0.155	0.149	0.149		123	0.141	0.118	0.149	0.159	0.404	0.548	0.612	0.329	0.47	0.502	0.09	0.144	0.157	0.124	0.162	0.14	0.154
123.25	0.121	0.114	0.162	0.147	0.156	0.718	0.748	0.823	0.918	0.682	0.763	0.824	0.795	0.08	0.142	0.14	0.137	0.146	0.169	0.153	0.149	0.15		123.25	0.143	0.114	0.148	0.16	0.402	0.547	0.617	0.33	0.469	0.503	0.089	0.143	0.159	0.124	0.16	0.14	0.154
123.5	0.12	0.122	0.163	0.146	0.154	0.721	0.753	0.825	0.921	0.685	0.766	0.827	0.799	0.079	0.14	0.14	0.135	0.146	0.167	0.154	0.148	0.151		123.5	0.142	0.113	0.147	0.16	0.404	0.545	0.617	0.333	0.468	0.505	0.09	0.144	0.158	0.123	0.159	0.136	0.154
123.75	0.12	0.114	0.162	0.145	0.155	0.723	0.755	0.827	0.924	0.687	0.769	0.829	0.799	0.08	0.142	0.14	0.137	0.145	0.168	0.152	0.148	0.149		123.75	0.143	0.115	0.143	0.16	0.402	0.546	0.617	0.333	0.467	0.503	0.091	0.143	0.159	0.124	0.162	0.136	0.153
124	0.119	0.115	0.159	0.145	0.155	0.727	0.757	0.831	0.926	0.691	0.769	0.832	0.803	0.079	0.145	0.138	0.134	0.147	0.168	0.154	0.149	0.149		124	0.144	0.115	0.144	0.158	0.403	0.544	0.618	0.333	0.467	0.502	0.091	0.142	0.159	0.125	0.164	0.137	0.152
124.25	0.122	0.112	0.156	0.144	0.157	0.729	0.76	0.834	0.933	0.692	0.772	0.833	0.81	0.082	0.14	0.138	0.14	0.145	0.168	0.152	0.148	0.151		124.25	0.145	0.116	0.148	0.16	0.407	0.547	0.62	0.336	0.469	0.504	0.092	0.144	0.162	0.129	0.162	0.135	0.154
124.5	0.124	0.114	0.161	0.144	0.157	0.732	0.765	0.836	0.937	0.696	0.776	0.836	0.811	0.081	0.141	0.138	0.138	0.148	0.171	0.154	0.148	0.153		124.5	0.145	0.119	0.149	0.161	0.405	0.545	0.621	0.332	0.469	0.503	0.093	0.146	0.162	0.128	0.166	0.139	0.156
124.75	0.123	0.113	0.162	0.143	0.161	0.734	0.767	0.839	0.942	0.697	0.777	0.838	0.816	0.08	0.141	0.138	0.14	0.149	0.17	0.152	0.147	0.154		124.75	0.144	0.115	0.15	0.16	0.402	0.547	0.622	0.333	0.47	0.505	0.095	0.143	0.159	0.13	0.168	0.139	0.153
125	0.126	0.115	0.162	0.146	0.161	0.74	0.771	0.843	0.946	0.7	0.782	0.841	0.822	0.083	0.143	0.137	0.139	0.148	0.172	0.152	0.15	0.154		125	0.148	0.117	0.149	0.163	0.404	0.545	0.622	0.335	0.468	0.502	0.096	0.144	0.16	0.134	0.166	0.138	0.153
125.25	0.129	0.114	0.164	0.142	0.161	0.741	0.773	0.846	0.947	0.702	0.785	0.844	0.824	0.084	0.143	0.138	0.141	0.148	0.173	0.155	0.146	0.153		125.25	0.144	0.117	0.148	0.162	0.403	0.546	0.621	0.333	0.468	0.504	0.096	0.144	0.16	0.133	0.167	0.137	0.153
125.5	0.126	0.116	0.163	0.144	0.159	0.745	0.778	0.848	0.95	0.706	0.787	0.848	0.826	0.084	0.143	0.138	0.138	0.149	0.174	0.155	0.148	0.153		125.5	0.148	0.118	0.148	0.161	0.404	0.548	0.623	0.333	0.465	0.503	0.097	0.143	0.16	0.132	0.169	0.138	0.153
125.75	0.129	0.115	0.163	0.146	0.158	0.747	0.779	0.85	0.951	0.708	0.789	0.851	0.827	0.083	0.144	0.138	0.141	0.149	0.173	0.155	0.147	0.151		125.75	0.15	0.117	0.147	0.162	0.402	0.547	0.626	0.333	0.466	0.503	0.097	0.144	0.16	0.133	0.168	0.138	0.156
126	0.126	0.116	0.162	0.147	0.159	0.75	0.782	0.855	0.955	0.709	0.791	0.855	0.829	0.083	0.142	0.138	0.136	0.151	0.172	0.153	0.147	0.151		126	0.146	0.116	0.146	0.16	0.402	0.545	0.624	0.333	0.466	0.503	0.096	0.143	0.161	0.131	0.168	0.139	0.152
126.25	0.125	0.115	0.162	0.147	0.155	0.752	0.782	0.857	0.956	0.711	0.794	0.857	0.83	0.086	0.142	0.14	0.136	0.15	0.172	0.153	0.147	0.15		126.25	0.151	0.116	0.148	0.161	0.405	0.547	0.626	0.334	0.467	0.503	0.101	0.145	0.158	0.135	0.171	0.137	0.155
126.5	0.127	0.115	0.162	0.146	0.154	0.756	0.787	0.862	0.96	0.714	0.795	0.862	0.833	0.086	0.142	0.138	0.135	0.151	0.172	0.154	0.149	0.148		126.5	0.152	0.119	0.146	0.163	0.402	0.544	0.627	0.333	0.467	0.502	0.102	0.142	0.162	0.137	0.172	0.136	0.153
126.75	0.136	0.116	0.165	0.145	0.154	0.757	0.789	0.864	0.963	0.715	0.8	0.864	0.837	0.084	0.144	0.139	0.138	0.149	0.171	0.153	0.148	0.148		126.75	0.149	0.118	0.146	0.161	0.404	0.547	0.626	0.334	0.467	0.505	0.1	0.144	0.159	0.134	0.168	0.135	0.155
127	0.127	0.117	0.161	0.146	0.156	0.761	0.791	0.868	0.967	0.717	0.8	0.867	0.841	0.084	0.14	0.138	0.136	0.15	0.171	0.152	0.147	0.148		127	0.148	0.117	0.146	0.162	0.401	0.543	0.629	0.335	0.465	0.502	0.103	0.141	0.162	0.133	0.169	0.135	0.155
127.25	0.126	0.117	0.159	0.144	0.159	0.762	0.795	0.87	0.971	0.721	0.803	0.871	0.843	0.084	0.14	0.138	0.137	0.151	0.173	0.154	0.148	0.152		127.25	0.147	0.12	0.146	0.165	0.402	0.543	0.627	0.33	0.466	0.501	0.1	0.141	0.161	0.131	0.166	0.135	0.154
127.5	0.124	0.114	0.162	0.146	0.161	0.764	0.796	0.874	0.976	0.721	0.806	0.873	0.85	0.083	0.141	0.139	0.14	0.148	0.172	0.153	0.146	0.154		127.5	0.145	0.117	0.147	0.163	0.4	0.549	0.632	0.331	0.466	0.502	0.096	0.143	0.161	0.126	0.161	0.136	0.154
127.75	0.122	0.113	0.163	0.143	0.162	0.764	0.798	0.877	0.981	0.721	0.808	0.875	0.853	0.082	0.14	0.139	0.14	0.148	0.169	0.153	0.148	0.155		127.75	0.144	0.118	0.147	0.162	0.4	0.546	0.63	0.329	0.464	0.503	0.096	0.143	0.16	0.126	0.161	0.137	0.155
128	0.123	0.11	0.163	0.145	0.16	0.765	0.803	0.881	0.985	0.723	0.812	0.878	0.858	0.081	0.143	0.14	0.141	0.146	0.167	0.155	0.149	0.154		128	0.142	0.119	0.146	0.163	0.396	0.548	0.634	0.329	0.468	0.503	0.093	0.144	0.161	0.127	0.158	0.137	0.153
128.25	0.12	0.11	0.162	0.145	0.16	0.759	0.805	0.884	0.986	0.724	0.814	0.882	0.861	0.079	0.14	0.143	0.141	0.147	0.166	0.155	0.151	0.154		128.25	0.142	0.116	0.149	0.163	0.396	0.547	0.632	0.328	0.465	0.502	0.093	0.144	0.159	0.122	0.157	0.137	0.154
128.5	0.12	0.112	0.161	0.144	0.161	0.768	0.808	0.884	0.989	0.727	0.818	0.886	0.861	0.081	0.143	0.141	0.141	0.147	0.169	0.155	0.147	0.154		128.5	0.143	0.115	0.148	0.164	0.398	0.549	0.633	0.326	0.465	0.503	0.094	0.144	0.16	0.125	0.161	0.137	0.153
128.75	0.121	0.112	0.161	0.146	0.157	0.773	0.811	0.889	0.99	0.73	0.819	0.887	0.863	0.082	0.141	0.14	0.137	0.148	0.169	0.153	0.147	0.15		128.75	0.144	0.118	0.148	0.162	0.397	0.547	0.634	0.329	0.463	0.501	0.097	0.143	0.161	0.128	0.162	0.139	0.155
129	0.122	0.112	0.159	0.147	0.153	0.776	0.813	0.893	0.992	0.734	0.822	0.892	0.865	0.081	0.142	0.14	0.136	0.147	0.167	0.153	0.151	0.148		129	0.147	0.121	0.146	0.163	0.4	0.548	0.636	0.33	0.464	0.502	0.098	0.144	0.159	0.131	0.162	0.14	0.154
129.25	0.122	0.112	0.163	0.146	0.155	0.779	0.818	0.897	0.993	0.735	0.827	0.896	0.87	0.082	0.144	0.142	0.137	0.149	0.17	0.156	0.146	0.151		129.25	0.147	0.121	0.149	0.164	0.402	0.551	0.637	0.329	0.464	0.501	0.1	0.146	0.16	0.13	0.165	0.141	0.152
129.5	0.122	0.115	0.159	0.146	0.154	0.784	0.818	0.899	0.996	0.739	0.827	0.897	0.87	0.082	0.143	0.139	0.136	0.149	0.172	0.154	0.148	0.151		129.5	0.149	0.12	0.149	0.162	0.401	0.55	0.637	0.328	0.466	0.501	0.099	0.143	0.161	0.13	0.164	0.136	0.155
129.75	0.123	0.115	0.162	0.146	0.156	0.786	0.821	0.901	0.999	0.74	0.83	0.902	0.873	0.081	0.144	0.141	0.136	0.149	0.17	0.155	0.15	0.148		129.75	0.147	0.121	0.148	0.164	0.401	0.547	0.638	0.328	0.465	0.503	0.1	0.143	0.16	0.131	0.166	0.138	0.154
130	0.125	0.115	0.16	0.144	0.159	0.79	0.823	0.903	1.005	0.744	0.833	0.903	0.878	0.083	0.143	0.14	0.137	0.151	0.172	0.154	0.148	0.151		130	0.149	0.121	0.147	0.165	0.401	0.546	0.638	0.33	0.463	0.501	0.1	0.143	0.159	0.135	0.166	0.133	0.155
130.25	0.125	0.114	0.159	0.146	0.162	0.793	0.826	0.907	1.012	0.747	0.832	0.908	0.882	0.083	0.139	0.14	0.14	0.152	0.172	0.154	0.148	0.154		130.25	0.149	0.121	0.146	0.163	0.402	0.549	0.64	0.332	0.463	0.5	0.101	0.14	0.158	0.132	0.168	0.133	0.155
130.5	0.123	0.125	0.159	0.146	0.162	0.794	0.827	0.912	1.014	0.747	0.835	0.911	0.887	0.083	0.139	0.14	0.139	0.15	0.172	0.154	0.148	0.156		130.5	0.149	0.12	0.149	0.161	0.4	0.549	0.639	0.331	0.464	0.501	0.1	0.143	0.159	0.134	0.168	0.138	0.154
130.75	0.126	0.115	0.163	0.145	0.161	0.797	0.833	0.914	1.017	0.751	0.84	0.915	0.889	0.084	0.144	0.14	0.143	0.151	0.172	0.155	0.147	0.155		130.75	0.149	0.121	0.148	0.163	0.402	0.551	0.64	0.333	0.464	0.5	0.099	0.145	0.161	0.134	0.166	0.139	0.153
131	0.127	0.123	0.162	0.146	0.161	0.801	0.836	0.916	1.023	0.753	0.841	0.916	0.894	0.083	0.143	0.14	0.141	0.151	0.172	0.155	0.149	0.154		131	0.149	0.123	0.149	0.164	0.4	0.546	0.642	0.333	0.464	0.498	0.101	0.144	0.159	0.135	0.169	0.137	0.155
131.25	0.128	0.115	0.162	0.145	0.16	0.804	0.838	0.92	1.021	0.756	0.846	0.919	0.894	0.084	0.142	0.138	0.139	0.153	0.173	0.154	0.147	0.154		131.25	0.148	0.122	0.15	0.163	0.402	0.549	0.644	0.333	0.465	0.501	0.1	0.144	0.158	0.136	0.168	0.137	0.153
131.5	0.125	0.114	0.162	0.145	0.157	0.804	0.841	0.924	1.023	0.759	0.85	0.923	0.899	0.084	0.144	0.139	0.138	0.152	0.172	0.155	0.148	0.15		131.5	0.15	0.123	0.146	0.165	0.4	0.55	0.644	0.333	0.464	0.5	0.1	0.143	0.16	0.134	0.167	0.138	0.155
131.75	0.125	0.116	0.161	0.145	0.156	0.809	0.845	0.926	1.027	0.761	0.851	0.926	0.899	0.085	0.144	0.14	0.137	0.152	0.172	0.157	0.15	0.152		131.75	0.148	0.122	0.15	0.164	0.4	0.548	0.646	0.333	0.464	0.501	0.1	0.146	0.159	0.133	0.168	0.14	0.155
132	0.128	0.115	0.163	0.145	0.158	0.811	0.846	0.928	1.029	0.764	0.854	0.928	0.902	0.086	0.141	0.139	0.138	0.151	0.172	0.153	0.148	0.152		132	0.151	0.122	0.15	0.164	0.398	0.549	0.644	0.333	0.464	0.497	0.099	0.144	0.159	0.134	0.167	0.138	0.154
132.25	0.126	0.114	0.164	0.145	0.155	0.812	0.848	0.932	1.029	0.764	0.857	0.931	0.906	0.083	0.143	0.14	0.135	0.15	0.172	0.156	0.15	0.153		132.25	0.146	0.12	0.148	0.164	0.396	0.545	0.646	0.331	0.464	0.501	0.096	0.145	0.16	0.132	0.165	0.14	0.155
132.5	0.122	0.115	0.162	0.144	0.154	0.816	0.852	0.935	1.033	0.765	0.857	0.935	0.907	0.083	0.14	0.14	0.135	0.151	0.172	0.154	0.149	0.149		132.5	0.144	0.117	0.149	0.164	0.394	0.545	0.649	0.327	0.462	0.498	0.095	0.144	0.16	0.128	0.16	0.138	0.153
132.75	0.121	0.109	0.165	0.145	0.158	0.815	0.853	0.937	1.037	0.766	0.862	0.94	0.911	0.081	0.141	0.139	0.14	0.148	0.17	0.155	0.15	0.152		132.75	0.143	0.117	0.149	0.164	0.393	0.546	0.649	0.328	0.464	0.5	0.096	0.143	0.158	0.128	0.161	0.137	0.155
133	0.121	0.113	0.161	0.146	0.158	0.818	0.857	0.941	1.041	0.768	0.863	0.941	0.916	0.08	0.141	0.14	0.138	0.15	0.168	0.153	0.149	0.154		133	0.142	0.117	0.148	0.164	0.395	0.548	0.65	0.327	0.463	0.497	0.096	0.145	0.162	0.126	0.159	0.138	0.156
133.25	0.12	0.112	0.161	0.148	0.159	0.818	0.858	0.946	1.045	0.77	0.867	0.943	0.919	0.081	0.14	0.14	0.139	0.15	0.167	0.154	0.149	0.152		133.25	0.139	0.116	0.146	0.164	0.392	0.547	0.651	0.325	0.463	0.496	0.093	0.143	0.162	0.124	0.158	0.136	0.154
133.5	0.119	0.111	0.162	0.147	0.161	0.819	0.863	0.947	1.051	0.771	0.868	0.946	0.923	0.08	0.14	0.14	0.139	0.146	0.167	0.156	0.149	0.155		133.5	0.141	0.12	0.147	0.165	0.394	0.545	0.65	0.327	0.464	0.496	0.096	0.143	0.162	0.129	0.159	0.137	0.154
133.75	0.122	0.113	0.16	0.145	0.162	0.823	0.864	0.95	1.053	0.775	0.87	0.95	0.928	0.082	0.143	0.138	0.14	0.149	0.17	0.154	0.148	0.155		133.75	0.145	0.119	0.147	0.167	0.395	0.546	0.653	0.325	0.464	0.495	0.097	0.141	0.163	0.127	0.162	0.136	0.153
134	0.123	0.111	0.16	0.148	0.162	0.828	0.868	0.955	1.058	0.778	0.873	0.954	0.931	0.082	0.139	0.14	0.14	0.149	0.171	0.153	0.149	0.156		134	0.146	0.118	0.149	0.164	0.393	0.547	0.653	0.328	0.461	0.497	0.098	0.141	0.164	0.129	0.163	0.136	0.156
134.25	0.124	0.114	0.158	0.145	0.161	0.827	0.87	0.956	1.059	0.78	0.876	0.955	0.933	0.083	0.142	0.14	0.139	0.152	0.172	0.155	0.148	0.154		134.25	0.148	0.119	0.148	0.163	0.396	0.547	0.652	0.326	0.463	0.498	0.096	0.142	0.162	0.13	0.164	0.136	0.153
134.5	0.122	0.117	0.163	0.145	0.158	0.832	0.874	0.959	1.059	0.782	0.879	0.959	0.936	0.083	0.143	0.141	0.139	0.15	0.168	0.154	0.151	0.153		134.5	0.146	0.12	0.151	0.165	0.397	0.549	0.653	0.329	0.464	0.497	0.099	0.145	0.16	0.132	0.167	0.139	0.153
134.75	0.123	0.113	0.161	0.145	0.158	0.838	0.878	0.962	1.061	0.784	0.883	0.963	0.938	0.085	0.144	0.139	0.136	0.15	0.169	0.154	0.149	0.154		134.75	0.15	0.12	0.148	0.164	0.393	0.547	0.655	0.328	0.464	0.496	0.101	0.142	0.163	0.132	0.166	0.14	0.155
135	0.121	0.113	0.16	0.146	0.154	0.841	0.88	0.964	1.061	0.786	0.885	0.964	0.938	0.084	0.142	0.137	0.136	0.15	0.171	0.153	0.148	0.151		135	0.147	0.12	0.152	0.163	0.397	0.547	0.656	0.329	0.464	0.496	0.1	0.145	0.163	0.135	0.168	0.137	0.154
135.25	0.125	0.116	0.161	0.145	0.154	0.842	0.883	0.968	1.066	0.791	0.887	0.968	0.941	0.086	0.14	0.141	0.137	0.152	0.172	0.155	0.15	0.15		135.25	0.148	0.119	0.15	0.164	0.395	0.548	0.657	0.327	0.465	0.497	0.099	0.145	0.162	0.136	0.17	0.138	0.154
135.5	0.124	0.115	0.163	0.146	0.156	0.845	0.884	0.972	1.069	0.791	0.891	0.971	0.945	0.085	0.142	0.14	0.136	0.152	0.171	0.155	0.15	0.152		135.5	0.149	0.121	0.15	0.165	0.398	0.546	0.66	0.328	0.463	0.497	0.099	0.144	0.162	0.137	0.167	0.139	0.154
135.75	0.131	0.116	0.161	0.145	0.155	0.849	0.888	0.976	1.073	0.795	0.893	0.975	0.947	0.085	0.142	0.14	0.137	0.152	0.173	0.153	0.15	0.153		135.75	0.15	0.123	0.149	0.167	0.393	0.547	0.661	0.328	0.464	0.497	0.098	0.144	0.161	0.133	0.167	0.136	0.156
136	0.125	0.115	0.165	0.148	0.16	0.851	0.893	0.979	1.08	0.796	0.899	0.975	0.954	0.085	0.144	0.141	0.14	0.152	0.171	0.157	0.15	0.157		136	0.148	0.121	0.151	0.164	0.4	0.546	0.662	0.328	0.462	0.497	0.098	0.144	0.163	0.139	0.168	0.138	0.157
136.25	0.127	0.114	0.164	0.148	0.161	0.854	0.893	0.982	1.081	0.799	0.9	0.979	0.958	0.085	0.143	0.142	0.14	0.152	0.172	0.154	0.151	0.156		136.25	0.147	0.12	0.153	0.166	0.402	0.55	0.661	0.327	0.463	0.496	0.096	0.145	0.162	0.137	0.168	0.138	0.157
136.5	0.126	0.114	0.165	0.146	0.161	0.857	0.9	0.985	1.087	0.802	0.903	0.984	0.96	0.087	0.142	0.141	0.14	0.154	0.173	0.155	0.151	0.156		136.5	0.148	0.12	0.15	0.165	0.396	0.546	0.663	0.325	0.462	0.495	0.096	0.143	0.161	0.135	0.168	0.138	0.154
136.75	0.127	0.115	0.161	0.146	0.162	0.859	0.898	0.988	1.09	0.804	0.902	0.984	0.966	0.087	0.143	0.14	0.142	0.151	0.172	0.154	0.148	0.158		136.75	0.147	0.119	0.148	0.166	0.397	0.546	0.665	0.328	0.462	0.494	0.097	0.143	0.16	0.135	0.169	0.136	0.154
137	0.128	0.115	0.161	0.148	0.161	0.864	0.902	0.992	1.092	0.806	0.908	0.988	0.968	0.086	0.142	0.141	0.138	0.151	0.174	0.157	0.15	0.156		137	0.147	0.12	0.148	0.167	0.388	0.546	0.665	0.325	0.461	0.494	0.097	0.144	0.164	0.134	0.169	0.134	0.159
137.25	0.124	0.114	0.16	0.15	0.16	0.862	0.902	0.992	1.092	0.806	0.909	0.991	0.968	0.087	0.139	0.143	0.137	0.151	0.173	0.155	0.15	0.154		137.25	0.147	0.118	0.076	0.165	0.387	0.545	0.668	0.326	0.459	0.496	0.097	0.14	0.163	0.135	0.167	0.131	0.156
137.5	0.126	0.115	0.161	0.148	0.155	0.867	0.906	0.996	1.094	0.808	0.91	0.995	0.972	0.087	0.14	0.143	0.137	0.151	0.171	0.154	0.149	0.156		137.5	0.143	0.12	0.143	0.168	0.383	0.544	0.669	0.324	0.464	0.497	0.092	0.143	0.161	0.129	0.16	0.132	0.159
137.75	0.124	0.115	0.157	0.15	0.155	0.867	0.908	0.999	1.094	0.808	0.911	0.996	0.972	0.085	0.141	0.141	0.135	0.15	0.174	0.156	0.15	0.152		137.75	0.142	0.116	0.144	0.168	0.381	0.544	0.669	0.327	0.467	0.499	0.091	0.141	0.163	0.129	0.159	0.133	0.155
138	0.118	0.114	0.158	0.15	0.155	0.867	0.909	1.002	1.097	0.809	0.915	1.001	0.975	0.082	0.141	0.143	0.136	0.149	0.17	0.153	0.15	0.153		138	0.14	0.116	0.142	0.166	0.376	0.54	0.67	0.325	0.467	0.496	0.091	0.142	0.166	0.127	0.157	0.131	0.156
138.25	0.121	0.111	0.158	0.15	0.157	0.862	0.912	1.005	1.097	0.809	0.917	1.004	0.978	0.08	0.138	0.143	0.138	0.147	0.169	0.152	0.149	0.154		138.25	0.139	0.116	0.141	0.168	0.377	0.543	0.673	0.325	0.467	0.499	0.093	0.14	0.164	0.13	0.16	0.13	0.158
138.5	0.122	0.111	0.156	0.149	0.159	0.871	0.914	1.008	1.105	0.815	0.92	1.004	0.982	0.083	0.138	0.142	0.136	0.149	0.169	0.153	0.15	0.155		138.5	0.143	0.118	0.143	0.166	0.374	0.541	0.671	0.328	0.464	0.499	0.093	0.139	0.163	0.132	0.161	0.127	0.155
138.75	0.121	0.112	0.154	0.149	0.159	0.873	0.912	1.011	1.106	0.82	0.919	1.008	0.985	0.085	0.136	0.144	0.138	0.154	0.171	0.151	0.15	0.155		138.75	0.143	0.117	0.144	0.164	0.376	0.541	0.671	0.325	0.463	0.497	0.093	0.141	0.162	0.132	0.162	0.131	0.152
139	0.123	0.112	0.156	0.147	0.16	0.877	0.916	1.012	1.108	0.823	0.923	1.011	0.989	0.084	0.136	0.142	0.139	0.15	0.17	0.154	0.15	0.154		139	0.145	0.12	0.146	0.163	0.381	0.542	0.669	0.324	0.467	0.496	0.093	0.141	0.158	0.132	0.164	0.134	0.151
139.25	0.123	0.114	0.157	0.148	0.16	0.88	0.921	1.015	1.112	0.825	0.927	1.014	0.991	0.084	0.138	0.14	0.138	0.149	0.169	0.154	0.15	0.155		139.25	0.145	0.121	0.149	0.166	0.381	0.544	0.672	0.33	0.467	0.495	0.094	0.144	0.158	0.134	0.163	0.136	0.151
139.5	0.123	0.114	0.159	0.147	0.162	0.882	0.925	1.017	1.118	0.827	0.931	1.014	0.996	0.085	0.139	0.14	0.14	0.152	0.17	0.155	0.148	0.158		139.5	0.147	0.122	0.147	0.165	0.378	0.544	0.673	0.326	0.469	0.496	0.095	0.144	0.159	0.138	0.166	0.136	0.15
139.75	0.122	0.112	0.158	0.146	0.162	0.885	0.928	1.017	1.118	0.829	0.935	1.015	0.999	0.083	0.139	0.14	0.141	0.15	0.172	0.153	0.147	0.156		139.75	0.144	0.121	0.149	0.164	0.379	0.544	0.673	0.327	0.467	0.496	0.094	0.142	0.157	0.134	0.165	0.136	0.15
140	0.126	0.113	0.157	0.144	0.163	0.892	0.931	1.018	1.121	0.834	0.936	1.019	1.002	0.087	0.14	0.14	0.141	0.152	0.174	0.155	0.147	0.155		140	0.145	0.122	0.149	0.162	0.382	0.544	0.672	0.325	0.47	0.493	0.093	0.144	0.156	0.136	0.166	0.136	0.147
140.25	0.125	0.112	0.161	0.144	0.159	0.891	0.935	1.02	1.121	0.836	0.941	1.02	1.007	0.085	0.141	0.139	0.14	0.152	0.172	0.155	0.147	0.156		140.25	0.148	0.12	0.152	0.161	0.383	0.546	0.674	0.33	0.47	0.492	0.095	0.147	0.158	0.137	0.167	0.139	0.147
140.5	0.127	0.117	0.161	0.143	0.161	0.897	0.937	1.024	1.125	0.837	0.942	1.023	1.008	0.086	0.144	0.138	0.142	0.15	0.172	0.155	0.147	0.154		140.5	0.148	0.121	0.151	0.159	0.387	0.545	0.675	0.327	0.47	0.492	0.094	0.145	0.156	0.14	0.165	0.14	0.146
140.75	0.128	0.114	0.163	0.144	0.162	0.898	0.942	1.024	1.127	0.836	0.947	1.025	1.012	0.085	0.143	0.137	0.143	0.151	0.172	0.158	0.147	0.157		140.75	0.15	0.122	0.153	0.164	0.385	0.547	0.676	0.332	0.472	0.493	0.095	0.145	0.158	0.139	0.17	0.142	0.147
141	0.128	0.118	0.164	0.145	0.165	0.902	0.945	1.03	1.129	0.841	0.949	1.028	1.015	0.087	0.145	0.138	0.141	0.152	0.174	0.157	0.144	0.156		141	0.15	0.123	0.153	0.164	0.38	0.546	0.677	0.328	0.472	0.492	0.097	0.146	0.158	0.139	0.17	0.143	0.15
141.25	0.126	0.113	0.164	0.143	0.161	0.901	0.95	1.032	1.129	0.842	0.954	1.031	1.017	0.087	0.143	0.139	0.139	0.151	0.171	0.158	0.146	0.153		141.25	0.15	0.123	0.153	0.163	0.38	0.545	0.68	0.33	0.471	0.494	0.095	0.148	0.159	0.143	0.17	0.14	0.149
141.5	0.126	0.116	0.167	0.144	0.158	0.907	0.952	1.035	1.133	0.842	0.958	1.034	1.019	0.085	0.143	0.138	0.138	0.153	0.172	0.156	0.145	0.155		141.5	0.149	0.122	0.152	0.166	0.379	0.545	0.68	0.33	0.471	0.496	0.095	0.148	0.157	0.142	0.169	0.145	0.15
141.75	0.128	0.119	0.165	0.147	0.157	0.91	0.952	1.038	1.131	0.846	0.959	1.037	1.02	0.089	0.143	0.138	0.136	0.154	0.176	0.157	0.146	0.153		141.75	0.151	0.123	0.153	0.166	0.378	0.545	0.683	0.328	0.469	0.492	0.095	0.145	0.16	0.142	0.172	0.142	0.151
142	0.127	0.115	0.167	0.146	0.156	0.91	0.958	1.04	1.135	0.85	0.963	1.039	1.023	0.087	0.145	0.14	0.137	0.153	0.176	0.157	0.146	0.154		142	0.152	0.123	0.152	0.165	0.381	0.546	0.683	0.33	0.469	0.495	0.096	0.146	0.159	0.145	0.174	0.141	0.154
142.25	0.129	0.114	0.165	0.145	0.155	0.915	0.96	1.045	1.135	0.851	0.966	1.044	1.025	0.087	0.142	0.14	0.136	0.154	0.177	0.156	0.15	0.153		142.25	0.151	0.123	0.153	0.17	0.379	0.55	0.686	0.325	0.471	0.494	0.095	0.148	0.159	0.141	0.17	0.147	0.154
142.5	0.129	0.118	0.166	0.15	0.156	0.918	0.964	1.049	1.137	0.855	0.966	1.05	1.028	0.089	0.144	0.142	0.133	0.156	0.175	0.158	0.15	0.153		142.5	0.148	0.122	0.157	0.168	0.378	0.549	0.687	0.331	0.472	0.495	0.094	0.147	0.159	0.138	0.166	0.144	0.156
142.75	0.129	0.118	0.168	0.149	0.157	0.92	0.968	1.053	1.141	0.856	0.971	1.053	1.029	0.088	0.146	0.144	0.138	0.154	0.175	0.16	0.148	0.154		142.75	0.147	0.121	0.152	0.169	0.378	0.549	0.689	0.333	0.472	0.497	0.093	0.145	0.163	0.138	0.167	0.142	0.155
143	0.13	0.116	0.164	0.152	0.159	0.922	0.964	1.059	1.143	0.855	0.971	1.057	1.034	0.089	0.143	0.144	0.139	0.153	0.176	0.157	0.151	0.156		143	0.148	0.123	0.15	0.169	0.372	0.543	0.689	0.332	0.47	0.496	0.096	0.148	0.161	0.138	0.172	0.14	0.158
143.25	0.128	0.117	0.166	0.151	0.159	0.925	0.971	1.059	1.145	0.858	0.977	1.058	1.037	0.088	0.145	0.143	0.138	0.156	0.174	0.159	0.15	0.156		143.25	0.149	0.121	0.151	0.172	0.37	0.544	0.694	0.33	0.47	0.496	0.096	0.147	0.162	0.139	0.168	0.139	0.159
143.5	0.132	0.116	0.164	0.154	0.161	0.927	0.972	1.064	1.151	0.86	0.977	1.063	1.042	0.087	0.14	0.146	0.139	0.155	0.174	0.159	0.152	0.157		143.5	0.146	0.122	0.153	0.172	0.373	0.544	0.692	0.324	0.469	0.498	0.097	0.145	0.162	0.138	0.167	0.137	0.159
143.75	0.127	0.116	0.165	0.151	0.16	0.93	0.975	1.066	1.151	0.863	0.979	1.065	1.047	0.089	0.143	0.143	0.139	0.155	0.173	0.157	0.152	0.155		143.75	0.147	0.122	0.147	0.167	0.372	0.544	0.694	0.324	0.47	0.497	0.095	0.145	0.162	0.14	0.168	0.14	0.159
144	0.125	0.115	0.162	0.152	0.164	0.932	0.975	1.071	1.159	0.864	0.981	1.068	1.05	0.087	0.142	0.144	0.14	0.157	0.175	0.156	0.152	0.159		144	0.146	0.122	0.15	0.173	0.38	0.544	0.693	0.321	0.469	0.496	0.094	0.144	0.163	0.138	0.168	0.138	0.161
144.25	0.126	0.115	0.161	0.153	0.162	0.935	0.978	1.073	1.162	0.867	0.984	1.072	1.053	0.087	0.141	0.145	0.14	0.154	0.173	0.155	0.15	0.16		144.25	0.148	0.123	0.148	0.172	0.377	0.545	0.697	0.318	0.47	0.496	0.095	0.146	0.162	0.138	0.169	0.137	0.16
144.5	0.13	0.118	0.159	0.152	0.161	0.937	0.981	1.074	1.162	0.867	0.988	1.075	1.055	0.088	0.14	0.144	0.139	0.158	0.174	0.155	0.151	0.156		144.5	0.145	0.122	0.148	0.173	0.374	0.543	0.698	0.316	0.47	0.498	0.093	0.143	0.166	0.137	0.166	0.134	0.159
144.75	0.128	0.117	0.159	0.153	0.161	0.936	0.983	1.078	1.166	0.87	0.991	1.077	1.058	0.087	0.142	0.143	0.137	0.156	0.175	0.157	0.15	0.157		144.75	0.146	0.122	0.147	0.172	0.374	0.544	0.698	0.313	0.471	0.498	0.093	0.143	0.166	0.136	0.165	0.136	0.163
145	0.127	0.116	0.161	0.155	0.161	0.942	0.986	1.081	1.168	0.872	0.991	1.08	1.062	0.089	0.142	0.144	0.141	0.152	0.174	0.155	0.151	0.158		145	0.143	0.123	0.145	0.173	0.37	0.544	0.699	0.302	0.469	0.499	0.093	0.142	0.163	0.137	0.165	0.136	0.159
145.25	0.125	0.118	0.161	0.153	0.163	0.942	0.988	1.087	1.17	0.876	0.993	1.084	1.063	0.088	0.139	0.145	0.141	0.153	0.174	0.154	0.152	0.159		145.25	0.142	0.122	0.146	0.172	0.372	0.545	0.699	0.296	0.468	0.499	0.094	0.143	0.165	0.135	0.163	0.137	0.158
145.5	0.127	0.114	0.158	0.153	0.165	0.936	0.99	1.088	1.172	0.878	0.996	1.086	1.068	0.085	0.141	0.146	0.14	0.152	0.172	0.152	0.151	0.159		145.5	0.14	0.118	0.148	0.173	0.373	0.546	0.705	0.299	0.468	0.496	0.09	0.144	0.166	0.131	0.161	0.136	0.16
145.75	0.122	0.114	0.159	0.153	0.16	0.949	0.993	1.09	1.172	0.879	0.998	1.087	1.068	0.084	0.14	0.142	0.137	0.149	0.17	0.154	0.152	0.156		145.75	0.136	0.12	0.147	0.171	0.371	0.544	0.705	0.298	0.469	0.493	0.091	0.141	0.164	0.128	0.158	0.133	0.159
146	0.119	0.113	0.159	0.153	0.157	0.951	0.996	1.09	1.172	0.88	1.001	1.091	1.068	0.081	0.138	0.143	0.137	0.149	0.17	0.154	0.152	0.154		146	0.139	0.118	0.148	0.167	0.367	0.546	0.702	0.297	0.47	0.495	0.088	0.143	0.163	0.126	0.157	0.132	0.155
146.25	0.117	0.111	0.16	0.151	0.156	0.942	1	1.092	1.176	0.88	1.005	1.093	1.072	0.082	0.143	0.144	0.137	0.148	0.166	0.156	0.15	0.154		146.25	0.132	0.118	0.147	0.167	0.369	0.545	0.702	0.298	0.467	0.496	0.088	0.142	0.163	0.124	0.153	0.136	0.153
146.5	0.118	0.111	0.161	0.149	0.154	0.941	1.003	1.094	1.176	0.883	1.008	1.093	1.073	0.079	0.143	0.14	0.136	0.148	0.167	0.156	0.15	0.152		146.5	0.134	0.118	0.149	0.167	0.368	0.545	0.704	0.291	0.468	0.494	0.087	0.144	0.161	0.122	0.149	0.137	0.152
146.75	0.113	0.111	0.158	0.147	0.154	0.946	1.005	1.095	1.176	0.883	1.009	1.095	1.075	0.078	0.14	0.144	0.135	0.146	0.163	0.155	0.149	0.152		146.75	0.135	0.117	0.147	0.164	0.367	0.544	0.702	0.293	0.469	0.491	0.086	0.143	0.159	0.122	0.15	0.136	0.149
147	0.118	0.111	0.161	0.148	0.153	0.949	1.008	1.099	1.179	0.885	1.012	1.096	1.079	0.079	0.142	0.138	0.133	0.148	0.167	0.157	0.147	0.153		147	0.137	0.117	0.147	0.163	0.373	0.545	0.707	0.288	0.47	0.492	0.086	0.146	0.158	0.127	0.154	0.134	0.15
147.25	0.118	0.112	0.162	0.146	0.155	0.952	1.011	1.099	1.185	0.884	1.014	1.098	1.08	0.081	0.141	0.14	0.136	0.146	0.168	0.155	0.148	0.154		147.25	0.137	0.12	0.149	0.163	0.376	0.545	0.706	0.297	0.469	0.491	0.086	0.144	0.158	0.128	0.155	0.137	0.149
147.5	0.12	0.112	0.161	0.147	0.157	0.952	1.014	1.101	1.187	0.888	1.02	1.102	1.084	0.083	0.141	0.14	0.138	0.149	0.169	0.155	0.148	0.155		147.5	0.138	0.118	0.149	0.162	0.376	0.547	0.707	0.292	0.47	0.491	0.088	0.142	0.161	0.127	0.153	0.138	0.148
147.75	0.119	0.113	0.161	0.146	0.157	0.96	1.017	1.105	1.19	0.893	1.022	1.106	1.087	0.084	0.141	0.14	0.137	0.149	0.168	0.156	0.15	0.155		147.75	0.138	0.118	0.149	0.163	0.375	0.544	0.708	0.295	0.471	0.491	0.088	0.143	0.158	0.129	0.158	0.136	0.148
148	0.121	0.113	0.161	0.148	0.158	0.959	1.02	1.106	1.194	0.893	1.025	1.108	1.093	0.082	0.139	0.14	0.136	0.148	0.168	0.155	0.15	0.154		148	0.141	0.119	0.149	0.164	0.379	0.549	0.712	0.293	0.47	0.491	0.089	0.144	0.161	0.132	0.16	0.137	0.147
148.25	0.122	0.111	0.164	0.146	0.159	0.963	1.026	1.11	1.196	0.896	1.028	1.109	1.098	0.084	0.144	0.138	0.137	0.148	0.172	0.158	0.147	0.155		148.25	0.14	0.118	0.152	0.164	0.377	0.547	0.71	0.296	0.473	0.493	0.091	0.147	0.161	0.133	0.162	0.141	0.149
148.5	0.127	0.116	0.163	0.149	0.159	0.966	1.029	1.114	1.203	0.897	1.032	1.113	1.1	0.083	0.144	0.142	0.139	0.149	0.171	0.159	0.149	0.154		148.5	0.14	0.121	0.149	0.166	0.379	0.551	0.711	0.295	0.473	0.491	0.089	0.147	0.157	0.132	0.161	0.14	0.149
148.75	0.123	0.114	0.162	0.148	0.164	0.968	1.03	1.116	1.208	0.903	1.034	1.115	1.106	0.083	0.143	0.143	0.141	0.15	0.169	0.157	0.147	0.157		148.75	0.14	0.122	0.152	0.165	0.38	0.55	0.714	0.297	0.473	0.491	0.089	0.146	0.16	0.132	0.162	0.141	0.149
149	0.125	0.116	0.164	0.148	0.162	0.966	1.033	1.12	1.206	0.906	1.037	1.119	1.108	0.085	0.144	0.141	0.138	0.149	0.173	0.157	0.148	0.157		149	0.143	0.123	0.153	0.165	0.38	0.549	0.716	0.292	0.474	0.492	0.088	0.146	0.158	0.136	0.163	0.14	0.151
149.25	0.121	0.115	0.165	0.15	0.16	0.967	1.037	1.121	1.21	0.908	1.039	1.125	1.111	0.084	0.143	0.141	0.139	0.149	0.173	0.157	0.148	0.156		149.25	0.142	0.121	0.151	0.164	0.379	0.548	0.716	0.302	0.472	0.492	0.093	0.144	0.16	0.135	0.161	0.141	0.149
149.5	0.124	0.116	0.162	0.149	0.163	0.978	1.038	1.125	1.217	0.904	1.042	1.127	1.117	0.087	0.141	0.143	0.139	0.15	0.173	0.154	0.149	0.161		149.5	0.143	0.123	0.15	0.168	0.379	0.547	0.719	0.305	0.47	0.491	0.092	0.145	0.161	0.135	0.166	0.14	0.149
149.75	0.127	0.117	0.163	0.15	0.162	0.982	1.041	1.127	1.217	0.909	1.044	1.129	1.117	0.087	0.142	0.141	0.14	0.153	0.175	0.157	0.15	0.158		149.75	0.142	0.121	0.154	0.167	0.381	0.549	0.72	0.305	0.472	0.492	0.096	0.142	0.159	0.136	0.163	0.14	0.153
150	0.125	0.118	0.163	0.152	0.159	0.983	1.045	1.133	1.222	0.914	1.048	1.132	1.121	0.088	0.142	0.141	0.139	0.152	0.172	0.156	0.151	0.154		150	0.141	0.12	0.149	0.168	0.378	0.545	0.723	0.3	0.469	0.492	0.094	0.142	0.159	0.138	0.165	0.139	0.152
150.25	0.123	0.113	0.165	0.15	0.16	0.99	1.046	1.135	1.225	0.914	1.052	1.134	1.123	0.086	0.142	0.142	0.137	0.149	0.173	0.156	0.148	0.159		150.25	0.143	0.12	0.149	0.169	0.378	0.547	0.724	0.3	0.47	0.493	0.099	0.147	0.161	0.134	0.161	0.137	0.153
150.5	0.124	0.116	0.163	0.151	0.159	0.993	1.053	1.137	1.227	0.916	1.053	1.138	1.127	0.087	0.143	0.143	0.137	0.151	0.173	0.155	0.151	0.158		150.5	0.143	0.121	0.149	0.17	0.378	0.545	0.725	0.3	0.473	0.493	0.097	0.146	0.162	0.137	0.163	0.139	0.156
150.75	0.123	0.116	0.164	0.15	0.158	0.996	1.054	1.139	1.227	0.919	1.055	1.14	1.129	0.087	0.143	0.14	0.138	0.152	0.173	0.157	0.15	0.154		150.75	0.143	0.121	0.152	0.17	0.379	0.546	0.726	0.299	0.47	0.492	0.095	0.144	0.162	0.135	0.16	0.136	0.151
151	0.121	0.116	0.161	0.15	0.157	0.999	1.056	1.143	1.227	0.92	1.058	1.144	1.13	0.087	0.142	0.14	0.136	0.149	0.173	0.155	0.15	0.154		151	0.144	0.121	0.153	0.169	0.381	0.546	0.726	0.297	0.473	0.492	0.096	0.146	0.162	0.136	0.162	0.139	0.153
151.25	0.122	0.119	0.165	0.149	0.157	0.993	1.059	1.145	1.23	0.922	1.062	1.147	1.13	0.086	0.143	0.143	0.135	0.15	0.171	0.159	0.148	0.153		151.25	0.143	0.121	0.149	0.17	0.38	0.547	0.73	0.298	0.472	0.492	0.096	0.144	0.165	0.137	0.162	0.14	0.156
151.5	0.122	0.115	0.159	0.151	0.156	1.005	1.061	1.147	1.232	0.925	1.063	1.151	1.132	0.087	0.143	0.144	0.134	0.15	0.172	0.155	0.151	0.153		151.5	0.143	0.123	0.152	0.168	0.381	0.547	0.732	0.291	0.471	0.492	0.095	0.143	0.163	0.136	0.163	0.138	0.154
151.75	0.123	0.117	0.159	0.15	0.156	1.006	1.063	1.153	1.234	0.927	1.065	1.153	1.138	0.086	0.141	0.143	0.136	0.151	0.173	0.156	0.152	0.154		151.75	0.144	0.12	0.151	0.168	0.379	0.545	0.733	0.3	0.473	0.494	0.095	0.144	0.163	0.136	0.164	0.137	0.154
152	0.122	0.115	0.16	0.15	0.155	1.006	1.066	1.155	1.237	0.928	1.07	1.157	1.14	0.087	0.142	0.142	0.136	0.15	0.172	0.156	0.149	0.155		152	0.142	0.12	0.15	0.17	0.379	0.549	0.736	0.301	0.472	0.492	0.092	0.143	0.162	0.133	0.164	0.136	0.154
152.25	0.124	0.116	0.162	0.15	0.157	1.005	1.068	1.157	1.239	0.935	1.072	1.159	1.144	0.088	0.142	0.141	0.133	0.151	0.171	0.156	0.152	0.155		152.25	0.141	0.12	0.15	0.171	0.378	0.546	0.735	0.299	0.474	0.494	0.092	0.143	0.165	0.137	0.162	0.136	0.153
152.5	0.128	0.115	0.16	0.151	0.157	1.011	1.071	1.162	1.242	0.935	1.073	1.163	1.144	0.087	0.141	0.143	0.135	0.15	0.174	0.155	0.152	0.156		152.5	0.141	0.12	0.149	0.168	0.38	0.547	0.737	0.301	0.479	0.493	0.093	0.142	0.162	0.136	0.161	0.135	0.155
152.75	0.123	0.115	0.161	0.153	0.157	1.011	1.074	1.164	1.244	0.936	1.079	1.165	1.147	0.087	0.142	0.143	0.135	0.149	0.171	0.154	0.149	0.156		152.75	0.141	0.119	0.151	0.17	0.381	0.548	0.741	0.302	0.477	0.495	0.092	0.143	0.163	0.138	0.16	0.138	0.156
153	0.121	0.115	0.161	0.153	0.158	1.017	1.078	1.168	1.247	0.938	1.08	1.17	1.151	0.086	0.143	0.141	0.135	0.15	0.172	0.155	0.149	0.155		153	0.14	0.12	0.15	0.167	0.382	0.549	0.741	0.304	0.479	0.495	0.095	0.145	0.164	0.135	0.161	0.137	0.153
153.25	0.126	0.115	0.161	0.152	0.157	1.018	1.078	1.172	1.247	0.942	1.082	1.172	1.151	0.09	0.139	0.145	0.133	0.152	0.171	0.155	0.15	0.154		153.25	0.14	0.118	0.148	0.17	0.38	0.549	0.743	0.296	0.477	0.493	0.093	0.143	0.163	0.134	0.158	0.137	0.158
153.5	0.125	0.114	0.163	0.152	0.158	1.021	1.083	1.174	1.25	0.943	1.086	1.174	1.153	0.09	0.141	0.143	0.136	0.148	0.171	0.157	0.152	0.155		153.5	0.141	0.119	0.151	0.169	0.378	0.549	0.745	0.295	0.48	0.493	0.093	0.143	0.162	0.132	0.158	0.138	0.152
153.75	0.123	0.114	0.161	0.151	0.16	1.018	1.087	1.176	1.255	0.945	1.089	1.176	1.157	0.088	0.144	0.146	0.136	0.15	0.172	0.155	0.149	0.153		153.75	0.136	0.118	0.15	0.169	0.378	0.547	0.745	0.29	0.48	0.494	0.09	0.142	0.162	0.131	0.155	0.137	0.153
154	0.122	0.115	0.163	0.153	0.163	1.023	1.09	1.181	1.257	0.949	1.093	1.18	1.161	0.089	0.143	0.144	0.139	0.15	0.171	0.158	0.15	0.159		154	0.136	0.117	0.151	0.17	0.379	0.547	0.746	0.29	0.479	0.494	0.089	0.144	0.161	0.128	0.156	0.136	0.154
154.25	0.122	0.113	0.163	0.152	0.161	1.024	1.094	1.185	1.257	0.947	1.096	1.183	1.161	0.086	0.143	0.142	0.137	0.146	0.171	0.158	0.15	0.157		154.25	0.139	0.118	0.15	0.168	0.38	0.549	0.749	0.291	0.48	0.491	0.091	0.145	0.164	0.131	0.154	0.139	0.152
154.5	0.121	0.119	0.161	0.15	0.164	1.03	1.095	1.187	1.263	0.943	1.098	1.187	1.165	0.086	0.142	0.142	0.138	0.149	0.172	0.155	0.152	0.157		154.5	0.138	0.118	0.149	0.169	0.382	0.549	0.75	0.293	0.481	0.494	0.091	0.145	0.162	0.132	0.158	0.139	0.151
154.75	0.118	0.117	0.161	0.149	0.163	1.033	1.095	1.19	1.263	0.951	1.102	1.189	1.167	0.085	0.143	0.141	0.137	0.149	0.172	0.155	0.15	0.158		154.75	0.138	0.117	0.149	0.167	0.382	0.55	0.751	0.291	0.483	0.494	0.09	0.144	0.161	0.131	0.156	0.139	0.153
155	0.12	0.115	0.162	0.151	0.161	1.033	1.099	1.192	1.265	0.95	1.104	1.192	1.167	0.087	0.142	0.141	0.139	0.149	0.172	0.155	0.15	0.155		155	0.138	0.119	0.151	0.171	0.379	0.551	0.754	0.289	0.481	0.496	0.091	0.145	0.162	0.133	0.158	0.138	0.153
155.25	0.117	0.112	0.162	0.148	0.163	1.032	1.103	1.194	1.265	0.95	1.108	1.194	1.17	0.086	0.142	0.142	0.138	0.146	0.172	0.155	0.15	0.158		155.25	0.139	0.118	0.152	0.169	0.379	0.55	0.754	0.291	0.481	0.494	0.091	0.144	0.161	0.131	0.159	0.136	0.153
155.5	0.121	0.115	0.163	0.149	0.16	1.041	1.105	1.199	1.268	0.951	1.109	1.198	1.172	0.087	0.14	0.141	0.14	0.146	0.169	0.157	0.149	0.159		155.5	0.139	0.119	0.151	0.166	0.373	0.552	0.756	0.29	0.481	0.493	0.09	0.145	0.158	0.133	0.158	0.137	0.151
155.75	0.123	0.115	0.162	0.149	0.166	1.046	1.108	1.201	1.271	0.952	1.113	1.198	1.174	0.089	0.141	0.141	0.141	0.15	0.173	0.158	0.15	0.157		155.75	0.14	0.12	0.15	0.166	0.372	0.551	0.758	0.29	0.481	0.494	0.093	0.144	0.161	0.136	0.16	0.138	0.149
156	0.122	0.115	0.163	0.148	0.163	1.049	1.112	1.201	1.271	0.952	1.115	1.201	1.174	0.088	0.142	0.141	0.139	0.15	0.171	0.155	0.151	0.157		156	0.139	0.119	0.153	0.169	0.37	0.554	0.759	0.291	0.484	0.495	0.092	0.146	0.159	0.134	0.161	0.14	0.148
156.25	0.121	0.115	0.163	0.15	0.164	1.041	1.112	1.206	1.273	0.956	1.117	1.205	1.176	0.086	0.14	0.142	0.138	0.148	0.17	0.154	0.151	0.157		156.25	0.139	0.12	0.153	0.166	0.37	0.552	0.761	0.289	0.483	0.493	0.092	0.145	0.159	0.135	0.161	0.139	0.149
156.5	0.12	0.114	0.162	0.149	0.164	1.053	1.114	1.206	1.273	0.959	1.121	1.205	1.178	0.087	0.141	0.144	0.14	0.149	0.172	0.155	0.15	0.156		156.5	0.141	0.12	0.151	0.166	0.37	0.553	0.762	0.292	0.484	0.494	0.091	0.144	0.159	0.134	0.16	0.139	0.149
156.75	0.123	0.114	0.166	0.148	0.163	1.051	1.12	1.208	1.276	0.956	1.125	1.208	1.178	0.089	0.144	0.142	0.138	0.15	0.169	0.157	0.147	0.16		156.75	0.14	0.121	0.152	0.169	0.367	0.556	0.764	0.288	0.484	0.494	0.091	0.146	0.158	0.134	0.158	0.14	0.151
157	0.123	0.114	0.163	0.149	0.163	1.056	1.121	1.213	1.276	0.951	1.127	1.21	1.18	0.088	0.141	0.141	0.139	0.148	0.17	0.154	0.151	0.158		157	0.142	0.119	0.152	0.168	0.368	0.556	0.767	0.289	0.483	0.494	0.09	0.145	0.159	0.132	0.157	0.138	0.15
157.25	0.12	0.113	0.167	0.15	0.16	1.054	1.123	1.215	1.282	0.951	1.13	1.215	1.18	0.086	0.142	0.14	0.137	0.148	0.17	0.156	0.149	0.157		157.25	0.14	0.119	0.152	0.167	0.369	0.561	0.768	0.292	0.487	0.495	0.089	0.146	0.159	0.133	0.158	0.142	0.153
157.5	0.119	0.113	0.165	0.15	0.162	1.056	1.129	1.215	1.282	0.95	1.132	1.215	1.183	0.085	0.146	0.143	0.137	0.148	0.17	0.155	0.149	0.159		157.5	0.139	0.118	0.152	0.171	0.371	0.561	0.772	0.293	0.484	0.498	0.09	0.143	0.158	0.131	0.158	0.138	0.152
157.75	0.122	0.113	0.162	0.149	0.161	1.061	1.129	1.217	1.282	0.96	1.134	1.215	1.185	0.087	0.142	0.141	0.14	0.149	0.17	0.156	0.148	0.158		157.75	0.14	0.12	0.152	0.171	0.37	0.559	0.775	0.294	0.484	0.496	0.09	0.148	0.16	0.132	0.156	0.139	0.157
158	0.12	0.112	0.164	0.152	0.162	1.069	1.133	1.22	1.282	0.962	1.136	1.22	1.183	0.086	0.144	0.145	0.138	0.147	0.169	0.157	0.151	0.155		158	0.139	0.118	0.154	0.17	0.366	0.56	0.776	0.294	0.485	0.497	0.09	0.146	0.161	0.13	0.157	0.14	0.152
158.25	0.118	0.115	0.164	0.151	0.158	1.066	1.133	1.225	1.284	0.96	1.14	1.224	1.185	0.086	0.144	0.143	0.135	0.147	0.172	0.157	0.153	0.157		158.25	0.138	0.118	0.153	0.175	0.365	0.56	0.779	0.295	0.484	0.499	0.091	0.146	0.163	0.132	0.156	0.138	0.158
158.5	0.118	0.111	0.165	0.151	0.158	1.064	1.139	1.227	1.293	0.966	1.144	1.227	1.187	0.086	0.144	0.144	0.137	0.149	0.172	0.16	0.151	0.156		158.5	0.138	0.121	0.154	0.172	0.368	0.56	0.781	0.299	0.484	0.499	0.09	0.147	0.162	0.131	0.156	0.137	0.156
158.75	0.12	0.114	0.162	0.152	0.158	1.071	1.141	1.227	1.293	0.968	1.147	1.227	1.187	0.085	0.141	0.144	0.136	0.148	0.169	0.156	0.153	0.155		158.75	0.14	0.119	0.152	0.176	0.368	0.559	0.784	0.3	0.487	0.501	0.091	0.144	0.163	0.135	0.159	0.137	0.157
159	0.123	0.113	0.164	0.154	0.156	1.074	1.143	1.234	1.296	0.968	1.149	1.229	1.187	0.086	0.144	0.143	0.136	0.147	0.17	0.156	0.152	0.154		159	0.14	0.12	0.152	0.175	0.37	0.558	0.787	0.302	0.485	0.5	0.089	0.145	0.162	0.131	0.16	0.14	0.158
159.25	0.121	0.115	0.162	0.154	0.158	1.08	1.145	1.234	1.296	0.972	1.151	1.234	1.189	0.086	0.142	0.145	0.135	0.151	0.173	0.154	0.152	0.152		159.25	0.139	0.122	0.154	0.173	0.368	0.562	0.786	0.302	0.487	0.501	0.09	0.146	0.163	0.134	0.16	0.139	0.157
159.5	0.122	0.112	0.163	0.154	0.157	1.083	1.149	1.234	1.299	0.978	1.153	1.234	1.192	0.087	0.143	0.146	0.136	0.148	0.173	0.157	0.152	0.157		159.5	0.14	0.122	0.154	0.174	0.368	0.563	0.789	0.301	0.485	0.502	0.092	0.147	0.161	0.133	0.158	0.14	0.157
159.75	0.122	0.116	0.163	0.153	0.16	1.087	1.149	1.237	1.301	0.975	1.157	1.237	1.194	0.086	0.144	0.146	0.136	0.15	0.172	0.156	0.153	0.154		159.75	0.14	0.12	0.153	0.175	0.367	0.562	0.794	0.297	0.489	0.498	0.092	0.147	0.163	0.133	0.163	0.14	0.156
160	0.122	0.115	0.162	0.153	0.159	1.085	1.153	1.239	1.301	0.982	1.159	1.239	1.196	0.088	0.143	0.144	0.137	0.149	0.172	0.157	0.151	0.156		160	0.141	0.12	0.151	0.174	0.366	0.564	0.793	0.295	0.487	0.498	0.091	0.147	0.163	0.139	0.161	0.138	0.154
160.25	0.124	0.116	0.163	0.151	0.162	1.103	1.157	1.239	1.307	0.978	1.161	1.237	1.201	0.087	0.143	0.144	0.139	0.152	0.174	0.158	0.152	0.156		160.25	0.142	0.121	0.151	0.173	0.366	0.564	0.795	0.295	0.489	0.499	0.093	0.146	0.163	0.14	0.165	0.14	0.157
160.5	0.128	0.117	0.164	0.152	0.159	1.095	1.159	1.239	1.307	0.982	1.163	1.239	1.201	0.09	0.141	0.146	0.137	0.152	0.177	0.158	0.152	0.157		160.5	0.141	0.118	0.154	0.176	0.365	0.564	0.797	0.289	0.487	0.498	0.092	0.148	0.163	0.136	0.16	0.14	0.155
160.75	0.126	0.118	0.165	0.152	0.161	1.106	1.162	1.239	1.31	0.982	1.167	1.239	1.203	0.09	0.143	0.146	0.135	0.152	0.176	0.157	0.161	0.155		160.75	0.14	0.122	0.153	0.171	0.367	0.566	0.798	0.29	0.49	0.5	0.091	0.146	0.161	0.135	0.159	0.142	0.155
161	0.125	0.116	0.163	0.153	0.162	1.11	1.164	1.244	1.316	0.979	1.172	1.242	1.208	0.087	0.143	0.143	0.138	0.149	0.173	0.159	0.162	0.156		161	0.141	0.121	0.153	0.172	0.369	0.567	0.799	0.286	0.488	0.5	0.091	0.144	0.161	0.137	0.16	0.139	0.155
161.25	0.123	0.116	0.161	0.153	0.161	1.108	1.166	1.247	1.316	0.982	1.172	1.242	1.208	0.087	0.142	0.144	0.139	0.149	0.174	0.156	0.162	0.159		161.25	0.14	0.12	0.151	0.171	0.365	0.567	0.803	0.286	0.488	0.499	0.091	0.147	0.161	0.135	0.161	0.139	0.154
161.5	0.125	0.115	0.164	0.151	0.159	1.11	1.17	1.244	1.313	0.988	1.176	1.244	1.21	0.087	0.142	0.143	0.137	0.151	0.171	0.156	0.162	0.155		161.5	0.139	0.12	0.15	0.172	0.366	0.565	0.805	0.29	0.489	0.501	0.091	0.145	0.161	0.134	0.159	0.139	0.153
161.75	0.122	0.116	0.165	0.152	0.16	1.103	1.172	1.247	1.316	0.991	1.178	1.247	1.21	0.086	0.14	0.143	0.137	0.15	0.172	0.157	0.161	0.156		161.75	0.139	0.119	0.149	0.174	0.362	0.565	0.807	0.289	0.488	0.499	0.09	0.146	0.161	0.134	0.155	0.138	0.153
162	0.121	0.113	0.163	0.151	0.161	1.097	1.174	1.247	1.319	0.992	1.18	1.247	1.212	0.085	0.142	0.143	0.137	0.149	0.17	0.155	0.159	0.156		162	0.137	0.117	0.151	0.171	0.365	0.565	0.808	0.287	0.491	0.499	0.092	0.146	0.16	0.13	0.156	0.137	0.151
162.25	0.12	0.113	0.162	0.15	0.161	1.103	1.176	1.247	1.322	0.992	1.18	1.247	1.215	0.082	0.141	0.143	0.137	0.147	0.169	0.156	0.159	0.157		162.25	0.136	0.118	0.153	0.17	0.364	0.566	0.81	0.288	0.49	0.497	0.088	0.146	0.16	0.129	0.151	0.136	0.152
162.5	0.117	0.114	0.164	0.151	0.161	1.105	1.181	1.247	1.325	0.991	1.183	1.25	1.215	0.083	0.141	0.143	0.137	0.146	0.169	0.156	0.161	0.158		162.5	0.134	0.116	0.15	0.173	0.366	0.567	0.814	0.288	0.489	0.499	0.086	0.144	0.161	0.127	0.147	0.14	0.153
162.75	0.117	0.11	0.162	0.151	0.162	1.105	1.183	1.25	1.328	0.992	1.187	1.25	1.22	0.082	0.141	0.143	0.139	0.146	0.167	0.156	0.16	0.155		162.75	0.135	0.116	0.154	0.178	0.361	0.567	0.814	0.288	0.49	0.501	0.086	0.145	0.159	0.123	0.147	0.138	0.151
163	0.115	0.109	0.163	0.156	0.162	1.11	1.185	1.252	1.328	0.988	1.192	1.255	1.222	0.081	0.143	0.142	0.139	0.146	0.166	0.159	0.16	0.157		163	0.133	0.116	0.154	0.177	0.365	0.567	0.817	0.289	0.492	0.5	0.086	0.143	0.159	0.123	0.148	0.138	0.15
163.25	0.115	0.109	0.161	0.157	0.161	1.112	1.185	1.255	1.331	0.995	1.189	1.257	1.222	0.079	0.142	0.142	0.14	0.141	0.164	0.155	0.16	0.155		163.25	0.133	0.117	0.154	0.178	0.362	0.567	0.82	0.287	0.492	0.5	0.087	0.145	0.161	0.124	0.149	0.139	0.152
163.5	0.117	0.11	0.162	0.159	0.164	1.116	1.192	1.255	1.331	0.988	1.194	1.257	1.224	0.08	0.141	0.143	0.137	0.148	0.166	0.156	0.159	0.158		163.5	0.135	0.119	0.154	0.18	0.364	0.568	0.823	0.291	0.492	0.5	0.088	0.144	0.161	0.126	0.15	0.138	0.154
163.75	0.117	0.109	0.165	0.158	0.161	1.12	1.192	1.257	1.334	0.996	1.198	1.26	1.224	0.081	0.144	0.141	0.137	0.144	0.168	0.157	0.161	0.155		163.75	0.133	0.115	0.155	0.178	0.364	0.568	0.825	0.289	0.492	0.502	0.088	0.146	0.162	0.126	0.15	0.139	0.154
164	0.118	0.112	0.163	0.155	0.162	1.123	1.199	1.257	1.338	0.998	1.201	1.26	1.229	0.081	0.141	0.141	0.138	0.143	0.168	0.156	0.161	0.157		164	0.136	0.118	0.157	0.18	0.368	0.57	0.826	0.293	0.491	0.503	0.09	0.146	0.162	0.129	0.151	0.138	0.154
164.25	0.121	0.111	0.162	0.158	0.161	1.127	1.196	1.26	1.341	1.004	1.203	1.263	1.232	0.084	0.142	0.142	0.138	0.144	0.169	0.156	0.162	0.155		164.25	0.137	0.119	0.156	0.181	0.371	0.569	0.83	0.292	0.494	0.502	0.088	0.147	0.163	0.131	0.153	0.14	0.154
164.5			0.164	0.159	0.162		1.201	1.26	1.341	0.622	1.203	1.265	1.234		0.145	0.143	0.138			0.159	0.161	0.157		164.5			0.154	0.18		0.571	0.83		0.495	0.5		0.148	0.162			0.143	0.153
164.75			0.163	0.158	0.16		1.203	1.263	1.344	0.624	1.208	1.268	1.232		0.141	0.143	0.139			0.159	0.163	0.157		164.75			0.156	0.179		0.572	0.833		0.493	0.503		0.148	0.16			0.142	0.155
165			0.165	0.158	0.163		1.206	1.263	1.344	0.624	1.21	1.265	1.237		0.143	0.143	0.137			0.157	0.161	0.155		165			0.157	0.181		0.572	0.835		0.495	0.502		0.146	0.16			0.147	0.153
165.25			0.167	0.159			1.21	1.265		0.627	1.215	1.265			0.145	0.145				0.159	0.16			165.25			0.154	0.181		0.573	0.844		0.496	0.503		0.148	0.161			0.142	0.155
165.5			0.166	0.158			1.21	1.271		0.629	1.215	1.268			0.142	0.145				0.157	0.162			165.5			0.158	0.18		0.573	0.846		0.496	0.503		0.149	0.16			0.14	0.155
165.75			0.166	0.16			1.21	1.268		0.634	1.22	1.271			0.143	0.144				0.159	0.162			165.75			0.158	0.179		0.573	0.848		0.495	0.503		0.146	0.16			0.142	0.153
166			0.167	0.16			1.215	1.271		0.635	1.222	1.271			0.145	0.142				0.158	0.162			166			0.158	0.18		0.574	0.851		0.496	0.504		0.148	0.159			0.144	0.151
166.25			0.163	0.16			1.217	1.273		0.638	1.222	1.273			0.143	0.143				0.158	0.165						0.158	0.18		0.574	0.853		0.497	0.505		0.148	0.162			0.144	0.154
166.5			0.166	0.16			1.217	1.276		0.641	1.224	1.276			0.144	0.145				0.156	0.163						0.159	0.178		0.574	0.854		0.498	0.502		0.146	0.161			0.145	0.156
166.75			0.164	0.157			1.22	1.273		0.642	1.227	1.276			0.142	0.143				0.158	0.161						0.156	0.18		0.576	0.858		0.499	0.504		0.149	0.163			0.142	0.155
167			0.167	0.159			1.222	1.279		0.645	1.234	1.282			0.144	0.144				0.158	0.162							0.181			0.861			0.503			0.161				0.154
167.25				0.16				1.282		0.647		1.285				0.145					0.162
167.5

## Sheet: Fig_6A
	under LL50
genotype	LT								rpaB_T183P										LT	rpaB_T183P
replicate #	1	2	3	4	5	6	7	8	1	2	3	4	5	6	7	8		Av	1.60675	1.64175
final OD730nm	1.634	1.611	1.642	1.681	1.594	1.579	1.52	1.593	1.538	1.55	1.657	1.533	1.682	1.761	1.667	1.746		SD	0.0480528	0.0914858
																		t-test p-value		0.359437
	under HL700
genotype	LT								rpaB_T183P										LT	rpaB_T183P
replicate #	1	2	3	4	5	6	7	8	1	2	3	4	5	6	7	8		Av	1.77713	4.18863
final OD730nm	2.3	2.273	1.908	1.841	1.436	1.445	1.48	1.534	3.584	3.58	3.822	3.653	4.426	4.545	4.926	4.973		SD	0.361458	0.597569
																		t-test p-value		6.4633e-07
	under FL+
genotype	LT								rpaB_T183P										LT	rpaB_T183P
replicate #	1	2	3	4	5	6	7	8	1	2	3	4	5	6	7	8		Av	0.1815	1.28875
final OD730nm	0.196	0.194	0.188	0.191	0.169	0.163	0.173	0.178	1.425	1.449	1.294	1.275	1.208	1.212	1.209	1.238		SD	0.0124327	0.0969591
																		t-test p-value		4.64859e-09

## Sheet: Fig_6B_blots
Rep1												Rep1													Rep2												Rep2												Rep2
under LL50						under HL700						under LL50						under HL700							under LL50						under HL700						under LL50						under HL700						under LL50
RpaB												PsaA													RpaB												PsaA												AtpB
overlay signal												overlay signal													overlay signal												overlay signal												overlay signal
EF-G2 (re-blotting after RpaB)												PsbA (re-blotting after PsaA)													PsbA (re-blotting after RpaB)						AtpB (re-blotting after RpaB)
AtpB (re-blotting after EF-G2)												CBB signal													CBB signal												CBB signal
CBB signal												APC+PC (fluo)													APC+PC (fluo)												APC+PC (fluo)
APC+PC (fluo)

## Sheet: Fig_6C
Signal quantification LL50																				Signal quantification HL700
		Transposed																				Transposed
		RpaB		PsbA		PsaA		AtpB		APC+PC												RpaB		PsbA		PsaA		AtpB		APC+PC
		LT	rpaB_T183P	LT	rpaB_T183P	LT	rpaB_T183P	LT	rpaB_T183P	LT	rpaB_T183P											LT	rpaB_T183P	LT	rpaB_T183P	LT	rpaB_T183P	LT	rpaB_T183P	LT	rpaB_T183P
		8489.45	18321.8	13213.9	11113.1	15359.9	16736.3	16455.7	15627.9	26516	23664.8											11925.5	16475.6	18775.3	13152.6	16432.2	17728.9	14172.3	16021.7	23031.4	14980.3
		12379.1	12508.7	12947.8	12204.4	18685.3	15396.7	14395.7	14536.6	30329.8	22109.3											9569.52	15380.4	14164.1	10626.1	9702.91	17234.3	10889.6	12984.5	16471	13931.3
		11356.1	15310.4	10982.4	11560.9	16637.9	15042.4	15068.7	11392.1	26954.3	21514.5											13317.7	16593.9	15984.3	11780.6	16152.9	17828.4	13040.2	15454.3	18642.4	21581.8
		10115	11093.6	9976.91	13959.7	13912.6	16739.2		14747.7	24374.1	19481.3											14474.3	13579.7	13654.8	14130.8	10950.2	15214.5	13104.6	16711.4	28781.4	16715.3
		10218.3	14480.8	14786.1	17330.2	13536.3	16610.2	14261.6	15393.6	24372.1	24453.5											13288	14787.9	18775.3	14153.9	16012.9	14866.5	17481.5	16052.2	16552.8	11856.8
		12029.3	14013.9	15138.6	15542.2	17296.2	16950.4	16315.6	16642.7	30048.5	22739.2											15163	14858.7	14164.1	11861.9	16202.4	13420.7	15594.2	14130.4	11866.5	10996.2
		10578.7	16513.6	13448.8	15151	12721	16931.2	15140.1	16055.9	27194.6	21386.8											11942.7	15711.8	15984.3	11626.6	14712.8	13567.7	16989.5	13467.9	14580.6	16872.3
		9121.45	12990.4	13117.7	17659.1	17000.6	18195.9	15573.9	14657.1	25412.9	19270.6											12391.4	17249.1	13654.8	11515	8035.91	15411.7	14264.7	12808.8	25385.3	13058.8
										24017.6	23051.9																			17986.1	12290.8
										25809.3	20275.9																			18159.3	12687.8
										28155.9	19445.3																			16447	23244.3
										26494.6	16699.1																			26015.8	24965.6
										24380.8	21054.2																			16611.5	11595.3
										25007.7	18746.2																			19162.5	12367.9
										27616.6	17899.6																			15980.1	21797.3
										24074.3	16245.9																			24905.3	25204.2
										21594.6	19742.1																			19454.2	12672.8
										23864.5	18740.6																			21810.6	12988
										22867.2	17936.5																			17597.3	23307.7
										22235.8	15998.8																			26548.9	24967
t test p value:																				t test p value:
*** p≤0.001	Average	10535.9	14404.1	12951.5	14315.1	15643.7	16575.3	15315.9	14881.7	25566.1	20022.8									*** p≤0.001	Average	12759	15579.6	15644.6	12355.9	13525.3	15659.1	14442.1	14703.9	19799.5	16904.1
** p≤0.01	SD	1263.37	2160.1	1628.6	2369.02	1964.42	914.228	794.201	1485.93	2306	2386.7									** p≤0.01	SD	1619.51	1108.04	2004.25	1215.73	3191.67	1648.57	2047.34	1438.41	4455.91	5170.68
* p≤0.05	% to LT		1.36714		1.10528		1.05955		0.971649		0.783179									* p≤0.05	% to LT		1.22107		0.789786		1.15777		1.01813		0.853763
insignificant	p (t test)		0.001104		0.230063		0.274422		0.530909		1.02914e-08									insignificant	p (t test)		0.00193909		0.00232211		0.138367		0.785941		0.0722481
	Median																				Median
	Q1																				Q1
	Q3																				Q3
	1.5×IQR																				1.5×IQR
	All replicates																				All replicates
		RpaB			PsbA			PsaA			AtpB			APC+PC (fluo)								RpaB			PsbA			PsaA			AtpB			APC+PC (fluo)
	#	1	2		1	2		1	2		1	2		1	2	3	4	5			#	1	2		1	2		1	2		1	2		1	2	3	4	5
	LT_A	8489.45	10218.3		13213.9	14786.1		15359.9	13536.3		16455.7	14261.6		26516	24372.1	24017.6	24380.8	21594.6			LT_A	11925.5	13288		18775.3	16943.4		16432.2	16012.9		14172.3	17481.5		23031.4	16552.8	17986.1	16611.5	19454.2
	LT_B	12379.1	12029.3		12947.8	15138.6		18685.3	17296.2		14395.7	16315.6		30329.8	30048.5	25809.3	25007.7	23864.5			LT_B	9569.52	15163		14164.1	14861.3		9702.91	16202.4		10889.6	15594.2		16471	11866.5	18159.3	19162.5	21810.6
	LT_C	11356.1	10578.7		10982.4	13448.8		16637.9	12721		15068.7	15140.1		26954.3	27194.6	28155.9	27616.6	22867.2			LT_C	13317.7	11942.7		15984.3	16277.2		16152.9	14712.8		13040.2	16989.5		18642.4	14580.6	16447	15980.1	17597.3
	LT_D	10115	9121.45		9976.91	13117.7		13912.6	17000.6		9229.83	15573.9		24374.1	25412.9	26494.6	24074.3	22235.8			LT_D	14474.3	12391.4		13654.8	12465.3		10950.2	8035.91		13104.6	14264.7		28781.4	25385.3	26015.8	24905.3	26548.9
	rpaB_T183P_A	18321.8	14480.8		11113.1	17330.2		16736.3	16610.2		15627.9	15393.6		23664.8	24453.5	23051.9	21054.2	19742.1			rpaB_T183P_A	16475.6	14787.9		13152.6	14153.9		17728.9	14866.5		16021.7	16052.2		14980.3	11856.8	12290.8	11595.3	12672.8
	rpaB_T183P_B	12508.7	14013.9		12204.4	15542.2		15396.7	16950.4		14536.6	16642.7		22109.3	22739.2	20275.9	18746.2	18740.6			rpaB_T183P_B	15380.4	14858.7		10626.1	11861.9		17234.3	13420.7		12984.5	14130.4		13931.3	10996.2	12687.8	12367.9	12988
	rpaB_T183P_C	15310.4	16513.6		11560.9	15151		15042.4	16931.2		11392.1	16055.9		21514.5	21386.8	19445.3	17899.6	17936.5			rpaB_T183P_C	16593.9	15711.8		11780.6	11626.6		17828.4	13567.7		15454.3	13467.9		21581.8	16872.3	23244.3	21797.3	23307.7
	rpaB_T183P_D	11093.6	12990.4		13959.7	17659.1		16739.2	18195.9		14747.7	14657.1		19481.3	19270.6	16699.1	16245.9	15998.8			rpaB_T183P_D	13579.7	17249.1		14130.8	11515		15214.5	15411.7		16711.4	12808.8		16715.3	13058.8	24965.6	25204.2	24967
		Ratio	Ratio	Average	Ratio	Ratio	Average	Ratio	Ratio	Average	Ratio	Ratio	Average	Ratio	Ratio	Ratio	Ratio	Ratio	Average			Ratio	Ratio	Average	Ratio	Ratio	Average	Ratio	Ratio	Average	Ratio	Ratio	Average	Ratio	Ratio	Ratio	Ratio	Ratio	Average
		1.00005	1.00003	1.00004	0.999993	1.00001	1	0.999994	1.00002	1.00001	0.999982	0.999973	0.999978	1	1	0.999983	0.999993	0.999983	0.999992			1.00004	0.999999	1.00002	1.00002	1.00002	1.00002	1.00001	0.999991	1	1.00002	0.999972	0.999996	1.00002	0.999986	1.00001	0.999972	1.00001	0.999998
		1.45825	1.17727	1.31776	0.979852	1.02385	1.00185	1.21649	1.27779	1.24714	0.874802	1.14399	1.0094	1.14383	1.23291	1.07458	1.0257	1.10509	1.11642			0.802475	1.1411	0.971789	0.754412	0.877137	0.815774	0.590489	1.01183	0.80116	0.768391	0.892013	0.830202	0.715167	0.71688	1.00964	1.15353	1.12114	0.943271
		1.33774	1.0353	1.18652	0.831118	0.909564	0.870341	1.08319	0.939793	1.01149	0.915698	1.06157	0.988634	1.01653	1.11581	1.17228	1.13271	1.05891	1.09925			1.11679	0.898758	1.00777	0.85136	0.960705	0.906032	0.983012	0.918804	0.950908	0.92014	0.971829	0.945985	0.809449	0.880843	0.914434	0.961963	0.904559	0.894249
		1.19154	0.892684	1.04211	0.755026	0.88717	0.821098	0.905771	1.25595	1.08086		1.09199	1.09199	0.919221	1.04271	1.10311	0.98742	1.02967	1.01643			1.21378	0.932525	1.07315	0.727288	0.735723	0.731505	0.666395	0.501837	0.584116	0.924685	0.815967	0.870326	1.24968	1.53358	1.44645	1.49924	1.3647	1.41873
		2.15829	1.41719	1.78774	0.841006	1.17207	1.00654	1.0896	1.22711	1.15836	0.949678	1.07934	1.01451	0.892471	1.00334	0.959775	0.863548	0.914196	0.926667			1.38161	1.11287	1.24724	0.700536	0.835381	0.767959	1.07893	0.928403	1.00367	1.13052	0.918214	1.02437	0.650441	0.716291	0.683352	0.69801	0.651422	0.679903
		1.47352	1.37149	1.4225	0.923594	1.05114	0.98737	1.00239	1.25225	1.12732	0.88336	1.16693	1.02514	0.833812	0.933004	0.844195	0.768885	0.867823	0.849544			1.28976	1.1182	1.20398	0.565971	0.700104	0.633037	1.04882	0.838115	0.94347	0.916209	0.808283	0.862246	0.604895	0.664304	0.705427	0.744515	0.667626	0.677354
		1.80356	1.61613	1.70984	0.874896	1.02468	0.94979	0.979326	1.25083	1.11508	0.692274	1.12578	0.909029	0.811379	0.877514	0.809616	0.734161	0.830584	0.812651			1.39152	1.18241	1.28696	0.62746	0.686217	0.656839	1.08498	0.847295	0.966138	1.09048	0.770389	0.930436	0.937078	1.01929	1.29235	1.31214	1.19809	1.15179
		1.30682	1.27132	1.28907	1.05643	1.19432	1.12537	1.08979	1.34426	1.21703	0.896191	1.0277	0.961947	0.734702	0.790686	0.695275	0.666334	0.740857	0.725571			1.13876	1.29809	1.21843	0.752638	0.679629	0.716134	0.925908	0.962452	0.94418	1.17919	0.732683	0.955935	0.725776	0.788906	1.38806	1.51723	1.28339	1.14067

## Sheet: Fig_6D_LL50
Normalized absorbance at 695 nm	Blue		Dark				SD	Blue		Dark
Wavelength [nm]	CL_LT_B	CL_rpaB_T183P_B	CL_LT_D	CL_rpaB_T183P_D			Wavelength [nm]	CL_LT_B	CL_rpaB_T183P_B	CL_LT_D	CL_rpaB_T183P_D
620	0.226751	0.229573	0.16326	0.21934			620	0.102401	0.0591901	0.0741802	0.0765639																			S2/S1
621	0.217149	0.221595	0.155673	0.212923			621	0.0966459	0.0575387	0.068476	0.0750597												PSI/PSII	CL_LT_B	CL_rpaB_T183P_B	CL_LT_D	CL_rpaB_T183P_D			LT	rpaB_T183P
622	0.210861	0.219952	0.152172	0.207976			622	0.0899761	0.0568262	0.0628569	0.0700154													0.672268	0.67082	0.909099	0.646819			1.35229	0.964222
623	0.205857	0.217299	0.150449	0.202844			623	0.0848287	0.0538793	0.0593778	0.0647725													0.766659	0.678969	0.936588	0.78497			1.22165	1.15612
624	0.201413	0.214202	0.150386	0.200672			624	0.0825873	0.0519449	0.0578013	0.0626393													0.724052	0.698305	0.850763	0.73701			1.175	1.05543
625	0.199685	0.214877	0.150343	0.203901			625	0.0814038	0.0514524	0.0542553	0.0639431													0.717891	0.629856	0.867057	0.720855			1.20778	1.14448
626	0.200853	0.216297	0.154791	0.206997			626	0.0780916	0.047626	0.0545856	0.0609444													0.714154	0.649719	0.84992	0.641292			1.19011	0.98703
627	0.209712	0.225064	0.160302	0.216322			627	0.0797022	0.0469303	0.0527684	0.0649476													0.684467	0.703075	0.773911	0.810739			1.13068	1.15313
628	0.221977	0.240662	0.173418	0.233761			628	0.0840419	0.0425729	0.0551976	0.0673694													0.71437	0.709531	0.778364	0.751253			1.08958	1.0588
629	0.244971	0.270563	0.193749	0.269973			629	0.0898366	0.05057	0.0556833	0.0728375													0.701308	0.66927	0.823614	0.746916			1.1744	1.11602
630	0.276672	0.311086	0.226608	0.31272			630	0.0921247	0.0500188	0.0672597	0.0819218													0.671946	0.686725	0.832759	0.787135			1.23932	1.14622
631	0.322	0.363221	0.266074	0.368147			631	0.102873	0.0565028	0.0697571	0.0942082													0.668079	0.645457	0.810697	0.63723			1.21348	0.987254
632	0.374831	0.427971	0.320073	0.437457			632	0.113514	0.0644591	0.0835163	0.1138													0.654411	0.617331	0.790299	0.738457			1.20765	1.19621
633	0.445243	0.505127	0.38321	0.522897			633	0.126565	0.0693735	0.0913709	0.134751													0.629202	0.790338	0.769091	0.755739			1.22233	0.956223
634	0.516943	0.597716	0.445387	0.61808			634	0.138099	0.0744392	0.106604	0.149482													0.669036	0.676059	0.803677	0.745734			1.20125	1.10306
635	0.597105	0.691379	0.517245	0.71134			635	0.154825	0.089116	0.110882	0.170023													0.717478	0.643482	0.850679	0.651382			1.18565	1.01228
636	0.677249	0.782852	0.586739	0.801388			636	0.159812	0.0994625	0.118374	0.179805													0.713728	0.738351	0.874	0.754684
637	0.762625	0.875219	0.665073	0.897021			637	0.169543	0.109541	0.12148	0.188167
638	0.861942	0.993319	0.758991	1.00852			638	0.187253	0.132587	0.143706	0.213435
639	0.983617	1.12386	0.868949	1.14482			639	0.199336	0.135951	0.162401	0.228351											Statistics		CL_LT_B	CL_rpaB_T183P_B	CL_LT_D	CL_rpaB_T183P_D
640	1.10496	1.28151	0.989406	1.29155			640	0.221	0.152093	0.181159	0.249704											*** p≤0.001	CL_LT_B		0.338494	9.05482e-10		Statistics		LT	rpaB_T183P
641	1.25957	1.44702	1.11962	1.47154			641	0.245421	0.179253	0.189716	0.265572											** p≤0.01	CL_rpaB_T183P_B	0.338494			0.0174192	*** p≤0.001	LT		6.85169e-05
642	1.40995	1.60918	1.25524	1.65368			642	0.275846	0.202288	0.211865	0.30842											* p≤0.05	CL_LT_D				6.31957e-06	** p≤0.01	rpaB_T183P	6.85169e-05
643	1.55679	1.78934	1.3981	1.84106			643	0.294097	0.221767	0.225458	0.330964											insignificant	CL_rpaB_T183P_D		9.13e-10			* p≤0.05
644	1.72247	1.9866	1.52513	2.00634			644	0.317488	0.251547	0.250283	0.362559																	insignificant
645	1.8338	2.12768	1.62437	2.13241			645	0.342195	0.280417	0.254537	0.39545												Group superscript
646	1.91087	2.19158	1.68835	2.2171			646	0.344432	0.28511	0.253611	0.41749												Average	0.694603	0.680486	0.834701	0.727348		Group superscript
647	1.92496	2.23439	1.70959	2.23648			647	0.349804	0.324319	0.263681	0.425798												SD	0.0345102	0.0442897	0.0493263	0.0565281		Average	1.18914	1.08248
648	1.90046	2.20267	1.70821	2.25394			648	0.354656	0.344099	0.289628	0.4356												% to LT		0.979676		0.871387		SD	0.0406879	0.0780723
649	1.86245	2.18754	1.66967	2.21126			649	0.324816	0.353801	0.268601	0.438835															1.20169	1.06887				0.910302
650	1.83783	2.13334	1.64548	2.17632			650	0.3274	0.3602	0.273459	0.463745
651	1.80759	2.09789	1.64164	2.16542			651	0.337106	0.347482	0.261803	0.449415
652	1.81315	2.09835	1.67186	2.1321			652	0.318386	0.372736	0.285994	0.435691
653	1.80724	2.08248	1.66072	2.13343			653	0.318819	0.363117	0.272482	0.412916
654	1.82494	2.06563	1.67782	2.11096			654	0.311917	0.400773	0.272568	0.454952
655	1.80287	2.02059	1.67646	2.10179			655	0.304164	0.413382	0.278218	0.411994
656	1.80881	2.00454	1.68967	2.07692			656	0.309513	0.41551	0.268662	0.431616
657	1.81016	1.97676	1.69615	2.02599			657	0.298883	0.386049	0.280082	0.413014
658	1.81072	1.91805	1.69338	1.99657			658	0.304492	0.412233	0.28964	0.414133
659	1.76075	1.84739	1.65319	1.90541			659	0.310852	0.427967	0.255874	0.418091
660	1.72449	1.77283	1.62689	1.82326			660	0.293956	0.427833	0.26312	0.367359
661	1.68953	1.69846	1.59594	1.74842			661	0.296788	0.435474	0.269229	0.374525
662	1.64969	1.63309	1.55462	1.69916			662	0.287471	0.441347	0.272324	0.370336
663	1.59174	1.52661	1.50121	1.58269			663	0.298928	0.383659	0.272843	0.354638
664	1.51367	1.45058	1.42204	1.49253			664	0.295273	0.37268	0.277453	0.333492
665	1.4293	1.354	1.33902	1.40535			665	0.290644	0.387087	0.26386	0.32999
666	1.33586	1.25588	1.25157	1.29194			666	0.268588	0.350497	0.247859	0.30025
667	1.24121	1.13472	1.14819	1.19285			667	0.243018	0.312981	0.231905	0.278001
668	1.15523	1.04262	1.05903	1.08983			668	0.244835	0.293987	0.216844	0.270652
669	1.05775	0.965928	0.974302	0.995482			669	0.220892	0.278309	0.20206	0.241163
670	0.969326	0.884374	0.897651	0.921856			670	0.20597	0.263721	0.182754	0.235249
671	0.913716	0.823285	0.839429	0.849601			671	0.187806	0.243269	0.17281	0.220595
672	0.855958	0.761465	0.779811	0.788473			672	0.18469	0.223846	0.155913	0.208293
673	0.811949	0.720768	0.740163	0.741343			673	0.172268	0.224295	0.15321	0.207335
674	0.77616	0.665795	0.692479	0.694934			674	0.167473	0.220217	0.144204	0.197166
675	0.749897	0.646436	0.679772	0.664848			675	0.160377	0.220521	0.141515	0.206486
676	0.756389	0.626078	0.671862	0.64261			676	0.169987	0.215577	0.145479	0.210458
677	0.797398	0.631669	0.701251	0.641161			677	0.168931	0.246677	0.155062	0.216428
678	0.861301	0.661479	0.747924	0.674143			678	0.186328	0.248861	0.169585	0.2443
679	0.953971	0.716821	0.831452	0.726202			679	0.195605	0.259927	0.190237	0.277649
680	1.07897	0.80268	0.920143	0.812276			680	0.222072	0.280665	0.207481	0.295936
681	1.22678	0.919658	1.04784	0.925501			681	0.260236	0.301865	0.236962	0.320328
682	1.3877	1.06203	1.17437	1.04266			682	0.290402	0.317211	0.251881	0.331952
683	1.49684	1.14009	1.25186	1.10421			683	0.288613	0.314913	0.259946	0.332071
684	1.54923	1.1757	1.29844	1.13326			684	0.284604	0.293883	0.26159	0.316218
685	1.58909	1.18511	1.32751	1.15343			685	0.270164	0.274491	0.254772	0.318135
686	1.60573	1.24122	1.36451	1.19124			686	0.260496	0.27813	0.243962	0.285763
687	1.6387	1.29567	1.39024	1.24082			687	0.239355	0.240302	0.221864	0.254795
688	1.65495	1.35387	1.41002	1.28837			688	0.212542	0.204853	0.208836	0.227439
689	1.64066	1.40249	1.38558	1.3391			689	0.181654	0.202809	0.181681	0.216865
690	1.62816	1.48685	1.38689	1.39511			690	0.154155	0.161052	0.16588	0.194733
691	1.62557	1.51094	1.35014	1.42945			691	0.146	0.132062	0.146852	0.175538
692	1.59287	1.53516	1.33162	1.43539			692	0.136736	0.134916	0.12461	0.1579
693	1.56174	1.54469	1.29796	1.44142			693	0.11673	0.112196	0.114254	0.13436
694	1.50525	1.52968	1.26036	1.42361			694	0.0935666	0.0917917	0.0951597	0.128896
695	1.443	1.4751	1.20186	1.38301			695	0.0718537	0.0918118	0.0695765	0.112554
696	1.35128	1.38455	1.1421	1.30464			696	0.074927	0.0935469	0.0669917	0.0867954
697	1.26522	1.30076	1.05578	1.20733			697	0.0635766	0.0908626	0.0609469	0.0959485
698	1.14605	1.19102	0.986087	1.11738			698	0.062155	0.070622	0.0575528	0.0807424
699	1.05859	1.0837	0.920547	1.02856			699	0.0548725	0.0753669	0.0517521	0.0771374
700	1.00236	1.01957	0.861083	0.956554			700	0.0479996	0.0579633	0.0409159	0.0778234
701	0.932711	0.957886	0.820831	0.896298			701	0.0435597	0.0442193	0.0417459	0.073055
702	0.890175	0.88504	0.793518	0.848578			702	0.0436683	0.0435176	0.0372662	0.0746752
703	0.848592	0.853032	0.763539	0.810722			703	0.0460491	0.0488467	0.0334894	0.0669594
704	0.832577	0.819884	0.750984	0.800956			704	0.036448	0.0425706	0.0261729	0.0596691
705	0.817266	0.802201	0.756507	0.787379			705	0.0355849	0.0247689	0.0281849	0.0596782
706	0.81647	0.802238	0.758085	0.777107			706	0.0380755	0.0362827	0.0325646	0.0640673
707	0.823155	0.80369	0.766751	0.79204			707	0.0335785	0.02879	0.0268772	0.0549948
708	0.827853	0.814934	0.791712	0.804846			708	0.0316546	0.0293818	0.0277567	0.0510598
709	0.861777	0.835045	0.814756	0.826198			709	0.0368553	0.0316509	0.0297403	0.0580369
710	0.881306	0.865634	0.837058	0.855925			710	0.028738	0.0301532	0.0284212	0.0530223
711	0.914319	0.878452	0.875023	0.870396			711	0.0353469	0.0260134	0.0339384	0.0465216
712	0.938565	0.912719	0.909106	0.916727			712	0.0323287	0.0297832	0.023104	0.0475107
713	0.977304	0.946736	0.939822	0.948075			713	0.0248828	0.0257002	0.0242397	0.039124
714	1.00884	0.97914	0.994788	0.981666			714	0.0272183	0.0271036	0.0281584	0.044137
715	1.03731	1.0086	1.02074	1.00949			715	0.0327884	0.0300333	0.0184026	0.0333466
716	1.0633	1.03472	1.04145	1.0372			716	0.0263409	0.0274862	0.0274515	0.0310115
717	1.08779	1.05722	1.06566	1.05479			717	0.018189	0.020324	0.0285503	0.0359262
718	1.093	1.08867	1.08086	1.07585			718	0.0281607	0.0809363	0.019671	0.0417045
719	1.10312	1.07939	1.08818	1.08204			719	0.0238308	0.0339557	0.0286417	0.0275038
720	1.10687	1.07658	1.09622	1.09234			720	0.0216614	0.0298645	0.028568	0.0331176
721	1.10395	1.0881	1.09069	1.07856			721	0.0280852	0.0379151	0.0213073	0.0318549
722	1.08931	1.07853	1.06753	1.06715			722	0.0199461	0.0314047	0.0306986	0.0274204
723	1.06178	1.04445	1.05262	1.04443			723	0.0317026	0.0365248	0.0307379	0.0289842
724	1.02846	1.02622	1.02346	1.02607			724	0.0264066	0.0352991	0.0266806	0.0341005
725	1	1	1	1			725	0	0	0	0
726	0.974832	0.960148	0.964849	0.96611			726	0.0225527	0.0235893	0.0170704	0.0383077
727	0.925034	0.934544	0.925265	0.931546			727	0.0260825	0.0287625	0.0175873	0.0341224
728	0.901108	0.885587	0.883159	0.891669			728	0.0261001	0.0272342	0.0173902	0.0229319
729	0.855837	0.849517	0.836143	0.848708			729	0.0214945	0.0283054	0.0184477	0.0278892
730	0.804922	0.810907	0.795487	0.806338			730	0.0170577	0.0310417	0.0209782	0.0217727
731	0.765926	0.764171	0.751436	0.756802			731	0.0167477	0.0219012	0.0107607	0.0383953
732	0.725283	0.731564	0.714867	0.716492			732	0.0194307	0.0237596	0.0182839	0.0344202
733	0.67897	0.688121	0.667419	0.674922			733	0.0202044	0.0277411	0.0177466	0.025314
734	0.644577	0.640461	0.627564	0.635618			734	0.0158405	0.0220817	0.0152061	0.0205747
735	0.602301	0.598465	0.589898	0.591771			735	0.0145397	0.0276119	0.0213156	0.019834
736	0.567175	0.568201	0.554743	0.551276			736	0.0137768	0.0254124	0.0172206	0.0195878
737	0.53115	0.541535	0.519723	0.525236			737	0.0171904	0.0218262	0.0178306	0.0172307
738	0.500172	0.499954	0.489393	0.488319			738	0.0185917	0.0269462	0.0223744	0.0199698
739	0.474547	0.472295	0.464554	0.463293			739	0.0151824	0.0221527	0.0206509	0.018956
740	0.44562	0.44402	0.43153	0.440848			740	0.0144537	0.0240982	0.0132134	0.0149894
741	0.428498	0.42305	0.401636	0.414172			741	0.0150172	0.0246639	0.0125506	0.0171891
742	0.40205	0.399573	0.3831	0.389234			742	0.0162173	0.0237629	0.00959881	0.0215339
743	0.38341	0.376782	0.364911	0.370721			743	0.0129053	0.0189425	0.00955354	0.0156519
744	0.364982	0.358173	0.346757	0.352714			744	0.011699	0.0211407	0.00756944	0.0143188
745	0.344249	0.345722	0.329584	0.334121			745	0.0150731	0.020739	0.00916507	0.0181352
746	0.332686	0.335198	0.314483	0.319784			746	0.0120338	0.0246816	0.0099264	0.0173285
747	0.315664	0.312399	0.297504	0.30543			747	0.0113029	0.0224636	0.0105368	0.0254231
748	0.307992	0.30063	0.284397	0.288098			748	0.0164739	0.0207805	0.00798144	0.0190371
749	0.2939	0.282468	0.272001	0.276559			749	0.0151061	0.0204368	0.00776901	0.0237591
750	0.279464	0.274748	0.257186	0.26552			750	0.0135502	0.0232862	0.00881802	0.0222966
751	0.266088	0.261971	0.246695	0.250039			751	0.012845	0.0208413	0.0106813	0.0179448
752	0.256505	0.248401	0.235298	0.239431			752	0.0119172	0.0215488	0.0097521	0.0184603
753	0.247934	0.241014	0.225418	0.230686			753	0.0134078	0.0228385	0.0102833	0.0209888
754	0.237805	0.233814	0.211213	0.219512			754	0.0125051	0.0242843	0.00710095	0.0199618
755	0.22345	0.222506	0.203881	0.212733			755	0.0105206	0.0208922	0.00910273	0.0183862
756	0.211698	0.214123	0.191199	0.19918			756	0.0102109	0.0231651	0.00769189	0.0182175
757	0.204456	0.207399	0.182214	0.192059			757	0.0113603	0.0244084	0.00882058	0.0168965
758	0.1951	0.197052	0.178865	0.18303			758	0.0152576	0.0229288	0.00789248	0.0158449
759	0.18391	0.184759	0.16895	0.175558			759	0.0145724	0.0191627	0.00675436	0.0179602
760	0.173727	0.178171	0.157801	0.167855			760	0.0148157	0.0194083	0.00869053	0.0194034
761	0.171042	0.171852	0.151271	0.162395			761	0.0119771	0.0211225	0.00798553	0.0194591
762	0.164508	0.162982	0.145955	0.156139			762	0.012818	0.0197746	0.00807048	0.0202536
763	0.159767	0.157977	0.142187	0.148828			763	0.0160178	0.0187233	0.00817473	0.0171372
764	0.152674	0.153357	0.134368	0.143427			764	0.0132651	0.0161428	0.00844319	0.0205279
765	0.146022	0.147938	0.1301	0.138061			765	0.0105549	0.0238229	0.00779926	0.0193004
766	0.142092	0.141115	0.125012	0.131888			766	0.0156423	0.0173767	0.00852852	0.0188532
767	0.137219	0.136432	0.120198	0.128402			767	0.0134422	0.0220717	0.00664606	0.0175773
768	0.131916	0.132842	0.117482	0.123028			768	0.0152755	0.0202787	0.0076079	0.0166318
769	0.129643	0.126889	0.11154	0.118152			769	0.0147783	0.0194387	0.0080939	0.0178915
770	0.123079	0.123046	0.109494	0.11575			770	0.0110878	0.0183578	0.00842276	0.0212647
771	0.120229	0.122827	0.10826	0.111422			771	0.0134994	0.0181222	0.00674087	0.0149181
772	0.116322	0.12003	0.102417	0.110469			772	0.0129725	0.0200312	0.00699005	0.0167816
773	0.111139	0.119495	0.100429	0.10653			773	0.0122862	0.0218897	0.00682011	0.0154728
774	0.107244	0.11511	0.0979976	0.103506			774	0.0113328	0.0212257	0.00964696	0.0145826
775	0.106727	0.110063	0.0941617	0.100477			775	0.0121911	0.0165439	0.00743202	0.0150975
776	0.102323	0.109887	0.0923175	0.0973773			776	0.0125566	0.0221303	0.00652122	0.0149123
777	0.100139	0.107028	0.0882006	0.0948571			777	0.0107736	0.0212554	0.00812565	0.0147622
778	0.0992703	0.101958	0.08644	0.0936701			778	0.0124327	0.0156637	0.00601616	0.0121999
779	0.0947385	0.100097	0.0837581	0.0921368			779	0.0127389	0.017365	0.00766338	0.0159932
780	0.0912962	0.100717	0.0814207	0.0894708			780	0.0127226	0.0193369	0.00697084	0.011644
781	0.0896057	0.0980308	0.0785188	0.088069			781	0.014217	0.0181306	0.0065758	0.0135013
782	0.089054	0.0946704	0.0766901	0.0866906			782	0.0126896	0.0193617	0.00636577	0.0145857
783	0.0861784	0.0926662	0.07604	0.0846711			783	0.0121014	0.018823	0.00767593	0.0149544
784	0.0806855	0.0901358	0.072839	0.0796593			784	0.0103313	0.0175772	0.00670111	0.0139785
785	0.0850966	0.0878682	0.072254	0.081021			785	0.0162147	0.0181126	0.00747641	0.0127999
786	0.0788791	0.086809	0.0698052	0.0792545			786	0.0124574	0.0188969	0.00588575	0.0145474
787	0.0780261	0.0839346	0.0682245	0.0770025			787	0.0145739	0.0156944	0.00714366	0.015289
788	0.0759674	0.0830181	0.0677844	0.0749522			788	0.0130467	0.0180223	0.0075677	0.0153594
789	0.0740068	0.0814958	0.0666798	0.0755416			789	0.0114703	0.0174626	0.00630343	0.0122808
790	0.0729524	0.0833884	0.0648663	0.0728219			790	0.0108983	0.0212552	0.00681799	0.012941
791	0.0696462	0.0800711	0.063508	0.0722569			791	0.0103017	0.0189418	0.00739109	0.0153738
792	0.0704988	0.0775498	0.0601835	0.0702535			792	0.0121638	0.0160448	0.00477637	0.0142942
793	0.0698629	0.0755436	0.06242	0.0681907			793	0.0133579	0.0175564	0.00592454	0.0135929
794	0.0668457	0.0759181	0.059002	0.0670329			794	0.0121702	0.0164473	0.00603325	0.0127332
795	0.0656508	0.0742072	0.0581497	0.0663583			795	0.012169	0.0167133	0.00645558	0.0137818
796	0.0664526	0.0738786	0.0581034	0.0646806			796	0.0137244	0.0157208	0.00739915	0.0108906
797	0.0659691	0.070572	0.0567656	0.0663983			797	0.014177	0.01709	0.00662836	0.0124495
798	0.0642033	0.0714148	0.0554594	0.0633203			798	0.0144441	0.0167049	0.00709639	0.0142413
799	0.0632835	0.0696907	0.0534965	0.0629983			799	0.011886	0.0173039	0.00650024	0.0146634
800	0.0600341	0.0671693	0.0535116	0.060334			800	0.0145837	0.015858	0.00604177	0.0131662

## Sheet: Fig_6D_HL700
Normalized absorbance at 695 nm	Blue		Dark				SD	Blue		Dark
Wavelength [nm]	HL_LT_B	HL_rpaB_T183P_B	HL_LT_D	HL_rpaB_T183P_D			Wavelength [nm]	HL_LT_B	HL_rpaB_T183P_B	HL_LT_D	HL_rpaB_T183P_D
620	1.71461	1.41432	1.22064	0.995546			620	0.479808	0.250509	0.271842	0.285055																			S2/S1
621	1.6548	1.37745	1.1808	0.956335			621	0.479128	0.220433	0.267708	0.266762												PSI/PSII	HL_LT_B	HL_rpaB_T183P_B	HL_LT_D	HL_rpaB_T183P_D			LT	rpaB_T183P
622	1.56957	1.3157	1.12052	0.922095			622	0.419983	0.209628	0.24405	0.256545													0.387084	0.443624	0.37627	0.458526			0.972064	1.03359
623	1.50926	1.27327	1.08182	0.893121			623	0.412748	0.206392	0.231584	0.238564													0.363297	0.480317	0.373217	0.443506			1.02731	0.923362
624	1.45926	1.25964	1.06125	0.870097			624	0.375939	0.201651	0.202057	0.230193													0.418053	0.423751	0.36507	0.389143			0.873263	0.918331
625	1.42492	1.23397	1.02385	0.861283			625	0.346188	0.227998	0.20363	0.221183													0.40615	0.412335	0.359166	0.384552			0.88432	0.93262
626	1.39811	1.22903	1.01171	0.860728			626	0.338523	0.189835	0.180953	0.22034													0.383552	0.418456	0.407934	0.448122			1.06357	1.07089
627	1.383	1.23471	1.0136	0.873			627	0.318335	0.209802	0.176774	0.20508													0.402939	0.425423	0.389798	0.457088			0.967387	1.07443
628	1.40477	1.28151	1.02393	0.908676			628	0.314338	0.202446	0.177879	0.205559													0.345811	0.429516	0.344781	0.357311			0.997019	0.831891
629	1.45356	1.37248	1.0446	0.983323			629	0.305353	0.22792	0.168707	0.23047													0.34713	0.419261	0.343401	0.3787			0.989258	0.903258
630	1.52333	1.49467	1.1033	1.07524			630	0.294486	0.228959	0.179767	0.238856													0.35312	0.404024	0.375124	0.349602			1.06231	0.8653
631	1.61232	1.62375	1.17444	1.19297			631	0.303925	0.238293	0.165126	0.246956													0.363346	0.484273	0.419002	0.345164			1.15318	0.712748
632	1.697	1.78449	1.26668	1.30483			632	0.292335	0.257041	0.173339	0.253149													0.375166	0.417812	0.410036	0.345036			1.09295	0.825815
633	1.83564	1.98441	1.35957	1.4401			633	0.309302	0.247497	0.172507	0.244134													0.398632	0.351874	0.409405	0.349659			1.02703	0.993705
634	1.94581	2.14324	1.44202	1.58573			634	0.294778	0.242614	0.163408	0.271707													0.391718	0.389639	0.368515	0.337627			0.940768	0.866513
635	2.00858	2.26872	1.50643	1.69748			635	0.311213	0.247269	0.179775	0.27205													0.371769	0.335719	0.386251	0.355409			1.03895	1.05865
636	2.08525	2.38968	1.54771	1.78741			636	0.283516	0.274957	0.158187	0.276152													0.441643	0.476467	0.390635	0.344948			0.884504	0.72397
637	2.19173	2.53075	1.6228	1.89442			637	0.296964	0.270574	0.173925	0.278101													0.431803	0.398932	0.389495	0.354674			0.90202	0.889059
638	2.31372	2.6628	1.72713	2.01459			638	0.312896	0.260127	0.166915	0.281414
639	2.4351	2.87153	1.85554	2.17213			639	0.324217	0.281438	0.167193	0.299372											Statistics		HL_LT_B	HL_rpaB_T183P_B	HL_LT_D	HL_rpaB_T183P_D
640	2.58745	3.07967	1.97714	2.35119			640	0.313795	0.303294	0.178486	0.311016											*** p≤0.001	HL_LT_B		0.00711223	0.827046		Statistics		LT	rpaB_T183P
641	2.78885	3.34369	2.12172	2.54417			641	0.35102	0.315322	0.192954	0.297115											** p≤0.01	HL_rpaB_T183P_B	0.00711223			0.0251374	*** p≤0.001	LT		0.0381263
642	3.01593	3.63595	2.32137	2.76667			642	0.367705	0.313405	0.195958	0.314382											* p≤0.05	HL_LT_D				0.897776	** p≤0.01	rpaB_T183P	0.0381263
643	3.21783	3.90769	2.46368	2.96727			643	0.423568	0.308132	0.19671	0.362953											insignificant	HL_rpaB_T183P_D		0.00350284			* p≤0.05
644	3.40086	4.0893	2.59774	3.12822			644	0.431427	0.27724	0.235597	0.348521																	insignificant
645	3.53094	4.30826	2.72412	3.26409			645	0.45597	0.334238	0.246131	0.371235												Group superscript
646	3.63279	4.31726	2.77978	3.32382			646	0.461223	0.333708	0.252256	0.365181												Average	0.383294	0.420833	0.38124	0.38296		Group superscript
647	3.66217	4.31621	2.80915	3.36102			647	0.454421	0.308935	0.253924	0.364339												SD	0.0273361	0.0419415	0.0235217	0.0456551		Average	0.993589	0.906036
648	3.63321	4.27922	2.82938	3.32947			648	0.473862	0.312716	0.250388	0.354666												% to LT		1.09794		1.00451		SD	0.0842965	0.111365
649	3.59718	4.22007	2.82446	3.30089			649	0.482675	0.328286	0.261827	0.346469															0.994642	0.910004				0.911883
650	3.61519	4.19015	2.87645	3.28868			650	0.465498	0.350306	0.293331	0.345435
651	3.61306	4.12801	2.92992	3.33684			651	0.489162	0.347233	0.307323	0.346802
652	3.65305	4.09395	3.01378	3.35978			652	0.526026	0.308974	0.322582	0.3382
653	3.73594	4.0472	3.09864	3.35492			653	0.534856	0.335084	0.367572	0.336456
654	3.71876	3.94403	3.17418	3.34051			654	0.520355	0.294037	0.403737	0.314333
655	3.73579	3.76962	3.23507	3.30253			655	0.481493	0.281342	0.360529	0.320353
656	3.75776	3.70444	3.33537	3.27438			656	0.529197	0.356252	0.375734	0.315963
657	3.88344	3.65835	3.47122	3.32457			657	0.571862	0.367476	0.406	0.308315
658	3.95303	3.60672	3.59949	3.33698			658	0.580487	0.318068	0.436597	0.351335
659	3.77123	3.28876	3.54747	3.20197			659	0.596116	0.314609	0.462719	0.316241
660	3.56866	3.06874	3.57166	3.0565			660	0.534662	0.336618	0.427906	0.286997
661	3.51053	2.89656	3.60869	3.01272			661	0.573136	0.330438	0.44159	0.29658
662	3.47152	2.73172	3.61851	2.93127			662	0.617162	0.335296	0.471489	0.278228
663	3.36323	2.56723	3.60885	2.84858			663	0.608628	0.297162	0.484261	0.298314
664	3.23344	2.43087	3.55193	2.70026			664	0.605777	0.342992	0.453762	0.305782
665	3.1108	2.25314	3.44188	2.60392			665	0.593025	0.325711	0.515244	0.304161
666	2.94195	2.1617	3.29818	2.45785			666	0.580899	0.317788	0.464038	0.252334
667	2.76777	2.02587	3.16199	2.32891			667	0.549003	0.315223	0.460642	0.248486
668	2.62029	1.92078	3.00403	2.23554			668	0.514839	0.299575	0.435922	0.262448
669	2.49608	1.8485	2.85173	2.17434			669	0.468502	0.284776	0.427279	0.26455
670	2.39829	1.76504	2.73967	2.08944			670	0.466027	0.259983	0.440081	0.245157
671	2.30283	1.77241	2.66458	2.05271			671	0.474041	0.282043	0.43645	0.23555
672	2.28512	1.78103	2.61801	2.0857			672	0.433148	0.254194	0.428111	0.255905
673	2.30044	1.80988	2.63368	2.16664			673	0.431222	0.261033	0.427205	0.264191
674	2.36634	1.91944	2.73284	2.30414			674	0.452504	0.304716	0.451268	0.291622
675	2.45167	2.06907	2.87667	2.4784			675	0.481682	0.291139	0.444358	0.314382
676	2.62889	2.25108	3.10731	2.79955			676	0.542676	0.325348	0.478317	0.398227
677	2.90001	2.54399	3.51783	3.22328			677	0.568381	0.374014	0.582922	0.431753
678	3.22051	2.87492	3.9365	3.72589			678	0.646967	0.398255	0.56688	0.524445
679	3.62802	3.24712	4.52552	4.19616			679	0.669838	0.461132	0.664304	0.613636
680	4.07788	3.65196	5.03862	4.70911			680	0.759775	0.521752	0.624565	0.666076
681	4.53632	4.05813	5.60141	5.26351			681	0.783256	0.589264	0.697634	0.757834
682	4.91852	4.43891	5.97525	5.75283			682	0.791816	0.598045	0.729025	0.80483
683	5.13367	4.70282	6.21865	6.07191			683	0.785821	0.635156	0.683649	0.77279
684	5.08806	4.72601	6.13302	6.0868			684	0.729534	0.631786	0.653907	0.788249
685	4.95531	4.61634	5.84107	5.88184			685	0.733116	0.580884	0.626303	0.69884
686	4.67919	4.42566	5.56392	5.59951			686	0.63561	0.541748	0.514922	0.637459
687	4.38252	4.15646	5.12932	5.24781			687	0.548768	0.488644	0.438034	0.620707
688	4.12063	3.88221	4.67806	4.85036			688	0.47047	0.418757	0.389865	0.518688
689	3.89999	3.65832	4.31695	4.45498			689	0.439334	0.386077	0.356455	0.479573
690	3.63809	3.42134	3.98648	4.08554			690	0.39119	0.336578	0.29011	0.437556
691	3.44201	3.2031	3.66723	3.75828			691	0.265402	0.339957	0.253103	0.400352
692	3.22576	3.00036	3.36516	3.42726			692	0.26037	0.329972	0.236399	0.35317
693	3.03264	2.79168	3.10396	3.15735			693	0.211702	0.299149	0.20566	0.339572
694	2.81303	2.61221	2.86527	2.8725			694	0.21598	0.286458	0.151248	0.282916
695	2.60204	2.40631	2.62834	2.65464			695	0.192707	0.246291	0.158599	0.285378
696	2.38584	2.22005	2.38595	2.41912			696	0.165903	0.213316	0.145434	0.263074
697	2.20992	2.05884	2.1776	2.19198			697	0.139672	0.199209	0.119912	0.231604
698	2.01844	1.8858	1.98758	2.01453			698	0.123777	0.167938	0.0885422	0.211175
699	1.85041	1.74778	1.8402	1.85362			699	0.105838	0.137951	0.0804779	0.181676
700	1.7171	1.62513	1.70065	1.72342			700	0.0997409	0.1406	0.0705771	0.167437
701	1.61691	1.53154	1.58917	1.59419			701	0.0931587	0.118007	0.0762726	0.144937
702	1.51529	1.45228	1.49589	1.49915			702	0.0830344	0.115447	0.0784007	0.145247
703	1.43445	1.35988	1.4142	1.43613			703	0.0759237	0.0910538	0.0592403	0.125996
704	1.36923	1.32785	1.33803	1.37969			704	0.0697223	0.0888568	0.0678903	0.120152
705	1.33273	1.28579	1.30093	1.32554			705	0.0717699	0.0928621	0.0725497	0.109548
706	1.29799	1.25559	1.26327	1.29846			706	0.0568716	0.068464	0.0533764	0.0891331
707	1.24673	1.24164	1.24099	1.27389			707	0.0506919	0.0686649	0.0550488	0.0943146
708	1.25008	1.2113	1.22145	1.24246			708	0.0575932	0.0679386	0.0617307	0.089275
709	1.22713	1.20976	1.21491	1.22613			709	0.0610816	0.0620554	0.0527447	0.0560302
710	1.2271	1.20599	1.20889	1.21517			710	0.0634744	0.0622156	0.0375454	0.0636559
711	1.20725	1.20558	1.21781	1.2234			711	0.0538417	0.0566859	0.0477377	0.0532714
712	1.2064	1.20455	1.2006	1.22262			712	0.0471316	0.0624043	0.0453666	0.044666
713	1.21411	1.21303	1.20985	1.2278			713	0.0406397	0.0487649	0.0576598	0.043726
714	1.21542	1.20429	1.19719	1.23622			714	0.0509004	0.0537505	0.0531286	0.0342681
715	1.22453	1.20034	1.22799	1.23778			715	0.0543373	0.0531664	0.0522706	0.041176
716	1.22808	1.212	1.20136	1.24279			716	0.0560728	0.0540679	0.0390638	0.0339354
717	1.21055	1.20695	1.21158	1.21751			717	0.0784312	0.0450728	0.0538591	0.033727
718	1.19393	1.20436	1.18916	1.22726			718	0.0457118	0.0539083	0.0519267	0.0274293
719	1.18947	1.18654	1.19036	1.20405			719	0.0418658	0.0390351	0.0360032	0.0402646
720	1.16568	1.16463	1.15763	1.1744			720	0.0375298	0.0478639	0.040197	0.0362172
721	1.14153	1.1308	1.14358	1.17296			721	0.0304133	0.0484913	0.0485957	0.0311481
722	1.09847	1.09623	1.10089	1.12367			722	0.0407543	0.0376399	0.0450123	0.0278414
723	1.07482	1.06422	1.07129	1.08254			723	0.0408308	0.0348933	0.0412807	0.0315022
724	1.04324	1.02046	1.03167	1.05373			724	0.0379982	0.0405774	0.0350995	0.0270767
725	1	1	1	1			725	0	0	0	0
726	0.968773	0.949771	0.972275	0.972141			726	0.0476	0.0259388	0.0415714	0.0287007
727	0.941598	0.924736	0.935478	0.936342			727	0.0395212	0.0358796	0.0406346	0.0267511
728	0.908681	0.877044	0.899751	0.895501			728	0.0457559	0.0360022	0.0363689	0.0273641
729	0.866737	0.84557	0.862679	0.856754			729	0.0341767	0.042822	0.0393332	0.0208525
730	0.839169	0.815013	0.82273	0.824992			730	0.0370337	0.0355856	0.027495	0.040825
731	0.803771	0.780476	0.786954	0.784451			731	0.0321416	0.0374892	0.0197836	0.0311951
732	0.774599	0.746	0.769099	0.744423			732	0.0361968	0.0364466	0.0300221	0.0333662
733	0.746749	0.72308	0.723099	0.703743			733	0.0441834	0.0299327	0.0387269	0.0335489
734	0.70795	0.66449	0.692591	0.684013			734	0.0334052	0.038944	0.0343301	0.0391347
735	0.67902	0.655698	0.6634	0.646128			735	0.0327729	0.0277256	0.0275213	0.0418138
736	0.658608	0.621677	0.634511	0.614666			736	0.0355025	0.0378395	0.031728	0.0298251
737	0.633558	0.597054	0.606325	0.601635			737	0.0303595	0.0416884	0.0368317	0.0452568
738	0.616626	0.578893	0.592281	0.567554			738	0.0388408	0.0323679	0.0328854	0.0358062
739	0.595813	0.573039	0.566613	0.562229			739	0.0328359	0.0341266	0.0323084	0.0383096
740	0.584284	0.547129	0.562395	0.535657			740	0.0436121	0.0367343	0.0482818	0.0358397
741	0.576913	0.527952	0.54433	0.523899			741	0.039797	0.0421174	0.0307119	0.0409568
742	0.545088	0.521322	0.527687	0.51228			742	0.0368603	0.0333993	0.0421291	0.0377831
743	0.538134	0.506603	0.521957	0.498002			743	0.03287	0.0441005	0.0423515	0.0502751
744	0.524237	0.48976	0.503298	0.485874			744	0.0348393	0.0436256	0.0393542	0.0467846
745	0.515879	0.485271	0.506619	0.479906			745	0.0275252	0.0418446	0.0399006	0.0458914
746	0.510552	0.481052	0.484833	0.470607			746	0.0333319	0.0450066	0.0322668	0.0487618
747	0.49424	0.459278	0.469705	0.459427			747	0.0362621	0.0337424	0.0337433	0.0428284
748	0.490635	0.454372	0.46609	0.453752			748	0.0366891	0.0419737	0.0362063	0.0440491
749	0.480463	0.440696	0.45716	0.441574			749	0.0350535	0.0449917	0.0400036	0.0447746
750	0.455907	0.435362	0.435302	0.432353			750	0.0347927	0.041731	0.0359051	0.0492442
751	0.45644	0.42847	0.422422	0.417875			751	0.0326165	0.0479641	0.0336711	0.0554634
752	0.441775	0.41938	0.418688	0.40349			752	0.0357772	0.044437	0.0350354	0.0539755
753	0.435089	0.401694	0.407682	0.394434			753	0.0402992	0.0412344	0.0338094	0.0507901
754	0.426849	0.389815	0.392284	0.378755			754	0.0377015	0.0365724	0.0313044	0.0516437
755	0.4179	0.381657	0.373025	0.366157			755	0.0449654	0.0396858	0.0341157	0.0496914
756	0.396498	0.373066	0.365696	0.361515			756	0.0258866	0.0424731	0.0315499	0.0549351
757	0.389325	0.359004	0.359331	0.34973			757	0.0386649	0.0428305	0.0336344	0.0549537
758	0.384485	0.349379	0.343538	0.330798			758	0.0372947	0.0450031	0.037956	0.0506397
759	0.367739	0.338761	0.331292	0.32062			759	0.0351666	0.0395349	0.0355225	0.0421169
760	0.364656	0.339897	0.325608	0.31693			760	0.0326885	0.0461049	0.0336765	0.0544051
761	0.357605	0.329471	0.309608	0.302923			761	0.0386942	0.0450619	0.0373928	0.0535962
762	0.353658	0.331073	0.308516	0.301244			762	0.0381219	0.0446232	0.0402186	0.0478605
763	0.34367	0.328858	0.31077	0.304248			763	0.0393991	0.0444727	0.0376162	0.05211
764	0.344361	0.320728	0.303462	0.290247			764	0.0389729	0.050384	0.0361789	0.051331
765	0.327399	0.304376	0.291813	0.282846			765	0.0404659	0.0403538	0.0363121	0.0511743
766	0.324604	0.294299	0.284224	0.275462			766	0.0348528	0.043637	0.0318086	0.0494546
767	0.320977	0.292056	0.280407	0.263575			767	0.032359	0.0389711	0.0390322	0.0499824
768	0.316635	0.287945	0.275389	0.259792			768	0.0390629	0.0429868	0.0361601	0.0457587
769	0.307877	0.279231	0.265598	0.257881			769	0.0382198	0.03976	0.0315336	0.0489197
770	0.302184	0.276688	0.259987	0.253761			770	0.0425326	0.0431744	0.0306713	0.0494699
771	0.296514	0.27786	0.251644	0.240289			771	0.0367416	0.040563	0.0343416	0.0455893
772	0.293093	0.269752	0.243248	0.238529			772	0.0427637	0.0478228	0.032922	0.0504822
773	0.280907	0.259597	0.244488	0.228336			773	0.0422117	0.0477282	0.0365951	0.0441614
774	0.274355	0.257852	0.230798	0.220148			774	0.03164	0.0433654	0.0357183	0.0442867
775	0.270923	0.249712	0.225572	0.213435			775	0.0341911	0.045324	0.0332286	0.0444439
776	0.267806	0.245818	0.215886	0.210914			776	0.037199	0.0423398	0.0266297	0.0455737
777	0.261891	0.236407	0.212348	0.203918			777	0.0371016	0.0428846	0.0378359	0.0476708
778	0.257395	0.235645	0.210974	0.194496			778	0.0395868	0.0441942	0.0337542	0.0455963
779	0.260039	0.23179	0.203029	0.193899			779	0.0412576	0.0427823	0.0321821	0.0465367
780	0.252743	0.229939	0.20146	0.186398			780	0.0380099	0.0449301	0.0324507	0.0437725
781	0.245337	0.218062	0.193611	0.177926			781	0.0370567	0.0414591	0.0348525	0.0415842
782	0.237598	0.218294	0.195951	0.178212			782	0.0353941	0.0391228	0.036089	0.0467262
783	0.239128	0.214719	0.186826	0.172056			783	0.0323328	0.0402326	0.0334695	0.050518
784	0.230444	0.212916	0.183054	0.169649			784	0.0368801	0.0379632	0.0318525	0.0462055
785	0.227773	0.208864	0.184003	0.168609			785	0.0372546	0.0422025	0.0364402	0.0470912
786	0.229744	0.20687	0.176411	0.159376			786	0.03915	0.0411038	0.032609	0.0369986
787	0.231909	0.199877	0.174691	0.164806			787	0.0421735	0.0405567	0.0308369	0.0507337
788	0.22567	0.202011	0.18024	0.159484			788	0.0376833	0.0399192	0.0332201	0.0466051
789	0.224511	0.198738	0.174073	0.15765			789	0.0414548	0.0417419	0.030936	0.0450743
790	0.22186	0.20068	0.165399	0.158711			790	0.0406845	0.041026	0.0302873	0.0457964
791	0.220299	0.197763	0.167664	0.156504			791	0.036697	0.0392915	0.0315743	0.0457149
792	0.214314	0.19473	0.163565	0.149898			792	0.0323865	0.0377182	0.0298747	0.0441588
793	0.217477	0.192772	0.162898	0.151311			793	0.041077	0.0471209	0.0298615	0.0451677
794	0.210276	0.184536	0.159768	0.145705			794	0.0359966	0.0378175	0.0311402	0.0436882
795	0.209136	0.181714	0.157903	0.148032			795	0.0377795	0.0368964	0.0294347	0.0508298
796	0.20556	0.181938	0.159015	0.145145			796	0.0343721	0.037094	0.0320361	0.0412287
797	0.208844	0.186178	0.15698	0.145493			797	0.0429333	0.0403262	0.0323852	0.0420554
798	0.201466	0.181307	0.153959	0.141419			798	0.0335041	0.0433312	0.0307719	0.0458815
799	0.201062	0.186126	0.150561	0.137876			799	0.0330371	0.0421978	0.0296485	0.0419265
800	0.198	0.17597	0.155085	0.137514			800	0.0334535	0.0361383	0.0330331	0.0411257

## Sheet: Fig_7_source data_LL50
locus_tag	new_locus_tag	gene	baseMean	log2FoldChange	lfcSE	stat	pvalue	padj	significance
slr1728	SGL_RS08865	kdpA	151849	-5.54552	0.126978	-43.6731	0	0	Down-regulated
slr1729	SGL_RS08870	kdpB	64901.5	-5.05468	0.137792	-36.6835	1.34022e-294	2.43116e-291	Down-regulated
ssr2912	SGL_RS08875		13188.2	-5.01086	0.13835	-36.2187	3.09606e-287	3.74417e-284	Down-regulated
slr1730	SGL_RS08880	kdpC	31995.4	-4.94494	0.146535	-33.7457	1.23493e-249	1.12008e-246	Down-regulated
slr1731	SGL_RS08885	kdpD	9672.99	-4.46608	0.161167	-27.7109	5.15867e-169	3.74313e-166	Down-regulated
sll1590	SGL_RS08860		10968.2	-2.55786	0.0939773	-27.2178	3.99776e-163	2.41731e-160	Down-regulated
sll1286	SGL_RS05150		12730.1	-1.96099	0.0868525	-22.5784	7.06244e-113	3.66036e-110	Down-regulated
sll1583	SGL_RS05200		16359.8	-1.70402	0.0921894	-18.4839	2.78083e-76	1.2611e-73	Down-regulated
slr1437	SGL_RS06855		4205.7	-1.7933	0.105175	-17.0507	3.45576e-65	1.39305e-62	Down-regulated
ssr3383	SGL_RS08590	apcC	108254	-1.78806	0.105529	-16.9437	2.1408e-64	7.76682e-62	Down-regulated
ssr1375	SGL_RS09790		15071.7	-1.7112	0.105505	-16.2192	3.68897e-59	1.21669e-56	Down-regulated
ssl1046	SGL_RS15005		29157.8	-1.47414	0.0913627	-16.135	1.44813e-58	4.37817e-56	Down-regulated
slr0623	SGL_RS15650	trxA	54599.4	-1.27464	0.0837762	-15.2148	2.81984e-52	7.86953e-50	Down-regulated
sll1358	SGL_RS06890		14175.9	-1.33663	0.0882523	-15.1456	8.10583e-52	2.10057e-49	Down-regulated
sll0543	SGL_RS15000		60379.4	-1.42002	0.0947111	-14.9932	8.13896e-51	1.96854e-48	Down-regulated
slr1161	SGL_RS10975		19006.6	-1.76604	0.122654	-14.3985	5.28709e-47	1.19885e-44	Down-regulated
SGL_RS19555			4968.98	-1.48383	0.105622	-14.0485	7.86991e-45	1.58622e-42	Down-regulated
slr1152	SGL_RS10895		17871.7	-1.92651	0.137103	-14.0516	7.53362e-45	1.58622e-42	Down-regulated
sll1592	SGL_RS08855		1626.46	-1.49976	0.11028	-13.5995	4.03111e-42	7.6973e-40	Down-regulated
sll0485	SGL_RS15415		4310.63	-1.27457	0.0966672	-13.1851	1.06915e-39	1.93944e-37	Down-regulated
SGL_RS05335			18500.6	-1.19895	0.0909893	-13.1768	1.1936e-39	2.06208e-37	Down-regulated
sll7070	SGL_RS00960		1839.74	-1.52947	0.118601	-12.896	4.74079e-38	7.818e-36	Down-regulated
slr1162	SGL_RS10980		6043	-1.82065	0.142673	-12.7609	2.70945e-37	4.27386e-35	Down-regulated
slr0708	SGL_RS16295		19470.2	-1.38624	0.110348	-12.5624	3.39922e-36	5.13848e-34	Down-regulated
slr2067	SGL_RS08580	apcA	529618	-1.24546	0.101884	-12.2243	2.30586e-34	3.34627e-32	Down-regulated
SGL_RS19440			5932.75	1.57951	0.129433	12.2033	2.98457e-34	4.16462e-32	Up-regulated
SGL_RS19775			15182.4	-1.4165	0.118684	-11.9351	7.76483e-33	1.04336e-30	Down-regulated
slr1808	SGL_RS07880	hemA	18477.4	-1.39182	0.117192	-11.8765	1.56878e-32	2.03269e-30	Down-regulated
sll1882	SGL_RS10335		5905.74	-1.31744	0.111567	-11.8085	3.52954e-32	4.41557e-30	Down-regulated
sll0180	SGL_RS14655		18812.4	-1.04886	0.0897327	-11.6887	1.45639e-31	1.76126e-29	Down-regulated
sll0997	SGL_RS04840		13129.6	-1.0418	0.0909983	-11.4486	2.38913e-30	2.79605e-28	Down-regulated
slr0244	SGL_RS02540		8480.23	-1.07421	0.094803	-11.331	9.21622e-30	1.04489e-27	Down-regulated
sll7069	SGL_RS00955	csx18	904.188	-1.3972	0.124109	-11.2578	2.12035e-29	2.3311e-27	Down-regulated
slr1986	SGL_RS08585	apcB	378172	-1.05571	0.0942551	-11.2005	4.05256e-29	4.32432e-27	Down-regulated
sll1830	SGL_RS04805		7142.34	-1.32161	0.118511	-11.1518	7.01893e-29	7.27562e-27	Down-regulated
slr1311	SGL_RS01910	psbA2	1.15927e+06	-1.05028	0.0953767	-11.0119	3.34929e-28	3.37534e-26	Down-regulated
slr5112	SGL_RS00530		1217.76	-1.22921	0.112163	-10.9591	6.00754e-28	5.89064e-26	Down-regulated
sll5097	SGL_RS00455		2090.12	-1.13041	0.103233	-10.9502	6.63368e-28	6.33342e-26	Down-regulated
sll1359	SGL_RS06885		5025.29	-0.967973	0.0886949	-10.9135	9.93391e-28	9.24108e-26	Down-regulated
slr1163	SGL_RS10985		1852.39	-1.42929	0.131075	-10.9044	1.09793e-27	9.95826e-26	Down-regulated
slr0737	SGL_RS02435	psaD	246474	-1.01704	0.0943499	-10.7794	4.30639e-27	3.7199e-25	Down-regulated
slr1396	SGL_RS05160		7797.34	-1.53462	0.142353	-10.7803	4.26265e-27	3.7199e-25	Down-regulated
ssl3446	SGL_RS05705		2077.55	1.28134	0.119006	10.767	4.92796e-27	4.15783e-25	Up-regulated
slr0749	SGL_RS17655	chlL	94151.2	-1.15503	0.108625	-10.6332	2.08729e-26	1.72107e-24	Down-regulated
sll1762	SGL_RS07630		8846.95	-1.46912	0.138338	-10.6198	2.40977e-26	1.94281e-24	Down-regulated
sll5042	SGL_RS00190		2597.96	-1.24763	0.117953	-10.5773	3.79645e-26	2.99424e-24	Down-regulated
slr1173	SGL_RS11070		32973.2	-0.950191	0.0905216	-10.4968	8.93165e-26	6.89447e-24	Down-regulated
sll1196	SGL_RS03255	pfkA1	2641.76	-1.37329	0.133506	-10.2864	8.11802e-25	6.13587e-23	Down-regulated
sll0253	SGL_RS08900		10842.3	-1.20506	0.117236	-10.2789	8.77172e-25	6.49465e-23	Down-regulated
slr1957	SGL_RS10175		25613.2	-1.30192	0.12726	-10.2304	1.44934e-24	1.05164e-22	Down-regulated
sll0771	SGL_RS13045	gtr	2825.46	-1.50546	0.147715	-10.1916	2.16131e-24	1.5375e-22	Down-regulated
slr0738	SGL_RS02440	trpE	12700	-0.97214	0.0974428	-9.97653	1.9311e-23	1.34731e-21	Down-regulated
sll0733	SGL_RS17665		889.333	-1.28039	0.129156	-9.91352	3.63611e-23	2.48902e-21	Down-regulated
slr0573	SGL_RS15010		1294.5	-1.14096	0.11886	-9.5992	8.05663e-22	5.41286e-20	Down-regulated
slr0869	SGL_RS08290		1477.39	-0.99453	0.104867	-9.4837	2.45418e-21	1.61886e-19	Down-regulated
sll1184	SGL_RS03350	pbsA1	147555	-0.803072	0.0865505	-9.27865	1.71647e-20	1.11203e-18	Down-regulated
sll1384	SGL_RS10520		20712.3	-0.984374	0.106456	-9.24672	2.31482e-20	1.47336e-18	Down-regulated
slr0439	SGL_RS13780		6806.53	-0.823045	0.0891706	-9.23	2.70632e-20	1.69285e-18	Down-regulated
ssr2806	SGL_RS11155		1185.6	-1.26428	0.138402	-9.13483	6.55122e-20	4.02844e-18	Down-regulated
slr0270	SGL_RS08990		3073.35	0.874081	0.0959599	9.10881	8.32917e-20	5.03637e-18	Up-regulated
sll1429	SGL_RS09240		1861.12	-1.00967	0.111264	-9.07455	1.14144e-19	6.78874e-18	Down-regulated
SGL_RS18725			1370.09	-1.02242	0.11302	-9.04638	1.47782e-19	8.64764e-18	Down-regulated
ssl3769	SGL_RS09155		6466.2	1.13159	0.125705	9.002	2.21643e-19	1.27638e-17	Up-regulated
sml0008	SGL_RS09805	psaJ	166205	-1.00908	0.114069	-8.84626	9.05045e-19	5.13047e-17	Down-regulated
sll2013	SGL_RS07735		16888.4	-1.04558	0.118439	-8.82802	1.06544e-18	5.94678e-17	Down-regulated
sll0819	SGL_RS09810	psaF	1.02934e+06	-1.01137	0.115832	-8.73136	2.5163e-18	1.3832e-16	Down-regulated
ssr0390	SGL_RS02600	psaK1	30432.1	-0.896581	0.104767	-8.55785	1.14997e-17	6.22698e-16	Down-regulated
sll1578	SGL_RS05245	cpcA	1.62975e+06	-0.889651	0.10429	-8.53059	1.45606e-17	7.76852e-16	Down-regulated
sll0542	SGL_RS15030	acsA	6067.29	-0.987388	0.115928	-8.51725	1.63382e-17	8.59057e-16	Down-regulated
sll0830	SGL_RS15140		3865.89	-1.21604	0.142921	-8.50848	1.76231e-17	9.13378e-16	Down-regulated
slr5115	SGL_RS00545	arfB	5043.06	-0.889794	0.105764	-8.41298	3.99722e-17	2.04252e-15	Down-regulated
sll1330	SGL_RS17120		4034.75	-0.7894	0.0939317	-8.40398	4.31606e-17	2.17482e-15	Down-regulated
slr0144	SGL_RS12105		58803.6	-0.950707	0.113794	-8.35463	6.56381e-17	3.26212e-15	Down-regulated
sll1091	SGL_RS11020	chlP	95046.4	-0.860986	0.103236	-8.33999	7.42945e-17	3.64244e-15	Down-regulated
slr0082	SGL_RS15315	rimO	22512.4	0.883889	0.106329	8.31279	9.34769e-17	4.52179e-15	Up-regulated
sll1783	SGL_RS07405		16361.3	-0.873322	0.105744	-8.25882	1.47117e-16	7.02289e-15	Down-regulated
slr1815	SGL_RS07925		5594.05	-0.924939	0.114197	-8.09952	5.51783e-16	2.5665e-14	Down-regulated
slr1992	SGL_RS08615	gpx2	4494.16	0.739406	0.0912842	8.10004	5.494e-16	2.5665e-14	Up-regulated
sll5080	SGL_RS00365		15835	-0.711257	0.088711	-8.01769	1.07757e-15	4.94862e-14	Down-regulated
sll1198	SGL_RS03250	trmD	6858.76	-1.07248	0.134753	-7.95886	1.73636e-15	7.87441e-14	Down-regulated
sll0330	SGL_RS12965		852.899	1.74217	0.219232	7.94667	1.91598e-15	8.58168e-14	Up-regulated
ssl2162	SGL_RS10900		657.099	0.96348	0.121599	7.92345	2.31014e-15	1.02209e-13	Up-regulated
sll1579	SGL_RS05240	cpcC2	393971	-0.937547	0.118868	-7.88731	3.08768e-15	1.34965e-13	Down-regulated
sll1577	SGL_RS05250	cpcB	1.87063e+06	-0.884857	0.113404	-7.80273	6.05821e-15	2.61657e-13	Down-regulated
sll0549	SGL_RS14960		1288.99	0.932886	0.120011	7.77331	7.64633e-15	3.26363e-13	Up-regulated
slr1459	SGL_RS17175	apcF	81221.6	-0.765695	0.0986883	-7.75873	8.57854e-15	3.61895e-13	Down-regulated
slr2052	SGL_RS04665		31796.8	-0.903443	0.116679	-7.74296	9.71307e-15	4.05046e-13	Down-regulated
sll1471	SGL_RS17600	cpcL	35539.3	-0.734608	0.0951549	-7.72012	1.1622e-14	4.79144e-13	Down-regulated
slr0681	SGL_RS03865		8275.42	-1.03686	0.136397	-7.6018	2.92037e-14	1.19046e-12	Down-regulated
slr1322	SGL_RS09635		8778.66	0.730473	0.0976157	7.48315	7.25627e-14	2.92508e-12	Up-regulated
sll1580	SGL_RS05235	cpcC1	441497	-0.907291	0.121324	-7.47826	7.53158e-14	3.0027e-12	Down-regulated
sll1769	SGL_RS07560		2692.33	0.733689	0.0982146	7.47027	8.00302e-14	3.15597e-12	Up-regulated
sll1119	SGL_RS05965		2052.8	-1.25456	0.168545	-7.44346	9.80827e-14	3.82628e-12	Down-regulated
slr1241	SGL_RS06825		1955.02	-0.756886	0.101706	-7.44189	9.92512e-14	3.83068e-12	Down-regulated
slr0753	SGL_RS17685		21325.3	3.72422	0.503361	7.3987	1.3752e-13	5.25183e-12	Up-regulated
sll0376	SGL_RS14490		11897.8	-0.849242	0.11515	-7.37508	1.64246e-13	6.14315e-12	Down-regulated
sll0723	SGL_RS17765		31766.9	0.999536	0.135506	7.3763	1.6275e-13	6.14315e-12	Up-regulated
ssr2061	SGL_RS06795	grxC	2417.39	0.703785	0.0956556	7.35749	1.87394e-13	6.93739e-12	Up-regulated
slr2108	SGL_RS09460		1959.9	-1.12543	0.153284	-7.34211	2.1025e-13	7.70492e-12	Down-regulated
slr5111	SGL_RS00525		3352.41	-1.20231	0.163822	-7.33911	2.15011e-13	7.8006e-12	Down-regulated
sll1763	SGL_RS07625	grrA	1683.7	-0.935425	0.127549	-7.33384	2.23647e-13	8.03358e-12	Down-regulated
slr0506	SGL_RS15440	por	9878.07	-0.774202	0.10583	-7.31552	2.5638e-13	9.11909e-12	Down-regulated
sll0022	SGL_RS13360		4851.04	-0.704038	0.0962638	-7.31363	2.60023e-13	9.15887e-12	Down-regulated
sll6059	SGL_RS01640		1967.63	-0.805672	0.110444	-7.29487	2.98937e-13	1.04283e-11	Down-regulated
sll2012	SGL_RS07740	sigD	7778.35	0.696581	0.0955151	7.29288	3.03392e-13	1.04829e-11	Up-regulated
sll0441	SGL_RS18010		5802.26	-0.712934	0.0978343	-7.28716	3.16566e-13	1.08349e-11	Down-regulated
sll5132	SGL_RS00005		2052.07	-0.75085	0.103156	-7.27875	3.3692e-13	1.14238e-11	Down-regulated
ssl0563	SGL_RS12620	psaC	304052	-0.695329	0.0958238	-7.25633	3.9772e-13	1.33604e-11	Down-regulated
slr0179	SGL_RS12790		1573.2	-0.839197	0.115744	-7.25046	4.15346e-13	1.38245e-11	Down-regulated
slr5017	SGL_RS00080		1501.21	-0.962918	0.133046	-7.2375	4.57016e-13	1.50732e-11	Down-regulated
sll1483	SGL_RS17545		2900.74	1.28156	0.179256	7.14931	8.72138e-13	2.85056e-11	Up-regulated
slr0293	SGL_RS11955	gcvP	6060.23	-0.769382	0.108435	-7.09535	1.29025e-12	4.17949e-11	Down-regulated
sll1306	SGL_RS07380		27791.3	-0.604251	0.0854373	-7.07245	1.5222e-12	4.8872e-11	Down-regulated
sll1654	SGL_RS03190		3242.65	-0.676774	0.0971553	-6.9659	3.263e-12	1.03844e-10	Down-regulated
sll1541	SGL_RS11470		1354.94	0.766978	0.110241	6.95727	3.46932e-12	1.0945e-10	Up-regulated
sll1533	SGL_RS11545		16363.4	-0.981781	0.141609	-6.93305	4.11856e-12	1.28812e-10	Down-regulated
sll0283	SGL_RS15930		10163.5	-0.892938	0.130309	-6.85246	7.25923e-12	2.25098e-10	Down-regulated
slr1239	SGL_RS06815	pntA	12890.7	-0.726355	0.106081	-6.84715	7.53361e-12	2.31627e-10	Down-regulated
sll0772	SGL_RS13040		1670.84	-0.712232	0.104277	-6.8302	8.4794e-12	2.58515e-10	Down-regulated
slr6050	SGL_RS01600		8558.37	-0.667666	0.098127	-6.8041	1.0168e-11	3.07413e-10	Down-regulated
SGL_RS19135			5495.11	-0.781047	0.114877	-6.79897	1.05368e-11	3.15931e-10	Down-regulated
sll1469	SGL_RS06415		2540.64	-0.730661	0.107568	-6.79256	1.10161e-11	3.27593e-10	Down-regulated
sll0573	SGL_RS18255	arcC	1757.92	1.13131	0.167513	6.75353	1.44288e-11	4.25591e-10	Up-regulated
slr0750	SGL_RS17660	chlN	22944.1	-0.587404	0.0872809	-6.73004	1.69618e-11	4.9627e-10	Down-regulated
ssr5121	SGL_RS00570		4185.75	-0.782142	0.116363	-6.72157	1.79778e-11	5.21787e-10	Down-regulated
sll0944	SGL_RS12530		2317.05	-0.933488	0.139876	-6.6737	2.49434e-11	7.1821e-10	Down-regulated
slr0787	SGL_RS16030		576.49	0.824088	0.12433	6.62822	3.39767e-11	9.70609e-10	Up-regulated
slr0199	SGL_RS14605	egtC	582.767	0.855802	0.129246	6.62149	3.55595e-11	1.00789e-09	Up-regulated
sll1784	SGL_RS07400		25113.2	-0.677248	0.103522	-6.54209	6.06658e-11	1.70617e-09	Down-regulated
sll1752	SGL_RS04445		1322.46	0.798467	0.124563	6.41017	1.45361e-10	4.05669e-09	Up-regulated
sll5128	SGL_RS00605		27794.6	-0.862551	0.135036	-6.38754	1.68578e-10	4.66871e-09	Down-regulated
sll1085	SGL_RS11080	glpD	1250.54	0.857012	0.134361	6.37842	1.78924e-10	4.91769e-09	Up-regulated
sll1566	SGL_RS11085	ggpS	3133.43	0.837962	0.131673	6.36394	1.96641e-10	5.364e-09	Up-regulated
sll1785	SGL_RS07395		23369	-0.70813	0.111392	-6.3571	2.056e-10	5.56654e-09	Down-regulated
SGL_RS19905			215.93	-1.15517	0.181984	-6.34765	2.18623e-10	5.87529e-09	Down-regulated
SGL_RS18710			174658	-0.756229	0.11935	-6.33625	2.35419e-10	6.28014e-09	Down-regulated
slr1463	SGL_RS17200	fusA	29329.5	-0.587223	0.0941433	-6.23754	4.44508e-10	1.17714e-08	Down-regulated
slr1238	SGL_RS06800	gshB	5621.43	0.61889	0.0998398	6.19884	5.68819e-10	1.49542e-08	Up-regulated
slr1056	SGL_RS04280		4701.08	-0.555583	0.089749	-6.19041	6.00096e-10	1.56629e-08	Not Significant
sll1927	SGL_RS05330		7522.96	-0.571469	0.0923972	-6.18491	6.21366e-10	1.61022e-08	Not Significant
slr1655	SGL_RS17820	psaL	284594	-0.599101	0.0968925	-6.18315	6.28345e-10	1.61676e-08	Down-regulated
sll0038	SGL_RS16500		13097.8	-0.530554	0.0859489	-6.1729	6.70474e-10	1.71301e-08	Not Significant
slr0709	SGL_RS16325		1431.75	-0.75962	0.12562	-6.04697	1.47594e-09	3.74455e-08	Down-regulated
slr6097	SGL_RS01815		2650.33	-0.793061	0.131764	-6.01878	1.75732e-09	4.42746e-08	Down-regulated
sll0247	SGL_RS08965		714.282	-0.780731	0.129885	-6.01093	1.84458e-09	4.61525e-08	Down-regulated
ssr0693	SGL_RS14455		5416.68	-0.785345	0.13083	-6.00278	1.93967e-09	4.81995e-08	Down-regulated
slr1325	SGL_RS09660	spoT	18724.5	-0.588482	0.098372	-5.98221	2.20127e-09	5.4328e-08	Down-regulated
sll1515	SGL_RS04030		128220	0.64626	0.10814	5.97613	2.28502e-09	5.60138e-08	Up-regulated
sll0494	SGL_RS16790		2264.35	-0.657664	0.110631	-5.94464	2.77067e-09	6.74631e-08	Down-regulated
slr0772	SGL_RS13030	chlB	64746.7	-0.86971	0.146346	-5.94284	2.80134e-09	6.77552e-08	Down-regulated
slr0899	SGL_RS14780	cynS	1857.94	0.732871	0.123374	5.94024	2.846e-09	6.83794e-08	Up-regulated
slr1240	SGL_RS06820		3910.37	-0.558424	0.0942688	-5.92374	3.14705e-09	7.51151e-08	Not Significant
slr6071	SGL_RS01695		69.5604	-2.01088	0.340881	-5.89907	3.65562e-09	8.66836e-08	Down-regulated
slr6104	SGL_RS01845		1005.83	-0.688899	0.117078	-5.88411	4.00193e-09	9.42792e-08	Down-regulated
slr0009	SGL_RS13415	cbbL	459976	-0.576189	0.0980954	-5.87376	4.26031e-09	9.97188e-08	Not Significant
slr0232	SGL_RS13665		289.493	1.06906	0.182152	5.86905	4.38294e-09	1.01932e-07	Up-regulated
slr1747	SGL_RS08130		2021.24	0.755265	0.128722	5.86742	4.42628e-09	1.02284e-07	Up-regulated
slr0888	SGL_RS07260		105905	-0.772162	0.132057	-5.84718	4.99979e-09	1.14805e-07	Down-regulated
ssl3093	SGL_RS05230	cpcD	79629.7	-0.999545	0.172532	-5.79339	6.89813e-09	1.57399e-07	Down-regulated
sll0381	SGL_RS14445		6410.56	0.65835	0.114367	5.75647	8.589e-09	1.94756e-07	Up-regulated
slr1604	SGL_RS04115	ftsH3	71475.7	-0.688078	0.121409	-5.66745	1.44942e-08	3.26615e-07	Down-regulated
slr5093	SGL_RS00435		3108.85	-0.699871	0.123535	-5.66539	1.46694e-08	3.28523e-07	Down-regulated
slr7091	SGL_RS01055	csx18	246.122	-1.00025	0.176648	-5.6624	1.49269e-08	3.32238e-07	Down-regulated
slr0870	SGL_RS08295		407.542	-0.799364	0.1419	-5.63327	1.76823e-08	3.91167e-07	Down-regulated
sll1479	SGL_RS17560	pgl	3224.64	-0.651577	0.115882	-5.62276	1.87927e-08	4.13212e-07	Down-regulated
sll1383	SGL_RS10525		1297.39	0.774809	0.137949	5.61665	1.94696e-08	4.25517e-07	Up-regulated
sll0086	SGL_RS15270		3891.57	0.538319	0.095876	5.61474	1.9686e-08	4.2767e-07	Not Significant
sll1003	SGL_RS04300		3375.88	-0.586315	0.104724	-5.59864	2.16039e-08	4.66542e-07	Down-regulated
slr1438	SGL_RS06860		7071.91	-0.644688	0.116161	-5.54995	2.85757e-08	6.13448e-07	Down-regulated
slr6051	SGL_RS01605		510.594	-0.737654	0.132951	-5.5483	2.88458e-08	6.15603e-07	Down-regulated
sll0157	SGL_RS12825		1500.49	0.704477	0.127189	5.53882	3.04523e-08	6.46088e-07	Up-regulated
sll6093	SGL_RS01800		2665.22	-0.681184	0.123149	-5.5314	3.17683e-08	6.70089e-07	Down-regulated
slr0012	SGL_RS13425	cbbS	84210.2	-0.472769	0.0855872	-5.52382	3.31702e-08	6.95616e-07	Not Significant
slr0937	SGL_RS11310		12515.5	-0.51487	0.0934711	-5.50834	3.62241e-08	7.55294e-07	Not Significant
sll1270	SGL_RS07090		12712.5	-0.944148	0.172102	-5.48599	4.11165e-08	8.52403e-07	Down-regulated
sll5083	SGL_RS00385		3672.09	-0.626685	0.11428	-5.48375	4.16414e-08	8.58381e-07	Down-regulated
slr1670	SGL_RS11090		1976.9	0.65612	0.120399	5.44954	5.04989e-08	1.03508e-06	Up-regulated
slr1771	SGL_RS04430		3365.79	0.601978	0.110763	5.43484	5.48447e-08	1.11785e-06	Up-regulated
slr1234	SGL_RS06740		4502.5	-0.539127	0.0992904	-5.4298	5.64164e-08	1.14346e-06	Not Significant
sll1245	SGL_RS10145	cytM	2832.11	0.611304	0.11273	5.42271	5.87023e-08	1.18318e-06	Up-regulated
slr0121	SGL_RS15840		6031.93	-0.481278	0.0889675	-5.40959	6.31684e-08	1.26616e-06	Not Significant
sll1308	SGL_RS07350		2572.06	-0.608537	0.112528	-5.40788	6.37754e-08	1.2713e-06	Down-regulated
ssl5129	SGL_RS00610		890.243	-0.693671	0.128771	-5.38687	7.16937e-08	1.42134e-06	Down-regulated
slr1608	SGL_RS04175		983.217	0.707048	0.131896	5.36063	8.29341e-08	1.63524e-06	Up-regulated
slr1350	SGL_RS10130	desA	12664.4	-0.661841	0.124497	-5.31612	1.06005e-07	2.07884e-06	Down-regulated
slr0914	SGL_RS14850		6270.43	-0.639562	0.121125	-5.28017	1.29063e-07	2.51741e-06	Down-regulated
SGL_RS07555			1126.73	0.577798	0.109541	5.27474	1.32946e-07	2.57929e-06	Not Significant
sll1723	SGL_RS06330		134.147	1.39204	0.264601	5.26091	1.43348e-07	2.76631e-06	Up-regulated
sll6060	SGL_RS01645		585.652	-0.683126	0.130568	-5.23197	1.67715e-07	3.21941e-06	Down-regulated
slr5024	SGL_RS00115		1823.85	-0.609619	0.117689	-5.17993	2.21974e-07	4.23854e-06	Down-regulated
slr0294	SGL_RS11960		996.235	-0.569017	0.110215	-5.16278	2.4331e-07	4.62162e-06	Not Significant
sll1878	SGL_RS10355		5508.46	0.482925	0.0941105	5.13146	2.87496e-07	5.43248e-06	Not Significant
slr0161	SGL_RS12210		32559.1	-0.553609	0.108034	-5.12439	2.9851e-07	5.61137e-06	Not Significant
slr1277	SGL_RS10700		107233	-0.553774	0.108238	-5.11626	3.11657e-07	5.78691e-06	Not Significant
ssr2831	SGL_RS11240	psaE	46290.4	-0.546372	0.106804	-5.11564	3.12682e-07	5.78691e-06	Not Significant
sll0685	SGL_RS14175		1743.2	0.600913	0.117458	5.116	3.12085e-07	5.78691e-06	Up-regulated
ssl6092	SGL_RS01795		1108.01	-0.549841	0.107502	-5.11471	3.14229e-07	5.78691e-06	Not Significant
sll5061	SGL_RS00280		5134.02	-0.659348	0.129218	-5.1026	3.35019e-07	6.13863e-06	Down-regulated
slr0710	SGL_RS16330	gdhA	6761.41	-0.535249	0.105794	-5.05935	4.2068e-07	7.66948e-06	Not Significant
slr1254	SGL_RS08440	pds	4557.64	0.501797	0.0996861	5.03377	4.80938e-07	8.72421e-06	Not Significant
SGL_RS19575			2275.5	-0.641737	0.127631	-5.02807	4.9544e-07	8.94258e-06	Down-regulated
slr0333	SGL_RS12630		4474.05	-0.643274	0.128695	-4.99845	5.77937e-07	1.03498e-05	Down-regulated
sll5076	SGL_RS00345		917.606	-0.591508	0.118348	-4.99806	5.79111e-07	1.03498e-05	Down-regulated
sll0710	SGL_RS02320		5239.08	-0.536671	0.10748	-4.99323	5.93774e-07	1.05599e-05	Not Significant
smr0004	SGL_RS17825	psaI	53270.9	-0.558667	0.112433	-4.96887	6.73431e-07	1.19181e-05	Not Significant
ssl2501	SGL_RS07095	phaP	55976.1	0.481924	0.0973026	4.95284	7.31398e-07	1.28811e-05	Not Significant
sll1092	SGL_RS11010		2152.56	-0.510526	0.103221	-4.94593	7.57797e-07	1.32816e-05	Not Significant
slr0468	SGL_RS14005		1690.57	-0.564523	0.114163	-4.94488	7.61924e-07	1.32897e-05	Not Significant
slr1232	SGL_RS06720		5714.08	-0.593995	0.120478	-4.93032	8.20965e-07	1.4251e-05	Down-regulated
slr0399	SGL_RS12020		3331.91	0.605426	0.122973	4.92326	8.51134e-07	1.47044e-05	Up-regulated
sll6098	SGL_RS01820		4105.22	-0.507267	0.103097	-4.92028	8.64185e-07	1.48591e-05	Not Significant
slr0739	SGL_RS02445		2763.99	-0.500409	0.101994	-4.90628	9.2819e-07	1.58843e-05	Not Significant
slr2118	SGL_RS09530		325.028	-0.728136	0.148458	-4.90465	9.35926e-07	1.59415e-05	Down-regulated
sll1382	SGL_RS10530		3790.68	0.458103	0.0936696	4.89062	1.00517e-06	1.7041e-05	Not Significant
sll1028	SGL_RS02885	ccmK2	12570.7	-0.539809	0.110867	-4.86899	1.12172e-06	1.88627e-05	Not Significant
SGL_RS11050			1791.7	0.531639	0.109194	4.86876	1.12303e-06	1.88627e-05	Not Significant
sll1475	SGL_RS17580		1534.71	-0.547083	0.113081	-4.83798	1.31163e-06	2.1929e-05	Not Significant
slr0011	SGL_RS13420	rbcX	163261	-0.438668	0.0909647	-4.8224	1.41844e-06	2.3606e-05	Not Significant
slr5018	SGL_RS00085		1209.36	-0.633268	0.131526	-4.81478	1.47362e-06	2.44124e-05	Down-regulated
slr0912	SGL_RS14840		7500.19	-0.508575	0.105783	-4.80774	1.52644e-06	2.50584e-05	Not Significant
slr5126	SGL_RS00595		8756.69	-0.546434	0.113641	-4.80842	1.52126e-06	2.50584e-05	Not Significant
slr0587	SGL_RS18205		9534.59	-0.735784	0.153075	-4.80669	1.53451e-06	2.50775e-05	Down-regulated
sll0686	SGL_RS14170		704.282	0.633765	0.131916	4.80431	1.55286e-06	2.52635e-05	Up-regulated
sll1307	SGL_RS07375		14720.2	-0.445418	0.0927405	-4.80284	1.56429e-06	2.53359e-05	Not Significant
slr1739	SGL_RS08090	psb28	2449.7	0.647253	0.134852	4.79971	1.58895e-06	2.56209e-05	Up-regulated
slr2117	SGL_RS09520		889.029	-0.533545	0.111198	-4.79815	1.60134e-06	2.57065e-05	Not Significant
sll1305	SGL_RS07385		6850.99	-0.486995	0.101541	-4.79606	1.61814e-06	2.58618e-05	Not Significant
sll1304	SGL_RS07390		9161.43	-0.505413	0.105403	-4.79507	1.62621e-06	2.58768e-05	Not Significant
sll1030	SGL_RS02880	ccmL	7779.22	-0.557135	0.116313	-4.78998	1.66795e-06	2.6425e-05	Not Significant
sll0444	SGL_RS17990		1766.33	-0.527339	0.110459	-4.77405	1.80554e-06	2.84804e-05	Not Significant
sll1473	SGL_RS17590		1736.52	-0.532768	0.11208	-4.75346	1.99966e-06	3.13489e-05	Not Significant
ssl5039	SGL_RS00175		1537.24	-0.576584	0.121311	-4.75295	2.00467e-06	3.13489e-05	Not Significant
slr0228	SGL_RS13625	ftsH2	49111.2	-0.531539	0.112307	-4.73293	2.21301e-06	3.44584e-05	Not Significant
slr7024	SGL_RS00720		9242.08	-0.544042	0.115204	-4.72242	2.3306e-06	3.61342e-05	Not Significant
slr0701	SGL_RS16225		429.877	-0.727191	0.154126	-4.71817	2.37974e-06	3.67391e-05	Down-regulated
slr5087	SGL_RS00405		853.562	-0.641099	0.136286	-4.70406	2.55038e-06	3.92067e-05	Down-regulated
slr6012	SGL_RS01425		47.4632	-1.92739	0.413074	-4.66597	3.07159e-06	4.702e-05	Down-regulated
sll0293	SGL_RS12665		4286.77	0.519655	0.111446	4.66285	3.11853e-06	4.7538e-05	Not Significant
sll1031	SGL_RS02875	ccmM	17034.8	-0.479417	0.102973	-4.65577	3.22778e-06	4.88408e-05	Not Significant
slr1198	SGL_RS06000		64577.2	-0.38735	0.0832015	-4.65557	3.23092e-06	4.88408e-05	Not Significant
slr7057	SGL_RS00900		4453.05	-0.538978	0.116315	-4.63379	3.5903e-06	5.40482e-05	Not Significant
sll1708	SGL_RS07850		1325	-0.730319	0.157828	-4.62731	3.70446e-06	5.55364e-05	Down-regulated
sll5086	SGL_RS00400		1615.92	-0.548065	0.118665	-4.61858	3.86369e-06	5.76851e-05	Not Significant
slr6102	SGL_RS01835		5335.78	-0.45801	0.0993523	-4.60996	4.0274e-06	5.98828e-05	Not Significant
slr1869	SGL_RS07510		19231.6	-0.472137	0.102639	-4.59999	4.22517e-06	6.2567e-05	Not Significant
sll1526	SGL_RS11610		26037.9	-0.750787	0.163744	-4.58513	4.53698e-06	6.69113e-05	Down-regulated
sll1317	SGL_RS07315	petA	24088	-0.399413	0.0871449	-4.58332	4.57655e-06	6.72216e-05	Not Significant
ssr1407	SGL_RS15115		993.517	0.558759	0.121991	4.58034	4.6422e-06	6.79108e-05	Not Significant
slr5051	SGL_RS00230		12376.6	-0.460284	0.101005	-4.55705	5.18764e-06	7.55853e-05	Not Significant
sll1130	SGL_RS06775		44504.4	-0.480878	0.105616	-4.5531	5.28616e-06	7.67127e-05	Not Significant
slr6044	SGL_RS01570		4468.88	-0.547336	0.120257	-4.55137	5.32972e-06	7.6731e-05	Not Significant
slr6057	SGL_RS01630		1254.05	-0.597162	0.131198	-4.55162	5.32353e-06	7.6731e-05	Down-regulated
slr2114	SGL_RS09505		472.959	-0.622408	0.136947	-4.54487	5.49683e-06	7.88241e-05	Down-regulated
slr0408	SGL_RS12090		18196.1	-0.419141	0.0922652	-4.54278	5.55162e-06	7.92964e-05	Not Significant
SGL_RS20030			40996.3	-0.530399	0.116813	-4.54057	5.61034e-06	7.98208e-05	Not Significant
slr1705	SGL_RS05285		5865.81	0.642821	0.141917	4.52954	5.91126e-06	8.37737e-05	Up-regulated
slr1788	SGL_RS03025		1143.93	-0.686795	0.152409	-4.50627	6.59774e-06	9.27775e-05	Down-regulated
SGL_RS06830			382.092	-0.778687	0.172797	-4.50636	6.59479e-06	9.27775e-05	Down-regulated
ssl2245	SGL_RS06780		69593.7	-0.402226	0.0894256	-4.49788	6.86335e-06	9.61399e-05	Not Significant
sll5060	SGL_RS00275		4979.66	-0.521421	0.115954	-4.49678	6.89908e-06	9.62687e-05	Not Significant
sll1884	SGL_RS10325		3654.58	0.495403	0.110213	4.49495	6.95849e-06	9.67257e-05	Not Significant
sll1193	SGL_RS03270		8730.03	-0.419428	0.0935877	-4.48165	7.40667e-06	0.000102563	Not Significant
sll1702	SGL_RS07870		2241.99	-0.476533	0.106716	-4.46545	7.99024e-06	0.000110223	Not Significant
sll0443	SGL_RS17995		2469.45	0.452599	0.101927	4.44043	8.97773e-06	0.000123376	Not Significant
slr0075	SGL_RS15255	sufC	5320	-0.433604	0.0977142	-4.43748	9.10201e-06	0.000124224	Not Significant
sll0037	SGL_RS16520	cbiX	4063	0.428531	0.0965741	4.43734	9.10794e-06	0.000124224	Not Significant
slr1105	SGL_RS02825	bibA	17117.2	0.395898	0.0892935	4.43368	9.26389e-06	0.000125878	Not Significant
sll5130	SGL_RS00615		548.363	-0.632567	0.142852	-4.42812	9.50593e-06	0.000128685	Down-regulated
slr1930	SGL_RS12305		2557.95	0.466505	0.105551	4.41971	9.88334e-06	0.000133297	Not Significant
SGL_RS19955			827.7	0.549242	0.124592	4.40832	1.04175e-05	0.00013998	Not Significant
slr1634	SGL_RS11550		1.05743e+06	-0.453481	0.103027	-4.40157	1.07468e-05	0.000143873	Not Significant
sll1102	SGL_RS10915		4641.65	-0.43644	0.0992025	-4.39948	1.08508e-05	0.000144731	Not Significant
sll0683	SGL_RS14185	pstB2	38999.5	0.417615	0.0952448	4.38465	1.1617e-05	0.000153819	Not Significant
slr5127	SGL_RS00600		4456.19	-0.459806	0.104861	-4.38491	1.16033e-05	0.000153819	Not Significant
slr1971	SGL_RS10290		1148.48	0.59376	0.135695	4.37569	1.21047e-05	0.000159694	Up-regulated
sll1381	SGL_RS10545		2874.08	0.410006	0.0937836	4.37183	1.2321e-05	0.000161959	Not Significant
slr0452	SGL_RS18015	ilvD	9369.78	-0.448879	0.102786	-4.36713	1.25889e-05	0.000164882	Not Significant
sll1185	SGL_RS03345	hemF	12890.5	-0.485554	0.111429	-4.35753	1.31537e-05	0.000171661	Not Significant
slr0301	SGL_RS15890	ppsA	8790.92	-0.642444	0.147467	-4.35652	1.32148e-05	0.00017184	Down-regulated
slr1963	SGL_RS10230		65069.9	0.525595	0.120741	4.35308	1.34236e-05	0.000173932	Not Significant
sll0947	SGL_RS12505	raiA	93868.9	-0.589412	0.135673	-4.34435	1.39687e-05	0.00018035	Down-regulated
slr5058	SGL_RS00265		6951.83	-0.390806	0.0899876	-4.34288	1.40625e-05	0.000180917	Not Significant
slr1236	SGL_RS06750		1269.24	0.58175	0.134108	4.33791	1.43843e-05	0.000184404	Not Significant
sll0382	SGL_RS14440		755.334	0.536158	0.12368	4.33506	1.45723e-05	0.000186156	Not Significant
slr1285	SGL_RS10760	hik34	2579.43	0.551674	0.128104	4.30647	1.65882e-05	0.00021099	Not Significant
slr1429	SGL_RS17100		2404.66	0.463408	0.107622	4.30588	1.66326e-05	0.00021099	Not Significant
slr2132	SGL_RS07720	pta	3405.59	-0.54965	0.127795	-4.30103	1.70009e-05	0.000214204	Not Significant
slr5078	SGL_RS00355		5651.54	-0.387239	0.0900349	-4.30098	1.70041e-05	0.000214204	Not Significant
sll1439	SGL_RS10840		609.671	-0.64248	0.149518	-4.29701	1.73118e-05	0.000217326	Down-regulated
slr1966	SGL_RS10245		2493.01	-0.4427	0.103182	-4.29047	1.78296e-05	0.000223055	Not Significant
ssl3044	SGL_RS11210		1958.21	0.620713	0.144791	4.28696	1.81136e-05	0.000225829	Up-regulated
sll1468	SGL_RS06460		7391.16	-0.495735	0.115723	-4.28379	1.83735e-05	0.000228284	Not Significant
slr1413	SGL_RS02710		1301.05	0.547764	0.127902	4.2827	1.84638e-05	0.000228624	Not Significant
slr1383	SGL_RS05040		2682.88	0.445023	0.103982	4.27981	1.87055e-05	0.000230829	Not Significant
ssr0109	SGL_RS13865		2449.93	0.445662	0.10427	4.27413	1.91882e-05	0.000235982	Not Significant
sll0184	SGL_RS14610	sigC	4808.94	0.425097	0.0997467	4.26176	2.02819e-05	0.000248591	Not Significant
slr0699	SGL_RS16215		730.501	-0.563431	0.132507	-4.25208	2.11793e-05	0.000258715	Not Significant
SGL_RS19965			2567.39	-0.429097	0.10098	-4.24933	2.14407e-05	0.00026103	Not Significant
slr0517	SGL_RS15520		1534.84	0.531742	0.125255	4.24526	2.18341e-05	0.00026493	Not Significant
slr1834	SGL_RS06305	psaA	2.37614e+06	-0.580088	0.137023	-4.2335	2.30083e-05	0.000278247	Not Significant
sll1472	SGL_RS17595		3498.99	-0.433681	0.10258	-4.22774	2.36047e-05	0.000284511	Not Significant
sll1862	SGL_RS12320		44113.1	1.84537	0.437476	4.21821	2.46247e-05	0.000295822	Up-regulated
sll0622	SGL_RS17340	nadA	1185.82	0.656101	0.155604	4.21647	2.48153e-05	0.000297128	Up-regulated
slr2116	SGL_RS09515		848.586	-0.528611	0.125631	-4.20765	2.5804e-05	0.00030795	Not Significant
slr0354	SGL_RS13290		2648.67	-0.4016	0.0955703	-4.20214	2.64403e-05	0.00031451	Not Significant
slr0927	SGL_RS16825	psbD	643255	-0.39417	0.0939068	-4.19746	2.69926e-05	0.00032003	Not Significant
slr0642	SGL_RS14315		942.09	0.615781	0.146828	4.19389	2.74214e-05	0.000324055	Up-regulated
sll0834	SGL_RS15100	bicA	6102.23	0.46116	0.109992	4.19268	2.75681e-05	0.000324731	Not Significant
slr1200	SGL_RS06010		9774.35	-0.43896	0.104787	-4.18908	2.80087e-05	0.000328853	Not Significant
ssr1562	SGL_RS16855		54634.6	-0.433224	0.10354	-4.18412	2.86269e-05	0.000335028	Not Significant
sll8001	SGL_RS01130		12901.5	-0.534654	0.12796	-4.17827	2.93729e-05	0.000342652	Not Significant
sll5014	SGL_RS00065		129.423	-0.974519	0.233545	-4.17273	3.00972e-05	0.000349976	Down-regulated
slr0103	SGL_RS15705		1672.61	0.492438	0.118218	4.16552	3.10647e-05	0.000360073	Not Significant
sll7006	SGL_RS00655		368.612	-0.637773	0.153354	-4.15884	3.19872e-05	0.000369584	Down-regulated
SGL_RS18440			5.71544e+06	-0.419272	0.10093	-4.15408	3.26595e-05	0.000376154	Not Significant
sll0064	SGL_RS13890		827.814	0.472525	0.113777	4.15307	3.28042e-05	0.000376625	Not Significant
SGL_RS12075			231.949	-0.709808	0.170943	-4.15231	3.29131e-05	0.000376684	Down-regulated
sll6109	SGL_RS01870		1750.85	-0.426535	0.102931	-4.14388	3.41473e-05	0.000389579	Not Significant
sll1396	SGL_RS02085		7515.77	-0.419014	0.10143	-4.13108	3.61067e-05	0.000410643	Not Significant
slr1648	SGL_RS11660		3377.11	0.468806	0.113873	4.11693	3.83958e-05	0.000435313	Not Significant
ssr0349	SGL_RS13545		562.543	0.521733	0.12685	4.11301	3.90535e-05	0.00044139	Not Significant
sll0657	SGL_RS16390	mraY	5104.48	-0.3997	0.0972503	-4.11001	3.95642e-05	0.000445773	Not Significant
sll0424	SGL_RS11760		1097.38	0.551166	0.134378	4.10161	4.10284e-05	0.000460839	Not Significant
sll1643	SGL_RS04360		1567.88	0.494077	0.120654	4.09498	4.22207e-05	0.000472767	Not Significant
SGL_RS10845			255.971	-0.886858	0.216847	-4.08978	4.31776e-05	0.000481995	Down-regulated
sll0680	SGL_RS14200	pstS	146639	0.40948	0.100265	4.08399	4.42696e-05	0.000492669	Not Significant
sll1109	SGL_RS18115		8841.93	-0.414809	0.101692	-4.07909	4.52123e-05	0.000501622	Not Significant
sll0528	SGL_RS16955		11289.7	0.542776	0.133249	4.07339	4.63336e-05	0.000512495	Not Significant
ST6803t24	SGL_RS11770		170.753	0.863812	0.212539	4.06426	4.81859e-05	0.000531363	Up-regulated
slr0334	SGL_RS12635		1849.32	-0.612907	0.151244	-4.05243	5.06887e-05	0.000557269	Down-regulated
slr0786	SGL_RS16015	map	222.042	0.770972	0.190304	4.05126	5.09431e-05	0.000558373	Up-regulated
sll1949	SGL_RS08575		10495	-0.400392	0.0990262	-4.0433	5.27047e-05	0.000575942	Not Significant
sll0525	SGL_RS16965		755.973	0.482711	0.119446	4.04126	5.31644e-05	0.000579221	Not Significant
slr1082	SGL_RS03730		3164.78	0.384475	0.0951788	4.03951	5.35635e-05	0.000581822	Not Significant
slr1419	SGL_RS17010		1089.22	0.444155	0.109994	4.038	5.39087e-05	0.000583824	Not Significant
slr1958	SGL_RS10180		9808.44	-0.565157	0.140346	-4.02689	5.65195e-05	0.000610276	Not Significant
sll1408	SGL_RS01980		575.025	-0.608245	0.15108	-4.02599	5.67353e-05	0.000610789	Down-regulated
slr5023	SGL_RS00110		1976.64	-0.444937	0.111185	-4.00178	6.28664e-05	0.000674791	Not Significant
slr0947	SGL_RS11370		8008.34	0.386384	0.0966499	3.99777	6.3943e-05	0.000684322	Not Significant
slr1894	SGL_RS05855		9798.9	0.343	0.0858555	3.99508	6.46728e-05	0.000688073	Not Significant
sll0681	SGL_RS14195	pstC	112417	0.483271	0.12095	3.99562	6.45252e-05	0.000688073	Not Significant
sll1356	SGL_RS06895	glgP	18591.5	-0.543435	0.136304	-3.98693	6.69331e-05	0.000710039	Not Significant
slr1243	SGL_RS08320		3841.75	-0.46488	0.11673	-3.98254	6.81837e-05	0.000721197	Not Significant
slr6106	SGL_RS01855		98.4585	-1.03157	0.259157	-3.9805	6.87703e-05	0.000725286	Down-regulated
sll0442	SGL_RS18005		814.752	-0.477129	0.120071	-3.97374	7.07541e-05	0.000744046	Not Significant
sll1029	SGL_RS02890	ccmK1	41769	-0.406638	0.102381	-3.9718	7.13307e-05	0.000747942	Not Significant
ssl0438	SGL_RS09050		493.119	-0.638986	0.161103	-3.96631	7.29944e-05	0.000763181	Down-regulated
slr0959	SGL_RS11460		7277.68	0.500541	0.126462	3.95805	7.55656e-05	0.000785536	Not Significant
slr0114	SGL_RS15800		6937.41	-0.346844	0.0876169	-3.95864	7.53771e-05	0.000785536	Not Significant
sll0258	SGL_RS11935	psbV	66361.3	-0.362377	0.0920749	-3.93568	8.29605e-05	0.000859944	Not Significant
sll1734	SGL_RS06285		9664.99	0.464077	0.118487	3.91669	8.97714e-05	0.000927893	Not Significant
sll1441	SGL_RS10825		1092.64	-0.592126	0.151248	-3.91495	9.04238e-05	0.000931981	Down-regulated
smr0005	SGL_RS04090	psaM	9887.42	-0.390529	0.099849	-3.91119	9.18422e-05	0.000943919	Not Significant
slr2071	SGL_RS06120		656.442	0.636754	0.162889	3.90914	9.26262e-05	0.000949288	Up-regulated
slr1547	SGL_RS06490		2531.51	0.587288	0.150401	3.90481	9.43008e-05	0.000963727	Up-regulated
slr0579	SGL_RS15035		2813.54	0.402815	0.103614	3.88766	0.000101216	0.00103149	Not Significant
slr6103	SGL_RS01840		1339.5	-0.439706	0.113263	-3.88218	0.000103524	0.00105205	Not Significant
ssr2067	SGL_RS06835		484.35	-0.532016	0.13707	-3.88134	0.000103885	0.00105277	Not Significant
sll0228	SGL_RS02550	speB1	2291.69	0.408071	0.105342	3.87376	0.000107168	0.00108303	Not Significant
slr0467	SGL_RS14000		1074.34	-0.531192	0.137445	-3.86476	0.000111198	0.00112063	Not Significant
sll0045	SGL_RS16460		2217.7	0.417071	0.107989	3.86215	0.000112395	0.00112955	Not Significant
slr2115	SGL_RS09510		2147.53	-0.534589	0.138677	-3.85493	0.000115763	0.00116018	Not Significant
sll0168	SGL_RS12760		1574.86	0.531323	0.138024	3.84949	0.000118366	0.00118301	Not Significant
sll5081	SGL_RS00370		2214.9	-0.47294	0.123005	-3.84489	0.000120608	0.00119881	Not Significant
sll6076	SGL_RS01720		92.0865	-1.14587	0.297995	-3.84527	0.000120418	0.00119881	Down-regulated
slr0851	SGL_RS08135		1465.58	0.447954	0.116577	3.84257	0.000121755	0.00120691	Not Significant
slr0263	SGL_RS08930		539.914	0.493895	0.128629	3.8397	0.000123186	0.00121116	Not Significant
sll0540	SGL_RS15060		3041.47	0.404841	0.10542	3.84027	0.000122897	0.00121116	Not Significant
slr7068	SGL_RS00950	cas6	1188.17	-0.412017	0.107304	-3.83973	0.000123169	0.00121116	Not Significant
sll0188	SGL_RS14560		5103.92	0.389852	0.101919	3.82511	0.000130713	0.0012817	Not Significant
slr6090	SGL_RS01785		3211.75	-0.366335	0.0958843	-3.82059	0.000133131	0.00130188	Not Significant
slr1495	SGL_RS02075		2502.07	0.365645	0.0959659	3.81015	0.000138882	0.00135447	Not Significant
slr5029	SGL_RS00135		590.86	-0.655394	0.172163	-3.80683	0.000140761	0.00136912	Down-regulated
sll1733	SGL_RS06290		11017.6	0.418492	0.109962	3.80578	0.000141357	0.00137124	Not Significant
slr0388	SGL_RS13010		396.246	0.546455	0.143724	3.80212	0.000143464	0.00138479	Not Significant
SGL_RS18475			4720.17	-0.34827	0.0916012	-3.80203	0.000143517	0.00138479	Not Significant
sll6053	SGL_RS01610		1130.55	-0.422852	0.111241	-3.80122	0.000143985	0.00138562	Not Significant
slr0053	SGL_RS13870	ybeY	7253.64	0.47403	0.124915	3.79483	0.000147742	0.00141801	Not Significant
slr0841	SGL_RS15170		2604.58	0.377815	0.0997931	3.78599	0.000153101	0.00146171	Not Significant
slr0498	SGL_RS15385		1609.8	-0.400547	0.105781	-3.78657	0.00015274	0.00146171	Not Significant
slr1489	SGL_RS02020		707.424	-0.47216	0.124784	-3.78381	0.000154446	0.00146683	Not Significant
sll1665	SGL_RS03120		76352.2	-0.430119	0.113664	-3.78414	0.000154239	0.00146683	Not Significant
sll1632	SGL_RS06620		5088.49	-0.362925	0.095934	-3.78307	0.000154908	0.00146738	Not Significant
slr1276	SGL_RS10695		13666.6	-0.426024	0.112846	-3.77526	0.00015984	0.00151016	Not Significant
slr0236	SGL_RS02485		3599.3	0.389818	0.103313	3.77316	0.00016119	0.00151895	Not Significant
sll5079	SGL_RS00360		4830.9	-0.384021	0.101811	-3.77188	0.00016202	0.00152282	Not Significant
sll1725	SGL_RS06320		702.789	0.513102	0.136279	3.76509	0.000166492	0.00155679	Not Significant
slr1274	SGL_RS10685	pilM	21577.4	-0.445648	0.118363	-3.7651	0.00016648	0.00155679	Not Significant
sll0676	SGL_RS16245		1988.68	-0.422749	0.112381	-3.76175	0.000168729	0.00157154	Not Significant
sll0664	SGL_RS16320		438.753	-0.701288	0.186441	-3.76144	0.000168936	0.00157154	Down-regulated
slr1907	SGL_RS04715		1849.94	0.409022	0.108794	3.7596	0.000170182	0.00157532	Not Significant
sll1732	SGL_RS06295		11358.8	0.396159	0.105392	3.75892	0.000170646	0.00157532	Not Significant
sll1726	SGL_RS06315		321.57	0.58859	0.156566	3.75938	0.000170333	0.00157532	Up-regulated
ssr5009	SGL_RS00040		2893.56	-0.400299	0.10657	-3.7562	0.000172512	0.00158851	Not Significant
sll1968	SGL_RS06130		2881.33	0.378105	0.100869	3.74848	0.00017791	0.00163407	Not Significant
sll5034	SGL_RS00155		20013.9	-0.343786	0.0917571	-3.7467	0.000179175	0.00164153	Not Significant
SGL_RS09450			1844.39	-0.442704	0.118316	-3.74172	0.000182768	0.00167023	Not Significant
ssl1633	SGL_RS18765	hliC	14118.2	0.415191	0.111132	3.73603	0.000186951	0.00170417	Not Significant
slr0018	SGL_RS13465	fumC	1271.31	-0.484602	0.129816	-3.73298	0.000189226	0.00172058	Not Significant
slr0985	SGL_RS03555		1967.15	0.493887	0.132586	3.72505	0.00019528	0.00176677	Not Significant
SGL_RS19830			4761.72	0.573381	0.153916	3.72528	0.000195096	0.00176677	Not Significant
slr5088	SGL_RS00410		1057.89	-0.516878	0.13901	-3.71828	0.000200583	0.00181024	Not Significant
slr1841	SGL_RS06365		1.13415e+06	-0.464124	0.125027	-3.71219	0.000205474	0.00184978	Not Significant
ssl6035	SGL_RS01530		701.042	-0.562973	0.151687	-3.7114	0.000206113	0.00185094	Not Significant
sll1973	SGL_RS09225	plsY	4692.22	-0.369845	0.099761	-3.70731	0.000209474	0.00187648	Not Significant
sll1349	SGL_RS06975		1478.69	-0.384145	0.103716	-3.7038	0.000212392	0.00189793	Not Significant
slr1827	SGL_RS06240		454.747	0.538932	0.145562	3.70241	0.000213559	0.00190367	Not Significant
sll0759	SGL_RS13110		4839.43	0.366796	0.0990892	3.70168	0.00021418	0.00190452	Not Significant
slr0909	SGL_RS14835		8755.82	-0.412279	0.111444	-3.69941	0.0002161	0.00191689	Not Significant
sll5075	SGL_RS00340		2948.15	-0.568	0.153666	-3.69634	0.000218733	0.00193552	Not Significant
sll7075	SGL_RS00985		946.198	-0.50234	0.135974	-3.69438	0.000220423	0.00194573	Not Significant
sll7029	SGL_RS00750		1178.75	-0.436186	0.118559	-3.67907	0.00023409	0.00206135	Not Significant
slr1472	SGL_RS10515		2089.43	0.406005	0.11041	3.67726	0.000235748	0.00207093	Not Significant
slr1147	SGL_RS05630	hik2	2636.59	0.449424	0.122372	3.6726	0.000240094	0.00210029	Not Significant
slr1339	SGL_RS10040		4113.78	-0.391878	0.106708	-3.67244	0.000240248	0.00210029	Not Significant
ST6803t02	SGL_RS03070		605.18	0.466068	0.126952	3.67123	0.000241387	0.00210518	Not Significant
slr1760	SGL_RS04350		457.755	0.679048	0.185228	3.666	0.000246373	0.0021435	Up-regulated
sll0777	SGL_RS16185		1002.43	-0.469283	0.128236	-3.65953	0.000252678	0.0021931	Not Significant
sll1835	SGL_RS04760		3946.28	-0.541811	0.148228	-3.65524	0.000256938	0.00221419	Not Significant
ssr3571	SGL_RS09445		2565.27	-0.393887	0.107759	-3.65527	0.000256915	0.00221419	Not Significant
ssl5113	SGL_RS00535		4805.23	-0.327374	0.0895579	-3.65544	0.000256738	0.00221419	Not Significant
slr0913	SGL_RS14845		4222.5	-0.533617	0.146051	-3.65363	0.000258557	0.00222286	Not Significant
sll0471	SGL_RS15545		1249.75	0.533989	0.146487	3.6453	0.000267077	0.00229068	Not Significant
slr1584	SGL_RS17605		3971.83	-0.385028	0.105845	-3.63764	0.000275143	0.00235429	Not Significant
sll5030	SGL_RS00140		15190.5	-0.338143	0.0932774	-3.62513	0.000288812	0.00246544	Not Significant
sll0410	SGL_RS13715		772.005	0.455464	0.125729	3.62257	0.000291689	0.00247838	Not Significant
sll0679	SGL_RS14205	sphX	12729.1	0.527133	0.145514	3.62257	0.000291694	0.00247838	Not Significant
slr0238	SGL_RS02495		1973.59	-0.454979	0.125783	-3.61717	0.000297845	0.00252472	Not Significant
slr1768	SGL_RS04415		9116.35	-0.333526	0.0923629	-3.61104	0.000304972	0.00257506	Not Significant
slr1681	SGL_RS11175		10447.2	-0.403449	0.111733	-3.61084	0.000305203	0.00257506	Not Significant
slr0379	SGL_RS12945	tmk	2251.53	0.354332	0.0984793	3.59803	0.000320632	0.00269897	Not Significant
SGL_RS14650			595.941	-0.579168	0.161027	-3.59672	0.000322254	0.00270634	Not Significant
slr1019	SGL_RS04830		760.17	0.496406	0.138127	3.59384	0.000325845	0.00273018	Not Significant
slr0878	SGL_RS07165		764.686	0.480734	0.133906	3.59009	0.000330567	0.00276336	Not Significant
slr1673	SGL_RS11100		828.727	0.438758	0.122343	3.58629	0.000335422	0.0027975	Not Significant
SGL_RS19990			132.835	0.899382	0.250857	3.58523	0.00033678	0.00280238	Up-regulated
slr0594	SGL_RS18285		1471.17	0.405792	0.113343	3.5802	0.00034333	0.00285035	Not Significant
sll1292	SGL_RS05090		9566.25	0.408705	0.114265	3.57681	0.000347815	0.00288099	Not Significant
slr1899	SGL_RS05890	ureF	2839.4	0.395662	0.110662	3.57542	0.000349668	0.00288974	Not Significant
sll0191	SGL_RS13675		3639.87	-0.377822	0.105798	-3.57116	0.000355403	0.00293046	Not Significant
slr0083	SGL_RS15320	crhR	44537.6	-0.321803	0.0901635	-3.5691	0.000358204	0.00294686	Not Significant
slr1885	SGL_RS07695	yqeK	2301.63	0.425774	0.11939	3.56626	0.000362119	0.00297232	Not Significant
slr1338	SGL_RS10035		4610.5	-0.448818	0.125913	-3.56451	0.00036454	0.00298544	Not Significant
slr1367	SGL_RS07100		23077.5	0.363876	0.102158	3.56191	0.000368163	0.00300832	Not Significant
slr1129	SGL_RS02280	rne	12891.3	0.433633	0.121899	3.55733	0.000374646	0.00305442	Not Significant
sll0877	SGL_RS07130		3136.85	0.340417	0.0957542	3.55511	0.00037782	0.00307339	Not Significant
sll1272	SGL_RS07075		3840.18	-0.339226	0.0954646	-3.55343	0.000380249	0.00308016	Not Significant
sll0208	SGL_RS13555		26412.9	0.31112	0.0875567	3.55336	0.00038035	0.00308016	Not Significant
SGL_RS09525			264.173	-0.568602	0.160173	-3.54993	0.000385336	0.00311359	Not Significant
slr1767	SGL_RS04395		683.695	0.424298	0.119957	3.53708	0.000404572	0.00326175	Not Significant
ssl5025	SGL_RS00120		1459.26	-0.414704	0.117305	-3.53527	0.000407366	0.00327699	Not Significant
sll0383	SGL_RS14435	cbiM	199.733	0.649451	0.184075	3.5282	0.000418402	0.00335833	Up-regulated
sll1995	SGL_RS09585		1643.93	0.403844	0.11451	3.5267	0.000420776	0.00336992	Not Significant
sll1112	SGL_RS06095	aroQ	4217.35	0.501437	0.142226	3.52564	0.000422467	0.00337601	Not Significant
sll0833	SGL_RS15105		1666.73	0.399067	0.113213	3.52491	0.000423623	0.00337781	Not Significant
sll0818	SGL_RS09835	rsmI	1766.78	0.481744	0.136891	3.51918	0.000432876	0.00344402	Not Significant
slr0292	SGL_RS11945		938.753	0.478336	0.136255	3.51058	0.000447123	0.00354959	Not Significant
slr1748	SGL_RS06605		703.833	0.540036	0.15387	3.50968	0.000448642	0.00355388	Not Significant
ssr2799	SGL_RS11130	rpmA	16997.4	0.336001	0.095804	3.50717	0.000452903	0.00357981	Not Significant
sll0587	SGL_RS15640	pyk1	2961.97	0.331623	0.094595	3.50571	0.000455385	0.0035916	Not Significant
SGL_RS08305			387.493	-0.548204	0.156441	-3.50423	0.000457936	0.00360389	Not Significant
sll1232	SGL_RS09685		934.117	-0.434348	0.124121	-3.4994	0.000466308	0.00366183	Not Significant
slr0014	SGL_RS13435		702.368	0.425738	0.121745	3.49698	0.000470565	0.00368728	Not Significant
slr0789	SGL_RS16040		2229.54	0.568668	0.162693	3.49534	0.000473462	0.00370198	Not Significant
ssl0483	SGL_RS11940		39692.3	-0.342172	0.0980723	-3.48898	0.000484864	0.00378298	Not Significant
slr6101	SGL_RS01830		2907.56	-0.374177	0.107345	-3.48576	0.000490745	0.00382065	Not Significant
slr2031	SGL_RS05510		1625.56	0.406138	0.116579	3.4838	0.000494345	0.00383223	Not Significant
slr1674	SGL_RS11105		7945.64	0.371663	0.106683	3.48382	0.000494311	0.00383223	Not Significant
sll0219	SGL_RS02635	dfa4	1527.22	0.423494	0.121662	3.48091	0.000499716	0.00384858	Not Significant
sll1687	SGL_RS07990		4689.31	0.35724	0.102657	3.47995	0.000501511	0.00384858	Not Significant
slr0852	SGL_RS08140		4691.17	0.331083	0.0951438	3.47982	0.000501758	0.00384858	Not Significant
ssr2554	SGL_RS09380		6544.12	-0.339072	0.0973908	-3.48156	0.000498501	0.00384858	Not Significant
slr1687	SGL_RS11215		1401.16	0.401627	0.115377	3.48099	0.000499567	0.00384858	Not Significant
sll1433	SGL_RS10875	nnr	1371.53	0.407453	0.117177	3.47724	0.000506601	0.00387753	Not Significant
SGL_RS19945			1047.54	-0.470852	0.135485	-3.47531	0.000510268	0.00389737	Not Significant
sll0556	SGL_RS14920		3479.05	0.413021	0.118999	3.4708	0.000518912	0.00395507	Not Significant
slr1683	SGL_RS11190		168.919	-0.717794	0.207188	-3.46446	0.000531292	0.00404094	Down-regulated
slr0108	SGL_RS15760		1073.64	0.403157	0.116501	3.46054	0.00053909	0.00409167	Not Significant
sll1863	SGL_RS12315		8985.66	2.1722	0.628983	3.45351	0.000553345	0.0041911	Up-regulated
sll2001	SGL_RS09430	pepA	1856.86	-0.416589	0.120708	-3.45121	0.000558086	0.004192	Not Significant
ssl3549	SGL_RS10300		10379	-0.341826	0.0990413	-3.45135	0.000557798	0.004192	Not Significant
ST6803t31	SGL_RS13515		783.015	0.428623	0.124192	3.45128	0.000557931	0.004192	Not Significant
slr1562	SGL_RS17425	grxC	1462.33	0.351136	0.10174	3.45129	0.000557906	0.004192	Not Significant
ST6803t35	SGL_RS14925		1088.89	0.372999	0.108149	3.44893	0.000562809	0.00421874	Not Significant
sll1271	SGL_RS07085		3684.11	-0.531454	0.154369	-3.44275	0.000575838	0.00430751	Not Significant
slr6100	SGL_RS01825		122052	-0.411592	0.119596	-3.44152	0.000578456	0.00431819	Not Significant
slr1628	SGL_RS11525		941.28	0.437199	0.12725	3.43575	0.000590919	0.00440216	Not Significant
sll0924	SGL_RS03495		1488.37	0.361326	0.105224	3.43386	0.000595041	0.00442379	Not Significant
ssl0452	SGL_RS09000		1522.63	0.534485	0.155687	3.43306	0.000596804	0.00442782	Not Significant
sll0318	SGL_RS13255		2411.72	-0.355387	0.103691	-3.42736	0.000609477	0.00451262	Not Significant
slr1672	SGL_RS11095	glpK	1711.53	0.386352	0.113139	3.41485	0.000638168	0.00471543	Not Significant
sll7064	SGL_RS00930	csx19	4041.11	0.349134	0.102281	3.41349	0.000641371	0.00472946	Not Significant
sll0654	SGL_RS03830		219775	1.08585	0.318679	3.40735	0.000655978	0.00480786	Up-regulated
slr2099	SGL_RS09195		1778.27	-0.353799	0.103827	-3.40759	0.000655385	0.00480786	Not Significant
sll0682	SGL_RS14190	pstA	37220.5	0.449757	0.131977	3.40784	0.000654796	0.00480786	Not Significant
sll0517	SGL_RS16605	rbpA	138366	0.439365	0.129092	3.40349	0.000665304	0.00486638	Not Significant
slr1100	SGL_RS02800		3035.73	0.387012	0.113737	3.40271	0.000667221	0.00486658	Not Significant
sll7009	SGL_RS00670		392.702	-0.512761	0.150707	-3.40238	0.000668015	0.00486658	Not Significant
sll0428	SGL_RS11700		392.504	-0.585139	0.172179	-3.39844	0.000677714	0.00492734	Down-regulated
sll1323	SGL_RS02690	atpF2	14970	-0.35578	0.104989	-3.38874	0.000702158	0.00508469	Not Significant
sll0309	SGL_RS13345		1581.12	0.436842	0.128904	3.38889	0.000701765	0.00508469	Not Significant
slr1564	SGL_RS17440		14349.4	-0.432666	0.127995	-3.38032	0.000724007	0.00523247	Not Significant
sll0846	SGL_RS08225		6932.04	0.415035	0.122802	3.3797	0.000725661	0.00523399	Not Significant
slr6105	SGL_RS01850		33.7555	-1.30531	0.386337	-3.37867	0.000728367	0.00524309	Down-regulated
slr7012	SGL_RS00685	cas7d	2285.97	-0.385793	0.114293	-3.37546	0.000736914	0.0052941	Not Significant
slr0017	SGL_RS13460	murA	29908.1	-0.388613	0.115322	-3.36982	0.000752183	0.00539312	Not Significant
slr6108	SGL_RS01865		337.326	-0.666199	0.197765	-3.36864	0.000755404	0.00540553	Down-regulated
slr0596	SGL_RS18295		1711.67	0.556719	0.165405	3.3658	0.000763216	0.00545069	Not Significant
sll0687	SGL_RS14165		91.4803	0.953161	0.283348	3.36392	0.000768433	0.00547716	Up-regulated
SGL_RS14730			641.621	-0.421857	0.125609	-3.3585	0.000783659	0.0055664	Not Significant
slr5005	SGL_RS00020		25581.5	-0.322838	0.0961291	-3.35837	0.000784022	0.0055664	Not Significant
slr1835	SGL_RS06310	psaB	2.53698e+06	-0.448925	0.133727	-3.35702	0.000787861	0.00558273	Not Significant
sll0024	SGL_RS13350		4337.21	0.368051	0.109688	3.35543	0.000792407	0.005604	Not Significant
sll1324	SGL_RS02685	atpF	7381	-0.367182	0.10959	-3.3505	0.000806648	0.00569361	Not Significant
slr7011	SGL_RS00680	cas10d	4758.2	-0.338885	0.101165	-3.34984	0.000808587	0.00569622	Not Significant
sll0403	SGL_RS13775		696.546	-0.56829	0.169857	-3.3457	0.000820747	0.00577068	Not Significant
sll1387	SGL_RS10480		3925.45	0.38996	0.116582	3.34495	0.000822976	0.00577516	Not Significant
sll1507	SGL_RS04105		2377.6	0.406672	0.121615	3.34393	0.000825992	0.00578513	Not Significant
SGL_RS19635			51525.6	0.421631	0.12616	3.34204	0.000831653	0.00581356	Not Significant
slr5056	SGL_RS00255		3259.09	-0.324599	0.0972225	-3.33872	0.000841645	0.00587209	Not Significant
slr1227	SGL_RS06695		13237	-0.29017	0.0869474	-3.3373	0.000845965	0.00589091	Not Significant
slr1002	SGL_RS14990		5116.42	-0.34834	0.104469	-3.33439	0.000854861	0.00594144	Not Significant
sll0849	SGL_RS08205	psbD	284326	-0.384357	0.115324	-3.33284	0.000859646	0.00596328	Not Significant
sll2014	SGL_RS07730	sfsA	3574.36	-0.311569	0.0935181	-3.33164	0.000863368	0.00597767	Not Significant
ssr0336	SGL_RS14720		1206.33	-0.350354	0.105252	-3.3287	0.000872515	0.00602949	Not Significant
sll1296	SGL_RS05075		11896.8	0.446325	0.134357	3.32193	0.000893962	0.00616596	Not Significant
sll1103	SGL_RS10910		5532.92	-0.321162	0.0968038	-3.31766	0.000907749	0.00624917	Not Significant
sll1516	SGL_RS04020		3697.82	0.387369	0.116796	3.31664	0.000911079	0.00626022	Not Significant
slr2094	SGL_RS09170	glpX	49572.6	-0.315372	0.0951285	-3.31523	0.000915692	0.00628002	Not Significant
sll0451	SGL_RS17950		827.379	-0.392453	0.118678	-3.30686	0.00094347	0.00645832	Not Significant
slr1293	SGL_RS03235	crtD	121.118	0.718543	0.217343	3.30603	0.000946275	0.00646532	Up-regulated
sll0062	SGL_RS13905		2419.08	0.346448	0.104955	3.30092	0.000963693	0.00657195	Not Significant
slr1544	SGL_RS06475		4566.82	0.432345	0.131105	3.29769	0.000974831	0.00662301	Not Significant
sll1961	SGL_RS08500		4289.91	-0.360292	0.10925	-3.29785	0.000974265	0.00662301	Not Significant
sll1680	SGL_RS02980	msrB	3813.28	0.315174	0.095733	3.29221	0.00099402	0.00674076	Not Significant
sll1154	SGL_RS08385		1895.55	0.407343	0.123752	3.2916	0.000996197	0.00674292	Not Significant
slr1816	SGL_RS07930		11326.3	-0.386917	0.117845	-3.28326	0.00102614	0.00691978	Not Significant
sll5002	SGL_RS00010		5137.93	-0.34575	0.105299	-3.2835	0.00102527	0.00691978	Not Significant
slr0345	SGL_RS13215		5505.53	-0.324387	0.0988332	-3.28217	0.00103012	0.00693372	Not Significant
sll1127	SGL_RS06810	menB	1244.3	-0.33848	0.103339	-3.27543	0.00105502	0.0070882	Not Significant
sll1202	SGL_RS01970		368.51	-0.526783	0.161232	-3.26724	0.00108603	0.00728305	Not Significant
sll5033	SGL_RS00150		17999.8	-0.277175	0.0849035	-3.26458	0.00109626	0.00733804	Not Significant
sll0656	SGL_RS03825		97922.3	1.03041	0.315755	3.26331	0.00110121	0.00735761	Up-regulated
slr1028	SGL_RS04910		61428.8	-0.457172	0.140357	-3.2572	0.00112517	0.00749633	Not Significant
slr0443	SGL_RS11740		785.735	-0.529271	0.162504	-3.25697	0.0011261	0.00749633	Not Significant
slr0335	SGL_RS12650	apcE	373810	-0.341494	0.105007	-3.25212	0.00114547	0.00760671	Not Significant
slr5071	SGL_RS00320		7708.96	0.349131	0.107366	3.25177	0.00114688	0.00760671	Not Significant
slr1077	SGL_RS03690		15807.3	0.302457	0.0931108	3.24835	0.00116075	0.00768439	Not Significant
sll1173	SGL_RS10710		1125.8	-0.349547	0.107624	-3.24785	0.00116282	0.00768439	Not Significant
slr0553	SGL_RS16940	coaE	669.358	0.388593	0.119695	3.24652	0.00116825	0.00770621	Not Significant
sll1945	SGL_RS04515	dxs	21153.5	-0.307813	0.0948754	-3.24439	0.00117701	0.00774988	Not Significant
slr1691	SGL_RS11255	nadE	2952.85	-0.375182	0.115721	-3.24214	0.00118637	0.00779189	Not Significant
ssr5106	SGL_RS00495		382.005	-0.520384	0.160522	-3.24182	0.00118768	0.00779189	Not Significant
sll1514	SGL_RS04040		7709.64	0.541248	0.167365	3.23394	0.00122097	0.0079721	Not Significant
sll1624	SGL_RS08055		4160.53	0.375942	0.116256	3.23375	0.00122174	0.0079721	Not Significant
slr0955	SGL_RS11440	rlmB	5377.53	0.381906	0.118097	3.23383	0.0012214	0.0079721	Not Significant
slr0077	SGL_RS15265	csd	3634.41	-0.312347	0.0966168	-3.23285	0.00122564	0.00798316	Not Significant
sll0181	SGL_RS14640		3246.44	-0.401073	0.124108	-3.23164	0.00123081	0.00800246	Not Significant
slr6043	SGL_RS01565		7899.5	-0.351533	0.10887	-3.22893	0.00124256	0.00806443	Not Significant
sll0189	SGL_RS14555		562.171	0.617345	0.191504	3.22367	0.00126561	0.00819936	Up-regulated
ST6803t19	SGL_RS10470		367.256	0.64652	0.200659	3.22198	0.00127307	0.00821835	Up-regulated
sll0262	SGL_RS11885	des6	26525.7	-0.376294	0.116779	-3.22228	0.00127173	0.00821835	Not Significant
slr5012	SGL_RS00055		2189.62	-0.465688	0.144571	-3.22117	0.0012767	0.0082271	Not Significant
slr5077	SGL_RS00350		8506.92	-0.307019	0.0953513	-3.21987	0.0012825	0.00824987	Not Significant
slr0104	SGL_RS15710		2151.39	0.420571	0.130704	3.21774	0.00129205	0.00829654	Not Significant
slr0076	SGL_RS15260	sufD	8404.98	-0.31303	0.0975793	-3.20796	0.00133682	0.00856886	Not Significant
sll1894	SGL_RS10240	ribAB	2210.55	0.320259	0.0999324	3.20476	0.00135176	0.00864936	Not Significant
SGL_RS19350			166.475	0.641635	0.200394	3.20187	0.0013654	0.00872123	Up-regulated
sll0661	SGL_RS16350		16414.7	-0.411458	0.128529	-3.20128	0.00136819	0.00872369	Not Significant
slr1165	SGL_RS11000	sat	3339.92	-0.309746	0.0967991	-3.19988	0.00137483	0.00875067	Not Significant
slr0635	SGL_RS14270		1344.15	0.329469	0.103097	3.19572	0.00139482	0.00886238	Not Significant
sll1563	SGL_RS11160		6391.4	-0.336134	0.105265	-3.19323	0.00140692	0.0089236	Not Significant
slr1752	SGL_RS06630		7564.85	0.344563	0.108039	3.18926	0.00142638	0.00903128	Not Significant
slr0983	SGL_RS03545	rfbF	6349.91	0.336416	0.10559	3.18606	0.00144225	0.00911585	Not Significant
slr6075	SGL_RS01715		23.921	-1.61315	0.50645	-3.18521	0.00144647	0.00912659	Down-regulated
slr1803	SGL_RS07830		1397.25	0.352773	0.110831	3.18298	0.00145766	0.00916529	Not Significant
slr1983	SGL_RS10415		7917.42	-0.316117	0.0993116	-3.18308	0.00145719	0.00916529	Not Significant
ssl1498	SGL_RS09980		2224.08	0.402139	0.126383	3.1819	0.00146311	0.00917154	Not Significant
sll0590	SGL_RS15615		4985.69	-0.408379	0.128349	-3.18178	0.00146371	0.00917154	Not Significant
ssl1520	SGL_RS09840		637.661	0.400623	0.125941	3.18104	0.00146749	0.00917939	Not Significant
sll5026	SGL_RS00125		2378.49	-0.332835	0.10489	-3.17317	0.00150782	0.00941545	Not Significant
slr2073	SGL_RS06145	sepF	137865	-0.284758	0.0897819	-3.17167	0.00151567	0.00944822	Not Significant
slr1133	SGL_RS05520	argH	5033.91	-0.33688	0.106287	-3.16955	0.00152677	0.00950107	Not Significant
sll7085	SGL_RS01025		2464.41	-0.320754	0.101262	-3.16758	0.00153715	0.00954927	Not Significant
ST6803t15	SGL_RS09115		2696.58	0.434849	0.137398	3.1649	0.00155138	0.00961167	Not Significant
sll0016	SGL_RS13395		1369.1	-0.335684	0.106072	-3.16469	0.00155249	0.00961167	Not Significant
ST6803t04	SGL_RS03370		179.032	0.618195	0.195491	3.16226	0.00156548	0.00967555	Up-regulated
ssl2922	SGL_RS04130		403.901	-0.578781	0.183254	-3.15835	0.00158664	0.00978968	Not Significant
slr1718	SGL_RS08765	comB	3746.7	-0.320677	0.101609	-3.156	0.00159952	0.0098519	Not Significant
slr1690	SGL_RS11250		536.591	-0.444498	0.140864	-3.15551	0.00160216	0.0098519	Not Significant
slr6015	SGL_RS01440		21.6851	-2.24453	0.711601	-3.15419	0.00160942	0.00987984	Down-regulated
sll1380	SGL_RS10550		6203.99	0.357202	0.113303	3.15263	0.00161807	0.00991615	Not Significant
slr2076	SGL_RS06170	groEL1	49017.4	-0.497701	0.158126	-3.1475	0.00164671	0.0100746	Not Significant
sll0684	SGL_RS14180	pstB1	33846.9	0.339984	0.108056	3.14636	0.00165318	0.0100972	Not Significant
sll0851	SGL_RS08200	psbC	447860	-0.358442	0.113983	-3.14471	0.00166254	0.0101373	Not Significant
sll1455	SGL_RS06565		1089.09	-0.429791	0.136766	-3.14252	0.001675	0.0101961	Not Significant
sll0237	SGL_RS09045		479.681	-0.441653	0.140597	-3.14126	0.00168224	0.0102231	Not Significant
sll0224	SGL_RS02570		2052.23	-0.345099	0.110065	-3.13542	0.00171606	0.0104045	Not Significant
slr1732	SGL_RS08005		4037.21	0.344973	0.110035	3.13512	0.00171783	0.0104045	Not Significant
slr1171	SGL_RS11045	gpx1	10490.9	0.284354	0.0907785	3.13239	0.00173387	0.0104841	Not Significant
slr0112	SGL_RS15795		1558.61	0.403796	0.12901	3.12996	0.00174832	0.0105539	Not Significant
slr2018	SGL_RS05420		10939.4	0.327764	0.104887	3.12494	0.00177841	0.0107177	Not Significant
slr0526	SGL_RS16615	panB	776.815	0.417286	0.133595	3.1235	0.00178711	0.0107523	Not Significant
sll7090	SGL_RS01050	cas10	1990.04	-0.371475	0.119177	-3.117	0.00182699	0.010974	Not Significant
slr7025	SGL_RS00725		703.219	-0.405345	0.130141	-3.11466	0.00184159	0.0110435	Not Significant
sll0450	SGL_RS17955		6306.21	0.499032	0.160374	3.11168	0.00186028	0.0111371	Not Significant
slr0618	SGL_RS15620	cobQ	2378.03	0.369163	0.118685	3.11046	0.00186799	0.011157	Not Significant
SGL_RS19330			257.434	-0.506879	0.162974	-3.11018	0.00186975	0.011157	Not Significant
sll1214	SGL_RS01895	acsF1	193564	-0.300331	0.0966641	-3.10696	0.00189022	0.0112606	Not Significant
sll1053	SGL_RS02235		3111.82	0.439973	0.141733	3.10423	0.00190774	0.0113464	Not Significant
slr0801	SGL_RS16160		624.772	-0.380347	0.122642	-3.10128	0.00192688	0.0114094	Not Significant
slr7026	SGL_RS00730		232.674	-0.52797	0.170242	-3.10128	0.00192686	0.0114094	Not Significant
slr5116	SGL_RS00550		1783.95	-0.34507	0.111272	-3.10114	0.00192777	0.0114094	Not Significant
sll0553	SGL_RS14940		2723.65	0.324664	0.104754	3.09929	0.00193984	0.0114621	Not Significant
slr0982	SGL_RS03540		8348.62	0.339367	0.109521	3.09865	0.00194407	0.0114684	Not Significant
slr6058	SGL_RS01635		504.52	-0.397079	0.128303	-3.09486	0.00196908	0.0115971	Not Significant
slr1849	SGL_RS04470		1773.13	0.305734	0.0988896	3.09167	0.00199037	0.0116965	Not Significant
slr6047	SGL_RS01585		3123.85	-0.331038	0.107085	-3.09136	0.00199241	0.0116965	Not Significant
slr1770	SGL_RS04425		14871.4	0.339144	0.10989	3.08621	0.00202729	0.0118821	Not Significant
sll1348	SGL_RS06980	queG	711.752	0.404333	0.131109	3.08394	0.00204277	0.0119535	Not Significant
slr1991	SGL_RS08610		2044.34	0.411348	0.13363	3.07825	0.0020822	0.0121646	Not Significant
slr1385	SGL_RS05055		2823.43	-0.414872	0.134804	-3.0776	0.00208672	0.0121714	Not Significant
sll1037	SGL_RS02835		1862.41	0.323376	0.105195	3.07406	0.00211167	0.0122972	Not Significant
ssr2857	SGL_RS05295		575.209	0.392134	0.127751	3.06951	0.0021441	0.012466	Not Significant
sll0781	SGL_RS16170		3681.12	-0.331638	0.108117	-3.06741	0.00215924	0.0125339	Not Significant
sll0735	SGL_RS17645		10400.5	-0.394423	0.128644	-3.06599	0.00216948	0.0125733	Not Significant
slr2042	SGL_RS04590		519.079	0.451762	0.147459	3.06365	0.00218653	0.0126519	Not Significant
sll1095	SGL_RS10945		265.398	0.526909	0.172368	3.05689	0.00223645	0.0129201	Not Significant
slr5016	SGL_RS00075		903.169	-0.439109	0.143987	-3.04965	0.00229109	0.0132147	Not Significant
slr0732	SGL_RS02385		376.267	-0.645432	0.212118	-3.04279	0.00234392	0.013498	Down-regulated
SGL_RS19420			575.64	0.377845	0.124222	3.04169	0.00235254	0.0135262	Not Significant
slr1263	SGL_RS08495		2300.55	-0.309299	0.101792	-3.03854	0.00237725	0.0136466	Not Significant
slr0868	SGL_RS08285		191.698	-0.870615	0.286884	-3.03473	0.00240751	0.0137985	Down-regulated
SGL_RS19085			776.371	-0.361564	0.119356	-3.02931	0.00245116	0.0140265	Not Significant
sll1027	SGL_RS02895	gltD	12259.6	-0.268625	0.0887208	-3.02776	0.00246374	0.0140542	Not Significant
sll0745	SGL_RS16400	pfkA2	2299.6	0.29562	0.0976219	3.02821	0.00246003	0.0140542	Not Significant
sll0020	SGL_RS13375		50948.8	0.337102	0.111388	3.02638	0.00247503	0.0140743	Not Significant
ssr7036	SGL_RS00790		259.26	-0.530413	0.175247	-3.02666	0.00247273	0.0140743	Not Significant
slr6016	SGL_RS01445		25.1728	-1.46641	0.484745	-3.02512	0.00248538	0.0141111	Down-regulated
sll1294	SGL_RS05080		19918.2	0.383147	0.126854	3.02037	0.00252465	0.014267	Not Significant
sll1721	SGL_RS06345		7872.29	-0.509887	0.168804	-3.02058	0.0025229	0.014267	Not Significant
sll1951	SGL_RS08565		235031	-0.263614	0.0872613	-3.02097	0.00251962	0.014267	Not Significant
slr2038	SGL_RS04570		905.725	-0.413213	0.137094	-3.01408	0.00257761	0.0145436	Not Significant
slr0871	SGL_RS08300		178.865	-0.598076	0.198745	-3.00927	0.00261877	0.0147301	Down-regulated
SGL_RS18485			284.869	-0.482538	0.160341	-3.00945	0.00261721	0.0147301	Not Significant
sll1407	SGL_RS01985		171.931	-0.819984	0.272787	-3.00595	0.00264754	0.0148688	Down-regulated
sll1459	SGL_RS06530	surE	759.288	0.369851	0.123256	3.00067	0.00269386	0.0151056	Not Significant
slr6037	SGL_RS01540	arsl2	1688.11	-0.417065	0.139029	-2.99984	0.00270118	0.0151233	Not Significant
sll0895	SGL_RS16880		1779.95	0.299948	0.100019	2.99893	0.00270932	0.0151455	Not Significant
sll0371	SGL_RS14525		852.617	-0.532057	0.177576	-2.99621	0.00273355	0.0152574	Not Significant
slr0984	SGL_RS03550	rfbG	6684.94	0.370155	0.123604	2.99469	0.00274722	0.0153069	Not Significant
sll1456	SGL_RS06555		3585.17	-0.304458	0.101696	-2.99382	0.00275511	0.0153069	Not Significant
sll1316	SGL_RS07320	petC2	16957.7	-0.291048	0.0972138	-2.99389	0.00275443	0.0153069	Not Significant
slr1852	SGL_RS07410		16990.1	-0.342397	0.114414	-2.99261	0.002766	0.0153069	Not Significant
slr1990	SGL_RS08605		1417.93	0.310791	0.103843	2.9929	0.00276339	0.0153069	Not Significant
slr0207	SGL_RS14670		2879.27	0.311458	0.104082	2.99242	0.00276773	0.0153069	Not Significant
ssr2153	SGL_RS03295		82748.7	1.18158	0.395646	2.98647	0.00282223	0.0155845	Up-regulated
slr0638	SGL_RS14290	glyQ	4522.26	0.274721	0.0921213	2.98217	0.00286215	0.015781	Not Significant
slr0090	SGL_RS15355	hppD	641.388	0.406464	0.136482	2.97816	0.00289983	0.0159645	Not Significant
slr1115	SGL_RS02130		2568.71	0.375983	0.126492	2.97238	0.00295497	0.0162188	Not Significant
slr6056	SGL_RS01625		908.31	-0.350201	0.117817	-2.97242	0.00295465	0.0162188	Not Significant
sll1434	SGL_RS10870		14141.6	0.276683	0.0931386	2.97066	0.00297163	0.016272	Not Significant
slr0793	SGL_RS16060		160.132	-0.571179	0.192287	-2.97045	0.00297364	0.016272	Not Significant
slr0523	SGL_RS15560	bioD	2547.87	0.323506	0.108951	2.96929	0.00298487	0.0163089	Not Significant
slr1895	SGL_RS05865		2203.43	0.344552	0.116138	2.96675	0.00300969	0.0164198	Not Significant
sll0578	SGL_RS18210	purK	1211.04	0.350744	0.118448	2.96116	0.00306481	0.0166954	Not Significant
slr6045	SGL_RS01575		556.913	-0.398667	0.134689	-2.95991	0.00307729	0.0167382	Not Significant
sll1766	SGL_RS07610	grrM	7381.75	-0.343956	0.116226	-2.95938	0.00308263	0.0167422	Not Significant
sll0539	SGL_RS15065		1917.97	0.337442	0.114259	2.95331	0.00314384	0.0170491	Not Significant
sll0066	SGL_RS13855		3071.3	0.312416	0.105956	2.94854	0.00319281	0.0172888	Not Significant
sll0843	SGL_RS08245		3066.41	0.310598	0.105404	2.94674	0.00321139	0.0173635	Not Significant
sll1370	SGL_RS10610		2518.11	-0.371798	0.126234	-2.9453	0.00322641	0.0174017	Not Significant
sll0473	SGL_RS15515		5099.5	0.437267	0.14847	2.94514	0.00322804	0.0174017	Not Significant
slr1896	SGL_RS05870		1113.14	0.358934	0.121969	2.94284	0.00325221	0.017506	Not Significant
sll1885	SGL_RS10315		16249.1	-0.282396	0.0961092	-2.93828	0.00330036	0.0177388	Not Significant
sll0892	SGL_RS14880	panD	1194.14	0.319836	0.108947	2.93571	0.00332788	0.0178603	Not Significant
sll1354	SGL_RS06940	recJ	2661.26	0.28601	0.0975969	2.93053	0.00338388	0.018134	Not Significant
sll1293	SGL_RS05085		4561.32	0.41609	0.142173	2.92665	0.00342639	0.0183347	Not Significant
sll0144	SGL_RS12175	pyrH	4576.15	-0.294515	0.100909	-2.91864	0.00351566	0.0187847	Not Significant
slr0226	SGL_RS13615		15530.7	-0.385959	0.132345	-2.91631	0.00354197	0.0188975	Not Significant
slr1980	SGL_RS10375		1730.79	-0.339505	0.116648	-2.91051	0.00360841	0.0192237	Not Significant
sll7030	SGL_RS00755		750.852	-0.363692	0.125019	-2.90909	0.00362484	0.0192829	Not Significant
slr0992	SGL_RS12495	trmL	929.712	0.322266	0.110838	2.90754	0.00364283	0.0193502	Not Significant
slr0971	SGL_RS03430		5409.35	0.282159	0.0970764	2.90657	0.00365417	0.0193821	Not Significant
slr0686	SGL_RS03915		8630.17	-0.389148	0.133912	-2.906	0.00366082	0.019389	Not Significant
sll1118	SGL_RS05990		1888.66	0.315931	0.108753	2.90504	0.00367211	0.0194204	Not Significant
slr0042	SGL_RS16575		616.445	0.418703	0.144192	2.90379	0.0036868	0.0194697	Not Significant
slr0096	SGL_RS15380		1767.42	0.399588	0.137759	2.90063	0.0037241	0.0196381	Not Significant
slr1123	SGL_RS02240	gmk	981.604	0.368251	0.127215	2.89471	0.00379505	0.0199832	Not Significant
smr0003	SGL_RS16365	petM	3929.96	-0.317679	0.109798	-2.8933	0.0038122	0.0200444	Not Significant
slr1130	SGL_RS02285	rnhB	419.169	0.51649	0.178541	2.89283	0.00381784	0.020045	Not Significant
slr0905	SGL_RS14820	bchE	1511.59	0.315469	0.109235	2.88798	0.00387727	0.0203276	Not Significant
slr1085	SGL_RS03745		5964.04	0.366008	0.126834	2.88573	0.00390512	0.0204441	Not Significant
sll0294	SGL_RS12660		2197.34	0.306817	0.106526	2.88022	0.00397403	0.0207749	Not Significant
slr1887	SGL_RS07710	hemC	7536.17	-0.276498	0.0960264	-2.87939	0.00398439	0.0207991	Not Significant
slr1450	SGL_RS06965		1433.05	0.369435	0.128384	2.87758	0.00400742	0.0208893	Not Significant
slr0050	SGL_RS13815	rnz	3243.06	0.303786	0.105695	2.87417	0.00405091	0.0210857	Not Significant
sll1186	SGL_RS03340		5614.05	-0.306029	0.106553	-2.87209	0.00407771	0.0211947	Not Significant
sll0083	SGL_RS15285	gmhA	14815.5	-0.274424	0.0956001	-2.87054	0.00409769	0.0212681	Not Significant
sll0217	SGL_RS02645	dfa2	1093.59	0.34073	0.118859	2.86667	0.00414809	0.021499	Not Significant
slr1746	SGL_RS08125	murI	32374.1	-0.265499	0.0930452	-2.85344	0.0043249	0.0223834	Not Significant
sll1623	SGL_RS08060		796.914	0.345651	0.121203	2.85185	0.00434661	0.0224375	Not Significant
slr0013	SGL_RS13430		5280.52	-0.337933	0.1185	-2.85176	0.00434773	0.0224375	Not Significant
sll5044	SGL_RS00200		637.271	-0.363418	0.127474	-2.85091	0.00435939	0.0224657	Not Significant
sll1682	SGL_RS02960	ald	1270.71	-0.345252	0.1212	-2.84861	0.00439105	0.0225968	Not Significant
slr0392	SGL_RS11965		617.716	-0.358109	0.125851	-2.84551	0.00443409	0.0227859	Not Significant
sll1426	SGL_RS09265		3883.93	0.277967	0.0977866	2.84259	0.00447487	0.0229306	Not Significant
slr0344	SGL_RS13210		571.553	-0.420429	0.147889	-2.84287	0.00447096	0.0229306	Not Significant
slr0438	SGL_RS13770		3065.1	-0.313229	0.110329	-2.83904	0.00452493	0.0231544	Not Significant
slr1498	SGL_RS02090	hypD	1283.79	0.347372	0.122461	2.83659	0.00455976	0.0232775	Not Significant
sll1036	SGL_RS02840		2334.01	0.331979	0.11704	2.83645	0.00456182	0.0232775	Not Significant
slr0698	SGL_RS16210		968.296	-0.469684	0.165878	-2.8315	0.00463296	0.0236073	Not Significant
sll5052	SGL_RS00235		3497.79	-0.338541	0.119625	-2.83002	0.00465449	0.0236837	Not Significant
sll0267	SGL_RS11860		11202.1	0.329779	0.116758	2.82447	0.00473583	0.0240639	Not Significant
slr1116	SGL_RS02135		2378.38	0.282349	0.100043	2.82227	0.00476843	0.0241618	Not Significant
slr0743a	SGL_RS02475		9030.46	0.267815	0.0948895	2.82239	0.00476675	0.0241618	Not Significant
slr2051	SGL_RS04660	cpcG	516262	0.238203	0.0845237	2.81818	0.0048296	0.0242357	Not Significant
ssr2315	SGL_RS05035		4445.4	0.319179	0.113182	2.82006	0.00480153	0.0242357	Not Significant
sll1162	SGL_RS08335		1021.42	-0.458187	0.16255	-2.81875	0.00482117	0.0242357	Not Significant
sll1428	SGL_RS09250		2617.17	-0.266168	0.0944303	-2.81867	0.00482223	0.0242357	Not Significant
sll1897	SGL_RS10210		989.557	-0.336706	0.119477	-2.81817	0.00482977	0.0242357	Not Significant
sll1166	SGL_RS10785		2841.63	-0.299254	0.106091	-2.82074	0.00479129	0.0242357	Not Significant
sll7066	SGL_RS00940		7289.33	0.32739	0.116152	2.81864	0.00482274	0.0242357	Not Significant
slr2098	SGL_RS09190		4461.71	0.403173	0.143163	2.81618	0.0048598	0.0243146	Not Significant
sll0426	SGL_RS11750		8781.51	0.297467	0.105642	2.8158	0.00486559	0.0243146	Not Significant
sll6036	SGL_RS01535		1504.85	-0.311234	0.110522	-2.81605	0.00486185	0.0243146	Not Significant
sll0496	SGL_RS16770		2577.62	-0.373844	0.132974	-2.81141	0.00493256	0.0246153	Not Significant
sll1804	SGL_RS05820	rpsC	3246.6	-0.406395	0.144625	-2.80999	0.00495426	0.024625	Not Significant
sll1980	SGL_RS09160	txlA	3129.47	0.30438	0.108322	2.80995	0.00495487	0.024625	Not Significant
ST6803t39	SGL_RS17105		666.489	0.355887	0.12665	2.81	0.00495416	0.024625	Not Significant
sll1032	SGL_RS02870	ccmN	3184.13	-0.282881	0.100688	-2.80949	0.00496202	0.0246268	Not Significant
sll1017	SGL_RS03810		1135.76	-0.316885	0.113014	-2.80395	0.00504807	0.0250197	Not Significant
sll0335	SGL_RS12915		1159.31	-0.359883	0.128416	-2.80249	0.00507103	0.0250992	Not Significant
slr1826	SGL_RS06235		603.522	0.346176	0.123588	2.80106	0.00509349	0.025176	Not Significant
slr6013	SGL_RS01430		5.59786	-3.65768	1.30631	-2.80001	0.00511008	0.0252236	Down-regulated
sll1123	SGL_RS05950		1113.47	0.378259	0.135138	2.79904	0.00512542	0.025265	Not Significant
sll1679	SGL_RS02985	hhoA	1699.96	0.311454	0.111312	2.79802	0.00514166	0.0253106	Not Significant
sll0761	SGL_RS13100		7290.63	0.270023	0.096544	2.79689	0.00515973	0.0253313	Not Significant
ST6803t38	SGL_RS16785		2552.24	0.295688	0.105721	2.79688	0.00515981	0.0253313	Not Significant
ssl2559	SGL_RS05070		424.968	0.412156	0.14739	2.79636	0.00516825	0.0253384	Not Significant
ssl3829	SGL_RS07795		628.373	0.373876	0.133822	2.79384	0.00520868	0.0255022	Not Significant
sll0178	SGL_RS14735		4647.5	-0.288491	0.10332	-2.7922	0.00523503	0.0255966	Not Significant
sll1409	SGL_RS01975		839.594	-0.348945	0.125387	-2.78294	0.00538685	0.0262677	Not Significant
sll1394	SGL_RS02100	msrA1	3825.52	0.318185	0.114352	2.78251	0.005394	0.0262677	Not Significant
slr1046	SGL_RS04220	tatA	1844.98	-0.392996	0.141228	-2.78271	0.00539062	0.0262677	Not Significant
slr1822	SGL_RS08000	nth	430.972	0.377368	0.1357	2.7809	0.00542087	0.0263632	Not Significant
sll0470	SGL_RS15550		17215.5	0.429893	0.154688	2.7791	0.00545092	0.0264738	Not Significant
slr0528	SGL_RS16625	murE	5605.7	-0.274695	0.09891	-2.77723	0.00548252	0.0265917	Not Significant
slr1549	SGL_RS06535	def	4192.8	0.260745	0.0939224	2.77617	0.00550033	0.0266425	Not Significant
ssl3580	SGL_RS10190	hypC	608.514	0.418421	0.150879	2.77323	0.0055503	0.0268487	Not Significant
slr1641	SGL_RS11615	clpB2	6701.84	0.299433	0.108002	2.77247	0.00556334	0.0268759	Not Significant
slr1107	SGL_RS02860		1945.7	0.312762	0.112896	2.77036	0.00559951	0.0269948	Not Significant
sll1755	SGL_RS07705		2469.17	-0.287385	0.103743	-2.77016	0.00560284	0.0269948	Not Significant
sll1342	SGL_RS17045	gap2	85042.5	-0.296306	0.107035	-2.76831	0.00563484	0.027113	Not Significant
slr7092	SGL_RS01060	cas1	284.916	-0.465949	0.168398	-2.76696	0.00565825	0.0271896	Not Significant
slr2017	SGL_RS05415		7383.36	0.359349	0.129989	2.76445	0.00570193	0.0273116	Not Significant
slr1443	SGL_RS06920	spkE	1255.21	0.312556	0.113045	2.76489	0.00569422	0.0273116	Not Significant
SGL_RS07080			589.712	-0.493808	0.178672	-2.76377	0.00571375	0.0273116	Not Significant
slr8030	SGL_RS01275		6011.98	-0.26966	0.0975565	-2.76414	0.00570731	0.0273116	Not Significant
slr0906	SGL_RS14825	psbB	496859	-0.324822	0.117554	-2.76317	0.00572424	0.0273257	Not Significant
sll1664	SGL_RS03125		2869.84	0.304219	0.110136	2.76222	0.00574097	0.0273513	Not Significant
sll7065	SGL_RS00935		5289.31	0.368696	0.133488	2.76201	0.00574467	0.0273513	Not Significant
slr2043	SGL_RS04620		526.265	0.42869	0.15525	2.76128	0.00575746	0.0273762	Not Significant
slr0080	SGL_RS15305	rnhA	2219.34	0.339011	0.123012	2.75591	0.00585288	0.0277935	Not Significant
slr1723	SGL_RS08790		1274.67	-0.317241	0.115139	-2.75529	0.00586396	0.0278098	Not Significant
slr0111	SGL_RS15790		643.382	-0.343524	0.12494	-2.74951	0.00596841	0.0282313	Not Significant
sll0508	SGL_RS16685		1102.63	0.383847	0.139585	2.74991	0.00596115	0.0282313	Not Significant
slr1798	SGL_RS03145		28188.3	-0.348447	0.126846	-2.74701	0.00601415	0.0283905	Not Significant
slr6031	SGL_RS01515		842.02	-0.344464	0.125405	-2.74681	0.00601772	0.0283905	Not Significant
slr6042	SGL_RS01560		3219.64	-0.414323	0.150928	-2.74517	0.00604799	0.0284963	Not Significant
slr7059	SGL_RS00905		2401.75	0.320135	0.116716	2.74285	0.00609087	0.028661	Not Significant
slr1431	SGL_RS17115		10409.2	0.23949	0.0873624	2.74134	0.00611897	0.028756	Not Significant
SGL_RS19675			6752.76	-0.315418	0.115151	-2.73917	0.0061595	0.028909	Not Significant
SGL_RS19500			29246.9	1.66993	0.609853	2.73825	0.00617669	0.0289522	Up-regulated
slr0976	SGL_RS03515		14484.2	0.412625	0.150883	2.73473	0.00624313	0.0292259	Not Significant
slr0746	SGL_RS17630	stpA	2716.87	0.449399	0.164422	2.7332	0.00627221	0.0293242	Not Significant
slr1915	SGL_RS04770		9412.4	0.472255	0.172836	2.73239	0.00628761	0.0293584	Not Significant
sll1767	SGL_RS07595	rpsF	13643.1	-0.300616	0.110136	-2.72949	0.00634323	0.0295042	Not Significant
sll1388	SGL_RS10465		1283.75	0.284005	0.104035	2.72989	0.00633555	0.0295042	Not Significant
slr6039	SGL_RS01545		22354	-0.379125	0.138875	-2.72997	0.0063341	0.0295042	Not Significant
SGL_RS19960			1999.96	0.264869	0.0971589	2.72614	0.00640791	0.0297668	Not Significant
slr1762	SGL_RS04365		935.072	0.336138	0.123435	2.72319	0.00646553	0.0299823	Not Significant
slr5102	SGL_RS00475		894.413	-0.315909	0.116018	-2.72292	0.00647081	0.0299823	Not Significant
slr1689	SGL_RS11245	mutM	1932.13	-0.424793	0.156116	-2.721	0.00650847	0.0301183	Not Significant
slr1926	SGL_RS12285		2786.05	0.329372	0.121068	2.72055	0.00651743	0.0301213	Not Significant
slr0725	SGL_RS02350		114.948	-0.624241	0.229982	-2.7143	0.00664159	0.030605	Down-regulated
sll1869	SGL_RS10425		2888.7	0.283536	0.104453	2.71448	0.00663808	0.030605	Not Significant
slr0602	SGL_RS18335		4295.91	0.256768	0.0946084	2.71401	0.0066474	0.030605	Not Significant
slr1281	SGL_RS10735	dnhJ	6473.04	0.251646	0.0927647	2.71273	0.00667305	0.0306842	Not Significant
sll1360	SGL_RS06875	dnaX	4129.18	0.246975	0.0911047	2.71089	0.00671032	0.0308165	Not Significant
sll0263	SGL_RS11880		2525.43	-0.357279	0.131855	-2.70964	0.00673572	0.0308551	Not Significant
slr0712	SGL_RS16340		1034.4	0.311809	0.11506	2.70997	0.00672896	0.0308551	Not Significant
slr1601	SGL_RS04095		13097.9	-0.283258	0.104583	-2.70845	0.00675977	0.0309262	Not Significant
SGL_RS18940			193.14	-0.499107	0.18438	-2.70694	0.00679057	0.0310279	Not Significant
slr1376	SGL_RS04995		6530.43	0.250633	0.0927093	2.70343	0.00686281	0.0312523	Not Significant
ssr2595	SGL_RS06470	hliB	3877.08	0.397956	0.147244	2.7027	0.00687783	0.0312523	Not Significant
slr1886	SGL_RS07700	rsfS	5628.56	0.318989	0.118036	2.70246	0.00688275	0.0312523	Not Significant
slr1506	SGL_RS09295		24064.5	-0.239459	0.088581	-2.70328	0.00686594	0.0312523	Not Significant
slr1638	SGL_RS11580		10283.3	0.252717	0.093492	2.70309	0.00686979	0.0312523	Not Significant
slr0204	SGL_RS14660		136.337	0.554462	0.205767	2.69461	0.00704706	0.0319584	Not Significant
slr6073	SGL_RS01705		14.0759	-1.87313	0.695762	-2.6922	0.00709818	0.0321501	Down-regulated
sll0649	SGL_RS03885		587.028	0.416095	0.154811	2.68775	0.00719344	0.0325409	Not Significant
sll0792	SGL_RS16095	ziaR	607.407	0.341371	0.12722	2.68331	0.00728978	0.0329357	Not Significant
slr1909	SGL_RS04725		4228.25	-0.263886	0.0984503	-2.68039	0.00735357	0.0331825	Not Significant
ssr0332	SGL_RS14695		1859.12	-0.281895	0.105321	-2.67654	0.00743858	0.0335244	Not Significant
slr1653	SGL_RS17805		1639.23	0.305566	0.114208	2.67553	0.00746119	0.0335846	Not Significant
slr1610	SGL_RS03560		4003.31	0.333232	0.12502	2.66542	0.00768912	0.0345249	Not Significant
sll5104	SGL_RS00485	arsl1	1255.29	-0.418542	0.157021	-2.66552	0.00768686	0.0345249	Not Significant
sll1933	SGL_RS04680	dnaJ2	1351	0.295852	0.111173	2.66117	0.00778691	0.0349208	Not Significant
sll0012	SGL_RS13440		62.802	1.03421	0.388844	2.65971	0.00782074	0.034986	Up-regulated
sll0505	SGL_RS16705	dacA	1208.03	-0.286944	0.107879	-2.65987	0.00781712	0.034986	Not Significant
slr0157	SGL_RS12195		1242.04	-0.283338	0.106625	-2.65732	0.00787642	0.0351917	Not Significant
slr1329	SGL_RS09705	atpD	80413	-0.280724	0.105668	-2.65667	0.00789159	0.0352161	Not Significant
sll1325	SGL_RS02680	atpH	10466.5	-0.260137	0.0981134	-2.6514	0.00801598	0.0357272	Not Significant
SGL_RS14895			1789.91	-0.316081	0.11933	-2.6488	0.00807776	0.0359584	Not Significant
sll1815	SGL_RS05755	adk1	5196.89	0.246119	0.0929721	2.64723	0.00811537	0.0360624	Not Significant
slr1844	SGL_RS06380	uvrA	6464.66	0.255206	0.0964237	2.64671	0.00812779	0.0360624	Not Significant
slr0473	SGL_RS14030	cph1	35440.5	-0.40019	0.15121	-2.64658	0.00813095	0.0360624	Not Significant
slr5054	SGL_RS00245		617.24	-0.371862	0.140627	-2.64431	0.0081857	0.036261	Not Significant
sll7063	SGL_RS00925		25376.1	0.256752	0.0972255	2.64079	0.00827123	0.0365951	Not Significant
sll0036	SGL_RS16525	mgsA	3142.73	0.258325	0.097953	2.63724	0.00835848	0.0368912	Not Significant
sll5084	SGL_RS00390		119.357	-0.630443	0.239022	-2.63759	0.00834974	0.0368912	Down-regulated
sll7106	SGL_RS00625		241.792	-0.575524	0.21828	-2.63663	0.00837352	0.0369127	Not Significant
sll0513	SGL_RS16655		4507.95	-0.289757	0.109919	-2.63608	0.0083869	0.0369268	Not Significant
sll1524	SGL_RS11635		5537.63	-0.256806	0.0974806	-2.63443	0.00842786	0.0370621	Not Significant
slr1863	SGL_RS07465		884.216	-0.419029	0.159203	-2.63204	0.00848732	0.0372784	Not Significant
sll0204	SGL_RS13580	trmFO	2790.07	0.260679	0.0991525	2.62907	0.00856182	0.0375602	Not Significant
slr0418	SGL_RS14420		887.542	0.320985	0.122222	2.62624	0.0086335	0.0378289	Not Significant
sll0459	SGL_RS14040	uvrB	3798.32	0.289787	0.110658	2.61878	0.0088246	0.0386196	Not Significant
sll0608	SGL_RS14310		645.621	0.352262	0.134542	2.61824	0.0088385	0.0386338	Not Significant
sll0198	SGL_RS13620		1388.8	-0.28777	0.110036	-2.61525	0.00891623	0.0389267	Not Significant
ssl3177	SGL_RS06610		7129.22	0.287485	0.110046	2.61241	0.00899064	0.0392044	Not Significant
sll1528	SGL_RS11600		10545.6	-0.278386	0.106608	-2.61131	0.00901953	0.0392831	Not Significant
slr1743	SGL_RS08115	ndbB	1984.95	0.263646	0.101034	2.60949	0.00906767	0.0394454	Not Significant
slr2010	SGL_RS05370		895.095	0.334218	0.128255	2.6059	0.00916335	0.0398139	Not Significant
ST6803t11	SGL_RS06935		753.727	0.333519	0.128076	2.60407	0.00921228	0.0399786	Not Significant
sll1318	SGL_RS02740		601.915	0.371616	0.1428	2.60235	0.00925869	0.040132	Not Significant
slr1951	SGL_RS12480		1774.33	0.273436	0.105144	2.60059	0.00930624	0.04029	Not Significant
slr1379	SGL_RS05010		6804.79	0.339124	0.130556	2.59755	0.00938925	0.0405734	Not Significant
slr1809	SGL_RS07885		3418.32	0.291285	0.112146	2.59737	0.00939406	0.0405734	Not Significant
slr1393	SGL_RS05135		3145.97	0.288824	0.111378	2.59319	0.00950904	0.0410212	Not Significant
sll1647	SGL_RS04335		371.037	0.390621	0.1509	2.5886	0.00963661	0.0415221	Not Significant
sll0445	SGL_RS17985		2887.93	0.330568	0.12775	2.58761	0.00966438	0.0415924	Not Significant
sll0325	SGL_RS13195		1871.74	0.279085	0.107876	2.58709	0.00967903	0.0416061	Not Significant
slr1434	SGL_RS06840	pntB	7430.76	-0.307143	0.118795	-2.58549	0.00972416	0.0417193	Not Significant
sll0289	SGL_RS15865	minD	4678.79	-0.291393	0.11271	-2.58534	0.00972837	0.0417193	Not Significant
ssl2595	SGL_RS07330		1644.68	-0.358187	0.138589	-2.58452	0.00975143	0.0417688	Not Significant
ssr0102	SGL_RS13810	thiS	966.142	0.29931	0.115971	2.5809	0.00985419	0.0421592	Not Significant
slr0581	SGL_RS15050		1502.8	0.480775	0.186607	2.57641	0.00998333	0.0426614	Not Significant
slr1053	SGL_RS04260		2746.62	-0.327284	0.127097	-2.57507	0.0100219	0.0427758	Not Significant
slr0196	SGL_RS14590		230.294	-0.434437	0.168778	-2.57401	0.0100527	0.0428567	Not Significant
slr0962	SGL_RS03365		8732.96	-0.242917	0.0944296	-2.57247	0.0100975	0.0429471	Not Significant
ssl2138	SGL_RS11015		951.678	-0.325122	0.126366	-2.57287	0.0100858	0.0429471	Not Significant
sll0982	SGL_RS04975		1559.66	0.294146	0.114437	2.57038	0.0101586	0.0430529	Not Significant
slr1552	SGL_RS06560		8948.34	-0.392168	0.152524	-2.57118	0.0101351	0.0430529	Not Significant
ST6803t33	SGL_RS14215		352.568	0.419337	0.163161	2.57008	0.0101674	0.0430529	Not Significant
slr6014	SGL_RS01435		7.75843	-2.43355	0.946909	-2.57	0.0101699	0.0430529	Down-regulated
slr0994	SGL_RS12510	lipB	845.894	0.357848	0.139327	2.5684	0.0102168	0.043201	Not Significant
slr0331	SGL_RS12625	ndhD1	55932.1	-0.282087	0.109858	-2.56774	0.0102364	0.0432335	Not Significant
slr1124	SGL_RS02245		3852.54	-0.310619	0.12121	-2.56265	0.0103875	0.0438209	Not Significant
slr7032	SGL_RS00770		583.495	-0.408896	0.15959	-2.56216	0.0104024	0.0438241	Not Significant
ssr6062	SGL_RS01650		60.5805	-0.75983	0.296598	-2.56182	0.0104124	0.0438241	Down-regulated
slr0689	SGL_RS03950		4013.17	0.380535	0.148572	2.56128	0.0104288	0.0438421	Not Significant
slr0359	SGL_RS12855		5259.49	-0.341281	0.13382	-2.55029	0.0107633	0.0451959	Not Significant
slr0829	SGL_RS15095		6810.35	0.234976	0.0922659	2.54672	0.010874	0.0456079	Not Significant
sll0708	SGL_RS02330	rsmA	547.237	-0.340328	0.13386	-2.54242	0.0110088	0.0461199	Not Significant
ssr3570	SGL_RS09440		521.956	-0.371575	0.146215	-2.54129	0.0110446	0.0462165	Not Significant
slr1968	SGL_RS10260		2765.14	0.248849	0.0979431	2.54076	0.0110613	0.0462333	Not Significant
slr1994	SGL_RS08625	phaB	1824.99	0.327338	0.128904	2.53939	0.0111046	0.0463608	Not Significant
slr2033	SGL_RS04520	rub	7058.63	0.256998	0.101257	2.53808	0.0111464	0.0464284	Not Significant
sll0764	SGL_RS13090	urtD	1338.23	-0.375149	0.147795	-2.5383	0.0111393	0.0464284	Not Significant
ssl2542	SGL_RS05130	hliA	1280.07	0.43128	0.169988	2.53712	0.0111767	0.0464657	Not Significant
slr2025	SGL_RS05450		10325.7	-0.240679	0.094868	-2.53699	0.011181	0.0464657	Not Significant
slr1094	SGL_RS02765		859.333	0.354085	0.139704	2.53453	0.0112599	0.04674	Not Significant
sll1709	SGL_RS07840		3623.62	0.228869	0.0905688	2.52702	0.0115035	0.0476967	Not Significant
sll0243	SGL_RS09020		3297.64	-0.255211	0.10107	-2.5251	0.0115666	0.0478503	Not Significant
slr1646	SGL_RS11650	rnc	2536.53	-0.302597	0.119836	-2.52509	0.0115669	0.0478503	Not Significant
SGL_RS05515			4424.94	-0.302386	0.119827	-2.52351	0.0116188	0.0480104	Not Significant
sll1773	SGL_RS07530		3143.37	0.314233	0.124588	2.52218	0.011663	0.0481379	Not Significant
sll0240	SGL_RS09035		374.269	0.355637	0.141066	2.52108	0.0116996	0.0482344	Not Significant
sll1742	SGL_RS06215	nusG	11170.3	0.281333	0.111617	2.52053	0.0117178	0.0482544	Not Significant
sll1596	SGL_RS08830	kaiB2	2264.56	-0.318735	0.126655	-2.51656	0.0118508	0.048747	Not Significant
ssr1765	SGL_RS03695		2919.29	0.262161	0.10423	2.51522	0.0118958	0.0488544	Not Significant
sll1552	SGL_RS17790		3288.64	1.3262	0.52732	2.51498	0.0119039	0.0488544	Up-regulated
slr1390	SGL_RS05110	ftsH1	7597.32	0.284714	0.113317	2.51256	0.0119859	0.0491356	Not Significant
slr1025	SGL_RS04890		136.48	0.647134	0.257742	2.51078	0.0120464	0.0492723	Up-regulated
slr2016	SGL_RS05410		2444.03	0.360206	0.143445	2.51111	0.0120352	0.0492723	Not Significant
slr1042	SGL_RS04200		6267.71	0.267597	0.106597	2.51036	0.0120608	0.0492756	Not Significant
sll1427	SGL_RS09260	hhoB	4111.19	0.276808	0.110347	2.50853	0.0121236	0.0494762	Not Significant
sll1108	SGL_RS18120	surE	3899.26	-0.260267	0.103811	-2.50712	0.012172	0.0496179	Not Significant
sll1987	SGL_RS09095	katG	15918.3	0.281674	0.112451	2.50486	0.0122499	0.0498796	Not Significant
sll0141	SGL_RS12205		1778.95	0.396536	0.158491	2.50195	0.0123512	0.0502355	Not Significant
slr7005	SGL_RS00650		157.816	-0.547202	0.218908	-2.49969	0.0124301	0.0504998	Not Significant
sll1406	SGL_RS01990		1111.9	-0.313299	0.125517	-2.49606	0.012558	0.0509625	Not Significant
slr0019	SGL_RS13475		2050.77	0.315265	0.12638	2.49457	0.0126109	0.0510059	Not Significant
ssl1263	SGL_RS16355		34457.3	-0.297437	0.119211	-2.49504	0.0125942	0.0510059	Not Significant
SGL_RS19530			938.999	-0.364065	0.145939	-2.49464	0.0126085	0.0510059	Not Significant
ssr0759	SGL_RS11725		333.107	0.40096	0.160834	2.493	0.0126668	0.0511748	Not Significant
slr1084	SGL_RS03740		4770.92	0.295945	0.118765	2.49184	0.0127082	0.0512852	Not Significant
slr0312	SGL_RS15965		4302.24	-0.242378	0.0972906	-2.49128	0.0127283	0.0513091	Not Significant
SGL_RS04135			342.698	-0.41501	0.166831	-2.48761	0.0128604	0.0517543	Not Significant
slr0847	SGL_RS15225	coaD	1428.75	0.258106	0.103764	2.48742	0.0128672	0.0517543	Not Significant
slr1536	SGL_RS06425	recQ	4068.45	0.284178	0.114286	2.48655	0.0128988	0.0518236	Not Significant
slr1148	SGL_RS05635		154.383	0.496423	0.199917	2.48315	0.0130228	0.0522062	Not Significant
slr1659	SGL_RS17845		1605.01	-0.270567	0.108947	-2.48348	0.0130107	0.0522062	Not Significant
sll0264	SGL_RS11875		2768.99	0.264537	0.106551	2.48273	0.0130379	0.0522091	Not Significant
slr1505	SGL_RS09275		12143.1	-0.228053	0.0919275	-2.48079	0.0131093	0.052437	Not Significant
slr1212	SGL_RS06075		4129.61	-0.336716	0.136024	-2.47542	0.013308	0.0529401	Not Significant
slr1441	SGL_RS06900		133.757	0.531797	0.214779	2.47602	0.0132857	0.0529401	Not Significant
slr0544	SGL_RS16750		1389.59	0.274951	0.111023	2.47651	0.0132672	0.0529401	Not Significant
sll0493	SGL_RS16795		939.37	-0.337755	0.136365	-2.47683	0.0132554	0.0529401	Not Significant
SGL_RS18150			636.863	0.395115	0.159604	2.47559	0.0133015	0.0529401	Not Significant
slr1819	SGL_RS07970		1116.85	0.328172	0.132608	2.47475	0.0133329	0.0529812	Not Significant
ssr2060	SGL_RS06790		1021.49	0.283735	0.114699	2.47373	0.0133711	0.053075	Not Significant
sll0094	SGL_RS15780		3007.14	0.261405	0.105698	2.47313	0.0133934	0.0531051	Not Significant
sll1178	SGL_RS10645		6870.86	-0.288638	0.116803	-2.47115	0.0134678	0.0533419	Not Significant
slr1289	SGL_RS03210	icd	3648.31	-0.316612	0.128215	-2.46937	0.0135351	0.0535498	Not Significant
sll0063	SGL_RS13900		5433.57	0.257387	0.104292	2.46795	0.013589	0.0537048	Not Significant
slr1318	SGL_RS01940		815.462	-0.300553	0.122146	-2.46061	0.0138702	0.0546926	Not Significant
ssr1499	SGL_RS07270		90.5701	0.668424	0.27169	2.46025	0.0138842	0.0546926	Not Significant
slr0522	SGL_RS15540		1217.34	-0.331275	0.134646	-2.46034	0.0138807	0.0546926	Not Significant
ssr5117	SGL_RS00555		549.519	-0.345677	0.140589	-2.45878	0.013941	0.0548567	Not Significant
sll1595	SGL_RS08835	kaiC2	4223.18	-0.334262	0.136014	-2.45756	0.0139884	0.0549837	Not Significant
sll1041	SGL_RS02745		983.34	0.330729	0.134676	2.45573	0.0140599	0.0552049	Not Significant
sll1562	SGL_RS11165		2322.34	-0.252437	0.102902	-2.45317	0.0141602	0.0555388	Not Significant
slr1442	SGL_RS06915		5938.02	0.2238	0.0913534	2.44983	0.0142925	0.0559372	Not Significant
sll1905	SGL_RS08635		4232.49	0.290556	0.118603	2.44982	0.0142927	0.0559372	Not Significant
sll0072	SGL_RS13820		634.311	-0.310062	0.126637	-2.44844	0.0143477	0.0560921	Not Significant
sll8049	SGL_RS01125		2048.79	-0.261944	0.10709	-2.44603	0.0144441	0.0564081	Not Significant
SGL_RS18840			1341.45	-0.286338	0.117094	-2.44536	0.0144708	0.0564516	Not Significant
slr0615	SGL_RS15595		9560.41	0.295914	0.121068	2.4442	0.0145173	0.0565722	Not Significant
slr1462	SGL_RS17195		1449.65	0.268681	0.109968	2.44327	0.0145548	0.0566574	Not Significant
sll0174	SGL_RS12730		3165.21	0.23461	0.0962296	2.43803	0.0147677	0.0573982	Not Significant
slr8016	SGL_RS01205		615.132	-0.3191	0.130896	-2.43781	0.0147767	0.0573982	Not Significant
sll0703	SGL_RS02390		1021.74	0.267109	0.109616	2.43677	0.014819	0.0575007	Not Significant
slr2103	SGL_RS09215		927.148	0.365907	0.150317	2.43424	0.014923	0.0577808	Not Significant
slr0900	SGL_RS14785	moeA	3014.77	0.353588	0.145241	2.43449	0.014913	0.0577808	Not Significant
slr0607	SGL_RS18370		5076.19	0.422154	0.173463	2.43368	0.0149462	0.0578089	Not Significant
slr1830	SGL_RS06270	phaC	6167.67	0.269787	0.110876	2.43323	0.0149648	0.0578155	Not Significant
sll0108	SGL_RS15695		142679	-0.269386	0.110728	-2.43287	0.0149798	0.0578155	Not Significant
sll1789	SGL_RS05925	rpoC2	35209	0.246484	0.101345	2.43213	0.0150104	0.0578721	Not Significant
ssl2069	SGL_RS02180		280.421	0.404237	0.166662	2.42549	0.0152876	0.0588784	Not Significant
sll1321	SGL_RS02705	atpI	70070.3	-0.289095	0.119525	-2.41869	0.0155765	0.0599276	Not Significant
slr0630	SGL_RS14235		1482.4	0.315996	0.131149	2.40944	0.0159772	0.0614039	Not Significant
slr1897	SGL_RS05880		3570.83	0.2467	0.102409	2.40898	0.0159974	0.0614163	Not Significant
sll0980	SGL_RS04985		2402.09	0.251665	0.104495	2.4084	0.0160228	0.0614273	Not Significant
slr1720	SGL_RS08775	aspS	12023.3	-0.224221	0.0931098	-2.40814	0.0160341	0.0614273	Not Significant
sll1129	SGL_RS06785		2720.89	0.300725	0.124929	2.40717	0.0160768	0.0615261	Not Significant
sll0364	SGL_RS11975		662.36	0.367996	0.152934	2.40624	0.0161177	0.0616174	Not Significant
slr0879	SGL_RS07170	gcvH	1803.76	-0.264049	0.109759	-2.40571	0.016141	0.0616417	Not Significant
sll0576	SGL_RS18235		5713.88	-0.3585	0.149191	-2.40296	0.016263	0.0620421	Not Significant
sll0374	SGL_RS14500	urtE	3744.57	0.271481	0.113021	2.40205	0.0163036	0.0621317	Not Significant
slr0551	SGL_RS16930	rnj	35433.9	0.216747	0.0903111	2.40001	0.0163948	0.0624139	Not Significant
SGL_RS19550			248.836	0.403597	0.168236	2.39899	0.0164404	0.0624926	Not Significant
slr0380	SGL_RS12950		4272.72	0.236941	0.0987758	2.39878	0.0164499	0.0624926	Not Significant
slr0217	SGL_RS13540		8996.03	-0.285421	0.119276	-2.39295	0.0167136	0.0634279	Not Significant
SGL_RS09770			249.355	0.420625	0.176014	2.38973	0.0168608	0.0638529	Not Significant
sll0414	SGL_RS13690		4189.62	-0.268085	0.112177	-2.38983	0.016856	0.0638529	Not Significant
sll0005	SGL_RS13495		9996.31	0.207037	0.0866883	2.38829	0.0169269	0.0640361	Not Significant
slr2119	SGL_RS09535		3752.75	-0.256743	0.107763	-2.38248	0.0171964	0.064988	Not Significant
sll1262	SGL_RS09990	ndhN	6009.15	-0.288358	0.121265	-2.37791	0.0174112	0.0656817	Not Significant
slr1658	SGL_RS17840		2116.21	-0.310324	0.130509	-2.3778	0.0174162	0.0656817	Not Significant
slr1122	SGL_RS02225		4904.84	0.211565	0.0890752	2.37513	0.017543	0.0660228	Not Significant
slr0748	SGL_RS17650		2931.58	-0.243754	0.102619	-2.37533	0.017533	0.0660228	Not Significant
sll1900	SGL_RS10185		1003.29	0.324927	0.13684	2.37451	0.0175722	0.0660642	Not Significant
slr0260	SGL_RS08905	cobO	2817.52	-0.259595	0.109495	-2.37085	0.0177474	0.066589	Not Significant
sll0420	SGL_RS11790	ureB	3560.36	0.236225	0.0996383	2.37082	0.0177485	0.066589	Not Significant
sll0783	SGL_RS16155		1836.23	-0.990974	0.418351	-2.36876	0.0178477	0.0668921	Not Significant
sll0659	SGL_RS16375		3183.39	-0.287644	0.121524	-2.36697	0.0179342	0.0671467	Not Significant
sll0807	SGL_RS09950	rpe	19474.4	-0.211155	0.0892643	-2.3655	0.0180055	0.0673444	Not Significant
slr7100	SGL_RS01100		1078.74	0.278639	0.117857	2.36422	0.0180682	0.0675092	Not Significant
sll1144	SGL_RS06635	rsmH	2197.3	0.238791	0.101081	2.36237	0.0181586	0.0677771	Not Significant
sll0504	SGL_RS16710	lysA	9971.16	-0.238496	0.10108	-2.35949	0.0183002	0.0682354	Not Significant
ssr3184	SGL_RS07660		1177.39	0.327762	0.139075	2.35673	0.0184366	0.0685825	Not Significant
slr0299	SGL_RS15880		769.929	0.278894	0.118353	2.35646	0.01845	0.0685825	Not Significant
ssl2667	SGL_RS17210		16515.1	0.227669	0.0965875	2.35712	0.0184172	0.0685825	Not Significant
slr0495	SGL_RS14125		259.638	0.428419	0.18185	2.35589	0.0184783	0.0686176	Not Significant
slr2088	SGL_RS09105	ilvB	30698.8	-0.246079	0.104521	-2.35434	0.0185554	0.0688333	Not Significant
ssr1256	SGL_RS17715		5205.9	0.247001	0.105021	2.35192	0.0186765	0.069212	Not Significant
slr1596	SGL_RS04025		4804.97	-0.278447	0.118615	-2.34749	0.0189002	0.0699381	Not Significant
sll1932	SGL_RS04685	dnaK3	7809.92	0.22019	0.0938123	2.34713	0.0189185	0.0699381	Not Significant
sll7078	SGL_RS00995		1895.93	-0.298532	0.127203	-2.3469	0.0189303	0.0699381	Not Significant
slr1032	SGL_RS04925		868.342	-0.305595	0.130307	-2.34519	0.0190173	0.0701878	Not Significant
sll0241	SGL_RS09030		1269.42	0.270194	0.115324	2.34291	0.0191339	0.0703877	Not Significant
slr0822	SGL_RS09955		3667.06	0.344777	0.14717	2.34271	0.0191444	0.0703877	Not Significant
SGL_RS12275			16734.4	0.350737	0.14972	2.34262	0.019149	0.0703877	Not Significant
sll0902	SGL_RS16800	argF	4507.64	-0.223675	0.0954676	-2.34294	0.0191326	0.0703877	Not Significant
sll1464	SGL_RS06510	selO	976.37	0.269845	0.115217	2.34207	0.0191772	0.07042	Not Significant
sll1505	SGL_RS04145		211.216	-0.51224	0.218829	-2.34083	0.019241	0.0705827	Not Significant
sll5066	SGL_RS00300		856.553	-0.370109	0.158226	-2.33912	0.0193294	0.0708355	Not Significant
slr1291	SGL_RS03225	ndhD2	17322.4	-0.284563	0.121775	-2.33679	0.0194499	0.0711333	Not Significant
slr1179	SGL_RS18105	anmK	2179.37	0.241914	0.103515	2.337	0.0194392	0.0711333	Not Significant
slr0404	SGL_RS12050		11653.2	0.242896	0.10398	2.33598	0.0194924	0.0712169	Not Significant
slr0667	SGL_RS17370		3387.41	-0.444196	0.190283	-2.3344	0.0195749	0.0714466	Not Significant
slr1315	SGL_RS01925		2043	-0.295006	0.126582	-2.33054	0.0197775	0.0719005	Not Significant
slr2041	SGL_RS04585		1017.3	0.337245	0.14466	2.33129	0.0197379	0.0719005	Not Significant
slr0926	SGL_RS16820	plqA	2842.36	0.25246	0.108328	2.33052	0.0197786	0.0719005	Not Significant
sll1491	SGL_RS17455		5574.91	0.230002	0.0986761	2.33088	0.0197598	0.0719005	Not Significant
sll0721	SGL_RS17780		6686.02	0.27112	0.116399	2.32923	0.0198467	0.072076	Not Significant
slr1735	SGL_RS08035		1080.92	-0.254337	0.109234	-2.32836	0.0198928	0.0721712	Not Significant
sll6054	SGL_RS01615		528.428	-0.30373	0.130615	-2.32539	0.0200513	0.0726735	Not Significant
sll1761	SGL_RS07640		537.33	0.352202	0.15153	2.32431	0.020109	0.0728099	Not Significant
sll1322	SGL_RS02700	atpB	114776	-0.236167	0.101658	-2.32314	0.0201714	0.0728177	Not Significant
slr1537	SGL_RS06430		2455.4	-0.264039	0.113621	-2.32386	0.0201328	0.0728177	Not Significant
sll1531	SGL_RS11590		10124.8	-0.326179	0.140384	-2.32347	0.0201538	0.0728177	Not Significant
slr0453	SGL_RS18020		15631.8	0.315893	0.13601	2.32257	0.0202021	0.0728562	Not Significant
slr1694	SGL_RS11270		7919.86	-0.277457	0.119525	-2.32134	0.0202685	0.0730231	Not Significant
sll1039	SGL_RS02770		1905.39	-0.248552	0.107124	-2.32023	0.0203286	0.0731669	Not Significant
sll1681	SGL_RS02975		945.049	0.322653	0.139114	2.31935	0.0203758	0.0732642	Not Significant
slr1423	SGL_RS17050	murC	8697.32	-0.203455	0.0877649	-2.31818	0.0204396	0.0734207	Not Significant
slr0063	SGL_RS13950		8952.54	0.241111	0.104038	2.31754	0.0204745	0.0734734	Not Significant
ssl1378	SGL_RS17690		1754.06	-0.234301	0.10117	-2.31591	0.0205631	0.0737182	Not Significant
slr0243	SGL_RS02525		861.581	0.312826	0.13517	2.31432	0.0206502	0.0739075	Not Significant
ssr1768	SGL_RS03720		1555.88	0.255504	0.110407	2.3142	0.0206566	0.0739075	Not Significant
slr1507	SGL_RS09305	hpnH	15797.6	-0.197534	0.085398	-2.3131	0.0207169	0.0740502	Not Significant
sll0156	SGL_RS12830		2814.13	0.257926	0.111781	2.30743	0.0210308	0.0750751	Not Significant
slr0650	SGL_RS14370		6229.9	-0.20229	0.0876786	-2.30718	0.021045	0.0750751	Not Significant
sll1614	SGL_RS08700	pma1	934.817	0.26666	0.115655	2.30565	0.0211305	0.0753058	Not Significant
slr0606	SGL_RS18365		10028.8	-0.227411	0.0986542	-2.30513	0.0211591	0.0753339	Not Significant
slr0863	SGL_RS08235		897.131	0.299691	0.130244	2.301	0.0213918	0.0760876	Not Significant
sll0910	SGL_RS11405		2628.51	-0.254339	0.110567	-2.30032	0.0214302	0.0761495	Not Significant
sll0310	SGL_RS13340		118.956	0.514528	0.224098	2.29599	0.0216763	0.0769488	Not Significant
sll1724	SGL_RS06325		279.621	0.372296	0.162317	2.29364	0.0218113	0.0773301	Not Significant
sll0760	SGL_RS13105		27074.1	0.21324	0.0929809	2.29338	0.0218263	0.0773301	Not Significant
slr0209	SGL_RS14685		3710.48	-0.256864	0.11204	-2.29262	0.0218702	0.0774097	Not Significant
sll1432	SGL_RS10880	hypB	3685.84	0.251733	0.10997	2.2891	0.0220734	0.078019	Not Significant
slr7097	SGL_RS01085		2118.52	-0.307819	0.134483	-2.2889	0.0220853	0.078019	Not Significant
sll0520	SGL_RS16995	ndhI	16477.4	0.205006	0.0895984	2.28806	0.0221342	0.0780399	Not Significant
sll8019	SGL_RS01225		524.752	-0.332518	0.145325	-2.2881	0.0221315	0.0780399	Not Significant
slr1738	SGL_RS08080		2008.77	0.256958	0.112388	2.28635	0.0222335	0.0783138	Not Significant
ssl2420	SGL_RS09735		698.616	-0.299316	0.130996	-2.28493	0.0223171	0.0785318	Not Significant
slr2097	SGL_RS09185	glbN	4365.78	0.233514	0.102274	2.28323	0.022417	0.0787307	Not Significant
slr1278	SGL_RS10715	tilS	561.945	-0.29506	0.12922	-2.28339	0.0224074	0.0787307	Not Significant
SGL_RS19405			224.215	0.383011	0.167806	2.28246	0.022462	0.0788125	Not Significant
slr0417	SGL_RS14415	gyrA	8649.1	0.228708	0.100336	2.27942	0.0226423	0.0793683	Not Significant
slr0883	SGL_RS07200		2552.32	-0.27161	0.119228	-2.27807	0.0227225	0.079496	Not Significant
slr1273	SGL_RS10680		20989.5	-0.265639	0.116607	-2.27807	0.0227223	0.079496	Not Significant
slr0679	SGL_RS03855	rsmB	6122.31	-0.226857	0.0996777	-2.27591	0.0228514	0.0797931	Not Significant
SGL_RS15850			22.6972	1.11717	0.490859	2.27595	0.0228491	0.0797931	Not Significant
SGL_RS19410			259.579	0.368526	0.162663	2.26558	0.0234771	0.0818991	Not Significant
slr0977	SGL_RS03520		8684.33	0.244427	0.107931	2.26466	0.0235338	0.0820181	Not Significant
sll1735	SGL_RS06280		4994.79	0.26533	0.117187	2.26416	0.0235642	0.0820449	Not Significant
slr0827	SGL_RS15085	alr	10231.2	-0.268738	0.118786	-2.26236	0.0236751	0.0823521	Not Significant
slr1201	SGL_RS06015	urtC	6115.04	0.276794	0.122381	2.26174	0.0237137	0.0824075	Not Significant
SGL_RS19120			1211.46	-0.801126	0.354854	-2.25762	0.0239691	0.0831355	Not Significant
slr0535	SGL_RS16670		12614.8	0.250488	0.110942	2.25782	0.0239569	0.0831355	Not Significant
SGL_RS19735			243.927	-0.412766	0.18304	-2.25506	0.0241297	0.0836128	Not Significant
sll0419	SGL_RS11795		166.931	0.49278	0.218569	2.25458	0.0241597	0.0836367	Not Significant
sll0871	SGL_RS07205		2597.45	0.244868	0.10879	2.25084	0.0243958	0.0843735	Not Significant
slr0072	SGL_RS15235	rsmG	799.84	0.301979	0.134302	2.24851	0.0245438	0.0848048	Not Significant
slr1867	SGL_RS07485	trpD	2311.94	-0.236338	0.105193	-2.24671	0.0246588	0.0851208	Not Significant
slr1764	SGL_RS04380		363.37	-0.436628	0.19447	-2.24523	0.0247535	0.0852857	Not Significant
SGL_RS18805			544.095	0.333127	0.148366	2.24531	0.0247484	0.0852857	Not Significant
slr0081	SGL_RS15310		15501.7	-0.191006	0.0850889	-2.24479	0.0247818	0.085302	Not Significant
slr0864	SGL_RS08255		11854.4	-0.232691	0.103842	-2.24081	0.0250382	0.0861028	Not Significant
slr1890	SGL_RS05685	bfr	15853.8	-0.205652	0.09183	-2.23949	0.025124	0.0863161	Not Significant
SGL_RS18790			3099.03	0.235343	0.105175	2.23763	0.025245	0.0864873	Not Significant
SGL_RS15855			205.687	0.470411	0.210227	2.23763	0.0252453	0.0864873	Not Significant
sll0048	SGL_RS16445		5219.28	0.239003	0.106791	2.23804	0.0252183	0.0864873	Not Significant
ssl3692	SGL_RS08555		190.868	0.438503	0.196239	2.23454	0.0254477	0.0870982	Not Significant
SGL_RS19610			2259.51	-0.243309	0.108916	-2.23391	0.025489	0.0871574	Not Significant
slr7061	SGL_RS00915	csx2	6592.09	-0.198855	0.0890825	-2.23226	0.025598	0.0874477	Not Significant
sll1236	SGL_RS09655	patD	292.663	0.35075	0.157277	2.23015	0.0257375	0.0877591	Not Significant
slr0054	SGL_RS13875	dgkA	3707.56	0.258707	0.115995	2.23034	0.0257251	0.0877591	Not Significant
slr0164	SGL_RS12225	clpR	36177.5	0.206554	0.0927169	2.2278	0.0258939	0.0882096	Not Significant
sll1418	SGL_RS09330		3406.76	-0.226622	0.101842	-2.22523	0.0260659	0.0885719	Not Significant
SGL_RS11715			2344.76	0.340923	0.153216	2.22511	0.0260735	0.0885719	Not Significant
sll0384	SGL_RS14430	cbiQ	330.722	0.330109	0.14831	2.2258	0.0260276	0.0885719	Not Significant
slr0525	SGL_RS16610	chlM	1491.65	0.240382	0.108143	2.2228	0.026229	0.0890167	Not Significant
ssl2920	SGL_RS04140		183.81	-0.445362	0.200492	-2.22135	0.0263272	0.0892664	Not Significant
slr1127	SGL_RS02270		25180.1	0.221395	0.0998343	2.21762	0.0265806	0.0900416	Not Significant
slr1706	SGL_RS05290	dfrA	857.277	0.315209	0.142226	2.21626	0.0266739	0.0902733	Not Significant
sll1667	SGL_RS03105		2843.15	0.234401	0.105788	2.21577	0.0267071	0.0903013	Not Significant
ssl1004	SGL_RS16970		1525.71	0.245779	0.11095	2.21522	0.0267448	0.0903447	Not Significant
sll1158	SGL_RS08355		147.968	-0.463433	0.209293	-2.21427	0.0268099	0.0904802	Not Significant
sll0704	SGL_RS02380		4704.12	0.196543	0.0888767	2.21141	0.0270072	0.0908838	Not Significant
slr1796	SGL_RS03115		2621.92	-0.266552	0.120572	-2.21073	0.0270547	0.0908838	Not Significant
sll0832	SGL_RS15110		225.191	0.384857	0.174064	2.21101	0.0270355	0.0908838	Not Significant
sll0672	SGL_RS16270		3817.21	-0.274641	0.124188	-2.21149	0.0270017	0.0908838	Not Significant
slr0529	SGL_RS16640	ggtB	455.116	0.337929	0.152817	2.21134	0.0270124	0.0908838	Not Significant
slr1391	SGL_RS05115		889.103	0.287042	0.129876	2.21013	0.0270958	0.0909376	Not Significant
slr7099	SGL_RS01095		592.312	-0.309482	0.140118	-2.20873	0.0271938	0.091182	Not Significant
slr5013	SGL_RS00060		988.689	-0.313299	0.141906	-2.20779	0.0272586	0.0913151	Not Significant
ST6803t09	SGL_RS06225		6953.65	0.201895	0.0915762	2.20467	0.0274773	0.0917248	Not Significant
sll1722	SGL_RS06335		1722.59	0.817522	0.37082	2.20463	0.0274798	0.0917248	Not Significant
slr1677	SGL_RS11120		1550.58	0.310824	0.140989	2.2046	0.0274821	0.0917248	Not Significant
slr5073	SGL_RS00330		2871.77	-0.220913	0.100199	-2.20475	0.0274715	0.0917248	Not Significant
sll0983	SGL_RS04970		871.202	0.255792	0.116059	2.20397	0.0275263	0.0917881	Not Significant
sll1969	SGL_RS06125		336.344	0.335509	0.152329	2.20253	0.0276282	0.0920432	Not Significant
sll1106	SGL_RS18185		30739.3	0.267279	0.121411	2.20143	0.0277054	0.0922159	Not Significant
slr0398	SGL_RS12015		4022.2	0.233326	0.10611	2.19891	0.0278847	0.0927274	Not Significant
slr2062	SGL_RS08560		15684.5	0.205811	0.0936437	2.1978	0.0279631	0.0929031	Not Significant
sll8002	SGL_RS01135		1015.51	-0.261656	0.119109	-2.19678	0.028036	0.09306	Not Significant
slr1137	SGL_RS05545	ctaD	10823	0.268849	0.122411	2.19629	0.0280715	0.0930926	Not Significant
sll0899	SGL_RS16850	glmU	2290.58	-0.231396	0.105601	-2.19122	0.0284356	0.0941282	Not Significant
slr8029	SGL_RS01270		364.433	-0.336768	0.153682	-2.19133	0.0284278	0.0941282	Not Significant
slr1962	SGL_RS10220		2529.86	-0.262961	0.120031	-2.19078	0.028468	0.0941495	Not Significant
sll7002	SGL_RS00635		51.2559	-0.793678	0.362425	-2.18991	0.0285306	0.0942705	Not Significant
slr1790	SGL_RS03055	hemJ	7709.15	0.202196	0.0924271	2.18763	0.0286966	0.0947328	Not Significant
sll1527	SGL_RS11605		3953.65	-0.375916	0.171871	-2.1872	0.0287278	0.0947496	Not Significant
sll0145	SGL_RS12170	frr	8794.44	-0.271602	0.12429	-2.18523	0.0288718	0.095138	Not Significant
sll0595	SGL_RS15580		1474.47	0.335252	0.153465	2.18455	0.0289219	0.0952165	Not Significant
slr1400	SGL_RS03815		7419.46	0.24896	0.114046	2.18299	0.0290369	0.0955083	Not Significant
slr2075	SGL_RS06165	groES	13892.5	-0.376622	0.172838	-2.17905	0.029328	0.0962045	Not Significant
sll0572	SGL_RS18260		6321.19	0.293367	0.134596	2.17961	0.0292862	0.0962045	Not Significant
slr7008	SGL_RS00665		35.2553	-0.833292	0.382387	-2.17918	0.0293179	0.0962045	Not Significant
slr1368	SGL_RS07105	cbiT	943.275	0.249284	0.114464	2.17784	0.0294179	0.0963251	Not Significant
slr1348	SGL_RS10115	cysE	983.493	0.235898	0.108304	2.17812	0.0293972	0.0963251	Not Significant
slr0220	SGL_RS13565	glyS	5610.51	-0.232089	0.106618	-2.17684	0.0294926	0.0964826	Not Significant
slr1406	SGL_RS07355		17132.8	-0.243321	0.111817	-2.17606	0.0295504	0.0965846	Not Significant
SGL_RS20015			503.909	-0.387538	0.178123	-2.17568	0.0295793	0.0965919	Not Significant
slr1078	SGL_RS03705		2233.08	0.311919	0.143413	2.17498	0.0296318	0.0966763	Not Significant
ssr1114	SGL_RS17350		1961.98	0.222249	0.102228	2.17406	0.0297005	0.0968134	Not Significant
sll7033	SGL_RS00775		416.511	-0.319858	0.147243	-2.17232	0.0298315	0.0971531	Not Significant
sll1477	SGL_RS17565		1126.6	-0.248599	0.114476	-2.17162	0.0298843	0.0972377	Not Significant
slr1392	SGL_RS05125	feoB	1541.79	-0.296904	0.136764	-2.17092	0.029937	0.0973219	Not Significant
slr5055	SGL_RS00250		441.312	-0.288556	0.13294	-2.17057	0.0299638	0.0973219	Not Significant
sll0729	SGL_RS17695		1470.64	-0.237968	0.109693	-2.1694	0.0300526	0.0975232	Not Significant
sll1683	SGL_RS02955		999.168	0.270615	0.12486	2.16734	0.030209	0.0979429	Not Significant
slr2057	SGL_RS08525	aqpZ	75769.3	-0.267429	0.123441	-2.16646	0.0302759	0.0980724	Not Significant
sll0482	SGL_RS15445		2057.06	0.211844	0.0978307	2.16542	0.0303559	0.0982438	Not Significant
SGL_RS19380			13.4155	-1.3641	0.630094	-2.16491	0.0303945	0.0982809	Not Significant
slr1603	SGL_RS04110		5269.22	0.233382	0.107909	2.16276	0.0305593	0.0986381	Not Significant
slr7010	SGL_RS00675	cas3	835.467	-0.30104	0.139181	-2.16294	0.0305456	0.0986381	Not Significant
slr0291	SGL_RS11930		1916.94	-0.216171	0.100044	-2.16076	0.0307138	0.0990486	Not Significant
slr1452	SGL_RS17140	sbpA	463.893	0.289845	0.134228	2.15934	0.0308239	0.0993154	Not Significant
sll0286	SGL_RS15920		1285.47	0.265541	0.123039	2.15818	0.0309135	0.0995157	Not Significant
sll1678	SGL_RS03000		1300.78	-0.354104	0.164118	-2.15762	0.0309577	0.0995684	Not Significant
slr1925	SGL_RS12265	cobD	940.386	0.236894	0.109812	2.15727	0.0309848	0.0995684	Not Significant
sll1512	SGL_RS04055		1329.29	0.225117	0.104416	2.15597	0.0310859	0.0997505	Not Significant
SGL_RS19935			420.967	0.341783	0.158539	2.15584	0.0310964	0.0997505	Not Significant
slr0165	SGL_RS12230	clpP3	17245.2	0.21393	0.0993831	2.15258	0.0313517	0.100481	Not Significant
sll1182	SGL_RS10620		1982.76	0.257196	0.119514	2.15201	0.0313963	0.100535	Not Significant
sll1489	SGL_RS17470	larB	1318.09	-0.276924	0.128743	-2.15099	0.031477	0.100704	Not Significant
slr1169	SGL_RS11035		1367.17	0.262697	0.122232	2.14917	0.0316212	0.101076	Not Significant
slr0897	SGL_RS14770		1367.22	0.284302	0.132384	2.14755	0.0317496	0.101397	Not Significant
slr1218	SGL_RS06640		2727.36	-0.240996	0.112286	-2.14627	0.0318511	0.101632	Not Significant
sll1658	SGL_RS03165		484.776	0.296618	0.138265	2.14529	0.0319293	0.101792	Not Significant
sll0838	SGL_RS08270	pyrF	1478.22	0.298278	0.139339	2.14066	0.0323015	0.102888	Not Significant
sll1378	SGL_RS10565		1569.96	0.255586	0.119529	2.13828	0.0324938	0.10341	Not Significant
sll0479	SGL_RS15480		181.991	0.392052	0.183381	2.13791	0.0325239	0.103415	Not Significant
sll0921	SGL_RS11285		1937.23	0.243374	0.113892	2.13689	0.0326069	0.103588	Not Significant
slr1512	SGL_RS09335		4615.36	0.235796	0.110479	2.1343	0.032818	0.104168	Not Significant
sll1267	SGL_RS07120		24337.7	0.192309	0.0901393	2.13346	0.0328868	0.104204	Not Significant
sll0043	SGL_RS16475		3297.14	0.279086	0.130799	2.1337	0.0328675	0.104204	Not Significant
SGL_RS19455			116.909	0.470543	0.220984	2.12931	0.0332289	0.105196	Not Significant
sll0297	SGL_RS12605		8673.34	0.243584	0.114419	2.12887	0.0332651	0.105219	Not Significant
slr1424	SGL_RS17055	murB	1353.34	-0.260108	0.122365	-2.12568	0.0335299	0.105872	Not Significant
slr7013	SGL_RS00690	cas5d	590.89	-0.367367	0.172813	-2.12581	0.0335188	0.105872	Not Significant
SGL_RS19335			235.472	-0.3735	0.17583	-2.12421	0.0336526	0.106167	Not Significant
sll0662	SGL_RS16345		8821.42	-0.348211	0.164016	-2.12303	0.0337515	0.106386	Not Significant
ssl0020	SGL_RS13450	petF	231439	-0.222927	0.105106	-2.12098	0.0339235	0.106835	Not Significant
sll0245	SGL_RS08975	ychF	2546.63	-0.212102	0.100032	-2.12033	0.0339782	0.106915	Not Significant
sll0101	SGL_RS15735		676.496	-0.267886	0.126625	-2.11559	0.0343796	0.108084	Not Significant
sll1803	SGL_RS05825	rplV	2733.39	-0.277573	0.131446	-2.11169	0.0347132	0.108944	Not Significant
sll0617	SGL_RS14225		16500.1	-0.226656	0.107328	-2.11181	0.0347023	0.108944	Not Significant
sll0209	SGL_RS13550		6345.16	0.208614	0.098886	2.10964	0.0348891	0.109402	Not Significant
sll1888	SGL_RS10295		4833.1	-0.235798	0.111877	-2.10765	0.0350611	0.109846	Not Significant
slr0287	SGL_RS11920		11042.5	0.189237	0.0898139	2.107	0.035118	0.109929	Not Significant
slr0530	SGL_RS16645	ggtC	1037.37	0.291301	0.138396	2.10484	0.0353056	0.110421	Not Significant
slr0729	SGL_RS02365		5776.13	0.224214	0.106557	2.10417	0.0353632	0.110444	Not Significant
slr0901	SGL_RS14790	moaA	1040.1	0.306658	0.145746	2.10406	0.0353736	0.110444	Not Significant
ssr5011	SGL_RS00050		143.405	-0.415585	0.19756	-2.10359	0.0354145	0.110476	Not Significant
slr1900	SGL_RS05895		2278.39	0.290521	0.13816	2.10279	0.0354843	0.110599	Not Significant
slr1599	SGL_RS04080		4380.48	0.227931	0.108423	2.10224	0.0355323	0.110653	Not Significant
sll2011	SGL_RS07750	queE	847.185	0.266014	0.126579	2.10156	0.0355918	0.110744	Not Significant
slr0654	SGL_RS17270		8384.3	0.206735	0.098411	2.10073	0.0356647	0.110875	Not Significant
sll1160	SGL_RS08345		597.638	-0.263686	0.12573	-2.09724	0.0359725	0.111545	Not Significant
sll1543	SGL_RS17920		55.19	-0.713997	0.340432	-2.09732	0.0359648	0.111545	Not Significant
slr0451	SGL_RS18000		4868.39	0.20954	0.0998799	2.09792	0.0359126	0.111545	Not Significant
ST6803t13	SGL_RS08100		1277.78	0.368883	0.176091	2.09485	0.0361846	0.112107	Not Significant
slr0688	SGL_RS03940	csaB	669.28	0.259555	0.123944	2.09414	0.0362475	0.112206	Not Significant
sll0042	SGL_RS16480		725.553	0.313867	0.149904	2.09378	0.0362792	0.112209	Not Significant
slr1516	SGL_RS09370	sodB	64119.3	0.236163	0.113059	2.08885	0.0367214	0.11348	Not Significant
slr1842	SGL_RS06370	cysK	4100.74	-0.253698	0.121483	-2.08834	0.0367672	0.113525	Not Significant
slr0321	SGL_RS12545	era	746.852	0.382287	0.183252	2.08613	0.0369666	0.114043	Not Significant
slr0942	SGL_RS11340		6936.25	0.209913	0.10064	2.08578	0.0369982	0.114044	Not Significant
slr1557	SGL_RS17395		6030.73	0.184816	0.0886696	2.08432	0.037131	0.114356	Not Significant
slr0943	SGL_RS11345	fda	6525.79	0.212879	0.102157	2.08384	0.0371747	0.114394	Not Significant
sll0613	SGL_RS14255	ruvB	736.044	0.25752	0.123626	2.08306	0.0372456	0.114514	Not Significant
sll1329	SGL_RS17125		2307.14	0.240601	0.115523	2.08271	0.0372778	0.114516	Not Significant
slr1597	SGL_RS04035		1222.65	-0.272165	0.130779	-2.0811	0.0374246	0.11487	Not Significant
sll1221	SGL_RS09755	hoxF	2967.66	0.238754	0.114874	2.07841	0.037672	0.115532	Not Significant
slr0812	SGL_RS09870	coaX	782.018	0.250274	0.120471	2.07746	0.0377591	0.115701	Not Significant
ST6803t12	SGL_RS06995		1755	0.249912	0.120359	2.07639	0.0378577	0.115905	Not Significant
ST6803r03	SGL_RS13310		370.691	-0.501092	0.241571	-2.07431	0.0380509	0.116399	Not Significant
sll0350	SGL_RS12875		7239.09	-0.18163	0.0877318	-2.07028	0.0384257	0.117446	Not Significant
ST6803t23	SGL_RS11745		557.014	0.284885	0.137691	2.06902	0.0385444	0.11771	Not Significant
sll5046	SGL_RS00205		3313	-0.191083	0.0924459	-2.06697	0.0387367	0.118197	Not Significant
sll1786	SGL_RS05935	dtd3	14470.9	0.18531	0.0896775	2.0664	0.0387907	0.118263	Not Significant
slr0078	SGL_RS15290	queD	1139.27	0.245843	0.119002	2.06588	0.0388401	0.118314	Not Significant
ssl3335	SGL_RS06220	secE	27639.2	0.202453	0.0981331	2.06305	0.0391082	0.118931	Not Significant
slr5110	SGL_RS00515		12269.4	-0.199822	0.0968483	-2.06324	0.0390896	0.118931	Not Significant
slr1734	SGL_RS08030	opcA	10709.1	0.214303	0.104126	2.05811	0.03958	0.120265	Not Significant
sll1717	SGL_RS06385		2614.1	0.225559	0.10967	2.05671	0.0397142	0.120572	Not Significant
sll1395	SGL_RS02095	rfbD	1630.05	0.230057	0.1119	2.05591	0.0397911	0.120704	Not Significant
slr6074	SGL_RS01710		28.2789	-0.993873	0.483572	-2.05527	0.0398525	0.120789	Not Significant
slr1622	SGL_RS11485	ppa	9992.54	-0.246526	0.120018	-2.05407	0.0399685	0.120961	Not Significant
slr0036	SGL_RS16530		610.711	0.255672	0.124475	2.054	0.0399758	0.120961	Not Significant
sll1934	SGL_RS04670		1444.97	-0.223521	0.108889	-2.05275	0.0400969	0.121226	Not Significant
sml0003	SGL_RS18650	psbM	1203.26	-0.306257	0.149231	-2.05223	0.0401475	0.121278	Not Significant
SGL_RS19560			13467.4	0.282361	0.137846	2.04839	0.0405221	0.122105	Not Significant
slr0406	SGL_RS12080	pyrC	2533.61	-0.196422	0.0958768	-2.04869	0.0404924	0.122105	Not Significant
SGL_RS19690			28.1627	-1.0378	0.506558	-2.04874	0.0404879	0.122105	Not Significant
sll0002	SGL_RS13510		8746.26	0.218862	0.106875	2.04782	0.0405775	0.122125	Not Significant
slr0664	SGL_RS17355		1393.4	0.243227	0.118785	2.04763	0.0405962	0.122125	Not Significant
slr0604	SGL_RS18350	lepA	8523.9	0.193194	0.0945103	2.04416	0.040938	0.123052	Not Significant
sll1201	SGL_RS03220		10297.5	-0.191257	0.0936144	-2.04303	0.0410495	0.123284	Not Significant
sll1612	SGL_RS08710		1548.28	-0.215139	0.105392	-2.04132	0.0412189	0.123691	Not Significant
slr1726	SGL_RS08840		1600.73	-0.258879	0.126886	-2.04025	0.0413257	0.123806	Not Significant
SGL_RS19625			576.168	-0.298184	0.146147	-2.0403	0.0413208	0.123806	Not Significant
sll0927	SGL_RS03470	metK	11348.8	-0.269677	0.132441	-2.0362	0.0417304	0.124916	Not Significant
slr2002	SGL_RS08660	cphA	4619.23	-0.18728	0.0920079	-2.03548	0.0418025	0.125028	Not Significant
ST6803t30	SGL_RS13470		349.248	0.362669	0.178231	2.03482	0.0418688	0.125124	Not Significant
slr1993	SGL_RS08620	phaA	918.594	0.240714	0.118347	2.03397	0.0419546	0.125277	Not Significant
sll1981	SGL_RS09150		12681	0.239975	0.118045	2.0329	0.0420622	0.125392	Not Significant
sll0535	SGL_RS16905	clpX	8676.26	0.183653	0.0903277	2.03318	0.042034	0.125392	Not Significant
slr1041	SGL_RS04195		4497.33	0.212828	0.104744	2.03189	0.0421645	0.125593	Not Significant
sll1326	SGL_RS02675	atpA	62580.8	-0.224819	0.11073	-2.03033	0.0423227	0.125961	Not Significant
sll1685	SGL_RS02935		1119.56	-0.332408	0.1638	-2.02935	0.0424222	0.126007	Not Significant
sll0809	SGL_RS09905		112.968	0.495301	0.244037	2.02961	0.0423959	0.126007	Not Significant
sll1390	SGL_RS10450		15284.7	-0.176489	0.0869764	-2.02916	0.0424424	0.126007	Not Significant
sll0423	SGL_RS11765		4405.6	0.21418	0.10558	2.0286	0.0424989	0.126072	Not Significant
slr0702	SGL_RS16230		549.574	0.270986	0.133677	2.02717	0.0426447	0.126401	Not Significant
sll1876	SGL_RS10380	hemN	1591.44	-0.265263	0.131023	-2.02456	0.0429127	0.126884	Not Significant
slr0156	SGL_RS12190	clpB1	5263.36	-0.224829	0.111032	-2.02491	0.0428767	0.126884	Not Significant
slr0008	SGL_RS13410	ctpA	9052.1	-0.190306	0.0939947	-2.02464	0.0429039	0.126884	Not Significant
slr1275	SGL_RS10690		7000.34	-0.278054	0.137626	-2.02035	0.0433472	0.128065	Not Significant
slr1464	SGL_RS17205		578.805	0.276559	0.136916	2.01991	0.0433923	0.128094	Not Significant
slr0833	SGL_RS15120	dnaB	1140.38	-0.262779	0.130245	-2.01756	0.0436368	0.128711	Not Significant
sll0639	SGL_RS03955		2895.43	0.200315	0.0993735	2.01578	0.0438225	0.129154	Not Significant
sll1503	SGL_RS04155		6528.73	-0.203349	0.10092	-2.01497	0.0439083	0.129301	Not Significant
sll0060	SGL_RS13935		844.104	0.241758	0.12012	2.01263	0.0441532	0.129917	Not Significant
slr1176	SGL_RS18090	glgC	36008.1	-0.21655	0.107682	-2.01102	0.0443236	0.130313	Not Significant
slr1974	SGL_RS10320	der	4406.04	0.240789	0.119962	2.00721	0.0447269	0.131387	Not Significant
sll0741	SGL_RS16420	nifJ	4031.4	-0.233152	0.116176	-2.00689	0.0447614	0.131387	Not Significant
slr1861	SGL_RS07450		1952.98	-0.205405	0.102373	-2.00644	0.0448095	0.131422	Not Significant
slr0980	SGL_RS03530		9137.33	0.217073	0.108299	2.00439	0.0450288	0.131958	Not Significant
sll1530	SGL_RS11595		11961.5	-0.207936	0.10376	-2.004	0.0450699	0.131972	Not Significant
sll1371	SGL_RS10605		1950.48	0.219566	0.109634	2.00271	0.0452085	0.132271	Not Significant
slr0434	SGL_RS13730	efp	6515.05	-0.200358	0.100061	-2.00236	0.0452455	0.132273	Not Significant
slr1530	SGL_RS10835		857.717	-0.25386	0.127006	-1.9988	0.0456297	0.133181	Not Significant
sll0727	SGL_RS17735		2223.02	-0.260072	0.130103	-1.99897	0.0456113	0.133181	Not Significant
sll0385	SGL_RS14425		746.36	0.238746	0.11951	1.9977	0.0457488	0.133422	Not Significant
slr0975	SGL_RS03490		9787.26	0.270774	0.135673	1.99578	0.0459578	0.133828	Not Significant
ssr3465	SGL_RS04605		3842.51	-0.217979	0.109222	-1.99574	0.045962	0.133828	Not Significant
slr0315	SGL_RS15980		1091.62	0.284969	0.142882	1.99443	0.0461051	0.134137	Not Significant
sll0873	SGL_RS07180	nspC	1723.4	-0.21064	0.105662	-1.99352	0.0462042	0.134318	Not Significant
slr1484	SGL_RS02005		207.751	-0.353869	0.177559	-1.99296	0.0462655	0.134388	Not Significant
slr1149	SGL_RS05640		2788.89	0.219538	0.110187	1.9924	0.0463268	0.134449	Not Significant
slr1230	SGL_RS06710		489.151	-0.263299	0.132173	-1.99208	0.0463625	0.134449	Not Significant
slr0881	SGL_RS07185		1319.23	0.257492	0.129287	1.99163	0.0464121	0.134449	Not Significant
slr0393	SGL_RS11970		303.549	-0.372768	0.187187	-1.99142	0.0464345	0.134449	Not Significant
sll1504	SGL_RS04150		393.277	-0.302743	0.152123	-1.99012	0.0465781	0.13475	Not Significant
slr0599	SGL_RS18320	spkC	2987.65	0.217966	0.109542	1.9898	0.0466129	0.13475	Not Significant
slr1020	SGL_RS04850		36857.4	-0.171533	0.0862675	-1.98838	0.0467696	0.134809	Not Significant
slr2024	SGL_RS05445		5161.33	-0.210108	0.105676	-1.98822	0.0467873	0.134809	Not Significant
sll1228	SGL_RS09700		4103.55	0.207135	0.104165	1.98853	0.0467529	0.134809	Not Significant
sll0775	SGL_RS16195		321.331	-0.333839	0.167888	-1.98847	0.0467599	0.134809	Not Significant
ssl5096	SGL_RS00450		159.454	-0.420959	0.211757	-1.98793	0.046819	0.134809	Not Significant
sll0998	SGL_RS04820	rbcR	16422.1	-0.20057	0.100933	-1.98716	0.0469045	0.134948	Not Significant
slr1784	SGL_RS02995		1047.22	0.238698	0.12016	1.9865	0.0469779	0.134987	Not Significant
slr0362	SGL_RS12870		946.722	0.219181	0.110343	1.98637	0.0469923	0.134987	Not Significant
slr1546	SGL_RS06485		14653.3	0.288317	0.145324	1.98396	0.04726	0.135648	Not Significant
sll1060	SGL_RS02175		5698.3	0.206025	0.103977	1.98145	0.047541	0.135917	Not Significant
sll1797	SGL_RS05860		261.762	0.382182	0.19281	1.98217	0.0474597	0.135917	Not Significant
sll1362	SGL_RS06865	ileS	13713.4	-0.204137	0.103013	-1.98167	0.0475161	0.135917	Not Significant
sll1373	SGL_RS10595		1044.27	-0.228648	0.115322	-1.98269	0.0474022	0.135917	Not Significant
sll0068	SGL_RS13845		13597.9	0.202889	0.102392	1.98148	0.0475372	0.135917	Not Significant
slr1135	SGL_RS05530		1803.58	-0.250419	0.12649	-1.97975	0.0477314	0.136144	Not Significant
sll0244	SGL_RS08980	galE	2904.78	-0.198256	0.100132	-1.97995	0.0477094	0.136144	Not Significant
sll1334	SGL_RS17095		7528.72	0.26956	0.136159	1.97974	0.0477329	0.136144	Not Significant
slr1256	SGL_RS08455	ureA	1669.34	0.220616	0.111503	1.97857	0.047864	0.136411	Not Significant
slr1859	SGL_RS07440		6498.55	-0.217356	0.109998	-1.976	0.0481552	0.137133	Not Significant
SGL_RS19355			113.871	-0.464408	0.235082	-1.97551	0.04821	0.137161	Not Significant
ssl5091	SGL_RS00425		65.5206	-0.551739	0.279327	-1.97524	0.0482406	0.137161	Not Significant
slr1164	SGL_RS10995	nrdA	15836.5	-0.187369	0.0949044	-1.97429	0.0483488	0.137361	Not Significant
slr1384	SGL_RS05050		1595.64	0.236565	0.1199	1.97303	0.0484924	0.137553	Not Significant
sll1104	SGL_RS10905		1131.22	-0.208609	0.105728	-1.97307	0.0484881	0.137553	Not Significant
slr1302	SGL_RS03305		11945.8	-0.181548	0.0920476	-1.97233	0.0485723	0.137569	Not Significant
slr0591	SGL_RS18250		22599.7	0.187387	0.0950087	1.97231	0.0485737	0.137569	Not Significant
SGL_RS19400			59.2325	-0.655139	0.332502	-1.97033	0.0488004	0.138103	Not Significant
sll1297	SGL_RS05065		583.902	0.269506	0.136883	1.96888	0.0489665	0.138465	Not Significant
slr0565	SGL_RS14950		7999.34	0.176004	0.0894162	1.96836	0.0490261	0.138525	Not Significant
sll1677	SGL_RS03005		3253.47	-0.243426	0.123698	-1.96791	0.0490789	0.138567	Not Significant
sll1713	SGL_RS06405	cobD	5449.21	-0.209148	0.106319	-1.96717	0.0491631	0.138697	Not Significant
sll1001	SGL_RS04315		723.424	0.303656	0.154662	1.96335	0.0496053	0.139727	Not Significant
slr1843	SGL_RS06375	zwf	17325.3	0.172958	0.0880789	1.96368	0.0495678	0.139727	Not Significant
sll0177	SGL_RS12705		496.581	0.264309	0.135064	1.95692	0.0503564	0.141732	Not Significant
slr0325	SGL_RS12565		243.66	0.365252	0.186815	1.95515	0.050565	0.142209	Not Significant
slr0328	SGL_RS12590		485.915	0.288375	0.147609	1.95364	0.0507433	0.1426	Not Significant
slr1737	SGL_RS08070		1820.74	0.232665	0.119157	1.9526	0.0508672	0.142838	Not Significant
slr1678	SGL_RS11125	rplU	27601.5	0.213594	0.109413	1.95218	0.0509166	0.142866	Not Significant
slr0342	SGL_RS13200	petB	161253	-0.185285	0.0949461	-1.95147	0.0510006	0.142991	Not Significant
slr0813	SGL_RS09875		609.483	0.318599	0.163469	1.94898	0.0512973	0.143712	Not Significant
sll0876	SGL_RS07140	ruvA	585.991	0.257019	0.131966	1.94761	0.0514611	0.144059	Not Significant
slr0666	SGL_RS17365		3608.16	-0.204779	0.105181	-1.94692	0.0515448	0.144182	Not Significant
slr0795	SGL_RS16070		1131.49	-0.277923	0.142784	-1.94645	0.0516005	0.144227	Not Significant
slr1409	SGL_RS07365		5805.09	-0.207847	0.106846	-1.9453	0.0517389	0.144502	Not Significant
slr1919	SGL_RS04810		4945.36	-0.305741	0.157588	-1.94013	0.0523643	0.146137	Not Significant
slr0944	SGL_RS11355	acr3	928.299	0.270973	0.13974	1.93911	0.0524875	0.146368	Not Significant
slr0637	SGL_RS14285		6767.15	0.174781	0.0902478	1.93668	0.0527841	0.147082	Not Significant
SGL_RS19000			183.444	-0.431283	0.222834	-1.93544	0.0529359	0.147392	Not Significant
sll1299	SGL_RS05025	ackA	1546.6	0.228586	0.118239	1.93326	0.0532047	0.147913	Not Significant
slr1838	SGL_RS06350	ccmK3	2999.98	-0.215286	0.11134	-1.93358	0.0531642	0.147913	Not Significant
slr2110	SGL_RS09485		337.961	-0.400976	0.207552	-1.93193	0.0533679	0.148253	Not Significant
ssl3291	SGL_RS07845		4374.21	0.188705	0.0977027	1.93142	0.0534306	0.148314	Not Significant
SGL_RS06990			14935.4	-0.193384	0.100198	-1.93002	0.0536045	0.148621	Not Significant
sll0055	SGL_RS13970		1902.46	0.246894	0.127933	1.92987	0.0536231	0.148621	Not Significant
slr0348	SGL_RS13250	ispH	3961.92	-0.229268	0.118994	-1.92672	0.0540149	0.149592	Not Significant
sll1572	SGL_RS05305	dnaE-C	6249.23	0.238823	0.124033	1.92547	0.0541701	0.149908	Not Significant
sll0867	SGL_RS07240		1645.18	0.194246	0.100936	1.92445	0.0542985	0.150149	Not Significant
sll1832	SGL_RS04795		13115.1	0.193925	0.100852	1.92287	0.0544962	0.150466	Not Significant
slr2015	SGL_RS05405		4516.51	0.247935	0.128924	1.92311	0.0544664	0.150466	Not Significant
slr0239	SGL_RS02505	cobM	976.461	0.241253	0.125639	1.9202	0.0548321	0.151278	Not Significant
slr0613	SGL_RS01885		1034.11	0.221336	0.115355	1.91873	0.055018	0.151676	Not Significant
slr1050	SGL_RS04245		6697.45	0.191651	0.099918	1.91808	0.0551007	0.151788	Not Significant
slr1686	SGL_RS11205		3812.46	0.201416	0.105049	1.91736	0.0551924	0.151926	Not Significant
ssl3383	SGL_RS07565		2052.12	0.236231	0.123278	1.91625	0.0553328	0.152197	Not Significant
ssl6082	SGL_RS01745		26.6771	-0.826904	0.431605	-1.91588	0.0553801	0.152211	Not Significant
sll1247	SGL_RS10135		16925.7	0.224369	0.117234	1.91386	0.0556386	0.152806	Not Significant
slr0569	SGL_RS14965		4131.19	0.177818	0.0930689	1.91061	0.056055	0.153717	Not Significant
SGL_RS01120			13.0626	1.26936	0.664295	1.91084	0.0560246	0.153717	Not Significant
slr1150	SGL_RS05645		3330.88	0.216656	0.113433	1.90998	0.0561354	0.153803	Not Significant
sll1365	SGL_RS17190		2405.44	0.183764	0.0962264	1.90971	0.056171	0.153803	Not Significant
slr2030	SGL_RS05505		3710.74	0.193317	0.101296	1.90843	0.056336	0.154138	Not Significant
slr1882	SGL_RS07670	ribF	302.265	-0.317775	0.166884	-1.90417	0.0568879	0.155531	Not Significant
slr7037	SGL_RS00795		927.458	-0.226682	0.119219	-1.90139	0.0572508	0.156405	Not Significant
slr1220	SGL_RS06650		12064.6	0.189995	0.100062	1.89876	0.0575955	0.157228	Not Significant
sll1874	SGL_RS10390	acsF2	497.958	-0.28023	0.147637	-1.8981	0.0576827	0.15723	Not Significant
ssl2148	SGL_RS10990		2646.37	0.212377	0.111887	1.89814	0.0576779	0.15723	Not Significant
slr0119	SGL_RS15830	trmJ	2408.35	-0.209288	0.110306	-1.89734	0.0577835	0.157386	Not Significant
slr0592	SGL_RS18270		4428.6	0.242577	0.127906	1.89652	0.0578909	0.15756	Not Significant
slr1519	SGL_RS09390		1906.07	0.224143	0.118246	1.89557	0.0580169	0.157785	Not Significant
sll1072	SGL_RS05650		1926.11	-0.230132	0.12149	-1.89424	0.058193	0.158146	Not Significant
slr1839	SGL_RS06355	ccmK4	9857.81	-0.189232	0.0999601	-1.89308	0.0583477	0.158447	Not Significant
slr1946	SGL_RS12460		2728.76	0.181436	0.0958956	1.89202	0.0584884	0.15871	Not Significant
sll0909	SGL_RS11410		427.484	0.31476	0.166427	1.89128	0.0585872	0.15886	Not Significant
sll0813	SGL_RS09865		9119.89	0.189063	0.100026	1.89015	0.058738	0.159145	Not Significant
slr0527	SGL_RS16620	queC	792.946	0.255742	0.135325	1.88983	0.0587801	0.159145	Not Significant
slr0304	SGL_RS15905	arsS	3806.37	-0.216187	0.114628	-1.88599	0.0592959	0.160422	Not Significant
slr1538	SGL_RS06435	cbiD	738.05	0.227963	0.121163	1.88147	0.0599086	0.161959	Not Significant
sll0058	SGL_RS13940	dnaK1	5476.84	0.202055	0.107518	1.87927	0.0602073	0.162645	Not Significant
sll0071	SGL_RS13825		834.095	-0.265324	0.141291	-1.87785	0.0604012	0.163047	Not Significant
slr7101	SGL_RS01105		813.721	0.223708	0.119155	1.87745	0.0604558	0.163073	Not Significant
sll1463	SGL_RS06515	ftsH4	5042.76	0.192672	0.102755	1.87506	0.0607841	0.163837	Not Significant
slr1660	SGL_RS17850		1807.97	0.22367	0.119389	1.87346	0.0610047	0.16431	Not Significant
slr0251	SGL_RS02590	lptB	1690.6	0.214549	0.114573	1.87259	0.0611251	0.164512	Not Significant
sll1555	SGL_RS11235		5854.69	-0.16986	0.0907523	-1.87169	0.06125	0.164604	Not Significant
smr0001	SGL_RS13125	psbT	8001.59	-0.247879	0.132436	-1.87168	0.0612503	0.164604	Not Significant
slr1330	SGL_RS09710	atpC	10961.4	-0.187645	0.100297	-1.87088	0.0613614	0.164708	Not Significant
slr0572	SGL_RS14995		333.82	-0.310678	0.166071	-1.87075	0.0613798	0.164708	Not Significant
slr1083	SGL_RS03735		5666.72	0.179888	0.0962632	1.86871	0.0616636	0.165348	Not Significant
slr1611	SGL_RS03565		4062.79	0.179714	0.0962361	1.86743	0.061842	0.165704	Not Significant
slr2089	SGL_RS09110	shc	4457.94	0.205408	0.110233	1.8634	0.0624054	0.166972	Not Significant
SGL_RS12185			202.216	-0.456062	0.244815	-1.86289	0.0624781	0.166972	Not Significant
sll0736	SGL_RS17640		3210.31	-0.297291	0.15956	-1.86319	0.0624351	0.166972	Not Significant
ssr5074	SGL_RS00335		812.74	-0.227382	0.122069	-1.86273	0.0624996	0.166972	Not Significant
slr1072	SGL_RS03665		22371.3	0.173477	0.0933302	1.85874	0.0630634	0.168355	Not Significant
slr1901	SGL_RS05900		805.088	0.266925	0.143814	1.85604	0.0634476	0.169256	Not Significant
sll1570	SGL_RS05315		1788.44	0.212979	0.114862	1.85422	0.0637081	0.169826	Not Significant
sll1191	SGL_RS03290		206.002	0.411962	0.222593	1.85074	0.0642066	0.171029	Not Significant
sll0356	SGL_RS12060	trpF	428.102	-0.261431	0.141379	-1.84915	0.0644361	0.171514	Not Significant
slr1394	SGL_RS05140		4146.53	-0.171436	0.0927286	-1.84879	0.0644877	0.171526	Not Significant
slr0649	SGL_RS14365	metG	9565.93	-0.178865	0.0967888	-1.848	0.0646029	0.171706	Not Significant
slr0969	SGL_RS03425	cobJ	2508.13	0.223246	0.120906	1.84643	0.0648291	0.172182	Not Significant
sll0314	SGL_RS13285		5645.15	0.168642	0.0913666	1.84577	0.064926	0.172313	Not Significant
ssl0410	SGL_RS02605		4978.01	0.202618	0.109905	1.84357	0.0652461	0.172783	Not Significant
sll0933	SGL_RS03440		5315.16	0.17515	0.0949878	1.84392	0.0651947	0.172783	Not Significant
slr2101	SGL_RS09205		3319.04	0.218053	0.118258	1.84388	0.0652007	0.172783	Not Significant
slr0872	SGL_RS08310	lptC	1479.3	0.247814	0.134573	1.84149	0.0655503	0.173462	Not Significant
sll0295	SGL_RS12645		1177.07	-0.202898	0.11024	-1.84051	0.0656932	0.173714	Not Significant
sll0179	SGL_RS14665	gltX	2859.1	0.174358	0.0949171	1.83695	0.0662178	0.174973	Not Significant
sll1452	SGL_RS06585	nrtC	29832.9	0.252155	0.137468	1.83428	0.066613	0.175889	Not Significant
slr0303	SGL_RS15900	arsM	3181.54	-0.207737	0.113291	-1.83366	0.0667046	0.176003	Not Significant
slr2037	SGL_RS04565		242.286	-0.309096	0.168691	-1.83232	0.0669034	0.176399	Not Significant
sll0166	SGL_RS12770	cobA	2601.21	0.18122	0.0989434	1.83156	0.0670176	0.176572	Not Significant
sll0916	SGL_RS11320	cbiC	317.455	0.274533	0.150051	1.82959	0.0673107	0.177087	Not Significant
slr1950	SGL_RS12475		2044.89	0.189175	0.103391	1.8297	0.0672942	0.177087	Not Significant
slr0343	SGL_RS13205	petD	201783	-0.164884	0.0901592	-1.82881	0.067428	0.177267	Not Significant
sll1641	SGL_RS04385		8836.32	0.190508	0.104472	1.82354	0.0682221	0.178707	Not Significant
ST6803t07	SGL_RS04835		963.444	0.255095	0.139821	1.82444	0.0680861	0.178707	Not Significant
slr1366	SGL_RS07065	lspA	633.397	0.3264	0.178947	1.82401	0.0681513	0.178707	Not Significant
slr0854	SGL_RS08150	phrA	2486.87	0.230188	0.12623	1.82356	0.068219	0.178707	Not Significant
slr0513	SGL_RS15495	futA2	2825.78	-0.23424	0.12844	-1.82373	0.0681922	0.178707	Not Significant
slr1679	SGL_RS11135	ddpX	1090.21	-0.287592	0.157826	-1.82221	0.0684226	0.179103	Not Significant
sll0794	SGL_RS16080		1920.06	0.20355	0.111725	1.82188	0.0684727	0.179105	Not Significant
sll1608	SGL_RS08735		9998.56	-0.171162	0.0940303	-1.82028	0.0687158	0.179612	Not Significant
slr1600	SGL_RS04085		9429.21	-0.204142	0.1123	-1.81783	0.0690898	0.180329	Not Significant
sll5059	SGL_RS00270		3401.02	-0.217749	0.119772	-1.81803	0.0690599	0.180329	Not Significant
sll1864	SGL_RS12280		1290.59	0.233142	0.128295	1.81723	0.0691812	0.180438	Not Significant
sll1537	SGL_RS11505		649.676	-0.276568	0.152355	-1.81529	0.0694793	0.180955	Not Significant
SGL_RS11570			883.483	0.282821	0.155786	1.81545	0.0694552	0.180955	Not Significant
ST6803t03	SGL_RS03140		181.081	0.339655	0.187525	1.81125	0.0701021	0.182065	Not Significant
slr2059	SGL_RS08535		678.007	0.222519	0.122856	1.81123	0.0701059	0.182065	Not Significant
sll1909	SGL_RS08595	prmA	4432.01	0.180442	0.0995958	1.81174	0.0700257	0.182065	Not Significant
sll0757	SGL_RS13120	purF	15465.7	-0.221196	0.122068	-1.81208	0.0699743	0.182065	Not Significant
sll1161	SGL_RS08340		893.087	-0.242584	0.134006	-1.81024	0.0702581	0.182329	Not Significant
slr0817	SGL_RS09915		2341.99	0.180745	0.0999182	1.80893	0.0704612	0.182726	Not Significant
SGL_RS19320			448.434	-0.259356	0.143409	-1.8085	0.0705285	0.18277	Not Significant
slr0381	SGL_RS12955	gloA	1381.42	0.193462	0.107006	1.80795	0.0706141	0.182861	Not Significant
ssr1604	SGL_RS03360	rpmB	28941.4	-0.180907	0.100121	-1.80688	0.0707816	0.182929	Not Significant
ssr2422	SGL_RS06930		1895.06	0.181764	0.100654	1.80582	0.0709459	0.182929	Not Significant
sll0848	SGL_RS08210	dnaA	1030.65	0.210238	0.116423	1.80581	0.0709484	0.182929	Not Significant
sll1242	SGL_RS10160		29237.7	0.155321	0.0859475	1.80716	0.0707379	0.182929	Not Significant
sll1865	SGL_RS12270	prfB	2868.52	0.211233	0.116992	1.80553	0.070992	0.182929	Not Significant
sll0565	SGL_RS18305		505.715	0.254499	0.140881	1.80649	0.0708424	0.182929	Not Significant
slr6001	SGL_RS01370		23283.8	-0.256817	0.14224	-1.80552	0.0709935	0.182929	Not Significant
slr1742	SGL_RS08110	gatD	741.626	-0.226734	0.125737	-1.80325	0.0713496	0.183716	Not Significant
slr1420	SGL_RS17015		518.566	0.235421	0.130659	1.8018	0.0715774	0.184172	Not Significant
slr2125	SGL_RS09565		4796.26	-0.181515	0.100823	-1.80033	0.071808	0.184373	Not Significant
slr0952	SGL_RS11420	fbp	5417.64	0.208046	0.11552	1.80096	0.0717088	0.184373	Not Significant
sll0069	SGL_RS13840		2114.73	0.270022	0.149962	1.8006	0.0717662	0.184373	Not Significant
slr0853	SGL_RS08145	rimI	406.078	0.266817	0.148286	1.79935	0.071964	0.184643	Not Significant
sll0195	SGL_RS13630		1140.94	0.225149	0.125292	1.79699	0.0723364	0.185468	Not Significant
slr1593	SGL_RS04005		7216.03	0.300824	0.167576	1.79515	0.0726303	0.186089	Not Significant
slr2102	SGL_RS09210	ftsY	5548.79	0.198355	0.110591	1.7936	0.0728771	0.18659	Not Significant
ssr3300	SGL_RS12420		308.421	0.413088	0.230396	1.79294	0.0729817	0.186726	Not Significant
slr0846	SGL_RS15215		179.605	0.400729	0.224011	1.78888	0.0736341	0.188263	Not Significant
sll0266	SGL_RS11865		3051.53	-0.17286	0.0966822	-1.78792	0.0737882	0.188524	Not Significant
slr2007	SGL_RS05355		3519.12	0.200606	0.112242	1.78727	0.0738946	0.188582	Not Significant
slr1448	SGL_RS06955		992.956	0.265672	0.148658	1.78714	0.073915	0.188582	Not Significant
slr0191	SGL_RS14565		1867.02	0.225889	0.126475	1.78603	0.0740939	0.18886	Not Significant
slr0545	SGL_RS16765		1641.66	0.204666	0.114606	1.78582	0.0741282	0.18886	Not Significant
sll1697	SGL_RS07900		3695.95	0.206858	0.115875	1.78518	0.0742322	0.188993	Not Significant
sll1496	SGL_RS17400		7286.31	0.217034	0.121616	1.78459	0.0743281	0.189104	Not Significant
slr0261	SGL_RS08920	ndhH	8368.65	0.155617	0.0872959	1.78264	0.0746457	0.189779	Not Significant
slr1351	SGL_RS10140	murF	2437.54	-0.196429	0.110279	-1.7812	0.0748798	0.190241	Not Significant
sll0421	SGL_RS11780	purB	5988.88	-0.183282	0.103025	-1.77901	0.0752384	0.191018	Not Significant
slr1829	SGL_RS06265	phaE	16903.2	0.170852	0.096068	1.77845	0.0753302	0.191118	Not Significant
slr1665	SGL_RS17890	dapF	1598.6	-0.204354	0.115056	-1.77612	0.0757132	0.191955	Not Significant
slr1972	SGL_RS10305		10950.8	0.192234	0.108407	1.77327	0.0761842	0.192879	Not Significant
slr0435	SGL_RS13735	accB	2710.51	-0.204813	0.115485	-1.7735	0.0761452	0.192879	Not Significant
sll1454	SGL_RS06575	narB	6088.59	0.266712	0.15047	1.77252	0.0763075	0.192922	Not Significant
SGL_RS19620			3582.55	0.173457	0.0978583	1.77253	0.0763068	0.192922	Not Significant
sll0160	SGL_RS12815		2793.57	-0.200446	0.11324	-1.7701	0.0767109	0.193807	Not Significant
sll0280	SGL_RS15955		284.274	-0.300793	0.170055	-1.7688	0.0769278	0.19422	Not Significant
slr2008	SGL_RS05360		3330.06	0.174809	0.0989007	1.76752	0.0771409	0.194622	Not Significant
slr1692	SGL_RS11260		6141.21	0.200779	0.113662	1.76646	0.0773185	0.194935	Not Significant
slr2141	SGL_RS07805		1948.98	0.188907	0.10702	1.76516	0.0775372	0.195351	Not Significant
ssl2009	SGL_RS02845		1686.38	0.214776	0.121754	1.76401	0.0777301	0.195701	Not Significant
sll1666	SGL_RS03110		1420.38	0.209971	0.119067	1.76348	0.0778197	0.195791	Not Significant
slr1138	SGL_RS05550	ctaE	3963.32	0.219797	0.12486	1.76035	0.0783491	0.196577	Not Significant
slr1818	SGL_RS07955		2734.86	0.185249	0.105197	1.76097	0.078244	0.196577	Not Significant
sll0778	SGL_RS16180		1321.25	-0.202339	0.114904	-1.76094	0.078248	0.196577	Not Significant
slr0747	SGL_RS17635	ggtA	874.531	0.22361	0.127014	1.76052	0.07832	0.196577	Not Significant
sll1673	SGL_RS03035		6088.23	0.170226	0.0967631	1.7592	0.0785428	0.196927	Not Significant
ssl0294	SGL_RS12810		2330.97	0.207318	0.117976	1.75729	0.0788681	0.197336	Not Significant
SGL_RS19970			1939.43	-0.185991	0.105809	-1.7578	0.0787818	0.197336	Not Significant
ssr5019	SGL_RS00090		290.439	-0.311298	0.177147	-1.75729	0.0788692	0.197336	Not Significant
slr1125	SGL_RS02250		1225.06	-0.246441	0.140368	-1.75568	0.0791425	0.197883	Not Significant
SGL_RS18780			242.104	-0.380517	0.216835	-1.75487	0.0792815	0.198094	Not Significant
slr0655	SGL_RS17275		1700.94	0.190644	0.108672	1.75431	0.0793782	0.1982	Not Significant
ssr2142	SGL_RS03240		23369.9	-0.177331	0.10115	-1.75315	0.0795755	0.198522	Not Significant
slr0953	SGL_RS11425		833.984	0.224419	0.128026	1.75291	0.0796169	0.198522	Not Significant
slr0252	SGL_RS02595	cobK	226.967	0.302364	0.17256	1.75223	0.0797349	0.198594	Not Significant
sll8025	SGL_RS01250		50.3359	-0.562555	0.321073	-1.75211	0.0797552	0.198594	Not Significant
sll6017	SGL_RS01450		25.3096	-0.887462	0.506611	-1.75176	0.0798148	0.198606	Not Significant
slr0974	SGL_RS03485	infC	6619.55	-0.161777	0.0923948	-1.75093	0.0799575	0.198689	Not Significant
sll1239	SGL_RS09630		4694.67	-0.21154	0.120797	-1.75121	0.0799099	0.198689	Not Significant
sll0574	SGL_RS18245		2489.54	-0.173367	0.0990776	-1.74981	0.0801508	0.199033	Not Significant
slr1682	SGL_RS11180		270.367	-0.333587	0.190681	-1.74945	0.0802135	0.199052	Not Significant
slr1139	SGL_RS05555		5354.17	0.161695	0.0925756	1.74662	0.080703	0.20013	Not Significant
slr0447	SGL_RS11810	urtA	65795.8	-0.63458	0.363448	-1.746	0.0808111	0.200261	Not Significant
slr0055	SGL_RS13880		1114.37	0.220131	0.126197	1.74435	0.0810976	0.200834	Not Significant
slr1114	SGL_RS02125		10192.9	0.241058	0.138353	1.74234	0.0814484	0.201565	Not Significant
slr1542	SGL_RS06450	ispF	822.092	0.214095	0.122903	1.74199	0.0815104	0.201581	Not Significant
slr1645	SGL_RS11645	psb27	12120.9	-0.153602	0.088197	-1.74158	0.0815816	0.20162	Not Significant
sll1035	SGL_RS02850	upp	3582.64	0.195762	0.112569	1.73903	0.082029	0.20245	Not Significant
sll0601	SGL_RS14360		1050.99	-0.193166	0.111075	-1.73906	0.082025	0.20245	Not Significant
SGL_RS19060			4179.05	-0.326008	0.187634	-1.73746	0.0823057	0.202995	Not Significant
sll1693	SGL_RS07950		7941.2	-0.188418	0.108499	-1.73659	0.0824603	0.203238	Not Significant
sll0182	SGL_RS14635		8073.09	-0.176506	0.101677	-1.73594	0.0825737	0.203379	Not Significant
slr0487	SGL_RS14085		195.051	0.335939	0.193678	1.73453	0.0828249	0.203859	Not Significant
slr0678	SGL_RS03850		4048.65	0.199665	0.115279	1.73201	0.0832714	0.204767	Not Significant
sll0202	SGL_RS13590	mnmG	4747.26	0.157985	0.0912252	1.73181	0.0833067	0.204767	Not Significant
sll0911	SGL_RS11400		685.267	-0.234228	0.135553	-1.72794	0.0839987	0.206328	Not Significant
slr0415	SGL_RS14400	nhaS5	5161.99	0.224048	0.129738	1.72693	0.0841809	0.206636	Not Significant
sll0405	SGL_RS13750		9432.5	-0.169788	0.0984402	-1.72478	0.0845674	0.207444	Not Significant
slr0891	SGL_RS07285		2415.47	-0.20277	0.117639	-1.72366	0.0847686	0.207629	Not Significant
smr0010	SGL_RS10475	petG	6070.22	-0.235008	0.13636	-1.72343	0.0848107	0.207629	Not Significant
SGL_RS14230			1352.71	0.202948	0.117759	1.72341	0.0848143	0.207629	Not Significant
slr1087	SGL_RS03750		2786.33	0.246274	0.143031	1.72183	0.085101	0.20805	Not Significant
slr0105	SGL_RS15725		2461.99	0.200523	0.116445	1.72204	0.0850626	0.20805	Not Significant
ssr1528	SGL_RS14810		2959.07	-0.160032	0.0930494	-1.71986	0.0854583	0.208783	Not Significant
slr1288	SGL_RS10780		1952.63	0.258258	0.150232	1.71906	0.0856036	0.208997	Not Significant
sll1398	SGL_RS02070	psb28	5359.49	-0.170794	0.099574	-1.71525	0.0862991	0.210554	Not Significant
sll0218	SGL_RS02640		314.621	0.266944	0.155712	1.71434	0.0864654	0.210676	Not Significant
ssl5007	SGL_RS00035		17.1232	-1.03095	0.601357	-1.71437	0.0864602	0.210676	Not Significant
slr1469	SGL_RS10500	rnpA	6440.03	0.152647	0.089093	1.71335	0.0866489	0.210699	Not Significant
ST6803t22	SGL_RS11575		2485.13	0.174228	0.101656	1.7139	0.0865469	0.210699	Not Significant
sll0689	SGL_RS14155	nhaS3	2850.51	-0.207799	0.121272	-1.71349	0.0866224	0.210699	Not Significant
slr0386	SGL_RS13000		1988.23	0.190279	0.111095	1.71276	0.0867566	0.210819	Not Significant
ssr3129	SGL_RS04500		2245.96	0.227476	0.132944	1.71107	0.0870684	0.211332	Not Significant
slr1210	SGL_RS06065		622.211	-0.300509	0.175635	-1.71098	0.0870843	0.211332	Not Significant
slr1594	SGL_RS04010		8583.88	0.195522	0.114323	1.71026	0.087218	0.211515	Not Significant
sll1921	SGL_RS05430		11237.9	0.254452	0.148873	1.70919	0.087416	0.211854	Not Significant
slr0031	SGL_RS16505		7205.97	0.152132	0.0890731	1.70794	0.0876467	0.212271	Not Significant
ssr5092	SGL_RS00430		312.999	-0.274054	0.160578	-1.70667	0.0878831	0.212702	Not Significant
sll1056	SGL_RS02220	purL	2915.09	-0.157045	0.0921271	-1.70466	0.0882582	0.213467	Not Significant
slr1260	SGL_RS08480		1484.39	0.313402	0.184202	1.7014	0.088867	0.214797	Not Significant
sll1274	SGL_RS07045		3420.68	0.157257	0.0926695	1.69696	0.0897035	0.216619	Not Significant
SGL_RS18950			930.885	0.222269	0.130995	1.69677	0.0897406	0.216619	Not Significant
slr0963	SGL_RS03380	sir	7793.07	0.149036	0.0879897	1.69379	0.0903043	0.217835	Not Significant
slr0262	SGL_RS08925		1056.25	0.185616	0.10965	1.69281	0.0904923	0.218144	Not Significant
sll0220	SGL_RS02630	glmS	9173.28	0.148557	0.0878007	1.69198	0.0906497	0.218378	Not Significant
sll1189	SGL_RS03315		3006.86	0.161735	0.0956657	1.69063	0.0909074	0.218686	Not Significant
slr0957	SGL_RS11445		3768.88	0.177544	0.105033	1.69036	0.0909585	0.218686	Not Significant
slr0456	SGL_RS18045		1804.77	0.248299	0.146868	1.69062	0.0909096	0.218686	Not Significant
slr1774	SGL_RS02925		445.898	0.271034	0.160379	1.68995	0.0910369	0.21873	Not Significant
sll1040	SGL_RS02750		2297.43	0.189959	0.112483	1.68878	0.0912619	0.218864	Not Significant
slr1033	SGL_RS04930		3574.01	-0.243372	0.144077	-1.68918	0.0911841	0.218864	Not Significant
slr6072	SGL_RS01700		9.98189	-1.26215	0.747402	-1.68872	0.0912738	0.218864	Not Significant
SGL_RS18545			987.434	-0.21006	0.124437	-1.68808	0.0913951	0.21901	Not Significant
slr1397	SGL_RS05165		12670.1	0.150375	0.0891024	1.68767	0.0914753	0.219058	Not Significant
SGL_RS18755			2091.14	0.188625	0.111793	1.68727	0.0915521	0.219097	Not Significant
sll1399	SGL_RS02065		4347.98	-0.156939	0.0930378	-1.68683	0.0916359	0.219153	Not Significant
slr2026	SGL_RS05470	folP	619.954	0.237645	0.141058	1.68474	0.0920393	0.219973	Not Significant
SGL_RS18430			1692.9	-0.218457	0.129773	-1.68337	0.0923029	0.220457	Not Significant
ssl2250	SGL_RS06755		2932.97	0.167383	0.0996345	1.67997	0.0929635	0.221889	Not Significant
slr0020	SGL_RS13500	recG	2043.35	0.173761	0.103506	1.67875	0.0932001	0.222308	Not Significant
slr1174	SGL_RS11075		5869.68	0.177232	0.105681	1.67704	0.0935349	0.22296	Not Significant
sll0726	SGL_RS17740	pgm	12193.4	-0.17431	0.104113	-1.67424	0.0940828	0.224118	Not Significant
sll0227	SGL_RS02555		9225.14	0.185748	0.111091	1.67204	0.0945174	0.224858	Not Significant
sll1965	SGL_RS06160		810.98	-0.286427	0.171303	-1.67205	0.0945147	0.224858	Not Significant
sll0018	SGL_RS13385	fbaA	310202	-0.168405	0.100891	-1.66917	0.0950828	0.226055	Not Significant
sll1124	SGL_RS05945		7266.37	0.158105	0.0947637	1.66842	0.0952332	0.226117	Not Significant
ssr2754	SGL_RS11665	yefM	2316.85	0.201803	0.12094	1.66861	0.0951941	0.226117	Not Significant
slr1916	SGL_RS04775		3850.73	0.188864	0.113329	1.66651	0.0956128	0.226869	Not Significant
sll1424	SGL_RS09280		1527.77	0.17822	0.107066	1.66457	0.0959976	0.227634	Not Significant
slr1411	SGL_RS02665	larC	2036.66	0.209732	0.126198	1.66193	0.0965276	0.228294	Not Significant
ssr2551	SGL_RS09365		262.02	0.281595	0.169408	1.66223	0.0964662	0.228294	Not Significant
SGL_RS11670			2034.75	0.208417	0.125349	1.66269	0.0963746	0.228294	Not Significant
sll0498	SGL_RS16755		1393.76	0.202853	0.122041	1.66218	0.0964772	0.228294	Not Significant
slr0884	SGL_RS07215	gap1	3485.67	0.174801	0.105282	1.66031	0.0968524	0.228912	Not Significant
slr1667	SGL_RS17925		831.142	0.2473	0.148984	1.65992	0.0969312	0.228949	Not Significant
slr0842	SGL_RS15175		4085.31	0.154226	0.0929611	1.65904	0.0971082	0.229218	Not Significant
sll0567	SGL_RS18290	fur	1943.37	-0.239446	0.14442	-1.65799	0.0973198	0.229568	Not Significant
ssr1766	SGL_RS03700		1510.25	0.198943	0.120038	1.65733	0.0974533	0.229734	Not Significant
sll1481	SGL_RS17555		1995.11	0.196364	0.118602	1.65565	0.0977919	0.230382	Not Significant
slr1693	SGL_RS11265		11281.3	-0.159859	0.0966106	-1.65467	0.0979909	0.230702	Not Significant
sll1823	SGL_RS05700	purA	10586	0.144467	0.0873918	1.6531	0.0983106	0.231304	Not Significant
slr1763	SGL_RS04370		6351.81	-0.190158	0.115078	-1.65243	0.0984472	0.231353	Not Significant
slr1879	SGL_RS07635		304.342	0.272466	0.164894	1.65237	0.098459	0.231353	Not Significant
slr1719	SGL_RS08770	drgA	13972.8	-0.157987	0.0957541	-1.64992	0.098959	0.232227	Not Significant
slr1340	SGL_RS10045		2146.29	-0.172212	0.104358	-1.6502	0.0989014	0.232227	Not Significant
sll1058	SGL_RS02200	dapB	2248.73	-0.164366	0.0996482	-1.64947	0.0990524	0.232296	Not Significant
sll1802	SGL_RS05835	rplB	5965.27	-0.243964	0.14809	-1.6474	0.0994751	0.233137	Not Significant
sml0001	SGL_RS12880	psbI	9129.62	-0.255052	0.154862	-1.64697	0.0995648	0.233196	Not Significant
slr1756	SGL_RS04340	glnA	36911.2	-0.204496	0.124332	-1.64476	0.100019	0.233958	Not Significant
sll1520	SGL_RS11690	recN	686.121	-0.220962	0.13433	-1.64492	0.0999862	0.233958	Not Significant
sll0397	SGL_RS14380		481.481	0.230309	0.140061	1.64435	0.100103	0.234004	Not Significant
SGL_RS18835			2182.25	0.155677	0.0950159	1.63843	0.101331	0.236722	Not Significant
sll0095	SGL_RS15775		1954.75	0.190705	0.116526	1.63659	0.101717	0.23747	Not Significant
SGL_RS19425			76.8657	0.546337	0.333934	1.63606	0.101826	0.237573	Not Significant
SGL_RS20055			1207.81	-0.184305	0.112827	-1.63352	0.10236	0.238665	Not Significant
slr2077	SGL_RS06175		1595.51	-0.176364	0.10824	-1.62938	0.103232	0.240544	Not Significant
sll5094	SGL_RS00440	vapC	188.264	-0.361676	0.2221	-1.62844	0.103432	0.240854	Not Significant
slr0394	SGL_RS11980	pgk	92692.1	-0.195073	0.119866	-1.62742	0.103647	0.2412	Not Significant
ssr2962	SGL_RS04390		1331.02	0.189074	0.116317	1.6255	0.104055	0.24184	Not Significant
slr0918	SGL_RS14865	map	1154.34	0.209079	0.128603	1.62577	0.103999	0.24184	Not Significant
slr0639	SGL_RS14295		1598.23	0.214187	0.131862	1.62433	0.104305	0.242265	Not Significant
sll0898	SGL_RS16860	rsgA	2054.85	-0.173897	0.107087	-1.62389	0.104399	0.242329	Not Significant
ssl0350	SGL_RS14645		916.06	-0.216626	0.133454	-1.62323	0.104541	0.242504	Not Significant
sll1377	SGL_RS10570		10226.4	0.147528	0.0909423	1.62222	0.104756	0.242847	Not Significant
sll0135	SGL_RS12240	mtnP	2165.28	0.216956	0.134003	1.61904	0.105439	0.244274	Not Significant
slr2004	SGL_RS08680		20944.4	-0.245433	0.151726	-1.61761	0.105747	0.244674	Not Significant
ssl1255	SGL_RS16385		1724.46	-0.177413	0.109662	-1.61782	0.105701	0.244674	Not Significant
ssl2615	SGL_RS02695	atpE	48055.7	-0.171069	0.105804	-1.61685	0.10591	0.244741	Not Significant
slr5022	SGL_RS00105		974.856	-0.183874	0.113715	-1.61697	0.105884	0.244741	Not Significant
slr1378	SGL_RS05005		3719.43	0.183366	0.113639	1.61358	0.106618	0.246218	Not Significant
sll0261	SGL_RS11890		1281.39	0.252857	0.156843	1.61217	0.106925	0.246771	Not Significant
slr7081	SGL_RS01005		2610.87	0.231458	0.143638	1.6114	0.107092	0.247	Not Significant
slr1063	SGL_RS03620		22316.3	-0.154987	0.0962011	-1.61108	0.107163	0.247006	Not Significant
SGL_RS19590			1901.77	-0.190965	0.11877	-1.60786	0.107867	0.248471	Not Significant
sll7031	SGL_RS00760		892.179	-0.270609	0.169094	-1.60034	0.109523	0.252125	Not Significant
sll1076	SGL_RS05605		2736.01	0.157332	0.0983655	1.59947	0.109717	0.252345	Not Significant
slr0323	SGL_RS12555		5359.63	-0.219002	0.136964	-1.59897	0.109827	0.252345	Not Significant
slr5105	SGL_RS00490		635.632	-0.196937	0.123154	-1.59911	0.109795	0.252345	Not Significant
slr0397	SGL_RS12010		2612.42	0.180664	0.113103	1.59733	0.110192	0.252862	Not Significant
sll1861	SGL_RS12325		181.176	0.311444	0.194954	1.59753	0.110148	0.252862	Not Significant
slr2009	SGL_RS05365		6404.78	0.189732	0.11881	1.59693	0.110281	0.252908	Not Significant
slr0981	SGL_RS03535		11345.4	0.152985	0.0959267	1.59481	0.110754	0.253511	Not Significant
slr1644	SGL_RS11640		8504.84	-0.156695	0.0982505	-1.59486	0.110744	0.253511	Not Significant
sll0098	SGL_RS15750	rlmN	3541.48	0.172448	0.108107	1.59515	0.110678	0.253511	Not Significant
sll1263	SGL_RS09985		2342.99	-0.202859	0.127298	-1.59357	0.111031	0.253986	Not Significant
sll1159	SGL_RS08350		1112.71	-0.186262	0.116907	-1.59325	0.111105	0.253993	Not Significant
sml0005	SGL_RS04440	psbK	21899.5	-0.200705	0.126119	-1.59139	0.111522	0.254223	Not Significant
sll1285	SGL_RS05175	cofG	636.231	0.20408	0.128222	1.59161	0.111472	0.254223	Not Significant
slr1228	SGL_RS06700	prfC	5724.13	0.168513	0.1059	1.59124	0.111555	0.254223	Not Significant
slr0890	SGL_RS07275		1724.62	-0.162161	0.101849	-1.59217	0.111346	0.254223	Not Significant
slr0006	SGL_RS13400		9348.11	-0.190418	0.119584	-1.59233	0.11131	0.254223	Not Significant
slr1522	SGL_RS09405		919.089	0.199828	0.125671	1.59009	0.111816	0.254496	Not Significant
sll0623	SGL_RS17335		4043.63	0.165441	0.104044	1.59011	0.111811	0.254496	Not Significant
slr2049	SGL_RS04655	cpcS2	4967.09	0.16284	0.102556	1.58781	0.112328	0.255503	Not Significant
sll0415	SGL_RS13685		2517.56	-0.17634	0.111137	-1.58669	0.112583	0.255921	Not Significant
slr1280	SGL_RS10730	ndhK1	6816.4	0.160475	0.10116	1.58635	0.11266	0.255936	Not Significant
sll1834	SGL_RS04765		2914.56	-0.190964	0.120518	-1.58452	0.113075	0.256397	Not Significant
slr1934	SGL_RS12345	pdhA	4896.35	-0.190133	0.119975	-1.58477	0.113018	0.256397	Not Significant
slr7014	SGL_RS00695	cas6	275.308	-0.257762	0.162665	-1.58462	0.113053	0.256397	Not Significant
sll0995	SGL_RS04860		3779.45	0.175822	0.111162	1.58166	0.113726	0.2576	Not Significant
SGL_RS05265			105.569	0.43877	0.277481	1.58126	0.113818	0.2576	Not Significant
ssl5114	SGL_RS00540		2129.4	-0.154388	0.0976286	-1.58138	0.113792	0.2576	Not Significant
ssr5020	SGL_RS00095		347.555	0.302702	0.19204	1.57624	0.114969	0.260043	Not Significant
slr2079	SGL_RS09060	glsA	2881.98	-0.217986	0.138339	-1.57574	0.115087	0.260146	Not Significant
sll7089	SGL_RS01045		1317.08	-0.211078	0.133993	-1.5753	0.115188	0.260214	Not Significant
slr1598	SGL_RS04060	lipA1	4640.18	0.168867	0.107225	1.57489	0.115282	0.260263	Not Significant
SGL_RS19445			1277.07	-0.194022	0.12327	-1.57396	0.115496	0.260441	Not Significant
slr0337	SGL_RS12655		2400.61	0.169701	0.10782	1.57393	0.115504	0.260441	Not Significant
sll1605	SGL_RS08755	fabZ	1778.38	-0.170517	0.108366	-1.57352	0.115598	0.26049	Not Significant
sll0603	SGL_RS14335	menD	3089.29	0.176228	0.112031	1.57302	0.115713	0.260589	Not Significant
sll1559	SGL_RS11200		15835.2	-0.210948	0.134249	-1.57132	0.116109	0.261155	Not Significant
slr1456	SGL_RS17165		729.581	0.190003	0.120915	1.57137	0.116096	0.261155	Not Significant
slr0106	SGL_RS15730		1571.52	0.177305	0.112954	1.56972	0.116481	0.261829	Not Significant
slr0585	SGL_RS18195	argG	10239.1	-0.165953	0.105756	-1.5692	0.1166	0.261936	Not Significant
sll5049	SGL_RS00220		2975.9	-0.19627	0.125108	-1.5688	0.116694	0.261985	Not Significant
slr1864	SGL_RS07470		2348.85	-0.166671	0.106377	-1.56679	0.117163	0.262726	Not Significant
sll0541	SGL_RS15040		87521.1	0.237851	0.15181	1.56677	0.11717	0.262726	Not Significant
sll1341	SGL_RS17065	bfr	6900.75	0.156215	0.0997492	1.56608	0.117331	0.262925	Not Significant
slr2105	SGL_RS09230		4498.57	0.151911	0.0972604	1.5619	0.118311	0.264958	Not Significant
slr1052	SGL_RS04255		596.423	0.196174	0.125634	1.56147	0.118414	0.265025	Not Significant
slr0420	SGL_RS14470		17870.8	-0.190441	0.122164	-1.55889	0.119022	0.266222	Not Significant
slr1206	SGL_RS06040		1867.88	0.190343	0.12228	1.55661	0.119562	0.267266	Not Significant
slr0264	SGL_RS08935		1499.1	0.174499	0.112151	1.55593	0.119725	0.267465	Not Significant
slr0676	SGL_RS03840	cysC	2668.2	0.163557	0.105196	1.55478	0.119999	0.267582	Not Significant
ssl1918	SGL_RS04320		1147.69	0.177415	0.114089	1.55506	0.119932	0.267582	Not Significant
sll0396	SGL_RS14385		1515.18	0.194355	0.124967	1.55525	0.119886	0.267582	Not Significant
sll0329	SGL_RS12985	gnd	25564.8	0.135744	0.0873425	1.55416	0.120147	0.267747	Not Significant
SGL_RS19585			11106	0.174319	0.112261	1.5528	0.120471	0.268256	Not Significant
sll0031	SGL_RS16545		1773.84	0.153839	0.0990858	1.55258	0.120523	0.268256	Not Significant
slr0742	SGL_RS02465	rimP	1603.36	0.169794	0.109431	1.55161	0.120757	0.268447	Not Significant
sll0474	SGL_RS15510		2086.26	0.180733	0.116469	1.55177	0.120717	0.268447	Not Significant
sll1629	SGL_RS08020	cry	1257.94	-0.196466	0.126679	-1.5509	0.120925	0.268657	Not Significant
sll1187	SGL_RS03335	lgt	6288.78	-0.164567	0.106199	-1.54961	0.121235	0.26918	Not Significant
slr0242	SGL_RS02520	bcp	2917.09	0.147472	0.0953018	1.54742	0.121762	0.270186	Not Significant
slr0089	SGL_RS15350		2320	0.191775	0.124031	1.54618	0.122061	0.270684	Not Significant
slr1364	SGL_RS07055	bioB	4392.32	-0.154716	0.10011	-1.54546	0.122235	0.270904	Not Significant
sll1899	SGL_RS10195	ctaB	7338.2	0.149541	0.0968375	1.54425	0.122529	0.271058	Not Significant
sll1875	SGL_RS10385	pbsA2	972.034	-0.171215	0.110856	-1.54448	0.122473	0.271058	Not Significant
slr0794	SGL_RS16065		2597.86	-0.253124	0.163851	-1.54484	0.122385	0.271058	Not Significant
sll0812	SGL_RS09880		1745.18	-0.187516	0.121541	-1.54282	0.122875	0.271372	Not Significant
sll1251	SGL_RS10090		1525.67	0.243072	0.157527	1.54305	0.122819	0.271372	Not Significant
slr0652	SGL_RS17225	hisA	1275.84	0.158037	0.10244	1.54273	0.122895	0.271372	Not Significant
slr0896	SGL_RS14765	norM	770.203	0.18482	0.119886	1.54164	0.123162	0.271796	Not Significant
slr1380	SGL_RS05015	cydB	2852.23	0.248481	0.161246	1.54101	0.123315	0.271967	Not Significant
slr1102	SGL_RS02810		8894.8	0.137319	0.0891534	1.54026	0.123498	0.272071	Not Significant
slr1592	SGL_RS04000		390.276	0.260959	0.169466	1.53989	0.123587	0.272071	Not Significant
slr0936	SGL_RS11305	nadC	842.847	0.183265	0.119001	1.54003	0.123553	0.272071	Not Significant
ssr2130	SGL_RS10770		417.556	-0.276465	0.180296	-1.53339	0.12518	0.275411	Not Significant
slr0093	SGL_RS15370		1015.89	0.193289	0.126294	1.53047	0.1259	0.276827	Not Significant
slr0211	SGL_RS14700		18131.8	0.136638	0.0893402	1.52941	0.126162	0.277143	Not Significant
ssl1552	SGL_RS15135		2116.26	0.175665	0.114868	1.52928	0.126196	0.277143	Not Significant
slr2143	SGL_RS07815		675.133	-0.188249	0.123209	-1.52788	0.126542	0.277733	Not Significant
slr0662	SGL_RS17330	speA1	4588.3	0.149568	0.0979837	1.52646	0.126895	0.278341	Not Significant
slr1697	SGL_RS11280	spkB	5260.48	0.150523	0.0987201	1.52474	0.127324	0.278944	Not Significant
slr0184	SGL_RS12835		1534.56	0.187268	0.122799	1.52499	0.127261	0.278944	Not Significant
slr0773	SGL_RS13035		7190.95	0.202276	0.132752	1.52371	0.12758	0.279337	Not Significant
sll1087	SGL_RS11060		5571.25	-0.157525	0.103408	-1.52334	0.127673	0.279372	Not Significant
SGL_RS19435			209.222	-0.278564	0.183121	-1.52121	0.128208	0.280373	Not Significant
slr0616	SGL_RS15600		1560.25	0.187668	0.123487	1.51974	0.128575	0.281007	Not Significant
slr1721	SGL_RS08780		3707.16	-0.144589	0.0952819	-1.51749	0.129144	0.282079	Not Significant
slr6110	SGL_RS01365		58475.7	-0.152288	0.100383	-1.51707	0.12925	0.282142	Not Significant
slr1044	SGL_RS04210		15393.4	-0.14193	0.0938113	-1.51293	0.130298	0.284258	Not Significant
sll1837	SGL_RS04740		5982.16	-0.193433	0.127897	-1.51241	0.130429	0.284347	Not Significant
sll1470	SGL_RS17620	leuC	3066.11	0.162136	0.107222	1.51215	0.130495	0.284347	Not Significant
SGL_RS18395			1.02561e+06	-0.193873	0.12838	-1.51014	0.131007	0.28469	Not Significant
slr1076	SGL_RS03685		17193.4	0.144977	0.0959868	1.51039	0.130944	0.28469	Not Significant
sll1268	SGL_RS07115		12880.3	0.143203	0.0948371	1.50999	0.131045	0.28469	Not Significant
ssr1558	SGL_RS16840		121.642	0.332055	0.219885	1.51013	0.13101	0.28469	Not Significant
SGL_RS17855			131.545	0.322566	0.213479	1.511	0.130788	0.28469	Not Significant
sll1389	SGL_RS10460		412.847	0.218836	0.145041	1.50879	0.131353	0.285187	Not Significant
slr0533	SGL_RS16660		343.077	0.218259	0.144979	1.50545	0.132208	0.286871	Not Significant
sll0067	SGL_RS13850		3564.15	0.151671	0.100882	1.50345	0.132724	0.28782	Not Significant
slr0978	SGL_RS03525		11343.6	0.158347	0.105518	1.50067	0.133442	0.289031	Not Significant
slr1187	SGL_RS18165		8762.79	-0.138327	0.0921761	-1.50069	0.133437	0.289031	Not Significant
sll0427	SGL_RS11735	psbO	235107	-0.173583	0.115696	-1.50034	0.133525	0.28904	Not Significant
slr0744	SGL_RS02480	infB	15612.7	0.150763	0.100535	1.49961	0.133716	0.289107	Not Significant
sll1716	SGL_RS06390		832.527	0.191812	0.127908	1.49961	0.133715	0.289107	Not Significant
sll0248	SGL_RS08960	fldA	80.7938	-0.430639	0.287266	-1.49909	0.133849	0.289223	Not Significant
slr1055	SGL_RS04275		34566.1	-0.17047	0.11381	-1.49785	0.134173	0.289241	Not Significant
sll1369	SGL_RS10615		1032.72	0.219287	0.146353	1.49834	0.134046	0.289241	Not Significant
slr0442	SGL_RS11695		27582.2	-0.146738	0.0979672	-1.49783	0.134177	0.289241	Not Significant
slr0537	SGL_RS16690		4188.83	-0.231517	0.154515	-1.49834	0.134045	0.289241	Not Significant
sll1613	SGL_RS08705		3005.17	-0.144985	0.0968665	-1.49675	0.134458	0.289676	Not Significant
slr1440	SGL_RS06880		510.736	0.198697	0.132819	1.496	0.134655	0.289928	Not Significant
SGL_RS19750			18.0865	0.773626	0.517386	1.49526	0.134847	0.29017	Not Significant
sll1831	SGL_RS04800		3707.13	-0.143188	0.0958047	-1.49458	0.135024	0.290379	Not Significant
sll0993	SGL_RS04870		1255.13	0.159936	0.107135	1.49285	0.135478	0.29118	Not Significant
slr0152	SGL_RS12145		1808.37	0.175131	0.117399	1.49176	0.135763	0.291621	Not Significant
slr1247	SGL_RS08390	pstS	68263.8	0.534405	0.358411	1.49104	0.135951	0.291853	Not Significant
slr0904	SGL_RS14815		3267.29	0.137715	0.092502	1.48878	0.136545	0.292953	Not Significant
sll1940	SGL_RS04595		1074.55	-0.218475	0.146854	-1.48771	0.136829	0.293389	Not Significant
sll1710	SGL_RS07835		453.823	0.20382	0.137191	1.48567	0.137367	0.29437	Not Significant
sll0855	SGL_RS08170	clcA	1528.93	-0.169484	0.114118	-1.48516	0.137502	0.294485	Not Significant
slr0351	SGL_RS13265		4967.09	-0.133852	0.0901736	-1.48438	0.137707	0.29475	Not Significant
sll0519	SGL_RS17000	ndhA	32069.7	-0.131361	0.0886306	-1.48212	0.138308	0.295862	Not Significant
slr1920	SGL_RS04815		10766.8	-0.729478	0.492795	-1.48029	0.138796	0.296732	Not Significant
slr1978	SGL_RS10365		2808.47	0.145751	0.0985531	1.47891	0.139165	0.29717	Not Significant
sll0051	SGL_RS13990		15597.2	-0.142586	0.0964013	-1.47909	0.139117	0.29717	Not Significant
slr1791	SGL_RS03060	cysH	2145.14	0.149843	0.101396	1.47781	0.139459	0.297623	Not Significant
sll1988	SGL_RS09090	hslO	2091.57	0.17055	0.115527	1.47628	0.139868	0.298318	Not Significant
sll1059	SGL_RS02195	adk2	1522.73	-0.177711	0.120525	-1.47448	0.140352	0.298486	Not Significant
sll1594	SGL_RS08845		3339.7	0.175488	0.119043	1.47416	0.14044	0.298486	Not Significant
SGL_RS19230			34.1321	-0.552477	0.374478	-1.47533	0.140125	0.298486	Not Significant
slr1940	SGL_RS12415		2720.98	-0.155656	0.105567	-1.47447	0.140354	0.298486	Not Significant
sll0337	SGL_RS12905		1137.59	0.176635	0.119761	1.47489	0.140242	0.298486	Not Significant
slr8026	SGL_RS01255		877.128	-0.210663	0.142889	-1.47431	0.140397	0.298486	Not Significant
slr0757	SGL_RS17755	kaiB1	2158.73	-0.192124	0.130548	-1.47167	0.14111	0.299644	Not Significant
ssr8013	SGL_RS01190		1396.59	-0.153857	0.104557	-1.47152	0.14115	0.299644	Not Significant
slr0194	SGL_RS14580	rpiA	7293.7	-0.149809	0.101893	-1.47027	0.14149	0.30019	Not Significant
sll1845	SGL_RS12425		1924.09	0.157011	0.106821	1.46985	0.141603	0.300254	Not Significant
slr1751	SGL_RS06625		21777.4	0.13475	0.0917622	1.46847	0.141976	0.30087	Not Significant
slr0505	SGL_RS15435		598.119	0.193969	0.132234	1.46686	0.142413	0.301619	Not Significant
sll1203	SGL_RS01965		319.914	-0.232287	0.158698	-1.4637	0.143275	0.302429	Not Significant
sll1917	SGL_RS05455	hemW	129.877	0.309771	0.211695	1.46329	0.143389	0.302429	Not Significant
slr1535	SGL_RS06420		24651.1	0.159818	0.109143	1.46431	0.14311	0.302429	Not Significant
sll1902	SGL_RS08670		746.214	-0.185778	0.127005	-1.46276	0.143532	0.302429	Not Significant
sll1423	SGL_RS09285	ntcA	8123.9	0.128564	0.0878611	1.46326	0.143395	0.302429	Not Significant
ssr1386	SGL_RS09885	ndhL	13880.5	-0.144417	0.0986589	-1.4638	0.143249	0.302429	Not Significant
slr0646	SGL_RS14350	dacB	1288.83	0.215271	0.147172	1.46271	0.143545	0.302429	Not Significant
slr0668	SGL_RS17375		317.847	-0.297853	0.203411	-1.46429	0.143114	0.302429	Not Significant
slr1185	SGL_RS18155	petC1	896.79	0.204077	0.139388	1.4641	0.143168	0.302429	Not Significant
slr1647	SGL_RS11655	fetB	517.557	-0.210334	0.144077	-1.45987	0.144325	0.303895	Not Significant
SGL_RS16025			303.66	0.273264	0.187702	1.45584	0.145437	0.306059	Not Significant
sll1886	SGL_RS10310		5508.41	0.157347	0.108112	1.45541	0.145557	0.306133	Not Significant
slr0775	SGL_RS13055	secF	5092.01	-0.14045	0.0965835	-1.45418	0.145895	0.306668	Not Significant
sll0842	SGL_RS08250		989.362	0.198223	0.136377	1.45349	0.146089	0.306832	Not Significant
sll1181	SGL_RS10625		34864.7	-0.157408	0.108312	-1.45329	0.146143	0.306832	Not Significant
slr1722	SGL_RS08785		10107.9	-0.137441	0.0946037	-1.45281	0.146276	0.306935	Not Significant
slr0511	SGL_RS15470		123.081	0.320486	0.220831	1.45128	0.146703	0.307652	Not Significant
sll0436	SGL_RS18030		946.94	0.185977	0.128278	1.4498	0.147114	0.308337	Not Significant
sll0416	SGL_RS13680	groEL2	22629.6	-0.249757	0.172535	-1.44757	0.147738	0.309454	Not Significant
slr1661	SGL_RS17875		8709.83	-0.172906	0.11947	-1.44728	0.147818	0.309454	Not Significant
slr2034	SGL_RS04525	ycf48	6818.12	0.156207	0.108107	1.44493	0.148476	0.309538	Not Significant
sll1070	SGL_RS05660	tkt	103925	-0.160011	0.110717	-1.44522	0.148396	0.309538	Not Significant
ssr2611	SGL_RS06540		1570.9	-0.146176	0.101116	-1.44562	0.148284	0.309538	Not Significant
slr1251	SGL_RS08410		5294.45	-0.194814	0.134691	-1.44637	0.148073	0.309538	Not Significant
sll1908	SGL_RS08600	serA	15492.1	-0.128232	0.0886925	-1.44581	0.148231	0.309538	Not Significant
slr0608	SGL_RS18375	hisI	2149.05	0.257933	0.178536	1.4447	0.148541	0.309538	Not Significant
slr5037	SGL_RS00165		67.4527	-0.598096	0.413744	-1.44557	0.148297	0.309538	Not Significant
ssr6046	SGL_RS01580		1267.14	-0.194784	0.134731	-1.44572	0.148255	0.309538	Not Significant
slr1772	SGL_RS02910		1774.13	0.161769	0.112024	1.44406	0.148723	0.309642	Not Significant
ssl0259	SGL_RS12180		2015.71	-0.162298	0.112401	-1.44392	0.148761	0.309642	Not Significant
slr1959	SGL_RS10205		1302.16	-0.209267	0.144997	-1.44325	0.14895	0.309857	Not Significant
ST6803t06	SGL_RS03980		71.3967	0.404073	0.280279	1.44168	0.149392	0.31049	Not Significant
slr0634	SGL_RS14265		1697.26	0.151922	0.105387	1.44156	0.149425	0.31049	Not Significant
sll0939	SGL_RS03405		175.492	-0.269118	0.187026	-1.43893	0.15017	0.311858	Not Significant
ssr1698	SGL_RS04855		839.67	-0.266741	0.185489	-1.43804	0.150422	0.312025	Not Significant
slr0549	SGL_RS16920	asd	5408.53	0.186989	0.130012	1.43824	0.150365	0.312025	Not Significant
ssr2016	SGL_RS06050		105.914	-0.36994	0.257315	-1.43769	0.150521	0.312051	Not Significant
SGL_RS19535			37.918	-0.554695	0.386202	-1.43628	0.150921	0.312703	Not Significant
ssl1464	SGL_RS16130		554.23	0.185294	0.129038	1.43596	0.151015	0.312718	Not Significant
slr0347	SGL_RS13235		2032.26	-0.146169	0.101936	-1.43392	0.151595	0.313739	Not Significant
slr1066	SGL_RS03635		14689.6	-0.128431	0.089612	-1.4332	0.151802	0.31399	Not Significant
slr1543	SGL_RS06455		893.987	0.184619	0.128929	1.43195	0.152159	0.314549	Not Significant
sll0163	SGL_RS12775		6729.62	0.179999	0.125952	1.42911	0.152972	0.31605	Not Significant
ST6803t18	SGL_RS10010		343.079	0.276639	0.193751	1.42781	0.153347	0.316464	Not Significant
sll0080	SGL_RS15325	argC	18501.1	0.15244	0.106745	1.42807	0.153271	0.316464	Not Significant
sll1852	SGL_RS12365	ndk	5477.62	0.194547	0.136329	1.42704	0.153569	0.316741	Not Significant
slr0044	SGL_RS16585	cmpD	486.153	0.184455	0.12929	1.42667	0.153676	0.316781	Not Significant
slr1906	SGL_RS04710		1543.32	0.163912	0.11493	1.42619	0.153813	0.316884	Not Significant
slr1216	SGL_RS06105	mgtE	4221.98	-0.165861	0.116419	-1.42468	0.154249	0.317231	Not Significant
slr1932	SGL_RS12310		7730.77	0.13657	0.0958452	1.4249	0.154185	0.317231	Not Significant
SGL_RS13755			375.725	0.233725	0.164068	1.42457	0.154283	0.317231	Not Significant
sll0550	SGL_RS14955	dfa1	20137.4	0.148126	0.103992	1.4244	0.154331	0.317231	Not Significant
sll1560	SGL_RS11185		52.5011	-0.515311	0.362264	-1.42247	0.154889	0.318197	Not Significant
sll0886	SGL_RS14755		1974.83	-0.185454	0.130678	-1.41917	0.15585	0.31999	Not Significant
slr1821	SGL_RS07995	rseP	8079.43	0.182434	0.128645	1.41813	0.156154	0.320433	Not Significant
slr1248	SGL_RS08395	pstC	17157	0.586535	0.413879	1.41716	0.156435	0.320829	Not Significant
slr0257	SGL_RS02655		13326.2	0.145905	0.103122	1.41488	0.157103	0.322017	Not Significant
slr0758	SGL_RS17760	kaiC1	5802.49	-0.166717	0.118089	-1.4118	0.15801	0.32351	Not Significant
slr0598	SGL_RS18315		2424.07	0.152853	0.108265	1.41184	0.157998	0.32351	Not Significant
slr0483	SGL_RS14075		87269.9	0.151791	0.107548	1.41138	0.158134	0.323581	Not Significant
sll1033	SGL_RS02865		7633.19	0.14776	0.104797	1.40997	0.158549	0.324007	Not Significant
slr1233	SGL_RS06730		3428.73	0.14523	0.103016	1.40978	0.158604	0.324007	Not Significant
sll1957	SGL_RS08520		1039.27	-0.203034	0.144025	-1.40971	0.158625	0.324007	Not Significant
sll0361	SGL_RS11995		550.219	0.186048	0.132	1.40946	0.158699	0.324007	Not Significant
SGL_RS19370			87.3582	-0.369578	0.262882	-1.40587	0.159763	0.325995	Not Significant
slr0457	SGL_RS18050	truB	260.041	0.241326	0.171721	1.40534	0.159922	0.326136	Not Significant
slr1577	SGL_RS17515	scpB	1071.74	-0.210929	0.150135	-1.40493	0.160043	0.3262	Not Significant
slr1265	SGL_RS10640	rpoC1	36674.9	0.13486	0.09624	1.40129	0.161129	0.328228	Not Significant
sll1609	SGL_RS08730		4914.21	-0.169969	0.121331	-1.40087	0.161252	0.328296	Not Significant
SGL_RS19395			43.8132	-0.500021	0.357071	-1.40034	0.161411	0.328435	Not Significant
sll0514	SGL_RS16630		10529.2	0.194549	0.139005	1.39958	0.161638	0.328712	Not Significant
sll1019	SGL_RS03800	gloB	604.781	-0.170848	0.122153	-1.39864	0.161921	0.329103	Not Significant
sll8040	SGL_RS01320		1083.67	-0.167669	0.11992	-1.39818	0.16206	0.329201	Not Significant
ssl2749	SGL_RS09425		240.937	0.263792	0.188781	1.39734	0.162311	0.329526	Not Significant
slr1377	SGL_RS05000	lepB	2854.22	0.131467	0.0941428	1.39647	0.162574	0.329877	Not Significant
slr1566	SGL_RS17450		913.233	0.164535	0.117914	1.39538	0.1629	0.330353	Not Significant
slr1911	SGL_RS04735		1449.3	-0.166276	0.119234	-1.39453	0.163157	0.330689	Not Significant
ssl2923	SGL_RS04125		581.78	-0.210314	0.150925	-1.3935	0.163469	0.331136	Not Significant
sll1796	SGL_RS05875	petJ	4571.93	0.223608	0.160632	1.39205	0.163907	0.331652	Not Significant
slr2072	SGL_RS06140	ilvA	2107.51	0.143219	0.102879	1.39211	0.16389	0.331652	Not Significant
slr1568	SGL_RS17465		703.804	0.180359	0.129683	1.39076	0.164297	0.332257	Not Significant
sll0635	SGL_RS03970	thiE	430.053	0.190609	0.137322	1.38804	0.165125	0.333588	Not Significant
slr0954	SGL_RS11435	mrnC	10512.3	0.197098	0.142002	1.38799	0.165139	0.333588	Not Significant
sll0864	SGL_RS07290		240.792	0.227119	0.163795	1.3866	0.165563	0.334259	Not Significant
slr0306	SGL_RS15915		2436.37	-0.189492	0.13673	-1.38588	0.165782	0.334515	Not Significant
slr0600	SGL_RS18325		3391.26	0.175435	0.126665	1.38503	0.166044	0.334857	Not Significant
slr6063	SGL_RS01655		846.626	0.186104	0.134405	1.38465	0.16616	0.334905	Not Significant
slr1096	SGL_RS02780	lpdA	7950.81	-0.120597	0.0871851	-1.38323	0.166593	0.335375	Not Significant
SGL_RS19975			13.037	-0.845443	0.611458	-1.38267	0.166767	0.335375	Not Significant
sll0688	SGL_RS14160		378.985	0.220981	0.159725	1.38351	0.166508	0.335375	Not Significant
slr0195	SGL_RS14585		313.656	-0.230896	0.167049	-1.38221	0.166908	0.335375	Not Significant
sll0030	SGL_RS16560	cmpR	499.708	-0.1864	0.134805	-1.38273	0.166747	0.335375	Not Significant
sll0447	SGL_RS17975		1620.21	-0.137809	0.0997117	-1.38208	0.166948	0.335375	Not Significant
sll1223	SGL_RS09745	hoxU	3179.08	0.141747	0.102646	1.38092	0.167302	0.335901	Not Significant
sll1138	SGL_RS06685		1323.84	0.157299	0.11419	1.37753	0.168349	0.337816	Not Significant
sll0173	SGL_RS12735		6993.36	0.136531	0.0992347	1.37584	0.168872	0.338677	Not Significant
sll0720	SGL_RS17785		57.2186	0.557076	0.405029	1.3754	0.169008	0.338764	Not Significant
sll1054	SGL_RS02230		401.859	0.228285	0.166079	1.37456	0.169268	0.339098	Not Significant
sll0167	SGL_RS12765		2168.08	0.169297	0.123262	1.37348	0.169603	0.339552	Not Significant
SGL_RS00480			98.6466	-0.334832	0.243829	-1.37322	0.169683	0.339552	Not Significant
slr1773	SGL_RS02920		1192.91	0.155621	0.113358	1.37282	0.169808	0.339615	Not Significant
SGL_RS18970			26.7747	0.676892	0.493976	1.37029	0.170595	0.341002	Not Significant
sll1327	SGL_RS02670	atpG	38560.1	-0.180165	0.131849	-1.36645	0.171798	0.342812	Not Significant
SGL_RS18670			1392.68	0.187934	0.13756	1.36619	0.171879	0.342812	Not Significant
ssr1399	SGL_RS15080	rpsR	6415.94	-0.178169	0.130335	-1.367	0.171625	0.342812	Not Significant
slr0713	SGL_RS16370	tgt	3453.57	-0.130797	0.0957039	-1.36668	0.171725	0.342812	Not Significant
sll1621	SGL_RS08075		64217.1	0.122693	0.0898877	1.36496	0.172265	0.343394	Not Significant
slr2048	SGL_RS04650		2722.85	0.180951	0.132666	1.36396	0.172579	0.343832	Not Significant
sll1942	SGL_RS04575		10874.8	-0.118613	0.0870879	-1.362	0.173199	0.344361	Not Significant
sll1276	SGL_RS07030		2064.04	0.138397	0.10158	1.36244	0.173058	0.344361	Not Significant
slr1261	SGL_RS08485		1411.94	0.218108	0.160148	1.36192	0.173225	0.344361	Not Significant
sll0368	SGL_RS14540	pyrR	4772.63	-0.14928	0.109602	-1.36203	0.173189	0.344361	Not Significant
slr6049	SGL_RS01595		1899.65	-0.147701	0.108573	-1.36039	0.173706	0.345129	Not Significant
slr1295	SGL_RS03245	futA1	2119.87	-0.229236	0.168709	-1.35877	0.174219	0.34577	Not Significant
sll1086	SGL_RS11065		6818.12	0.1978	0.145554	1.35894	0.174164	0.34577	Not Significant
sll0044	SGL_RS16470		515.522	0.181544	0.133662	1.35823	0.174391	0.345921	Not Significant
sll0621	SGL_RS17345		3818.5	0.204452	0.150786	1.3559	0.17513	0.347198	Not Significant
slr1225	SGL_RS06680	spkF	2406.54	0.137733	0.10167	1.3547	0.175512	0.347765	Not Significant
slr0798	SGL_RS16100	ziaA	3962.2	-0.172143	0.127135	-1.35402	0.175729	0.348006	Not Significant
sll1749a	SGL_RS04490		3239.68	-0.136718	0.101073	-1.35267	0.17616	0.348669	Not Significant
slr0965	SGL_RS03390	dnaN	1018.75	0.159656	0.118138	1.35143	0.176556	0.349104	Not Significant
slr0590	SGL_RS18230		1453.78	-0.140475	0.103949	-1.35138	0.176573	0.349104	Not Significant
sll0994	SGL_RS04865		897.219	-0.158092	0.117208	-1.34882	0.177395	0.35054	Not Significant
SGL_RS08760			180.501	0.253417	0.187982	1.34809	0.177629	0.350811	Not Significant
slr0552	SGL_RS16935		7676.54	0.1231	0.0913652	1.34734	0.177872	0.351098	Not Significant
slr1319	SGL_RS01945		731.007	0.165135	0.122686	1.346	0.178303	0.351567	Not Significant
sll1057	SGL_RS02205		2347.09	0.173102	0.128596	1.34609	0.178272	0.351567	Not Significant
slr0314	SGL_RS15975		765.361	0.185208	0.137796	1.34407	0.178924	0.352527	Not Significant
ST6803r05	SGL_RS17260		1035.25	-0.563209	0.419089	-1.34389	0.178984	0.352527	Not Significant
slr1024	SGL_RS04885		2144.79	0.159811	0.119039	1.34251	0.17943	0.353213	Not Significant
sll1363	SGL_RS17215	ilvC	32365.9	-0.133649	0.0996345	-1.3414	0.179792	0.353734	Not Significant
slr1081	SGL_RS03725		8801.58	0.130453	0.0972862	1.34092	0.179945	0.353844	Not Significant
sll0268	SGL_RS11855		4810.39	-0.150156	0.112047	-1.34011	0.180209	0.353979	Not Significant
sll0456	SGL_RS14115		2783.36	-0.131372	0.0980139	-1.34034	0.180135	0.353979	Not Significant
slr1884	SGL_RS07690	trpS	1718.16	0.155711	0.116254	1.33941	0.180438	0.354236	Not Significant
slr0575	SGL_RS15025		4279.38	-0.145899	0.108968	-1.33892	0.180595	0.354354	Not Significant
slr1048	SGL_RS04230	sbcC	4018.08	-0.132393	0.0989464	-1.33803	0.180888	0.354545	Not Significant
sll1631	SGL_RS08010	tadA	675.951	0.160473	0.119925	1.33811	0.180862	0.354545	Not Significant
sll1063	SGL_RS02155	tsaB	1102.28	0.179229	0.133996	1.33757	0.181037	0.354645	Not Significant
sll1746	SGL_RS06195	rplL	34779.4	-0.225899	0.16893	-1.33723	0.181147	0.354669	Not Significant
SGL_RS06155			755.66	-0.158959	0.11891	-1.3368	0.181286	0.354702	Not Significant
slr1426	SGL_RS17075	recR	1859.3	0.167077	0.125004	1.33658	0.181359	0.354702	Not Significant
ssr1480	SGL_RS07155		62288.2	0.126111	0.0944676	1.33496	0.181889	0.355164	Not Significant
sll1340	SGL_RS17070		583.111	0.169454	0.126901	1.33532	0.181771	0.355164	Not Significant
slr7098	SGL_RS01090		184.084	-0.302955	0.226901	-1.33519	0.181816	0.355164	Not Significant
sll0257	SGL_RS11950	tsaE	444.564	0.198503	0.148814	1.33391	0.182235	0.355647	Not Significant
slr1188	SGL_RS18170		2448.17	0.146936	0.110219	1.33313	0.182489	0.355952	Not Significant
sll1233	SGL_RS09680		2289.86	-0.1278	0.0959066	-1.33254	0.182681	0.356135	Not Significant
slr1664	SGL_RS17885		5944.88	-0.170001	0.127737	-1.33086	0.183235	0.357022	Not Significant
sll0644	SGL_RS03910		1373.68	-0.144937	0.109029	-1.32934	0.183736	0.357623	Not Significant
sll0449	SGL_RS17965		618.117	-0.191548	0.144094	-1.32933	0.18374	0.357623	Not Significant
slr1923	SGL_RS12255		2137.95	0.135824	0.102349	1.32706	0.184487	0.358885	Not Significant
sll1212	SGL_RS01905	gmd	11451.8	-0.129094	0.0973861	-1.32559	0.184975	0.35964	Not Significant
slr0656	SGL_RS17280		5658.85	0.145031	0.109449	1.32509	0.18514	0.359769	Not Significant
slr2013	SGL_RS05395		1620.04	0.16129	0.121759	1.32467	0.185282	0.359851	Not Significant
SGL_RS13760			5190.59	0.121636	0.0919379	1.32302	0.185828	0.360719	Not Significant
sll1660	SGL_RS03155		897.447	0.16255	0.122998	1.32156	0.186313	0.361468	Not Significant
slr1224	SGL_RS06675		2022.19	-0.152161	0.115251	-1.32026	0.18675	0.362121	Not Significant
sll0822	SGL_RS15210		38750.5	-0.130752	0.0991396	-1.31887	0.187214	0.362826	Not Significant
sll1049	SGL_RS02265		3822.54	0.131215	0.0999882	1.3123	0.189419	0.3649	Not Significant
slr0677	SGL_RS03845		8267.44	0.114263	0.0870637	1.31241	0.189381	0.3649	Not Significant
sll1501	SGL_RS04180	cbiA	8738.47	0.149249	0.11364	1.31335	0.189066	0.3649	Not Significant
slr1759	SGL_RS04345		1269.12	0.180239	0.137064	1.315	0.188512	0.3649	Not Significant
ssr2848	SGL_RS05255		291.296	0.211142	0.160877	1.31244	0.189371	0.3649	Not Significant
sll1800	SGL_RS05845	rplD	4980.69	-0.189659	0.144447	-1.313	0.189182	0.3649	Not Significant
sll1536	SGL_RS11520	moeB	19137.9	-0.161831	0.123301	-1.31249	0.189354	0.3649	Not Significant
slr0355	SGL_RS13315	bioU	5684.19	0.19674	0.149748	1.3138	0.188912	0.3649	Not Significant
sll0480	SGL_RS15455	dapL	8829.3	-0.130256	0.0992735	-1.31209	0.18949	0.3649	Not Significant
slr8038	SGL_RS01315		5528.26	-0.125191	0.0952322	-1.31458	0.18865	0.3649	Not Significant
slr5040	SGL_RS00180		487.375	-0.178093	0.135676	-1.31264	0.189304	0.3649	Not Significant
slr6087	SGL_RS01770		17.1601	-0.737518	0.562042	-1.31221	0.189449	0.3649	Not Significant
sll0007	SGL_RS13485		3656.64	-0.158178	0.120667	-1.31086	0.189904	0.365502	Not Significant
slr1876	SGL_RS07590		222.546	-0.227801	0.173963	-1.30948	0.190373	0.366211	Not Significant
sll0418	SGL_RS11800		2980.33	0.136806	0.104508	1.30905	0.190516	0.366292	Not Significant
sll0207	SGL_RS13560		2141.44	0.146978	0.11234	1.30833	0.190762	0.366571	Not Significant
SGL_RS19855			24.2894	0.693601	0.530653	1.30707	0.191188	0.367	Not Significant
slr1461	SGL_RS17185		4739.51	-0.129601	0.0991379	-1.30728	0.191118	0.367	Not Significant
slr6068	SGL_RS01680		1.8002	-2.41715	1.8511	-1.30579	0.191623	0.367641	Not Significant
ssl1326	SGL_RS02410		552.794	0.164396	0.125927	1.30548	0.191728	0.367648	Not Significant
slr1203	SGL_RS06025		2296.81	0.179999	0.137939	1.30492	0.191919	0.367819	Not Significant
slr0929	SGL_RS16830		2485.24	-0.129886	0.0995947	-1.30414	0.192185	0.368134	Not Significant
sll0896	SGL_RS16875	ruvC	372.014	0.20522	0.157515	1.30286	0.192621	0.368776	Not Significant
sll0225	SGL_RS02565		616.652	-0.165974	0.127699	-1.29973	0.193693	0.370273	Not Significant
sll1353	SGL_RS06945		6207.83	0.15634	0.120248	1.30014	0.193553	0.370273	Not Significant
slr0610	SGL_RS18385		663.462	0.178836	0.1376	1.29968	0.19371	0.370273	Not Significant
slr0065	SGL_RS13960		240.008	0.223693	0.172388	1.29761	0.19442	0.37124	Not Significant
slr0201	SGL_RS14620		4064.94	0.120498	0.0928547	1.2977	0.194389	0.37124	Not Significant
SGL_RS16815			2148.97	0.143975	0.111001	1.29706	0.19461	0.371408	Not Significant
sll0634	SGL_RS03975	btpA	2210.34	0.137522	0.106135	1.29572	0.195071	0.371963	Not Significant
sll0586	SGL_RS15645		511.078	0.204576	0.157898	1.29562	0.195106	0.371963	Not Significant
slr1591	SGL_RS03995		702.479	0.167896	0.129764	1.29385	0.195718	0.372737	Not Significant
sll0985	SGL_RS04955		3681.79	-0.121593	0.0939749	-1.29389	0.195705	0.372737	Not Significant
slr1213	SGL_RS06080		587.275	-0.178454	0.138138	-1.29185	0.19641	0.373736	Not Significant
slr1255	SGL_RS08445	crtB	4071.22	-0.137077	0.106119	-1.29174	0.196448	0.373736	Not Significant
ssl5065	SGL_RS00295		170.399	-0.252692	0.195727	-1.29104	0.196688	0.373997	Not Significant
slr2036	SGL_RS04560		169.57	-0.393116	0.304806	-1.28973	0.197145	0.374669	Not Significant
slr1065	SGL_RS03630		20137	-0.120025	0.0931865	-1.28801	0.197743	0.375411	Not Significant
slr1195	SGL_RS05975		2029.4	0.13226	0.102665	1.28827	0.197651	0.375411	Not Significant
sll1006	SGL_RS04285		2320.73	-0.139087	0.108036	-1.28741	0.197951	0.37561	Not Significant
sll1670	SGL_RS03065	hrcA	8749.84	0.113728	0.0883775	1.28684	0.19815	0.375791	Not Significant
sll0945	SGL_RS12525	glgA1	7913.98	-0.116992	0.0910242	-1.28528	0.198693	0.376625	Not Significant
sll1265	SGL_RS07125		10156.9	-0.13314	0.103646	-1.28457	0.198943	0.376901	Not Significant
sll1205	SGL_RS01955		440.278	-0.215423	0.167789	-1.28389	0.199181	0.377156	Not Significant
slr0658	SGL_RS17295		3475.37	0.12508	0.0974458	1.28359	0.199286	0.377157	Not Significant
slr1851	SGL_RS04495		7422.79	0.121832	0.0950776	1.2814	0.200054	0.378413	Not Significant
slr0387	SGL_RS13005		1068.38	0.164826	0.128712	1.28058	0.200342	0.37876	Not Significant
sll1261	SGL_RS10000	tsf	11321.5	0.127953	0.0999698	1.27991	0.200575	0.379003	Not Significant
SGL_RS18645			8.35931	-1.14506	0.896515	-1.27724	0.201518	0.379994	Not Significant
sll1222	SGL_RS09750		2822.9	0.127587	0.0998419	1.27789	0.201288	0.379994	Not Significant
slr0373	SGL_RS12920		155222	-0.175157	0.137081	-1.27776	0.201334	0.379994	Not Significant
slr0305	SGL_RS15910		587.186	-0.166332	0.130205	-1.27746	0.201439	0.379994	Not Significant
SGL_RS19480			171.53	0.288195	0.22599	1.27526	0.202218	0.381115	Not Significant
slr1004	SGL_RS11295		62406.4	0.15219	0.119373	1.27491	0.202342	0.381152	Not Significant
sll1772	SGL_RS07540	mutS2	1249.09	-0.162741	0.127694	-1.27446	0.202502	0.381168	Not Significant
sll0691	SGL_RS14140		3085.76	-0.145892	0.114489	-1.27429	0.202561	0.381168	Not Significant
sll1194	SGL_RS03265	psbU	122094	-0.126792	0.0996803	-1.27198	0.203379	0.382113	Not Significant
SGL_RS14020			116.549	0.303639	0.238633	1.27241	0.203229	0.382113	Not Significant
slr1588	SGL_RS17625		4454.41	0.163744	0.128726	1.27204	0.20336	0.382113	Not Significant
sll1571	SGL_RS05310		15285.2	0.15663	0.123308	1.27023	0.204004	0.38274	Not Significant
sll1534	SGL_RS11540		5588.09	-0.171584	0.13503	-1.27072	0.203829	0.38274	Not Significant
slr6040	SGL_RS01550		5716.85	-0.192514	0.151568	-1.27016	0.204029	0.38274	Not Significant
sll0322	SGL_RS13225	hypF	1306.22	-0.145848	0.114915	-1.26918	0.204376	0.383191	Not Significant
sll1892	SGL_RS10255		3834.53	-0.119897	0.0945006	-1.26874	0.204534	0.38329	Not Significant
sll1163	SGL_RS08330		430.846	-0.243889	0.192473	-1.26713	0.205108	0.384086	Not Significant
slr1334	SGL_RS09775		2186.71	-0.156492	0.123518	-1.26696	0.20517	0.384086	Not Significant
slr1211	SGL_RS06070	cobN	1048.77	-0.183945	0.145499	-1.26423	0.206148	0.385717	Not Significant
slr1534	SGL_RS10890		590.517	0.187086	0.148023	1.2639	0.206265	0.385737	Not Significant
sll0369	SGL_RS14535		904.118	0.157168	0.124501	1.26238	0.20681	0.386557	Not Significant
sll1956	SGL_RS08545		4547.11	-0.134576	0.106658	-1.26176	0.207037	0.386781	Not Significant
slr1778	SGL_RS02950		1418.81	-0.184627	0.146395	-1.26116	0.207251	0.386904	Not Significant
sll1582	SGL_RS05205		4380.82	-0.180756	0.143351	-1.26093	0.207333	0.386904	Not Significant
sll1799	SGL_RS05850	rplC	7359.81	-0.190672	0.15128	-1.26039	0.207529	0.386904	Not Significant
slr0288	SGL_RS11925		16581.6	-0.129916	0.103057	-1.26063	0.207443	0.386904	Not Significant
slr1657	SGL_RS17835		2009.96	-0.131233	0.10446	-1.2563	0.209008	0.389461	Not Significant
ssr1425	SGL_RS15185	ycf34	5456.51	0.123694	0.0985174	1.25555	0.209278	0.389764	Not Significant
SGL_RS07210			85.6024	0.349774	0.279171	1.25291	0.21024	0.391355	Not Significant
slr1362	SGL_RS07040		1679.78	0.1309	0.104518	1.25242	0.210415	0.39148	Not Significant
slr1160	SGL_RS10955		3816.39	-0.156137	0.124893	-1.25017	0.211237	0.392807	Not Significant
sll0448	SGL_RS17970		387.735	-0.21945	0.175693	-1.24905	0.211646	0.393366	Not Significant
ssl2971	SGL_RS11620		2222.55	-0.161992	0.129747	-1.24853	0.211838	0.393521	Not Significant
sll1355	SGL_RS06905		4382.59	0.142711	0.114438	1.24705	0.212378	0.394121	Not Significant
sll1275	SGL_RS07035	pyk2	6631.71	-0.112544	0.0902361	-1.24721	0.212319	0.394121	Not Significant
slr1857	SGL_RS07435	glgX	25531.4	0.117083	0.0941437	1.24366	0.213624	0.395772	Not Significant
sll0148	SGL_RS12155		6700.54	-0.1382	0.11117	-1.24315	0.213813	0.395772	Not Significant
SGL_RS12685			39.8348	-0.463947	0.373105	-1.24347	0.213693	0.395772	Not Significant
ssr1513	SGL_RS14745		46.9047	0.450906	0.362681	1.24326	0.213773	0.395772	Not Significant
sll0790	SGL_RS16105		286.015	-0.241697	0.194328	-1.24376	0.21359	0.395772	Not Significant
sll1025	SGL_RS03755		1003.85	0.143361	0.115452	1.24173	0.214336	0.396538	Not Significant
slr1128	SGL_RS02275		19782.7	0.129344	0.104226	1.24099	0.214609	0.396841	Not Significant
slr1615	SGL_RS03585		4714.94	0.125122	0.100927	1.23972	0.215079	0.397506	Not Significant
sll1084	SGL_RS05535		3932.73	0.117075	0.0945347	1.23843	0.215557	0.398187	Not Significant
sll1218	SGL_RS09780		6705.04	-0.125023	0.101171	-1.23575	0.216551	0.39982	Not Significant
sll0082	SGL_RS15300		544.868	-0.223545	0.181073	-1.23456	0.216994	0.400435	Not Significant
ssl2598	SGL_RS07325	psbH	47606.1	-0.145302	0.117867	-1.23276	0.217664	0.401467	Not Significant
slr1093	SGL_RS02755	folK	1169.54	0.147795	0.119935	1.2323	0.217838	0.401583	Not Significant
sll1192	SGL_RS03285	crcB	269.124	0.287078	0.233263	1.2307	0.218434	0.402274	Not Significant
slr1249	SGL_RS08400	pstA	6558.81	0.59533	0.48365	1.23091	0.218357	0.402274	Not Significant
slr2012	SGL_RS05390		1063.38	0.161677	0.13143	1.23014	0.218643	0.402455	Not Significant
sll1074	SGL_RS05615	leuS	15487.6	0.123148	0.100181	1.22926	0.218975	0.402568	Not Significant
slr1250	SGL_RS08405	pstB3	6617.96	0.511644	0.416307	1.22901	0.219069	0.402568	Not Significant
slr0440	SGL_RS13800		1375.36	0.139471	0.113502	1.2288	0.219149	0.402568	Not Significant
sll0671	SGL_RS16275	corA	162.555	-0.244993	0.19931	-1.22921	0.218994	0.402568	Not Significant
slr1253	SGL_RS08435		3082.9	0.135984	0.110739	1.22796	0.219461	0.402733	Not Significant
slr0286	SGL_RS11905		1571.91	-0.127816	0.104077	-1.22809	0.219412	0.402733	Not Significant
sll0221	SGL_RS02625		2065.24	0.135401	0.110498	1.22536	0.220438	0.404322	Not Significant
slr1567	SGL_RS17460		2520.5	-0.121876	0.099488	-1.22503	0.220563	0.404347	Not Significant
slr2006	SGL_RS05350		1669.56	0.162876	0.133086	1.22385	0.22101	0.404679	Not Significant
sll0362	SGL_RS11990	alaS	2824.46	-0.122814	0.100366	-1.22366	0.221079	0.404679	Not Significant
slr7080	SGL_RS01000		1664.85	-0.135432	0.11065	-1.22396	0.220967	0.404679	Not Significant
slr0151	SGL_RS12140		10869.2	0.138345	0.113507	1.21883	0.222909	0.407823	Not Significant
sll0017	SGL_RS13390	hemL	7160.5	-0.141456	0.116218	-1.21716	0.223544	0.408779	Not Significant
sll0740	SGL_RS16425		2727.45	-0.131285	0.108016	-1.21542	0.224205	0.409781	Not Significant
sll1291	SGL_RS05095		30367.8	0.160299	0.132001	1.21438	0.224604	0.410031	Not Significant
slr0625	SGL_RS15670		6104.68	-0.112933	0.0929918	-1.21444	0.224579	0.410031	Not Significant
SGL_RS00660			3570.13	-0.189355	0.155954	-1.21418	0.224681	0.410031	Not Significant
ssr2998	SGL_RS03085		1879.47	0.13885	0.11455	1.21213	0.225461	0.411248	Not Significant
slr0643	SGL_RS14320		3585.17	0.114713	0.0947399	1.21082	0.225966	0.411962	Not Significant
slr1510	SGL_RS09320	plsX	3003.4	-0.123817	0.102367	-1.20954	0.226457	0.412649	Not Significant
sll1143	SGL_RS06660	pcrA	8387.89	0.129129	0.106866	1.20832	0.226923	0.413291	Not Significant
sll0863	SGL_RS07295		395.182	0.165587	0.137112	1.20768	0.227171	0.413328	Not Significant
sll0596	SGL_RS15575		1620.51	0.160794	0.133127	1.20782	0.227115	0.413328	Not Significant
slr0500	SGL_RS15395	hisB	2201.57	0.126081	0.104507	1.20644	0.227647	0.413779	Not Significant
sll0744	SGL_RS16405		2151.37	0.12721	0.105427	1.20662	0.227579	0.413779	Not Significant
slr0940	SGL_RS11330	crtQ	1782.14	0.161085	0.133814	1.2038	0.228665	0.415422	Not Significant
slr0727	SGL_RS02355		2249.49	-0.123957	0.103025	-1.20317	0.228911	0.415661	Not Significant
slr2104	SGL_RS09220		1323.16	-0.145389	0.120902	-1.20253	0.229156	0.41569	Not Significant
[truncated: 1,629 more rows]

## Sheet: Fig_7_source data_HL700
locus_tag	new_locus_tag	gene	baseMean	log2FoldChange	lfcSE	stat	pvalue	padj	significance
slr0376	SGL_RS12930		694836	4.1741	0.169432	24.6359	5.21637e-134	1.89667e-130	Up-regulated
sll0615	SGL_RS14245		1341.59	-2.67504	0.165199	-16.1929	5.66144e-59	1.02925e-55	Down-regulated
slr0798	SGL_RS16100	ziaA	7533.59	-2.47312	0.162071	-15.2595	1.42313e-52	1.72484e-49	Down-regulated
slr1600	SGL_RS04085		12794.8	-1.56858	0.116914	-13.4165	4.83766e-41	4.39743e-38	Down-regulated
slr0355	SGL_RS13315	bioU	35218.1	2.50493	0.190779	13.13	2.21561e-39	1.61119e-36	Up-regulated
slr0676	SGL_RS03840	cysC	11143.1	-1.88348	0.148769	-12.6605	9.78982e-37	5.93263e-34	Down-regulated
sll0900	SGL_RS16845	hisG	5560.32	-1.5255	0.121343	-12.5718	3.0174e-36	1.56733e-33	Down-regulated
slr0949	SGL_RS11390		3343.12	-1.48422	0.120402	-12.3272	6.46551e-35	2.93858e-32	Down-regulated
sll0574	SGL_RS18245		4221.08	-1.54131	0.125144	-12.3163	7.4037e-35	2.99109e-32	Down-regulated
sll0454	SGL_RS14135	pheS	12347.7	-1.46536	0.119513	-12.2611	1.46408e-34	5.32339e-32	Down-regulated
sll1441	SGL_RS10825		6784.63	-1.91628	0.16309	-11.7498	7.07445e-32	2.33843e-29	Down-regulated
slr0080	SGL_RS15305	rnhA	4357.44	-1.33887	0.121826	-10.99	4.269e-28	1.29351e-25	Down-regulated
slr1251	SGL_RS08410		15755.7	-2.14511	0.205066	-10.4606	1.31076e-25	3.66611e-23	Down-regulated
ssr3465	SGL_RS04605		16122.4	1.39099	0.133904	10.388	2.81296e-25	6.81861e-23	Up-regulated
sll1069	SGL_RS05665	fabF	19934.6	-1.30042	0.125164	-10.3897	2.76114e-25	6.81861e-23	Down-regulated
slr1764	SGL_RS04380		4401.55	-2.16981	0.211936	-10.238	1.33931e-24	3.04357e-22	Down-regulated
slr1975	SGL_RS10340		5818.69	-1.34477	0.133833	-10.0481	9.36253e-24	2.00248e-21	Down-regulated
sll1961	SGL_RS08500		12929.4	1.13252	0.112959	10.026	1.17181e-23	2.36705e-21	Up-regulated
sll0473	SGL_RS15515		4003.91	1.44465	0.144345	10.0083	1.40105e-23	2.68117e-21	Up-regulated
slr1166	SGL_RS11005		3774.99	-1.86559	0.188156	-9.91512	3.57809e-23	6.50497e-21	Down-regulated
slr0373	SGL_RS12920		184267	1.93998	0.198043	9.79576	1.17408e-22	2.03283e-20	Up-regulated
slr0374	SGL_RS12925		253870	1.96002	0.20021	9.78987	1.24461e-22	2.057e-20	Up-regulated
slr1770	SGL_RS04425		17490.4	1.72469	0.177292	9.72798	2.29104e-22	3.62183e-20	Up-regulated
sll1086	SGL_RS11065		17389	1.84184	0.190197	9.68384	3.53203e-22	5.35103e-20	Up-regulated
slr7024	SGL_RS00720		7377.82	1.25234	0.129425	9.67622	3.8054e-22	5.47685e-20	Up-regulated
slr7073	SGL_RS00975		11145	1.5212	0.157258	9.67328	3.91634e-22	5.47685e-20	Up-regulated
sll1108	SGL_RS18120	surE	5719	-1.45115	0.151237	-9.59525	8.37171e-22	1.12739e-19	Down-regulated
SGL_RS19635			54126.5	2.02842	0.214773	9.44448	3.57165e-21	4.57233e-19	Up-regulated
slr0899	SGL_RS14780	cynS	1185.19	-1.90898	0.202173	-9.4423	3.6468e-21	4.57233e-19	Down-regulated
slr2067	SGL_RS08580	apcA	200266	-2.18867	0.231997	-9.43406	3.94504e-21	4.78139e-19	Down-regulated
sll1516	SGL_RS04020		6325.49	1.07998	0.114857	9.4028	5.31303e-21	6.23167e-19	Up-regulated
sll0740	SGL_RS16425		4995.07	1.41032	0.150232	9.3876	6.1382e-21	6.97453e-19	Up-regulated
sll2010	SGL_RS07755	murD	5423.45	-1.25986	0.134744	-9.34999	8.76587e-21	9.6584e-19	Down-regulated
slr1756	SGL_RS04340	glnA	31330	-1.63113	0.174918	-9.32508	1.10904e-20	1.18602e-18	Down-regulated
slr7025	SGL_RS00725		912.439	1.42612	0.153115	9.31407	1.23023e-20	1.27803e-18	Up-regulated
slr1113	SGL_RS02120		8798.35	1.24814	0.134302	9.29357	1.49194e-20	1.50686e-18	Up-regulated
sll1109	SGL_RS18115		7179.72	-1.74745	0.189	-9.24579	2.33503e-20	2.29464e-18	Down-regulated
slr2016	SGL_RS05410		1595.81	1.37644	0.149477	9.20837	3.31106e-20	3.16816e-18	Up-regulated
slr1875	SGL_RS07580		3007.12	-1.20921	0.131551	-9.19195	3.8579e-20	3.59675e-18	Down-regulated
sll0576	SGL_RS18235		5131.54	-1.35142	0.148327	-9.11108	8.15635e-20	7.41412e-18	Down-regulated
slr1805	SGL_RS07855		9975.46	1.80027	0.197861	9.09865	9.14644e-20	8.11133e-18	Up-regulated
slr1763	SGL_RS04370		6270.09	-1.56556	0.172401	-9.08093	1.07648e-19	9.31924e-18	Down-regulated
SGL_RS19675			16555.4	2.5004	0.275695	9.06944	1.1963e-19	1.01157e-17	Up-regulated
slr5119	SGL_RS00565		46061.5	1.37772	0.152248	9.04913	1.44111e-19	1.19088e-17	Up-regulated
sll1924	SGL_RS05400		1655.11	1.23562	0.138494	8.92183	4.58646e-19	3.70586e-17	Up-regulated
SGL_RS18440			4.076e+06	1.6013	0.180216	8.88541	6.36838e-19	5.03379e-17	Up-regulated
sll1260	SGL_RS10005	rpsB	27732	-1.15388	0.131698	-8.76154	1.92593e-18	1.45889e-16	Down-regulated
sll0422	SGL_RS11775		2105.69	-1.5547	0.177436	-8.76204	1.91756e-18	1.45889e-16	Down-regulated
slr1431	SGL_RS17115		12288.4	-1.38976	0.159069	-8.73685	2.39711e-18	1.77875e-16	Down-regulated
slr1262	SGL_RS08490		6699.82	1.07746	0.123485	8.72545	2.65128e-18	1.92801e-16	Up-regulated
[truncated: 3,586 more rows]

[truncated: 13 more sheets: Fig_7, Ext_Fig_8A, Ext_Fig_8B,C_LL50_435 nm, Ext_Fig_8B,C_HL700_435 nm, Ext_Fig_8B,C_LL50_600 nm, Ext_Fig_8B,C_HL700_600 nm, Ext_Fig_8D, Ext_Fig_8E, Ext_Fig_9A, Ext_Fig_9B, Ext_Fig_9C, Ext_Fig_9D, Ext_Fig_9E]
