# Supplementary material
Source: Research Square preprint supplement (doi:10.21203/rs.3.rs-6305715/v1)
Supplement: Supplementary file 9 [file ee8b3f6d0de1767f9d7b751c.xlsx]

## Sheet: description
Supplemental Data 1. Original data from characterisation of final batch cultures, (pre-)selection and characterisation of monoclonal strains.
Refers to Figure 1
abbreviation	meaning
Cars	total carotenoids
Chl a	chlorophyll a
Fm-	quenched maximum fluorescence
Fm-/Fv-	quenched maximum quantum yield
Fo	minimum fluorescence
Fv-	quenched variable fluorescence
lag	lag phase
tg	generation time

## Sheet: Fig_1D
	FL0_LT				FL0_a				FL0_b				FL0_c				FL+_LT				FL+_a				FL+_b				FL+_c
replicate #	1	2	3	4	1	2	3	4	1	2	3	4	1	2	3	4	1	2	3	4	1	2	3	4	1	2	3	4	1	2	3	4
tg [h]	61.5469	67.0473	62.7501	66.0235	41.9458	40.6694	46.8666	43.9937	45.7876	41.3655	49.7209	42.5378	40.7584	44.9987	45.4604	41.2658	NA	NA	NA	NA	32.2224	34.9847	26.3157	27.3023	34.1582	39.0735	27.6722	25.7546	36.2579	37.5438	32.8437	33.3806

## Sheet: Fig_1E
	FL0_LT				FL0_a				FL0_b				FL0_c				FL+_LT				FL+_a				FL+_b				FL+_c
replicate #	1	2	3	4	1	2	3	4	1	2	3	4	1	2	3	4	1	2	3	4	1	2	3	4	1	2	3	4	1	2	3	4
final OD730nm	0.7	0.64	0.64	0.64	2.15	2.27	2	2.06	2.07	2.33	1.91	2.09	2	1.93	2.29	2.2	0.28	0.145	0.113	0.26	3.47	1.48	2.6	1.61	3.21	3.26	2.45	3	3.47	2.33	2.67	2.78

## Sheet: Fig_1F
	FL0_LT				FL0_a				FL0_b				FL0_c				FL+_LT				FL+_a				FL+_b				FL+_c
replicate #	1	2	3	4	1	2	3	4	1	2	3	4	1	2	3	4	1	2	3	4	1	2	3	4	1	2	3	4	1	2	3	4
Chl a [µg ml-1]	2.81331	2.94276	2.78311	2.71191	4.04738	3.87478	3.71513	3.79927	3.93087	3.89635	3.74102	3.81869	3.75396	3.68924	3.82516	3.65688	0.3042	0.52426	0.0194171	0.245949	3.01612	2.62777	2.71839	2.38182	2.52422	1.78637	2.61483	2.56952	2.86078	2.63425	2.66014	2.7378
Cars [µg ml-1]	1.94851	2.04487	1.79204	1.73414	1.48759	1.43402	1.38179	1.3988	1.47402	1.4262	1.40634	1.40081	1.46726	1.38665	1.37131	1.41874	0.371629	0.484166	0.300654	0.406319	1.70757	1.70355	1.6345	1.47823	1.36552	1.1081	1.41412	1.49163	1.52406	1.55641	1.5425	1.52792

## Sheet: Fig_1H_I_pre-selection
	LT																									Fm-/Fv-
Fo	676.59																											Transposed
Fm-	776.76																											FL0			FL+
Fv-	100.17																											a	b	c	α	β	γ
Fm-/Fv-	0.13																											0.2	0.21	0.2	0.35	0.31	0.28
																												0.19	0.19	0.17	0.2	0.32	0.26
	FL0_a																											0.19	0.19	0.17	0.35	0.3	0.24
clone #	1	2	3	4	5	6	7	8	9	10	11	12	13	14	15	16	17	18										0.18	0.2	0.17	0.19	0.33	0.24
Fo	553.1	690.34	721.98	742.64	617.62	471.81	787.86	935.04	1106.33	1237.22	908.62	792.5	952.02	1294.87	1482.53	1369.18	1316.56	1062.04										0.19	0.19	0.17	0.3	0.32	0.25
Fm-	691.21	848.15	892.23	907.99	765.94	593.43	976.7	1183.42	1377.16	1505.74	1122.05	968.23	1211.42	1593.99	1799.12	1640.52	1619.49	1297.76										0.2	0.2	0.17	0.35	0.29	0.27
Fv-	138.11	157.81	170.25	165.35	148.33	121.62	188.84	248.38	270.83	268.52	213.43	175.73	259.4	299.12	316.59	271.35	302.93	235.72										0.19	0.2	0.18	0.39	0.33	0.25
Fm-/Fv-	0.2	0.19	0.19	0.18	0.19	0.2	0.19	0.21	0.2	0.18	0.19	0.18	0.21	0.19	0.18	0.17	0.19	0.18										0.21	0.19	0.19	0.3	0.29	0.26
																												0.2	0.19	0.17	0.28	0.36	0.24
	FL0_b																											0.18	0.16	0.12	0.31	0.35	0.24
clone #	1	2	3	4	5	6	7	8	9	10	11	12	13	14	15	16	17	18	19	20	21	22	23	24				0.19	0.2	0.15	0.34	0.34	0.23
Fo	558.41	773.61	895.01	857.84	824.29	585.84	877.36	1170.47	1073.3	1411.08	1049.34	923.48	927.64	1149.98	1420.55	1362.07	1396.26	744.3	683.49	744.49	914.73	981.45	786.67	675.86				0.18	0.21	0.17	0.31	0.3	0.28
Fm-	710.32	954	1098.37	1069.85	1021.97	736.86	1097.56	1447.47	1332.98	1685.41	1307.3	1164.35	1190.35	1415.79	1702.77	1634.07	1706.06	1043.77	869.98	923.94	1130.81	1202.3	983.26	851.5				0.21	0.22	0.19	0.42	0.36	0.27
Fv-	151.91	180.39	203.37	212.01	197.68	151.02	220.21	277	259.68	274.33	257.96	240.86	262.71	265.81	282.22	272	309.8	299.47	186.49	179.45	216.08	220.85	196.59	175.64				0.19	0.19	0.19	0.43	0.38	0.45
Fm-/Fv-	0.21	0.19	0.19	0.2	0.19	0.2	0.2	0.19	0.19	0.16	0.2	0.21	0.22	0.19	0.17	0.17	0.18	0.29	0.21	0.19	0.19	0.18	0.2	0.21				0.18	0.17	0.18	0.41	0.44	0.48
																												0.17	0.17	0.15	0.3	0.43	0.26
	FL0_c																											0.19	0.18	0.16	0.41	0.41	0.26
clone #	1	2	3	4	5	6	7	8	9	10	11	12	13	14	15	16	17	18	19	20	21	22	23	24				0.18	0.29	0.19	0.41	0.34	0.29
Fo	547.2	740.81	909.96	956.23	870.16	713.1	782.93	1138.02	1290.17	1585.92	1335.75	1267.06	829.99	1145.12	1282.79	1233.84	1561.58	1107.67	656.56	822.32	1073.32	1131.19	1113.56	799.39					0.21	0.2	0.33	0.33	0.42
Fm-	680.62	892.85	1096.85	1149.56	1043.86	858.43	960.58	1397.98	1557.51	1792.44	1574.86	1517.47	1022.99	1422.28	1560.69	1448.21	1861.76	1368.71	820.43	1071.47	1420.1	1414.11	1380.2	982.88					0.19	0.23	0.41	0.31	0.25
Fv-	133.42	152.04	186.89	193.33	173.7	145.33	177.64	259.95	267.34	206.52	239.11	250.41	193.01	277.15	277.9	214.37	300.19	261.03	163.87	249.15	346.77	282.92	266.65	183.49					0.19	0.24	0.44	0.41	0.49
Fm-/Fv-	0.2	0.17	0.17	0.17	0.17	0.17	0.18	0.19	0.17	0.12	0.15	0.17	0.19	0.19	0.18	0.15	0.16	0.19	0.2	0.23	0.24	0.2	0.19	0.19					0.18	0.2	0.44	0.31	0.35
																													0.2	0.19	0.41	0.29	0.52
	FL+_α																												0.21	0.19	0.46	0.3	0.51
	1	2	3	4	5	6	7	8	9	10	11	12	13	14	15	16	17	18	19	20	21	22	23	24
clone #	5	3	1	2	4	6	8	9	7	10	12	11	16	15	17	13	14	18	19	20	21	23	22	24			Average	0.189242			0.337222
Fo	737.8	915.43	825.19	831.16	908.2	636.95	813.05	1159.87	1174.81	1206.96	1185.52	863.28	722.36	792.39	945.85	1138.63	888.74	758.31	553.79	559.76	520.42	593.67	632.64	363.45			SD	0.0226213			0.076733
Fm-	1142.71	1143.21	1276.03	1021.53	1290.12	984.92	1328.81	1659.99	1621.68	1739.41	1805.25	1246.29	1242.94	1381.15	1611.84	1623.25	1511.53	1276.67	826.49	946.58	921.49	1054.48	1076.13	678.85			Median	0.19			0.325
Fv-	404.9	227.79	450.83	190.37	381.91	347.97	515.76	500.12	446.87	532.46	619.73	383.01	520.58	588.76	665.99	484.63	622.79	518.36	272.7	386.82	401.07	460.81	443.48	315.39			Q1	0.18			0.28
Fm-/Fv-	0.35	0.2	0.35	0.19	0.3	0.35	0.39	0.3	0.28	0.31	0.34	0.31	0.42	0.43	0.41	0.3	0.41	0.41	0.33	0.41	0.44	0.44	0.41	0.46			Q3	0.2			0.41
																											1.5×IQR	0.03			0.195
	FL+_β
clone #	1	2	3	4	5	6	7	8	9	10	11	12	13	14	15	16	17	18	19	20	21	22	23	24
Fo	710.97	886.55	876.36	829.26	785.73	629.66	789.78	1057.72	1109.84	1096.8	859.07	724.09	782.39	877.65	616.59	788.05	659.54	511.29	448.38	610.88	480.61	630.77	535.75	391.24
Fm-	1032.8	1301.32	1258.26	1242.21	1160.27	887.07	1180.67	1489.82	1732.58	1674.84	1303.53	1038.7	1221.06	1421.13	1107.24	1373.96	1112.71	774.75	674.2	885.44	813.12	911.87	759.11	561.78
Fv-	321.83	414.77	381.9	412.95	374.54	257.42	390.88	432.09	622.75	578.04	444.47	314.6	438.67	543.47	490.65	585.91	453.17	263.46	225.82	274.57	332.5	281.1	223.36	170.53
Fm-/Fv-	0.31	0.32	0.3	0.33	0.32	0.29	0.33	0.29	0.36	0.35	0.34	0.3	0.36	0.38	0.44	0.43	0.41	0.34	0.33	0.31	0.41	0.31	0.29	0.3
	FL+_γ
clone #	1	2	3	4	5	6	7	8	9	10	11	12	13	14	15	16	17	18	19	20	21	22	23	24
Fo	422.39	542.34	633.68	723.13	637.24	590.63	678.17	1115.57	1142.78	1174.7	1178.27	830.02	880.63	607.26	412.25	1069.97	1419.07	913.23	469.19	1045.47	536.48	850.19	354.19	389.65
Fm-	586.81	737.51	839.02	950.04	853.21	814.2	908.67	1498.29	1512.67	1535.79	1531.57	1148.58	1213.02	1109.4	798.19	1448.03	1920.84	1277.85	812.62	1390.52	1050.33	1303.3	737.32	803.29
Fv-	164.42	195.17	205.34	226.91	215.96	223.58	230.5	382.72	369.89	361.08	353.3	318.56	332.39	502.14	385.94	378.06	501.77	364.62	343.43	345.05	513.86	453.11	383.13	413.64
Fm-/Fv-	0.28	0.26	0.24	0.24	0.25	0.27	0.25	0.26	0.24	0.24	0.23	0.28	0.27	0.45	0.48	0.26	0.26	0.29	0.42	0.25	0.49	0.35	0.52	0.51

## Sheet: Fig_1H_I_selection
	LT											Fm-/Fv-
Fo	695.77													Transposed
Fm-	961.85													FL0			FL+
Fv-	266.07													a	b	c	α	β	γ
Fm-/Fv-	0.28													0.39	0.38	0.37	0.44	0.44	0.29
														0.39	0.37	0.42	0.42	0.44	0.19
	FL0_a						FL+_α							0.39	0.42	0.39	0.4	0.53	0.29
clone #	1	2	3	4		clone #	1	2	3	4				0.37	0.37	0.4	0.44	0.53	0.39
Fo	527.49	490.34	491.8	580.3		Fo	472.48	576.04	537.02	501.84
Fm-	859.81	799.9	808.93	921.12		Fm-	843.7	998.15	896.44	890.73			Average	0.388333			0.4
Fv-	332.33	309.56	317.13	340.83		Fv-	371.23	422.11	359.42	388.89			SD	0.0180067			0.0995444
Fm-/Fv-	0.39	0.39	0.39	0.37		Fm-/Fv-	0.44	0.42	0.4	0.44			Median	0.39			0.43
													Q1	0.37			0.315
	FL0_b						FL+_β						Q3	0.3975			0.44
clone #	1	2	3	4		clone #	1	2	3	4			1.5×IQR	0.04125			0.1875
Fo	561.54	529.3	486	550.76		Fo	405.61	468.25	254.84	216.85
Fm-	899.6	843.2	832.28	880.11		Fm-	725.83	837.23	538.99	457.38
Fv-	338.06	313.89	346.28	329.36		Fv-	320.22	368.98	284.15	240.53
Fm-/Fv-	0.38	0.37	0.42	0.37		Fm-/Fv-	0.44	0.44	0.53	0.53
	FL0_c						FL+_γ
clone #	1	2	3	4		clone #	1	2	3	4
Fo	550.59	513.38	486.96	497.5		Fo	594.55	972.98	775.95	467.23
Fm-	868.3	881.21	794.03	827.04		Fm-	831.57	1206.62	1099.23	762.97
Fv-	317.72	367.83	307.07	329.54		Fv-	237.02	233.64	323.27	295.74
Fm-/Fv-	0.37	0.42	0.39	0.4		Fm-/Fv-	0.29	0.19	0.29	0.39

## Sheet: Fig_1J
	grown under FL0
	LT	FL0_a				FL0_b				FL0_c
selected clone #		1	2	3	4	5	6	7	8	9	10	11	12
final OD730nm	0.39	0.42	0.38	4.47	4.14	3.85	4.43	4.39	2.92	2.71	2.89	2.92	1.37
	grown under FL+
	LT	FL+_α				FL+_β				FL+_γ
selected clone #		13	14	15	16	17	18	19	20	21	22	23	24
final OD730nm	0.21	3.94	7.01	7.78	7.42	5.62	8.24	7.45	5.89	5.94	10.85	9.68	13.38
